# Supplementary material
Source: Research Square preprint supplement (doi:10.21203/rs.3.rs-9512208/v1)

# Search Result Report

Filename : C:\Users\User\Desktop\UTSA samples\UV042821HA04\Point  
 Measurement\_Fragment\_111222\_29.apit  
 Acquired Datetime : 2022/11/12 14:35:16

● **Search Parameters**

Library list :  
 IRs Polymer2  
 ATR-Polymer2  
 T-Polymer2  
 Maximum hits: 200  
 Minimum quality : 0  
 Algorithm : DiffDeriv

| Score | Library    | Name  | Comment                                 |
|-------|------------|-------|-----------------------------------------|
| 593   | T-Polymer2 | Epoxy | Epoxy Resin<br>Transmission(Microscope) |

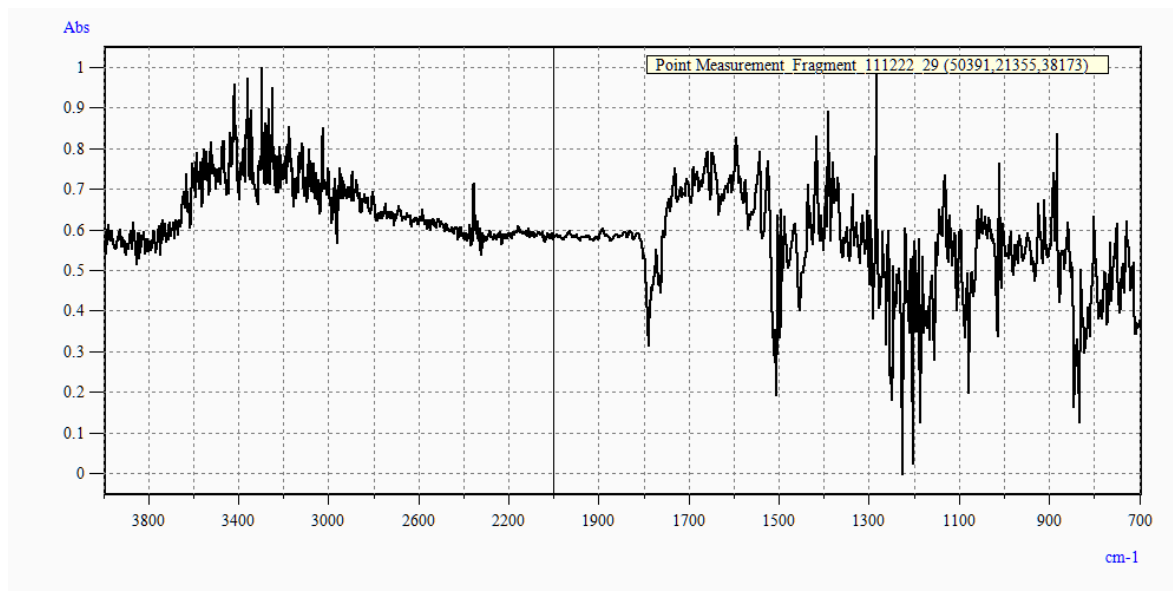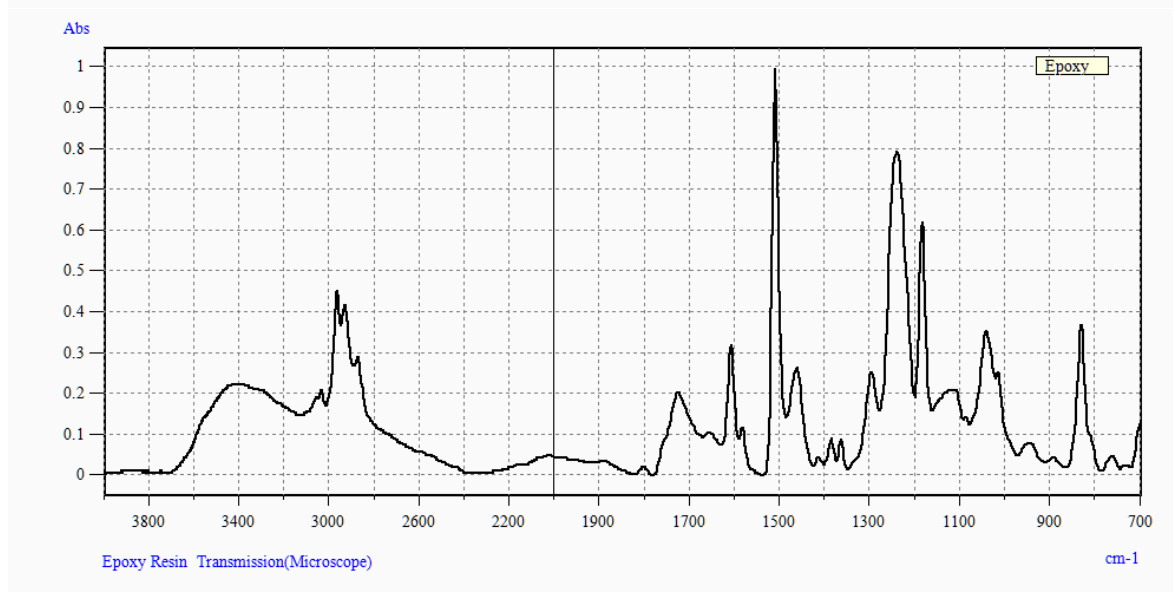

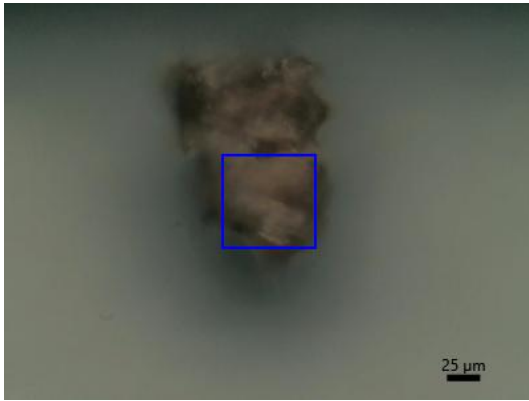

## Search Result Report

Filename : C:\Users\User\Desktop\UTSA samples\UV042821HA04\Point  
 Measurement\_Fragment\_111222\_30.apit  
 Acquired Datetime : 2022/11/12 14:43:27

### ● Search Parameters

Library list :  
 IRs Polymer2  
 ATR-Polymer2  
 T-Polymer2  
 Maximum hits: 200  
 Minimum quality : 0  
 Algorithm : DiffDeriv

| Score | Library      | Name    | Comment                                     |
|-------|--------------|---------|---------------------------------------------|
| 578   | ATR-Polymer2 | D_PTFE2 | Poly(Tetrafluoroethylene)<br>DuraSamplIR-II |

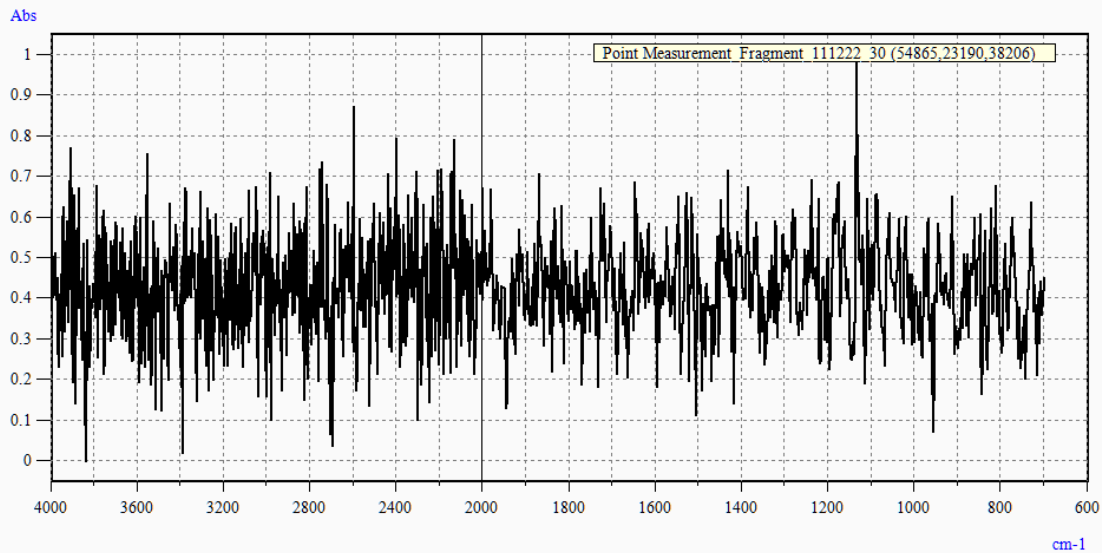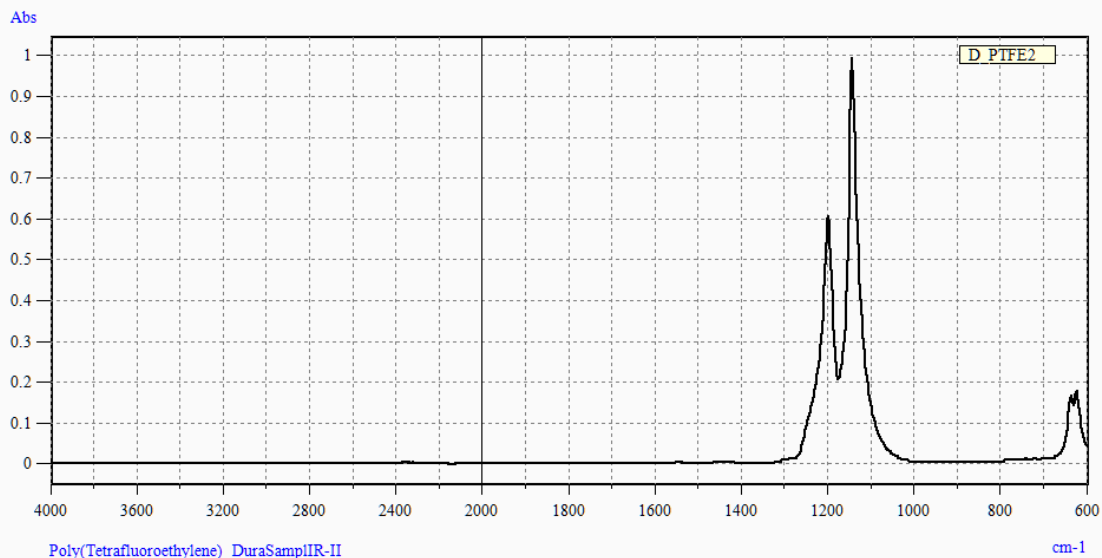

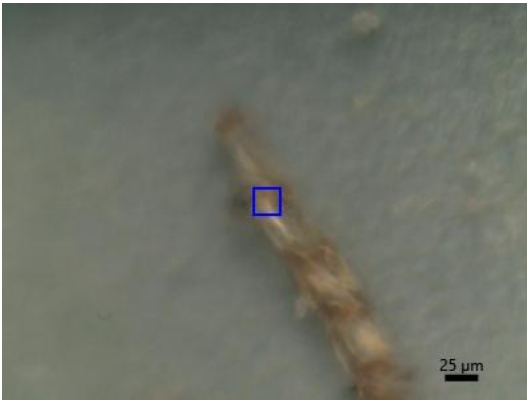

## Search Result Report

Filename : C:\Users\User\Desktop\UTSA samples\UV042821HA04\Point  
 Measurement\_Fragment\_111222\_31.apit  
 Acquired Datetime : 2022/11/12 14:46:48

### ● Search Parameters

Library list :  
 IRs Polymer2  
 ATR-Polymer2  
 T-Polymer2  
 Maximum hits: 200  
 Minimum quality : 0  
 Algorithm : DiffDeriv

| Score | Library      | Name        | Comment                  |
|-------|--------------|-------------|--------------------------|
| 606   | ATR-Polymer2 | D_Polybuten | Polybuten DuraSamplIR-II |

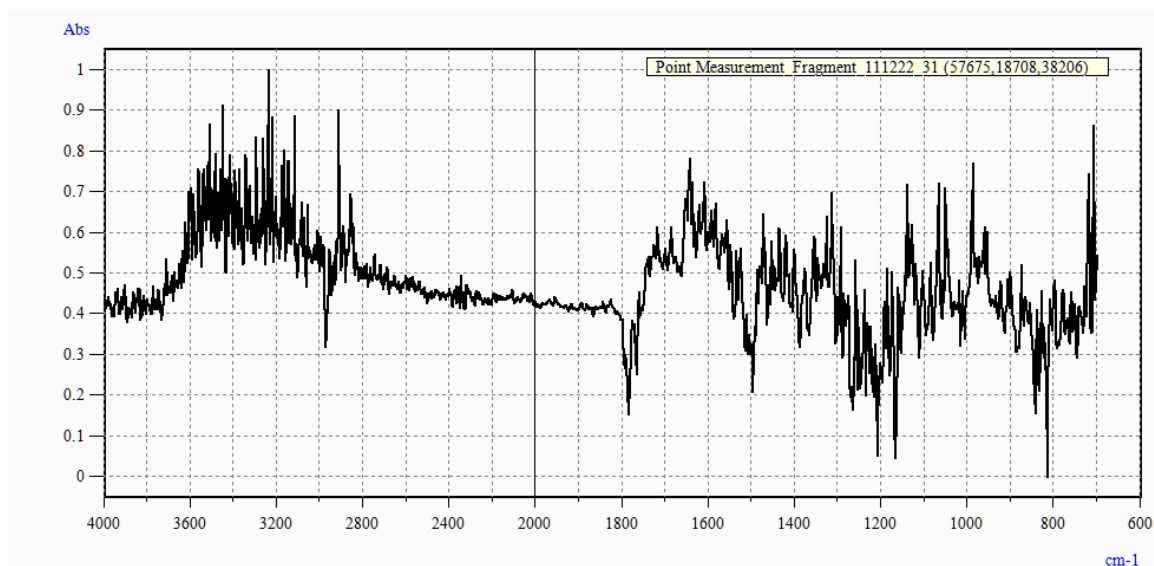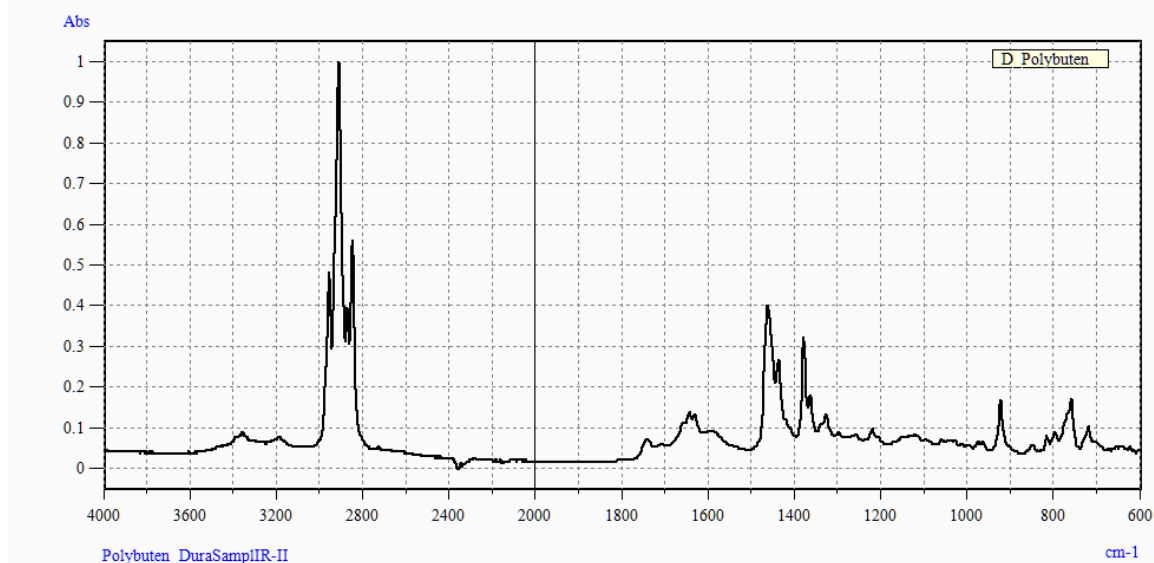

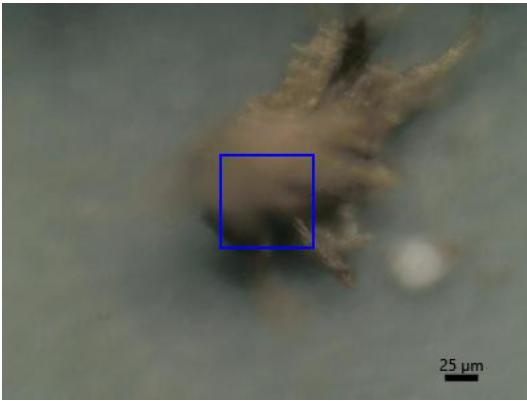

## Search Result Report

Filename : C:\Users\User\Desktop\UTSA samples\UV042821HA04\Point  
 Measurement\_Fragment\_111222\_32.apit  
 Acquired Datetime : 2022/11/12 14:48:14

### ● Search Parameters

Library list :  
 IRs Polymer2  
 ATR-Polymer2  
 T-Polymer2  
 Maximum hits: 200  
 Minimum quality : 0  
 Algorithm : DiffDeriv

| Score | Library      | Name        | Comment                                          |
|-------|--------------|-------------|--------------------------------------------------|
| 573   | ATR-Polymer2 | D_Additive1 | Polymer Additive(Irganox 1010)<br>DuraSamplIR-II |

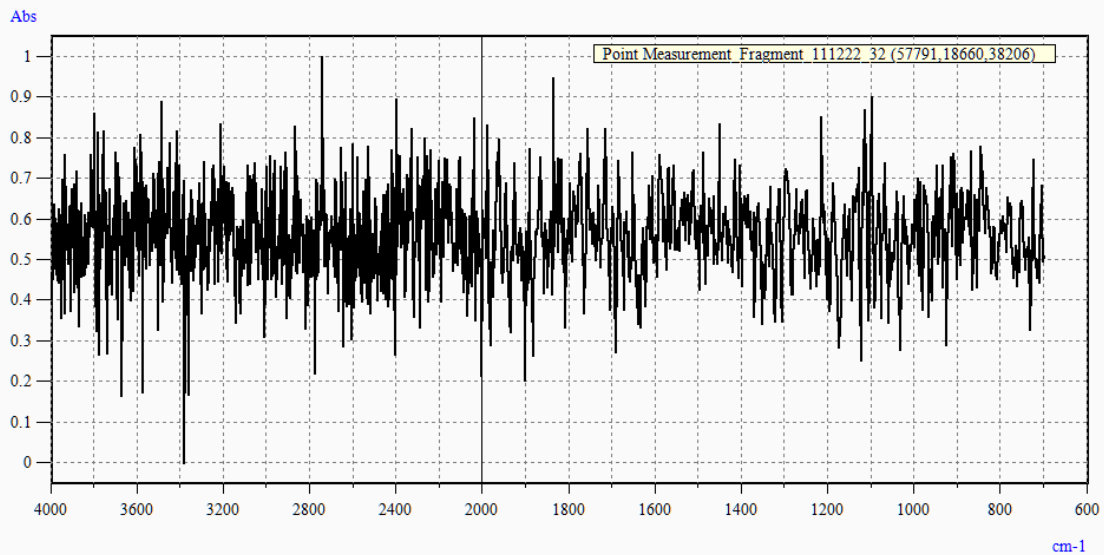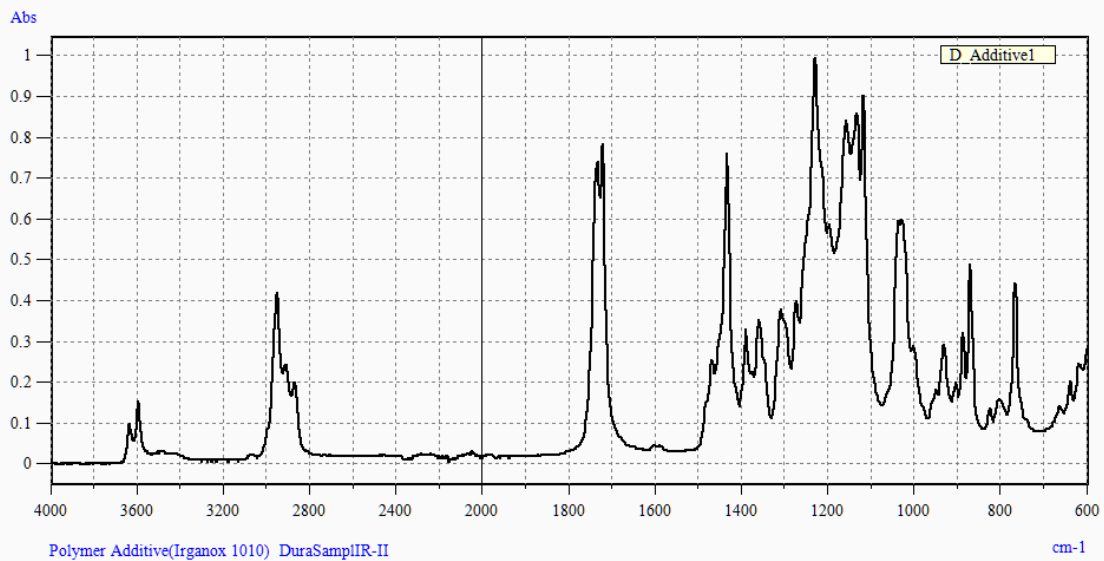

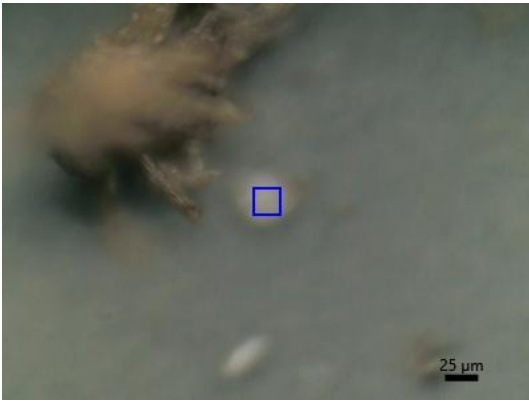

## Search Result Report

Filename : C:\Users\User\Desktop\UTSA samples\UV042821HA04\Point  
 Measurement\_Fragment\_111222\_33.apit  
 Acquired Datetime : 2022/11/12 14:52:47

### ● Search Parameters

Library list :  
 IRs Polymer2  
 ATR-Polymer2  
 T-Polymer2  
 Maximum hits: 200  
 Minimum quality : 0  
 Algorithm : DiffDeriv

| Score | Library    | Name | Comment                                       |
|-------|------------|------|-----------------------------------------------|
| 664   | T-Polymer2 | PC   | Polycarbonate(PC)<br>Transmission(Microscope) |

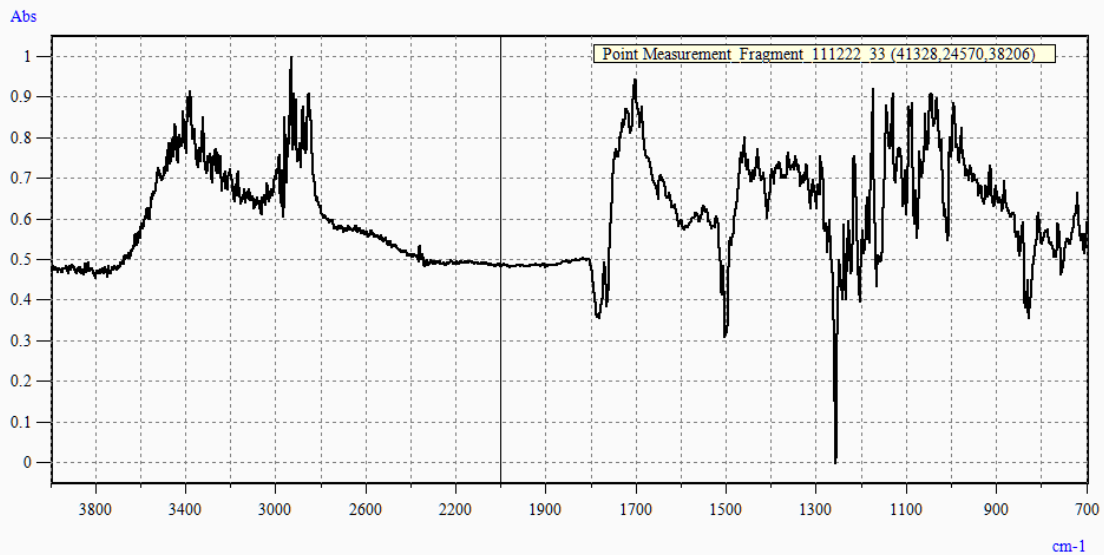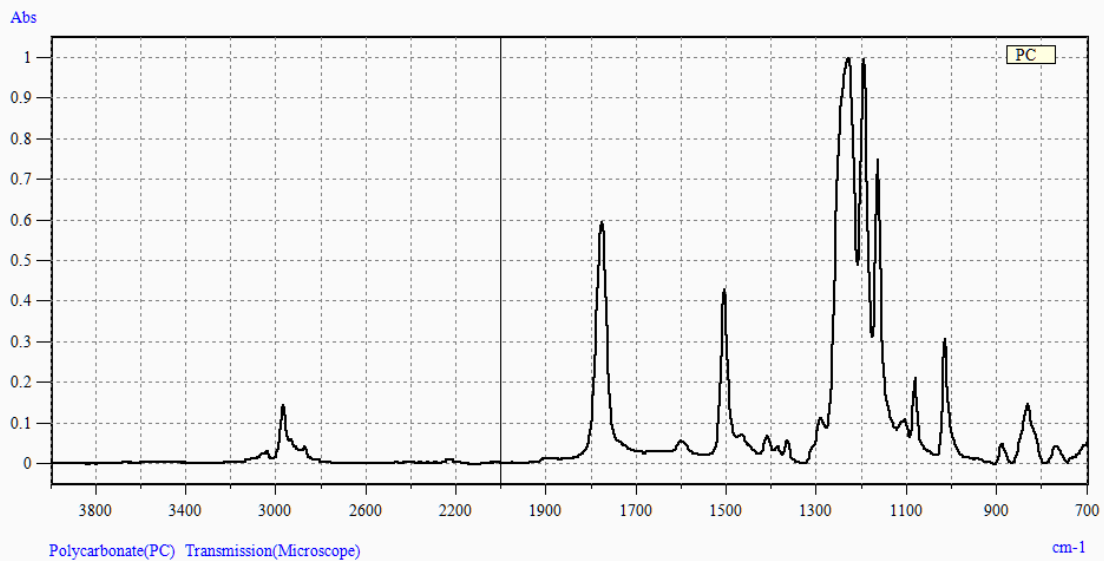

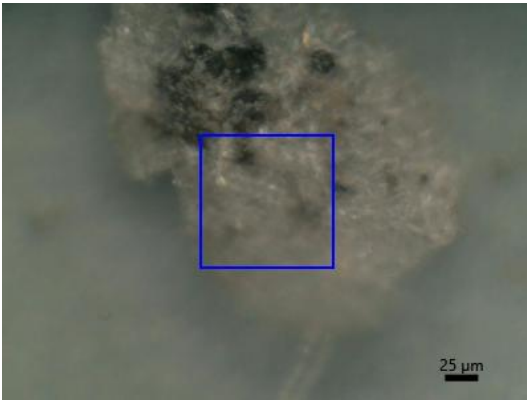

## Search Result Report

Filename : C:\Users\User\Desktop\UTSA samples\UV042821HA04\Point  
 Measurement\_Fragment\_111222\_34.apit  
 Acquired Datetime : 2022/11/12 14:55:18

### ● Search Parameters

Library list :  
 IRs Polymer2  
 ATR-Polymer2  
 T-Polymer2  
 Maximum hits: 200  
 Minimum quality : 0  
 Algorithm : DiffDeriv

| Score | Library      | Name | Comment                          |
|-------|--------------|------|----------------------------------|
| 702   | ATR-Polymer2 | D_PC | Polycarbonate(PC) DuraSamplIR-II |

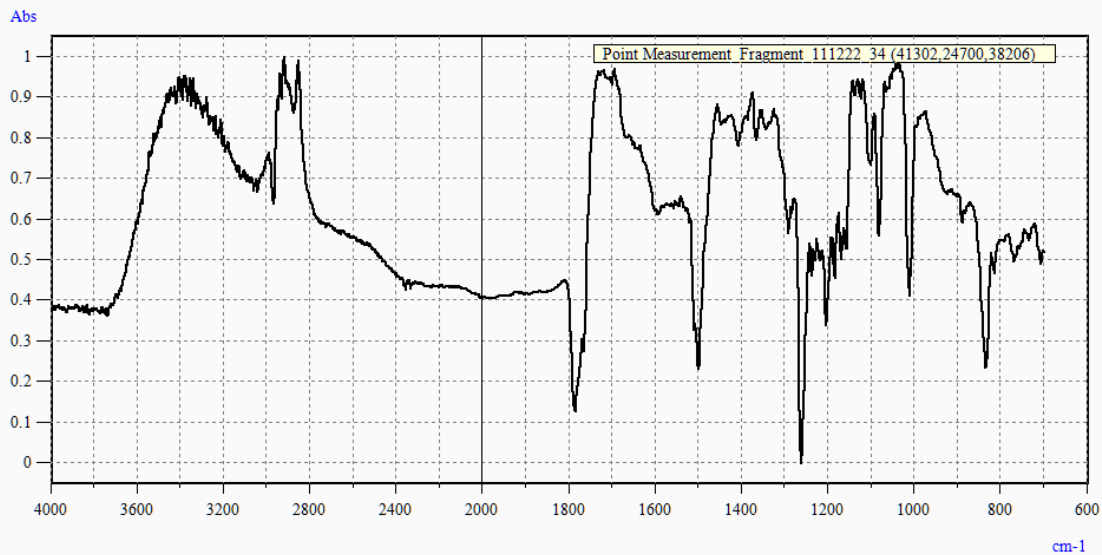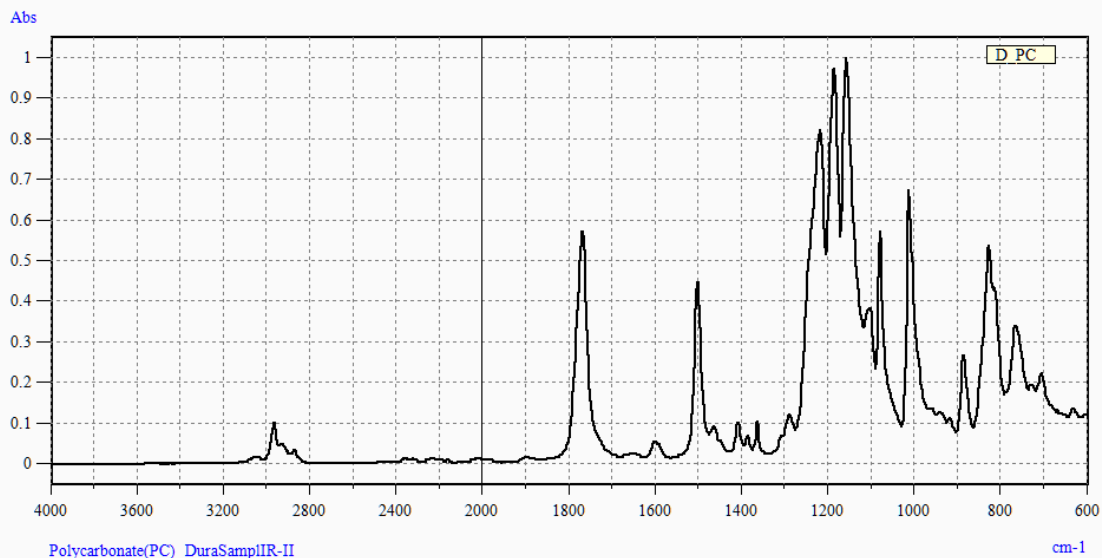

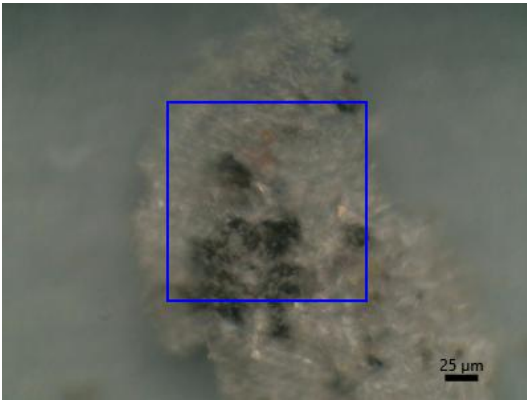

## Search Result Report

Filename : C:\Users\User\Desktop\UTSA samples\UV042821HA04\Point  
 Measurement\_Fragment\_111222\_35.apit  
 Acquired Datetime : 2022/11/12 14:59:11

### ● Search Parameters

Library list :  
 IRs Polymer2  
 ATR-Polymer2  
 T-Polymer2  
 Maximum hits: 200  
 Minimum quality : 0  
 Algorithm : DiffDeriv

| Score | Library      | Name | Comment                                      |
|-------|--------------|------|----------------------------------------------|
| 664   | IRs Polymer2 | PC   | Polycarbonate/CD-ROMATR/diamond ATRcorrected |

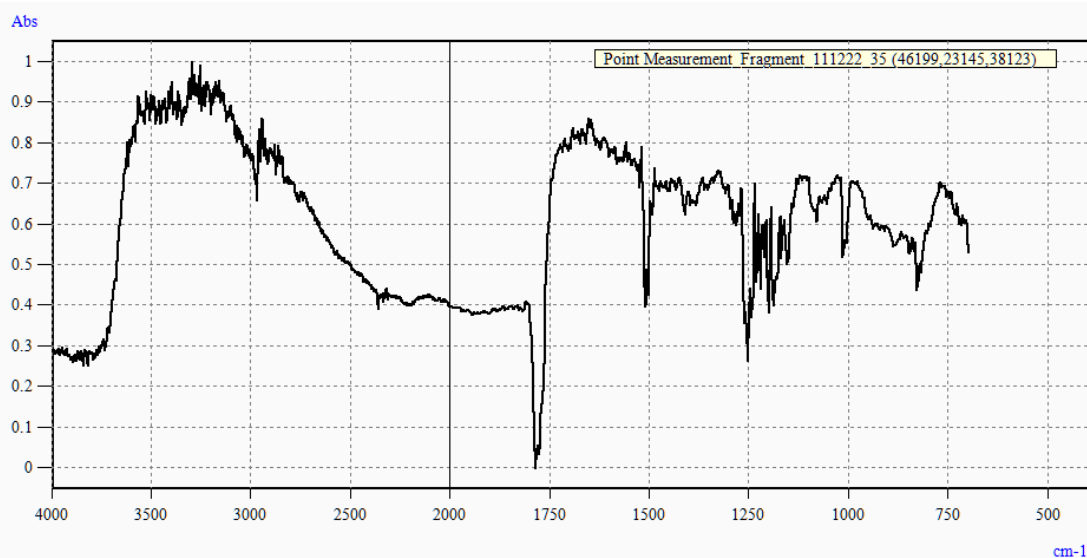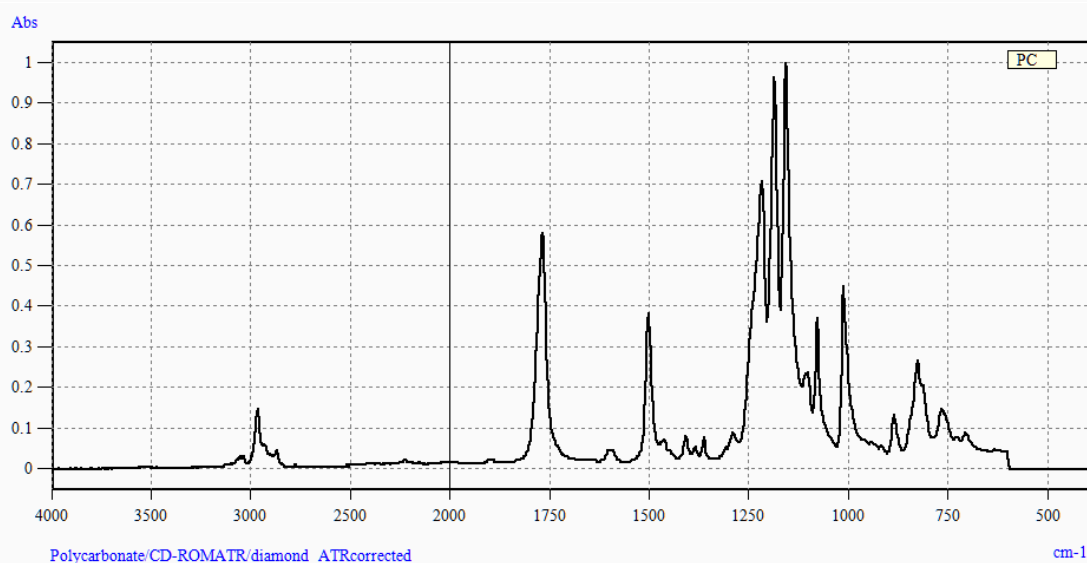

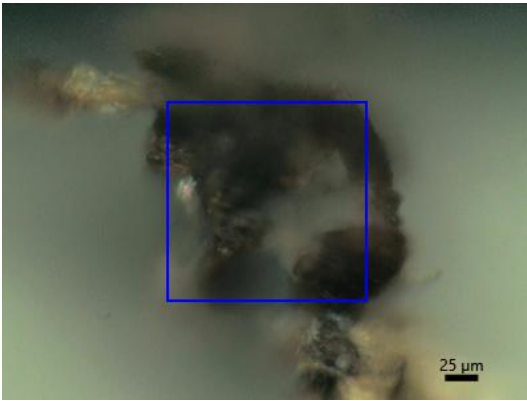

## Search Result Report

Filename : C:\Users\User\Desktop\UTSA samples\UV042821HA04\Point  
 Measurement\_Fragment\_111222\_36.apit  
 Acquired Datetime : 2022/11/12 15:02:43

### ● Search Parameters

Library list :  
 IRs Polymer2  
 ATR-Polymer2  
 T-Polymer2  
 Maximum hits: 200  
 Minimum quality : 0  
 Algorithm : DiffDeriv

| Score | Library    | Name | Comment                                       |
|-------|------------|------|-----------------------------------------------|
| 660   | T-Polymer2 | PC   | Polycarbonate(PC)<br>Transmission(Microscope) |

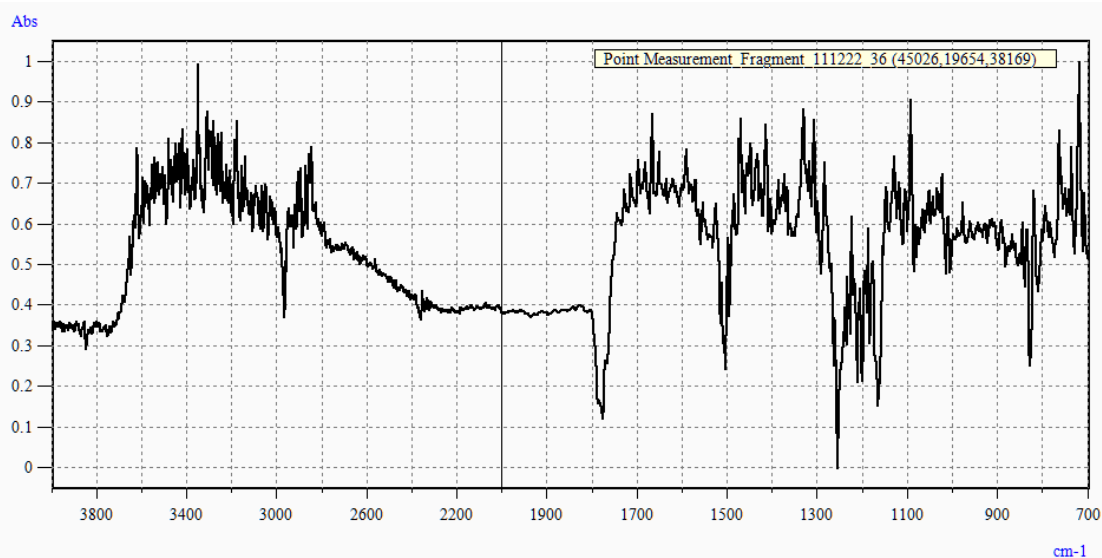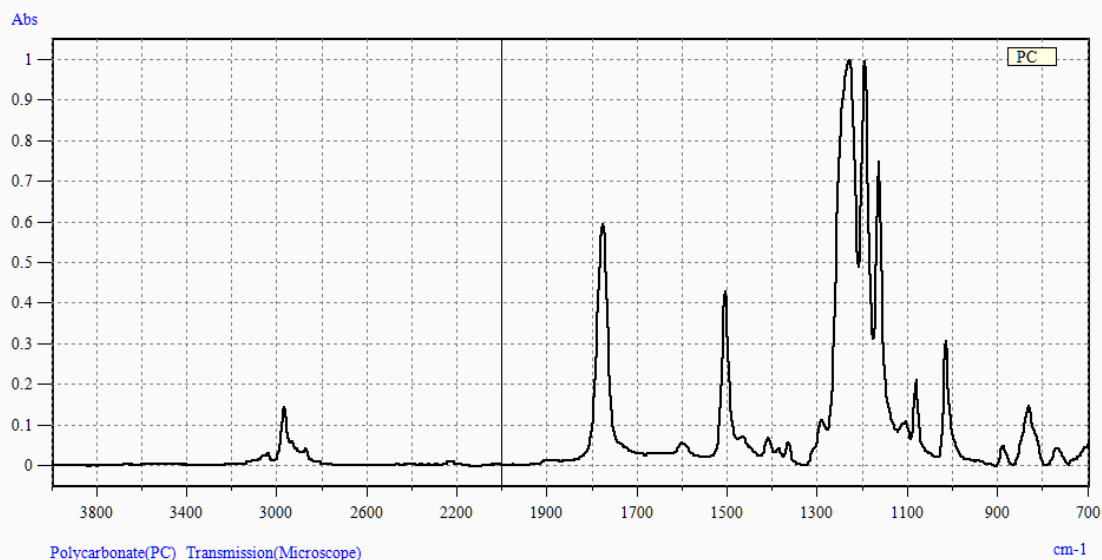

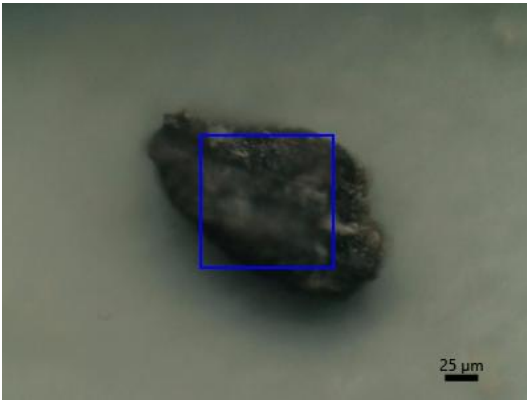

## Search Result Report

Filename : C:\Users\User\Desktop\UTSA samples\UV042821HA04\Point  
 Measurement\_Fragment\_111222\_37.apit  
 Acquired Datetime : 2022/11/12 15:05:13

### ● Search Parameters

Library list :  
 IRs Polymer2  
 ATR-Polymer2  
 T-Polymer2  
 Maximum hits: 200  
 Minimum quality : 0  
 Algorithm : DiffDeriv

| Score | Library      | Name    | Comment                                 |
|-------|--------------|---------|-----------------------------------------|
| 619   | IRs Polymer2 | MELAMIN | Melamin FormATR/diamond<br>ATRcorrected |

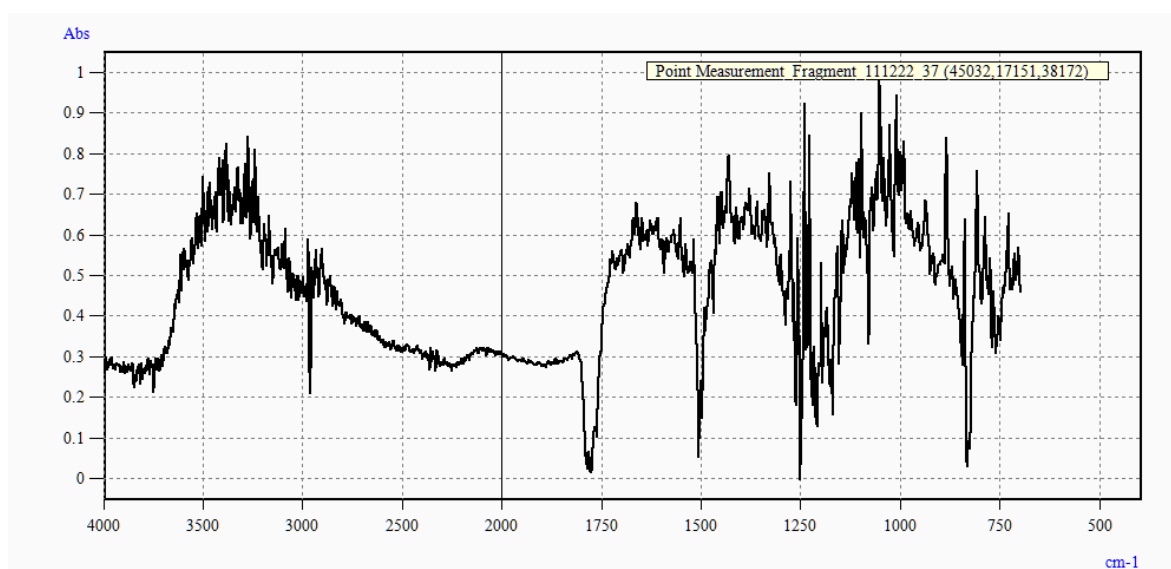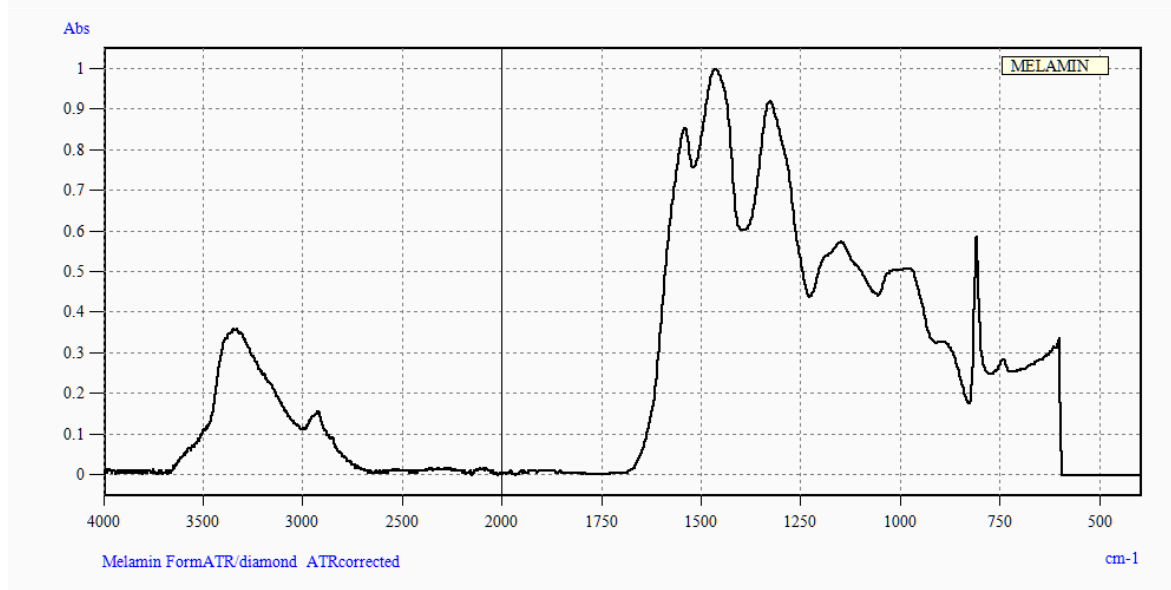

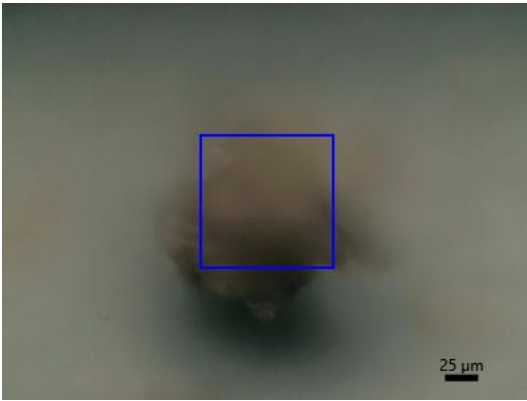

## Search Result Report

Filename : C:\Users\User\Desktop\UTSA samples\UV042821HA04\Point  
 Measurement\_Fragment\_111222\_38.apit  
 Acquired Datetime : 2022/11/12 15:09:36

### ● Search Parameters

Library list :  
 IRs Polymer2  
 ATR-Polymer2  
 T-Polymer2  
 Maximum hits: 200  
 Minimum quality : 0  
 Algorithm : DiffDeriv

| Score | Library    | Name | Comment                                       |
|-------|------------|------|-----------------------------------------------|
| 642   | T-Polymer2 | PC   | Polycarbonate(PC)<br>Transmission(Microscope) |

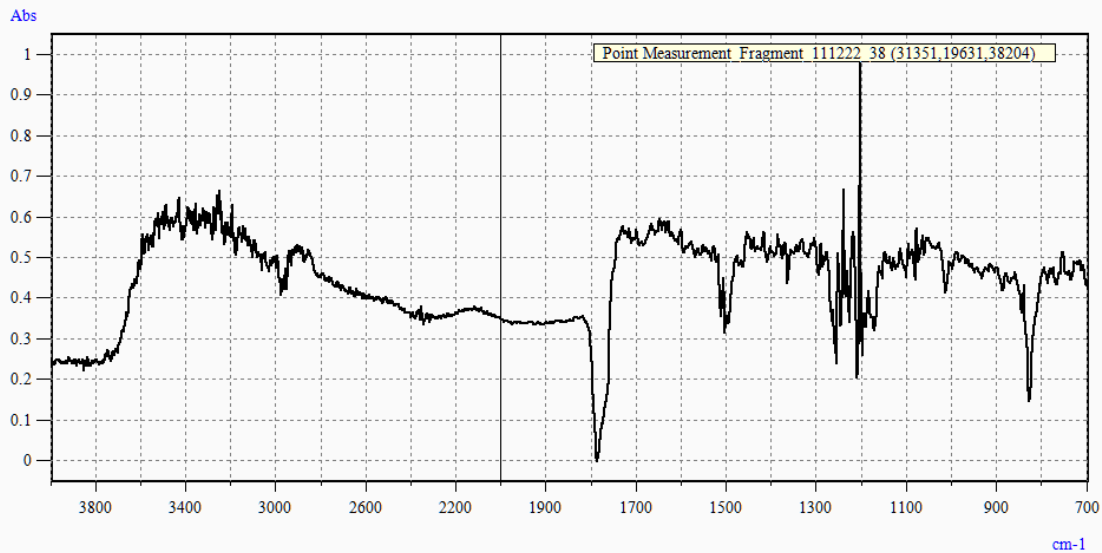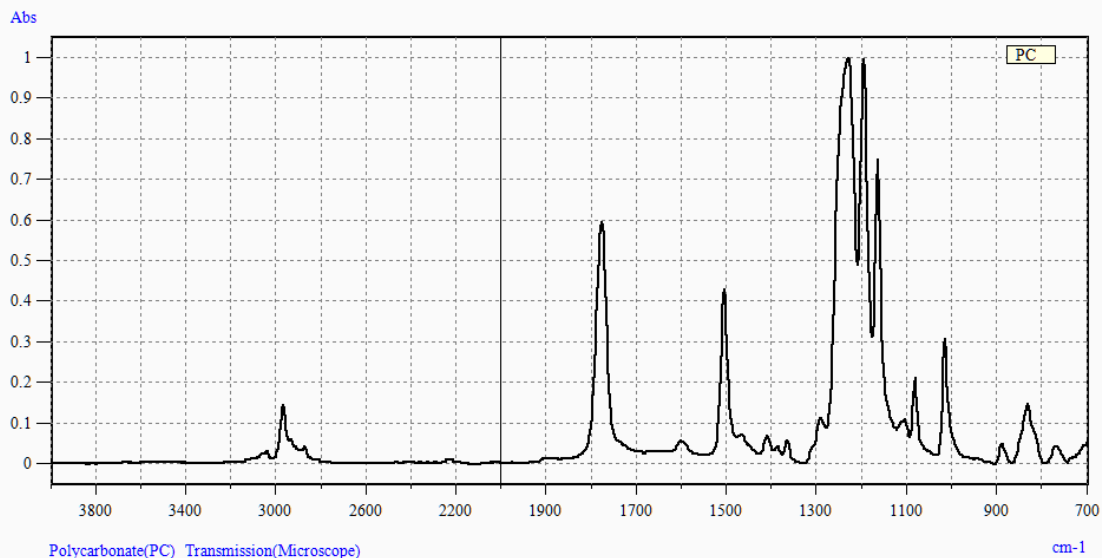

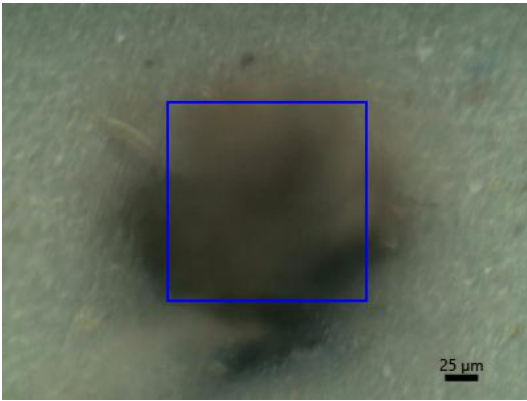

## Search Result Report

Filename : C:\Users\User\Desktop\UTSA samples\UV042821HA04\Point  
 Measurement\_Fragment\_111222\_39.apit  
 Acquired Datetime : 2022/11/12 15:12:15

### ● Search Parameters

Library list :  
 IRs Polymer2  
 ATR-Polymer2  
 T-Polymer2  
 Maximum hits: 200  
 Minimum quality : 0  
 Algorithm : DiffDeriv

| Score | Library    | Name | Comment                                       |
|-------|------------|------|-----------------------------------------------|
| 637   | T-Polymer2 | PC   | Polycarbonate(PC)<br>Transmission(Microscope) |

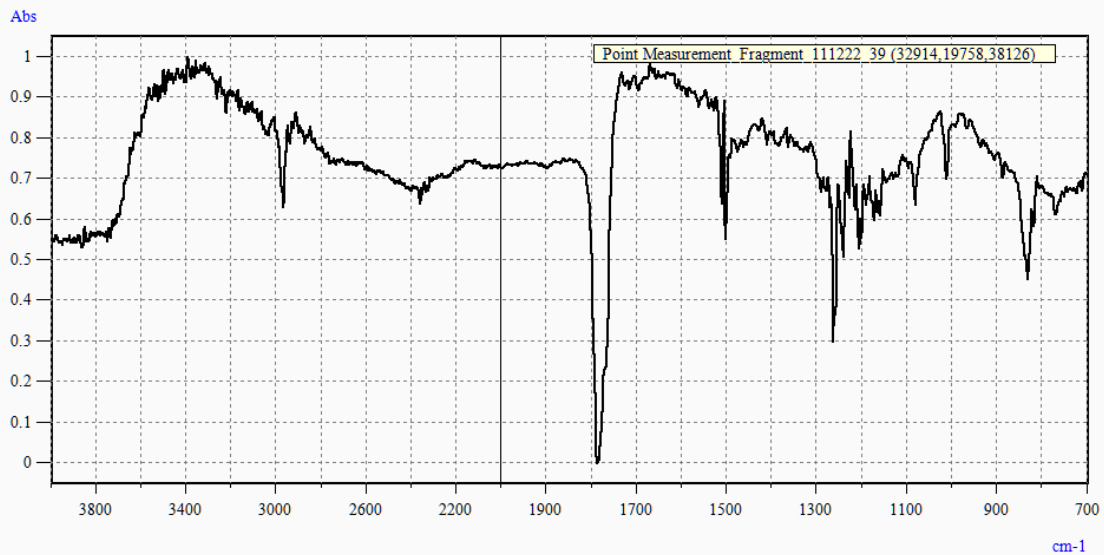

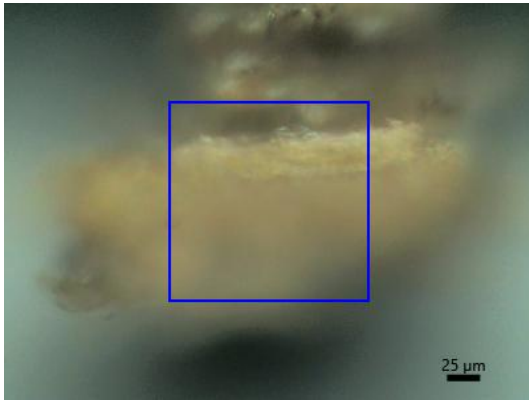

## Search Result Report

Filename : C:\Users\User\Desktop\UTSA samples\UV042821HA04\Point  
 Measurement\_Fragment\_111222\_40.apit  
 Acquired Datetime : 2022/11/12 15:15:33

### ● Search Parameters

Library list :  
 IRs Polymer2  
 ATR-Polymer2  
 T-Polymer2  
 Maximum hits: 200  
 Minimum quality : 0  
 Algorithm : DiffDeriv

| Score | Library    | Name | Comment                                       |
|-------|------------|------|-----------------------------------------------|
| 629   | T-Polymer2 | PC   | Polycarbonate(PC)<br>Transmission(Microscope) |

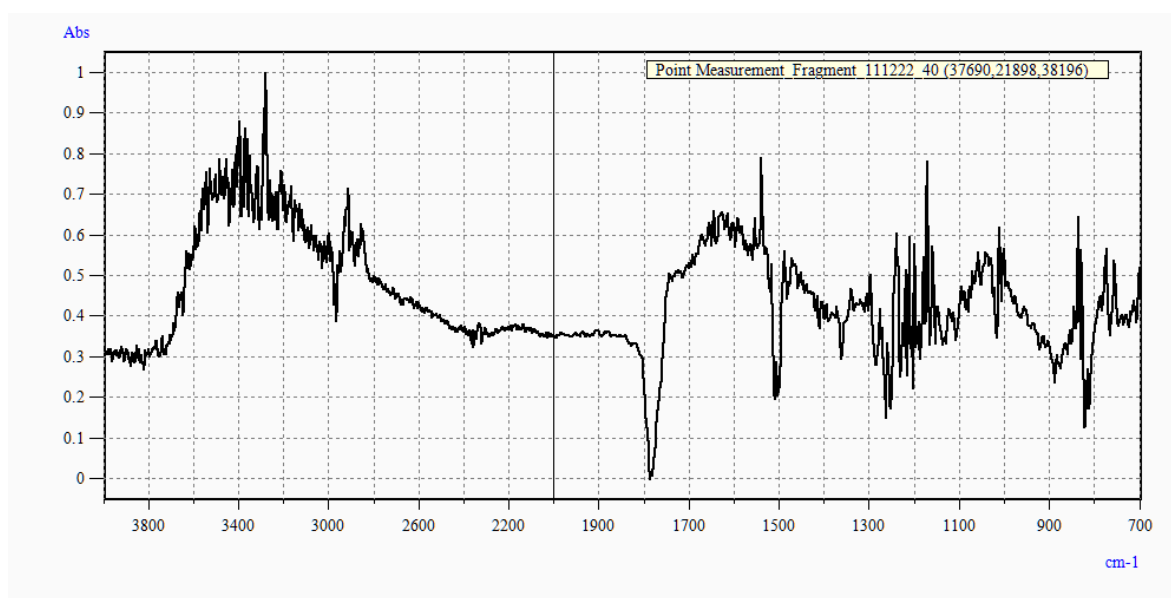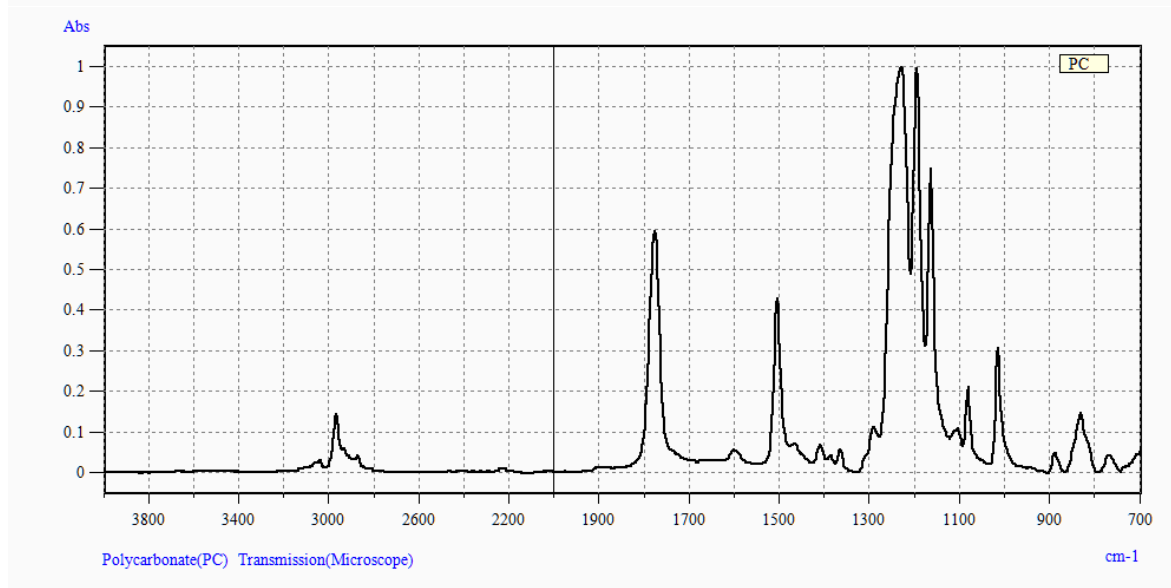

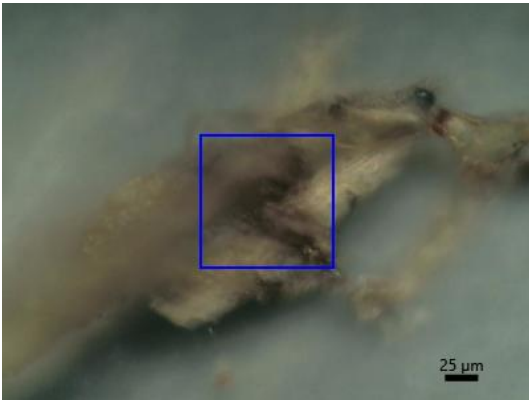

## Search Result Report

Filename : C:\Users\User\Desktop\UTSA samples\UV042821HA04\Point  
 Measurement\_Fragment\_111222\_41.apit  
 Acquired Datetime : 2022/11/12 15:17:51

### ● Search Parameters

Library list :  
 IRs Polymer2  
 ATR-Polymer2  
 T-Polymer2  
 Maximum hits: 200  
 Minimum quality : 0  
 Algorithm : DiffDeriv

| Score | Library      | Name | Comment                          |
|-------|--------------|------|----------------------------------|
| 641   | ATR-Polymer2 | D_PC | Polycarbonate(PC) DuraSamplIR-II |

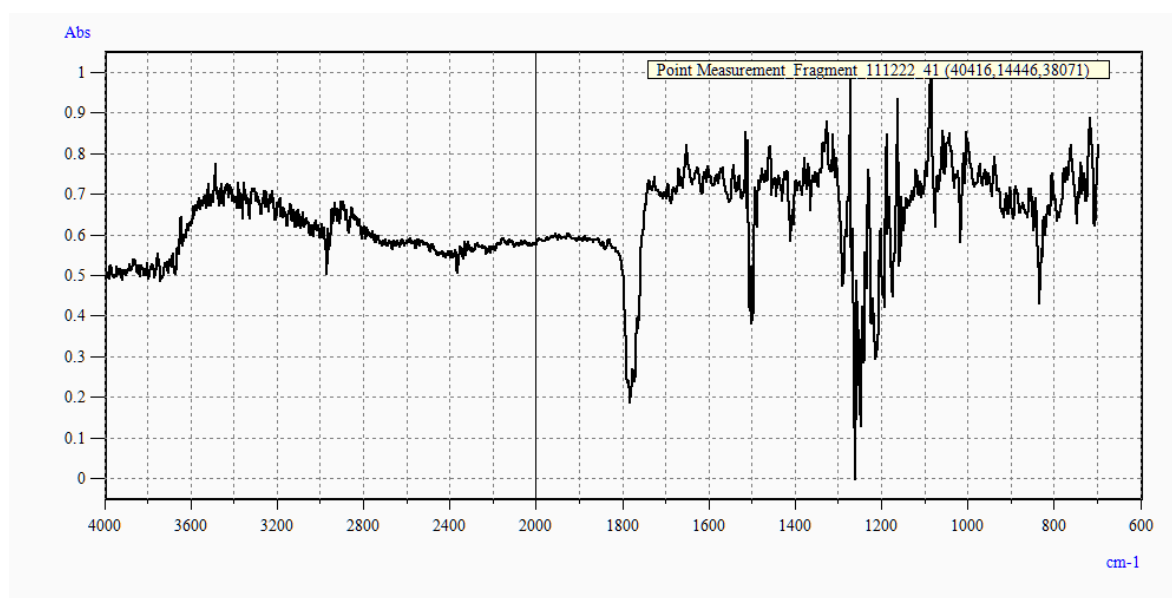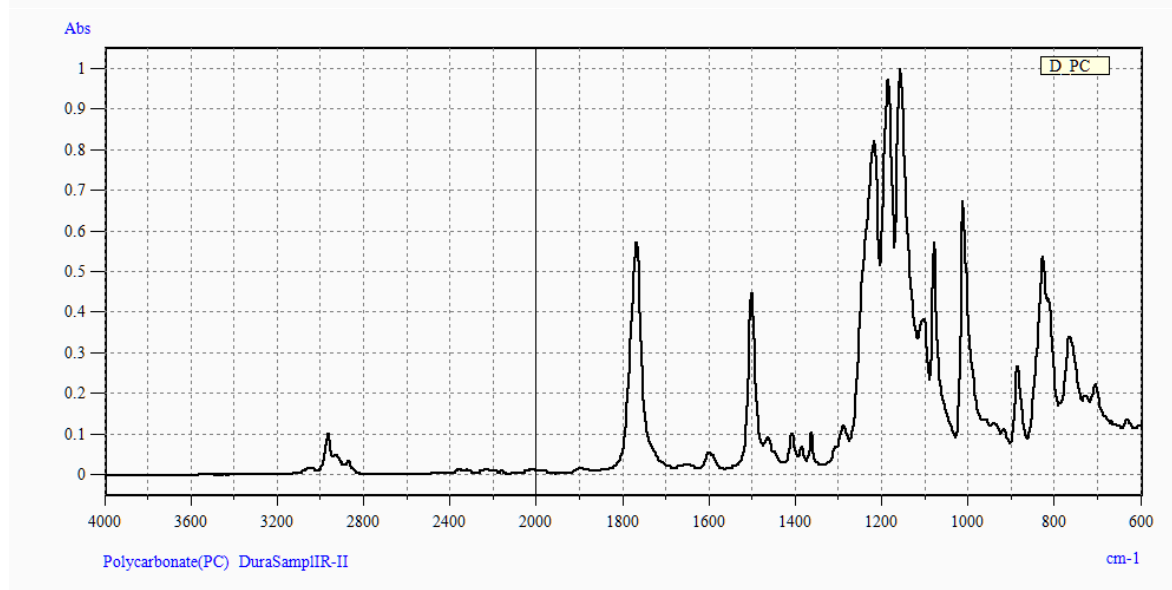

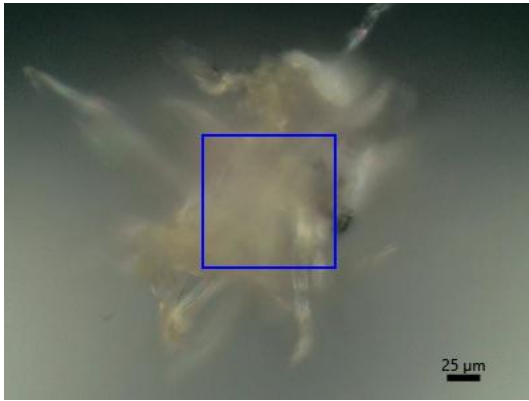

## Search Result Report

Filename : C:\Users\User\Desktop\UTSA samples\UV042821HA04\Point  
 Measurement\_Fragment\_111222\_42.apit  
 Acquired Datetime : 2022/11/12 15:21:21

● **Search Parameters**

Library list :  
 IRs Polymer2  
 ATR-Polymer2  
 T-Polymer2  
 Maximum hits: 200  
 Minimum quality : 0  
 Algorithm : DiffDeriv

| Score | Library    | Name  | Comment                        |
|-------|------------|-------|--------------------------------|
| 652   | T-Polymer2 | Ramie | Ramie Transmission(Microscope) |

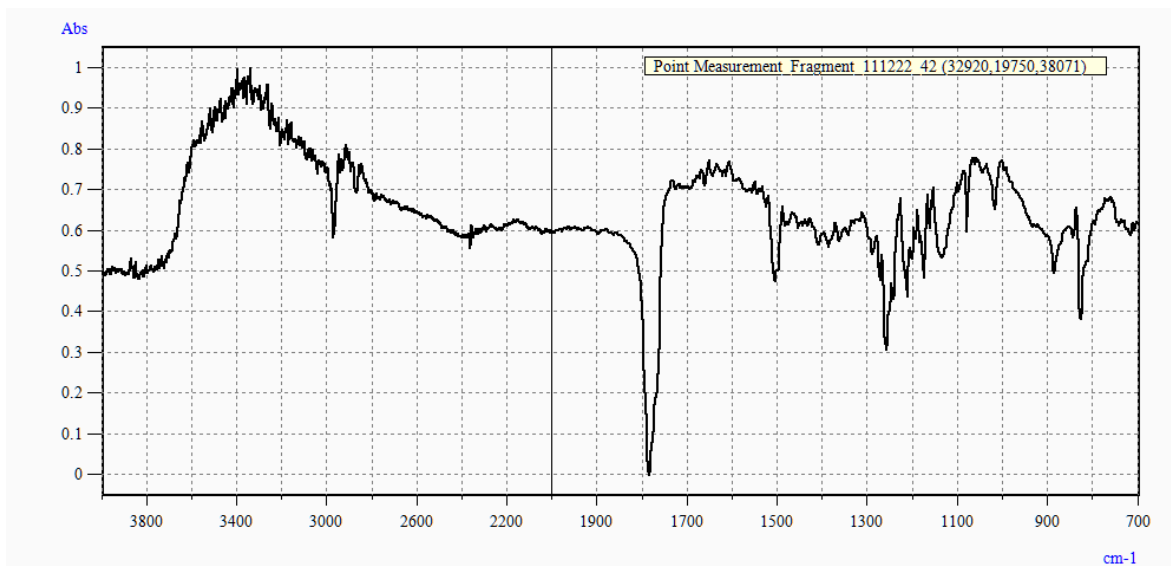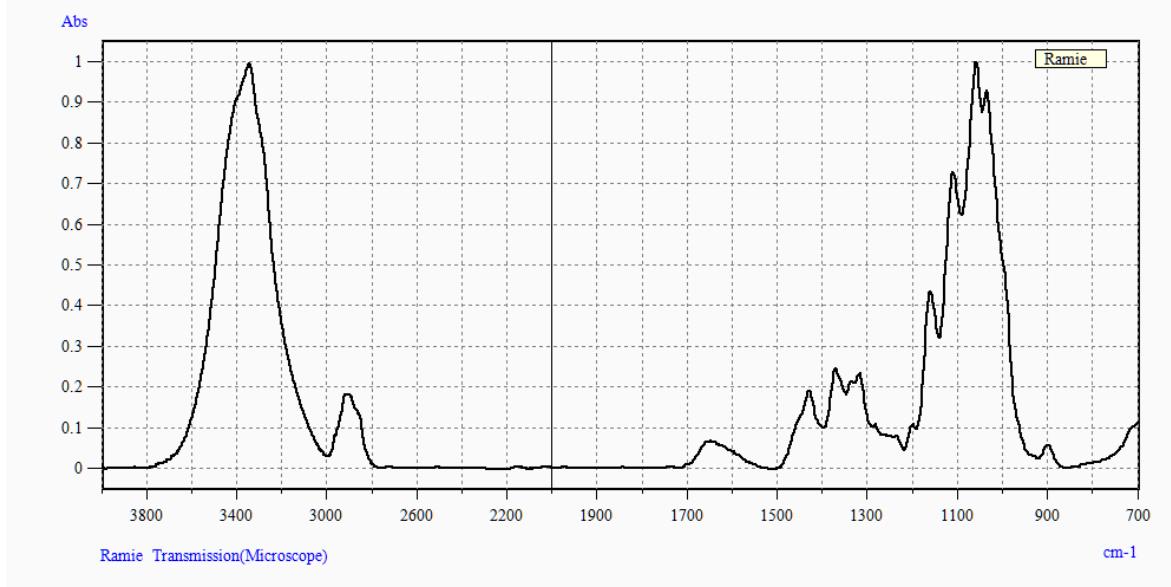

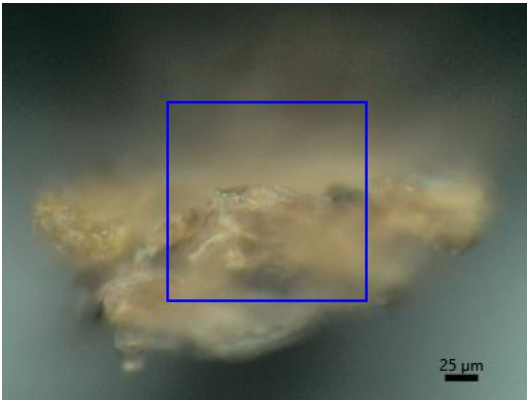

# Search Result Report

Filename : C:\Users\User\Desktop\UTSA samples\UV042821HA04\Point  
 Measurement\_Fragment\_111222\_43.apit  
 Acquired Datetime : 2022/11/12 15:28:27

● **Search Parameters**

Library list :  
 IRs Polymer2  
 ATR-Polymer2  
 T-Polymer2  
 Maximum hits: 200  
 Minimum quality : 0  
 Algorithm : DiffDeriv

| Score | Library      | Name                 | Comment                                     |
|-------|--------------|----------------------|---------------------------------------------|
| 584   | ATR-Polymer2 | D_Polyethyleneglycol | Polyethylene Glycol 20000<br>DuraSamplIR-II |

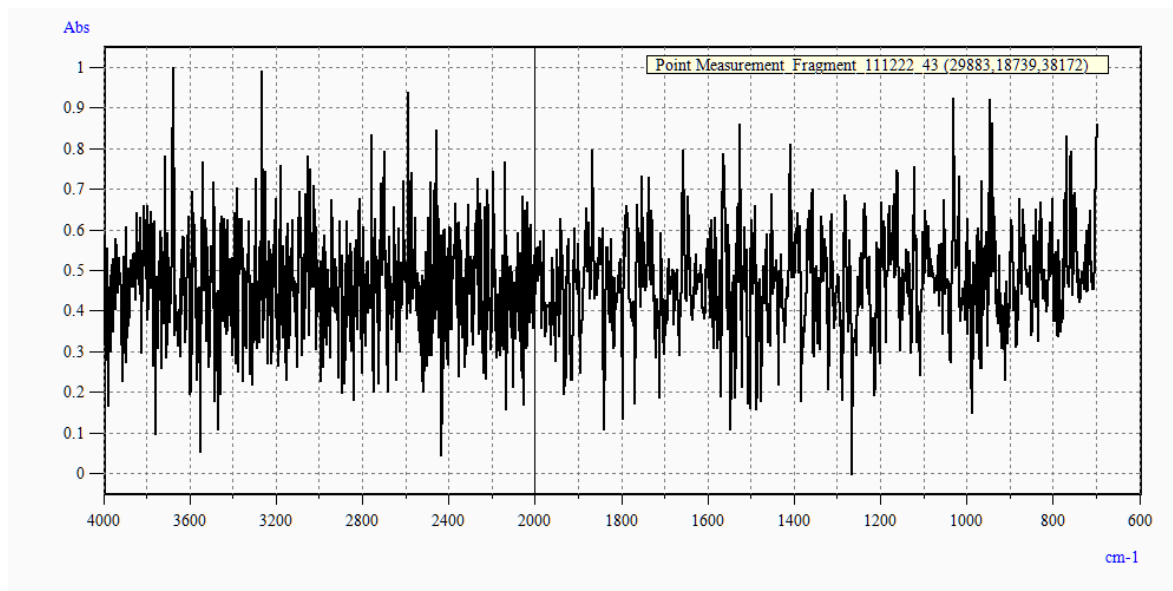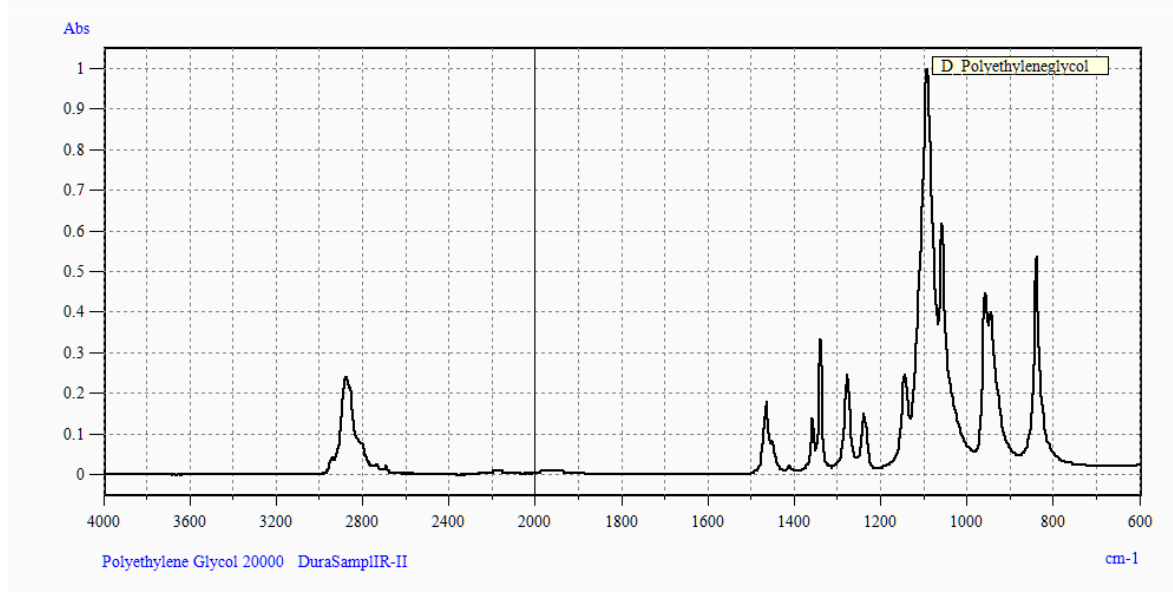

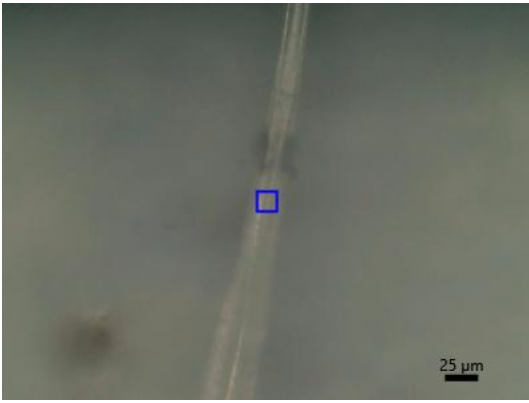

# Search Result Report

Filename : C:\Users\User\Desktop\UTSA samples\UV042821HA04\Point  
 Measurement\_Fragment\_111222\_44.apit  
 Acquired Datetime : 2022/11/12 15:34:41

● Search Parameters

Library list :  
 IRs Polymer2  
 ATR-Polymer2  
 T-Polymer2  
 Maximum hits: 200  
 Minimum quality : 0  
 Algorithm : DiffDeriv

| Score | Library      | Name | Comment                          |
|-------|--------------|------|----------------------------------|
| 677   | ATR-Polymer2 | D_PC | Polycarbonate(PC) DuraSamplIR-II |

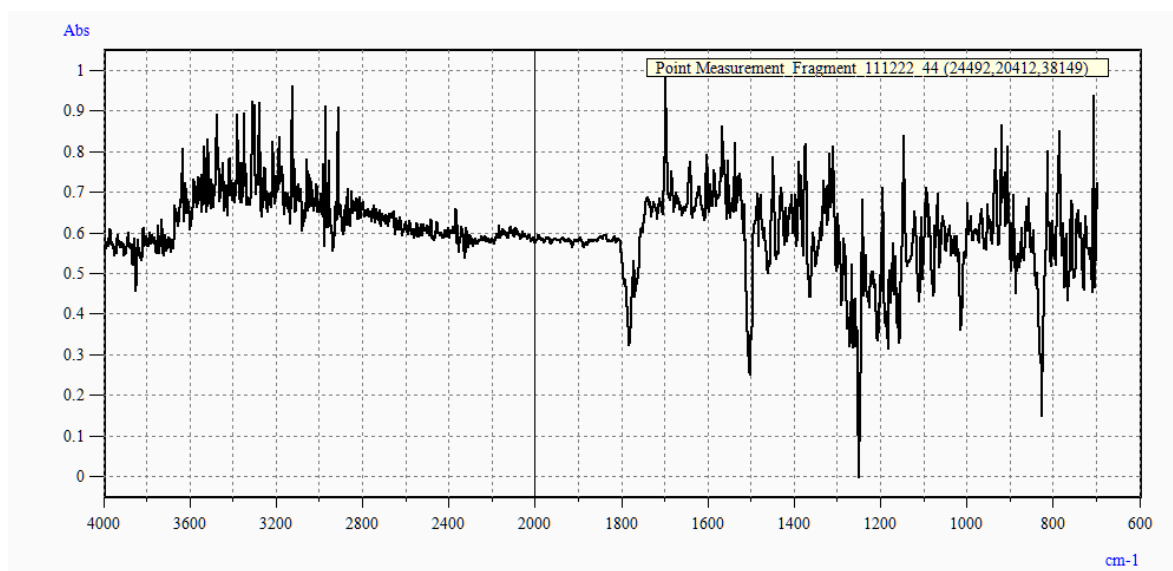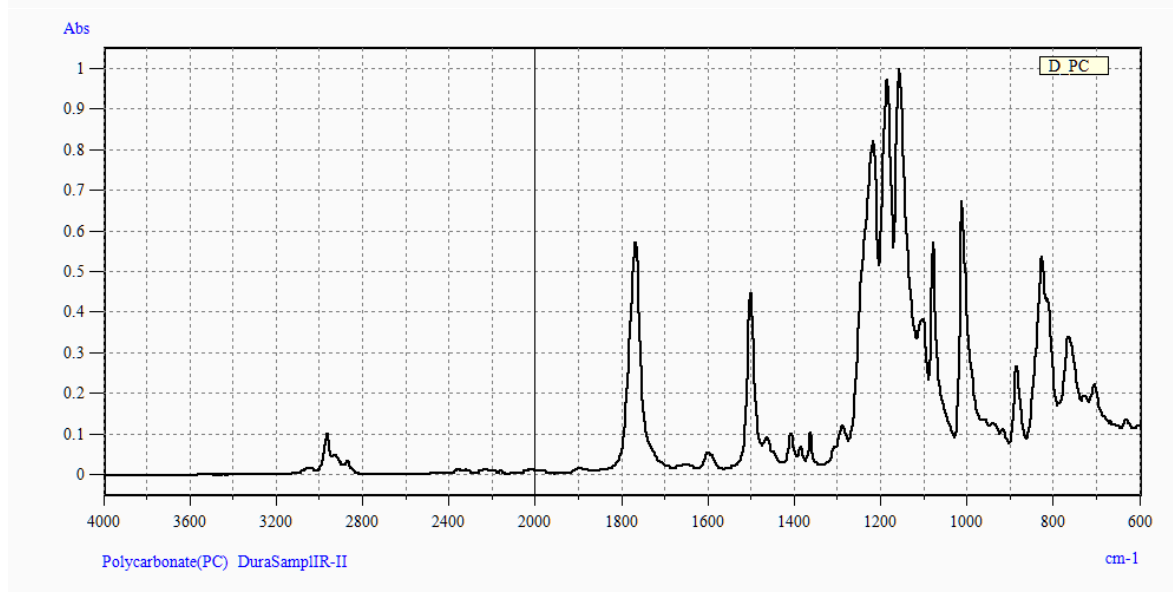

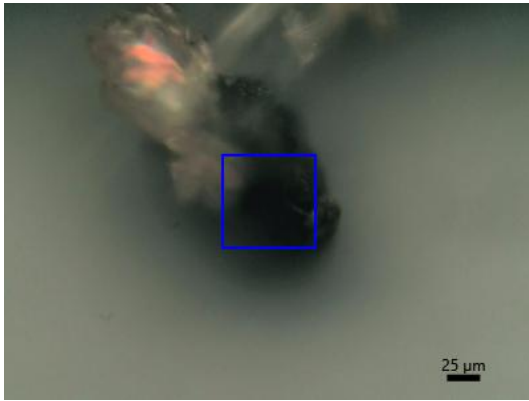

# Search Result Report

Filename : C:\Users\User\Desktop\UTSA samples\UV042821HA04\Point  
 Measurement\_Fragment\_111222\_45.apit  
 Acquired Datetime : 2022/11/12 15:39:57

● **Search Parameters**

Library list :  
 IRs Polymer2  
 ATR-Polymer2  
 T-Polymer2  
 Maximum hits: 200  
 Minimum quality : 0  
 Algorithm : DiffDeriv

| Score | Library    | Name | Comment                                       |
|-------|------------|------|-----------------------------------------------|
| 654   | T-Polymer2 | PC   | Polycarbonate(PC)<br>Transmission(Microscope) |

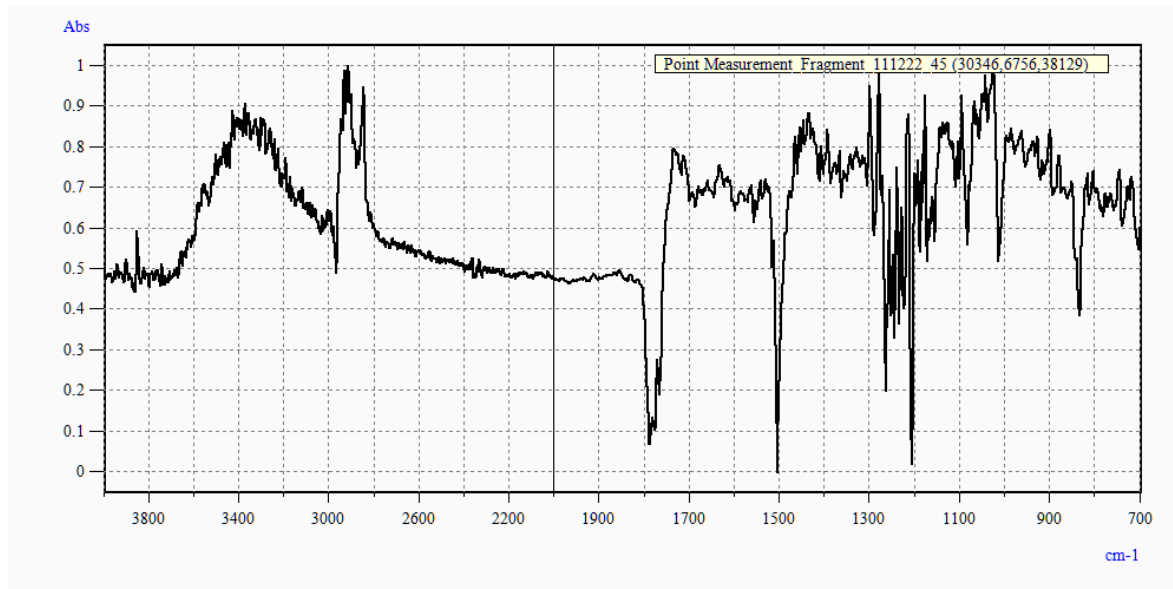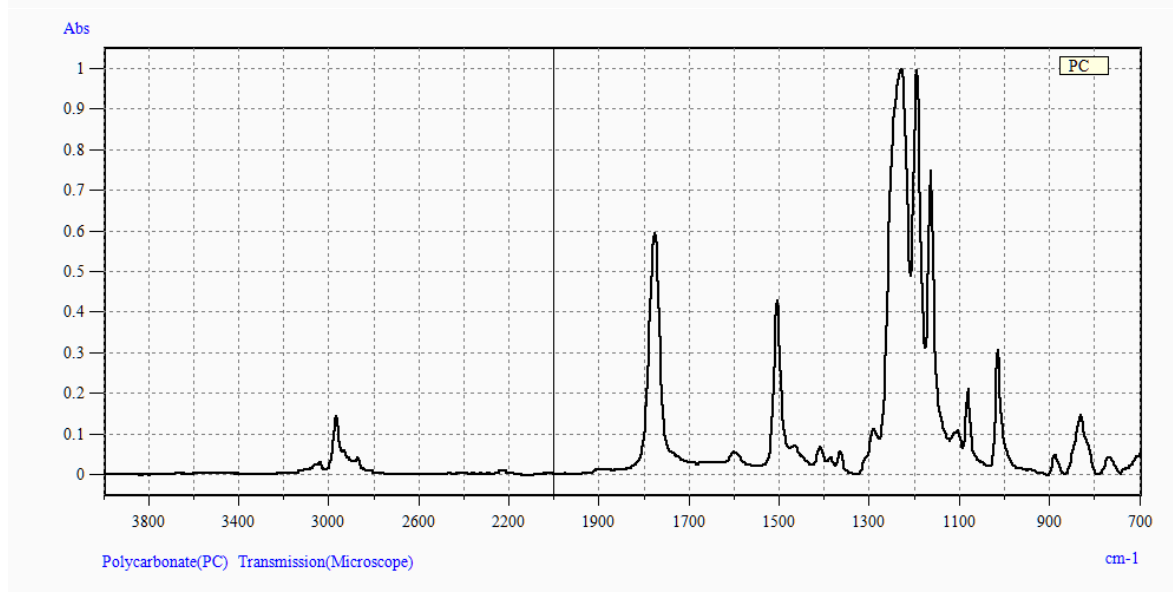

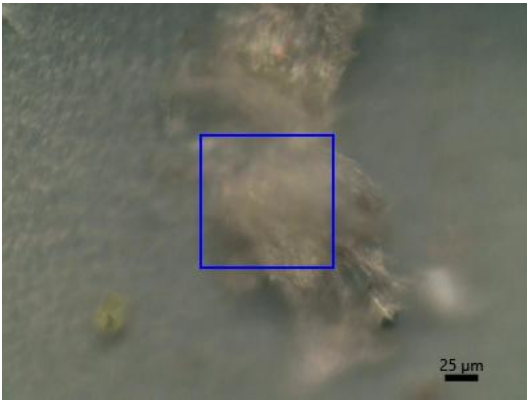

## Search Result Report

Filename : C:\Users\User\Desktop\UTSA samples\UV042821HA04\Point  
 Measurement\_Fragment\_111222\_46.apit  
 Acquired Datetime : 2022/11/12 15:42:23

### ● Search Parameters

Library list :  
 IRs Polymer2  
 ATR-Polymer2  
 T-Polymer2  
 Maximum hits: 200  
 Minimum quality : 0  
 Algorithm : DiffDeriv

| Score | Library    | Name | Comment                                       |
|-------|------------|------|-----------------------------------------------|
| 637   | T-Polymer2 | PC   | Polycarbonate(PC)<br>Transmission(Microscope) |

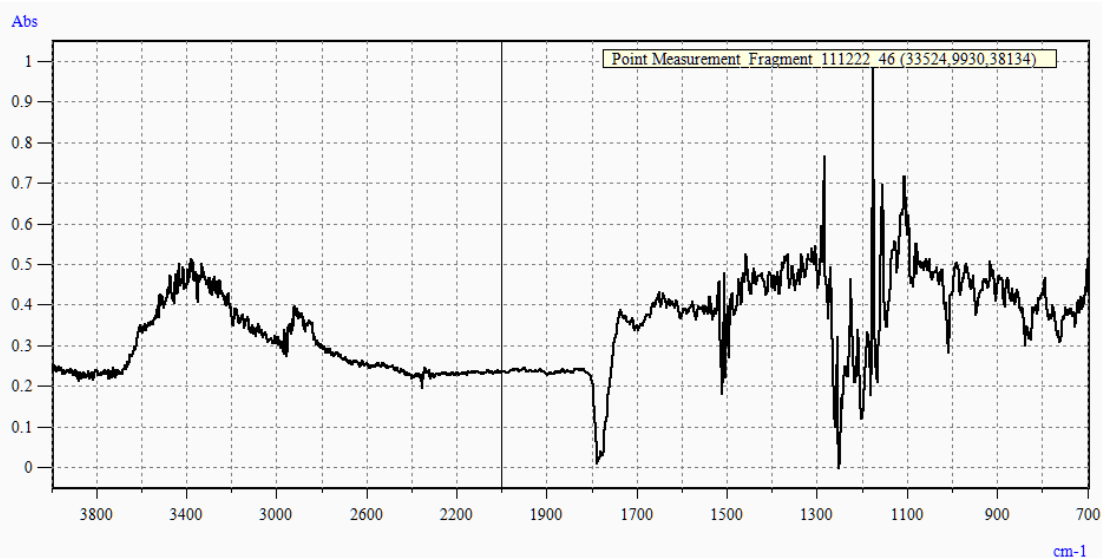

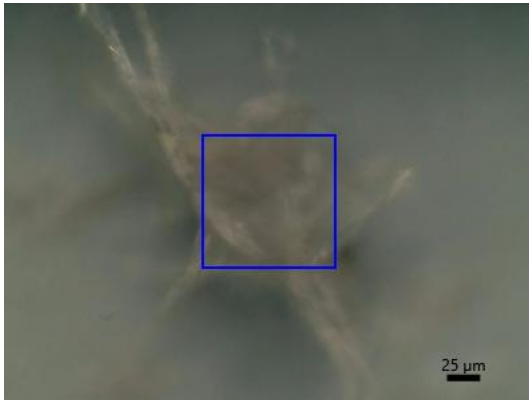

## Search Result Report

Filename : C:\Users\User\Desktop\UTSA samples\UV042821HA04\Point  
 Measurement\_Fragment\_111222\_47.apit  
 Acquired Datetime : 2022/11/12 15:45:10

### ● Search Parameters

Library list :  
 IRs Polymer2  
 ATR-Polymer2  
 T-Polymer2  
 Maximum hits: 200  
 Minimum quality : 0  
 Algorithm : DiffDeriv

| Score | Library    | Name | Comment                                                                      |
|-------|------------|------|------------------------------------------------------------------------------|
| 634   | T-Polymer2 | FEP  | Tetrafluoroethylene-<br>Hexafluoropropylene(FEP)<br>Transmission(Microscope) |

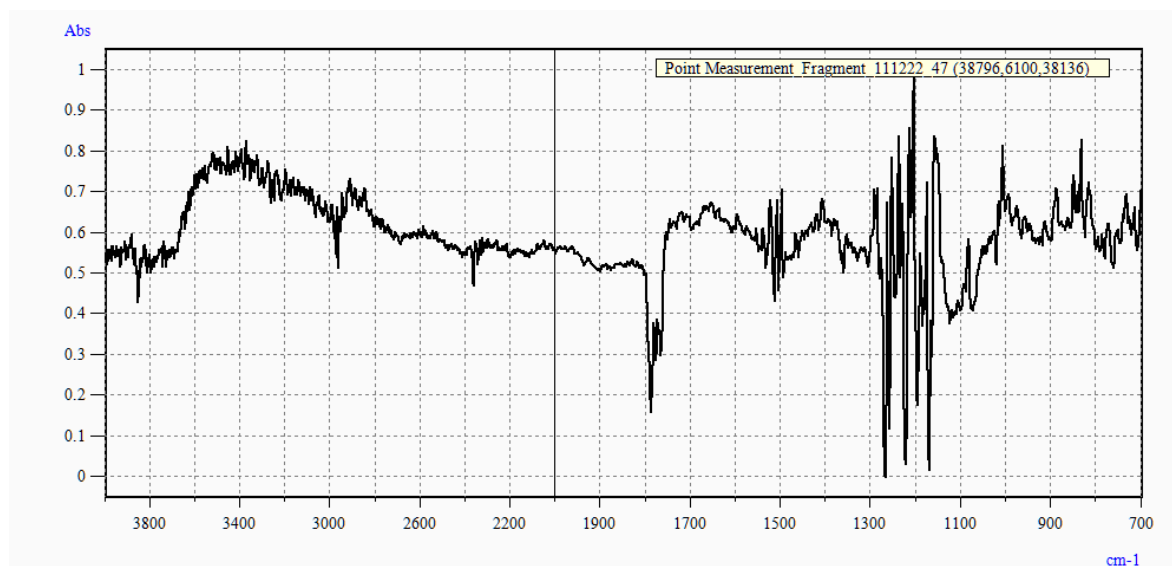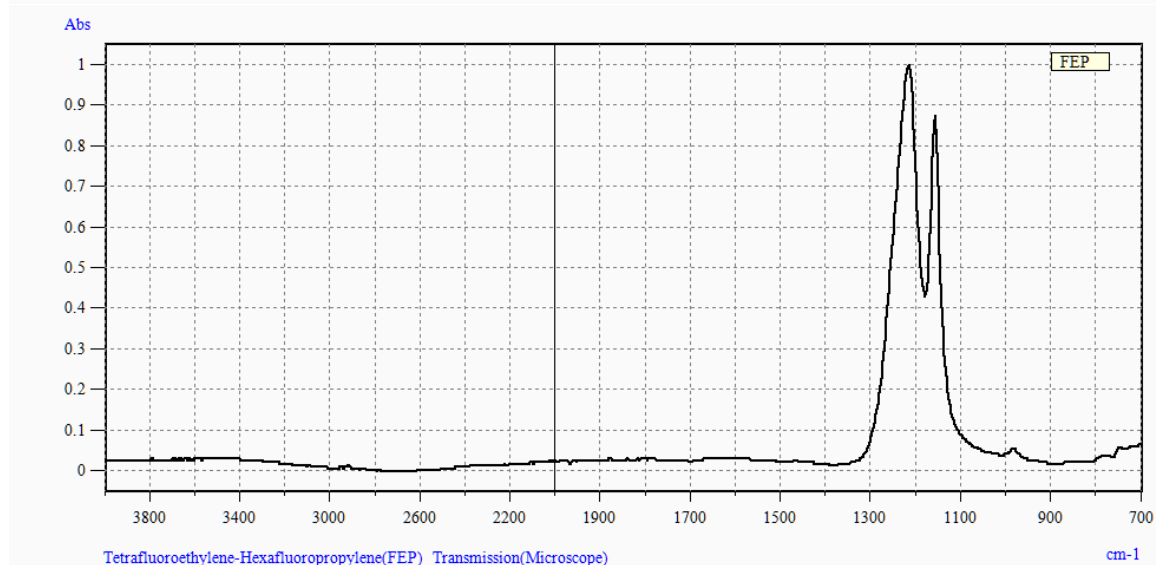

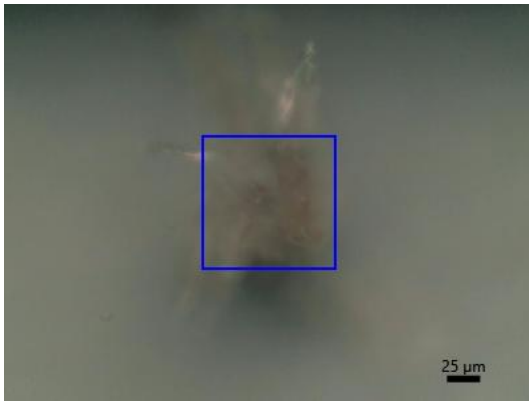

## Search Result Report

Filename : C:\Users\User\Desktop\UTSA samples\UV042821HA04\Point  
 Measurement\_Fragment\_111222\_48.apit  
 Acquired Datetime : 2022/11/12 15:50:20

### ● Search Parameters

Library list :  
 IRs Polymer2  
 ATR-Polymer2  
 T-Polymer2  
 Maximum hits: 200  
 Minimum quality : 0  
 Algorithm : DiffDeriv

| Score | Library      | Name                | Comment                          |
|-------|--------------|---------------------|----------------------------------|
| 581   | ATR-Polymer2 | D_1_2_Polybutadiene | 1,2-Polybutadiene DuraSamplIR-II |

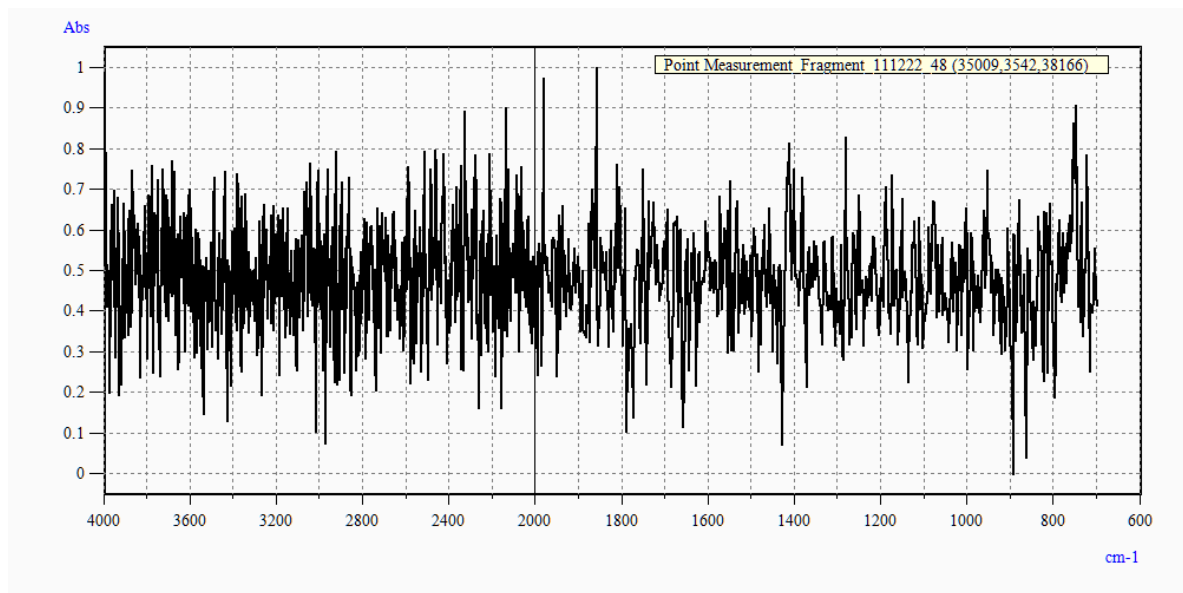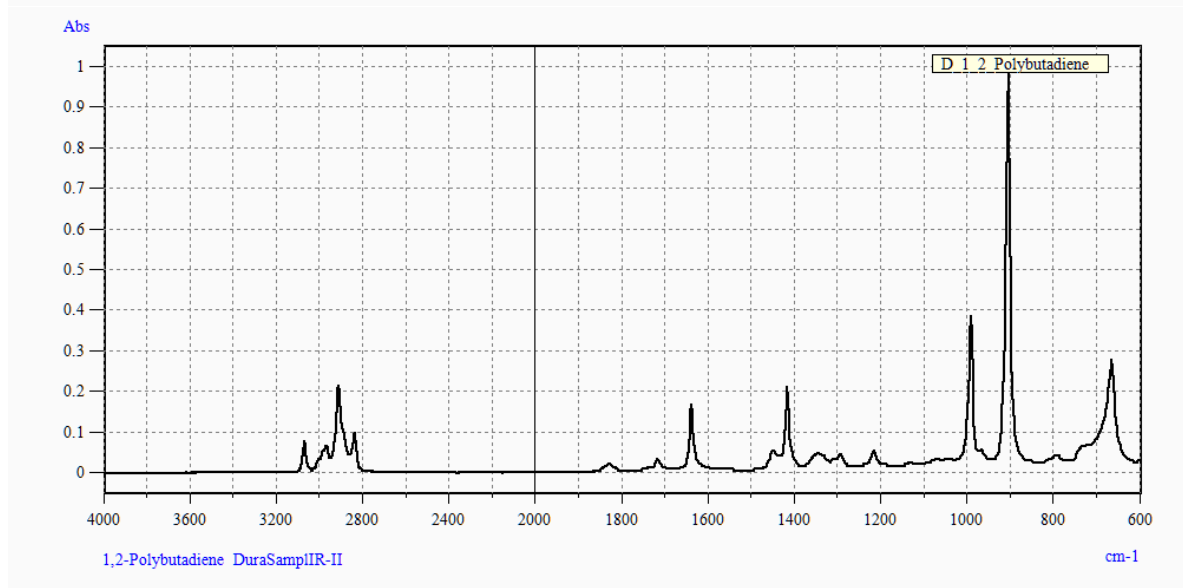

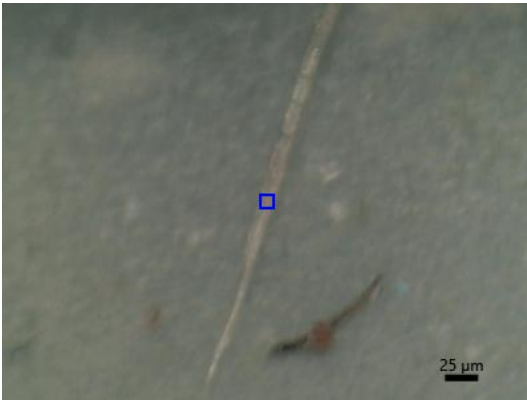

## Search Result Report

Filename : C:\Users\User\Desktop\UTSA samples\UV042821HA05\Point  
 Measurement\_fiber\_28.apit  
 Acquired Datetime : 2022/11/11 14:07:10

### ● Search Parameters

Library list :  
 IRs Polymer2  
 ATR-Polymer2  
 T-Polymer2  
 Maximum hits: 200  
 Minimum quality : 0  
 Algorithm : DiffDeriv

| Score | Library      | Name  | Comment                                      |
|-------|--------------|-------|----------------------------------------------|
| 607   | ATR-Polymer2 | D_PPS | Polyphenylene Sulfide(PPS)<br>DuraSamplIR-II |

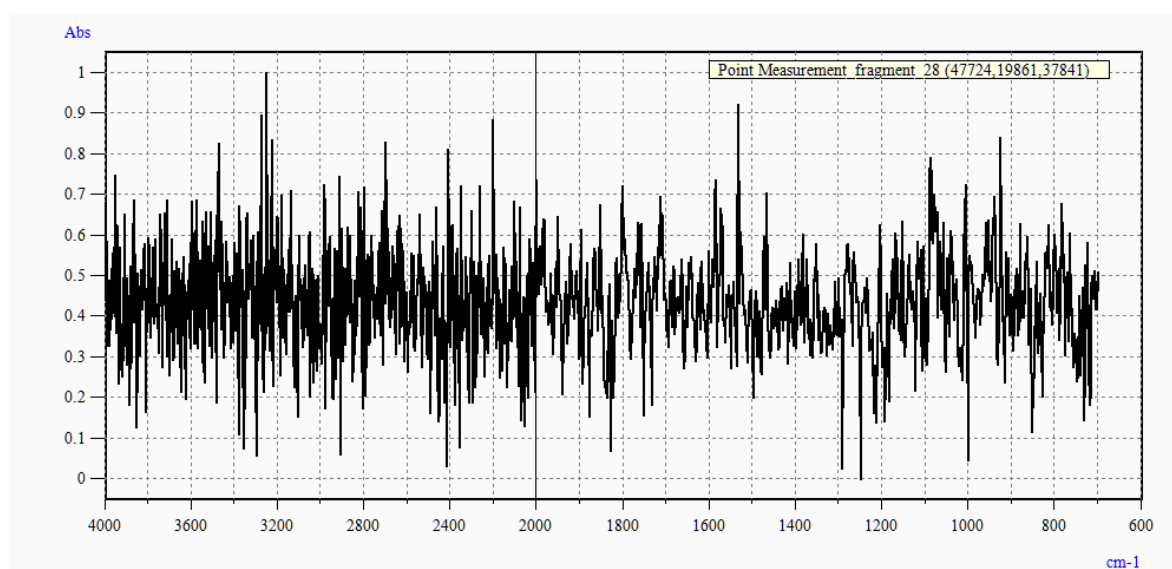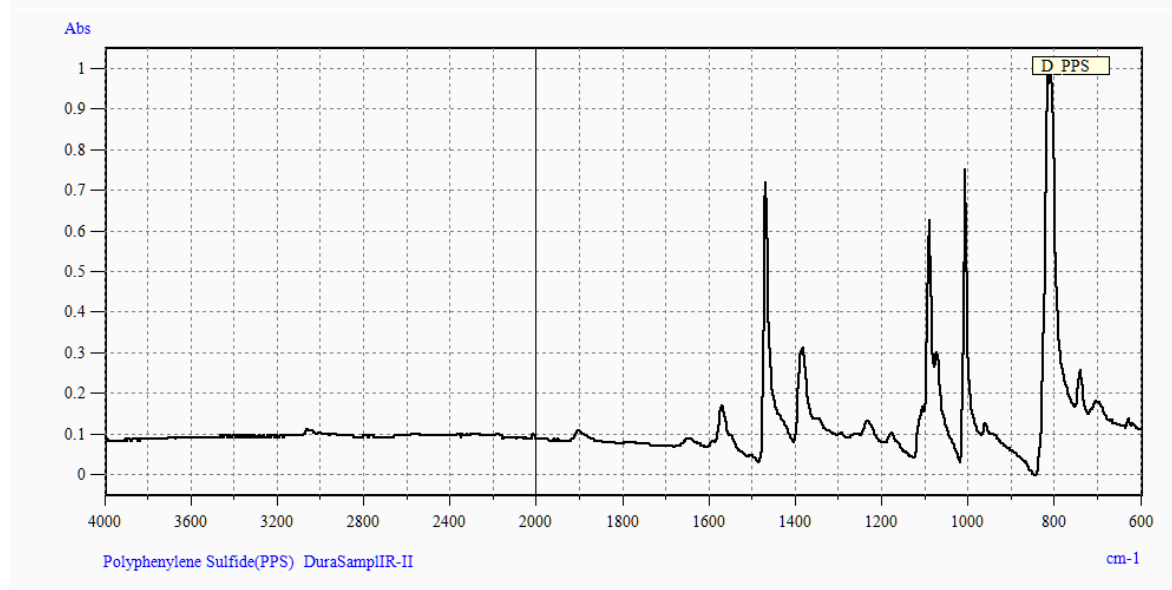

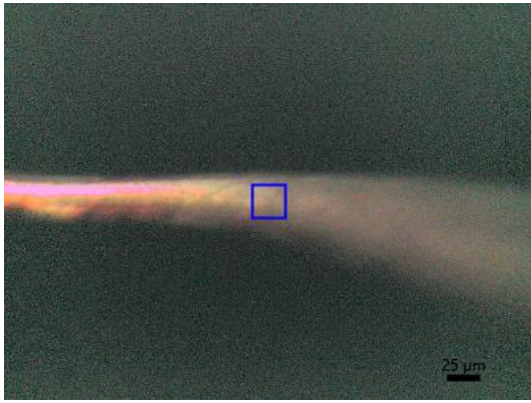

# Search Result Report

Filename : C:\Users\User\Desktop\UTSA samples\UV042821HA05\Point  
 Measurement\_fiber\_29.apit  
 Acquired Datetime : 2022/11/11 14:16:01

● **Search Parameters**

Library list :  
 IRs Polymer2  
 ATR-Polymer2  
 T-Polymer2  
 Maximum hits: 200  
 Minimum quality : 0  
 Algorithm : DiffDeriv

| Score | Library    | Name | Comment                                               |
|-------|------------|------|-------------------------------------------------------|
| 579   | T-Polymer2 | PPS  | Polyphenylene Sulfie(PPS)<br>Transmission(Microscope) |

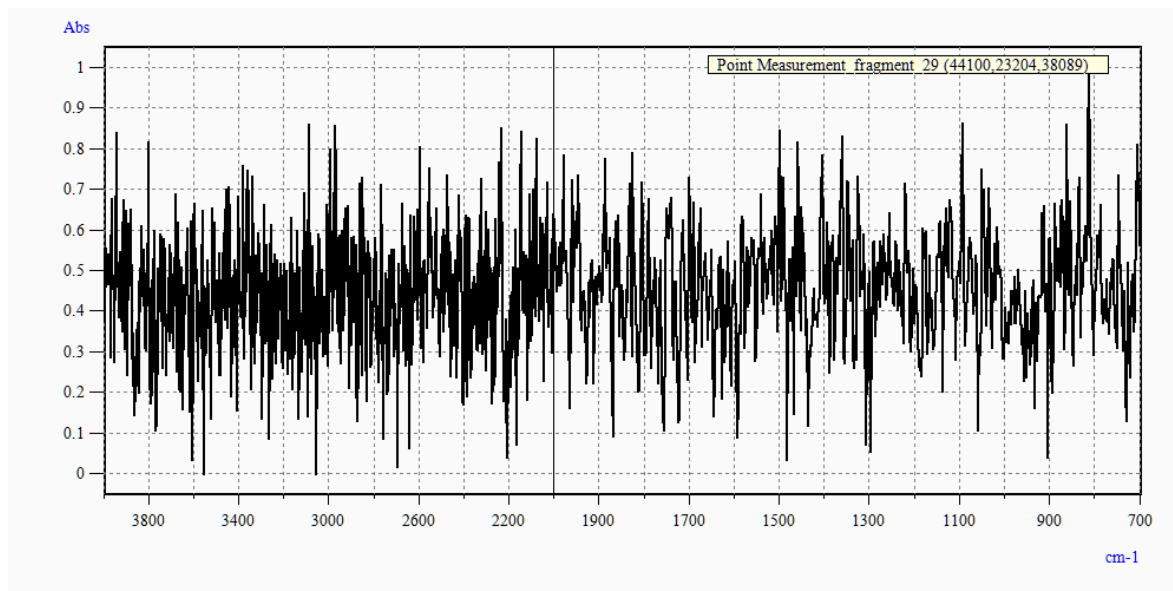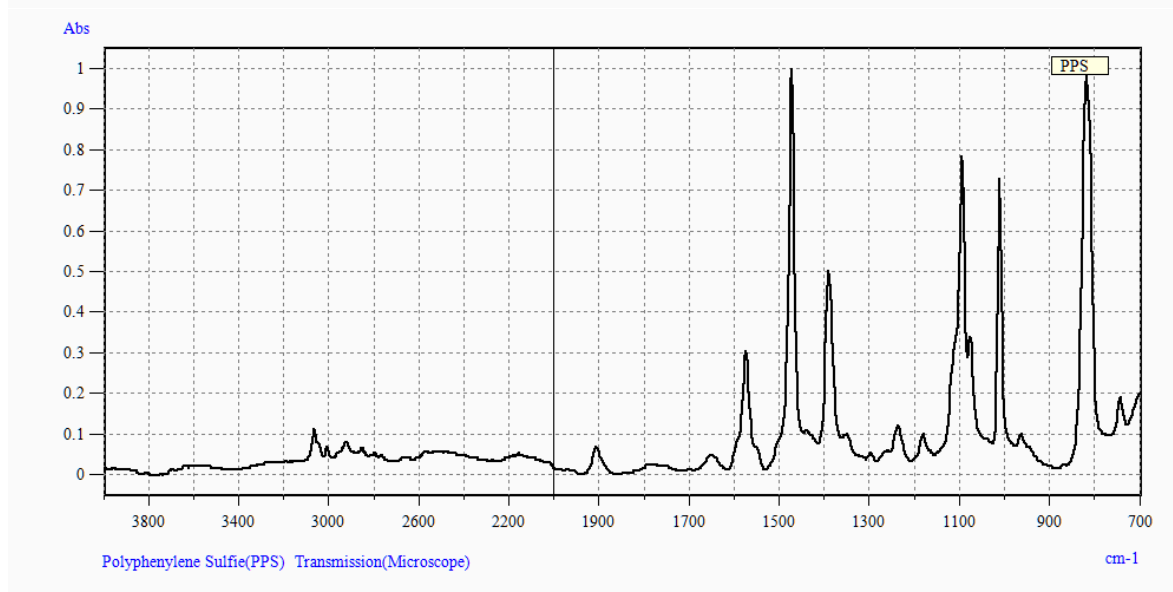

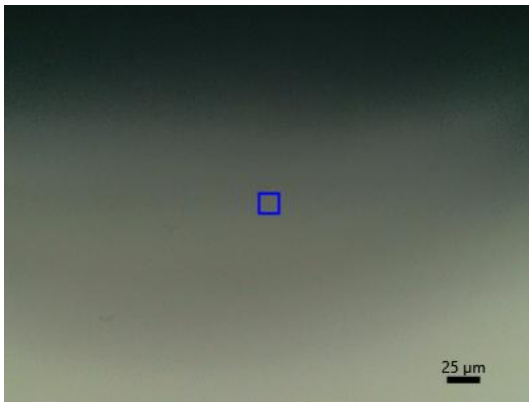

## Search Result Report

Filename : C:\Users\User\Desktop\UTSA samples\UV042821HA05\Point  
 Measurement\_fiber\_30.apit  
 Acquired Datetime : 2022/11/11 14:32:13

● **Search Parameters**

Library list :  
 IRs Polymer2  
 ATR-Polymer2  
 T-Polymer2  
 Maximum hits: 200  
 Minimum quality : 0  
 Algorithm : DiffDeriv

| Score | Library      | Name  | Comment                                                                                                        |
|-------|--------------|-------|----------------------------------------------------------------------------------------------------------------|
| 590   | IRs Polymer2 | DLTDP | DLTDPANTIOXIDANT (CONTAINING SULFUR)DILAURYL THIODIPROPIONATEC30H58O4SCAS NO. 123-28-4ATR/diamond ATRcorrected |

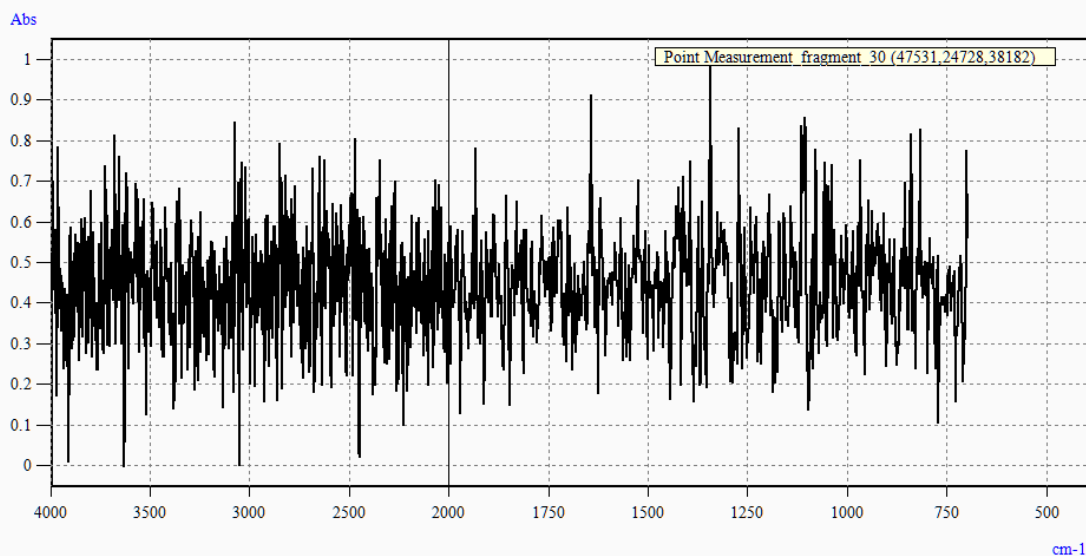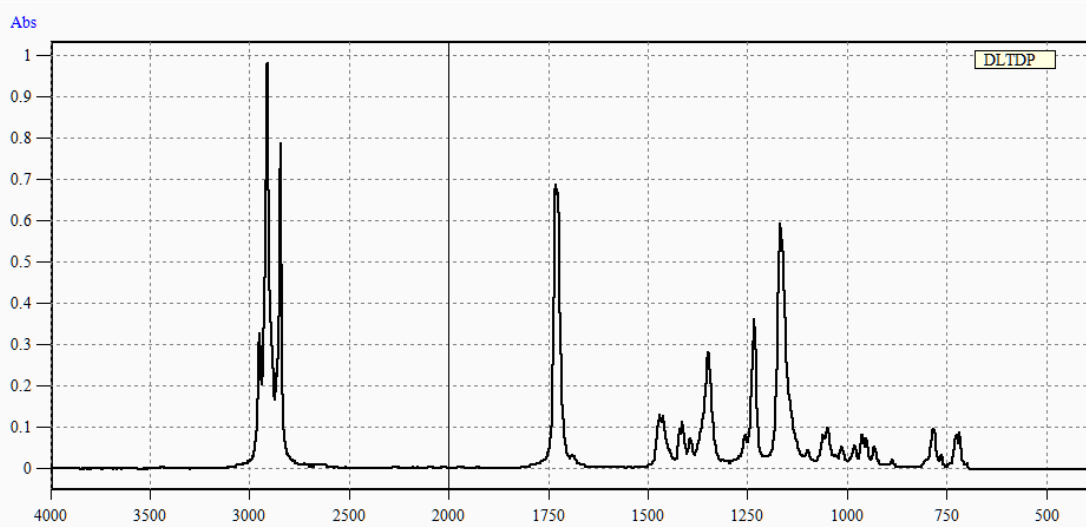

DLTDPANTIOXIDANT (CONTAINING SULFUR)DILAURYL THIODIPROPIONATEC30H58O4SCAS NO. 123-28-4ATR/diamond ATRcorrecte@<sup>m</sup>-1

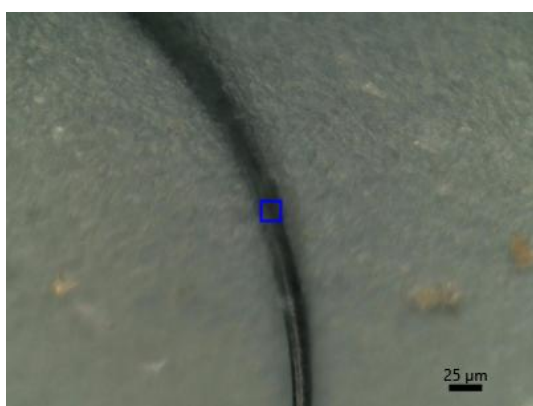

# Search Result Report

Filename : C:\Users\User\Desktop\UTSA samples\UV042821HA05\Point  
 Measurement\_fiber\_blue\_twist\_30.apit  
 Acquired Datetime : 2022/11/11 14:42:16

● **Search Parameters**

Library list :  
 IRs Polymer2  
 ATR-Polymer2  
 T-Polymer2  
 Maximum hits: 200  
 Minimum quality : 0  
 Algorithm : DiffDeriv

| Score | Library      | Name                 | Comment                                     |
|-------|--------------|----------------------|---------------------------------------------|
| 575   | ATR-Polymer2 | D_Polyethyleneglycol | Polyethylene Glycol 20000<br>DuraSamplIR-II |

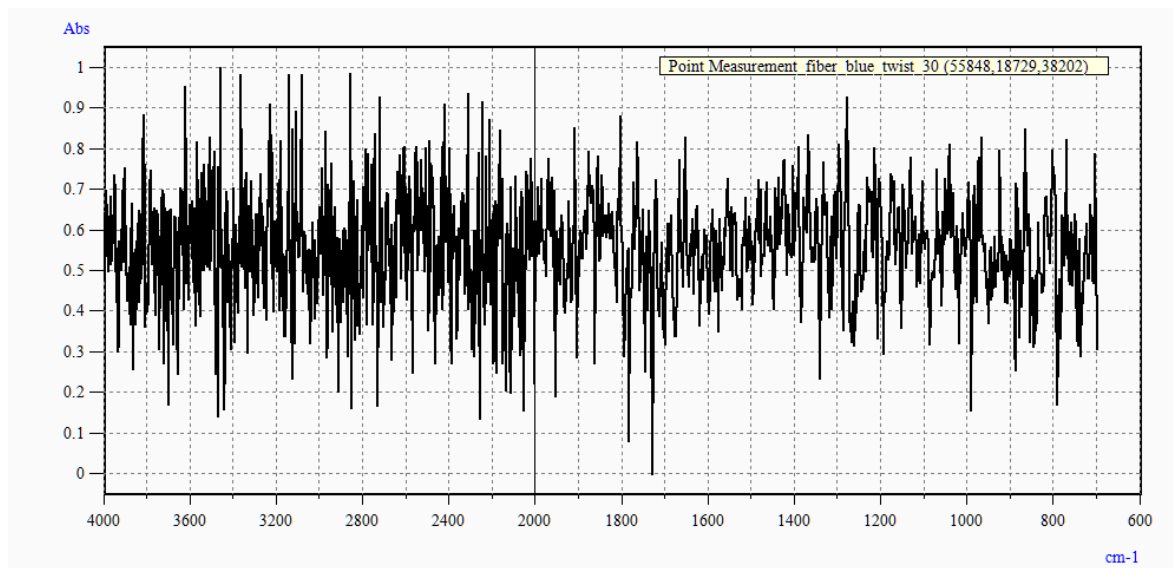

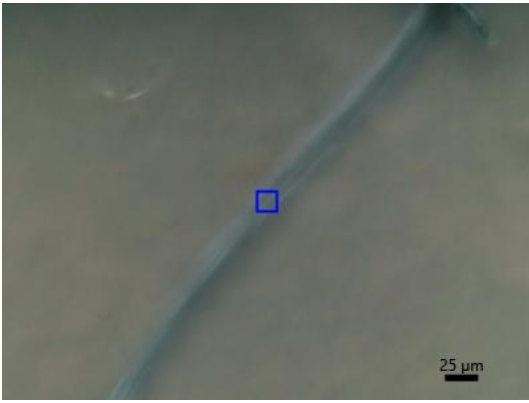

# Search Result Report

Filename : C:\Users\User\Desktop\UTSA samples\UV042821HA05\Point  
 Measurement\_fiber\_blue\_twist\_31.apit  
 Acquired Datetime : 2022/11/11 14:52:11

● **Search Parameters**

Library list :  
 IRs Polymer2  
 ATR-Polymer2  
 T-Polymer2  
 Maximum hits: 200  
 Minimum quality : 0  
 Algorithm : DiffDeriv

| Score | Library      | Name     | Comment                                                                |
|-------|--------------|----------|------------------------------------------------------------------------|
| 577   | IRs Polymer2 | BUTYL_RB | Butyl rubber with salt(salt:1540,1016,876cm-1)ATR/diamond ATRcorrected |

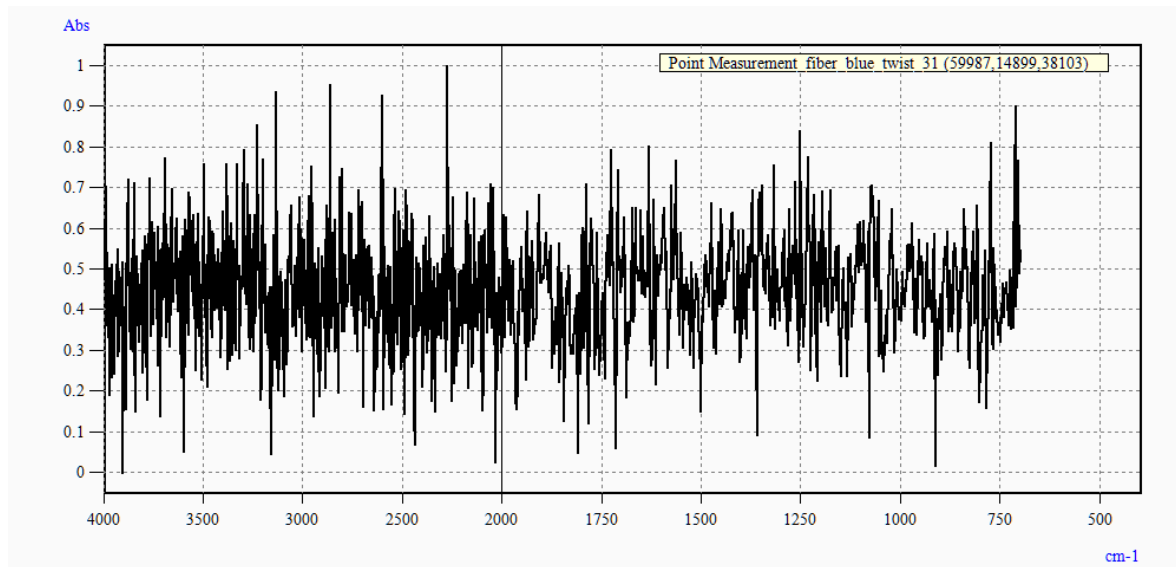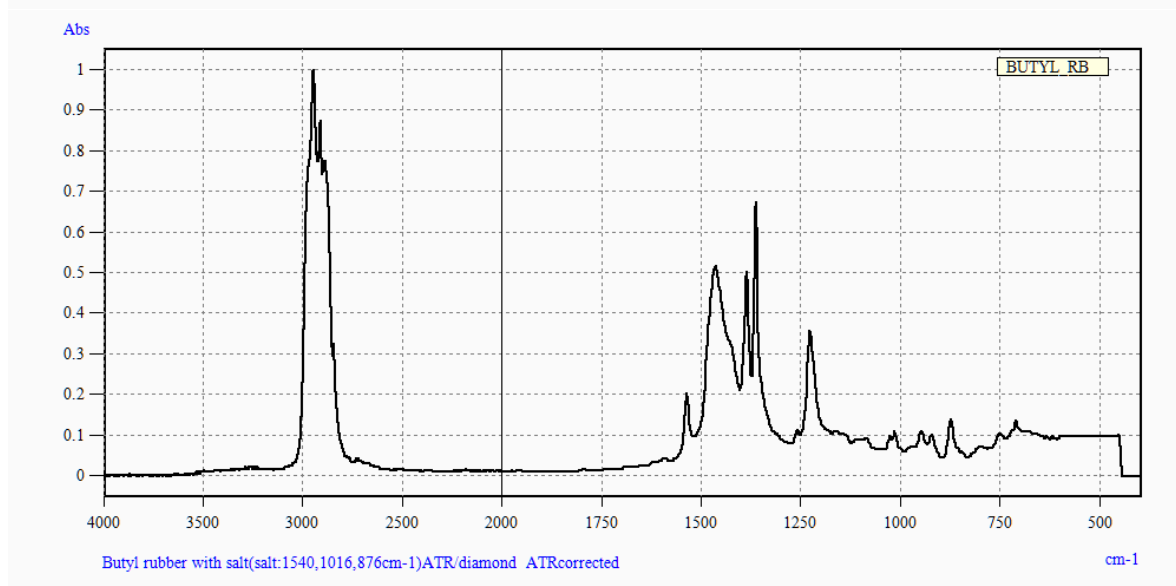

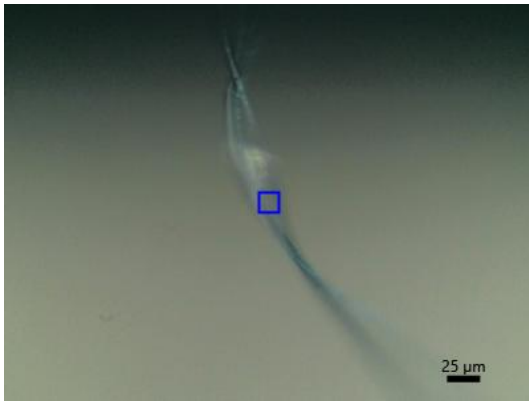

# Search Result Report

Filename : C:\Users\User\Desktop\UTSA samples\UV042821HA05\Point  
 Measurement\_fiber\_blue\_twist\_32.apit  
 Acquired Datetime : 2022/11/11 15:02:00

● **Search Parameters**

Library list :  
 IRs Polymer2  
 ATR-Polymer2  
 T-Polymer2  
 Maximum hits: 200  
 Minimum quality : 0  
 Algorithm : DiffDeriv

| Score | Library    | Name  | Comment                                                     |
|-------|------------|-------|-------------------------------------------------------------|
| 580   | T-Polymer2 | Epoxy | Epoxy Resin(Electronic Parts-3)<br>Transmission(Microscope) |

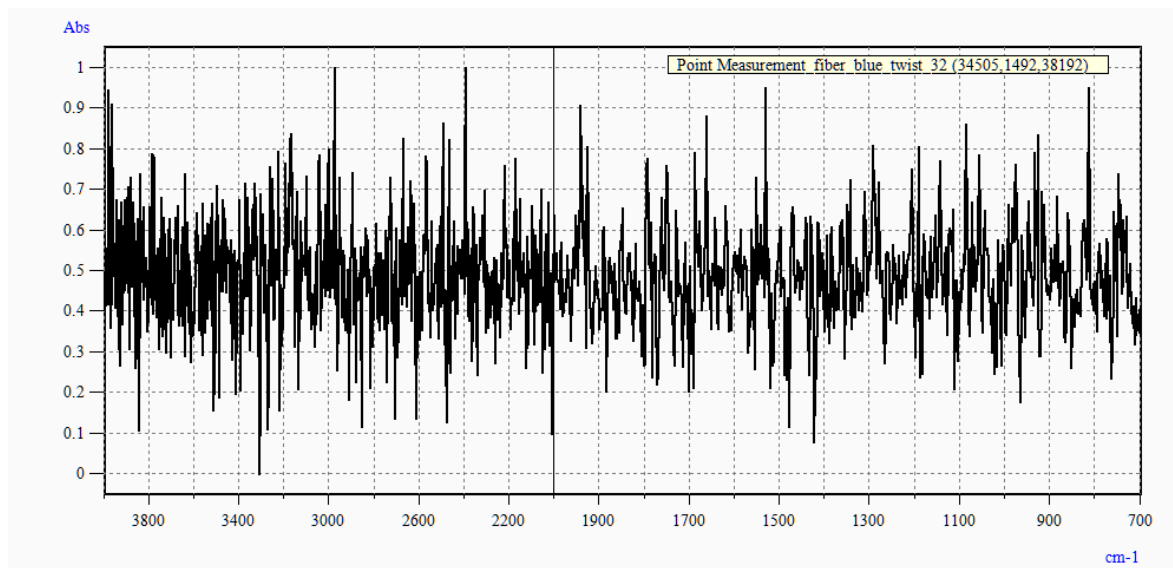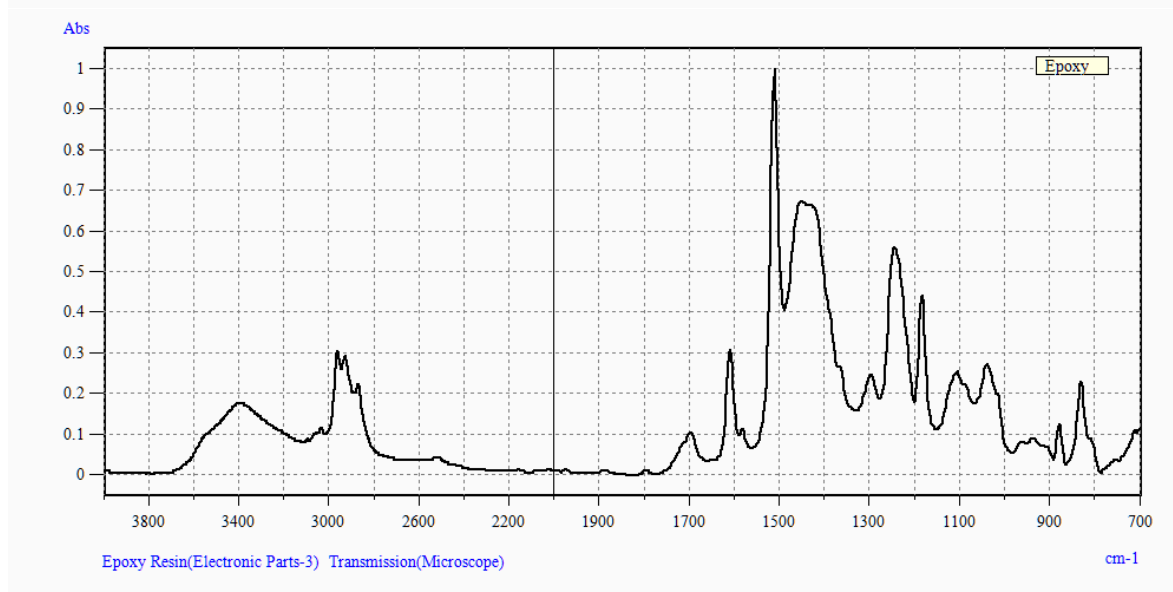

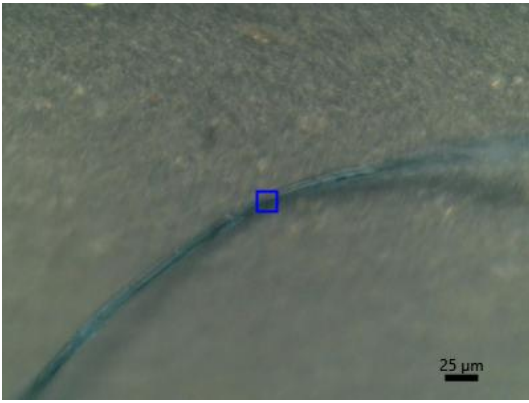

## Search Result Report

Filename : C:\Users\User\Desktop\UTSA samples\UV042821HA05\Point  
 Measurement\_fiber\_blue\_twist\_34.apit  
 Acquired Datetime : 2022/11/11 15:11:14

● **Search Parameters**

Library list :  
 IRs Polymer2  
 ATR-Polymer2  
 T-Polymer2  
 Maximum hits: 200  
 Minimum quality : 0  
 Algorithm : DiffDeriv

| Score | Library      | Name   | Comment                      |
|-------|--------------|--------|------------------------------|
| 586   | IRs Polymer2 | LLDPE1 | Low Density PolyethyleneFilm |

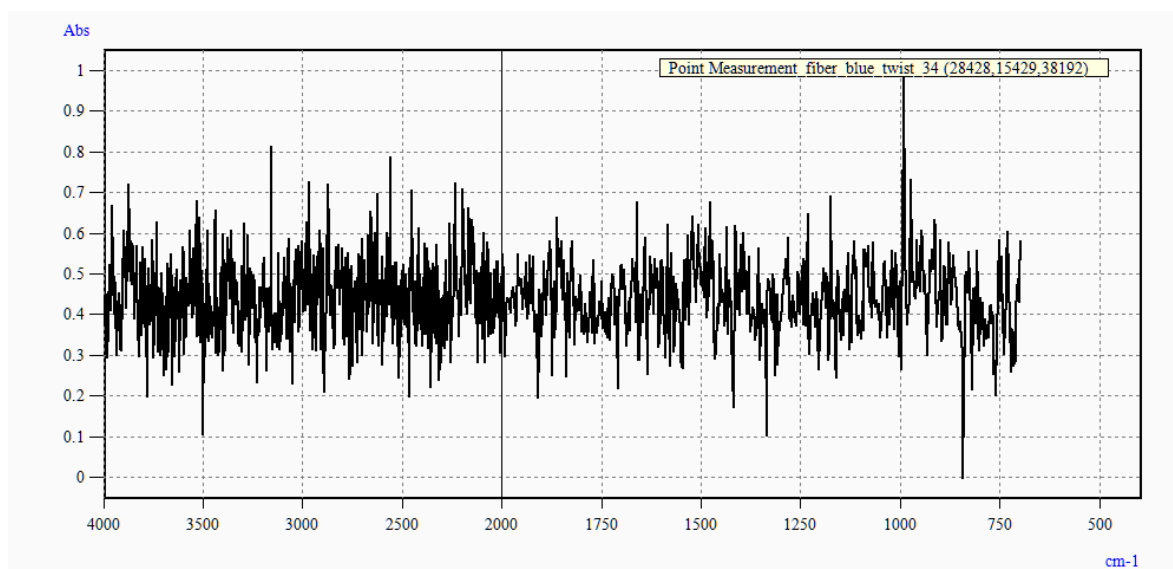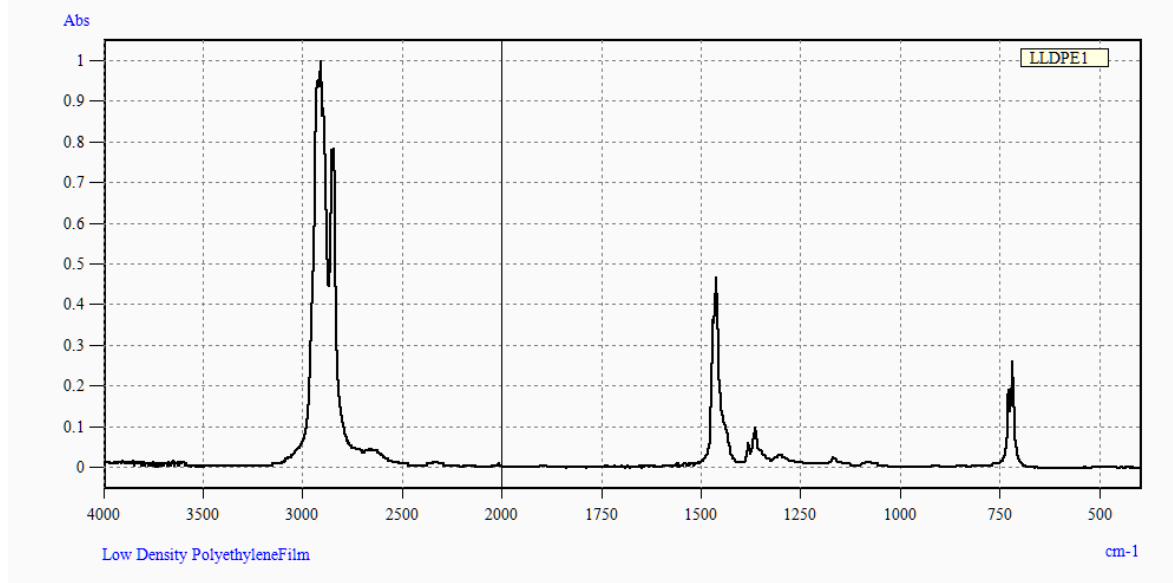

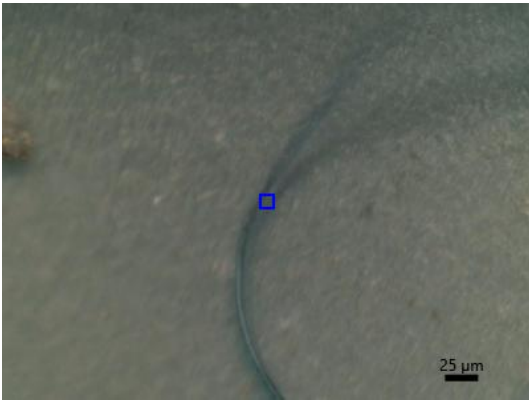

## Search Result Report

Filename : C:\Users\User\Desktop\UTSA samples\UV042821HA05\Point  
 Measurement\_fiber\_blue\_twist\_35.apit  
 Acquired Datetime : 2022/11/11 15:18:29

● **Search Parameters**

Library list :  
 IRs Polymer2  
 ATR-Polymer2  
 T-Polymer2  
 Maximum hits: 200  
 Minimum quality : 0  
 Algorithm : DiffDeriv

| Score | Library      | Name  | Comment                                                                                   |
|-------|--------------|-------|-------------------------------------------------------------------------------------------|
| 609   | IRs Polymer2 | P-EPQ | P-EPQANTIOXIDANT<br>PHOSPHONITE<br>COMPOUND C68H92O4P2CAS<br>NO. ATR/diamond ATRcorrected |

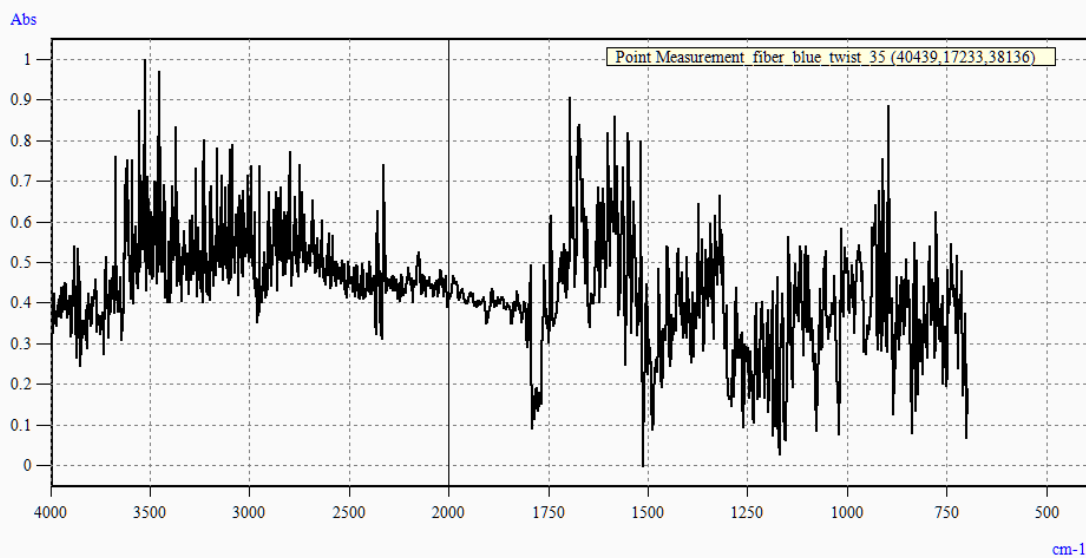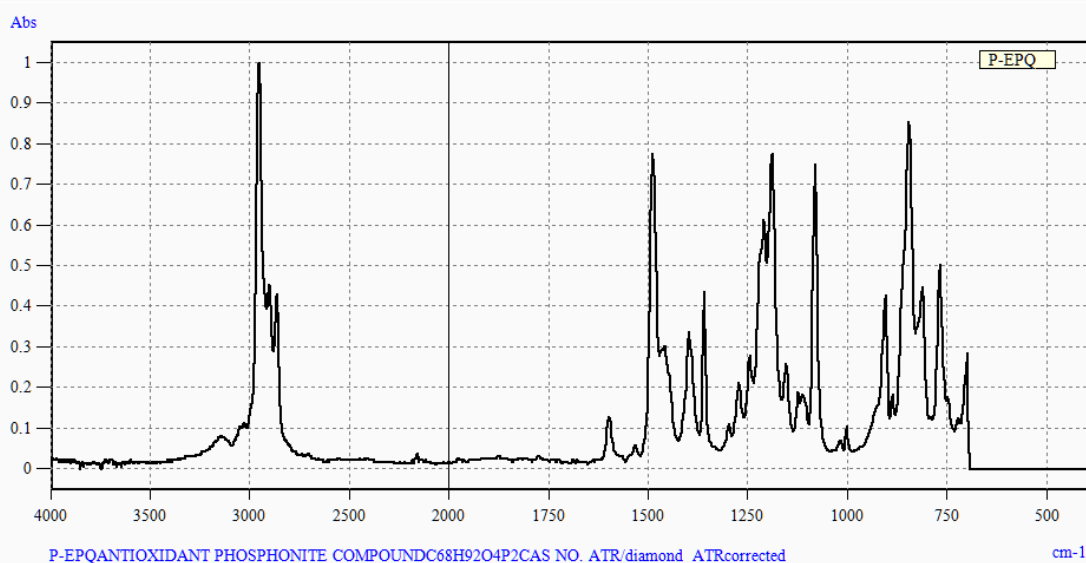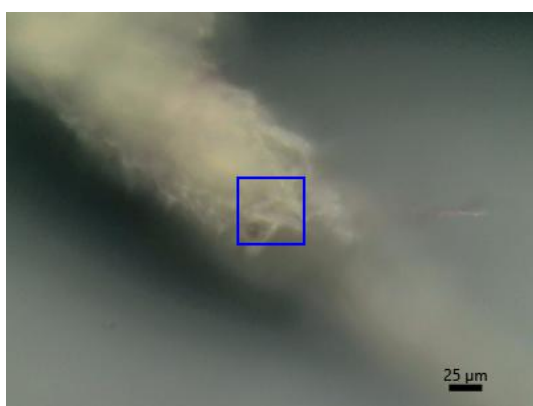

# Search Result Report

Filename : C:\Users\User\Desktop\UTSA samples\UV042821HA05\Point  
 Measurement\_fiber\_white\_35.apit  
 Acquired Datetime : 2022/11/11 15:24:23

● **Search Parameters**

Library list :  
 IRs Polymer2  
 ATR-Polymer2  
 T-Polymer2  
 Maximum hits: 200  
 Minimum quality : 0  
 Algorithm : DiffDeriv

| Score | Library      | Name     | Comment                                                           |
|-------|--------------|----------|-------------------------------------------------------------------|
| 588   | ATR-Polymer2 | D_PC-PBT | Polycarbonate/Polybutylene Terephthalate(PC/PBT)<br>DuraSampIR-II |

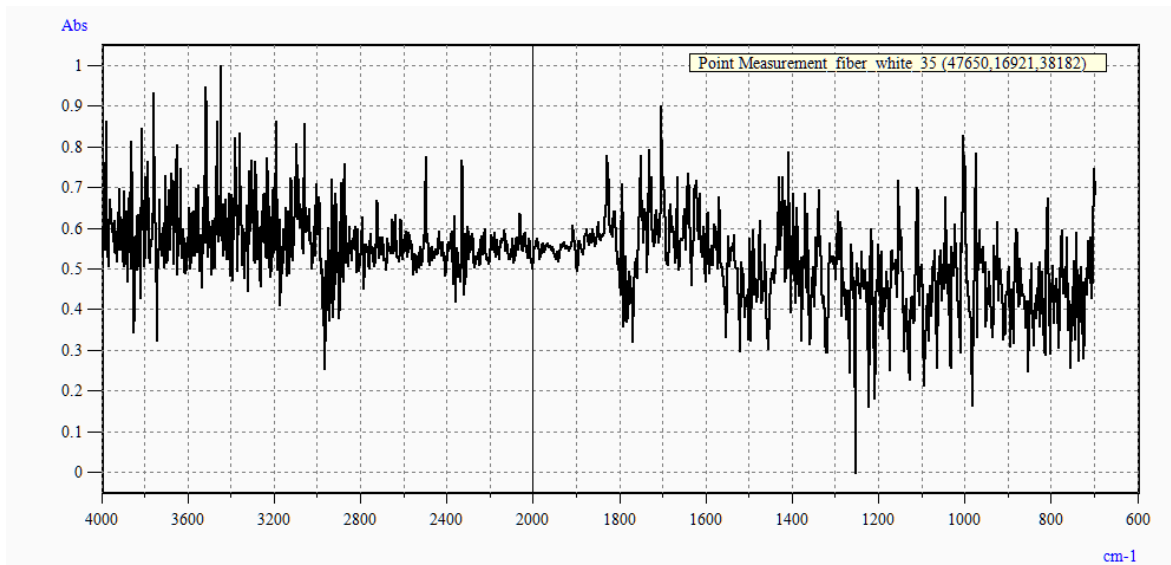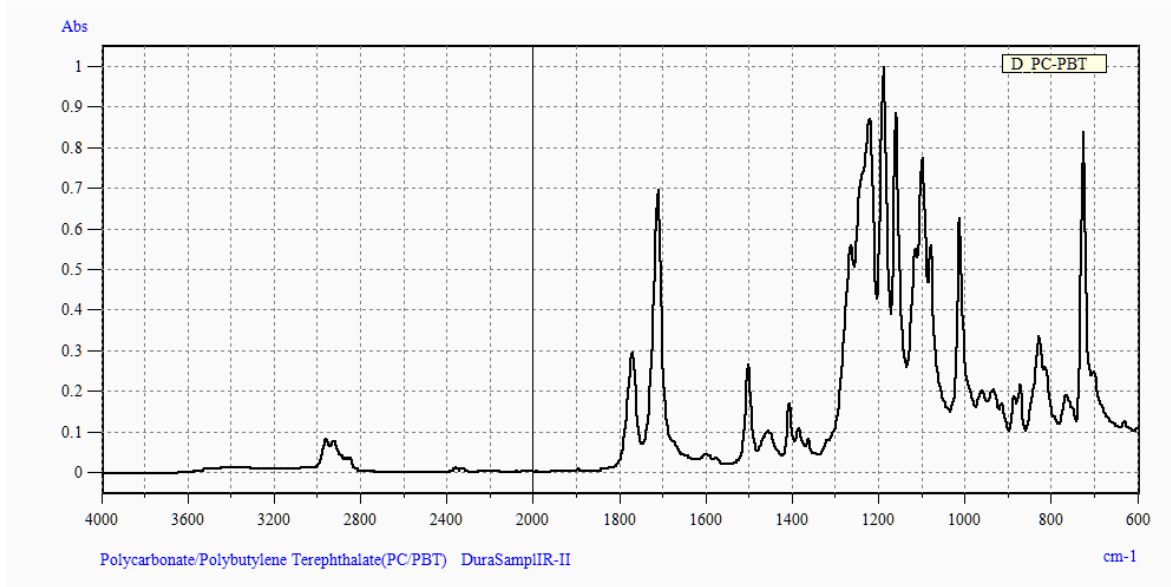

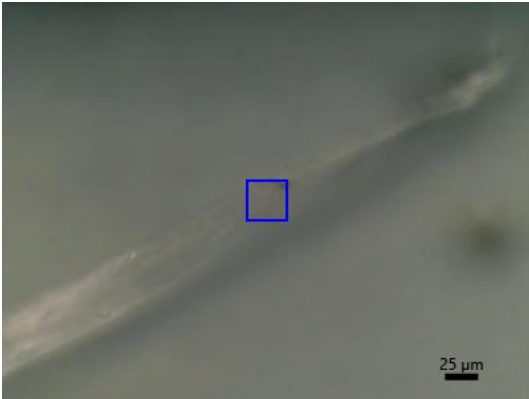

# Search Result Report

Filename : C:\Users\User\Desktop\UTSA samples\UV042821HA05\Point  
 Measurement\_fiber\_white\_twist\_36.apit  
 Acquired Datetime : 2022/11/11 15:39:59

● **Search Parameters**

Library list :  
 IRs Polymer2  
 ATR-Polymer2  
 T-Polymer2  
 Maximum hits: 200  
 Minimum quality : 0  
 Algorithm : DiffDeriv

| Score | Library    | Name | Comment                                                 |
|-------|------------|------|---------------------------------------------------------|
| 592   | T-Polymer2 | PI   | Polyimide(Electronic Parts)<br>Transmission(Microscope) |

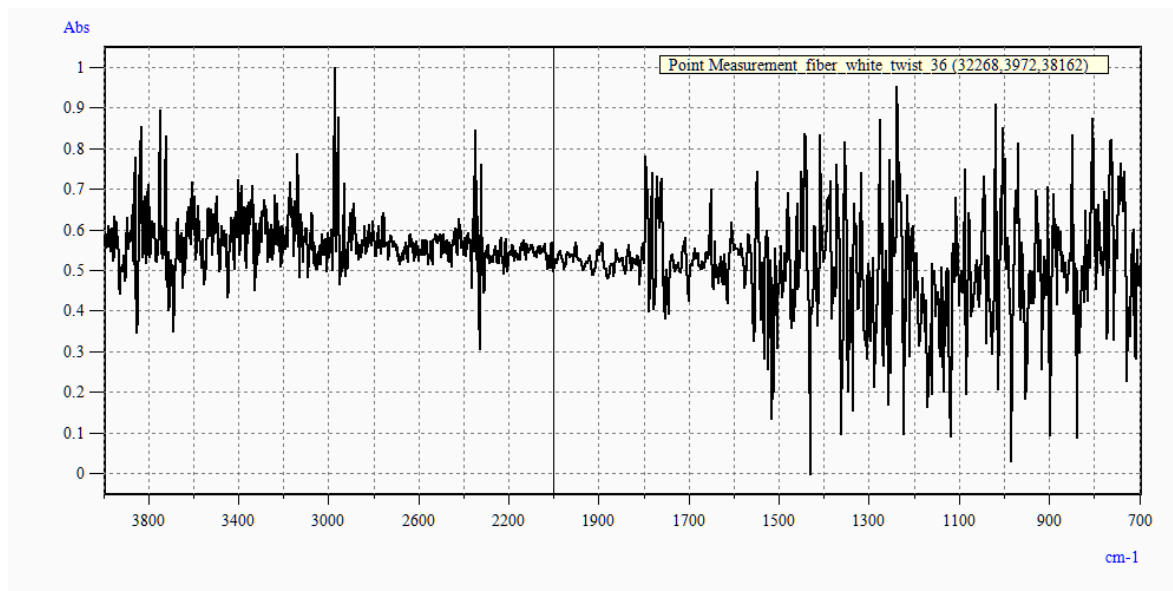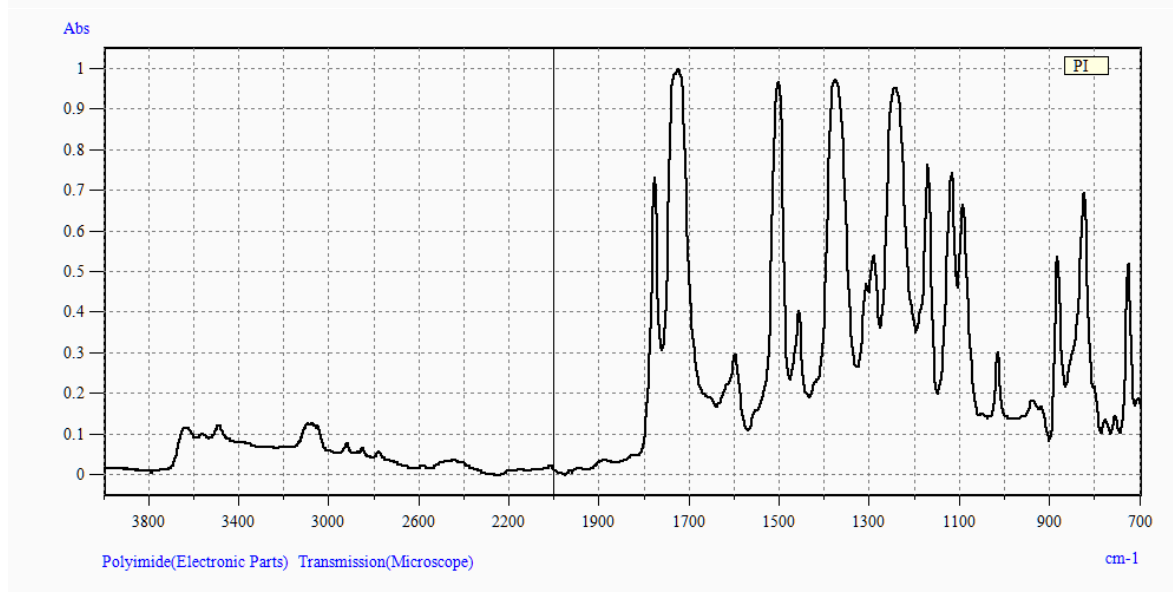

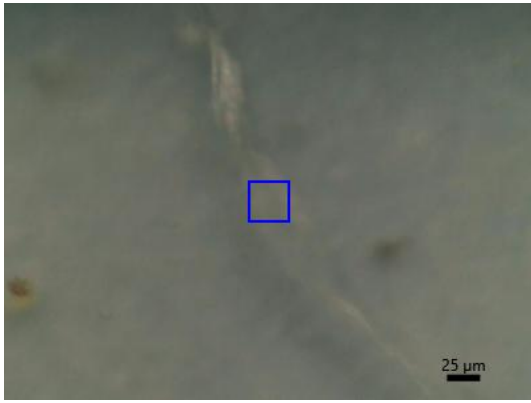

## Search Result Report

Filename : C:\Users\User\Desktop\UTSA samples\UV042821HA05\Point  
 Measurement\_fiber\_white\_twist\_37.apit  
 Acquired Datetime : 2022/11/11 15:44:46

● **Search Parameters**

Library list :  
 IRs Polymer2  
 ATR-Polymer2  
 T-Polymer2  
 Maximum hits: 200  
 Minimum quality : 0  
 Algorithm : DiffDeriv

| Score | Library      | Name        | Comment                                          |
|-------|--------------|-------------|--------------------------------------------------|
| 598   | ATR-Polymer2 | D_Additive3 | Polymer Additive(Irganox 1330)<br>DuraSamplIR-II |

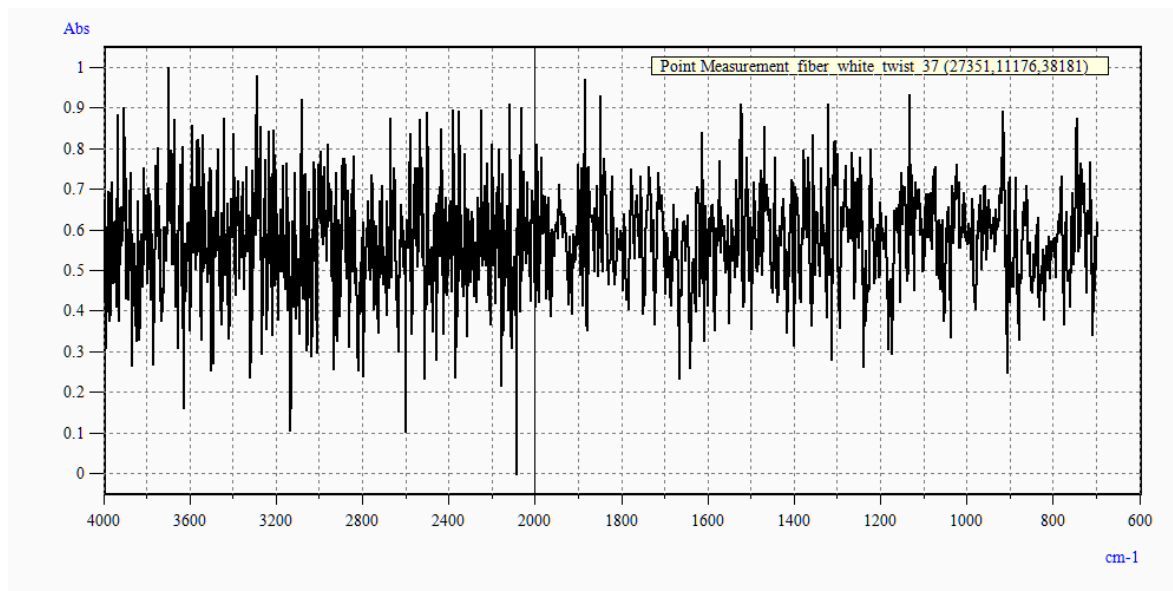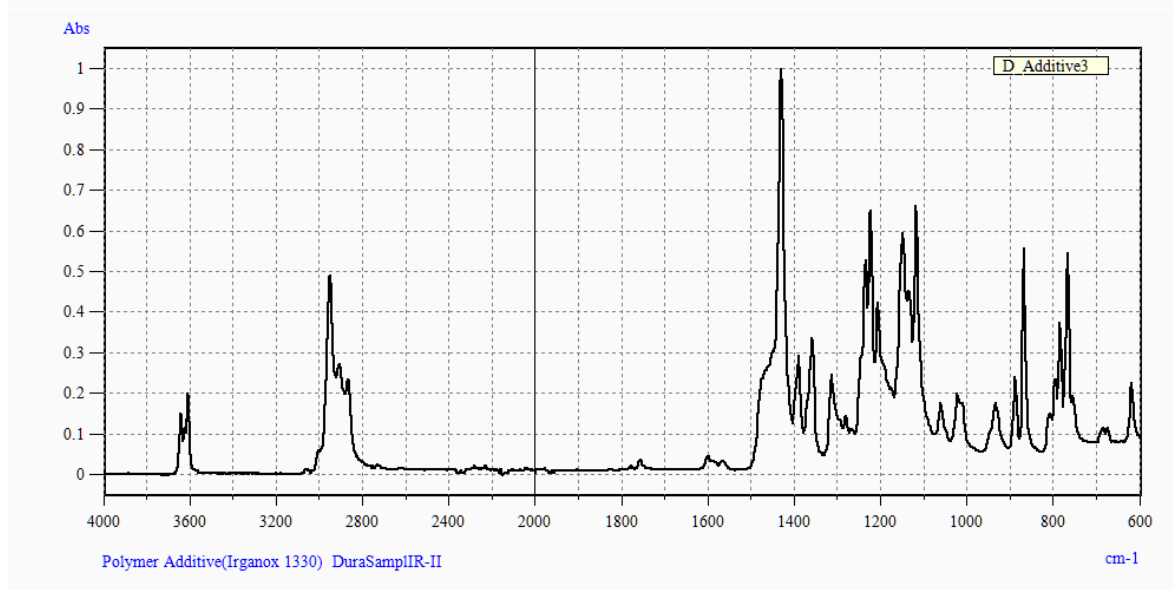

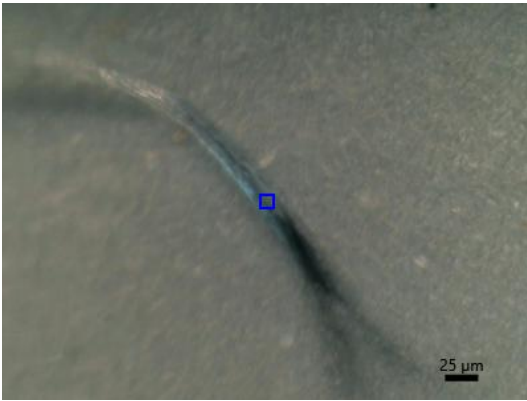

# Search Result Report

Filename : C:\Users\User\Desktop\UTSA samples\UV042821HA05\Point  
 Measurement\_fiber\_white\_twist\_38.apit  
 Acquired Datetime : 2022/11/11 15:49:24

● **Search Parameters**

Library list :  
 IRs Polymer2  
 ATR-Polymer2  
 T-Polymer2  
 Maximum hits: 200  
 Minimum quality : 0  
 Algorithm : DiffDeriv

| Score | Library      | Name        | Comment                                         |
|-------|--------------|-------------|-------------------------------------------------|
| 579   | ATR-Polymer2 | D_Additive6 | Polymer Additive(Sanol LS770)<br>DuraSamplIR-II |

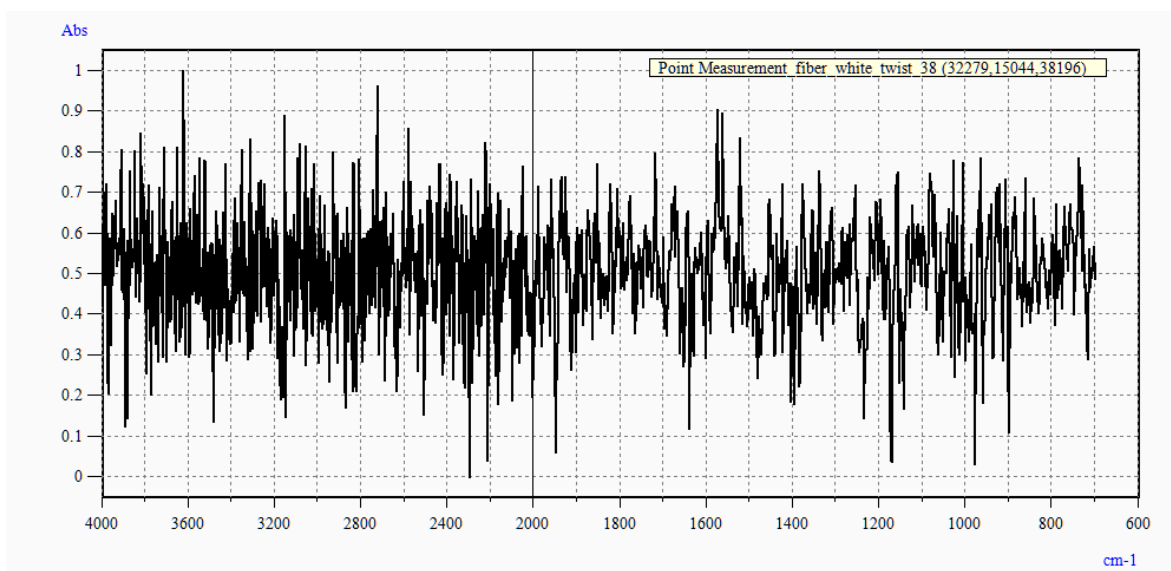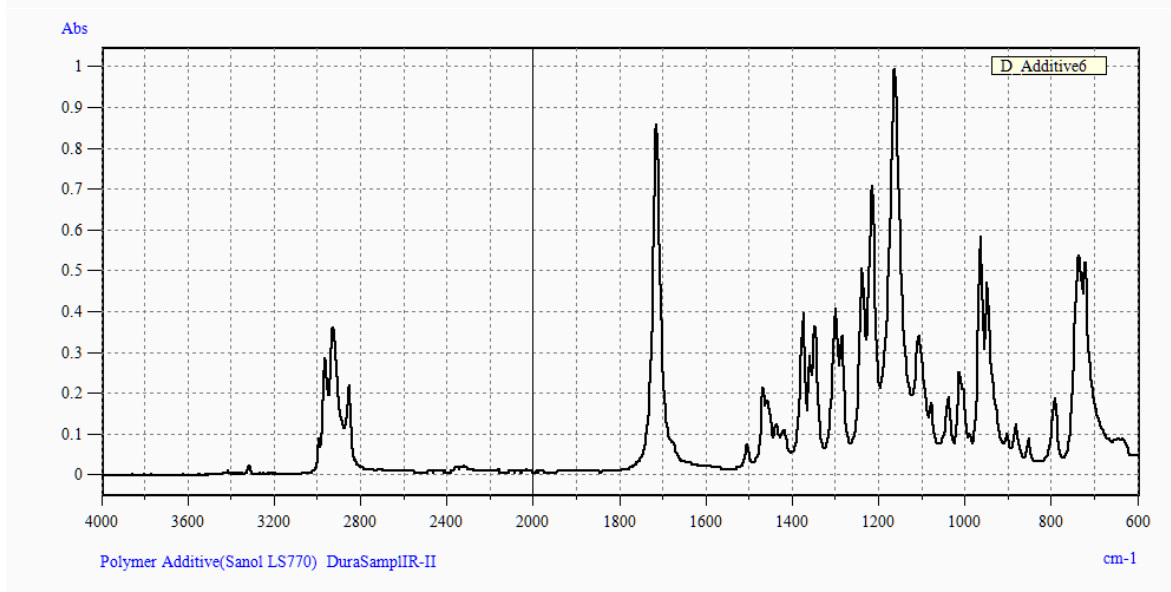

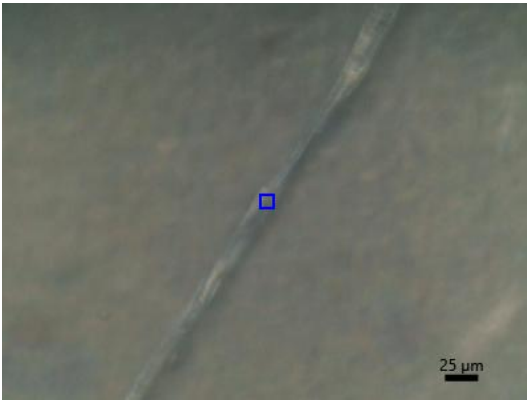

## Search Result Report

Filename : C:\Users\User\Desktop\UTSA samples\UV042821HA05\Point  
 Measurement\_fragment\_29.apit  
 Acquired Datetime : 2022/11/11 14:16:01

### ● Search Parameters

Library list :  
 IRs Polymer2  
 ATR-Polymer2  
 T-Polymer2  
 Maximum hits: 200  
 Minimum quality : 0  
 Algorithm : DiffDeriv

| Score | Library      | Name | Comment                                |
|-------|--------------|------|----------------------------------------|
| 575   | IRs Polymer2 | PS   | PolystyreneATR/diamond<br>ATRcorrected |

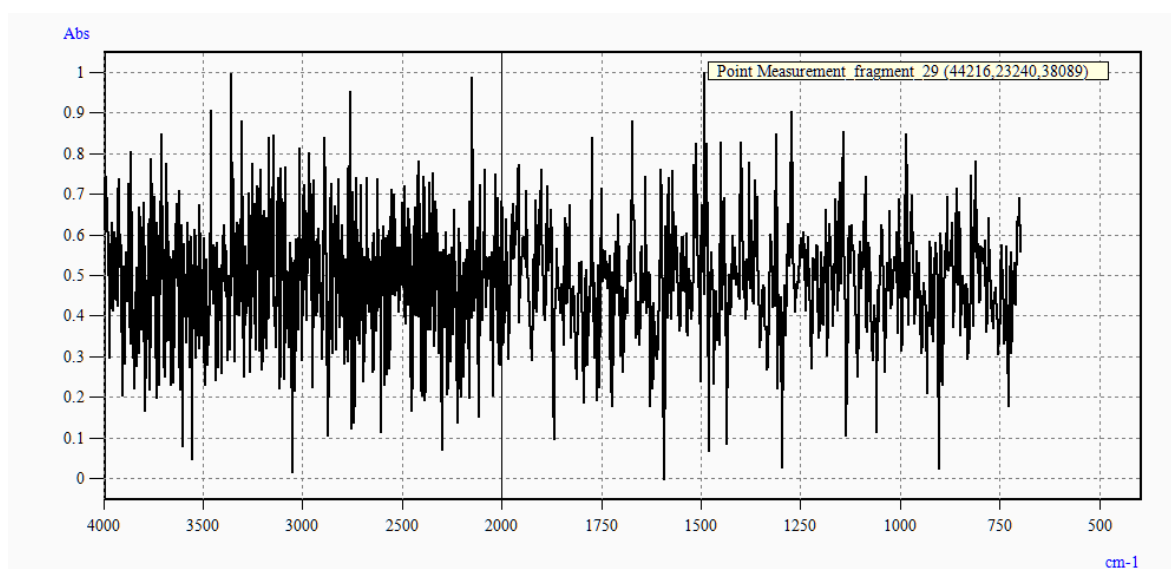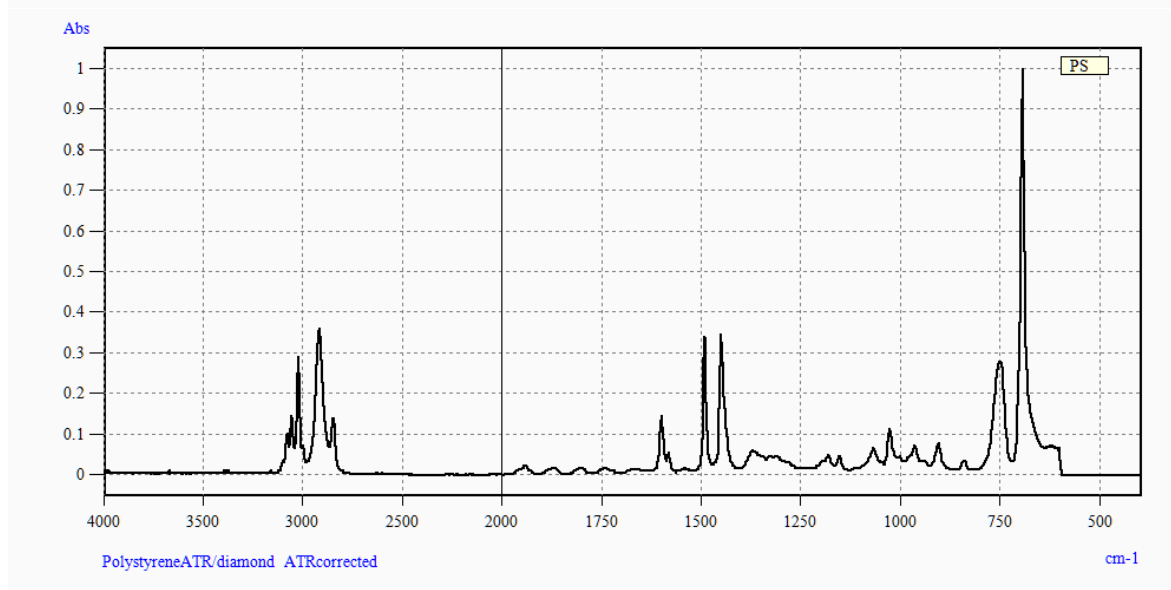

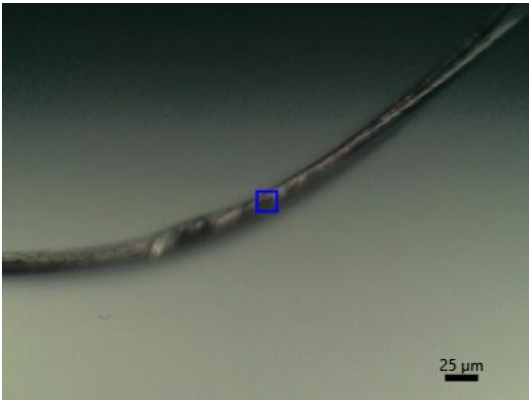

## Search Result Report

Filename : C:\Users\User\Desktop\UTSA samples\UV042821HA05\Point  
 Measurement\_fragment\_38.apit  
 Acquired Datetime : 2022/11/11 15:55:09

### ● Search Parameters

Library list :  
 IRs Polymer2  
 ATR-Polymer2  
 T-Polymer2  
 Maximum hits: 200  
 Minimum quality : 0  
 Algorithm : DiffDeriv

| Score | Library      | Name        | Comment                                         |
|-------|--------------|-------------|-------------------------------------------------|
| 587   | ATR-Polymer2 | D_Additive4 | Polymer Additive(Irganox MD1024) DuraSAMPLIR-II |

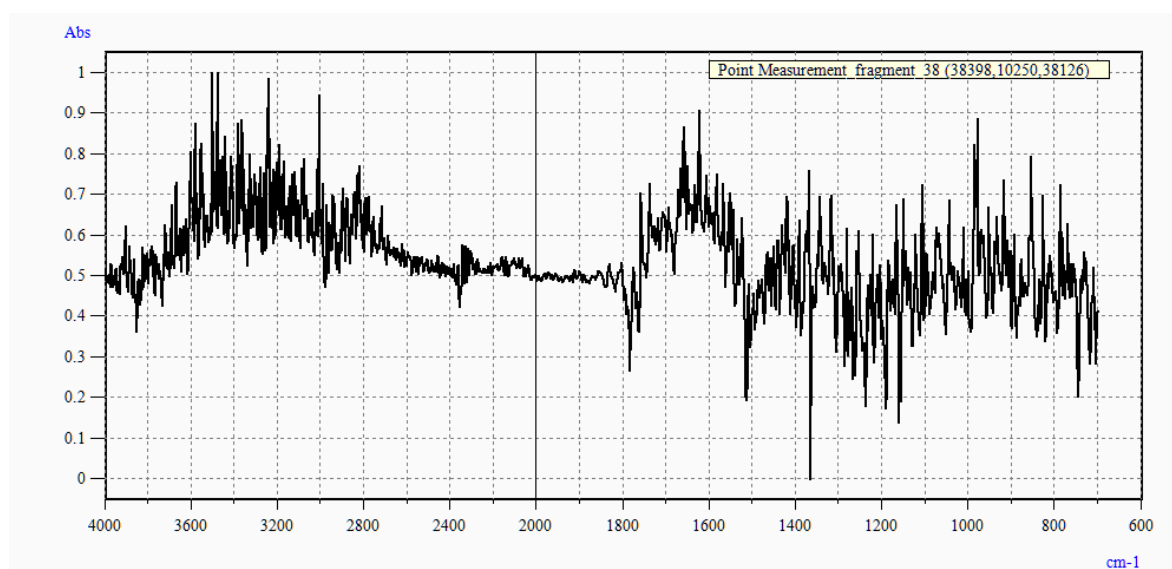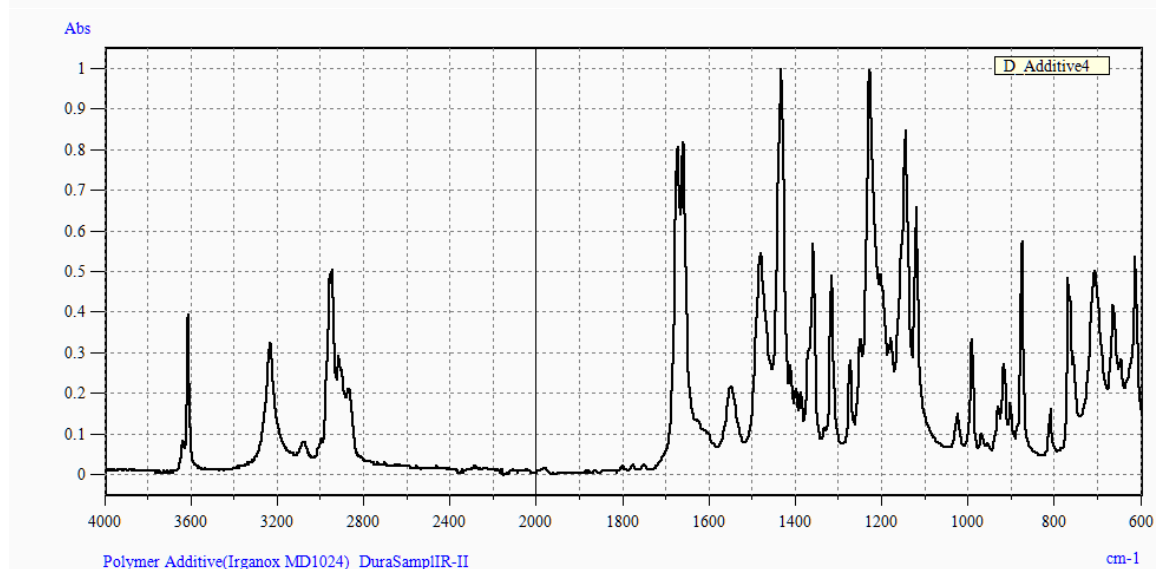

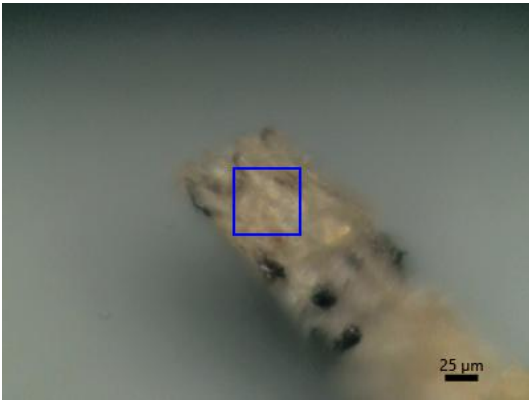

## Search Result Report

Filename : C:\Users\User\Desktop\UTSA samples\UV042821HA05\Point  
 Measurement\_fragment\_39.apit  
 Acquired Datetime : 2022/11/11 16:00:50

### ● Search Parameters

Library list :  
 IRs Polymer2  
 ATR-Polymer2  
 T-Polymer2  
 Maximum hits: 200  
 Minimum quality : 0  
 Algorithm : DiffDeriv

| Score | Library    | Name | Comment                                       |
|-------|------------|------|-----------------------------------------------|
| 667   | T-Polymer2 | PC   | Polycarbonate(PC)<br>Transmission(Microscope) |

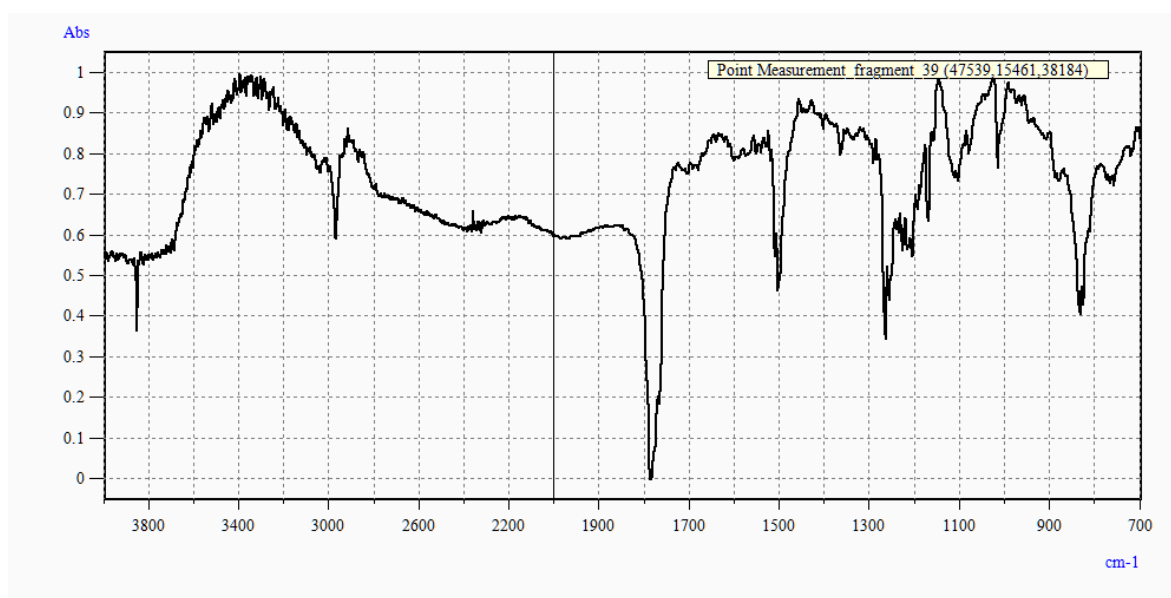

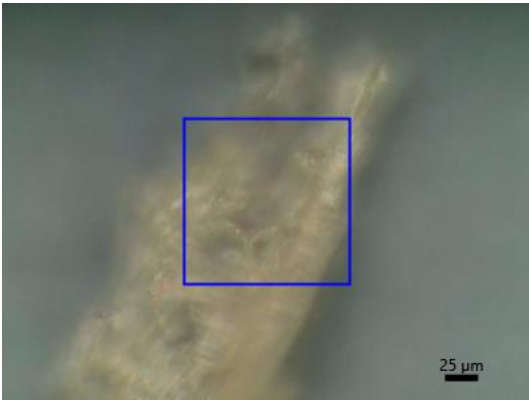

## Search Result Report

Filename : C:\Users\User\Desktop\UTSA samples\UV042821HA05\Point  
 Measurement\_fragment\_40.apit  
 Acquired Datetime : 2022/11/11 16:06:47

### ● Search Parameters

Library list :  
 IRs Polymer2  
 ATR-Polymer2  
 T-Polymer2  
 Maximum hits: 200  
 Minimum quality : 0  
 Algorithm : DiffDeriv

| Score | Library      | Name  | Comment                               |
|-------|--------------|-------|---------------------------------------|
| 605   | ATR-Polymer2 | D_PEI | Polyetherimide(PEI)<br>DuraSamplIR-II |

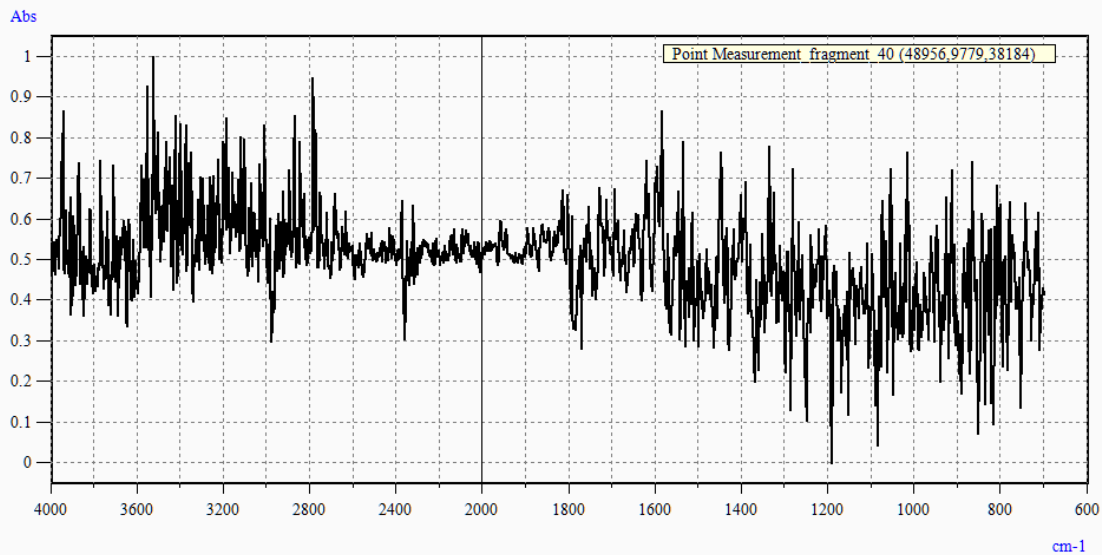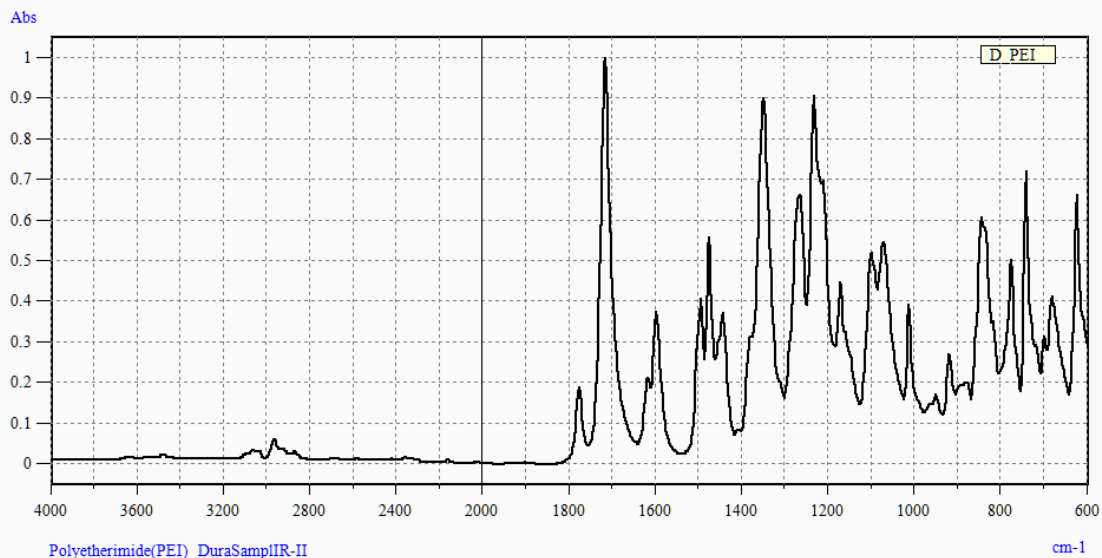

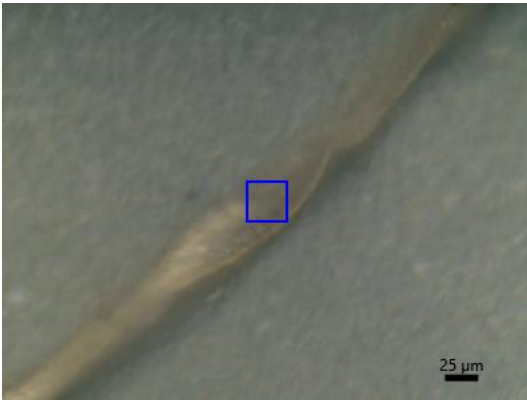

## Search Result Report

Filename : C:\Users\User\Desktop\UTSA samples\UV042821HA05\Point  
 Measurement\_fragment\_41.apit  
 Acquired Datetime : 2022/11/11 16:13:07

### ● Search Parameters

Library list :  
 IRs Polymer2  
 ATR-Polymer2  
 T-Polymer2  
 Maximum hits: 200  
 Minimum quality : 0  
 Algorithm : DiffDeriv

| Score | Library      | Name | Comment                                          |
|-------|--------------|------|--------------------------------------------------|
| 582   | IRs Polymer2 | PHSI | Phenylsilicone<br>rubberATR/diamond ATRcorrected |

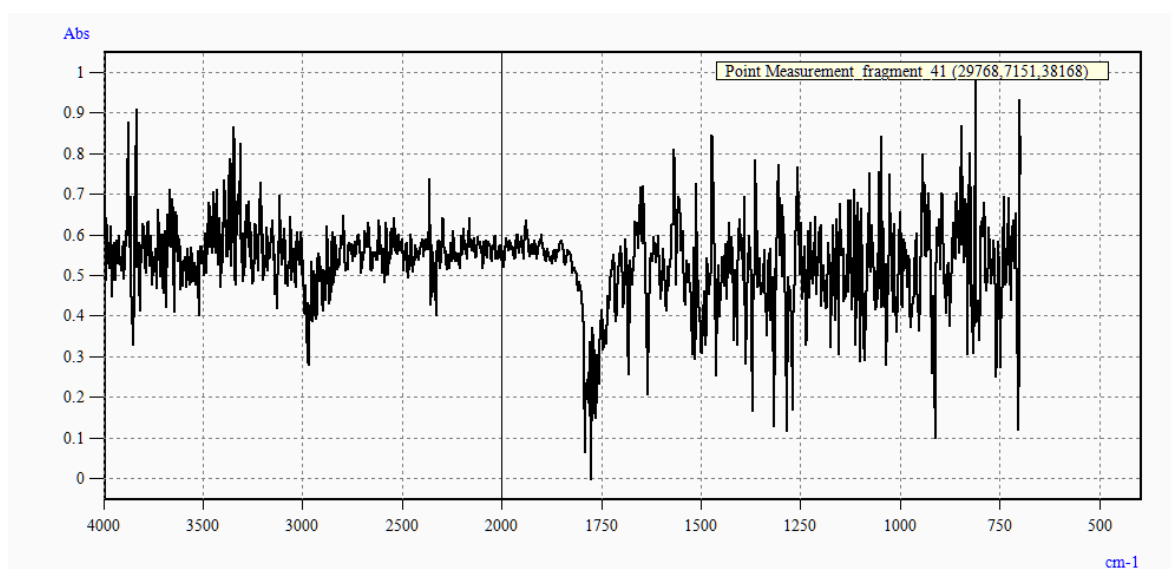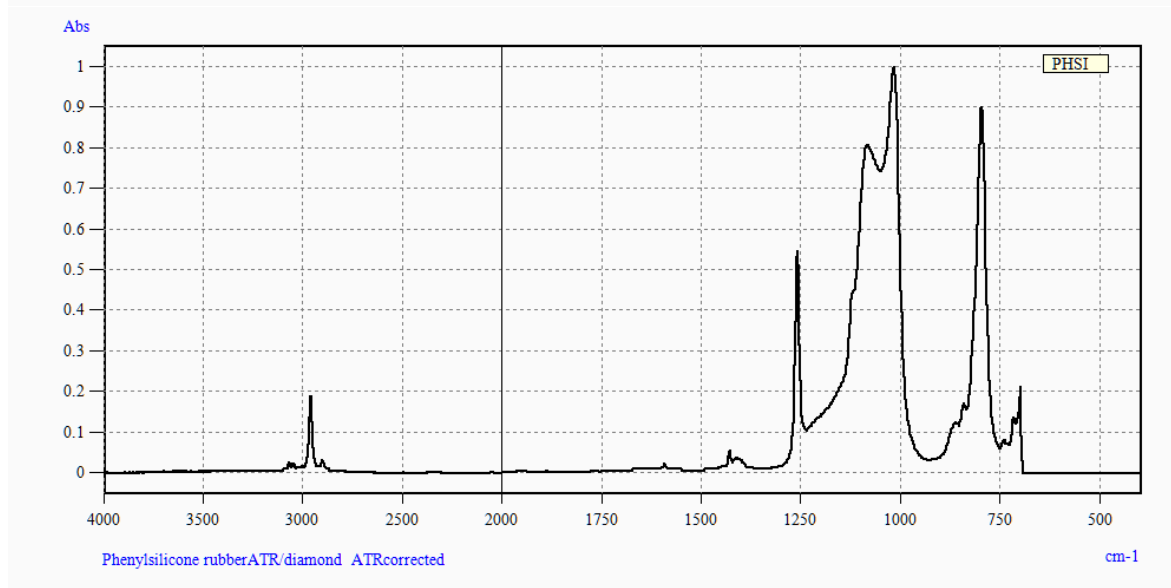

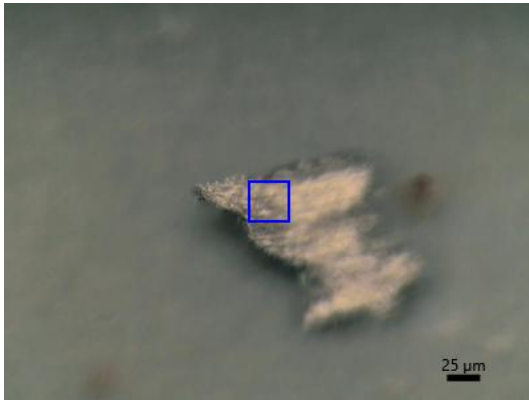

## Search Result Report

Filename : C:\Users\User\Desktop\UTSA samples\UV042821HA05\Point  
 Measurement\_fragment\_42.apit  
 Acquired Datetime : 2022/11/11 16:16:06

### ● Search Parameters

Library list :  
 IRs Polymer2  
 ATR-Polymer2  
 T-Polymer2  
 Maximum hits: 200  
 Minimum quality : 0  
 Algorithm : DiffDeriv

| Score | Library      | Name | Comment                          |
|-------|--------------|------|----------------------------------|
| 718   | ATR-Polymer2 | D_PC | Polycarbonate(PC) DuraSamplIR-II |

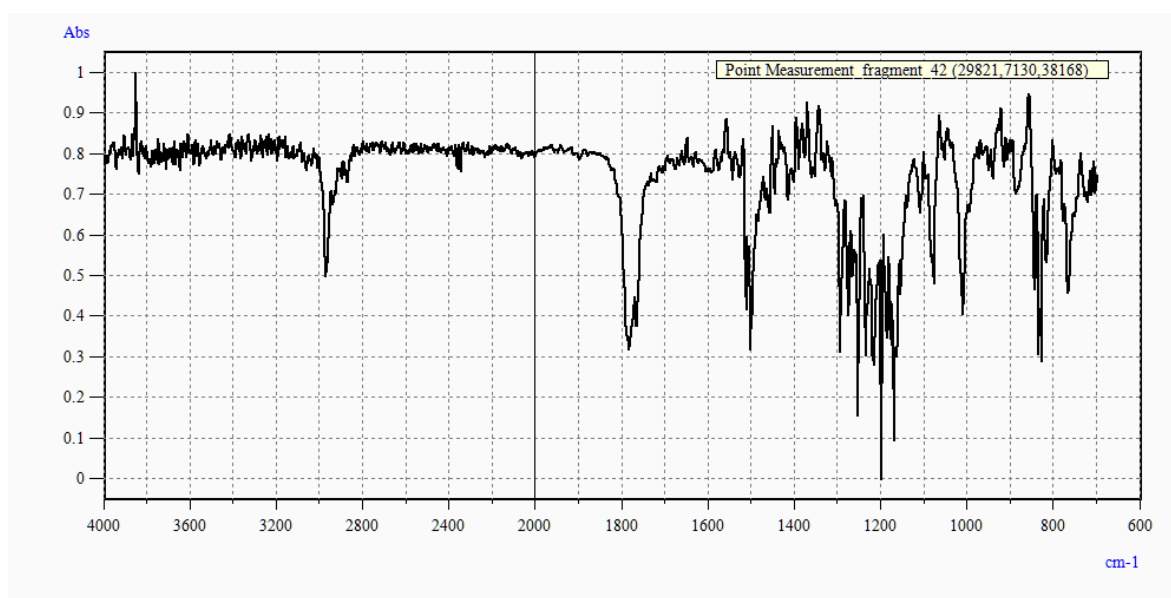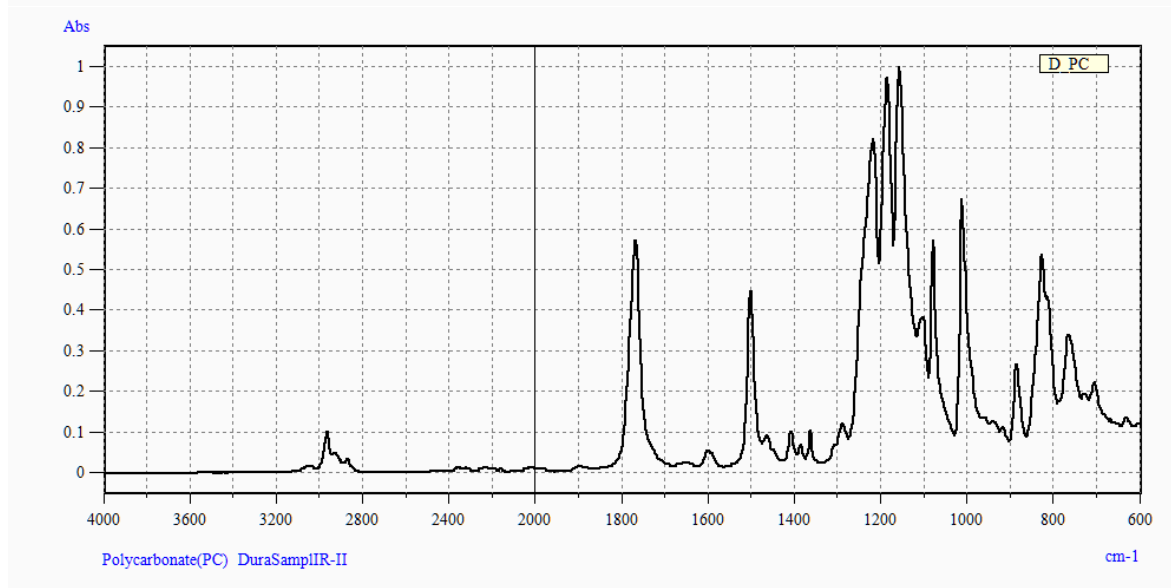

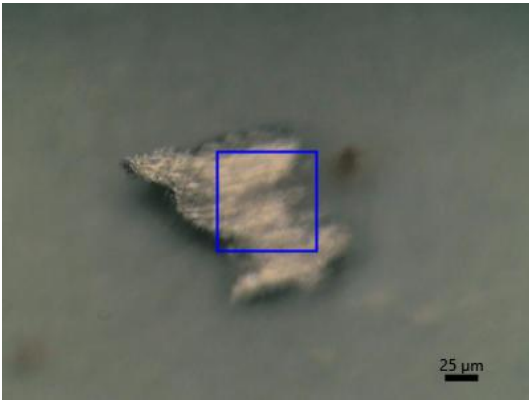

## Search Result Report

Filename : C:\Users\User\Desktop\UTSA samples\UV042821HA05\Point  
 Measurement\_fragment\_43.apit  
 Acquired Datetime : 2022/11/11 16:19:33

### ● Search Parameters

Library list :  
 IRs Polymer2  
 ATR-Polymer2  
 T-Polymer2  
 Maximum hits: 200  
 Minimum quality : 0  
 Algorithm : DiffDeriv

| Score | Library      | Name                       | Comment                                     |
|-------|--------------|----------------------------|---------------------------------------------|
| 596   | ATR-Polymer2 | D_Poly_alpha_Methylstyrene | Poly(alpha-Methylstyrene)<br>DuraSamplIR-II |

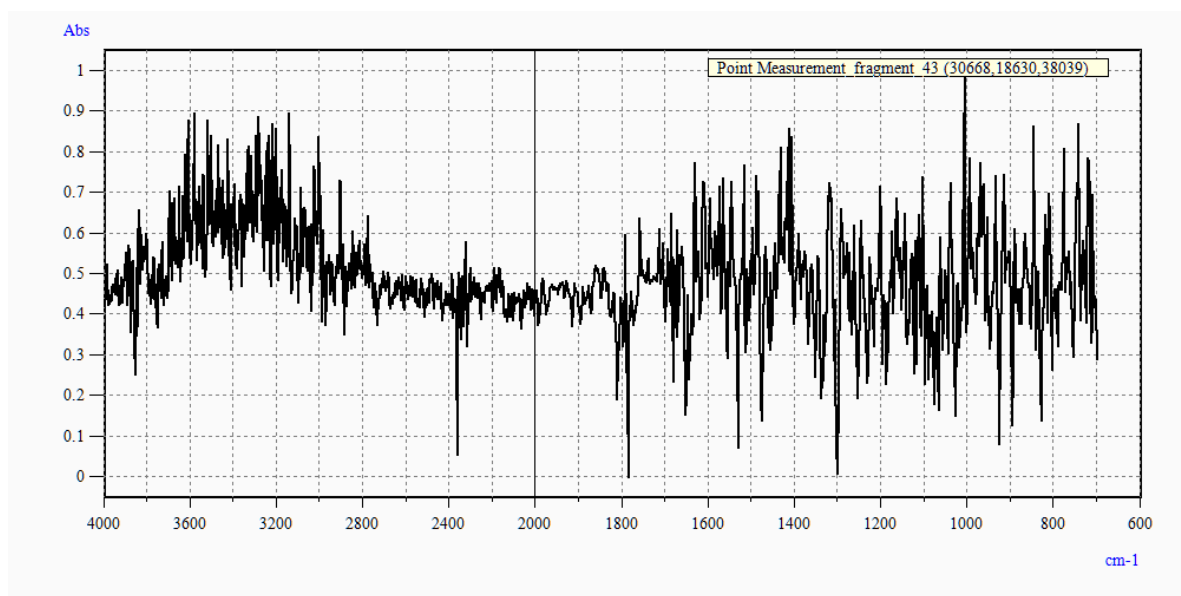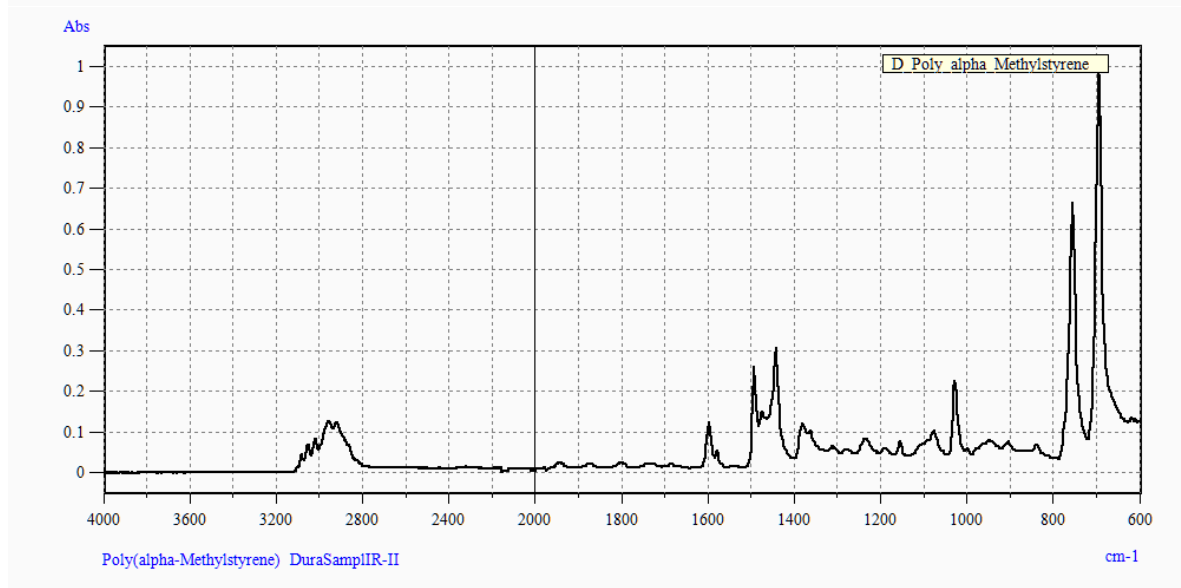

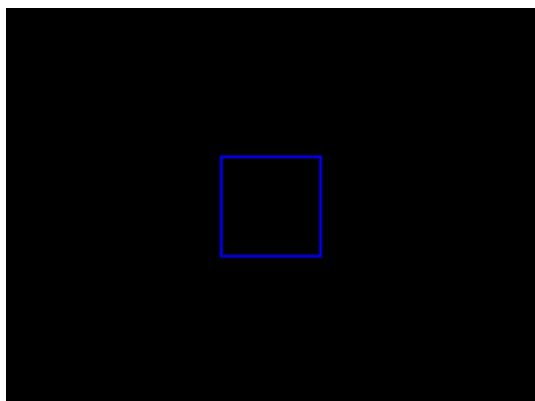

# Search Result Report

Filename : C:\Users\User\Desktop\UTSA samples\UV042821HA05\Point  
 Measurement\_fragment\_44.apit

Acquired Datetime : 2022/11/11 16:22:12

● **Search Parameters**

Library list :  
 IRs Polymer2  
 ATR-Polymer2  
 T-Polymer2  
 Maximum hits: 200  
 Minimum quality : 0  
 Algorithm : DiffDeriv

| Score | Library      | Name     | Comment                        |
|-------|--------------|----------|--------------------------------|
| 588   | ATR-Polymer2 | D_Epoxy6 | Epoxy Adhesives DuraSamplIR-II |

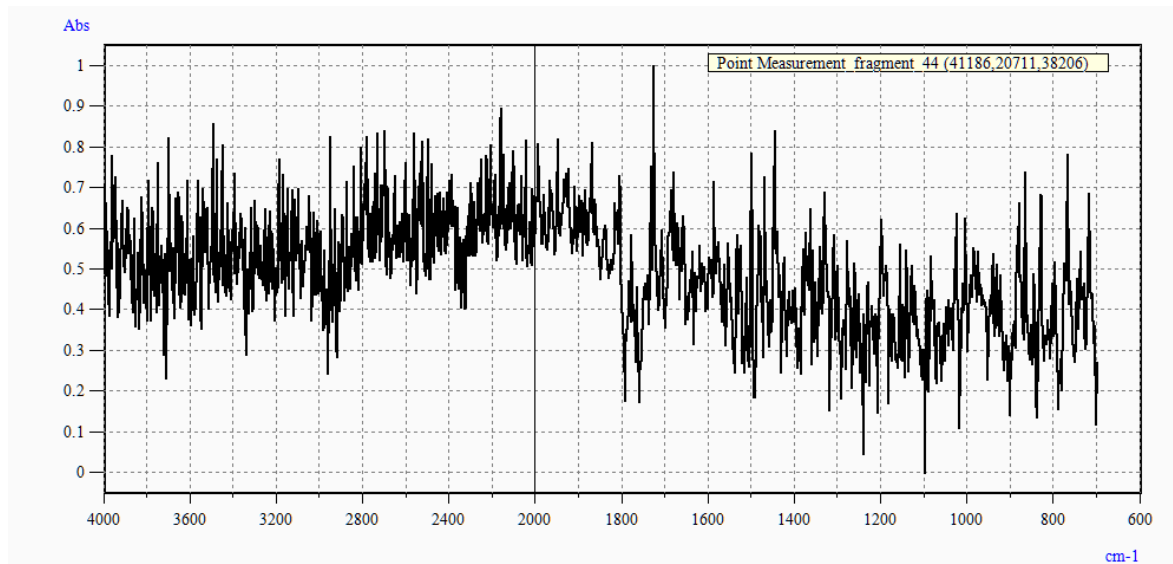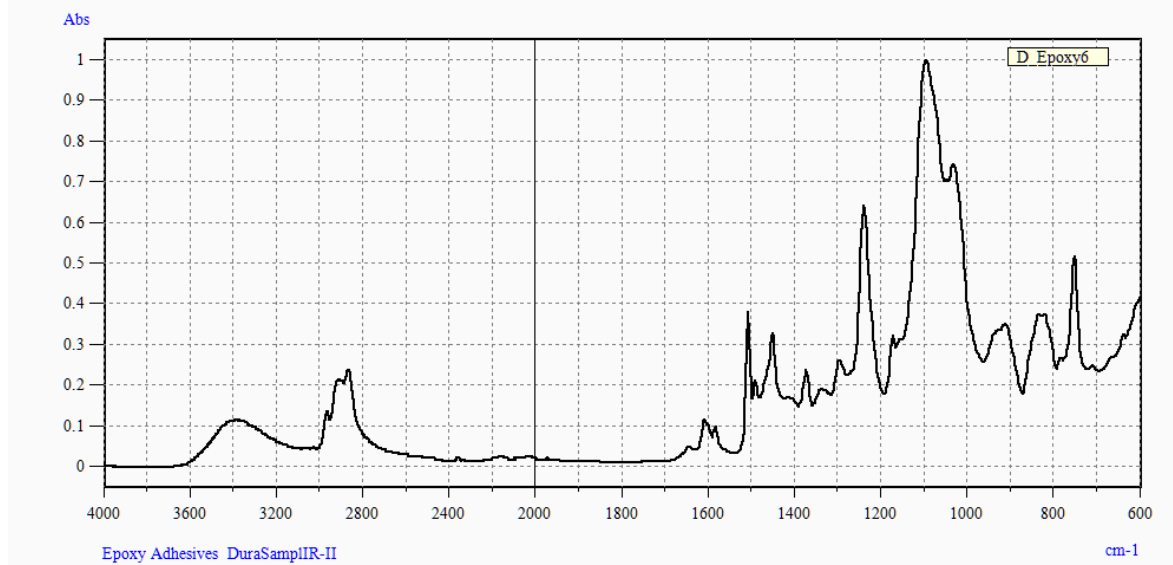

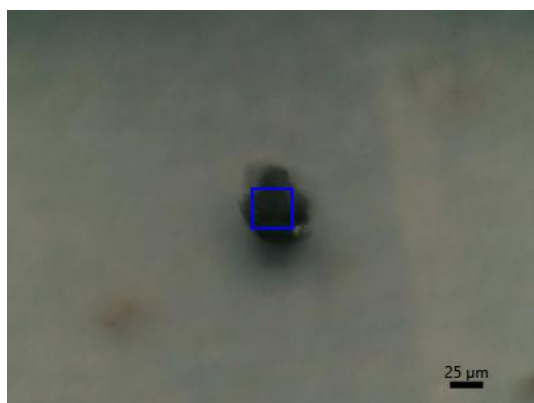

# Search Result Report

Filename : C:\Users\User\Desktop\UTSA  
 samples\UV042821HA11\Point\_Measurement\_Fragment\_117.apit  
 Acquired Datetime : 2022/11/13 01:13:12

● Search Parameters

Library list : Polymer2  
 IRs  
 ATR-Polymer2  
 T-Polymer2  
 Maximum hits: 200  
 Minimum quality : 0  
 Algorithm : DiffDeriv

| Score | Library      | Name | Comment           |
|-------|--------------|------|-------------------|
| 571   | IRs Polymer2 | PP   | PolypropyleneFilm |

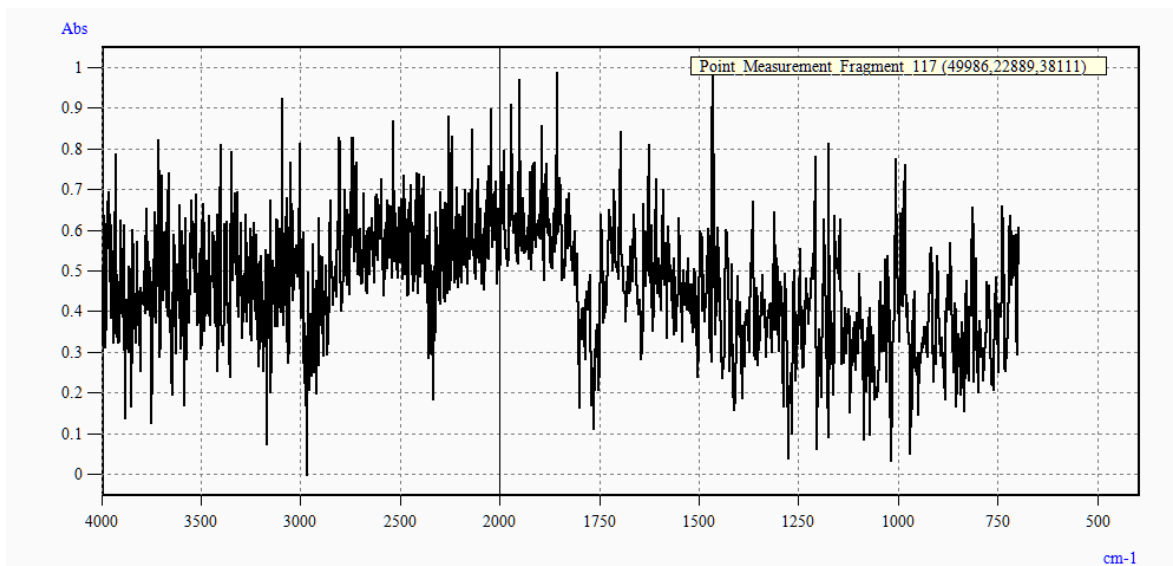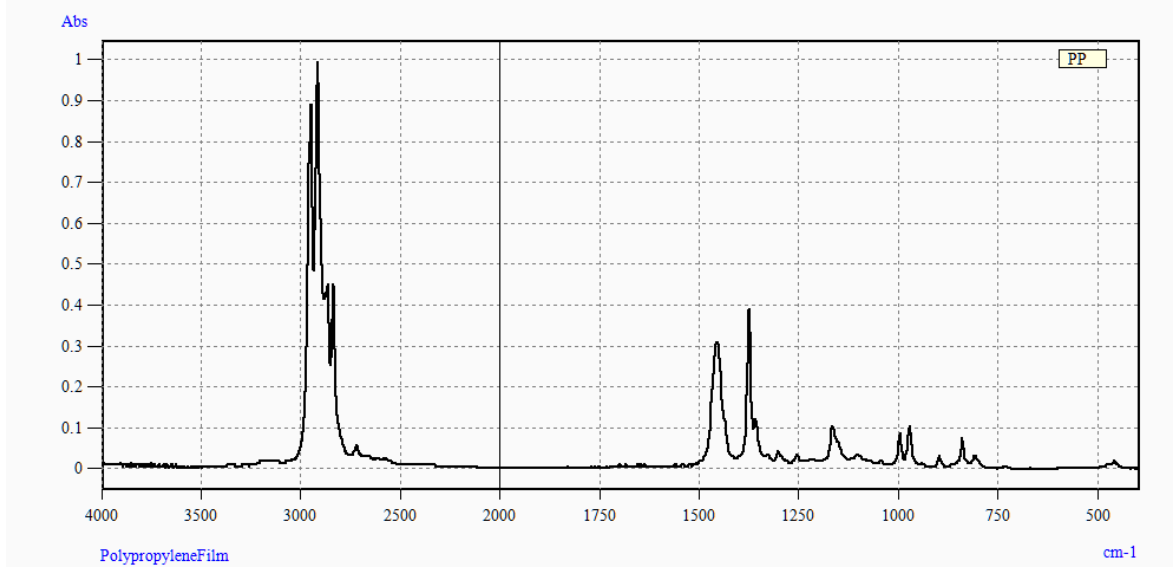

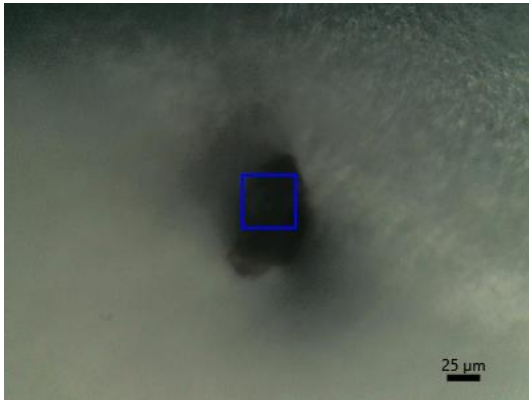

## Search Result Report

Filename : C:\Users\User\Desktop\UTSA  
 samples\UV042821HA11\Point\_Measurement\_Fragment\_118.apit  
 Acquired Datetime : 2022/11/13 01:17:47

### ● Search Parameters

Library list :  
 IRs Polymer2  
 ATR-Polymer2  
 T-Polymer2  
 Maximum hits: 200  
 Minimum quality : 0  
 Algorithm : DiffDeriv

| Score | Library      | Name        | Comment                                          |
|-------|--------------|-------------|--------------------------------------------------|
| 586   | ATR-Polymer2 | D_Additive2 | Polymer Additive(Irganox 1076)<br>DuraSamplIR-II |

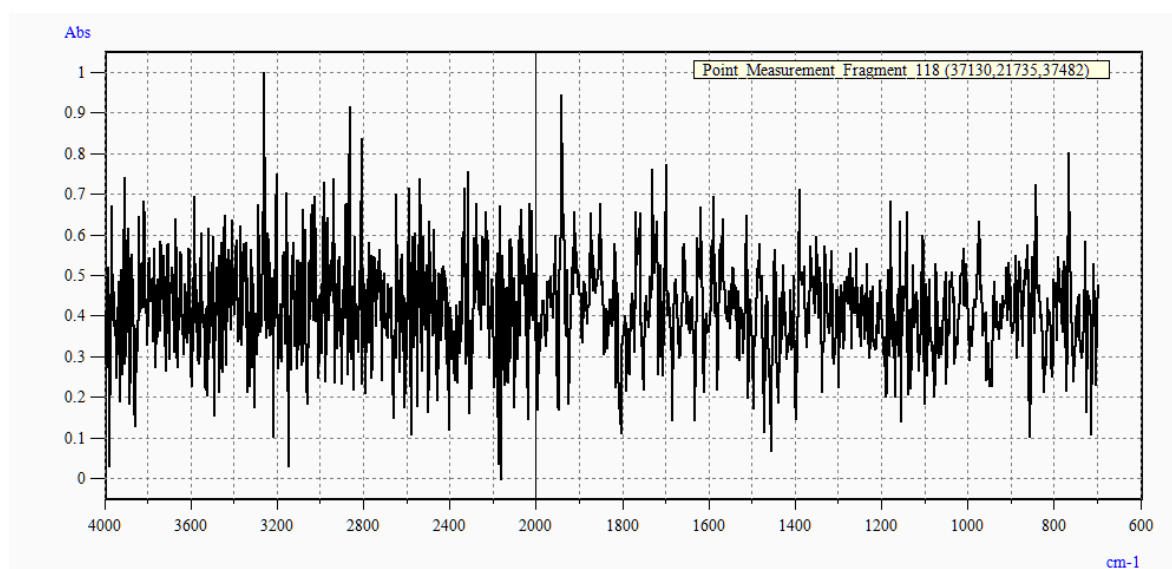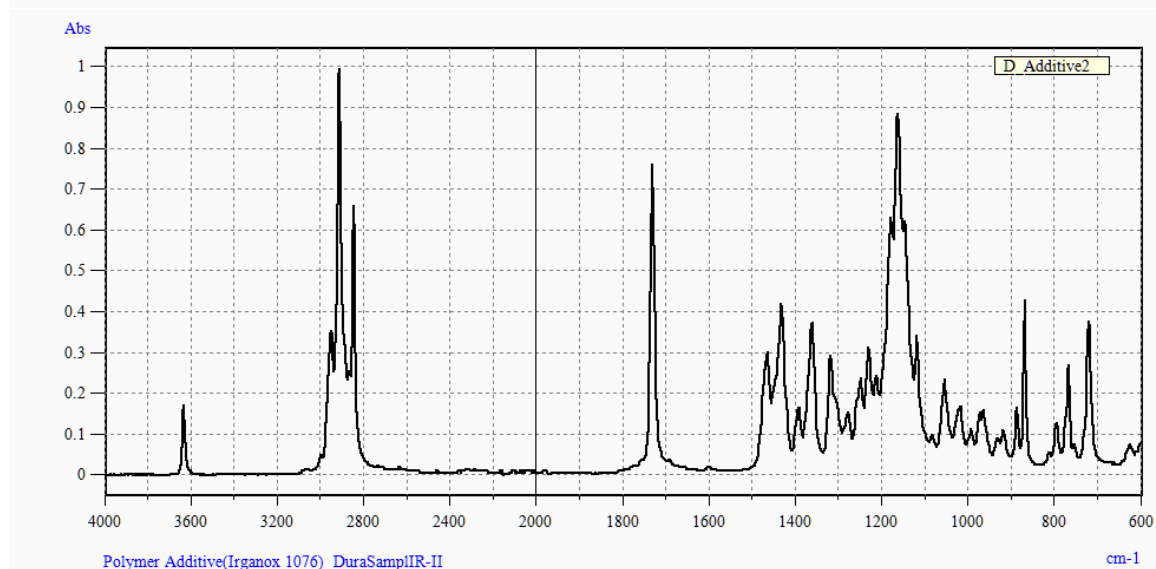

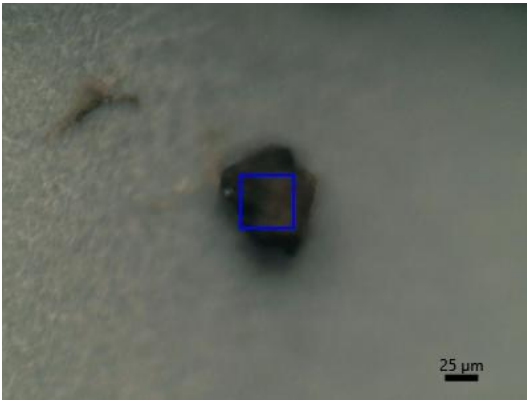

## Search Result Report

Filename : C:\Users\User\Desktop\UTSA  
 samples\UV042821HA11\Point\_Measurement\_Fragment\_119.apit  
 Acquired Datetime : 2022/11/13 01:20:10

### ● Search Parameters

Library list :  
 IRs Polymer2  
 ATR-Polymer2  
 T-Polymer2  
 Maximum hits: 200  
 Minimum quality : 0  
 Algorithm : DiffDeriv

| Score | Library      | Name   | Comment                                   |
|-------|--------------|--------|-------------------------------------------|
| 632   | ATR-Polymer2 | D_PPS2 | Poly(Phenylene Sulfide)<br>DuraSamplIR-II |

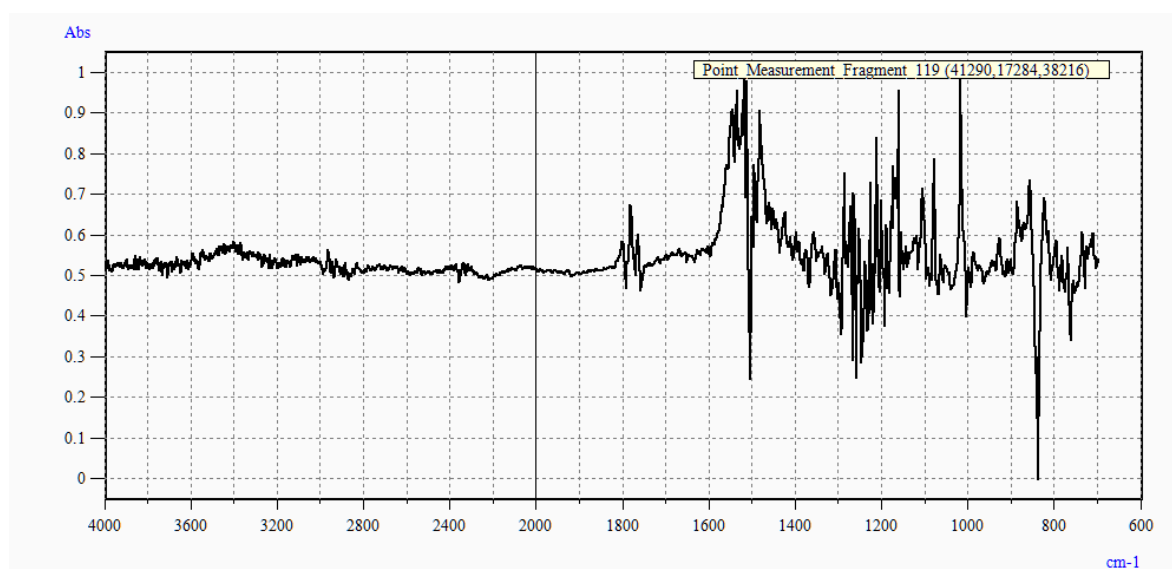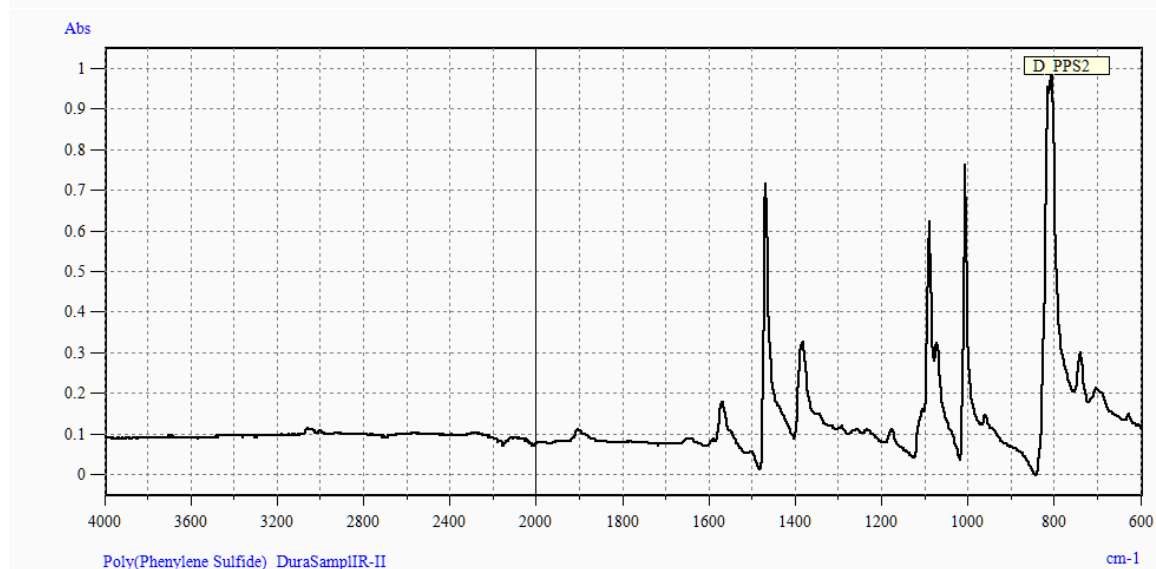

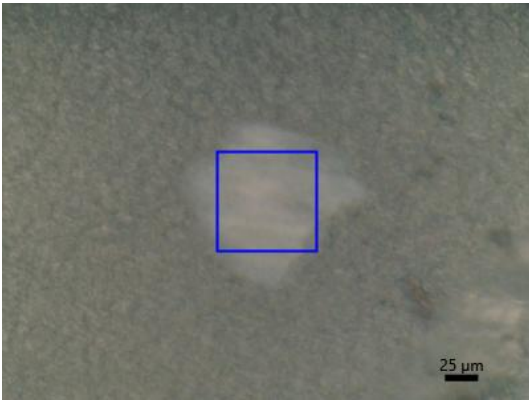

## Search Result Report

Filename : C:\Users\User\Desktop\UTSA  
 samples\UV042821HA11\Point\_Measurement\_Fragment\_120.apit

Acquired Datetime : 2022/11/13 01:26:38

### ● Search Parameters

Library list :

IRs

Polymer2

ATR-Polymer2

T-Polymer2

Maximum hits:

200

Minimum quality :

0

Algorithm : DiffDeriv

| Score | Library      | Name | Comment                                |
|-------|--------------|------|----------------------------------------|
| 576   | IRs Polymer2 | PS   | PolystyreneATR/diamond<br>ATRcorrected |

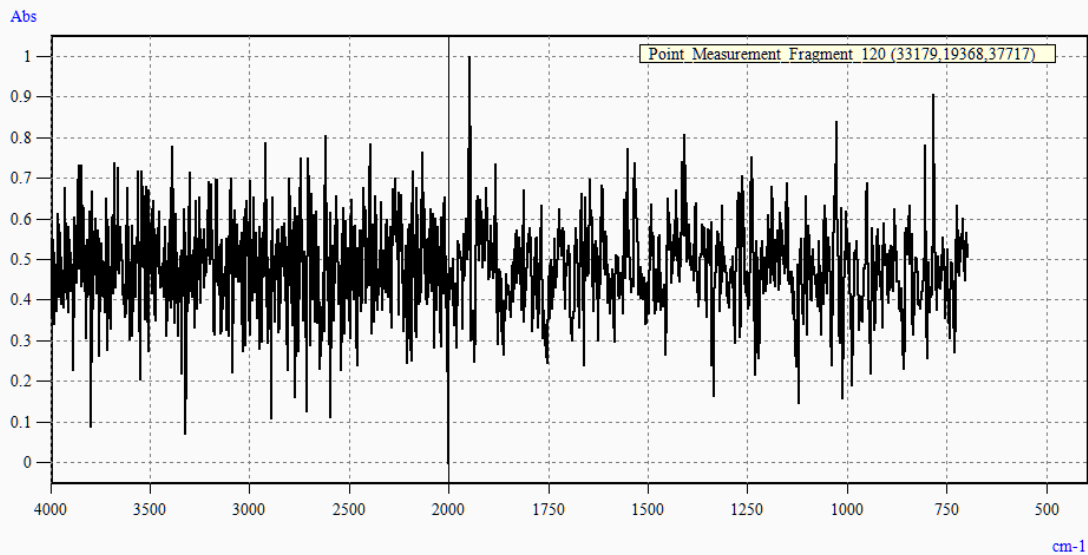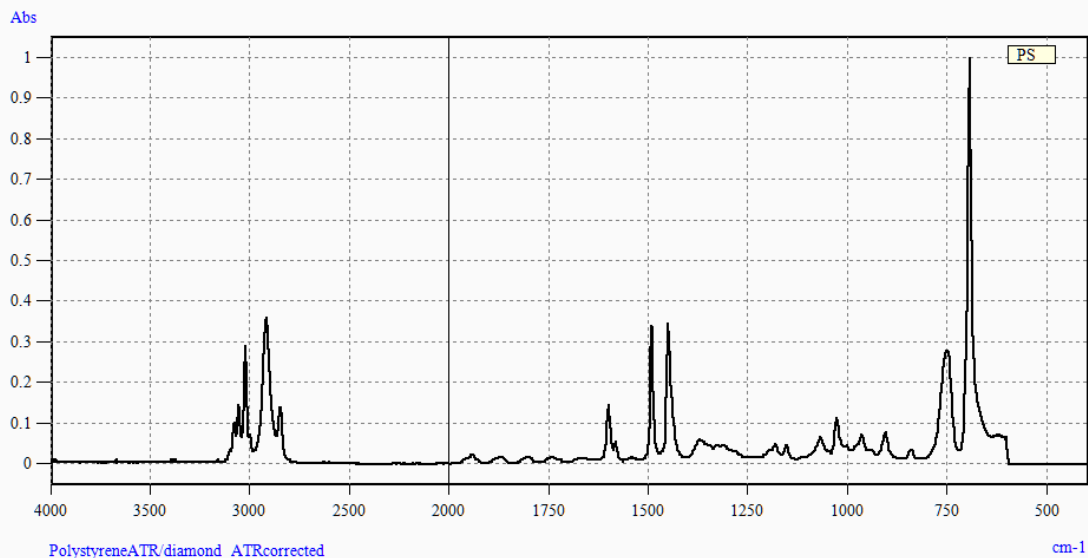

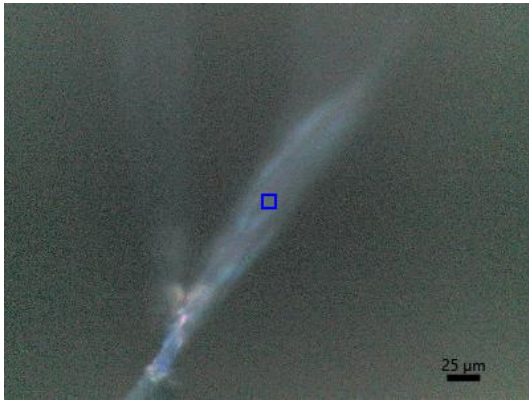

# Search Result Report

Filename : C:\Users\User\Desktop\UTSA  
 samples\UV042821HA11\Point\_Measurement\_Fragment\_121.apit  
 Acquired Datetime : 2022/11/13 01:36:23

● **Search Parameters**

Library list :  
 IRs Polymer2  
 ATR-Polymer2  
 T-Polymer2  
 Maximum hits: 200  
 Minimum quality : 0  
 Algorithm : DiffDeriv

| Score | Library      | Name     | Comment                                           |
|-------|--------------|----------|---------------------------------------------------|
| 612   | ATR-Polymer2 | D_Epoxy1 | Epoxy Resin(Electronic Parts-1)<br>DuraSamplIR-II |

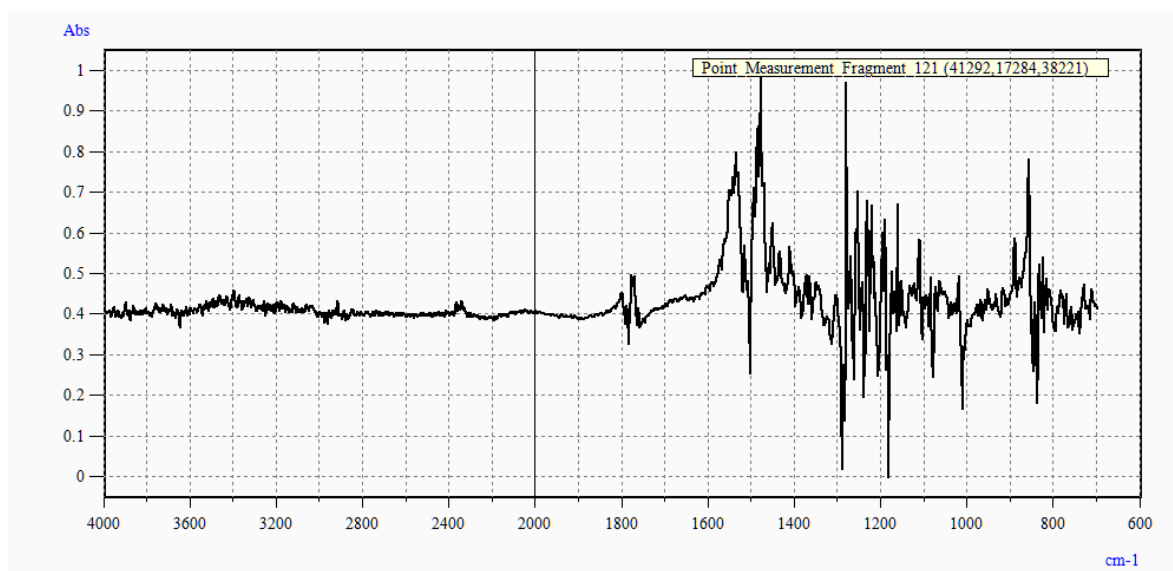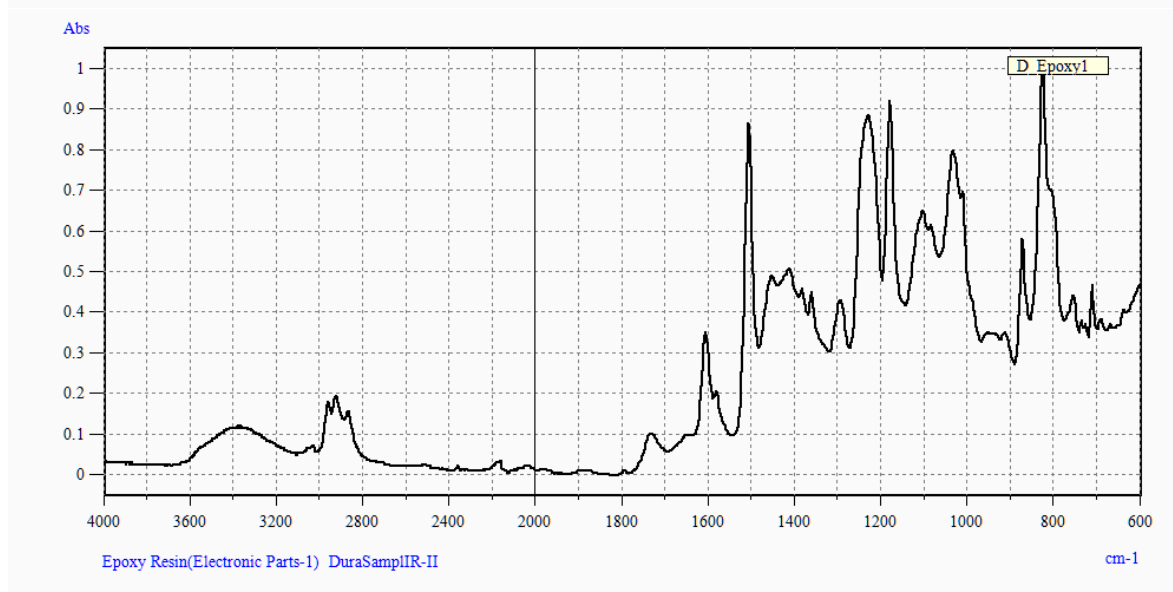

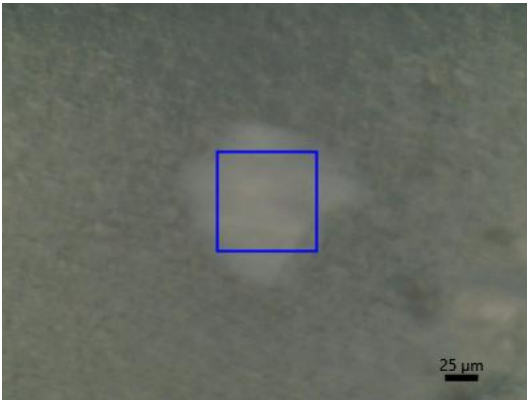

## Search Result Report

Filename : C:\Users\User\Desktop\UTSA  
 samples\UV042821HA11\Point\_Measurement\_Fragment\_122.apit  
 Acquired Datetime : 2022/11/13 01:40:40

### ● Search Parameters

Library list :  
 IRs Polymer2  
 ATR-Polymer2  
 T-Polymer2  
 Maximum hits: 200  
 Minimum quality : 0  
 Algorithm : DiffDeriv

| Score | Library      | Name | Comment                                                                                    |
|-------|--------------|------|--------------------------------------------------------------------------------------------|
| 581   | IRs Polymer2 | PIP  | Polyisoprene [-CH <sub>2</sub> CH(CH <sub>3</sub> )=CHCH <sub>2</sub> -] <sub>n</sub> Film |

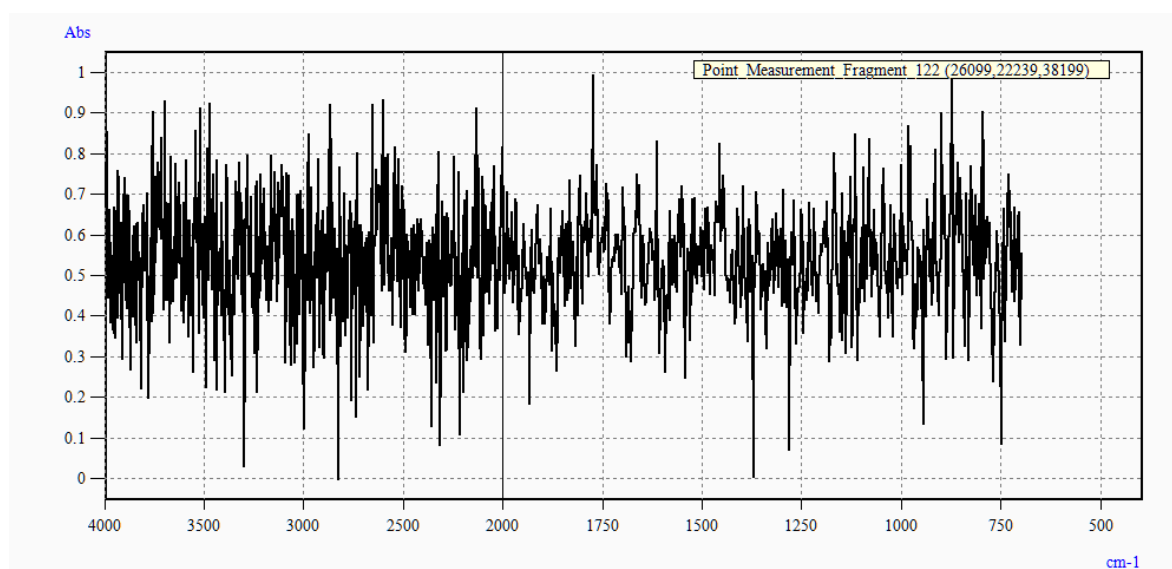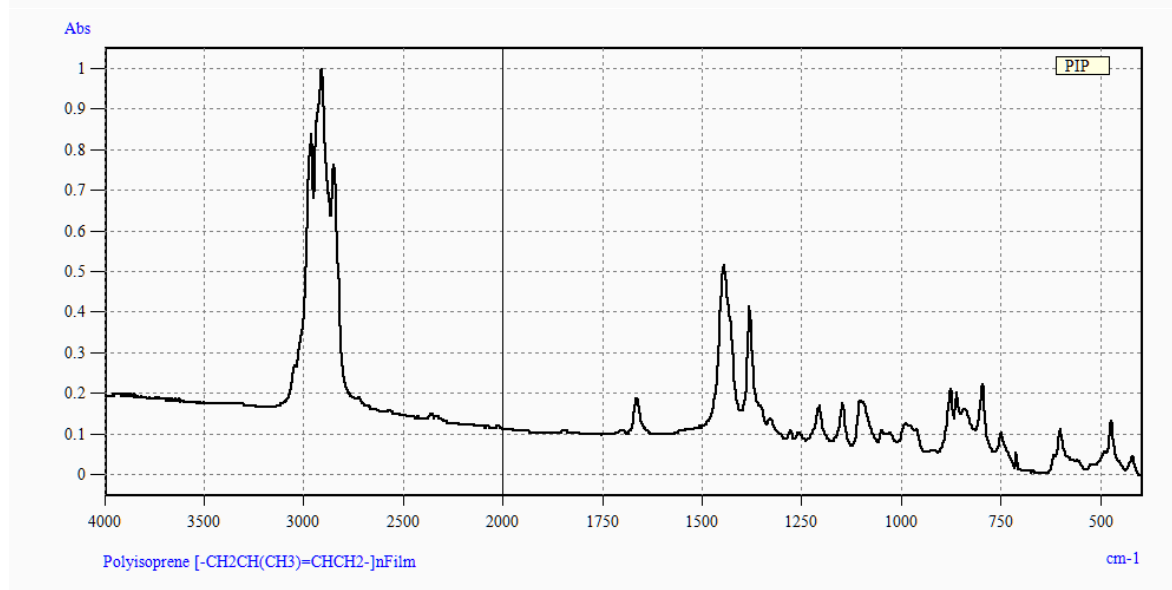

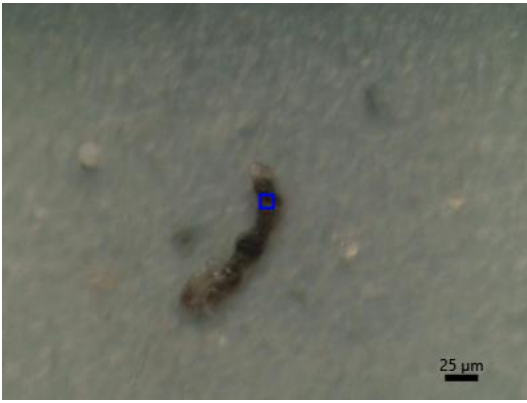

# Search Result Report

Filename : C:\Users\User\Desktop\UTSA  
 samples\UV042821HA11\Point\_Measurement\_Fragment\_123.apit  
 Acquired Datetime : 2022/11/13 01:46:45

● Search Parameters

Library list :  
 IRs Polymer2  
 ATR-Polymer2  
 T-Polymer2  
 Maximum hits: 200  
 Minimum quality : 0  
 Algorithm : DiffDeriv

| Score | Library      | Name | Comment  |
|-------|--------------|------|----------|
| 590   | IRs Polymer2 | PPS  | PPS Film |

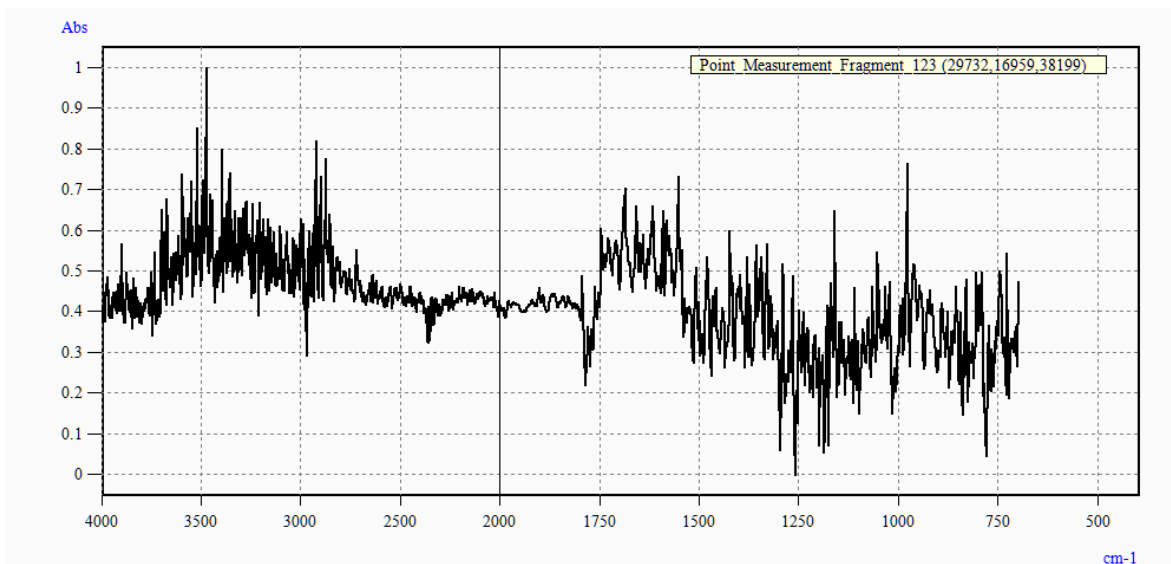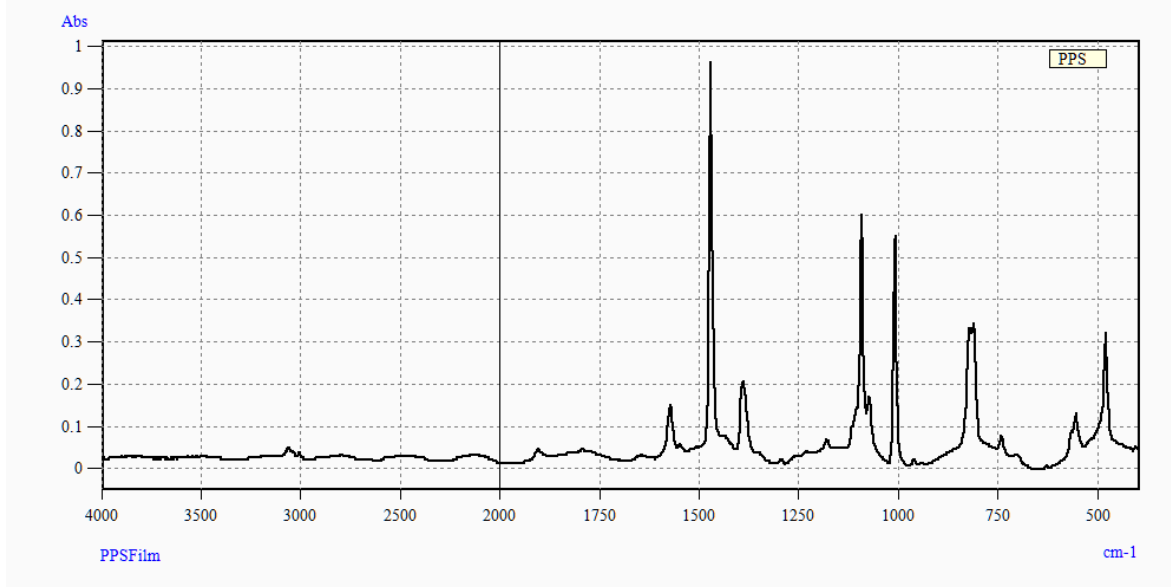

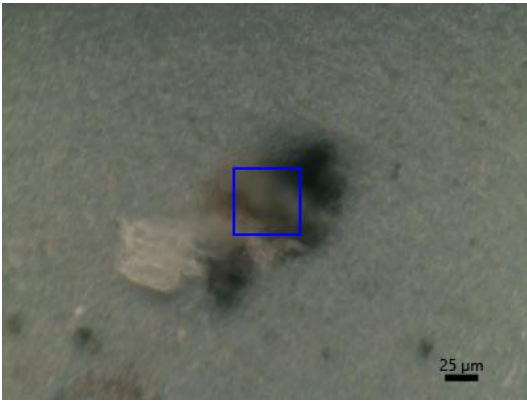

# Search Result Report

Filename : C:\Users\User\Desktop\UTSA  
 samples\UV042821HA11\Point\_Measurement\_Fragment\_124.apit  
 Acquired Datetime : 2022/11/13 01:48:42

● **Search Parameters**

Library list :  
 IRs Polymer2  
 ATR-Polymer2  
 T-Polymer2  
 Maximum hits: 200  
 Minimum quality : 0  
 Algorithm : DiffDeriv

| Score | Library    | Name   | Comment                                 |
|-------|------------|--------|-----------------------------------------|
| 602   | T-Polymer2 | Epoxy7 | Epoxy Resin<br>Transmission(Microscope) |

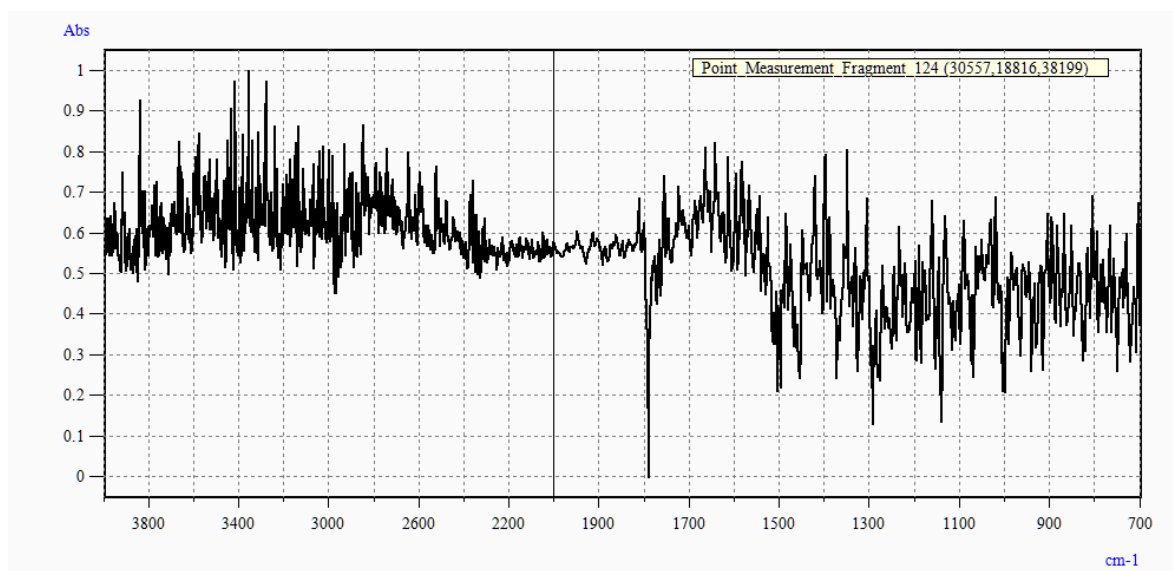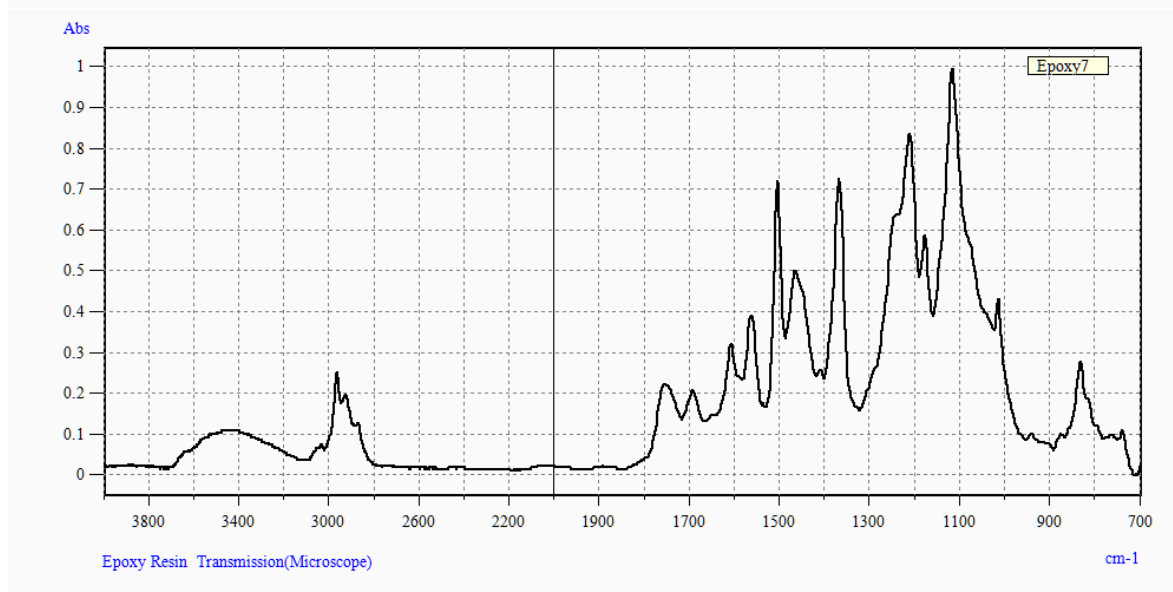

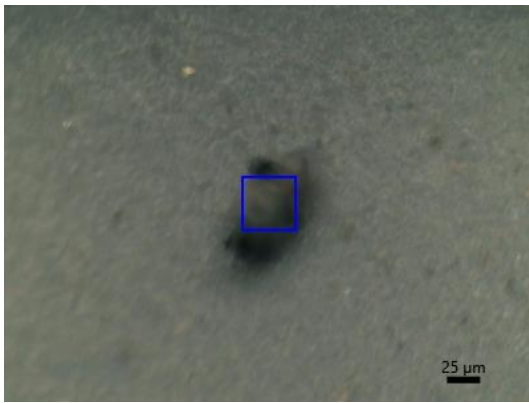

## Search Result Report

Filename : C:\Users\User\Desktop\UTSA samples\UV042821HA12\Point  
\_Measure\_Fragment\_100.apit

Acquired Datetime : 2022/11/12 23:14:02

### ● Search Parameters

Library list :

IRs

Polymer2

ATR-Polymer2

T-Polymer2

Maximum hits:

200

Minimum quality :

0

Algorithm : DiffDeriv

| Score | Library    | Name                                | Comment                                                                                         |
|-------|------------|-------------------------------------|-------------------------------------------------------------------------------------------------|
| 579   | T-Polymer2 | T_PVC with<br>PhenoricSulfonicEster | Polyvinylchloride with Phenolic<br>ester of aliphatic sulfonic acid<br>Transmission(Microscope) |

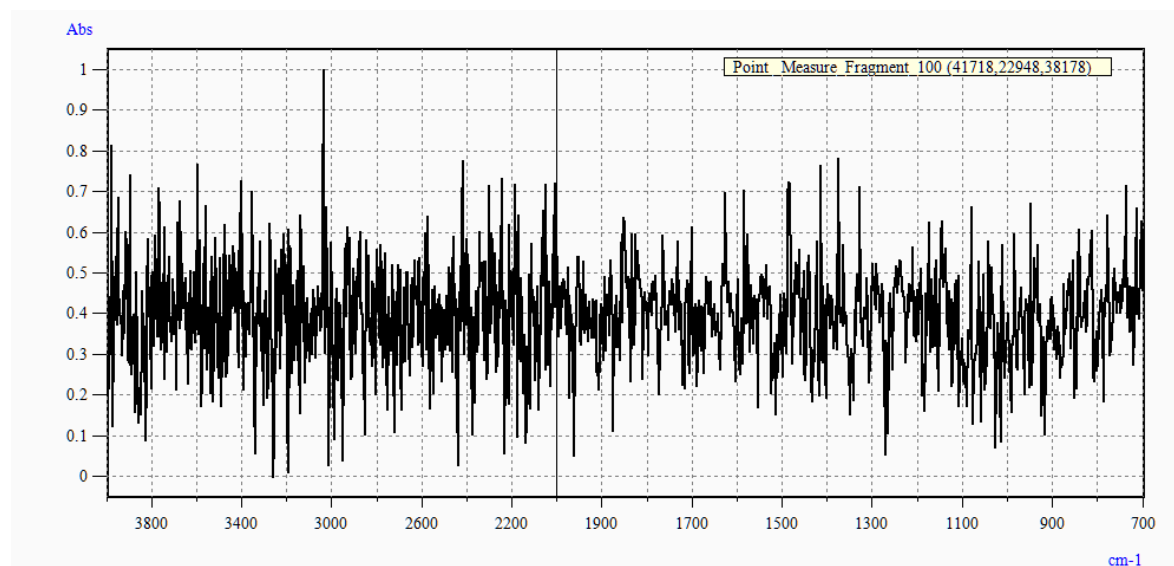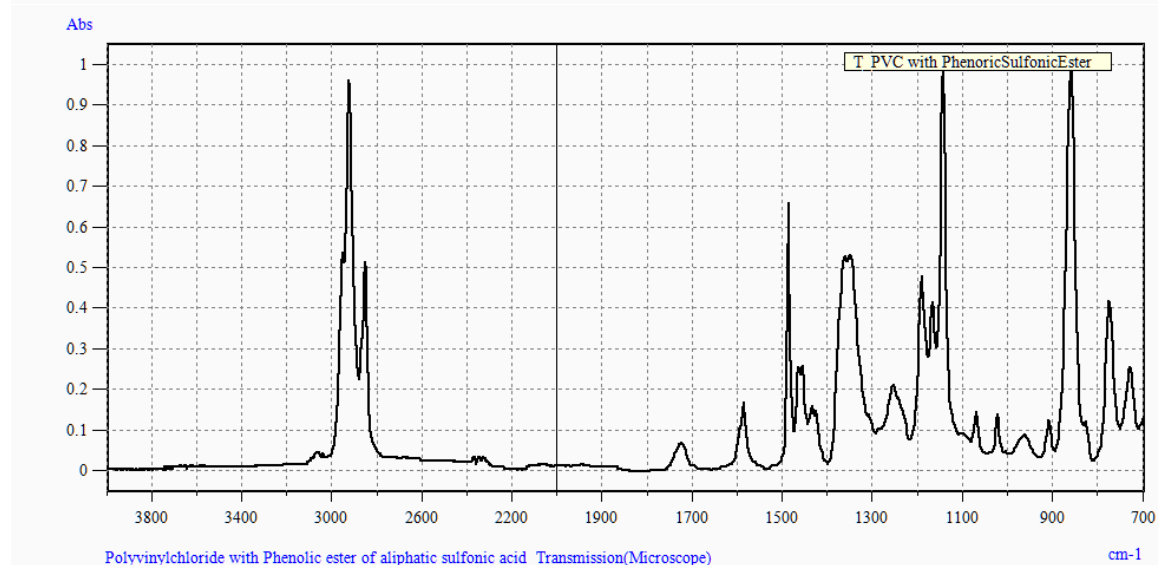

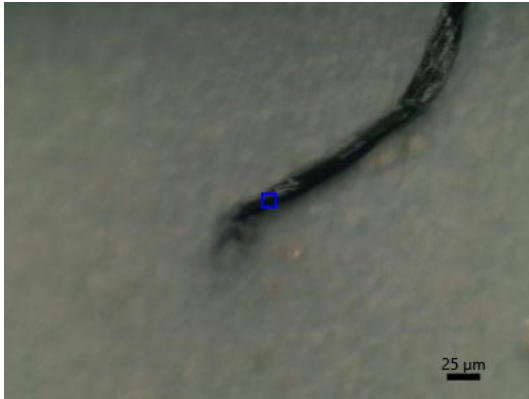

## Search Result Report

Filename : C:\Users\User\Desktop\UTSA samples\UV042821HA12\Point  
\_Measure\_Fragment\_101.apit

Acquired Datetime : 2022/11/12 23:16:54

### ● Search Parameters

Library list :

IRs

Polymer2

ATR-Polymer2

T-Polymer2

Maximum hits:

200

Minimum quality :

0

Algorithm : DiffDeriv

| Score | Library    | Name | Comment                                               |
|-------|------------|------|-------------------------------------------------------|
| 598   | T-Polymer2 | PPS  | Polyphenylene Sulfie(PPS)<br>Transmission(Microscope) |

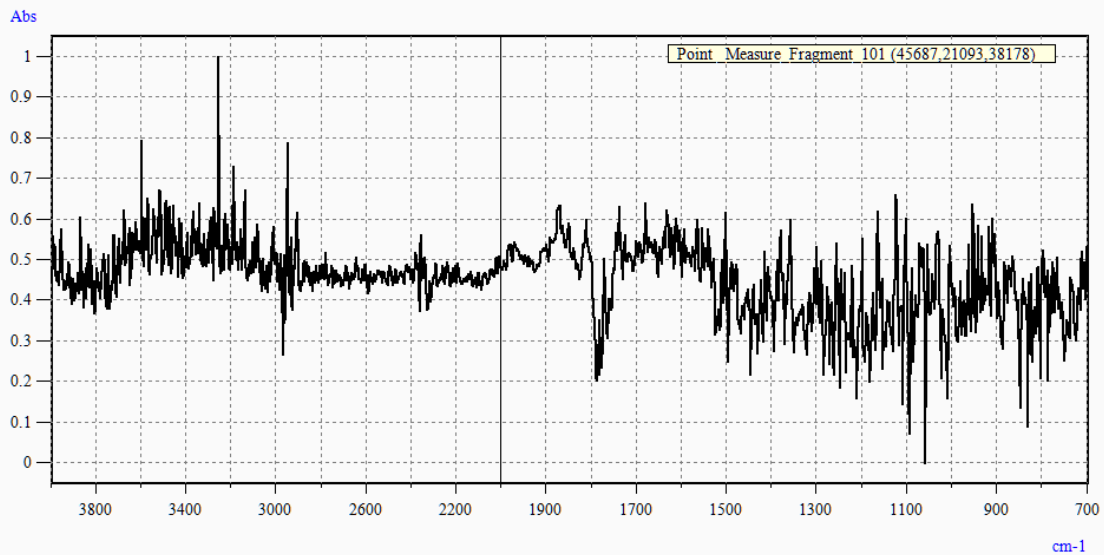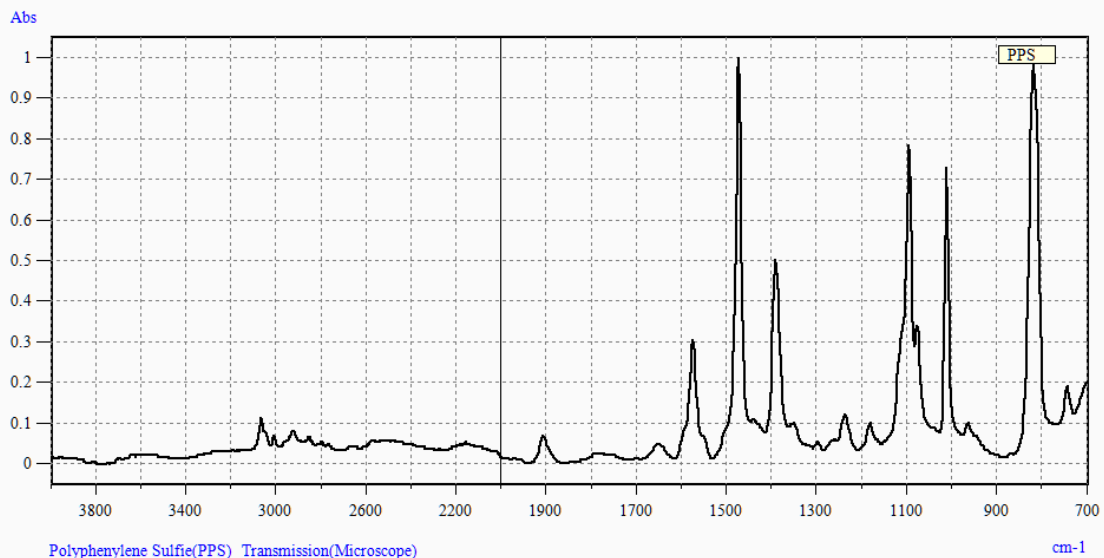

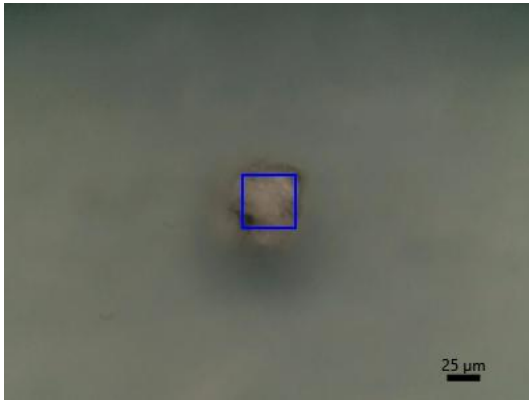

# Search Result Report

Filename : C:\Users\User\Desktop\UTSA samples\UV042821HA12\Point  
 \_Measure\_Fragment\_102.apit

Acquired Datetime : 2022/11/12 23:19:09

● **Search Parameters**

Library list :  
 IRs Polymer2  
 ATR-Polymer2  
 T-Polymer2  
 Maximum hits: 200  
 Minimum quality : 0  
 Algorithm : DiffDeriv

| Score | Library    | Name  | Comment                                     |
|-------|------------|-------|---------------------------------------------|
| 581   | T-Polymer2 | Epoxy | Epoxy Adhesives<br>Transmission(Microscope) |

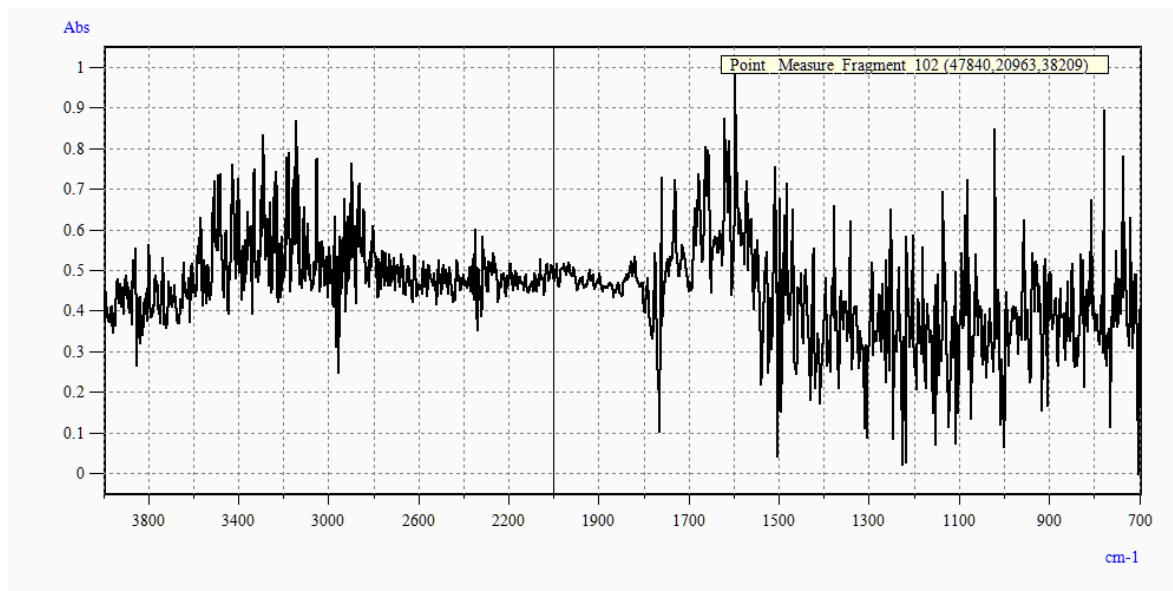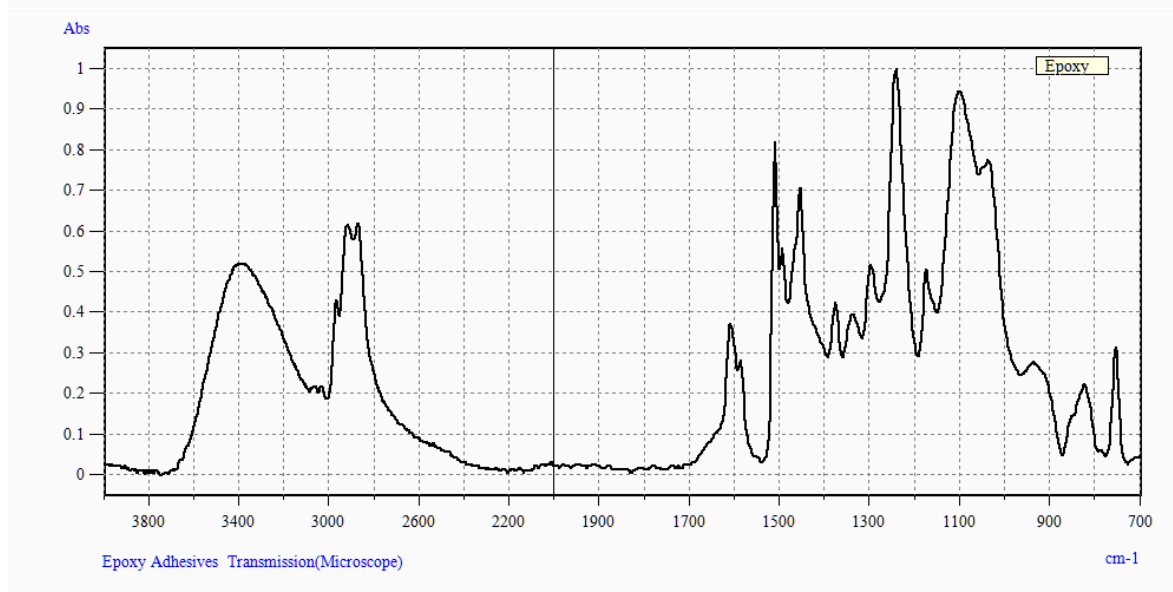

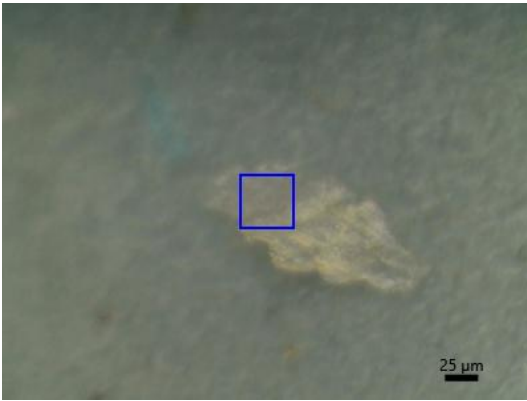

## Search Result Report

Filename : C:\Users\User\Desktop\UTSA samples\UV042821HA12\Point  
\_Measure\_Fragment\_103.apit

Acquired Datetime : 2022/11/12 23:22:09

### ● Search Parameters

Library list :

IRs

Polymer2

ATR-Polymer2

T-Polymer2

Maximum hits:

200

Minimum quality :

0

Algorithm : DiffDeriv

| Score | Library      | Name   | Comment                                         |
|-------|--------------|--------|-------------------------------------------------|
| 592   | ATR-Polymer2 | D_PVDF | Polyvinylidene Fluoride(PVDF)<br>DuraSamplIR-II |

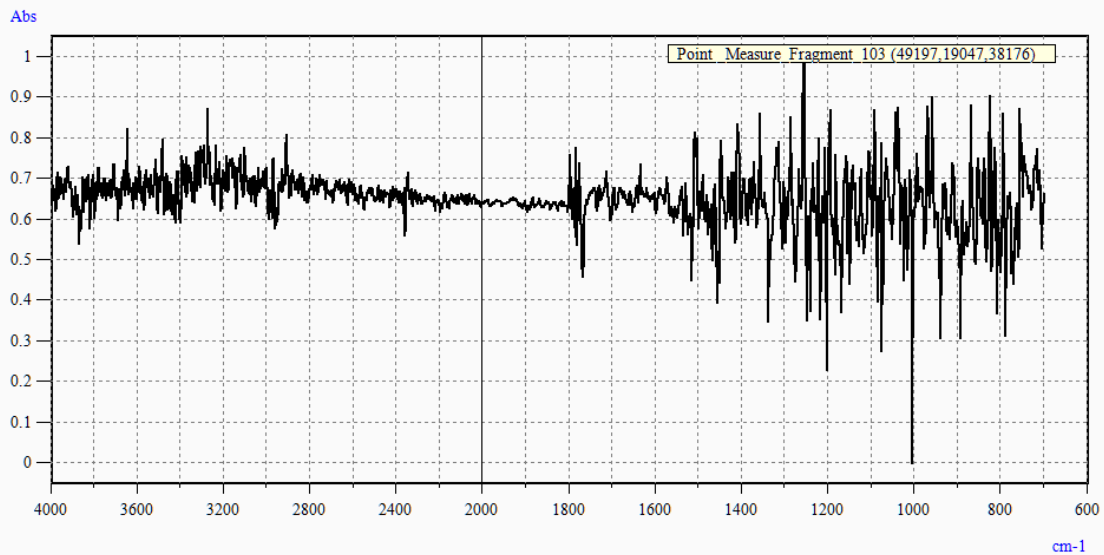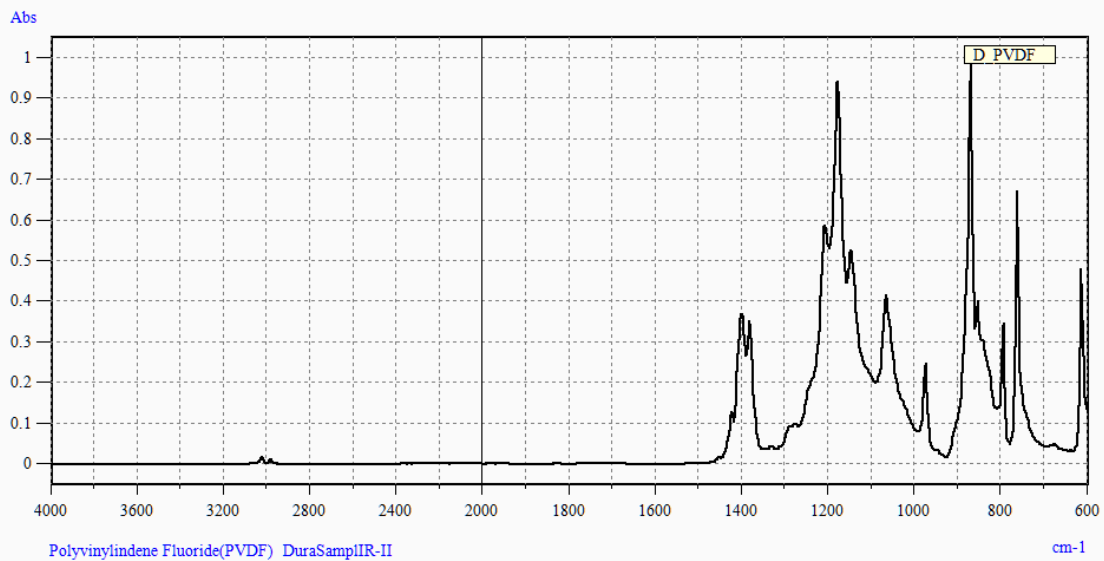

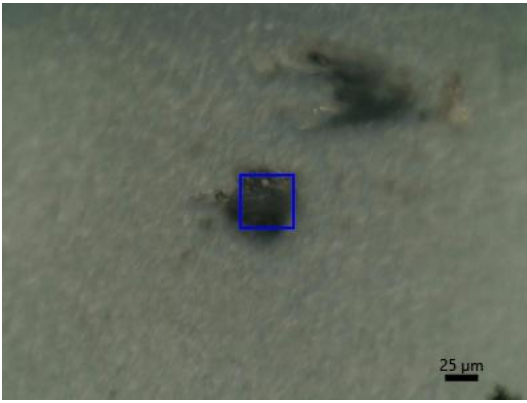

## Search Result Report

Filename : C:\Users\User\Desktop\UTSA samples\UV042821HA12\Point  
\_Measure\_Fragment\_104.apit

Acquired Datetime : 2022/11/12 23:23:10

### ● Search Parameters

Library list :

IRs

Polymer2

ATR-Polymer2

T-Polymer2

Maximum hits:

200

Minimum quality :

0

Algorithm : DiffDeriv

| Score | Library      | Name        | Comment                                           |
|-------|--------------|-------------|---------------------------------------------------|
| 613   | ATR-Polymer2 | D_Additive7 | Polymer Additive(Chimassorb 944LD) DuraSamplIR-II |

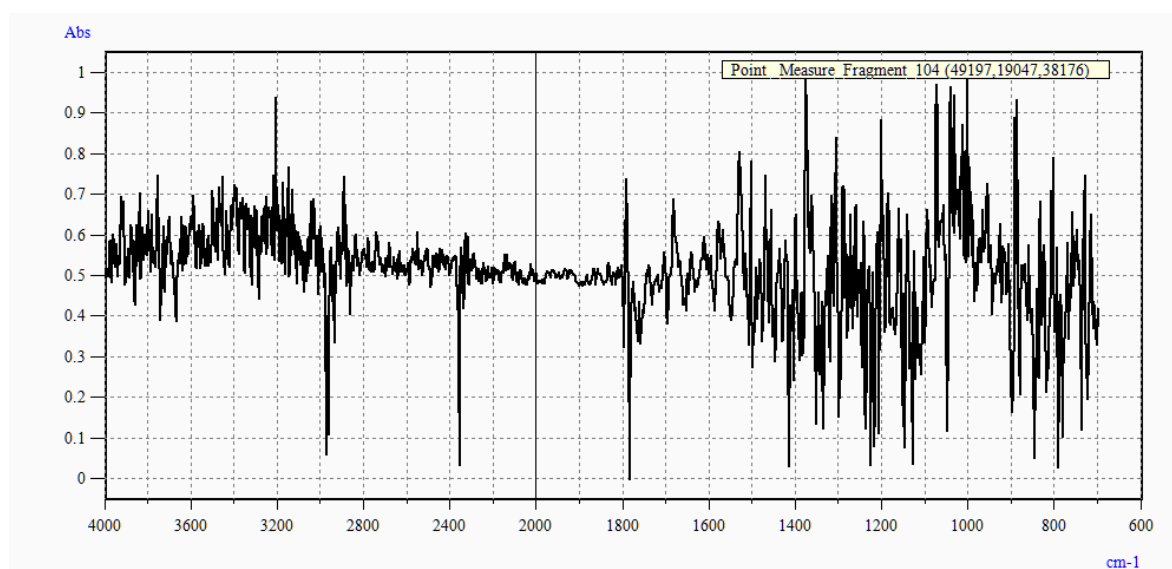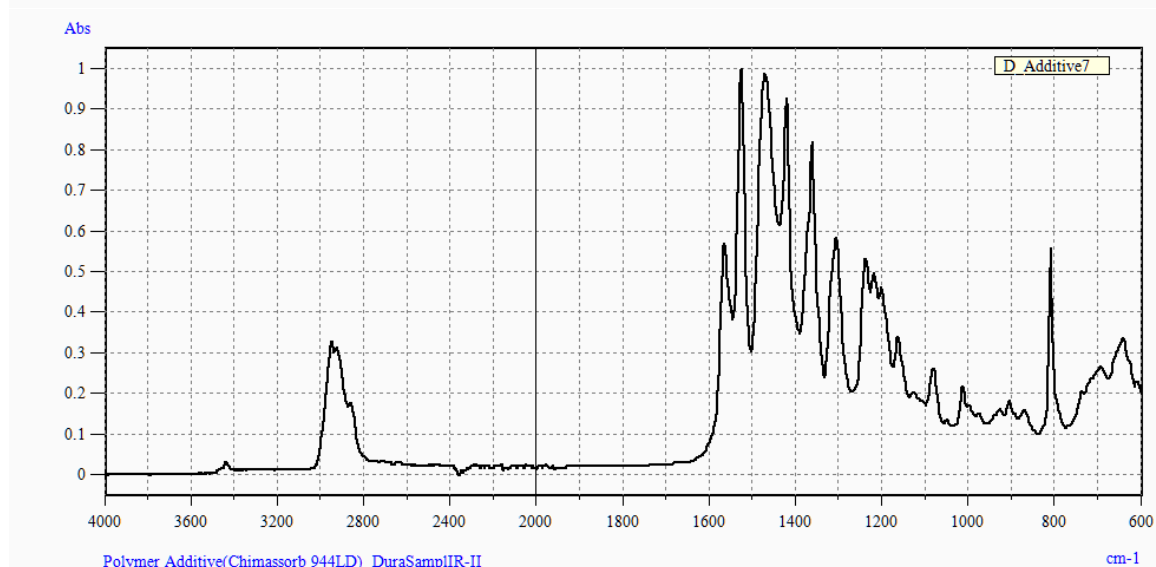

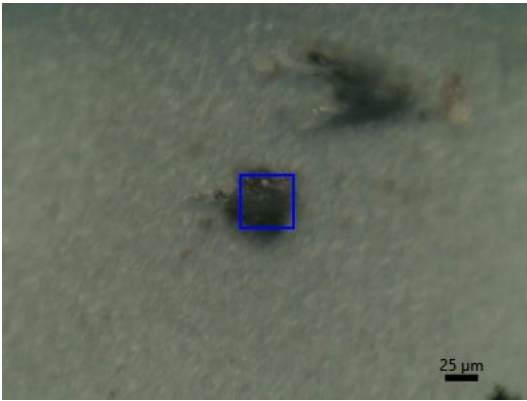

## Search Result Report

Filename : C:\Users\User\Desktop\UTSA samples\UV042821HA12\Point  
\_Measure\_Fragment\_105.apit

Acquired Datetime : 2022/11/12 23:26:48

### ● Search Parameters

Library list :

IRs

Polymer2

ATR-Polymer2

T-Polymer2

Maximum hits:

200

Minimum quality :

0

Algorithm : DiffDeriv

| Score | Library    | Name | Comment                                      |
|-------|------------|------|----------------------------------------------|
| 581   | T-Polymer2 | PAR  | Polyarylate(PAR)<br>Transmission(Microscope) |

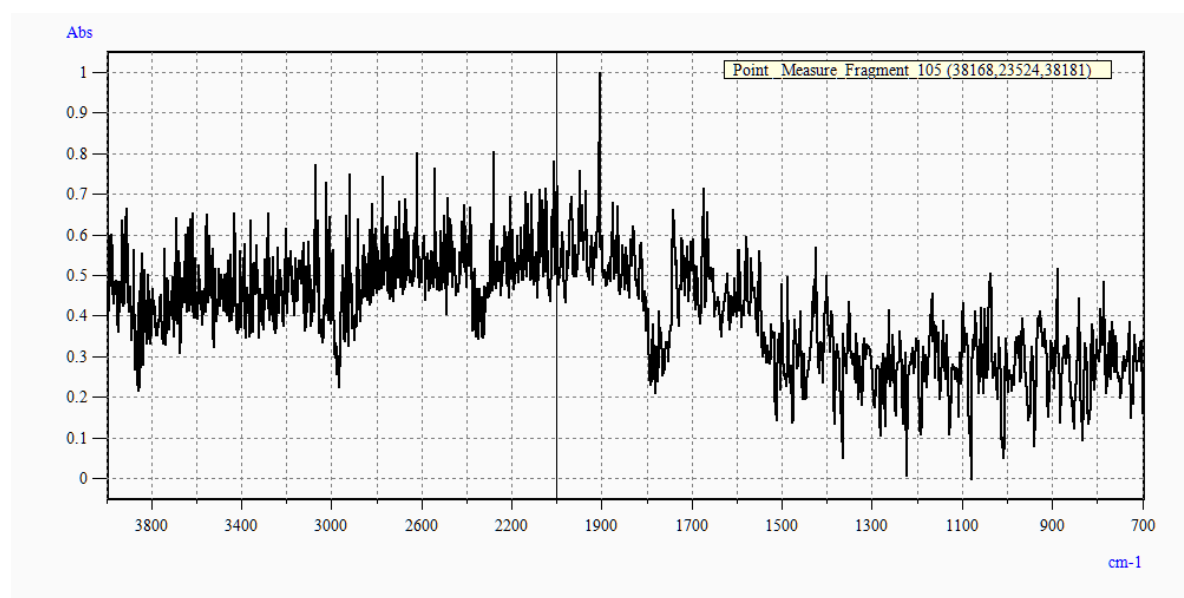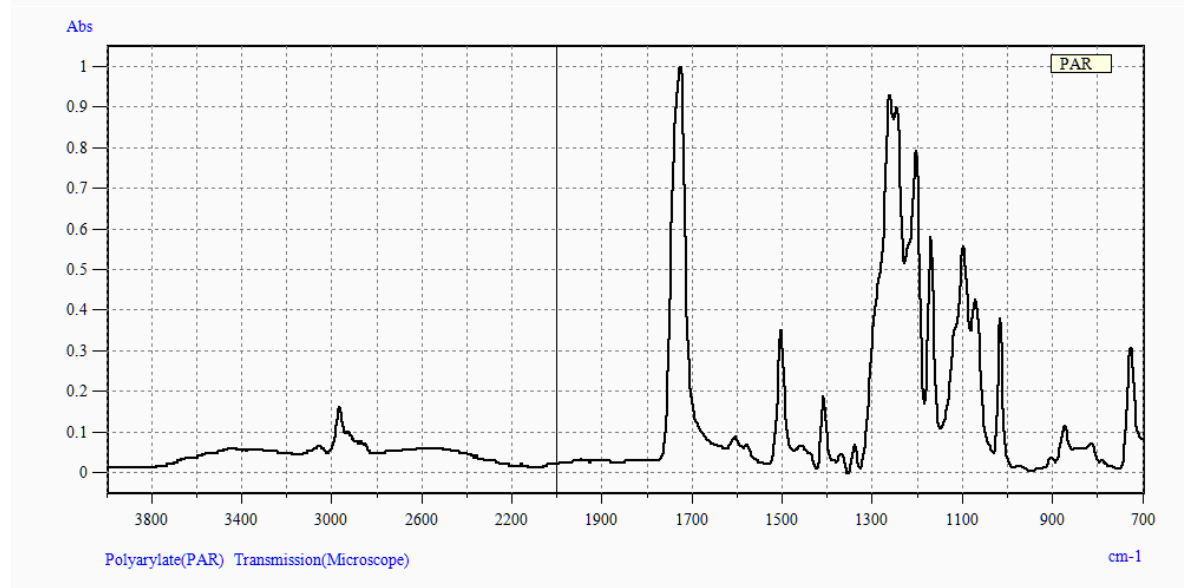

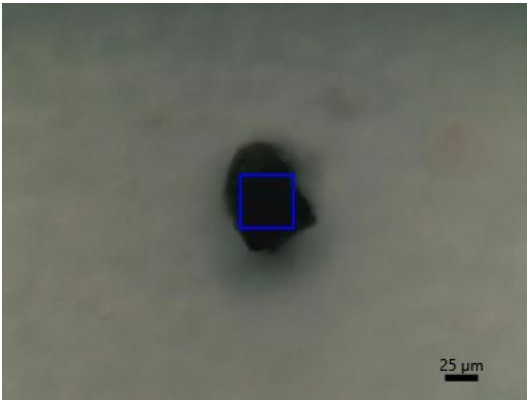

## Search Result Report

Filename : C:\Users\User\Desktop\UTSA samples\UV042821HA12\Point  
\_Measure\_Fragment\_106.apit

Acquired Datetime : 2022/11/12 23:34:22

### ● Search Parameters

Library list :

IRs

Polymer2

ATR-Polymer2

T-Polymer2

Maximum hits:

200

Minimum quality :

0

Algorithm : DiffDeriv

| Score | Library      | Name                       | Comment                                      |
|-------|--------------|----------------------------|----------------------------------------------|
| 608   | ATR-Polymer2 | D_PVC with PhthalicEster 1 | Polyvinylchloride with Phthalate DuraSamplIR |

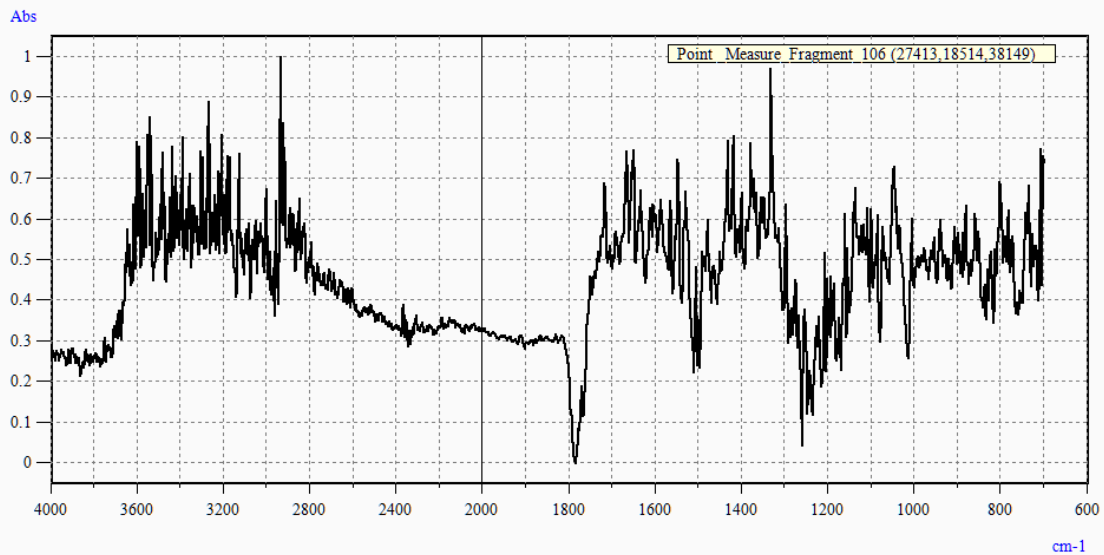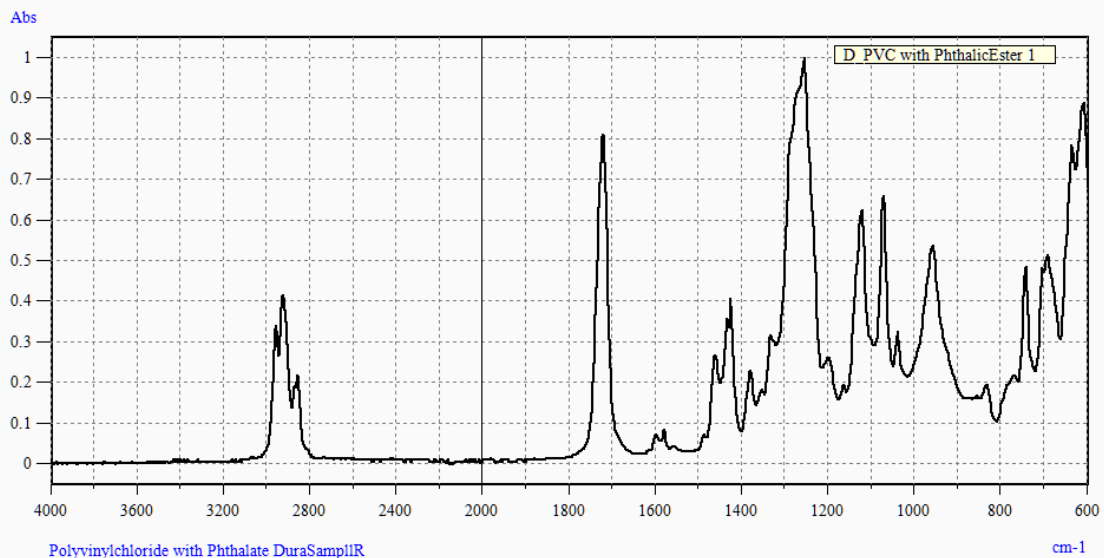

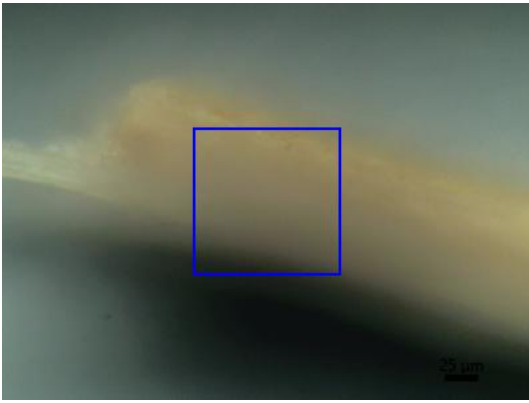

## Search Result Report

Filename : C:\Users\User\Desktop\UTSA samples\UV042821HA12\Point  
\_Measure\_Fragment\_107.apit

Acquired Datetime : 2022/11/12 23:38:17

### ● Search Parameters

Library list :

IRs

Polymer2

ATR-Polymer2

T-Polymer2

Maximum hits:

200

Minimum quality :

0

Algorithm : DiffDeriv

| Score | Library    | Name         | Comment                                                    |
|-------|------------|--------------|------------------------------------------------------------|
| 595   | T-Polymer2 | Irganox 1330 | Polymer Additive(Irganox 1330)<br>Transmission(Microscope) |

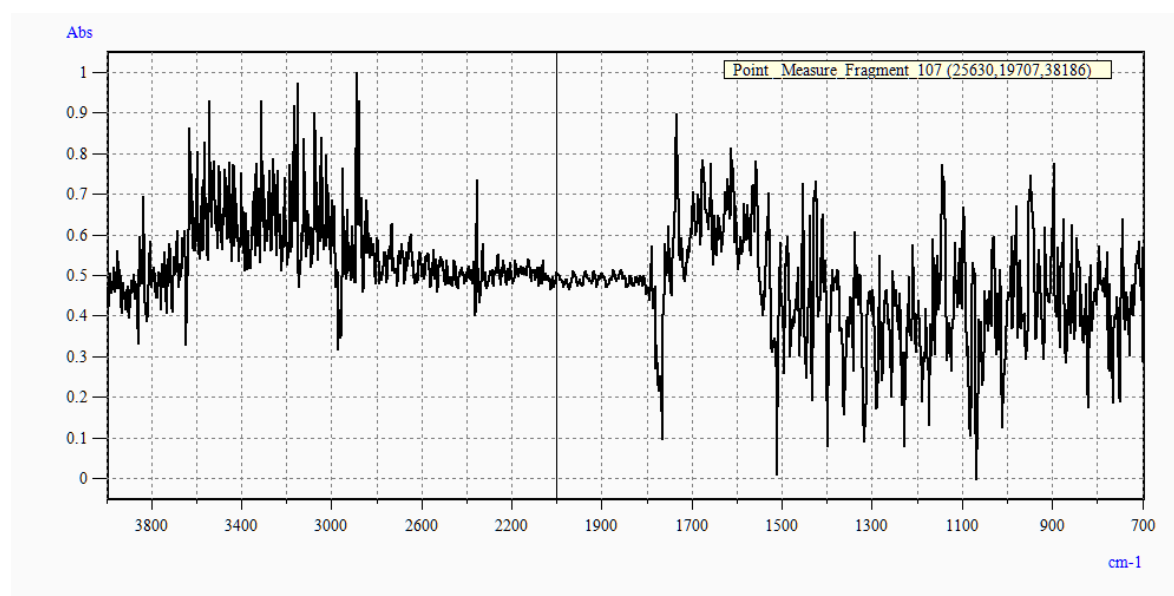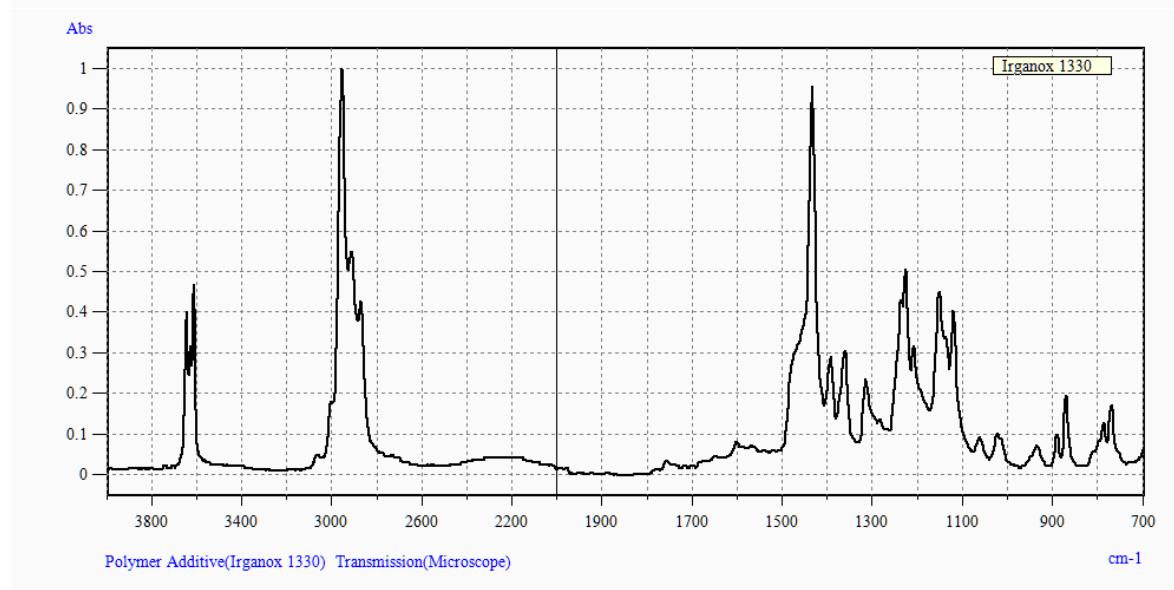

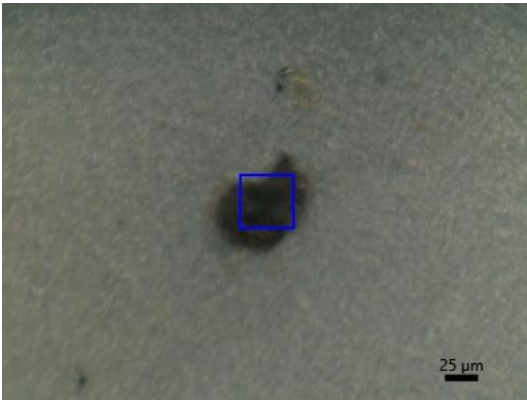

## Search Result Report

Filename : C:\Users\User\Desktop\UTSA samples\UV042821HA12\Point  
\_Measure\_Fragment\_108.apit

Acquired Datetime : 2022/11/12 23:43:53

### ● Search Parameters

Library list :

IRs

Polymer2

ATR-Polymer2

T-Polymer2

Maximum hits:

200

Minimum quality :

0

Algorithm : DiffDeriv

| Score | Library      | Name | Comment                          |
|-------|--------------|------|----------------------------------|
| 682   | ATR-Polymer2 | D_PC | Polycarbonate(PC) DuraSamplIR-II |

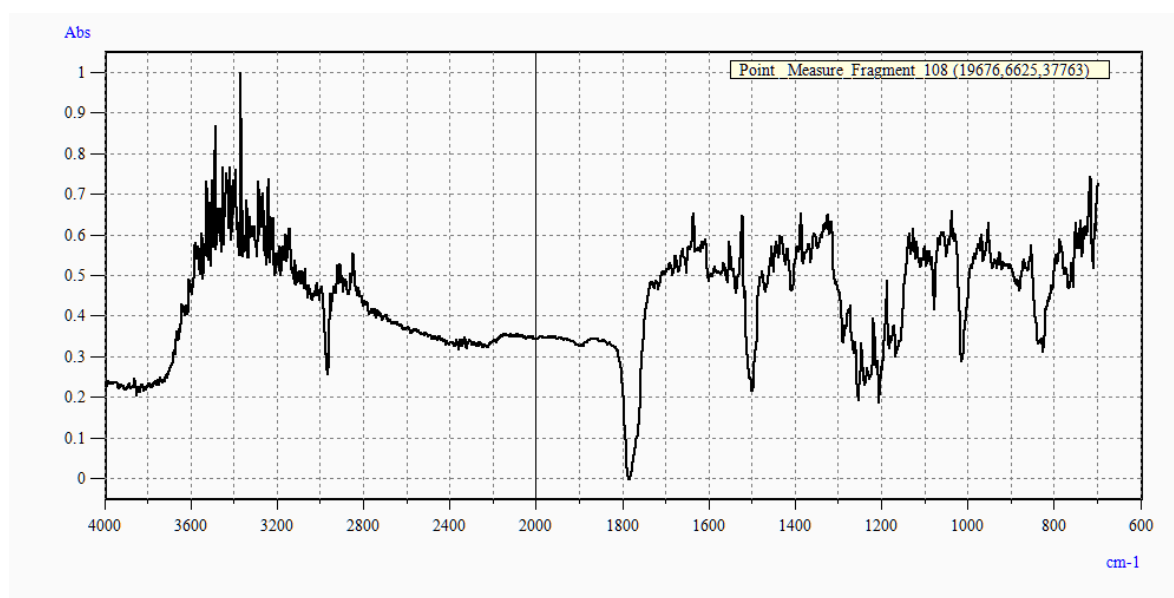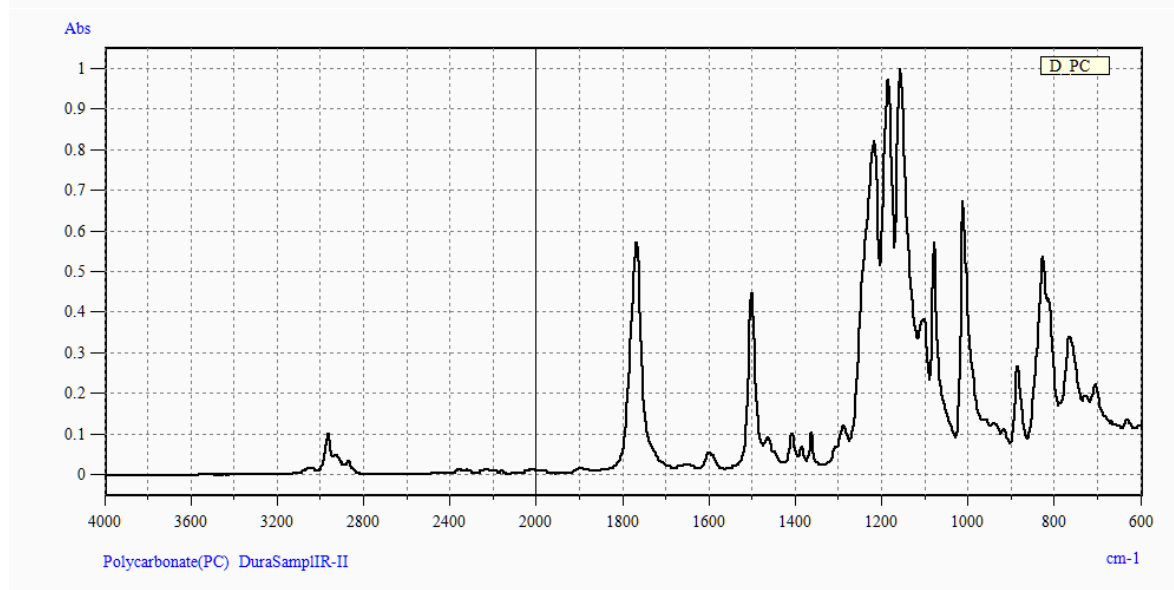

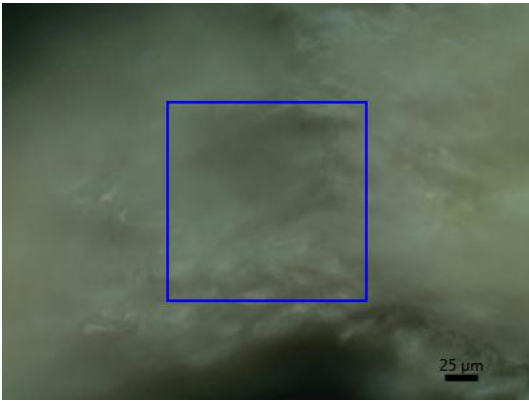

## Search Result Report

Filename : C:\Users\User\Desktop\UTSA samples\UV042821HA12\Point  
\_Measure\_Fragment\_109.apit

Acquired Datetime : 2022/11/12 23:47:22

### ● Search Parameters

Library list :

IRs

Polymer2

ATR-Polymer2

T-Polymer2

Maximum hits:

200

Minimum quality :

0

Algorithm : DiffDeriv

| Score | Library      | Name        | Comment                                         |
|-------|--------------|-------------|-------------------------------------------------|
| 600   | ATR-Polymer2 | D_Additive6 | Polymer Additive(Sanol LS770)<br>DuraSamplIR-II |

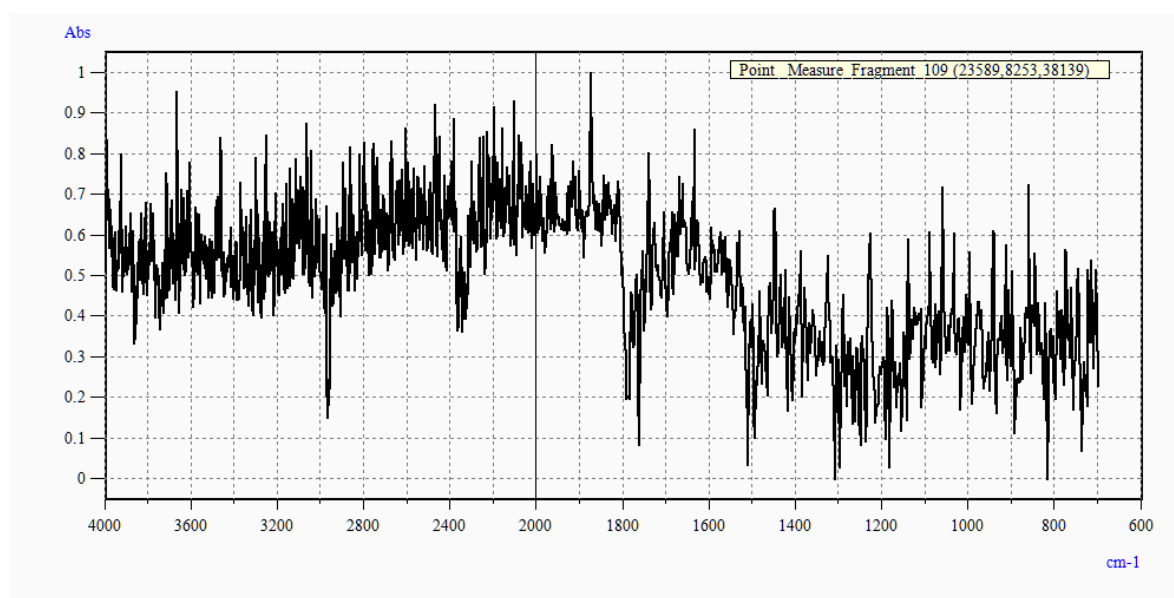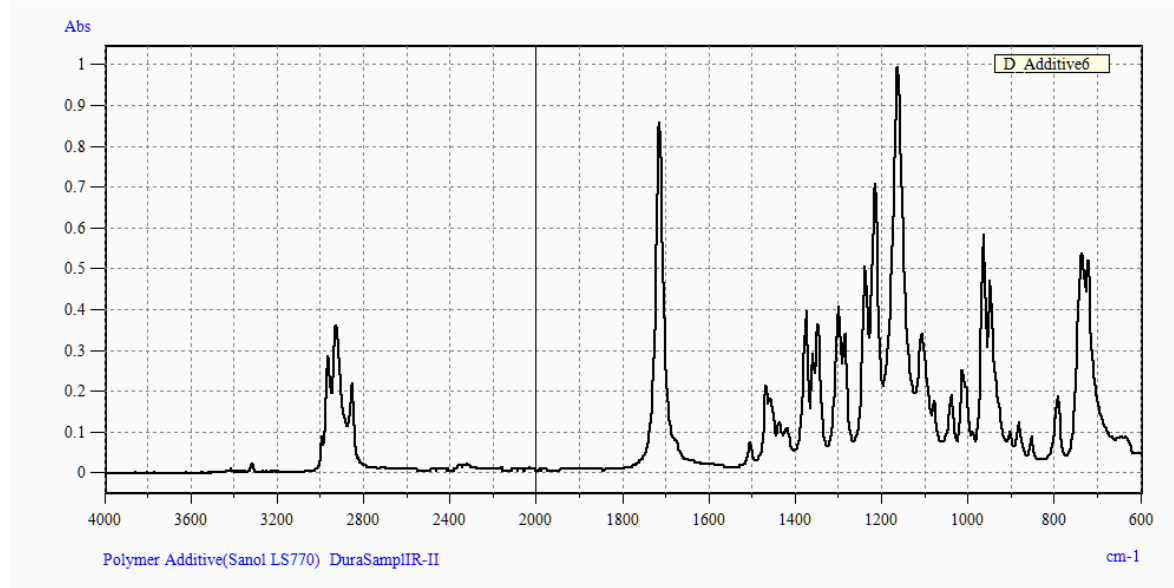

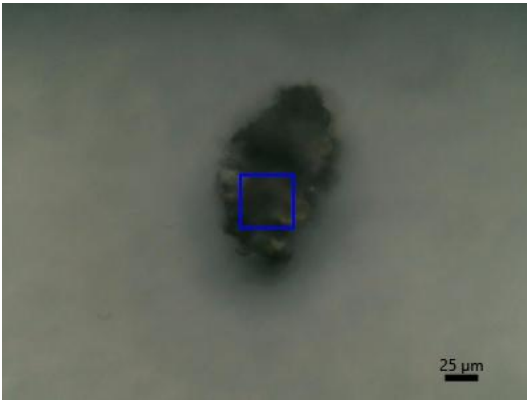

## Search Result Report

Filename : C:\Users\User\Desktop\UTSA samples\UV042821HA12\Point  
\_Measure\_Fragment\_110.apit

Acquired Datetime : 2022/11/12 23:49:07

### ● Search Parameters

Library list :

IRs

Polymer2

ATR-Polymer2

T-Polymer2

Maximum hits:

200

Minimum quality :

0

Algorithm : DiffDeriv

| Score | Library      | Name  | Comment                             |
|-------|--------------|-------|-------------------------------------|
| 592   | ATR-Polymer2 | D_PI1 | Polyimide(UPILEX)<br>DuraSamplIR-II |

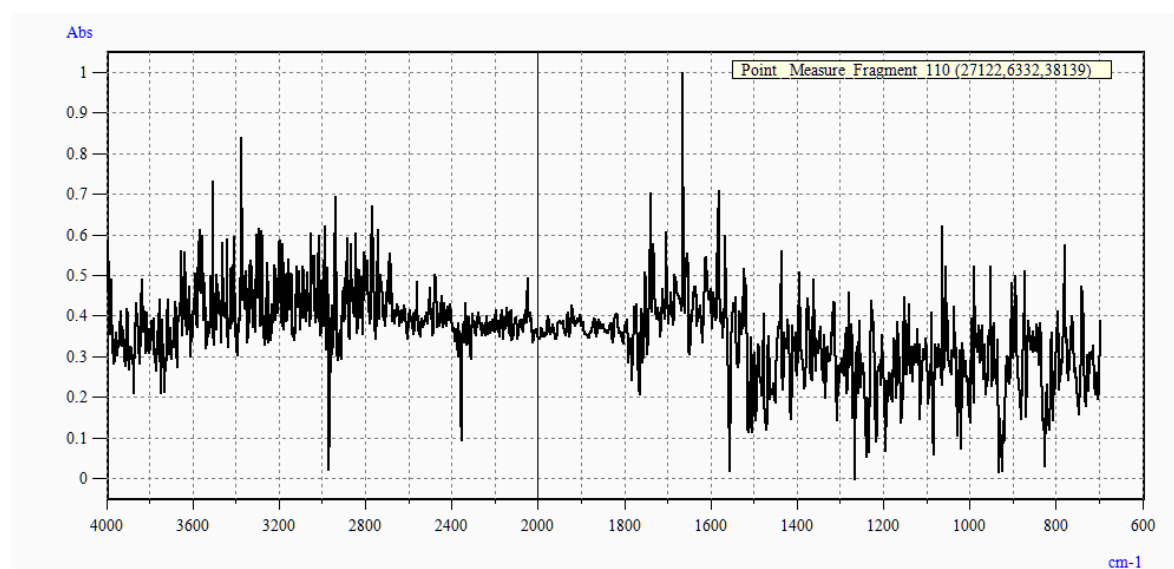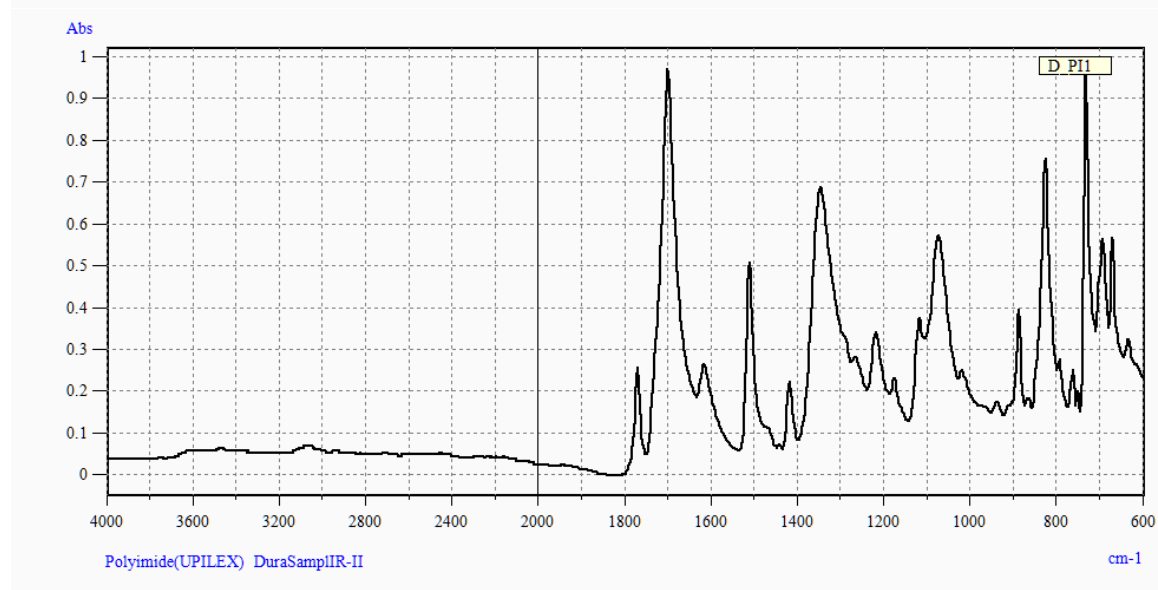

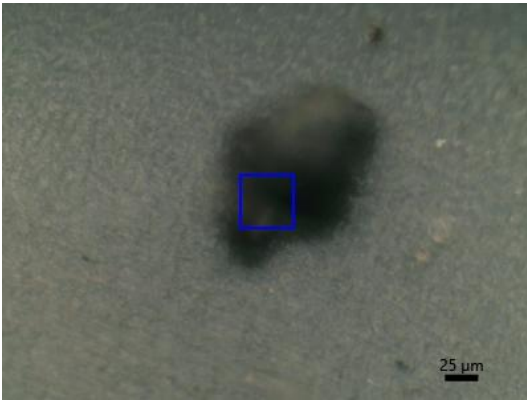

# Search Result Report

Filename : C:\Users\User\Desktop\UTSA samples\UV042821HA12\Point  
 \_Measure\_Fragment\_111.apit

Acquired Datetime : 2022/11/12 23:50:53

● **Search Parameters**

Library list :  
 IRs Polymer2  
 ATR-Polymer2  
 T-Polymer2  
 Maximum hits: 200  
 Minimum quality : 0  
 Algorithm : DiffDeriv

| Score | Library    | Name  | Comment                                     |
|-------|------------|-------|---------------------------------------------|
| 599   | T-Polymer2 | Epoxy | Epoxy Adhesives<br>Transmission(Microscope) |

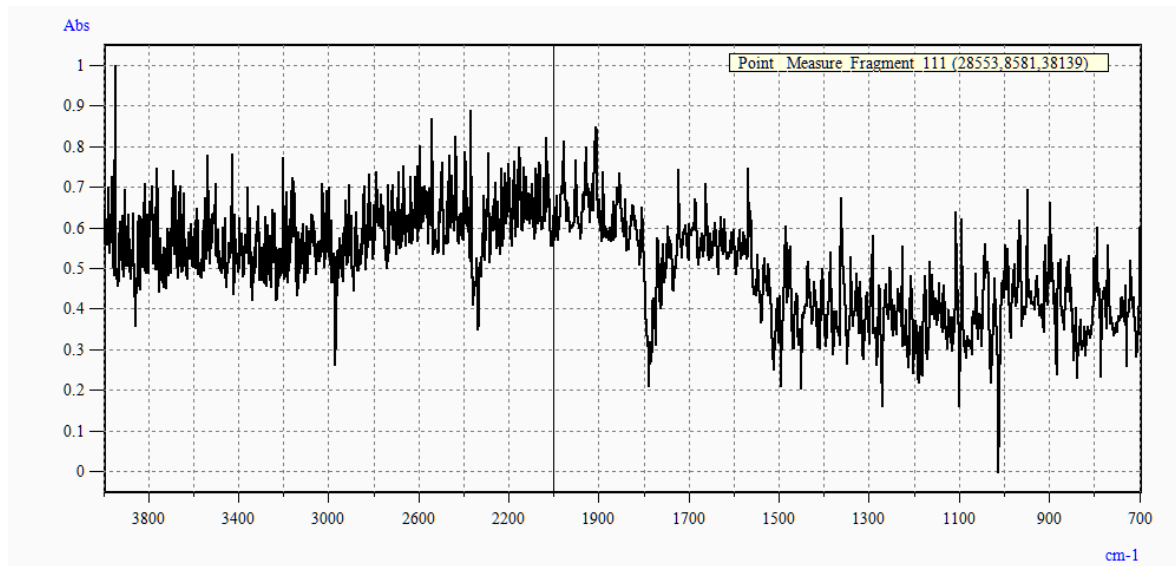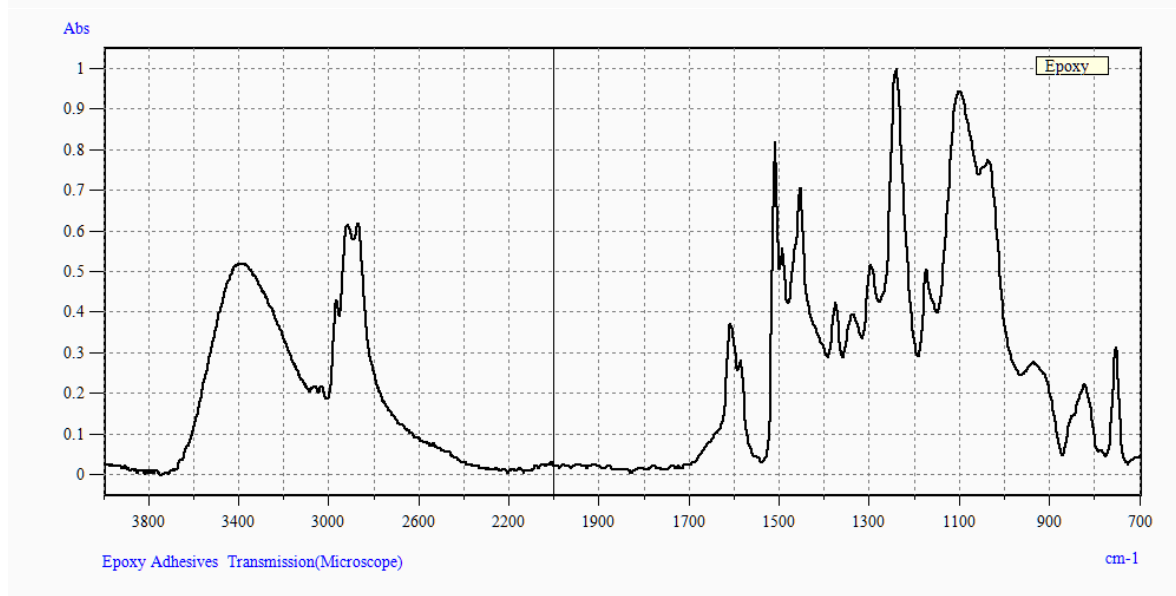

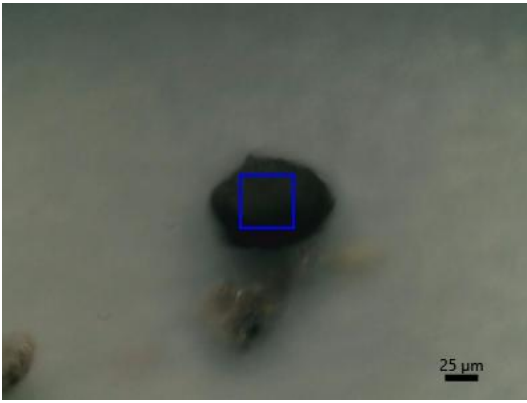

## Search Result Report

Filename : C:\Users\User\Desktop\UTSA samples\UV042821HA12\Point  
\_Measure\_Fragment\_112.apit

Acquired Datetime : 2022/11/12 23:52:59

### ● Search Parameters

Library list :

IRs

Polymer2

ATR-Polymer2

T-Polymer2

Maximum hits:

200

Minimum quality :

0

Algorithm : DiffDeriv

| Score | Library      | Name                 | Comment                                     |
|-------|--------------|----------------------|---------------------------------------------|
| 600   | ATR-Polymer2 | D_Polyethyleneglycol | Polyethylene Glycol 20000<br>DuraSamplIR-II |

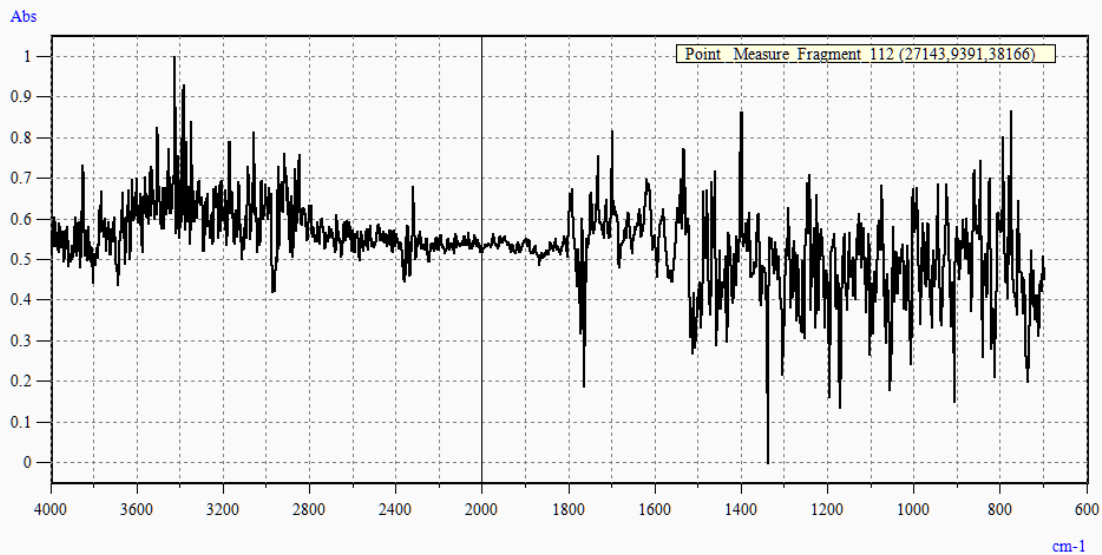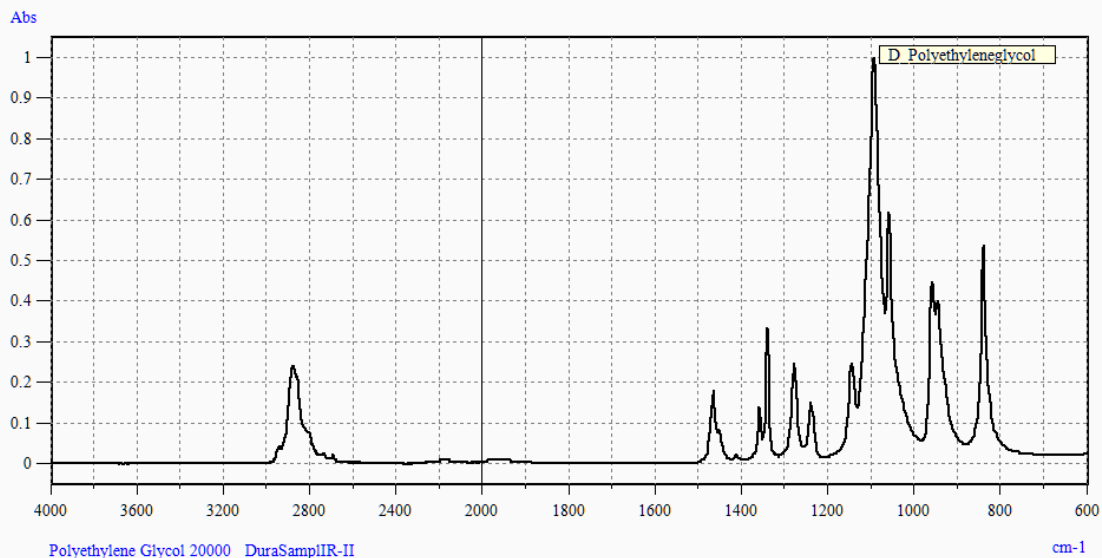

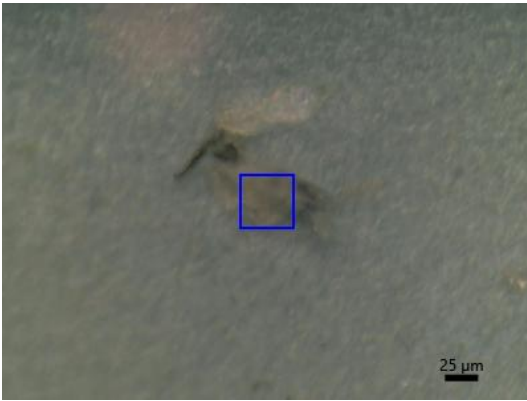

# Search Result Report

Filename : C:\Users\User\Desktop\UTSA samples\UV042821HA12\Point  
\_Measure\_Fragment\_113.apit

Acquired Datetime : 2022/11/12 23:54:53

● **Search Parameters**

Library list :  
IRs Polymer2  
ATR-Polymer2  
T-Polymer2  
Maximum hits: 200  
Minimum quality : 0  
Algorithm : DiffDeriv

| Score | Library    | Name | Comment                                                   |
|-------|------------|------|-----------------------------------------------------------|
| 583   | T-Polymer2 | PVDF | Polyvinylidene Fluoride(PVDF)<br>Transmission(Microscope) |

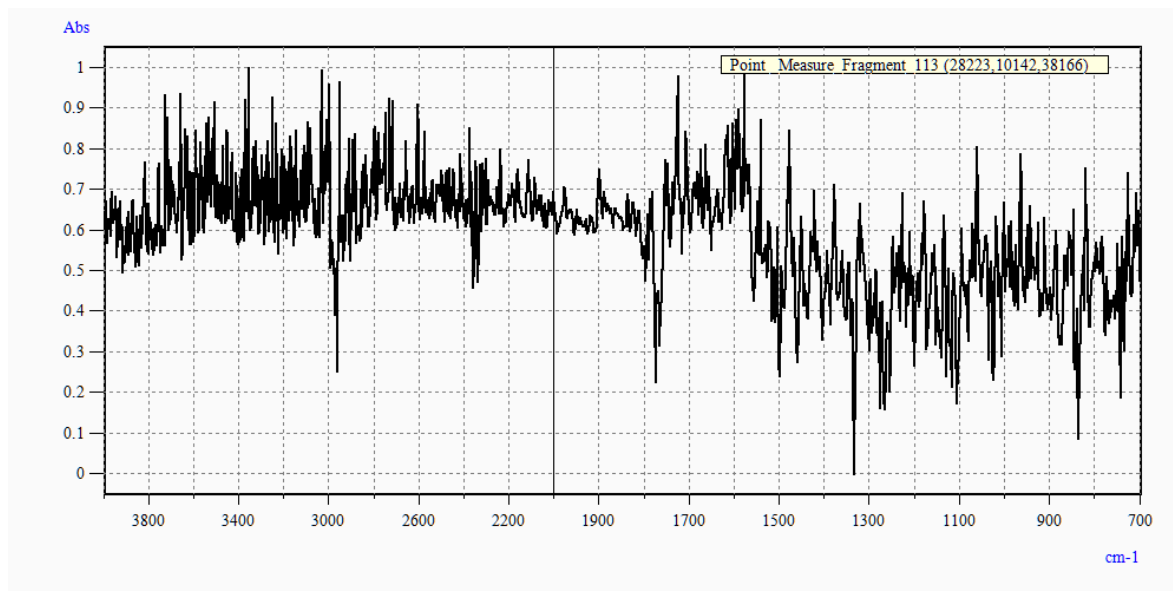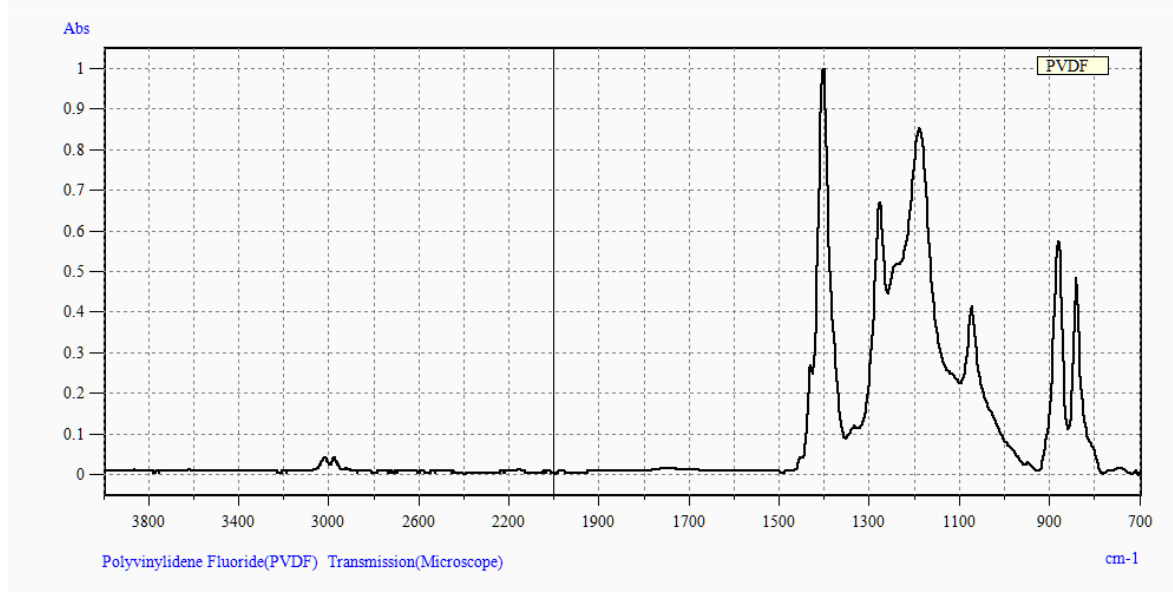

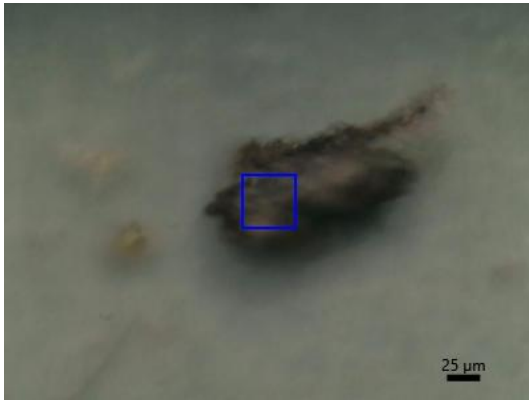

## Search Result Report

Filename : C:\Users\User\Desktop\UTSA samples\UV042821HA12\Point  
\_Measure\_Fragment\_114.apit

Acquired Datetime : 2022/11/12 23:59:17

### ● Search Parameters

Library list :

IRs

Polymer2

ATR-Polymer2

T-Polymer2

Maximum hits:

200

Minimum quality :

0

Algorithm : DiffDeriv

| Score | Library      | Name | Comment                          |
|-------|--------------|------|----------------------------------|
| 636   | ATR-Polymer2 | D_PC | Polycarbonate(PC) DuraSamplIR-II |

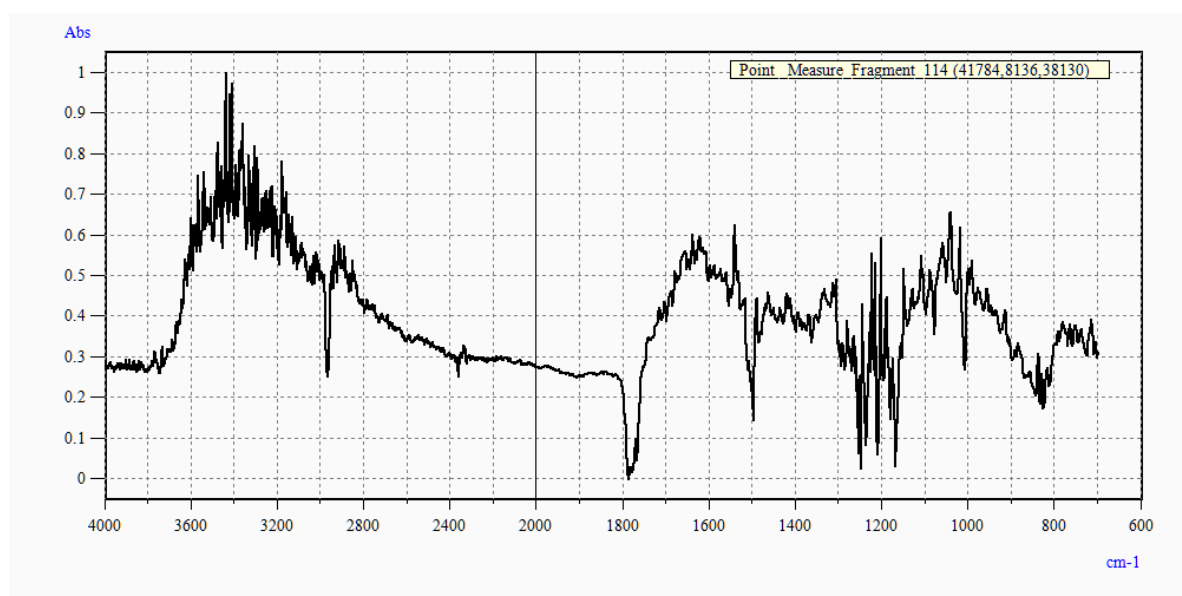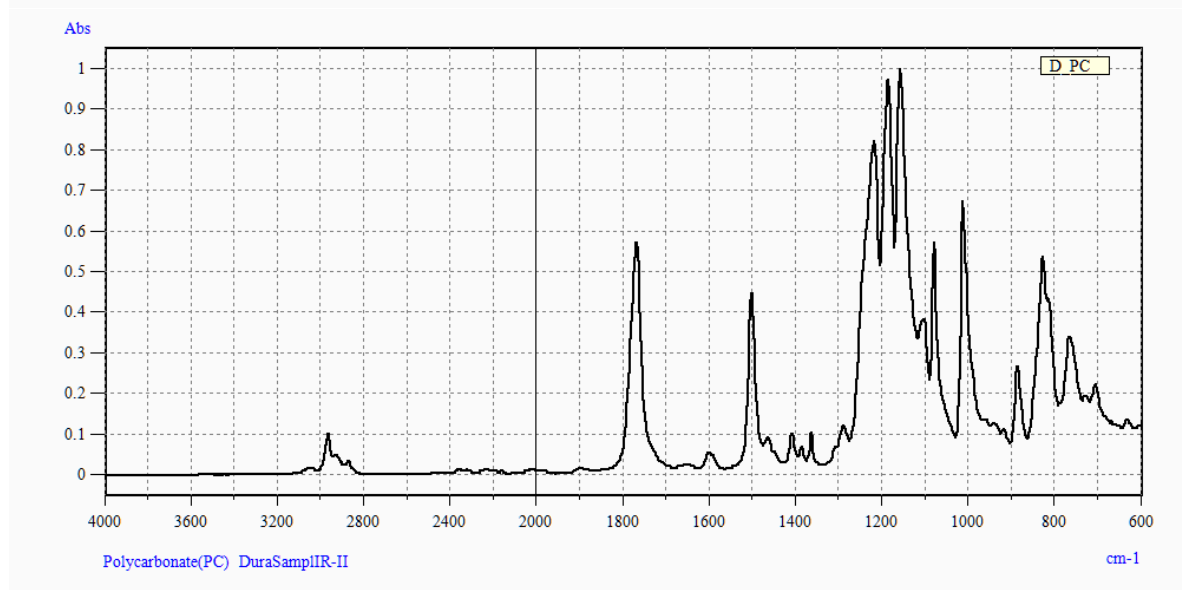

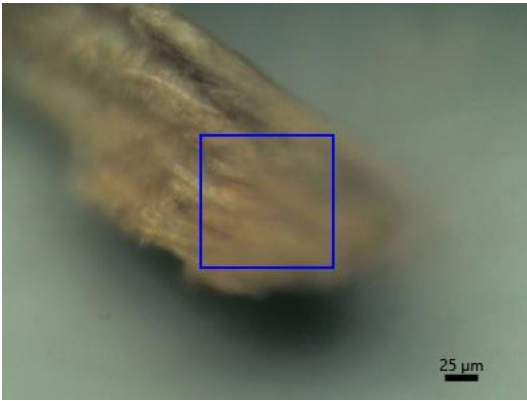

## Search Result Report

Filename : C:\Users\User\Desktop\UTSA samples\UV042821HA12\Point  
\_Measure\_Fragment\_115.apit

Acquired Datetime : 2022/11/13 00:02:33

### ● Search Parameters

Library list :

IRs

Polymer2

ATR-Polymer2

T-Polymer2

Maximum hits:

200

Minimum quality :

0

Algorithm : DiffDeriv

| Score | Library    | Name | Comment                                       |
|-------|------------|------|-----------------------------------------------|
| 669   | T-Polymer2 | PC   | Polycarbonate(PC)<br>Transmission(Microscope) |

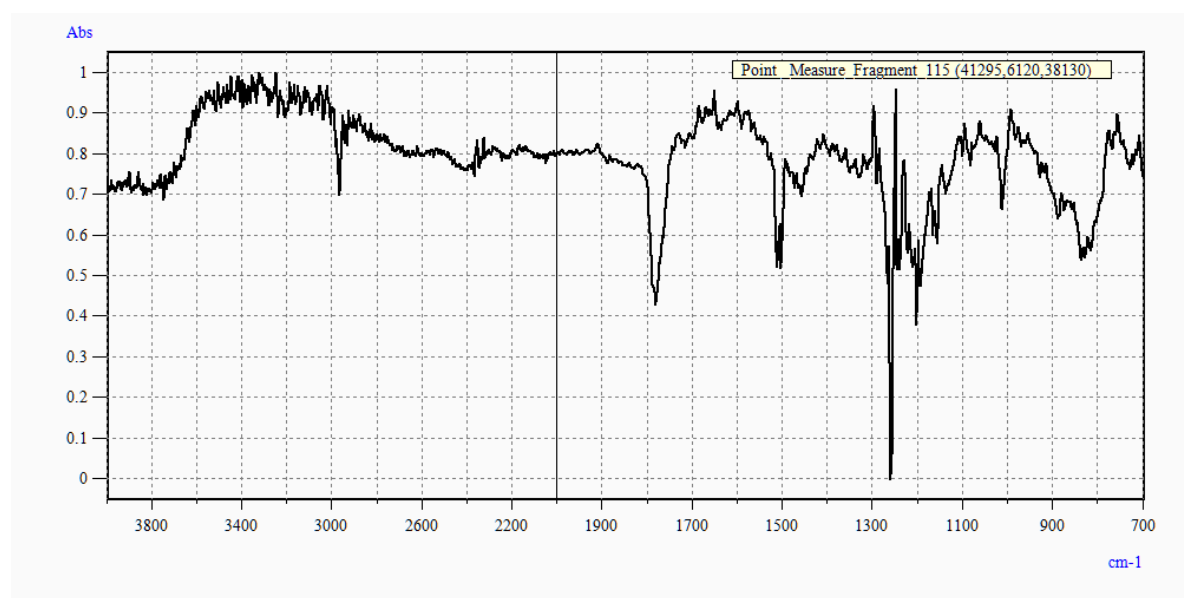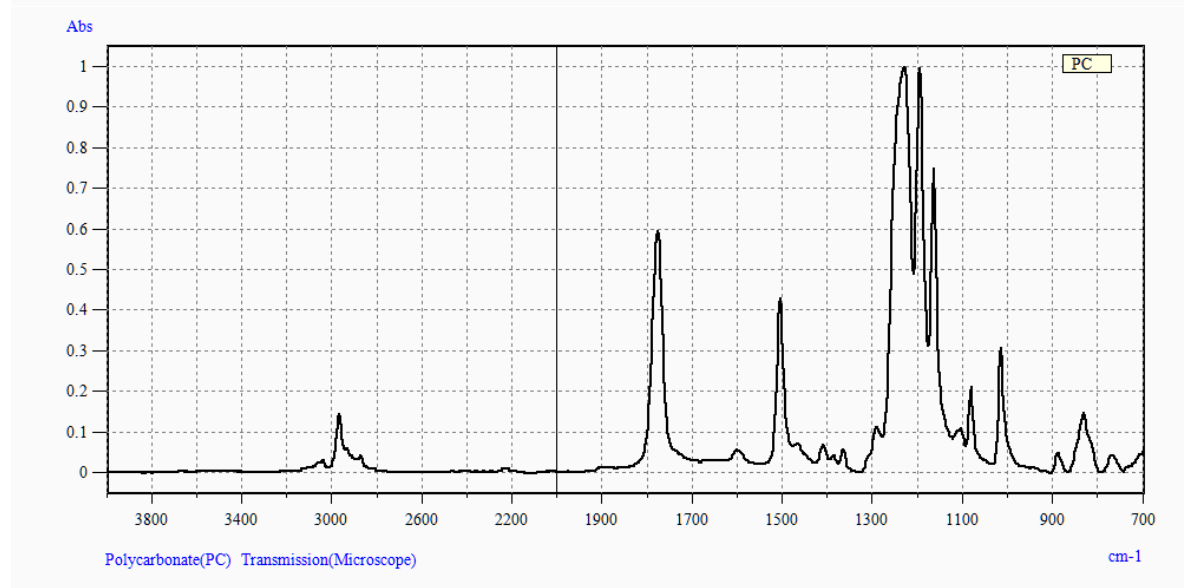

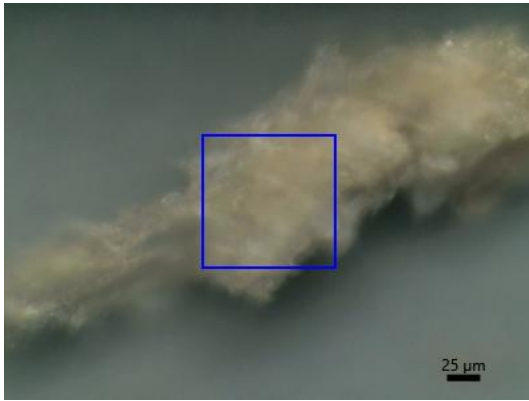

## Search Result Report

Filename : C:\Users\User\Desktop\UTSA samples\UV042821HA12\Point  
\_Measure\_Fragment\_116.apit

Acquired Datetime : 2022/11/13 00:06:44

### ● Search Parameters

Library list :

IRs

Polymer2

ATR-Polymer2

T-Polymer2

Maximum hits:

200

Minimum quality :

0

Algorithm : DiffDeriv

| Score | Library      | Name | Comment  |
|-------|--------------|------|----------|
| 599   | IRs Polymer2 | PPS  | PPS Film |

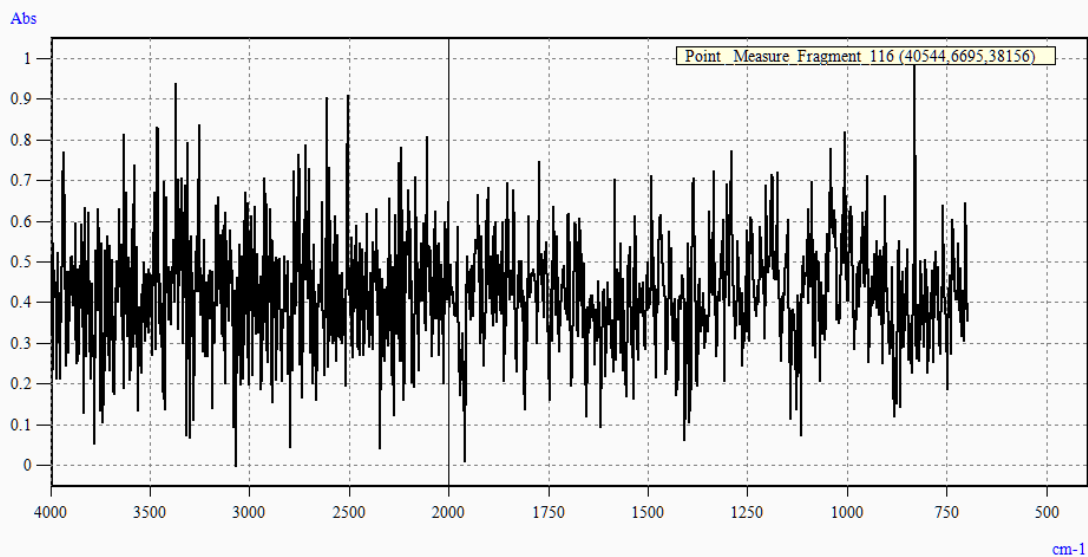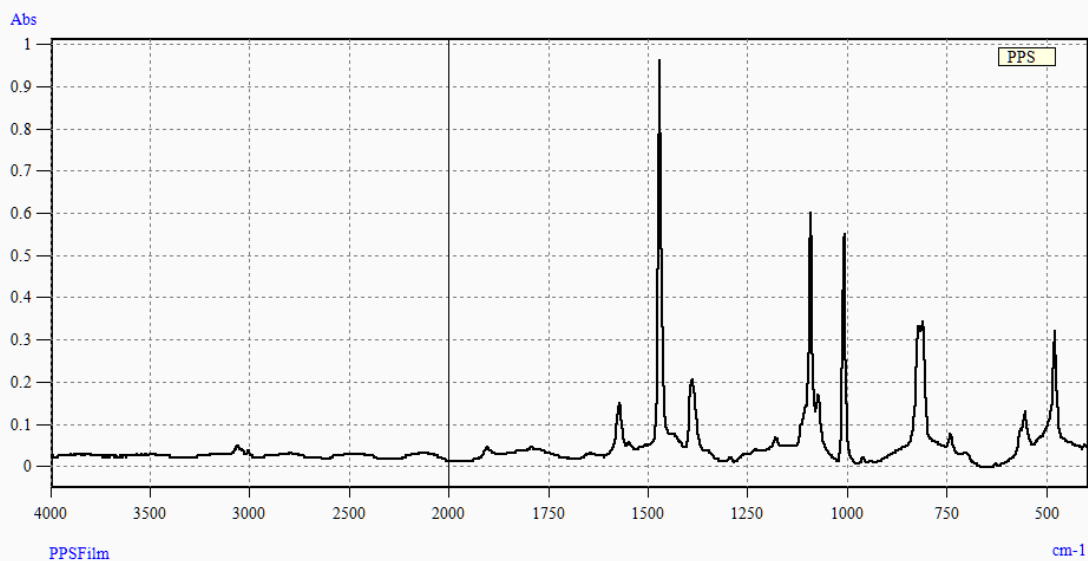

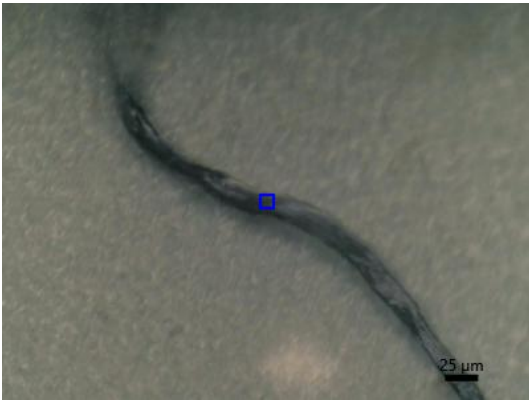

# Search Result Report

Filename : C:\Users\User\Desktop\UTSA samples\UV042821HA22\Point\_measurement\_Fragment\_111322\_51.apit

Acquired Datetime : 2022/11/13 13:45:03

● **Search Parameters**

Library list :  
 IRs Polymer2  
 ATR-Polymer2  
 T-Polymer2  
 Maximum hits: 200  
 Minimum quality : 0  
 Algorithm : DiffDeriv

| Score | Library    | Name  | Comment                                                  |
|-------|------------|-------|----------------------------------------------------------|
| 603   | T-Polymer2 | Epoxy | Epoxy Resin(Electronic Parts-1) Transmission(Microscope) |

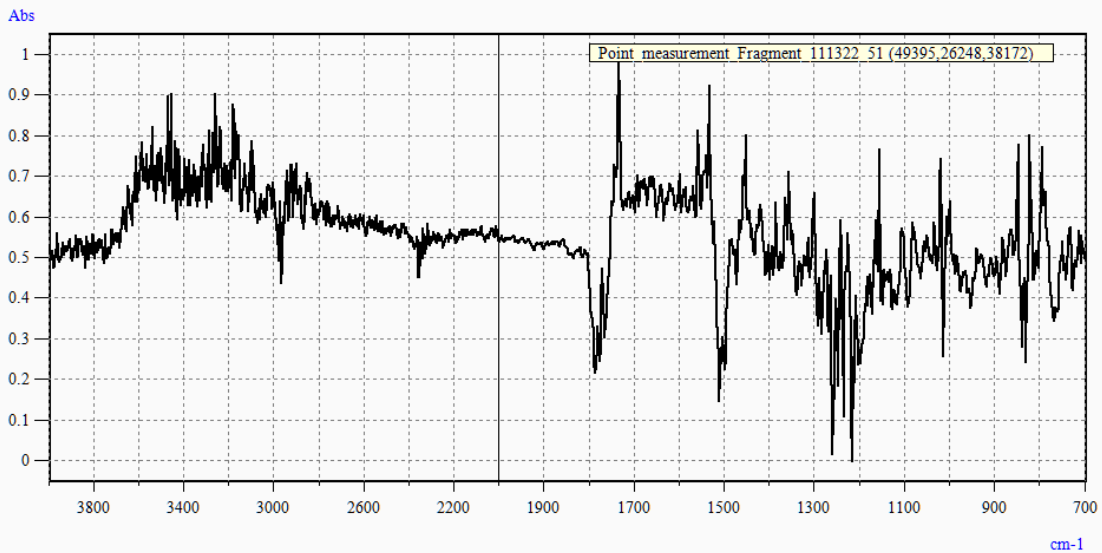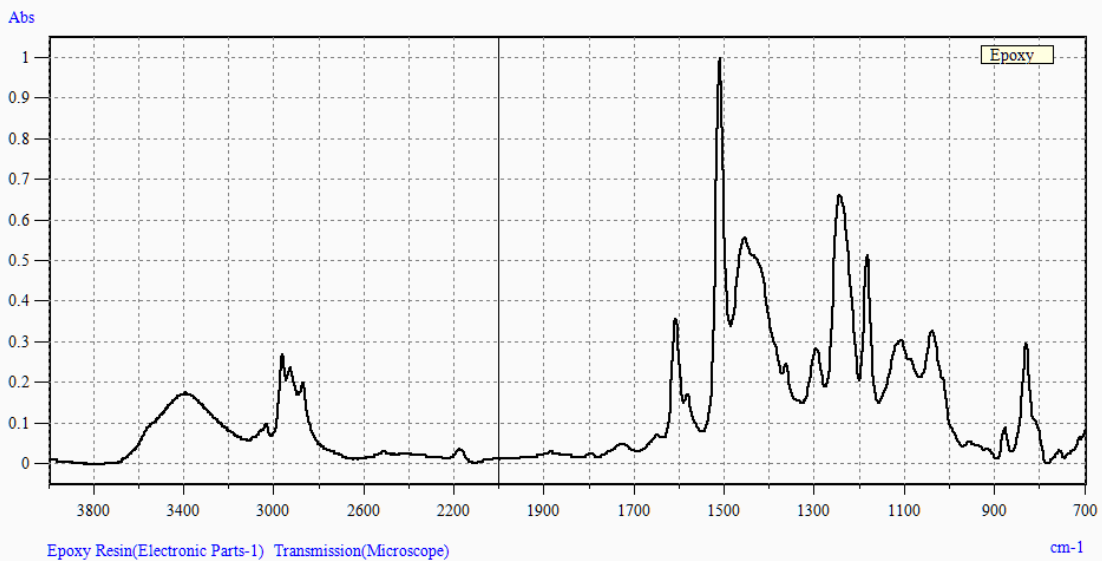

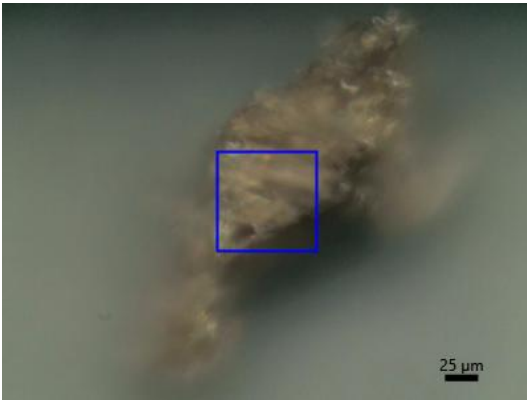

## Search Result Report

Filename : C:\Users\User\Desktop\UTSA  
 samples\UV042821HA22\Point\_measurement\_Fragment\_111322\_52.apit  
 Acquired Datetime : 2022/11/13 13:47:52

### ● Search Parameters

Library list :  
 IRs Polymer2  
 ATR-Polymer2  
 T-Polymer2  
 Maximum hits: 200  
 Minimum quality : 0  
 Algorithm : DiffDeriv

| Score | Library      | Name     | Comment                                                               |
|-------|--------------|----------|-----------------------------------------------------------------------|
| 614   | ATR-Polymer2 | D_PC-PBT | Polycarbonate/Polybutylene<br>Terephthalate(PC/PBT)<br>DuraSamplIR-II |

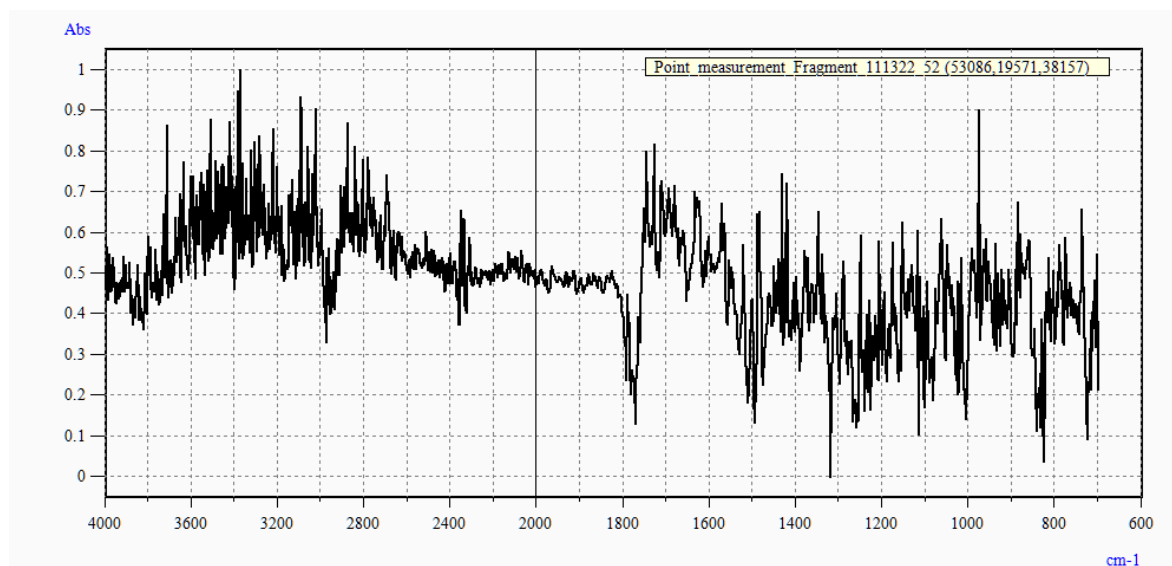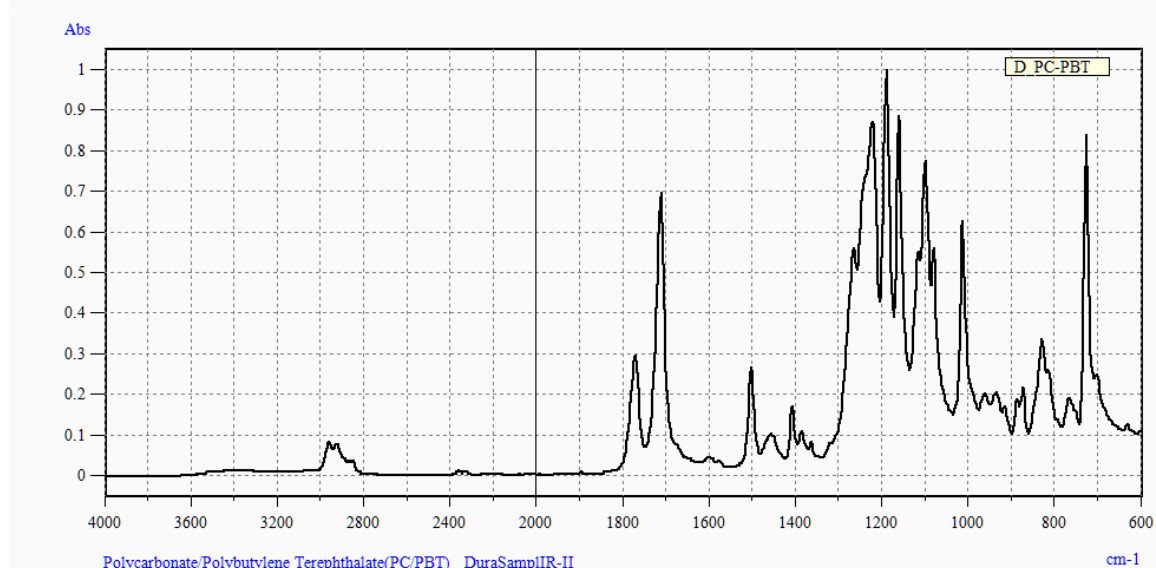

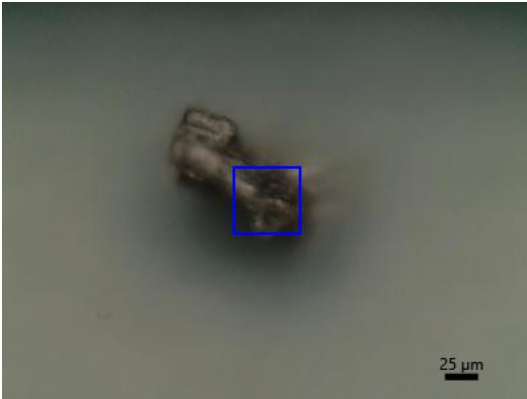

## Search Result Report

Filename : C:\Users\User\Desktop\UTSA  
 samples\UV042821HA22\Point\_measurement\_Fragment\_111322\_53.apit

Acquired Datetime : 2022/11/13 13:51:28

### ● Search Parameters

Library list :

IRs

Polymer2

ATR-Polymer2

T-Polymer2

Maximum hits:

200

Minimum quality :

0

Algorithm : DiffDeriv

| Score | Library      | Name | Comment                          |
|-------|--------------|------|----------------------------------|
| 690   | ATR-Polymer2 | D_PC | Polycarbonate(PC) DuraSamplIR-II |

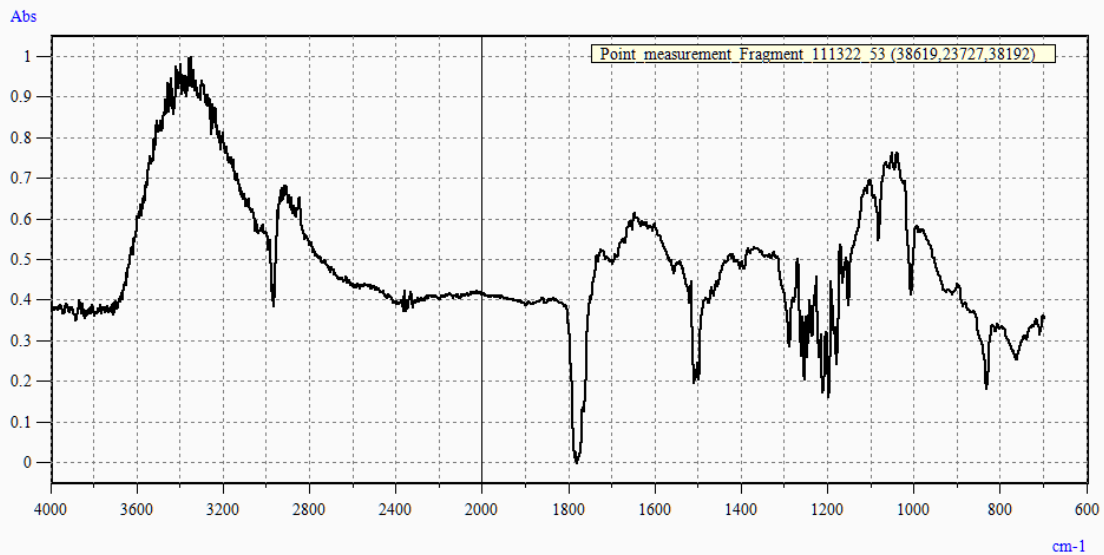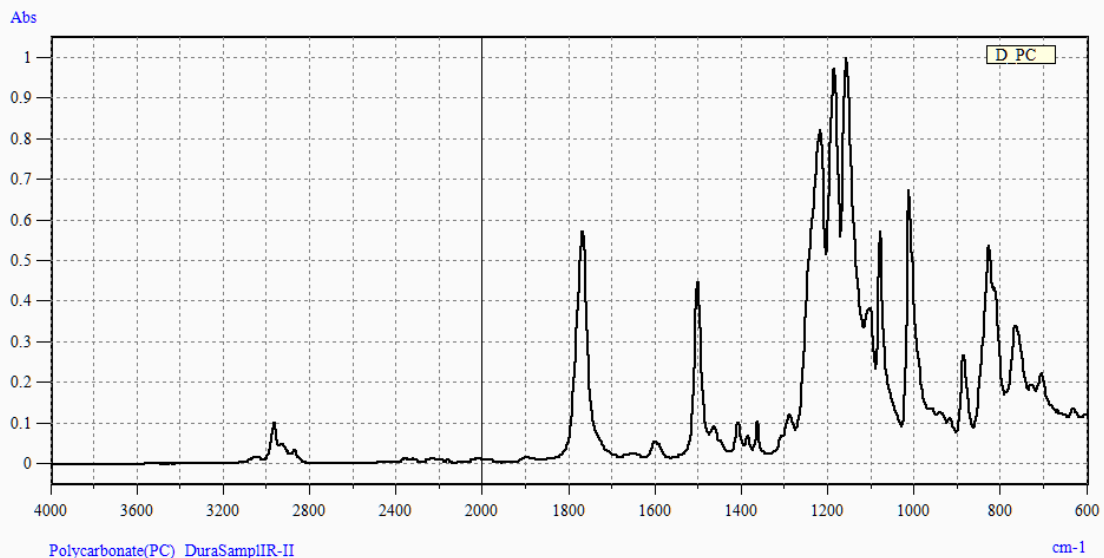

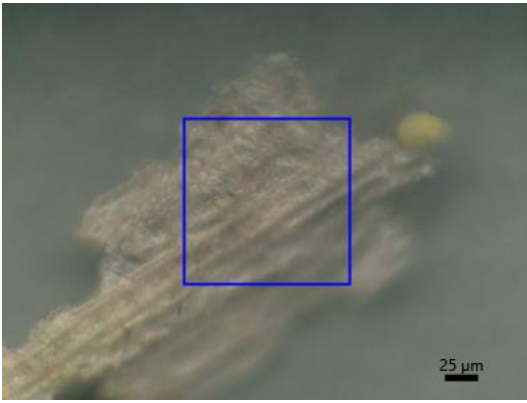

# Search Result Report

Filename : C:\Users\User\Desktop\UTSA  
 samples\UV042821HA22\Point\_measurement\_Fragment\_111322\_54.apit  
 Acquired Datetime : 2022/11/13 13:53:27

● **Search Parameters**

Library list :  
 IRs Polymer2  
 ATR-Polymer2  
 T-Polymer2  
 Maximum hits: 200  
 Minimum quality : 0  
 Algorithm : DiffDeriv

| Score | Library    | Name   | Comment                                                     |
|-------|------------|--------|-------------------------------------------------------------|
| 599   | T-Polymer2 | T_HDPE | High Density Polyethylene(HDPE)<br>Transmission(Microscope) |

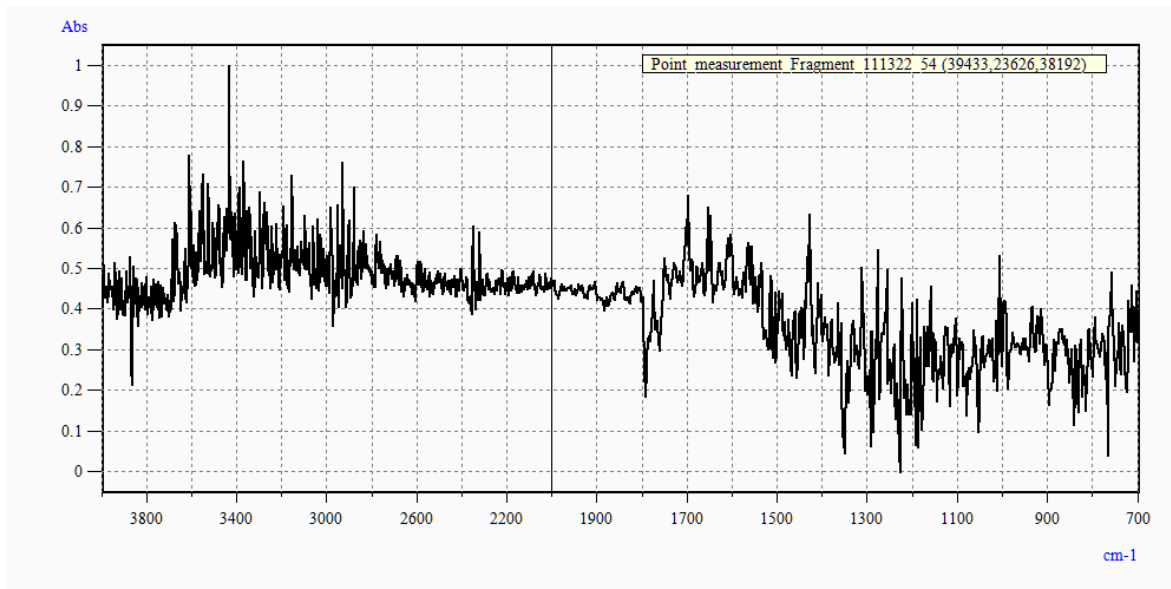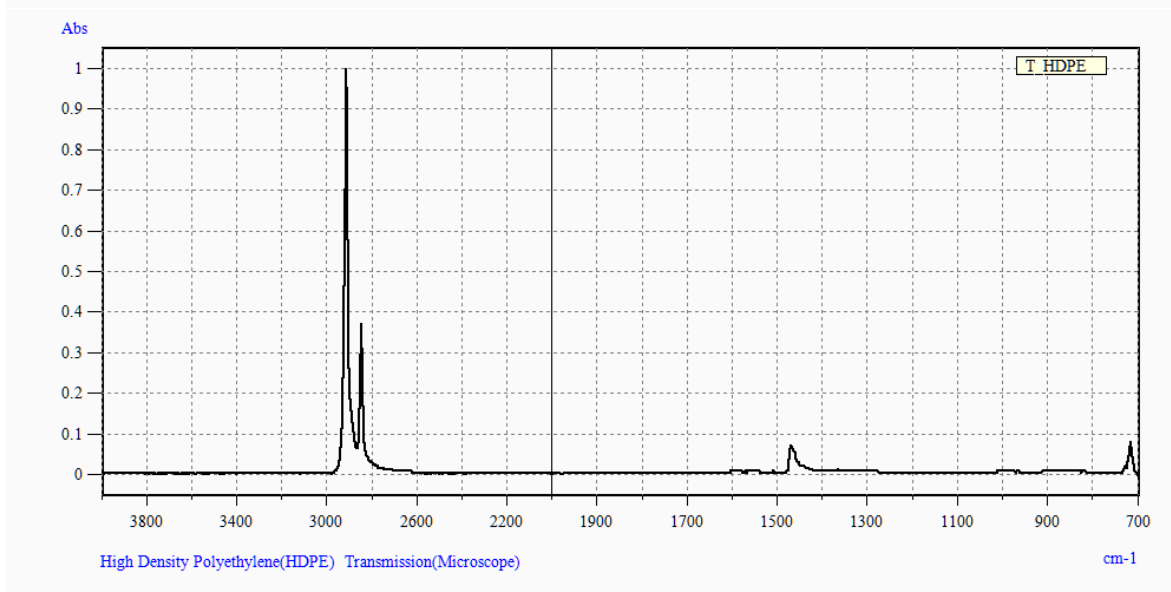

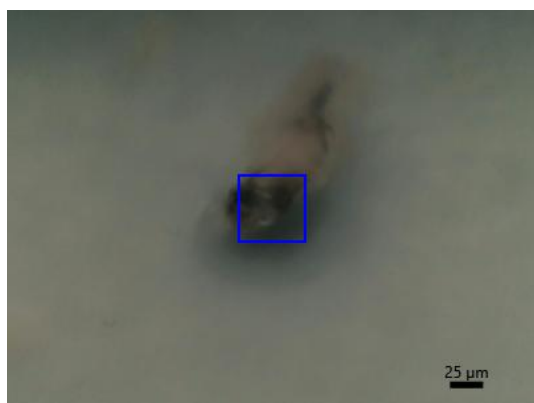

## Search Result Report

Filename : C:\Users\User\Desktop\UTSA  
samples\UV042821HA22\Point\_measurement\_Fragment\_111322\_55.apit

Acquired Datetime : 2022/11/13 13:56:25

### ● Search Parameters

Library list :

IRs

Polymer2

ATR-Polymer2

T-Polymer2

Maximum hits:

200

Minimum quality :

0

Algorithm : DiffDeriv

| Score | Library      | Name | Comment |
|-------|--------------|------|---------|
| 606   | IRs Polymer2 | PPS  | PPSFilm |

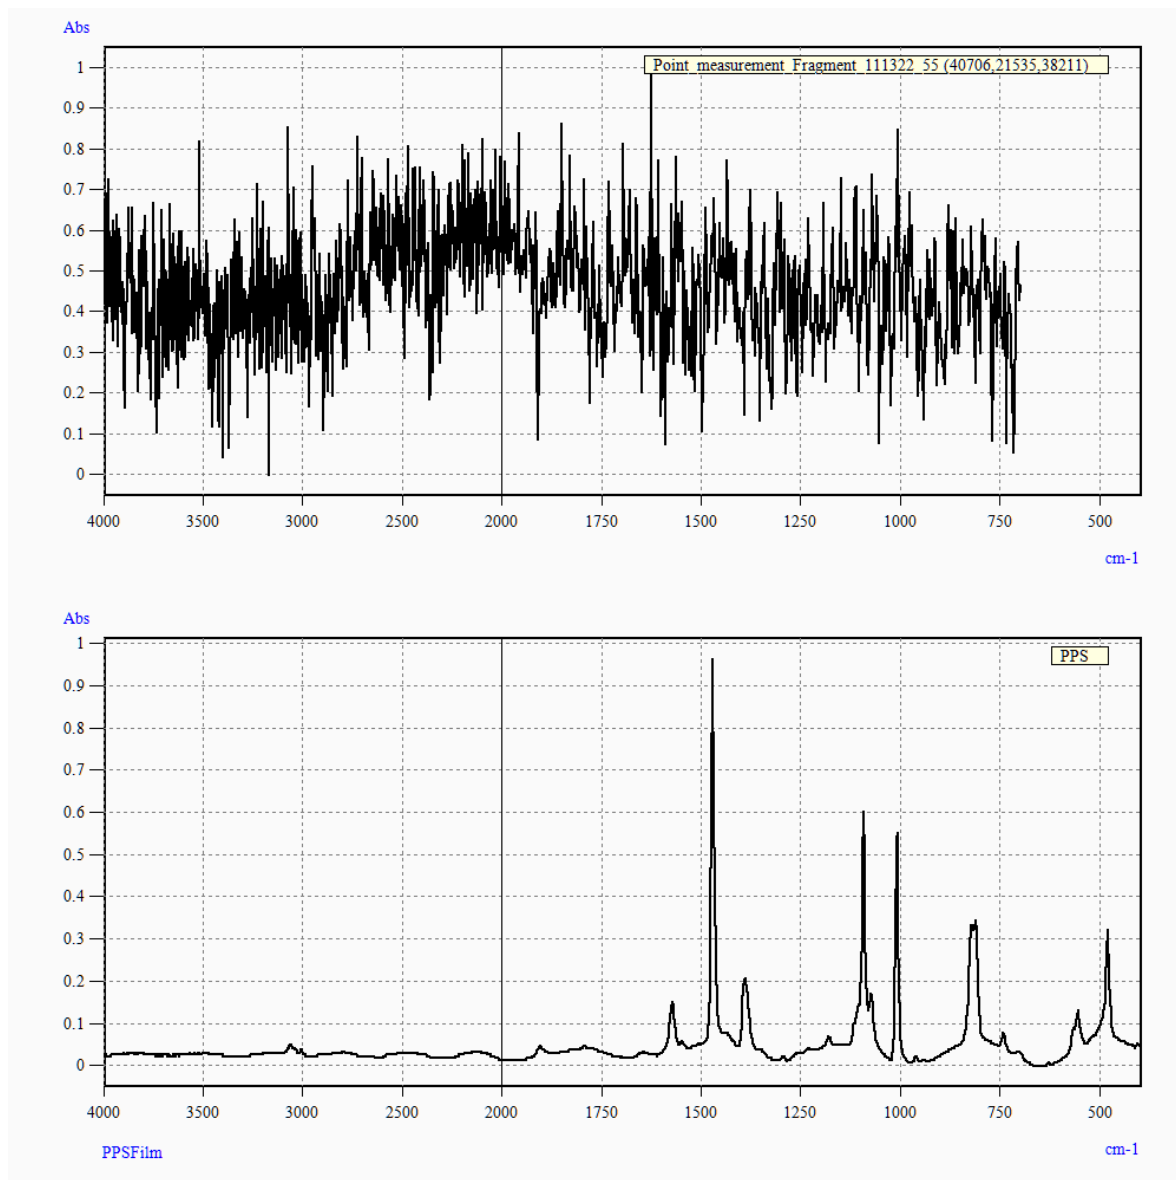

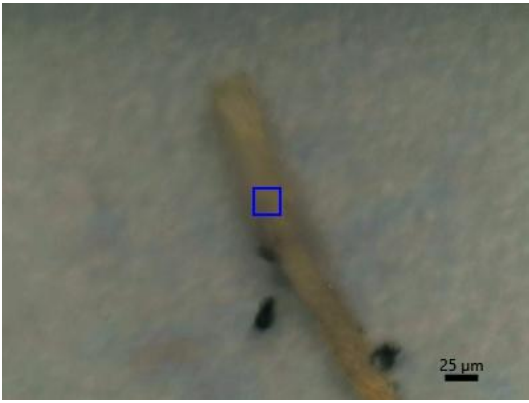

## Search Result Report

Filename : C:\Users\User\Desktop\UTSA  
samples\UV042821HA22\Point\_measurement\_Fragment\_111322\_56.apit

Acquired Datetime : 2022/11/13 13:58:51

● **Search Parameters**

Library list :

IRs

Polymer2

ATR-Polymer2

T-Polymer2

Maximum hits:

200

Minimum quality :

0

Algorithm : DiffDeriv

| Score | Library      | Name                | Comment                                |
|-------|--------------|---------------------|----------------------------------------|
| 589   | ATR-Polymer2 | D_PolyethyleneOxide | Poly(Ethylene Oxide)<br>DuraSamplIR-II |

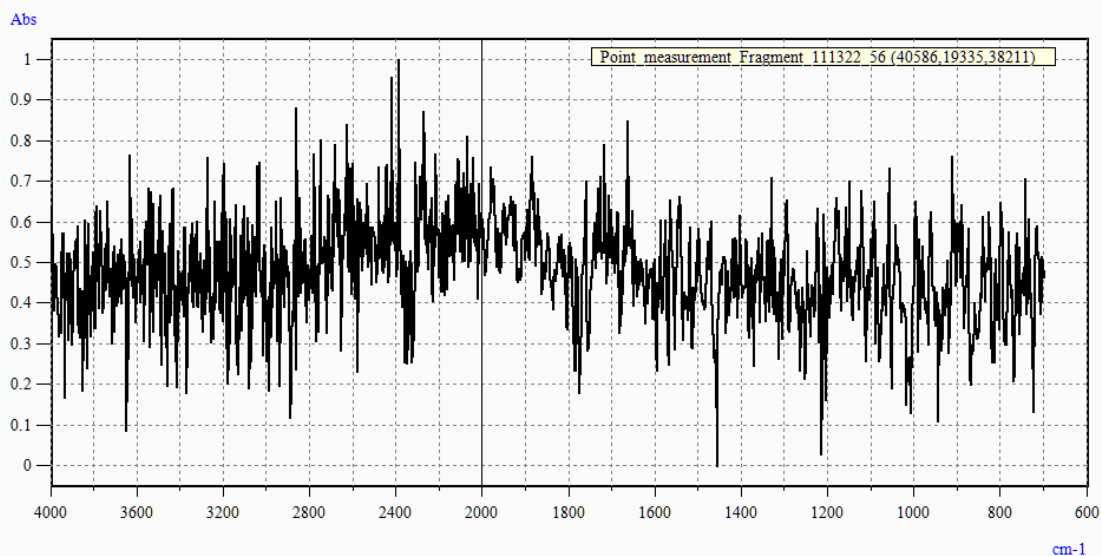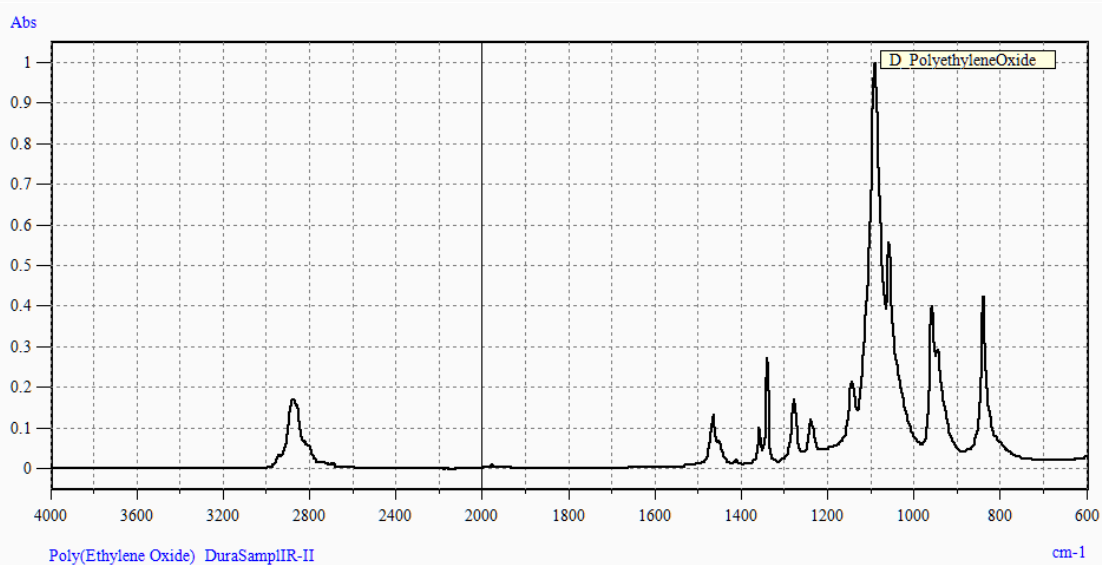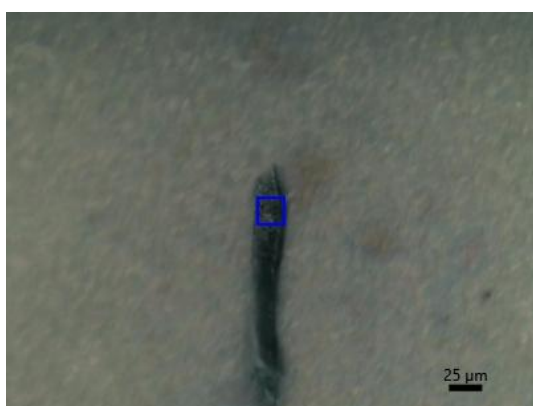

## Search Result Report

Filename : C:\Users\User\Desktop\UTSA  
 samples\UV042821HA22\Point\_measurement\_Fragment\_111322\_57.apit  
 Acquired Datetime : 2022/11/13 14:05:01

### ● Search Parameters

Library list :  
 IRs Polymer2  
 ATR-Polymer2  
 T-Polymer2  
 Maximum hits: 200  
 Minimum quality : 0  
 Algorithm : DiffDeriv

| Score | Library      | Name     | Comment      |
|-------|--------------|----------|--------------|
| 692   | IRs Polymer2 | LANOLINE | LanolineFilm |

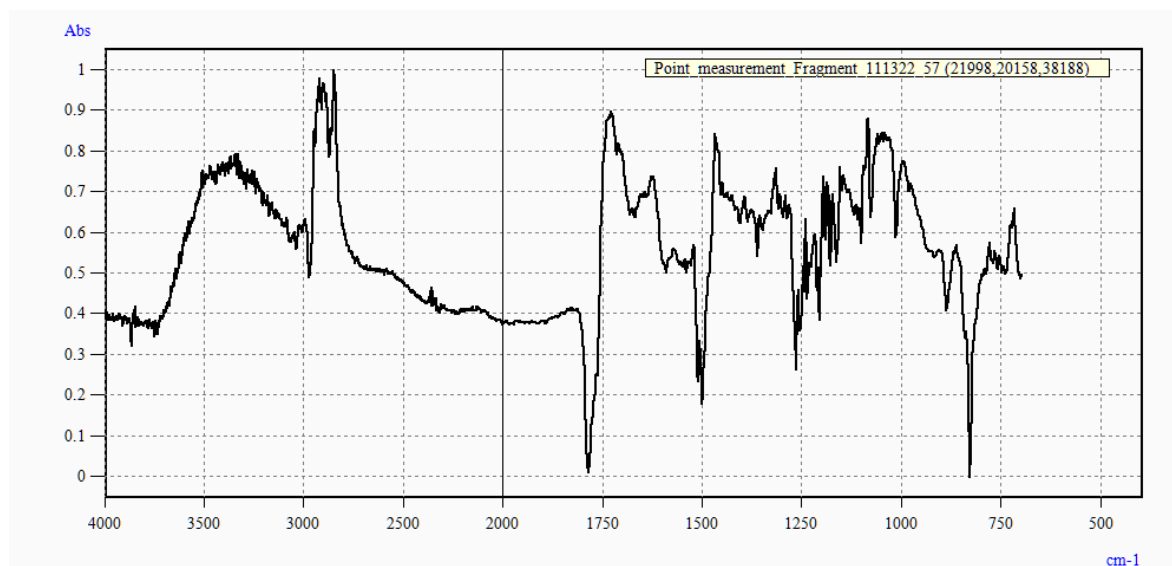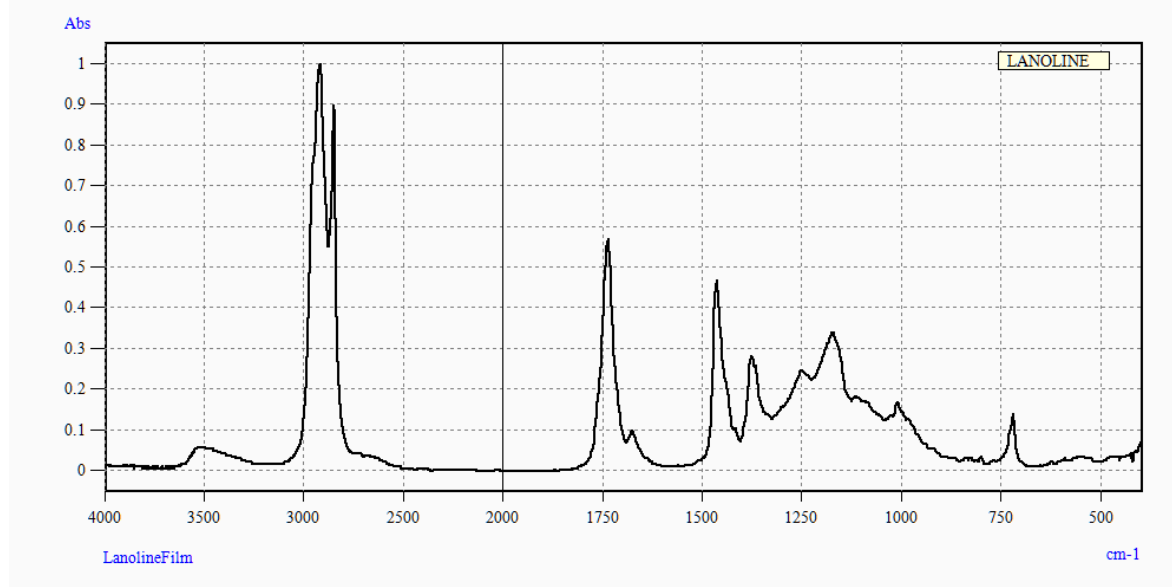

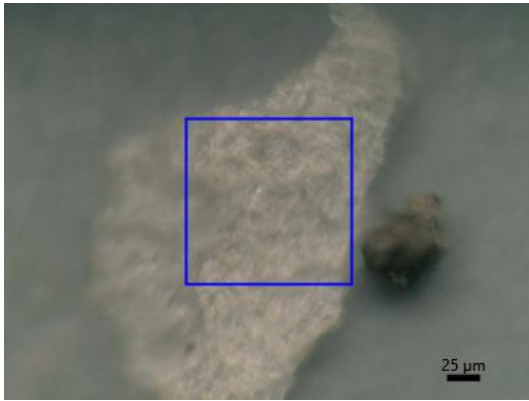

## Search Result Report

Filename : C:\Users\User\Desktop\UTSA  
 samples\UV042821HA22\Point\_measurement\_Fragment\_111322\_58.apit  
 Acquired Datetime : 2022/11/13 14:07:17

### ● Search Parameters

Library list :  
 IRs Polymer2  
 ATR-Polymer2  
 T-Polymer2  
 Maximum hits: 200  
 Minimum quality : 0  
 Algorithm : DiffDeriv

| Score | Library    | Name | Comment                                       |
|-------|------------|------|-----------------------------------------------|
| 624   | T-Polymer2 | PC   | Polycarbonate(PC)<br>Transmission(Microscope) |

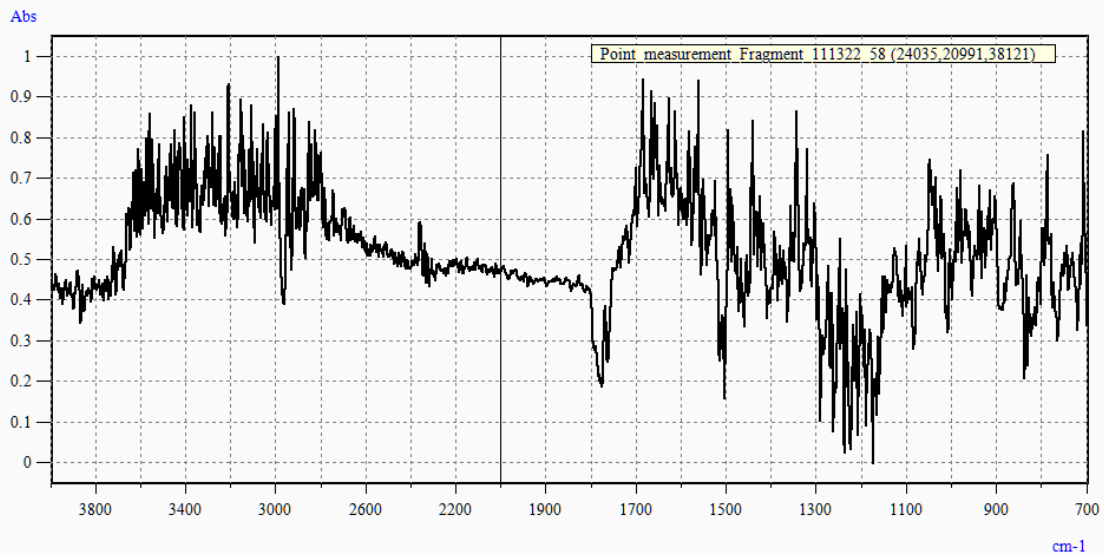

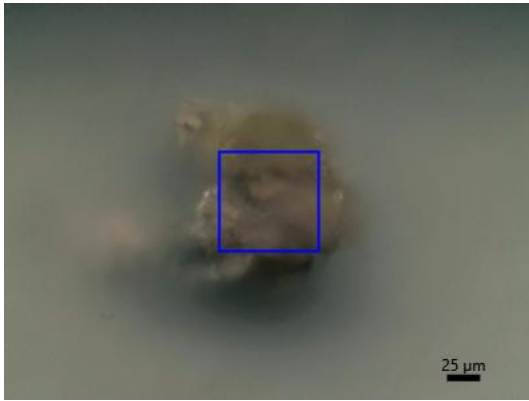

## Search Result Report

Filename : C:\Users\User\Desktop\UTSA  
 samples\UV042821HA22\Point\_measurement\_Fragment\_111322\_59.apit  
 Acquired Datetime : 2022/11/13 14:10:31

### ● Search Parameters

Library list : Polymer2  
 IRs  
 ATR-Polymer2  
 T-Polymer2  
 Maximum hits: 200  
 Minimum quality : 0  
 Algorithm : DiffDeriv

| Score | Library      | Name | Comment                          |
|-------|--------------|------|----------------------------------|
| 619   | ATR-Polymer2 | D_PC | Polycarbonate(PC) DuraSamplIR-II |

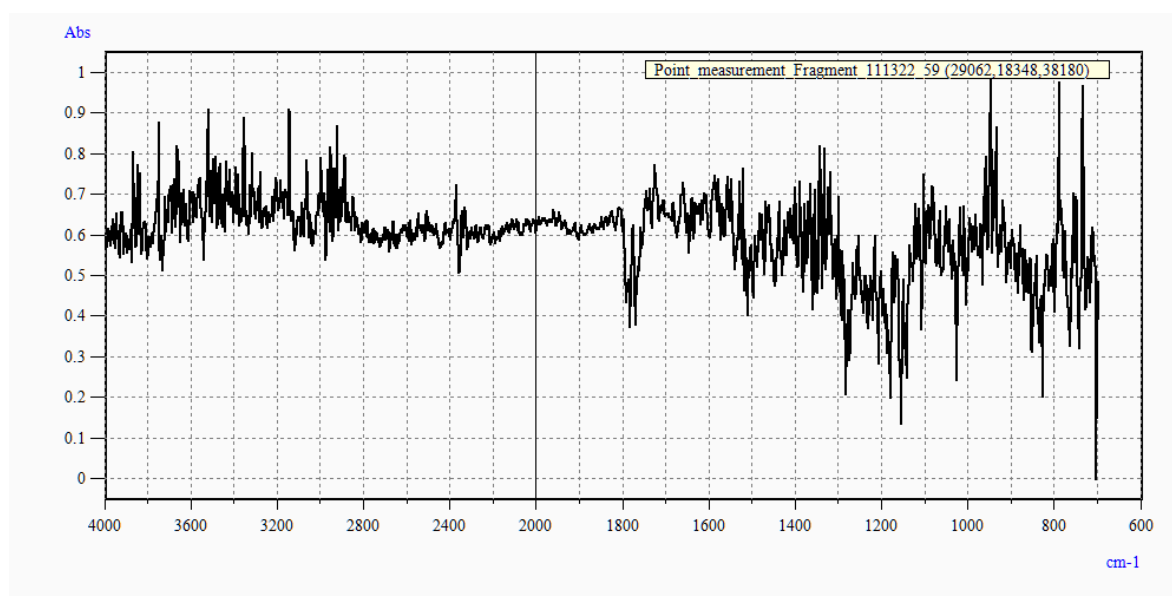

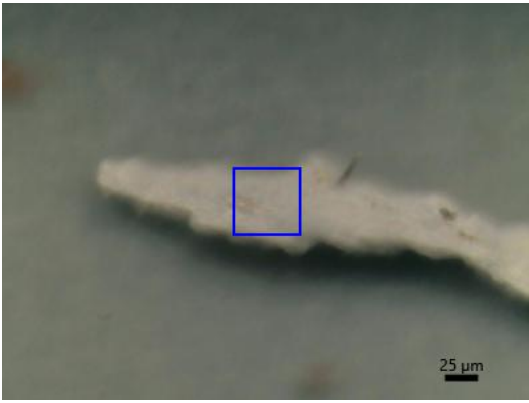

## Search Result Report

Filename : C:\Users\User\Desktop\UTSA  
 samples\UV042821HA22\Point\_measurement\_Fragment\_111322\_60.apit  
 Acquired Datetime : 2022/11/13 14:15:07

### ● Search Parameters

Library list : Polymer2  
 IRs  
 ATR-Polymer2  
 T-Polymer2  
 Maximum hits: 200  
 Minimum quality : 0  
 Algorithm : DiffDeriv

| Score | Library    | Name         | Comment                                                    |
|-------|------------|--------------|------------------------------------------------------------|
| 606   | T-Polymer2 | Irganox 1076 | Polymer Additive(Irganox 1076)<br>Transmission(Microscope) |

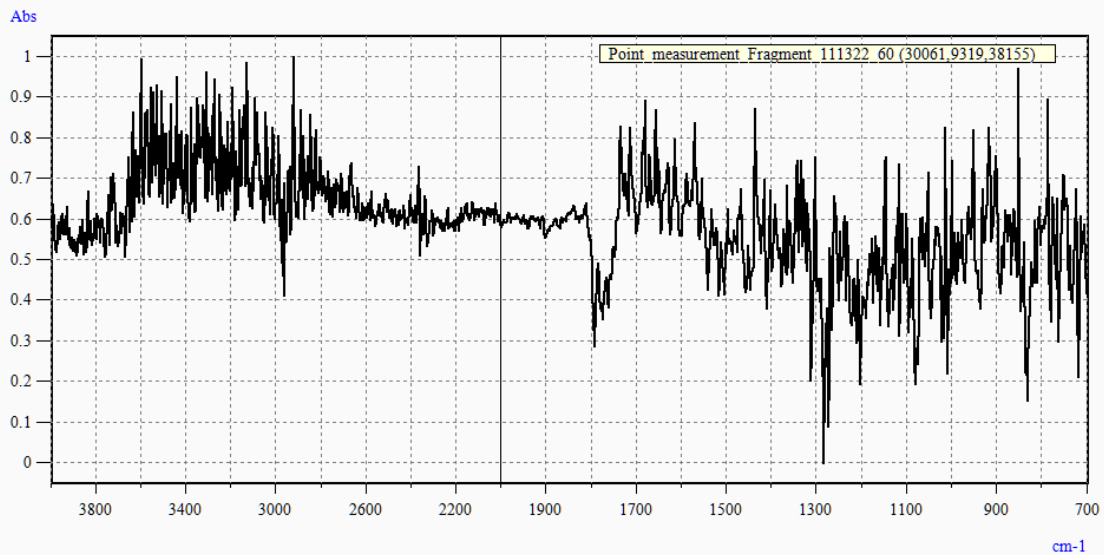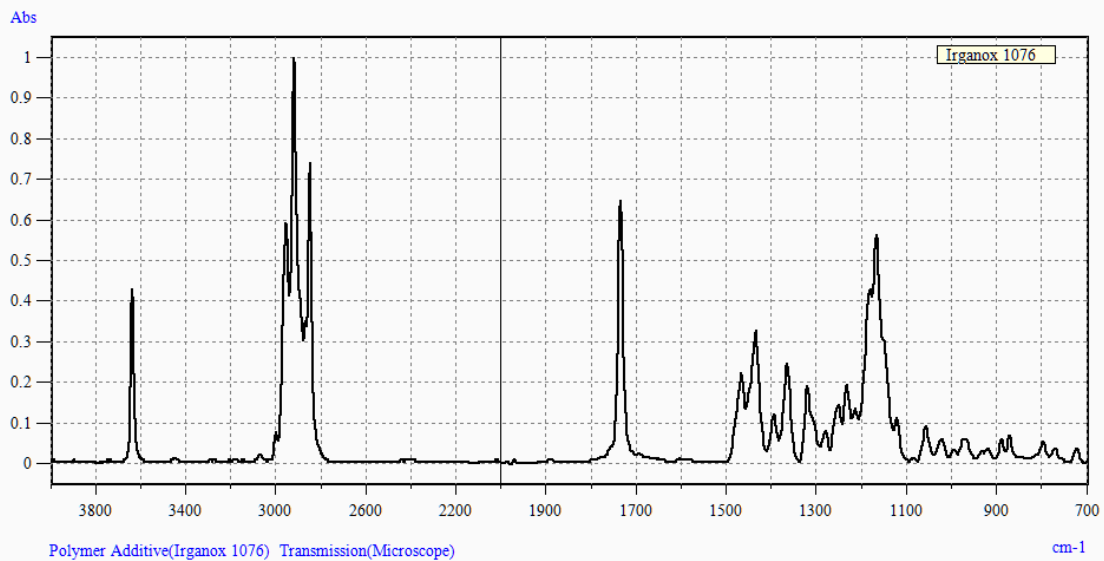

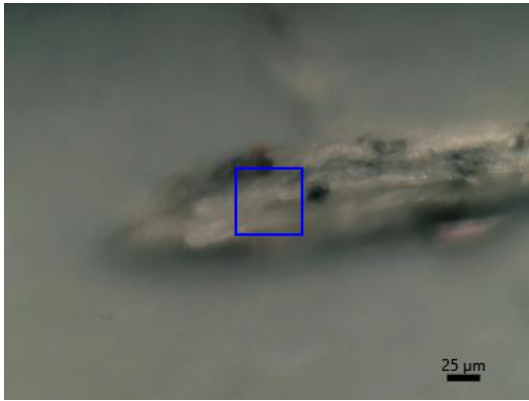

## Search Result Report

Filename : C:\Users\User\Desktop\UTSA  
 samples\UV042821HA22\Point\_measurement\_Fragment\_111322\_61.apit  
 Acquired Datetime : 2022/11/13 14:18:09

### ● Search Parameters

Library list :  
 IRs Polymer2  
 ATR-Polymer2  
 T-Polymer2  
 Maximum hits: 200  
 Minimum quality : 0  
 Algorithm : DiffDeriv

| Score | Library      | Name    | Comment                                                                    |
|-------|--------------|---------|----------------------------------------------------------------------------|
| 603   | ATR-Polymer2 | D_Ht-BR | High-trans Butadiene<br>Rubber(High-trans Polubutadiene)<br>DuraSamplIR-II |

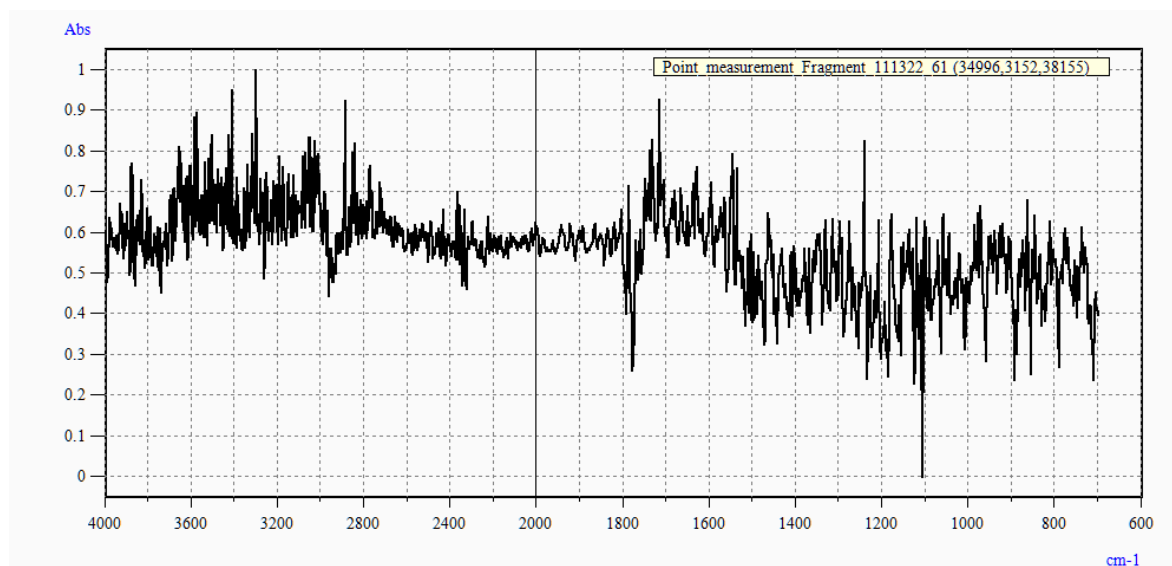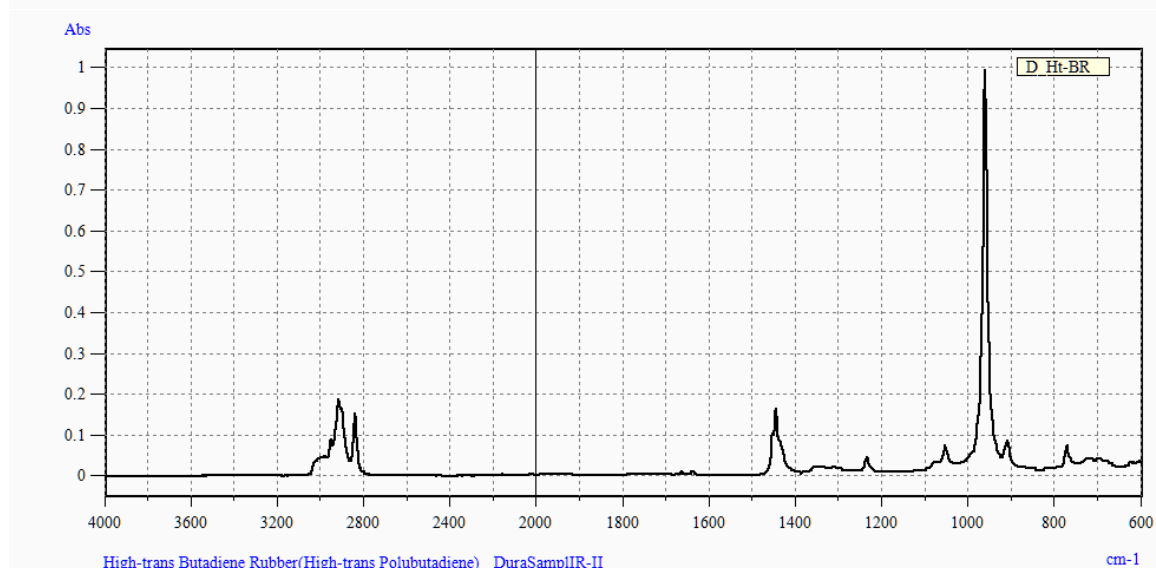

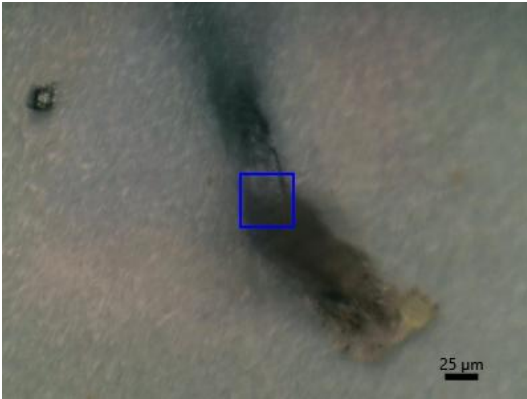

## Search Result Report

Filename : C:\Users\User\Desktop\UTSA  
 samples\UV042821HA22\Point\_measurement\_Fragment\_111322\_62.apit  
 Acquired Datetime : 2022/11/13 14:21:16

### ● Search Parameters

Library list :  
 IRs Polymer2  
 ATR-Polymer2  
 T-Polymer2  
 Maximum hits: 200  
 Minimum quality : 0  
 Algorithm : DiffDeriv

| Score | Library      | Name | Comment                                                                          |
|-------|--------------|------|----------------------------------------------------------------------------------|
| 589   | ATR-Polymer2 | D_SB | Styrene/Butadiene(SB) SBS Block Copolymer(Styrene content 30%)<br>DuraSamplIR-II |

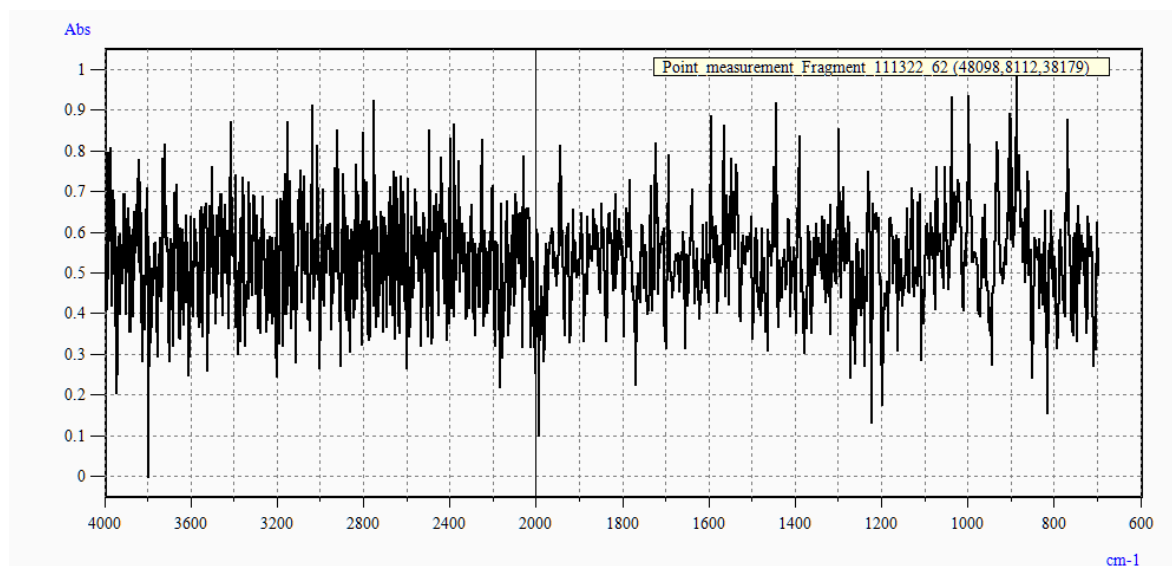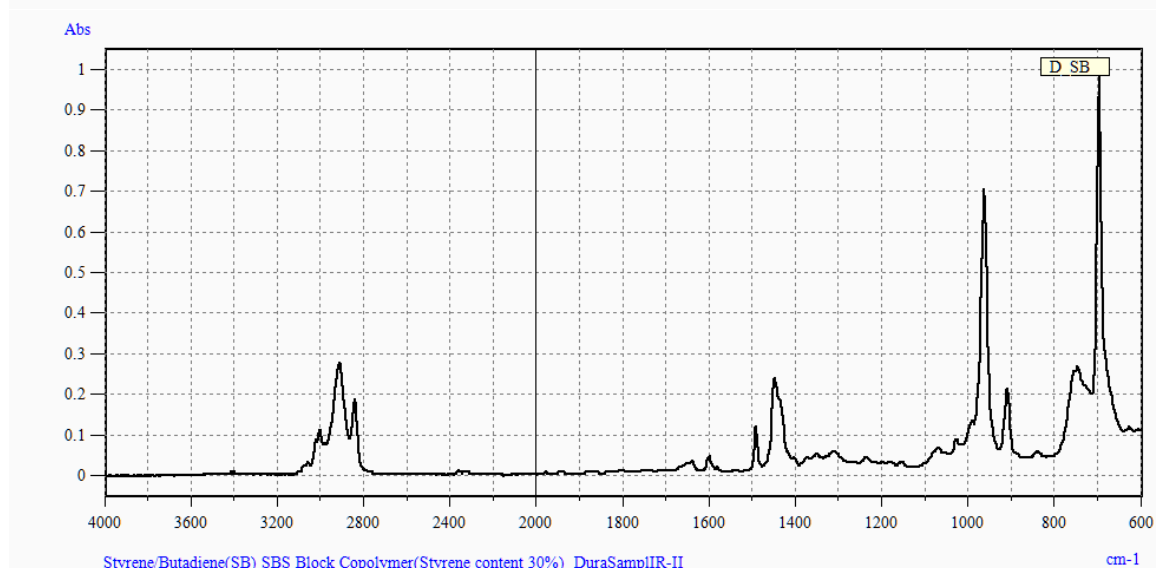

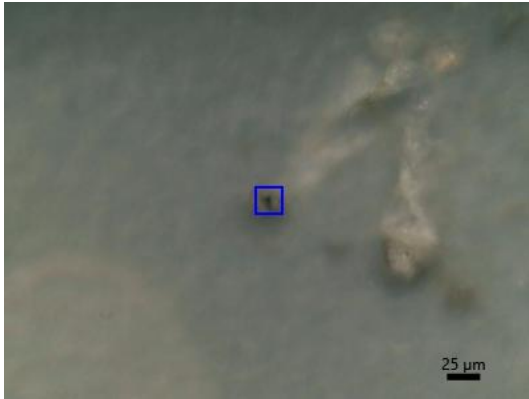

# Search Result Report

Filename : C:\Users\User\Desktop\UTSA samples\UV042821HA22\Point\_measurement\_Fragment\_111322\_63.apit

Acquired Datetime : 2022/11/13 14:24:42

● **Search Parameters**

Library list : IRs Polymer2  
 ATR-Polymer2  
 T-Polymer2  
 Maximum hits: 200  
 Minimum quality : 0  
 Algorithm : DiffDeriv

| Score | Library      | Name  | Comment                                       |
|-------|--------------|-------|-----------------------------------------------|
| 570   | ATR-Polymer2 | D_PI3 | Polyimide(Electronic Parts)<br>DuraSamplIR-II |

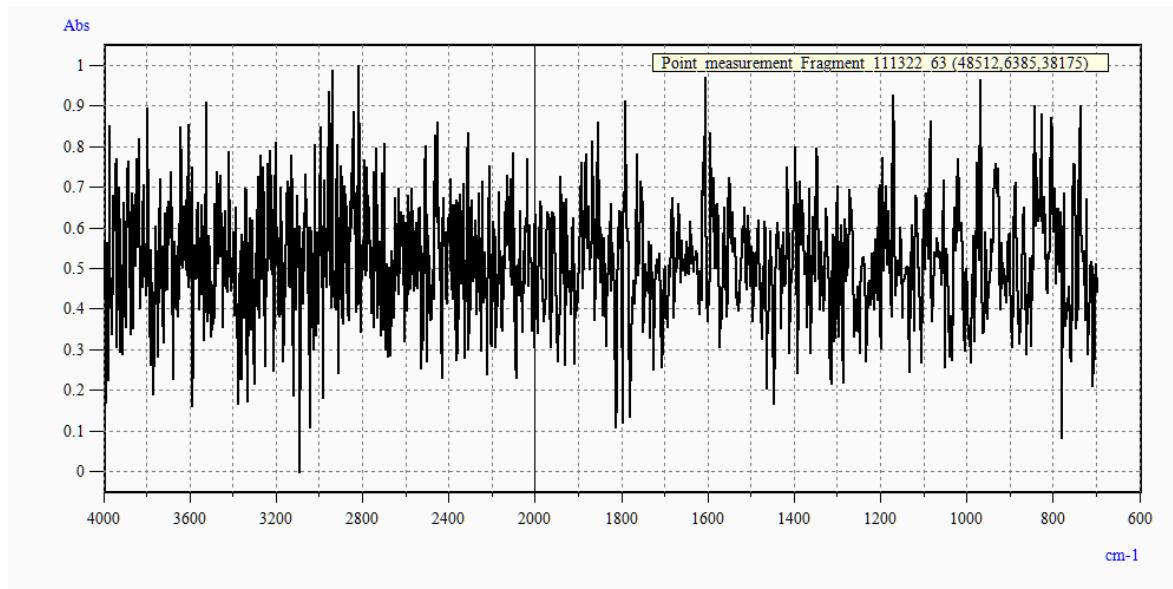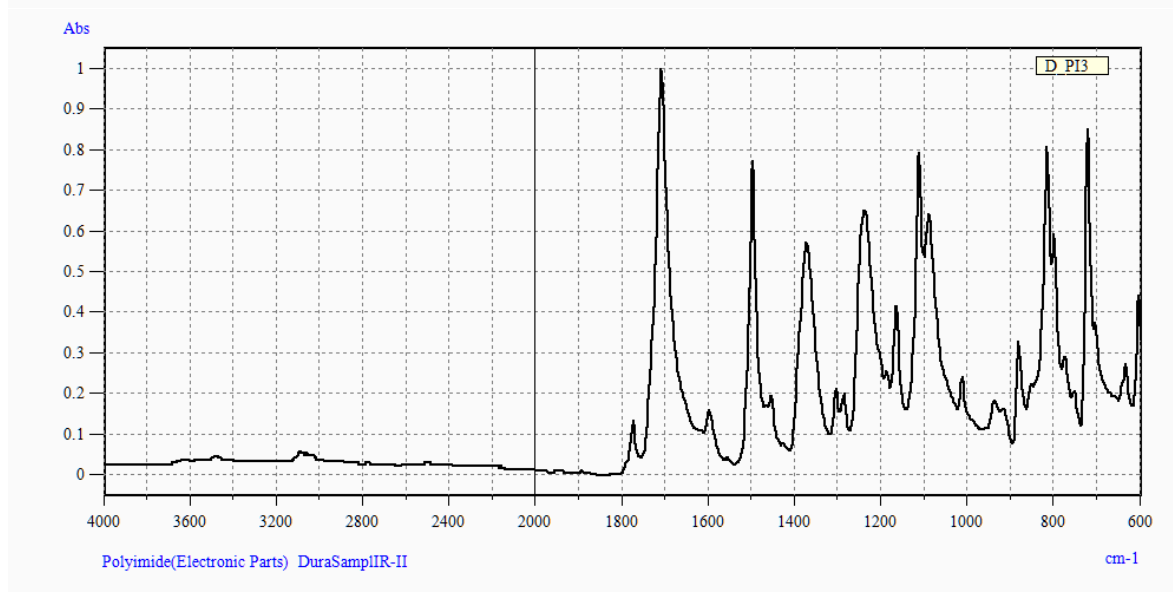

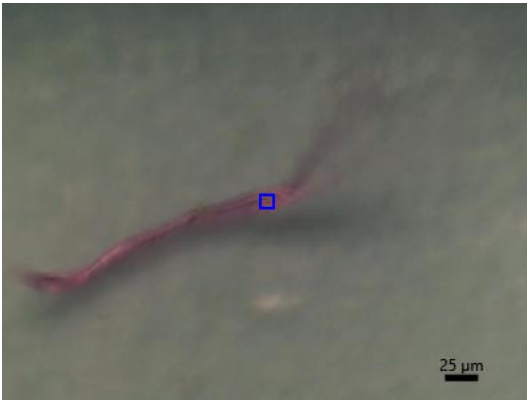

## Search Result Report

Filename : C:\Users\User\Desktop\UTSA  
 samples\UV042821HA22\Point\_measurement\_Fragment\_111322\_64.apit

Acquired Datetime : 2022/11/13 14:26:33

### ● Search Parameters

Library list :

IRs

Polymer2

ATR-Polymer2

T-Polymer2

Maximum hits:

200

Minimum quality :

0

Algorithm : DiffDeriv

| Score | Library      | Name    | Comment                                                                    |
|-------|--------------|---------|----------------------------------------------------------------------------|
| 589   | ATR-Polymer2 | D_Ht-BR | High-trans Butadiene<br>Rubber(High-trans Polubutadiene)<br>DuraSamplIR-II |

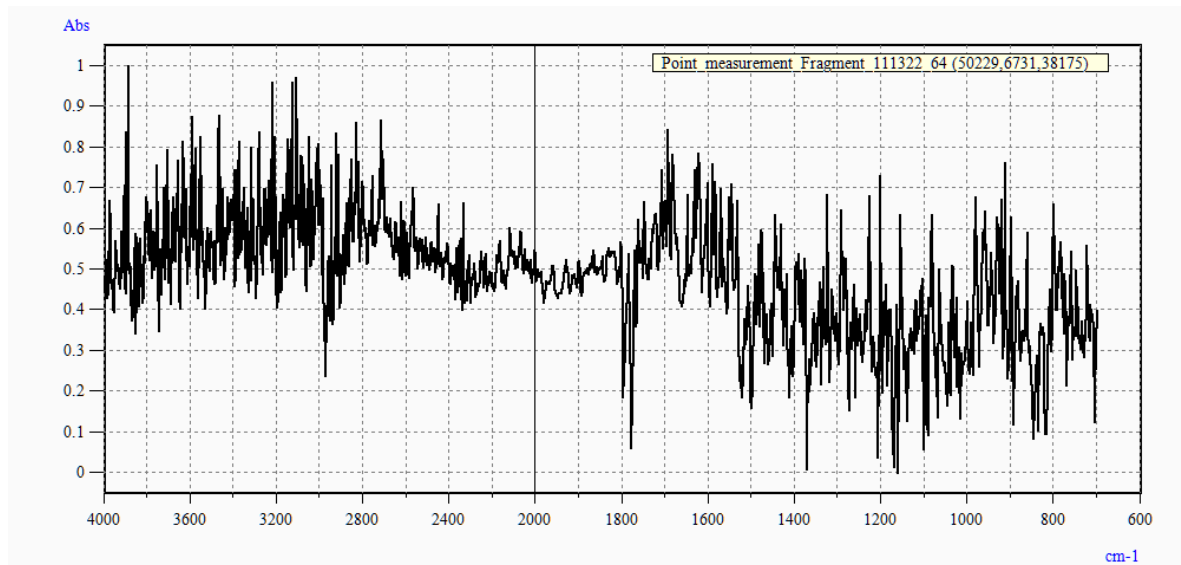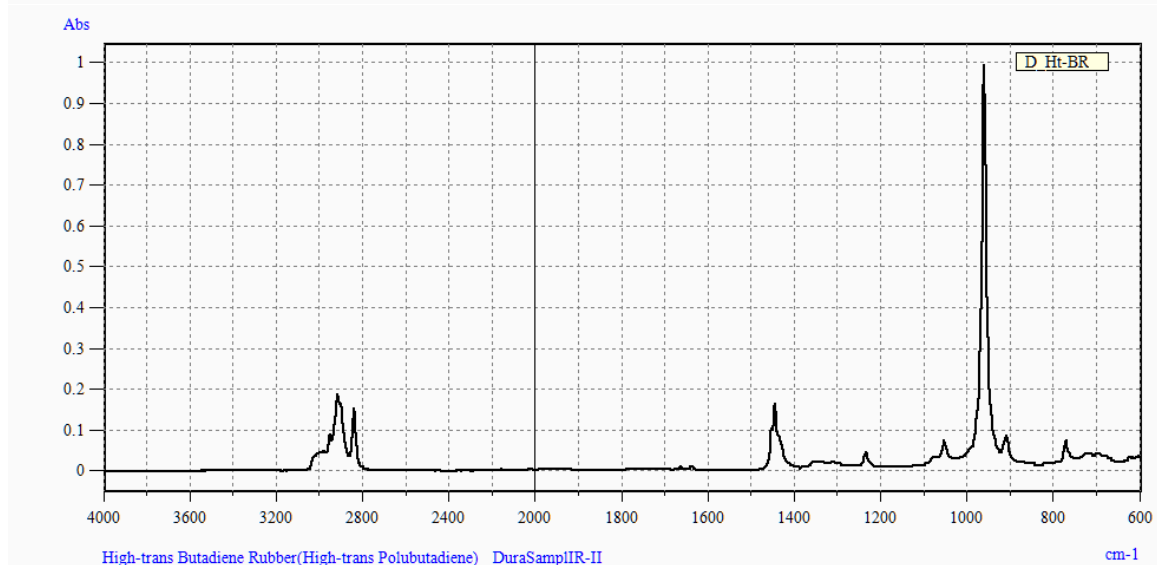

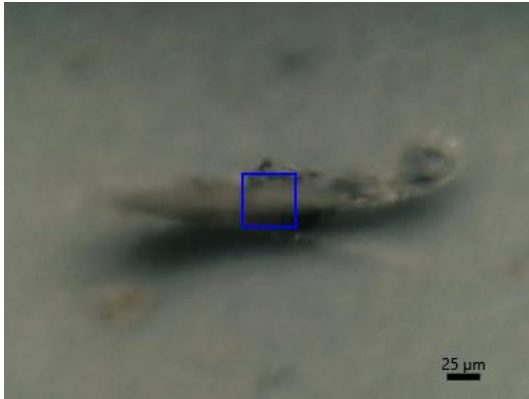

## Search Result Report

Filename : C:\Users\User\Desktop\UTSA  
 samples\UV042821HA31\Point\_measurement\_Fragment\_1.apit  
 Acquired Datetime : 2022/11/13 09:57:56

### ● Search Parameters

Library list :  
 IRs Polymer2  
 ATR-Polymer2  
 T-Polymer2  
 Maximum hits: 200  
 Minimum quality : 0  
 Algorithm : DiffDeriv

| Score | Library      | Name  | Comment                             |
|-------|--------------|-------|-------------------------------------|
| 578   | ATR-Polymer2 | D_PI2 | Polyimide(KAPTON)<br>DuraSamplIR-II |

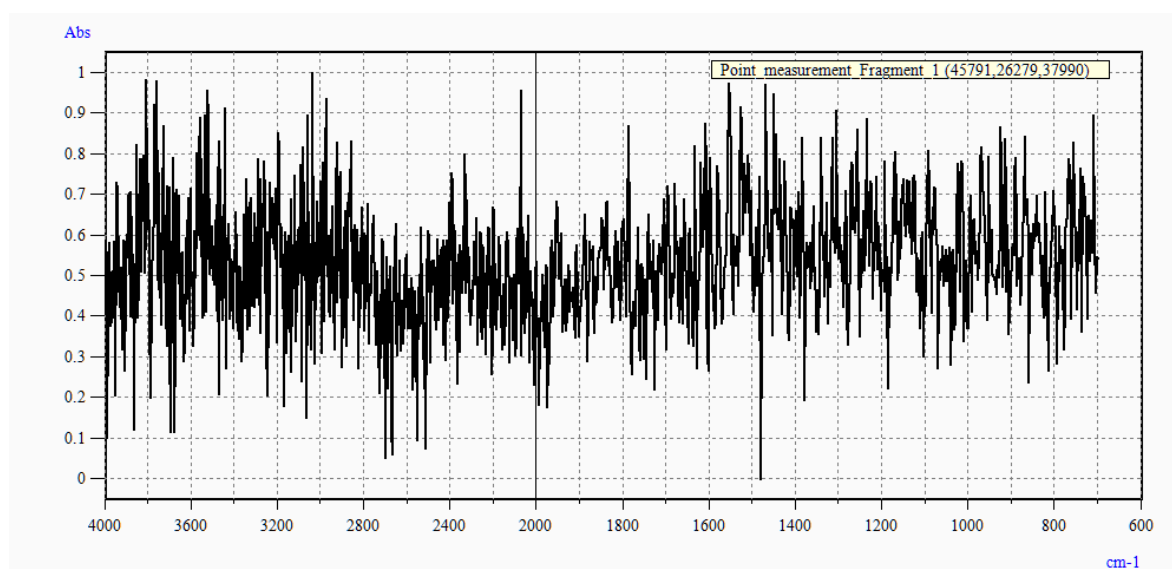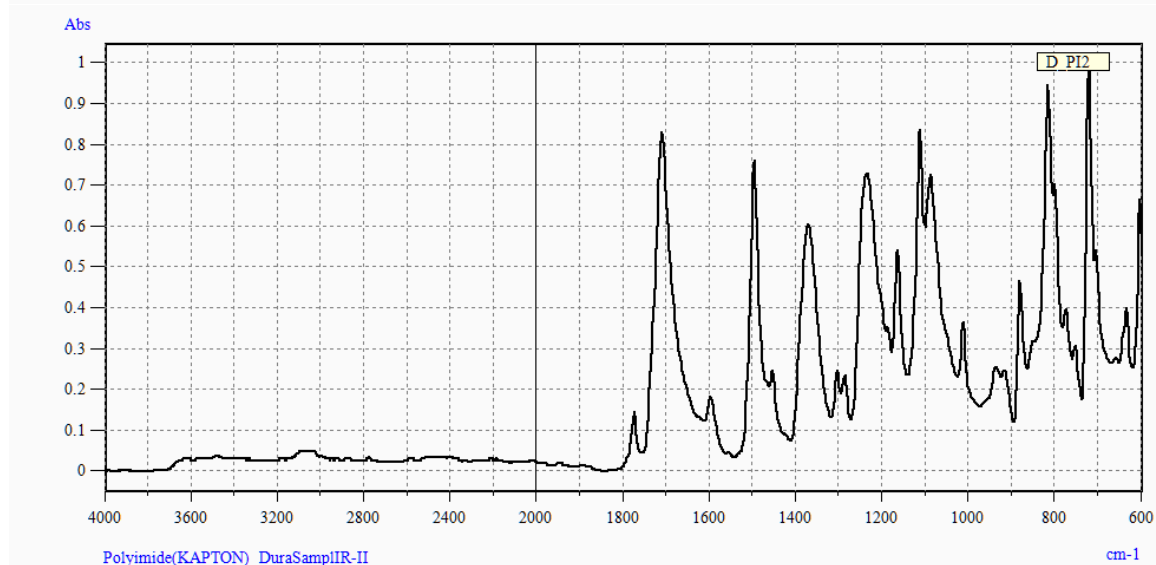

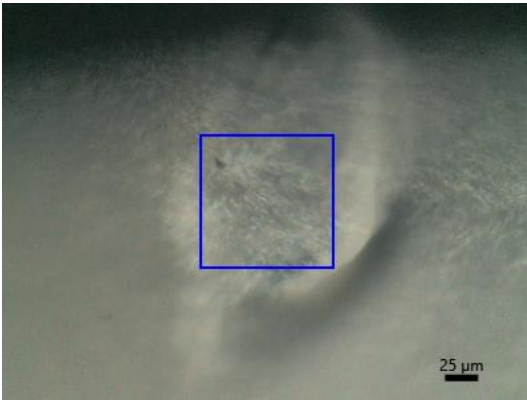

## Search Result Report

Filename : C:\Users\User\Desktop\UTSA  
 samples\UV042821HA31\Point\_measurement\_Fragment\_2.apit  
 Acquired Datetime : 2022/11/13 10:02:02

### ● Search Parameters

Library list :  
 IRs Polymer2  
 ATR-Polymer2  
 T-Polymer2  
 Maximum hits: 200  
 Minimum quality : 0  
 Algorithm : DiffDeriv

| Score | Library    | Name | Comment                                       |
|-------|------------|------|-----------------------------------------------|
| 640   | T-Polymer2 | PC   | Polycarbonate(PC)<br>Transmission(Microscope) |

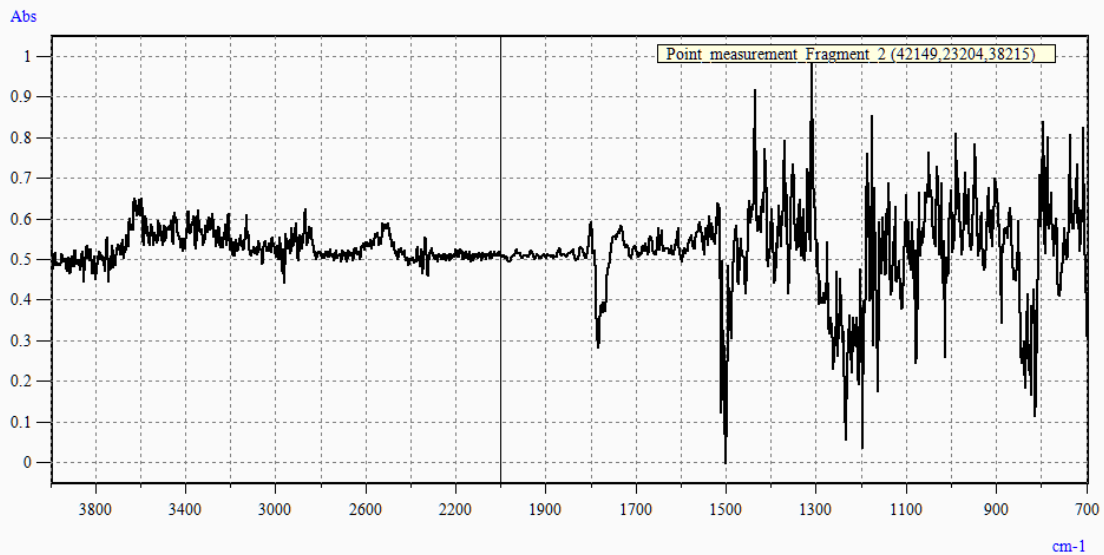

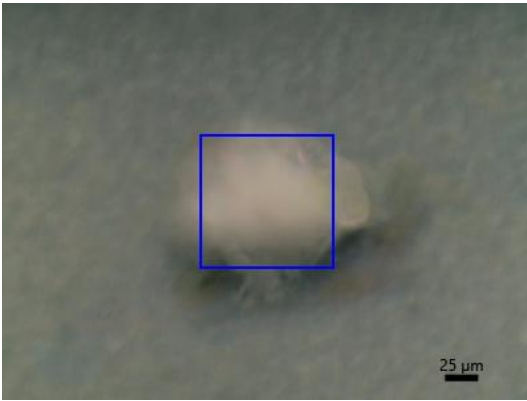

## Search Result Report

Filename : C:\Users\User\Desktop\UTSA  
 samples\UV042821HA31\Point\_measurement\_Fragment\_3.apit  
 Acquired Datetime : 2022/11/13 10:04:29

### ● Search Parameters

Library list :  
 IRs Polymer2  
 ATR-Polymer2  
 T-Polymer2  
 Maximum hits: 200  
 Minimum quality : 0  
 Algorithm : DiffDeriv

| Score | Library      | Name                      | Comment                                    |
|-------|--------------|---------------------------|--------------------------------------------|
| 587   | ATR-Polymer2 | D_Poly_4_Methyl_1_Pentene | Poly(4-Methyl-1 Pentene)<br>DuraSamplIR-II |

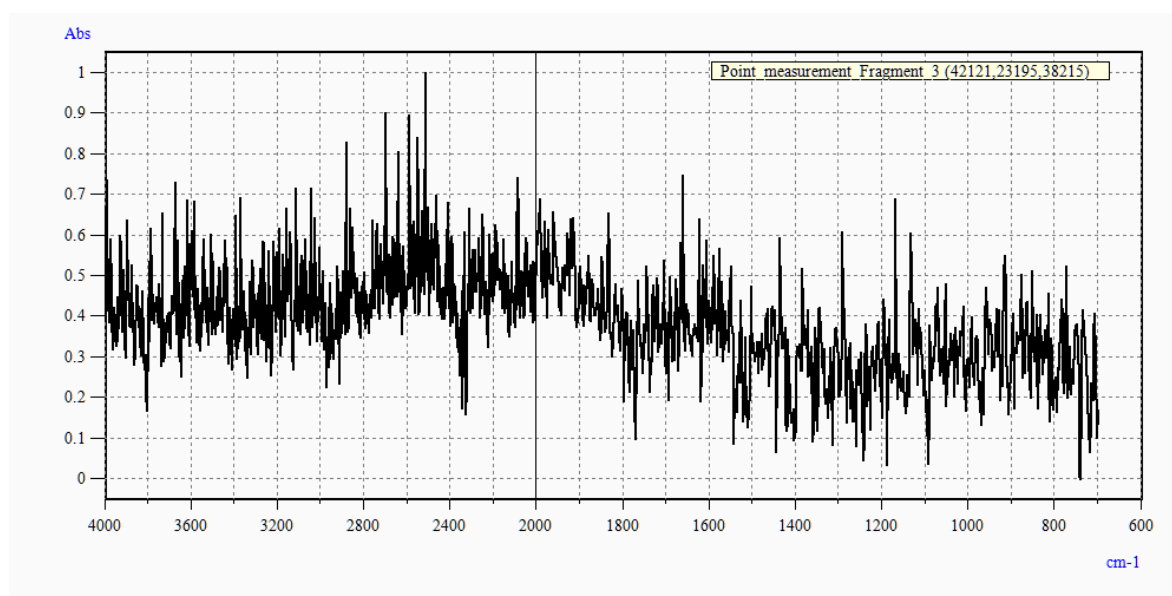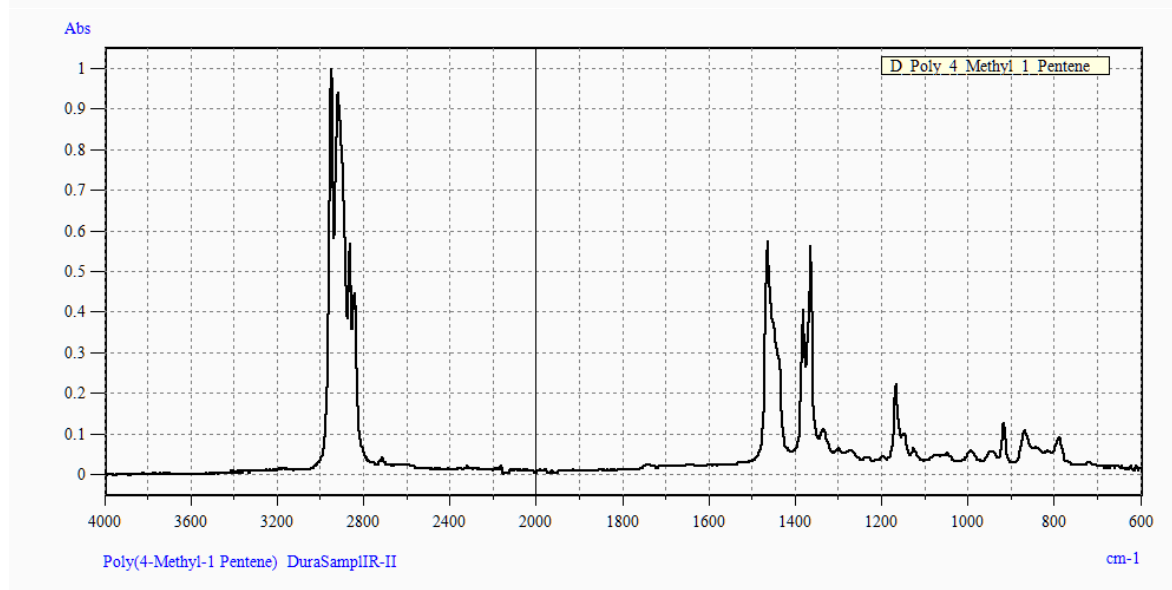

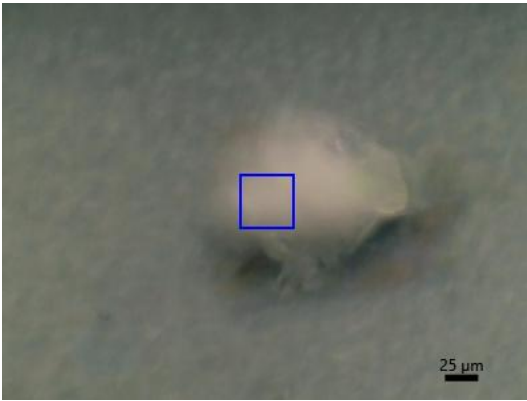

## Search Result Report

Filename : C:\Users\User\Desktop\UTSA  
 samples\UV042821HA31\Point\_measurement\_Fragment\_4.apit  
 Acquired Datetime : 2022/11/13 10:06:54

### ● Search Parameters

Library list :  
 IRs Polymer2  
 ATR-Polymer2  
 T-Polymer2  
 Maximum hits: 200  
 Minimum quality : 0  
 Algorithm : DiffDeriv

| Score | Library    | Name | Comment                                               |
|-------|------------|------|-------------------------------------------------------|
| 605   | T-Polymer2 | PPS  | Polyphenylene Sulfie(PPS)<br>Transmission(Microscope) |

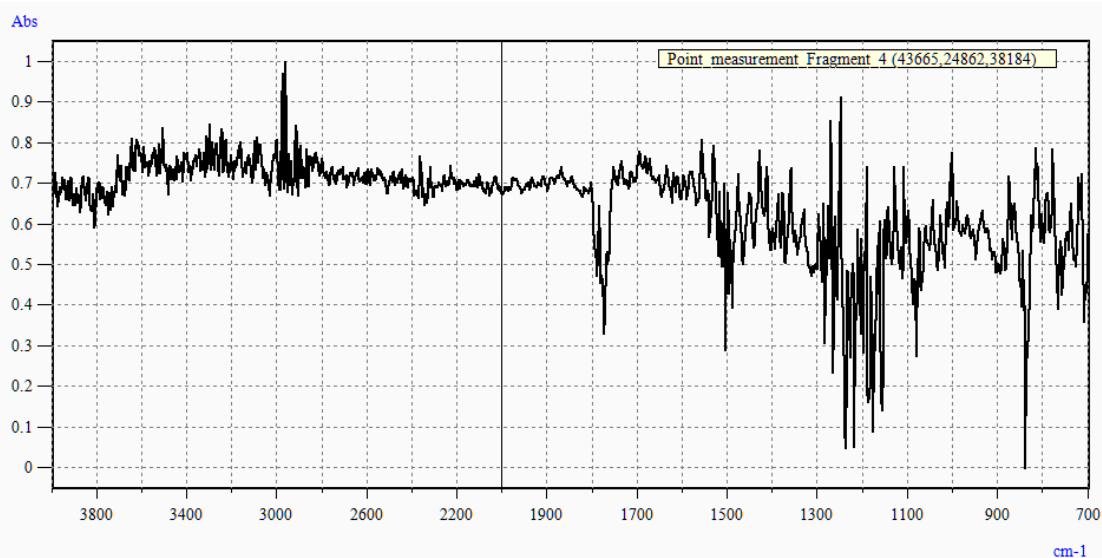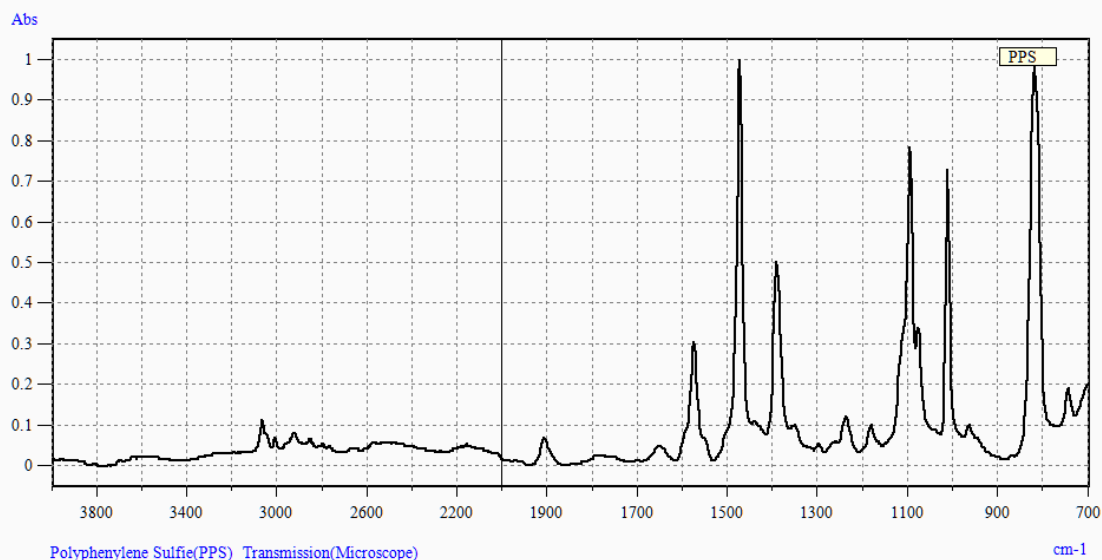

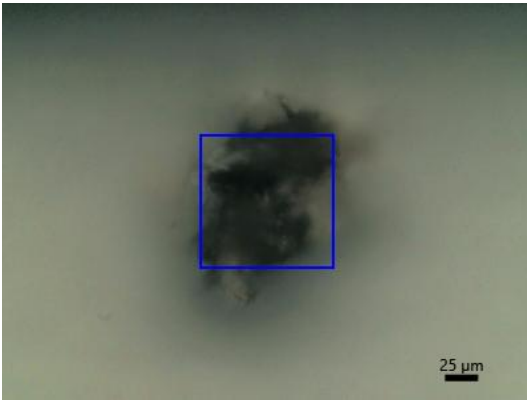

## Search Result Report

Filename : C:\Users\User\Desktop\UTSA  
 samples\UV042821HA31\Point\_measurement\_Fragment\_5.apit  
 Acquired Datetime : 2022/11/13 10:09:07

● **Search Parameters**

Library list :  
 IRs Polymer2  
 ATR-Polymer2  
 T-Polymer2  
 Maximum hits: 200  
 Minimum quality : 0  
 Algorithm : DiffDeriv

| Score | Library      | Name | Comment           |
|-------|--------------|------|-------------------|
| 582   | IRs Polymer2 | PP   | PolypropyleneFilm |

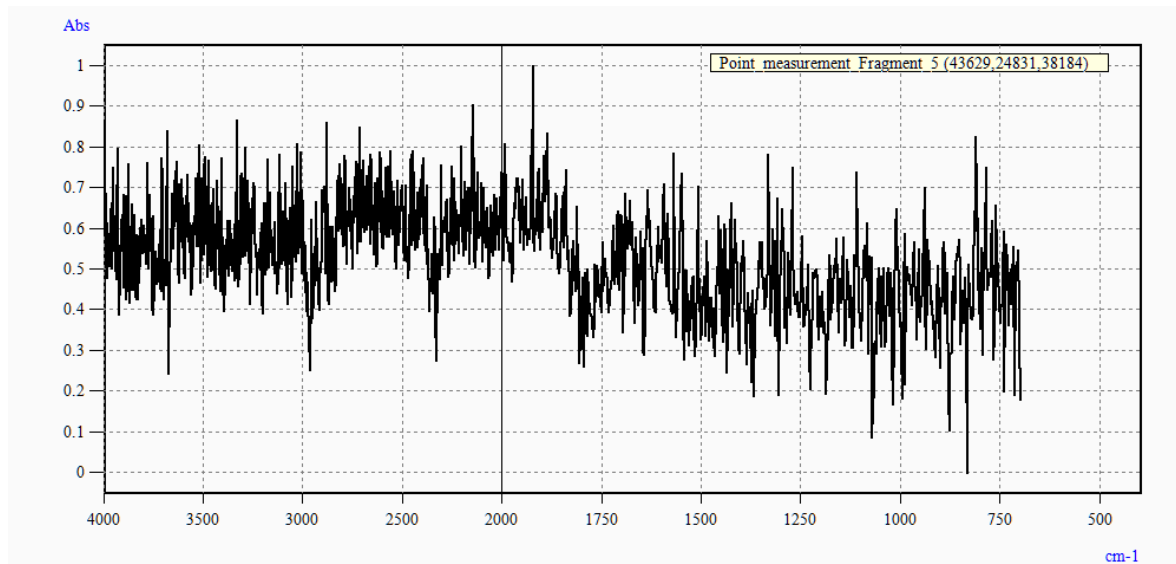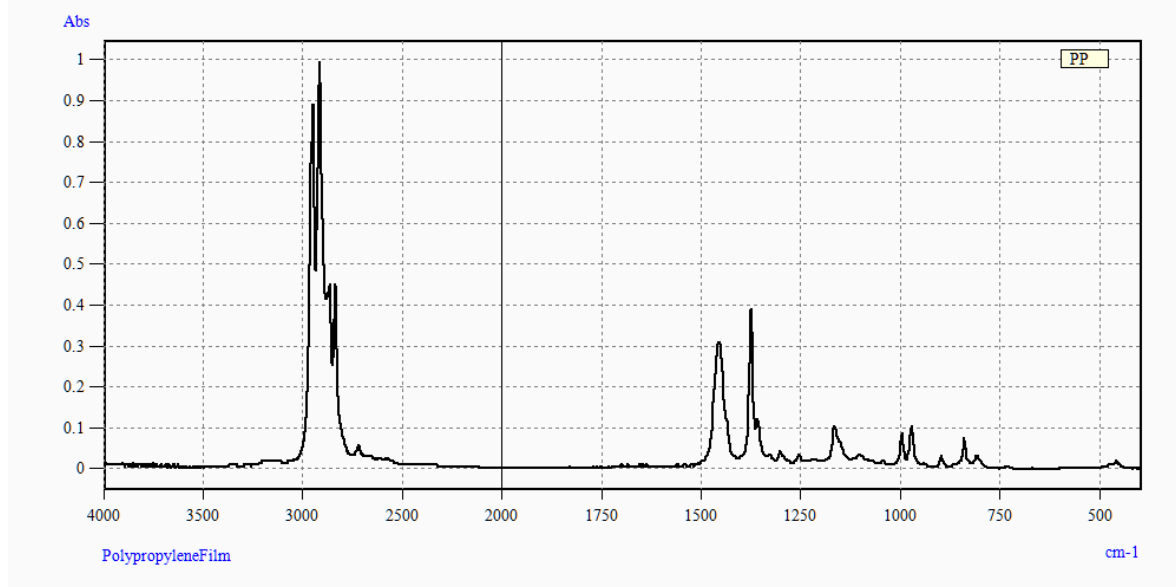

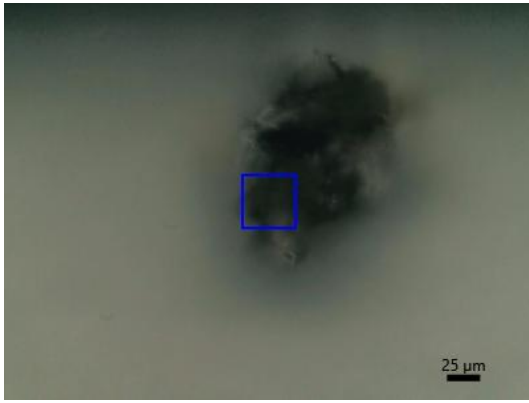

## Search Result Report

Filename : C:\Users\User\Desktop\UTSA  
 samples\UV042821HA31\Point\_measurement\_Fragment\_111322\_5.apit  
 Acquired Datetime : 2022/11/13 10:17:13

### ● Search Parameters

Library list :  
 IRs Polymer2  
 ATR-Polymer2  
 T-Polymer2  
 Maximum hits: 200  
 Minimum quality : 0  
 Algorithm : DiffDeriv

| Score | Library      | Name        | Comment                                          |
|-------|--------------|-------------|--------------------------------------------------|
| 583   | ATR-Polymer2 | D_Additive1 | Polymer Additive(Irganox 1010)<br>DuraSamplIR-II |

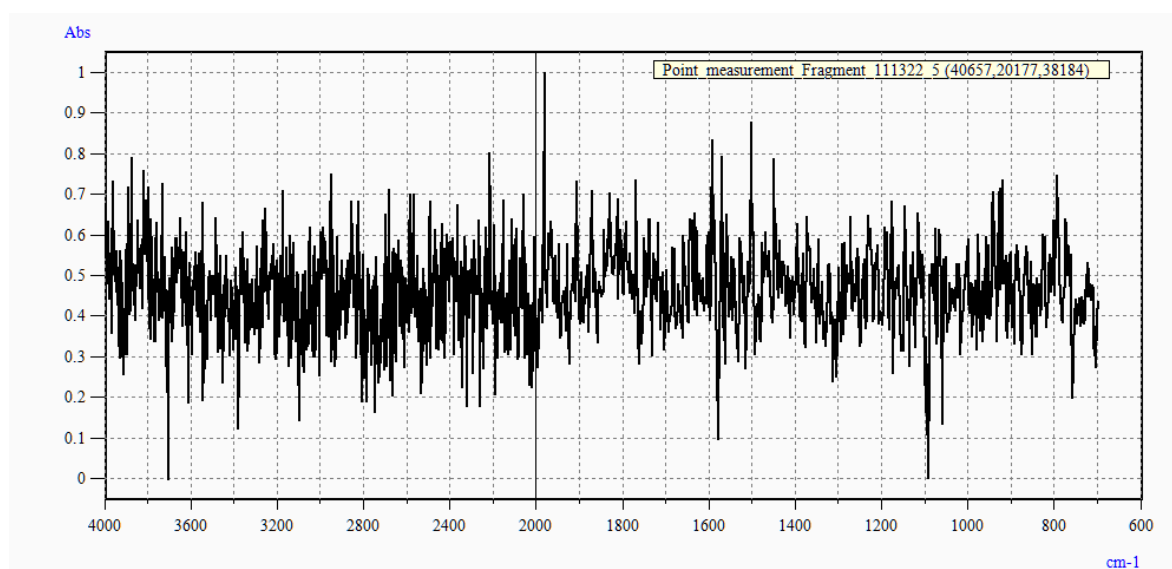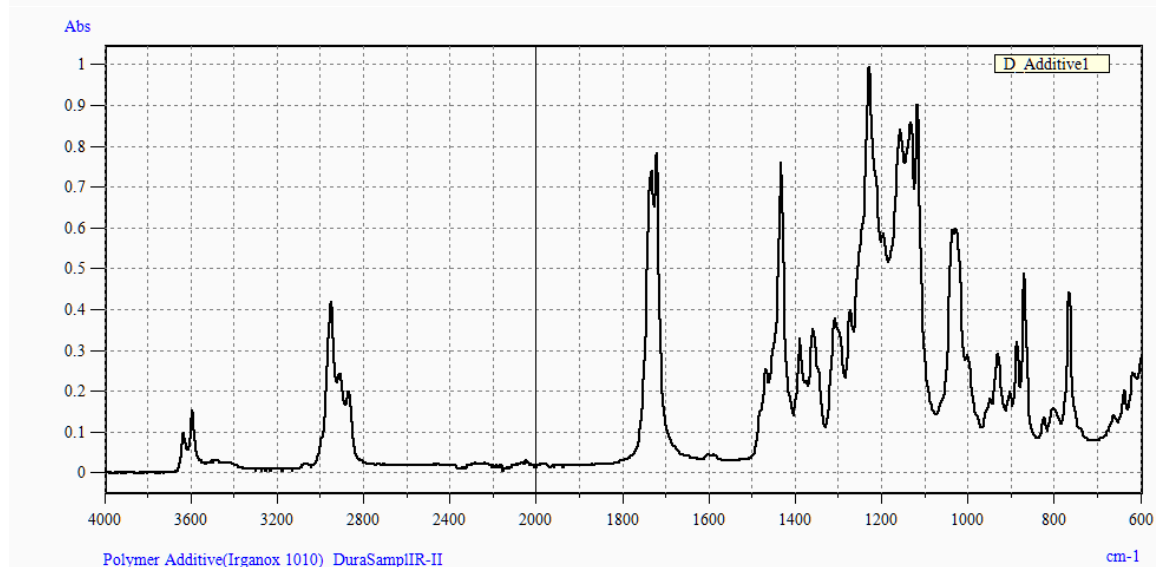

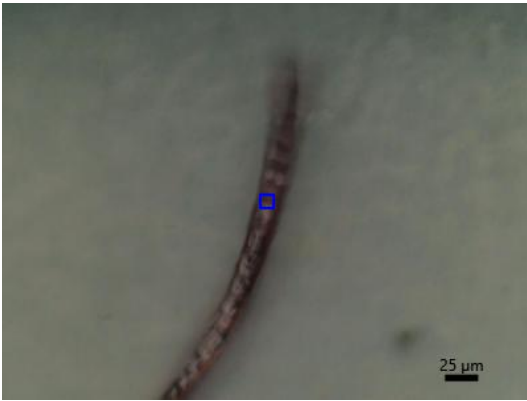

# Search Result Report

Filename : C:\Users\User\Desktop\UTSA samples\UV042821HA31\Point\_measurement\_Fragment\_111322\_6.apit

Acquired Datetime : 2022/11/13 10:22:30

● **Search Parameters**

Library list :

IRs Polymer2

ATR-Polymer2

T-Polymer2

Maximum hits: 200

Minimum quality : 0

Algorithm : DiffDeriv

| Score | Library      | Name     | Comment                                           |
|-------|--------------|----------|---------------------------------------------------|
| 628   | ATR-Polymer2 | D_Epoxy1 | Epoxy Resin(Electronic Parts-1)<br>DuraSamplIR-II |

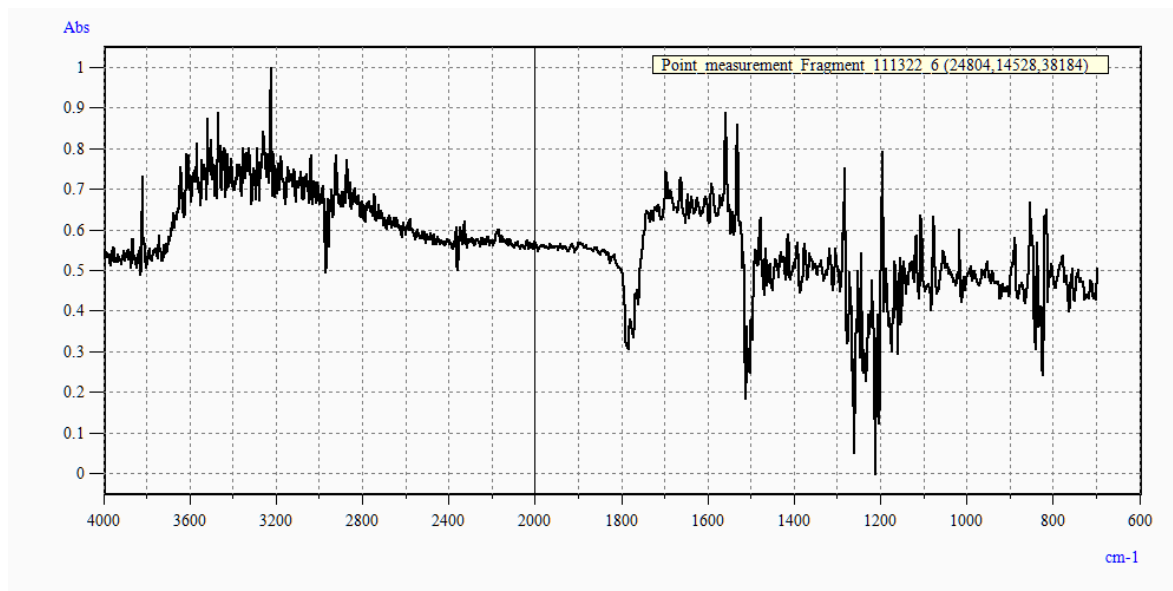

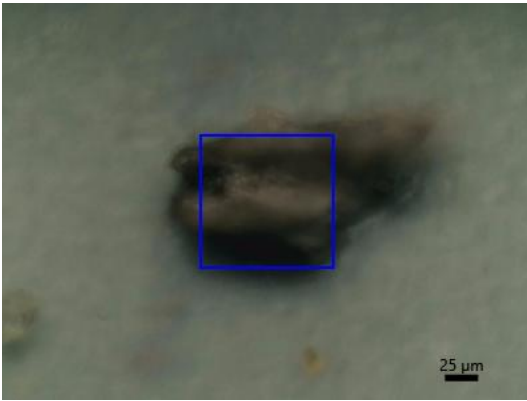

## Search Result Report

Filename : C:\Users\User\Desktop\UTSA  
 samples\UV042821HA31\Point\_measurement\_Fragment\_111322\_7.apit  
 Acquired Datetime : 2022/11/13 10:29:16

### ● Search Parameters

Library list :  
 IRs Polymer2  
 ATR-Polymer2  
 T-Polymer2  
 Maximum hits: 200  
 Minimum quality : 0  
 Algorithm : DiffDeriv

| Score | Library    | Name | Comment                                               |
|-------|------------|------|-------------------------------------------------------|
| 576   | T-Polymer2 | PPS  | Polyphenylene Sulfie(PPS)<br>Transmission(Microscope) |

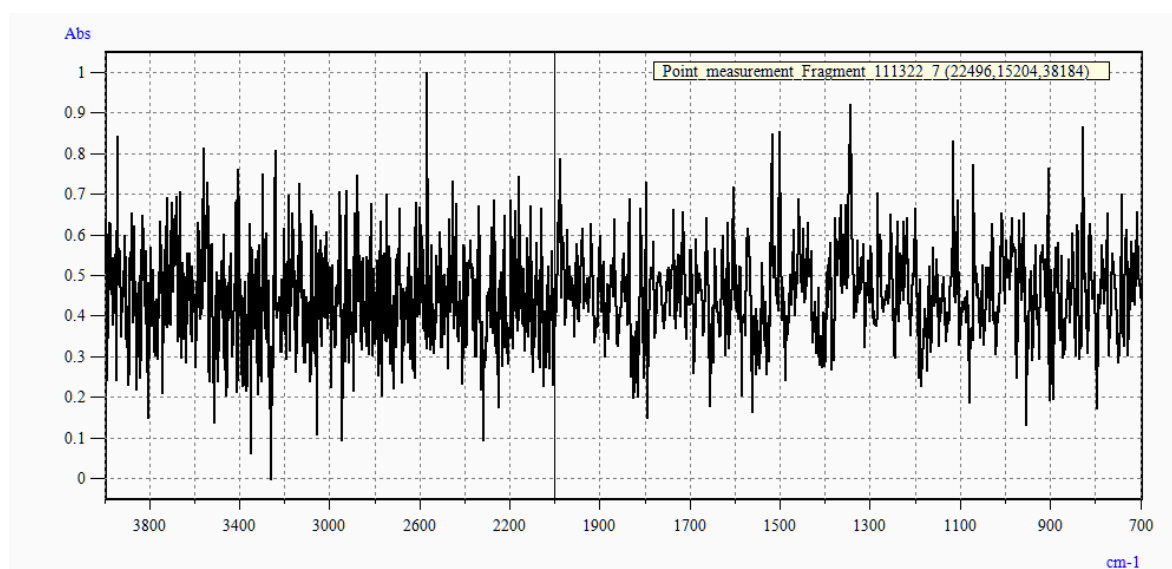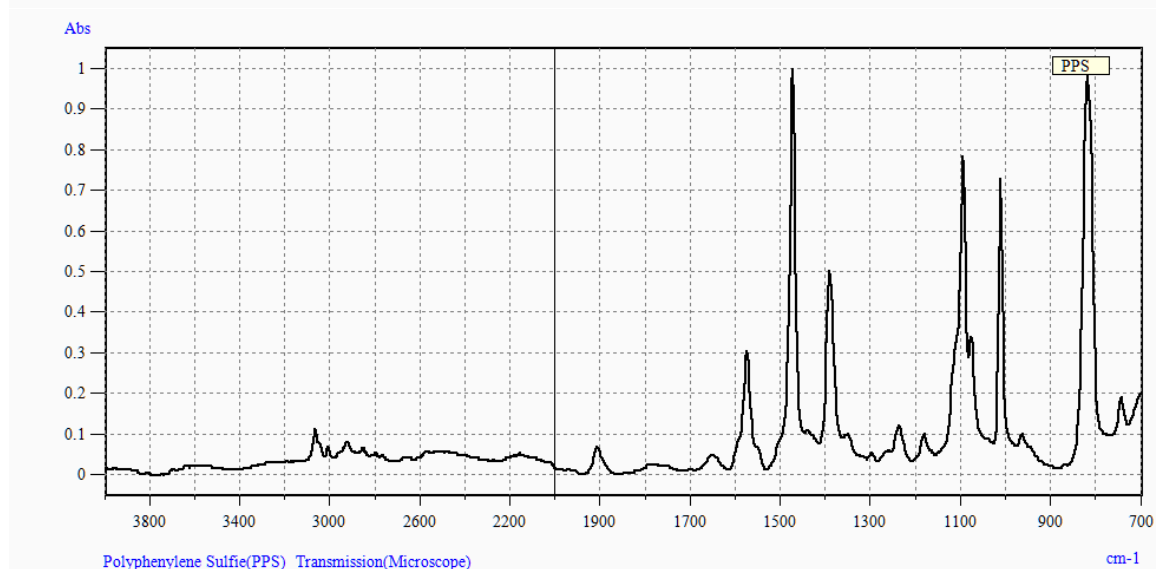

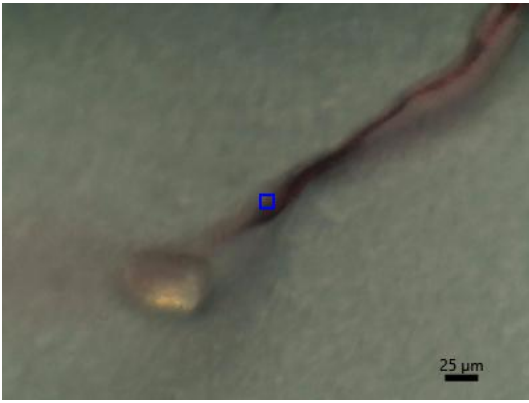

## Search Result Report

Filename : C:\Users\User\Desktop\UTSA  
 samples\UV042821HA31\Point\_measurement\_Fragment\_111322\_8.apit  
 Acquired Datetime : 2022/11/13 10:48:42

### ● Search Parameters

Library list :  
 IRs Polymer2  
 ATR-Polymer2  
 T-Polymer2  
 Maximum hits: 200  
 Minimum quality : 0  
 Algorithm : DiffDeriv

| Score | Library      | Name  | Comment                             |
|-------|--------------|-------|-------------------------------------|
| 601   | ATR-Polymer2 | D_PI2 | Polyimide(KAPTON)<br>DuraSamplIR-II |

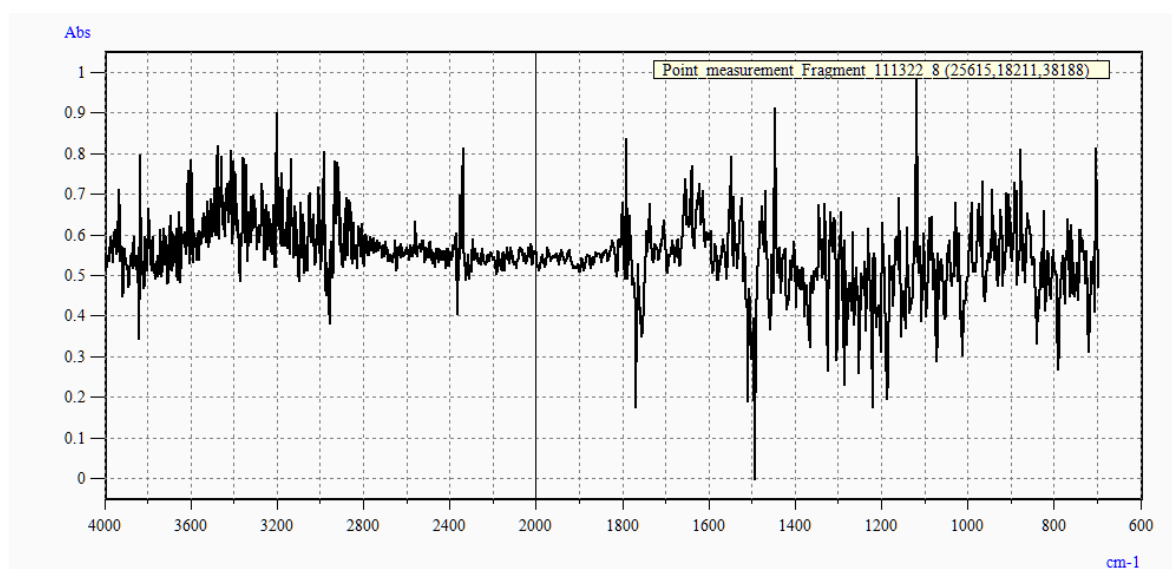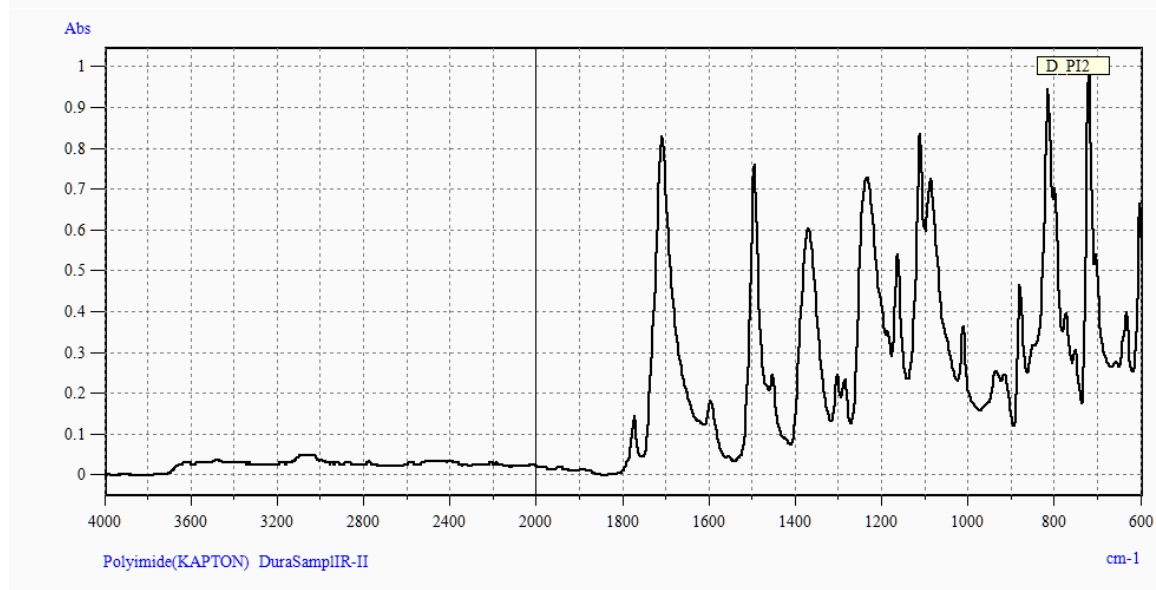

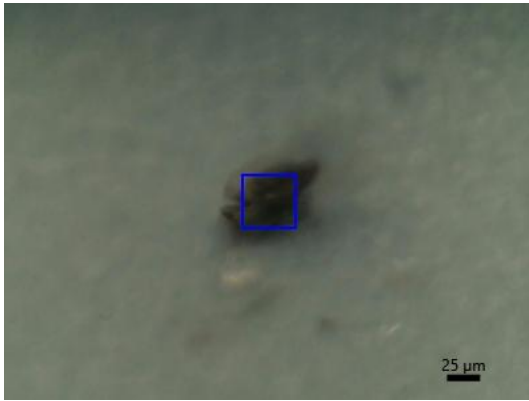

## Search Result Report

Filename : C:\Users\User\Desktop\UTSA  
 samples\UV042821HA31\Point\_measurement\_Fragment\_111322\_9.apit  
 Acquired Datetime : 2022/11/13 10:51:03

### ● Search Parameters

Library list : Polymer2  
 IRs  
 ATR-Polymer2  
 T-Polymer2  
 Maximum hits: 200  
 Minimum quality : 0  
 Algorithm : DiffDeriv

| Score | Library    | Name     | Comment                                                      |
|-------|------------|----------|--------------------------------------------------------------|
| 578   | T-Polymer2 | IR-trans | trans-Polyisoprene Rubber(IR-trans) Transmission(Microscope) |

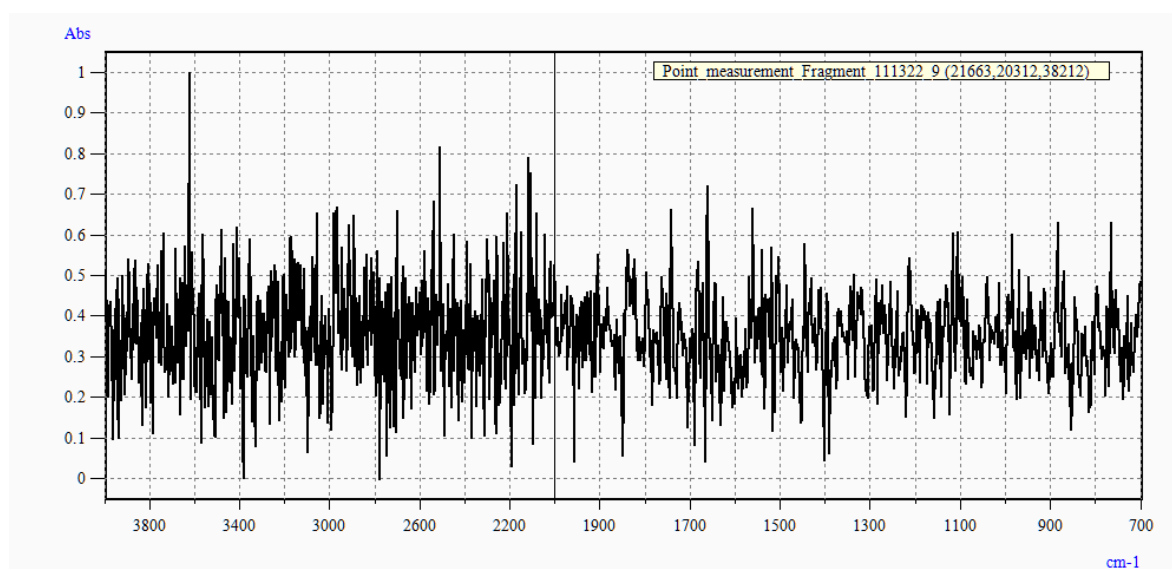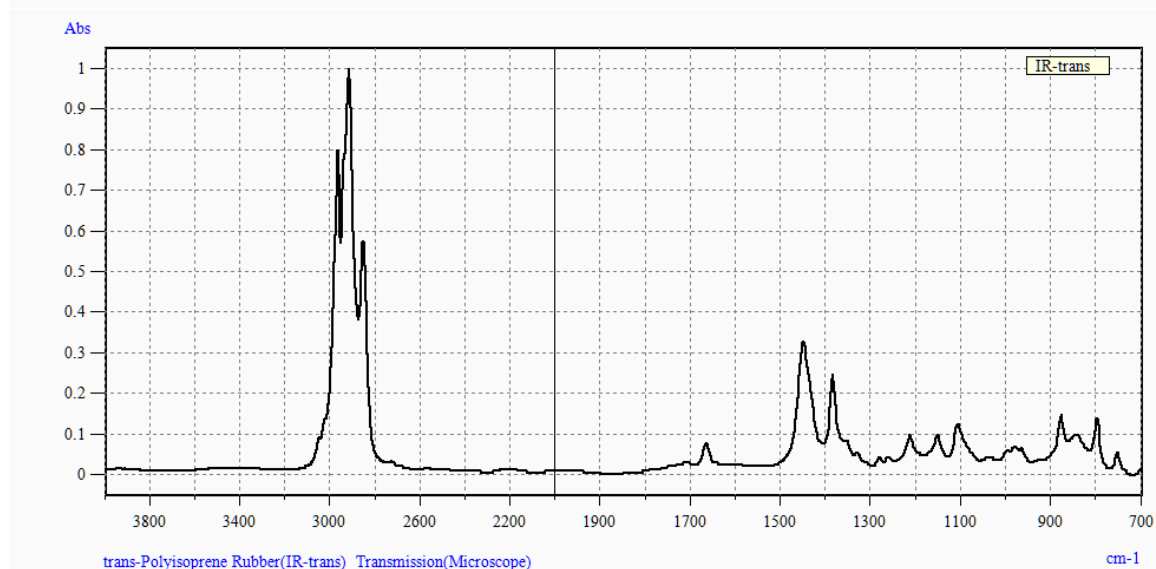

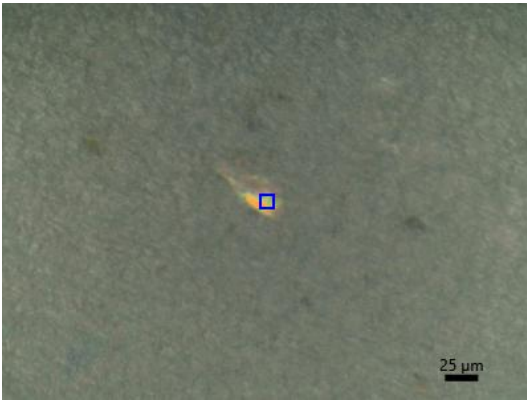

## Search Result Report

Filename : C:\Users\User\Desktop\UTSA  
samples\UV042821HA31\Point\_measurement\_Fragment\_111322\_10.apit

Acquired Datetime : 2022/11/13 10:52:57

● **Search Parameters**

Library list :

IRs Polymer2

ATR-Polymer2

T-Polymer2

Maximum hits: 200

Minimum quality : 0

Algorithm : DiffDeriv

| Score | Library      | Name          | Comment                                                                                                                                                                                        |
|-------|--------------|---------------|------------------------------------------------------------------------------------------------------------------------------------------------------------------------------------------------|
| 595   | IRs Polymer2 | IrganoxMD1024 | Irganox MD1024 HINDERED PHENOLIC ANTIOXIDANT-METAL DEACTIVATOR1,2-BIS(3,5-DI-tert-BUTYL-4-HYDROXYHYDROCINNAMOYL)HYDRAZINE; HINDERED PHENOLC34H52O4N2CAS NO. 32687-78-8ATR/diamond ATRcorrected |

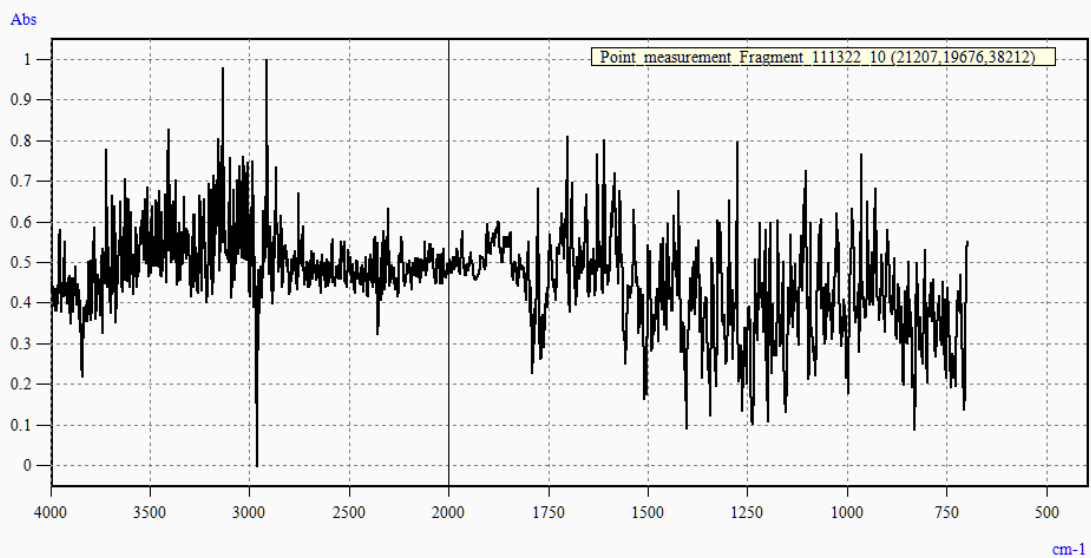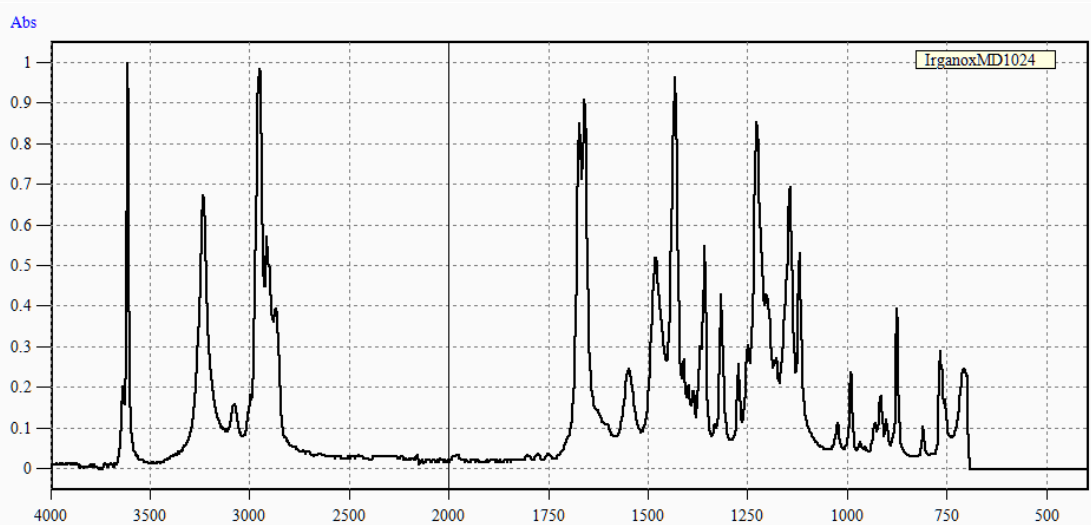

Irganox MD1024 HINDERED PHENOLIC ANTIOXIDANT-METAL DEACTIVATOR1,2-BIS(3,5-DI-tert-BUTYL-4-HYDROXYHYDROCINNAMYL)HYD

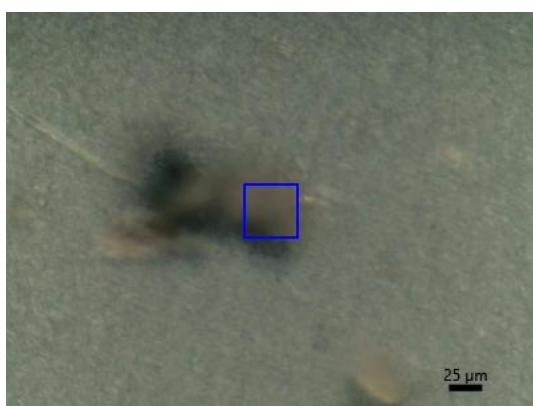

## Search Result Report

Filename : C:\Users\User\Desktop\UTSA  
 samples\UV042821HA31\Point\_measurement\_Fragment\_111322\_11.apit  
 Acquired Datetime : 2022/11/13 11:00:06

### ● Search Parameters

Library list :  
 IRs Polymer2  
 ATR-Polymer2  
 T-Polymer2  
 Maximum hits: 200  
 Minimum quality : 0  
 Algorithm : DiffDeriv

| Score | Library    | Name | Comment                                       |
|-------|------------|------|-----------------------------------------------|
| 629   | T-Polymer2 | PC   | Polycarbonate(PC)<br>Transmission(Microscope) |

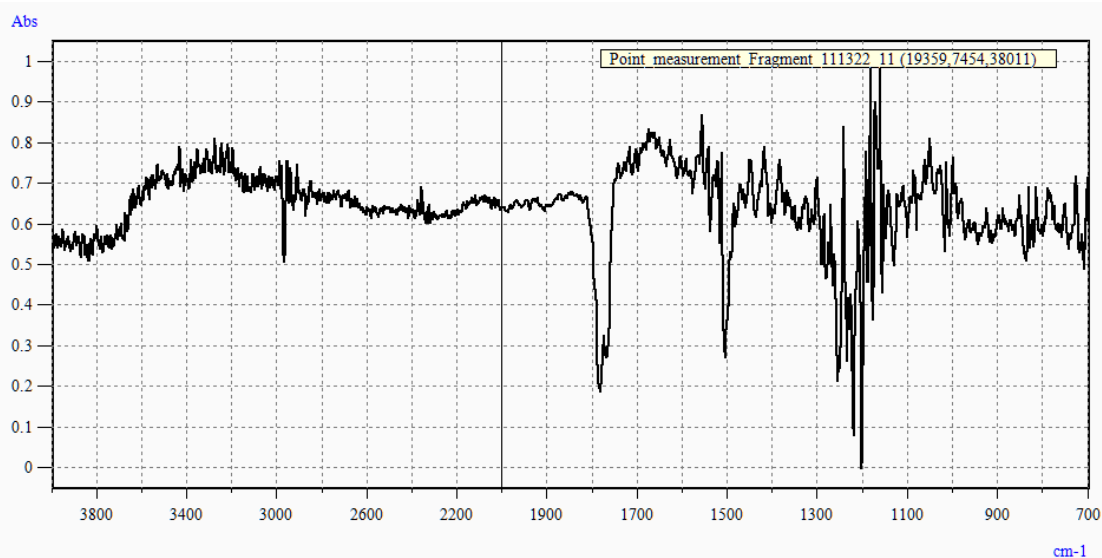

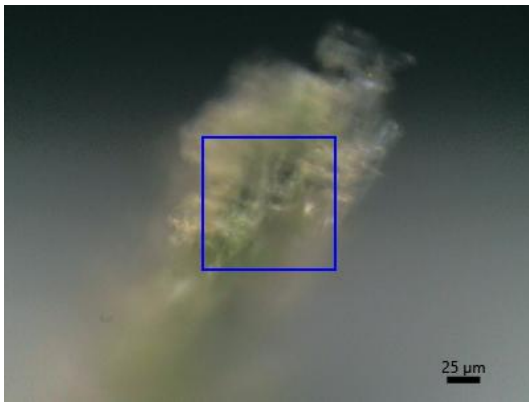

## Search Result Report

Filename : C:\Users\User\Desktop\UTSA  
samples\UV042821HA31\Point\_measurement\_Fragment\_111322\_12.apit

Acquired Datetime : 2022/11/13 11:04:42

● **Search Parameters**

Library list :

IRs Polymer2

ATR-Polymer2

T-Polymer2

Maximum hits: 200

Minimum quality : 0

Algorithm : DiffDeriv

| Score | Library      | Name  | Comment                                                                                                                    |
|-------|--------------|-------|----------------------------------------------------------------------------------------------------------------------------|
| 597   | IRs Polymer2 | DLTDP | DLTDPANTIOXIDANT (CONTAINING<br>SULFUR)DILAURYL<br>THIODIPROPIONATEC30H58O4SCAS<br>NO. 123-28-4ATR/diamond<br>ATRcorrected |

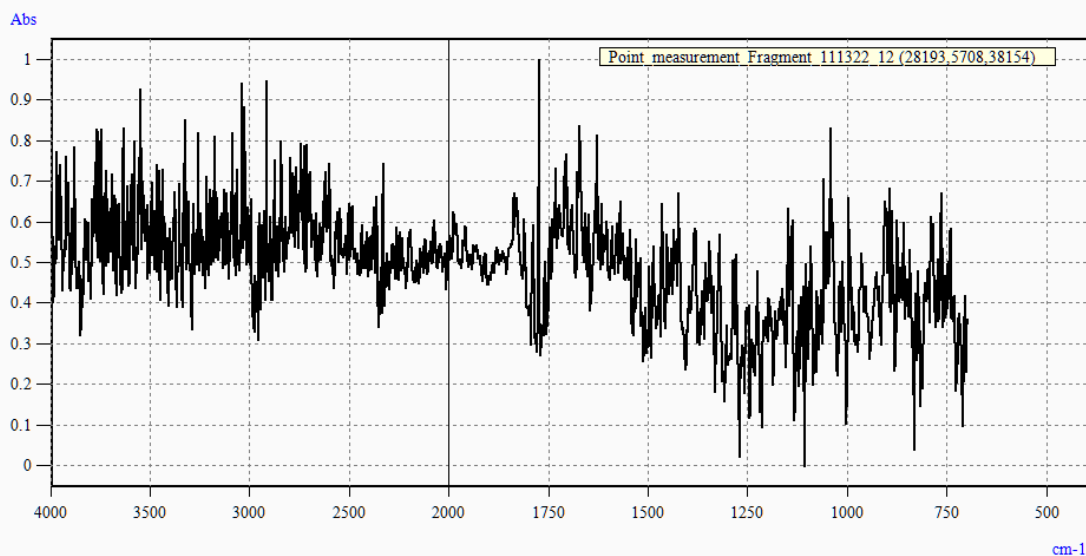

DLTDPANTIOXIDANT (CONTAINING SULFUR)DILAURYL THIODIPROPIONATEC30H58O4SCAS NO. 123-28-4ATR/diamond ATRcorrecte@<sup>m</sup>-1

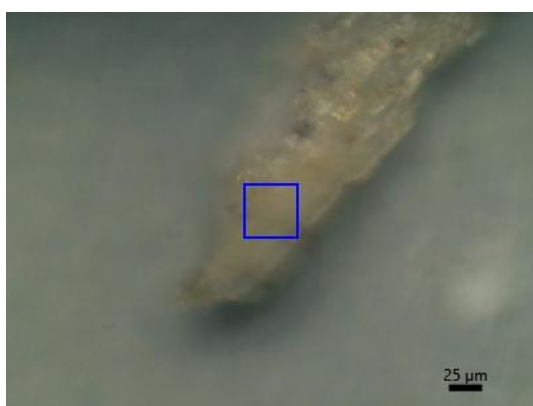

## Search Result Report

Filename : C:\Users\User\Desktop\UTSA  
 samples\UV042821HA31\Point\_measurement\_Fragment\_111322\_13.apit  
 Acquired Datetime : 2022/11/13 11:09:12

### ● Search Parameters

Library list :  
 IRs Polymer2  
 ATR-Polymer2  
 T-Polymer2  
 Maximum hits: 200  
 Minimum quality : 0  
 Algorithm : DiffDeriv

| Score | Library      | Name        | Comment                                          |
|-------|--------------|-------------|--------------------------------------------------|
| 588   | ATR-Polymer2 | D_Additive3 | Polymer Additive(Irganox 1330)<br>DuraSamplIR-II |

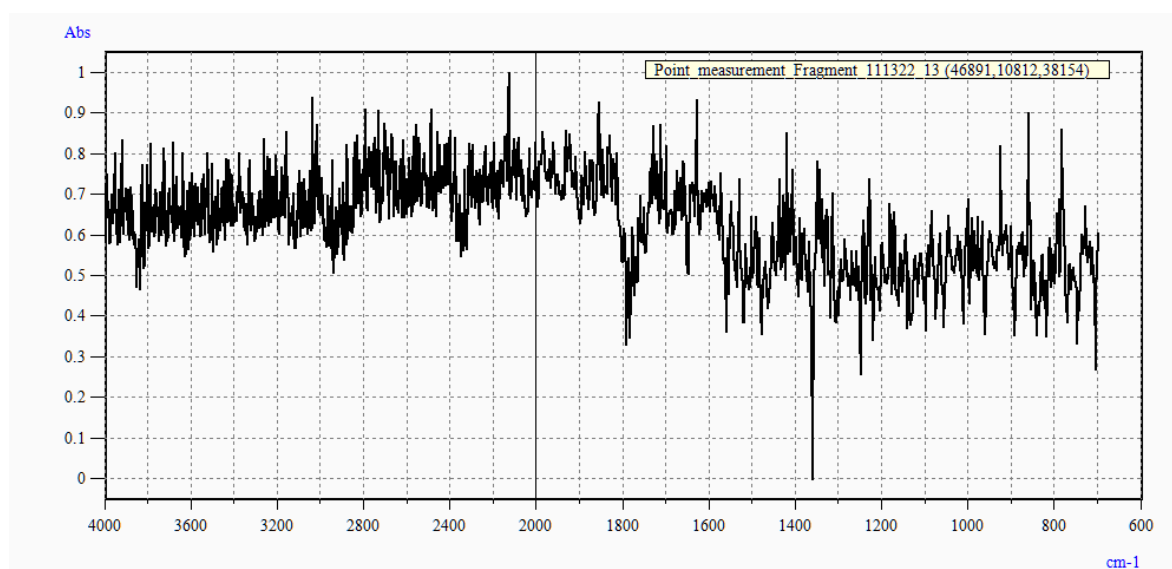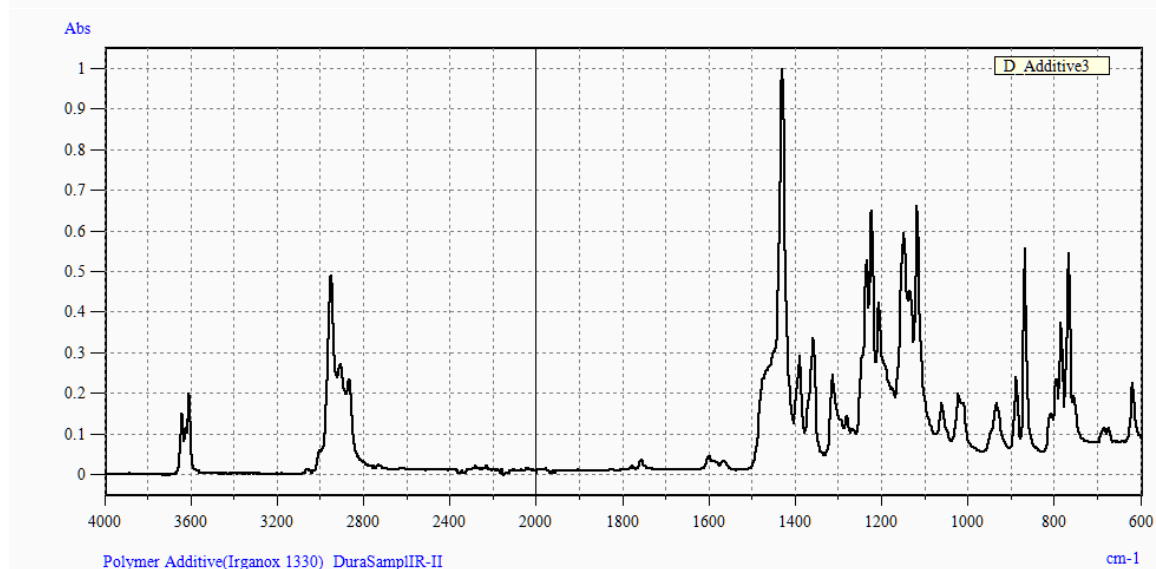

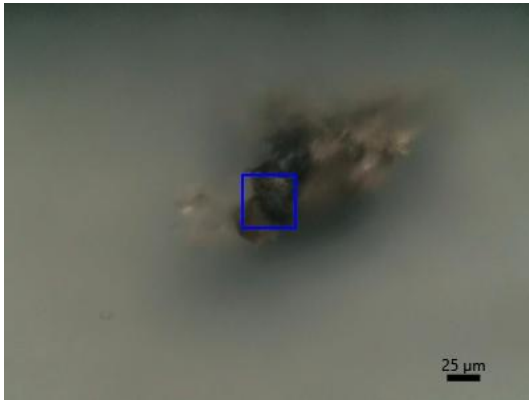

## Search Result Report

Filename : C:\Users\User\Desktop\UTSA  
 samples\UV042821HA31\Point\_measurement\_Fragment\_111322\_14.apit  
 Acquired Datetime : 2022/11/13 11:13:37

### ● Search Parameters

Library list :  
 IRs Polymer2  
 ATR-Polymer2  
 T-Polymer2  
 Maximum hits: 200  
 Minimum quality : 0  
 Algorithm : DiffDeriv

| Score | Library      | Name | Comment                                          |
|-------|--------------|------|--------------------------------------------------|
| 590   | IRs Polymer2 | PC   | Polycarbonate/CD-<br>ROMATR/diamond ATRcorrected |

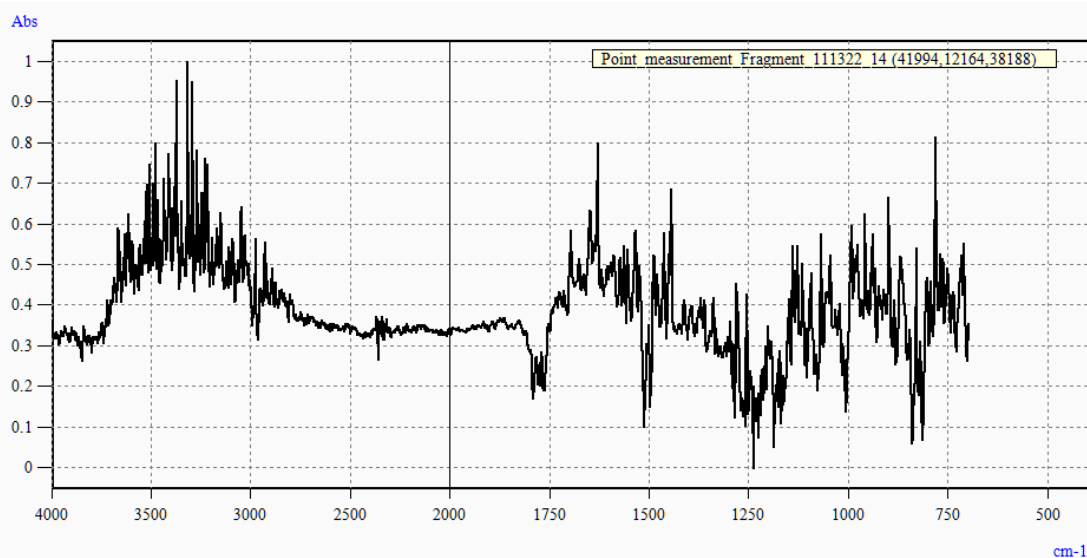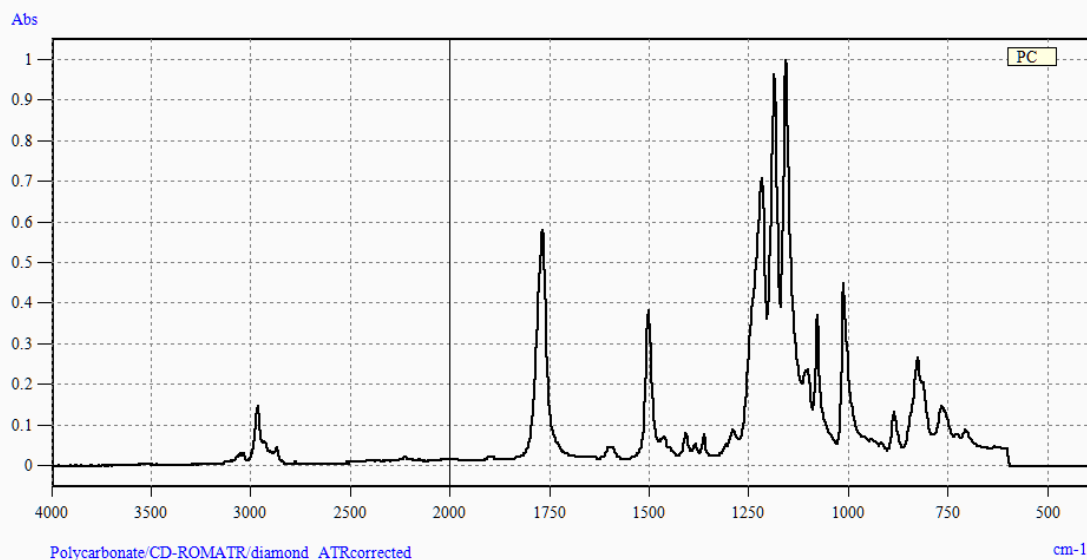

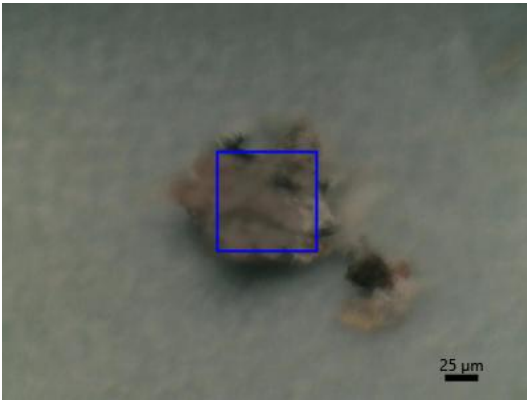

# Search Result Report

Filename : C:\Users\User\Desktop\UTSA samples\UV042821HA31\Point\_measurement\_Fragment\_111322\_15.apit

Acquired Datetime : 2022/11/13 11:15:50

● **Search Parameters**

Library list :

IRs

Polymer2

ATR-Polymer2

T-Polymer2

Maximum hits:

200

Minimum quality :

0

Algorithm : DiffDeriv

| Score | Library    | Name   | Comment                                 |
|-------|------------|--------|-----------------------------------------|
| 600   | T-Polymer2 | Epoxy7 | Epoxy Resin<br>Transmission(Microscope) |

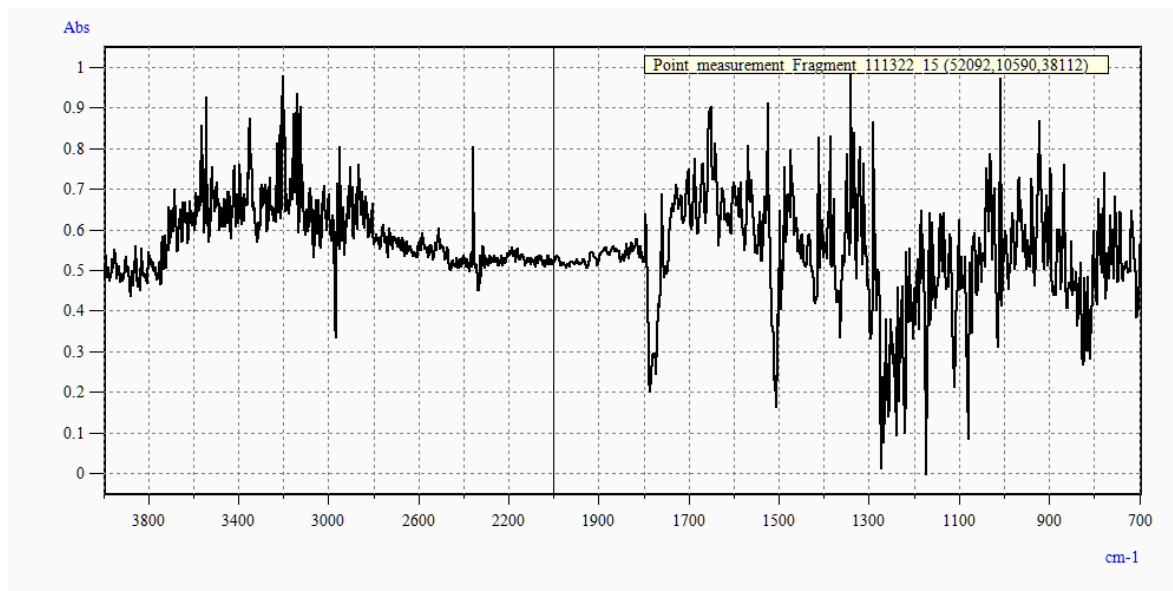

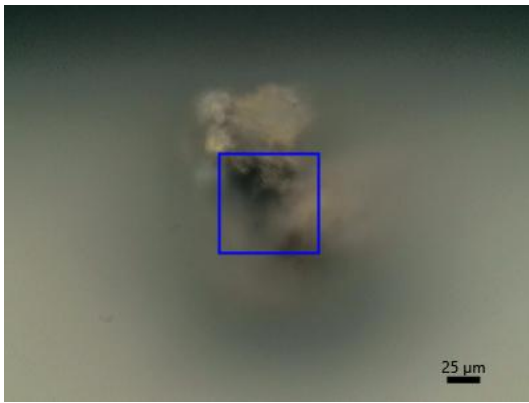

## Search Result Report

Filename : C:\Users\User\Desktop\UTSA  
samples\UV042821HA31\Point\_measurement\_Fragment\_111322\_16.apit  
Acquired Datetime : 2022/11/13 11:19:14

### ● Search Parameters

Library list :  
IRs Polymer2  
ATR-Polymer2  
T-Polymer2  
Maximum hits: 200  
Minimum quality : 0  
Algorithm : DiffDeriv

| Score | Library    | Name                | Comment                                       |
|-------|------------|---------------------|-----------------------------------------------|
| 598   | T-Polymer2 | T_1_2_Polybutadiene | 1,2-Polybutadiene<br>Transmission(Microscope) |

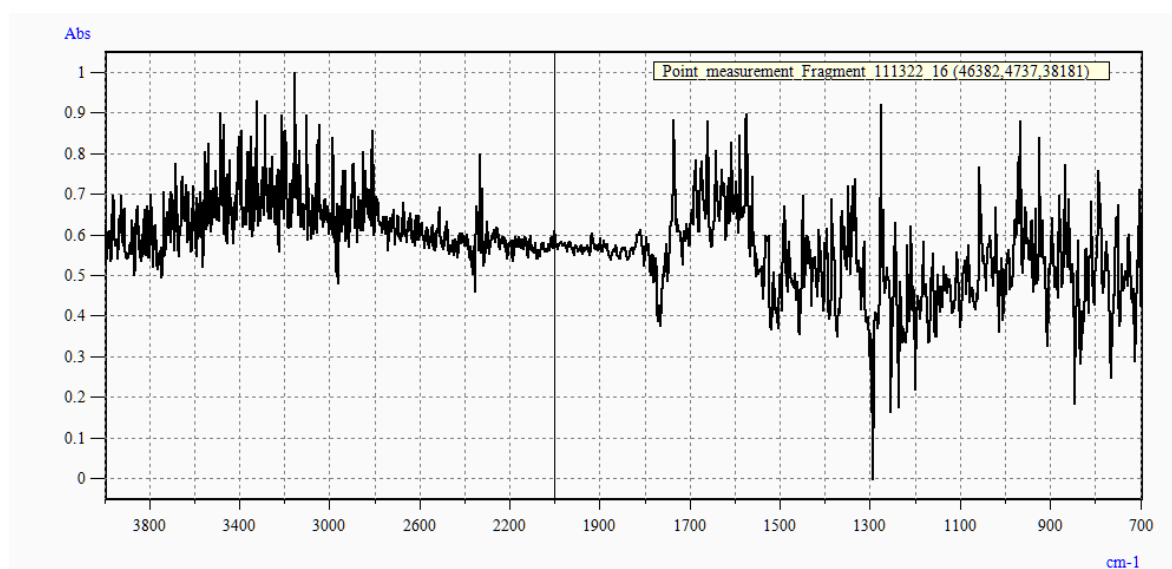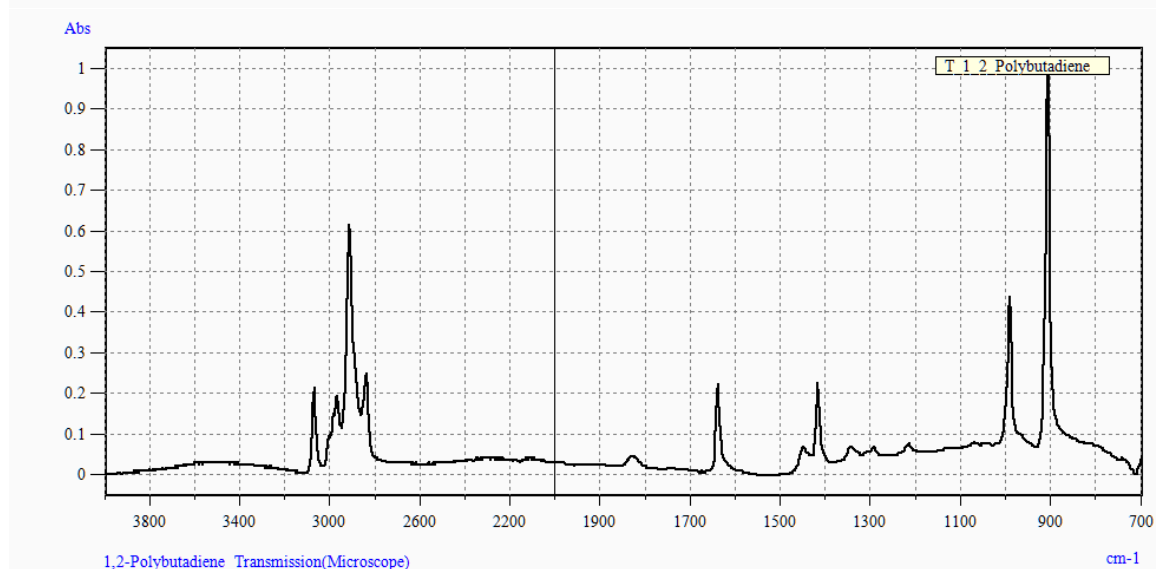

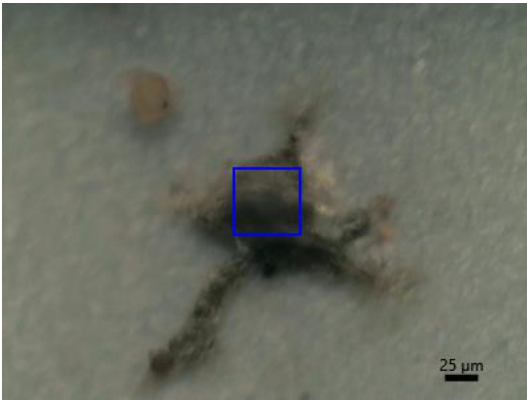

## Search Result Report

Filename : C:\Users\User\Desktop\UTSA  
 samples\UV042821HA31\Point\_measurement\_Fragment\_111322\_17.apit  
 Acquired Datetime : 2022/11/13 11:21:12

### ● Search Parameters

Library list :  
 IRs Polymer2  
 ATR-Polymer2  
 T-Polymer2  
 Maximum hits: 200  
 Minimum quality : 0  
 Algorithm : DiffDeriv

| Score | Library      | Name                       | Comment                                                              |
|-------|--------------|----------------------------|----------------------------------------------------------------------|
| 606   | ATR-Polymer2 | D_Polyisoprene_Chlorinated | Polyisoprene,<br>Chlorinated(Chlorine content<br>65%) DuraSamplIR-II |

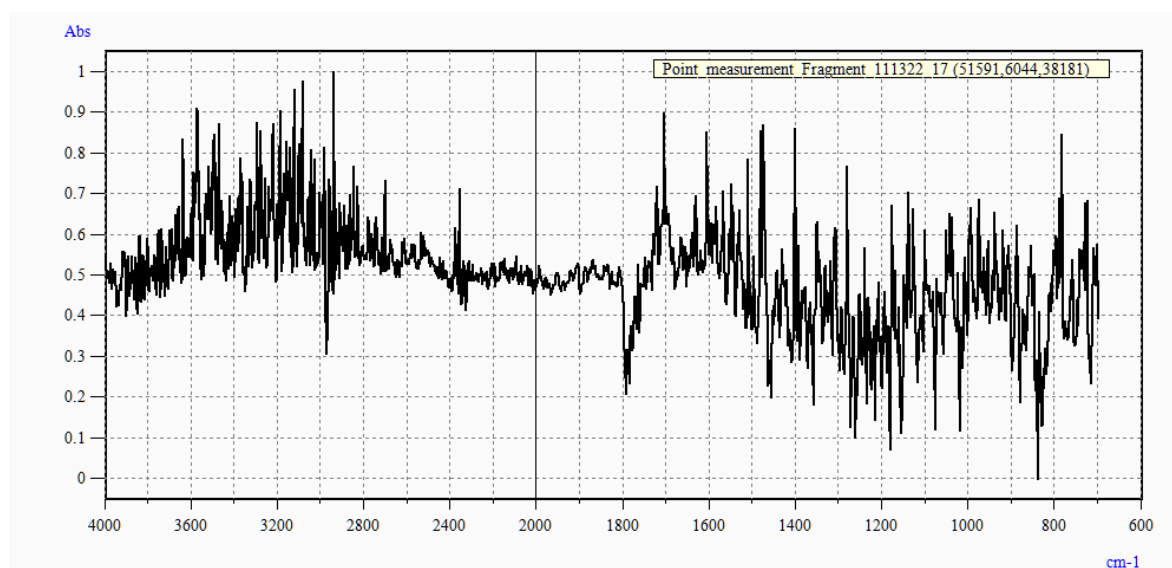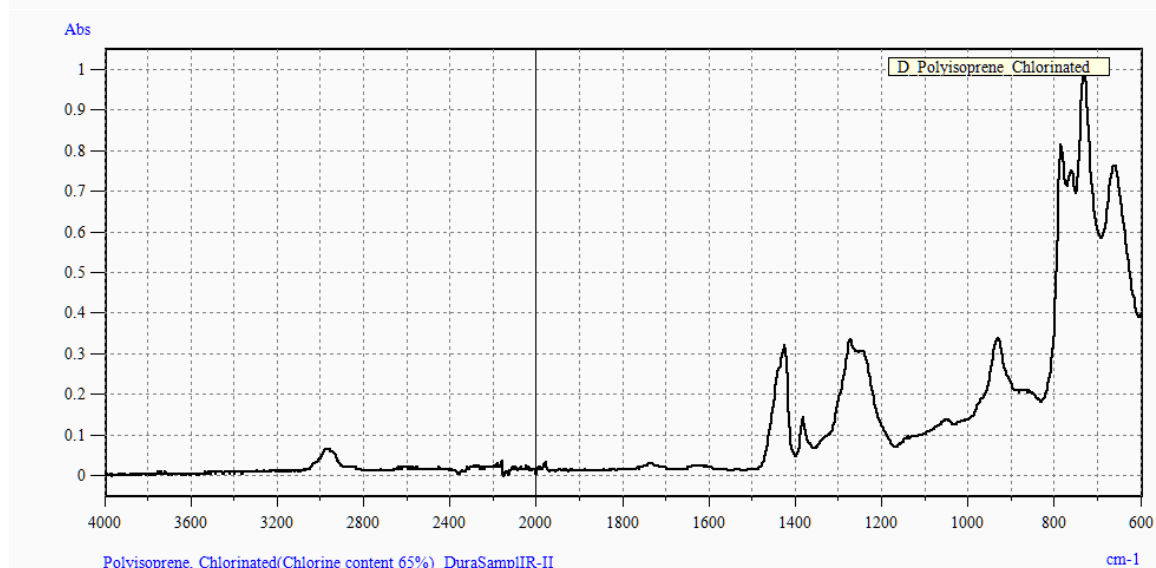

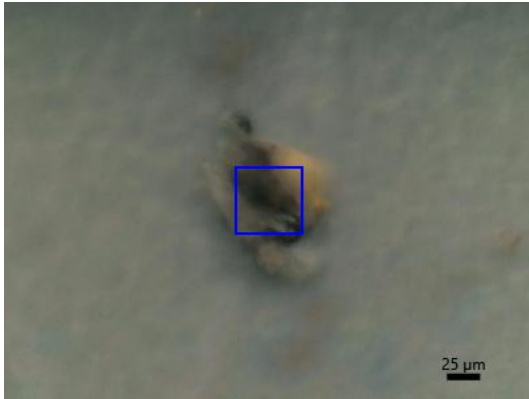

## Search Result Report

Filename : C:\Users\User\Desktop\UTSA  
 samples\UV042821HA31\Point\_measurement\_Fragment\_111322\_18.apit  
 Acquired Datetime : 2022/11/13 11:23:31

### ● Search Parameters

Library list :  
 IRs Polymer2  
 ATR-Polymer2  
 T-Polymer2  
 Maximum hits: 200  
 Minimum quality : 0  
 Algorithm : DiffDeriv

| Score | Library    | Name           | Comment                                   |
|-------|------------|----------------|-------------------------------------------|
| 602   | T-Polymer2 | T_PhenoxyResin | Phenoxy Resin<br>Transmission(Microscope) |

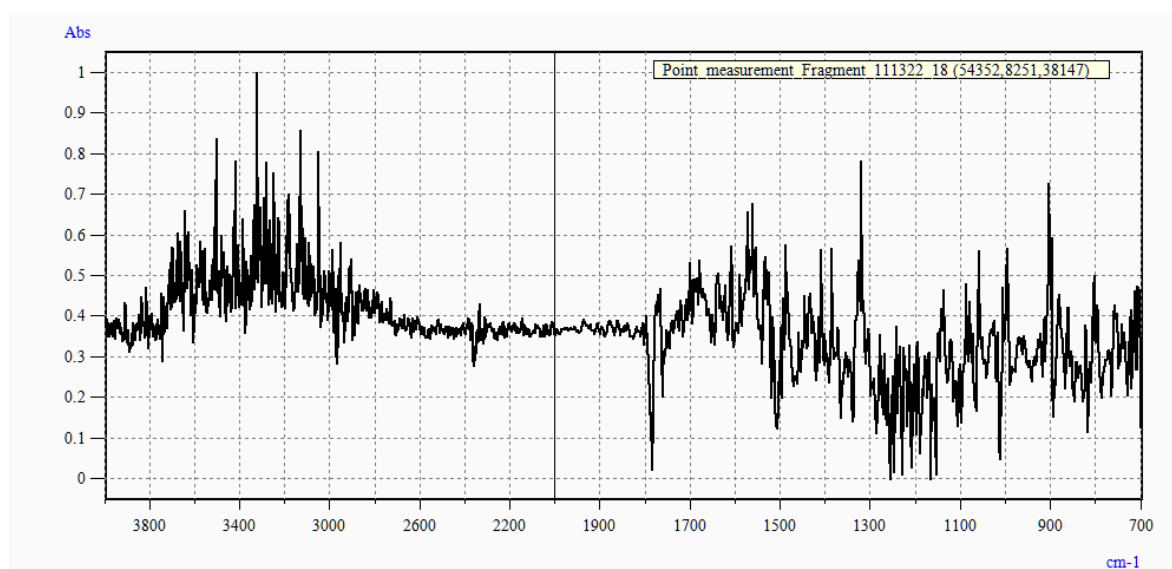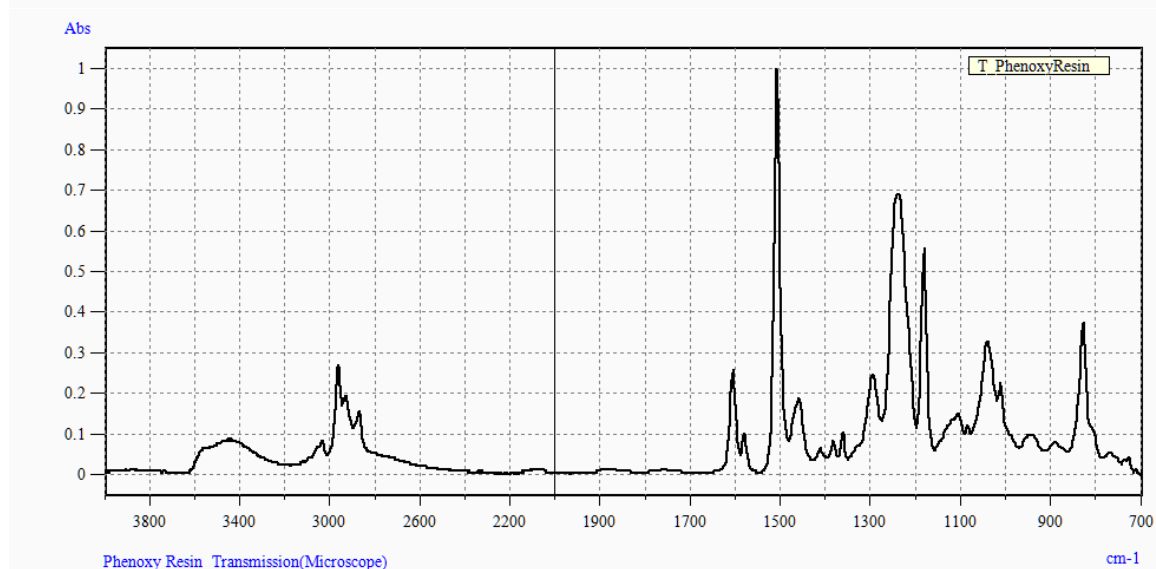

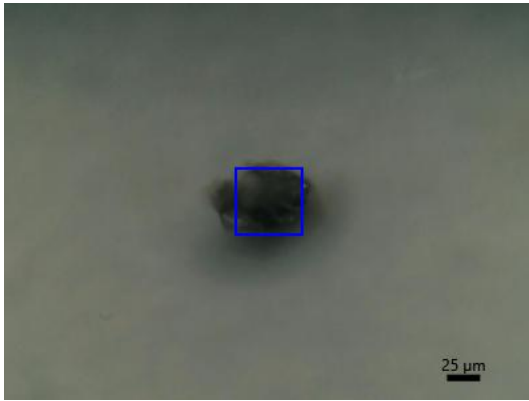

## Search Result Report

Filename : C:\Users\User\Desktop\UTSA samples\UV042821HA34\Point  
 Measurement\_Fragment\_111222\_62.apit  
 Acquired Datetime : 2022/11/12 17:10:43

### ● Search Parameters

Library list :  
 IRs Polymer2  
 ATR-Polymer2  
 T-Polymer2  
 Maximum hits: 200  
 Minimum quality : 0  
 Algorithm : DiffDeriv

| Score | Library      | Name        | Comment                                          |
|-------|--------------|-------------|--------------------------------------------------|
| 600   | ATR-Polymer2 | D_Additive3 | Polymer Additive(Irganox 1330)<br>DuraSamplIR-II |

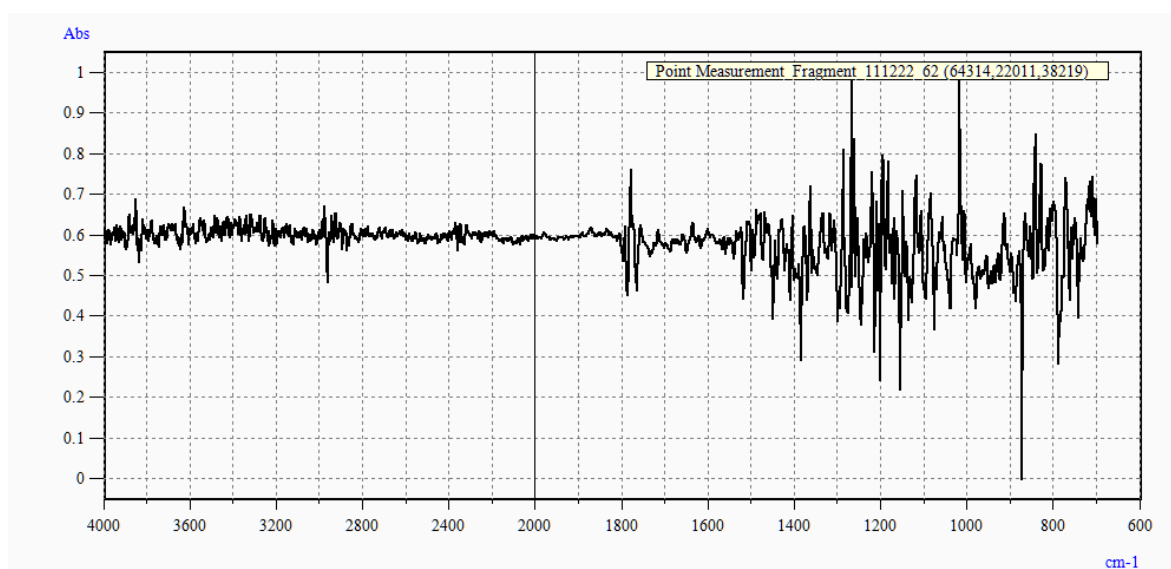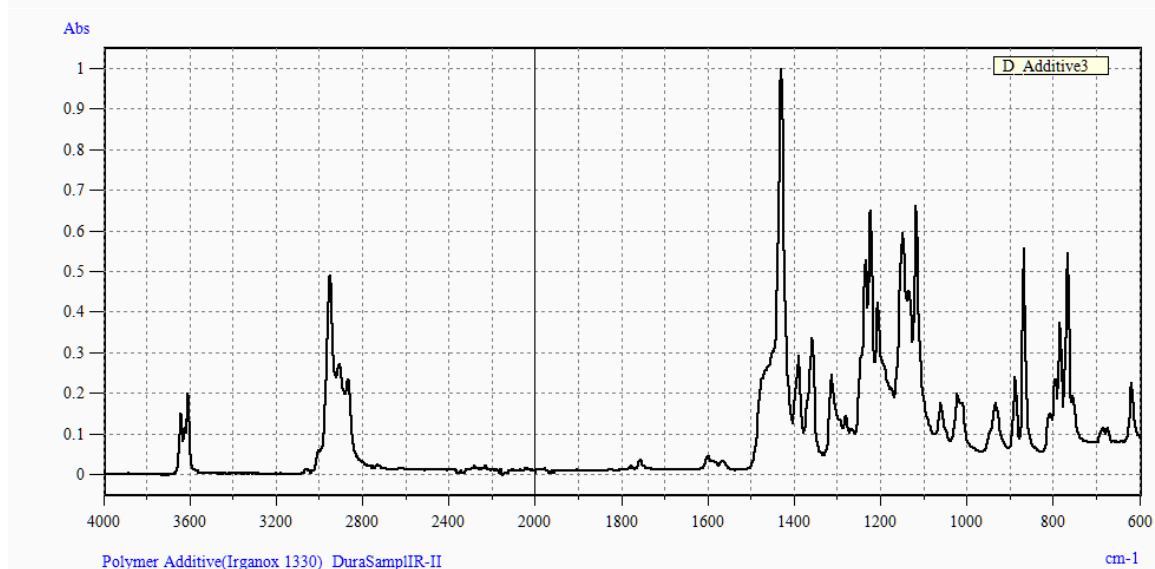

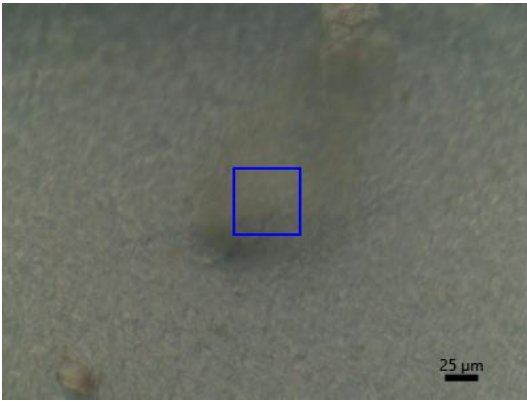

# Search Result Report

Filename : C:\Users\User\Desktop\UTSA samples\UV042821HA34\Point  
 Measurement\_Fragment\_111222\_63.apit  
 Acquired Datetime : 2022/11/12 17:16:19

● **Search Parameters**

Library list :  
 IRs Polymer2  
 ATR-Polymer2  
 T-Polymer2  
 Maximum hits: 200  
 Minimum quality : 0  
 Algorithm : DiffDeriv

| Score | Library      | Name     | Comment                    |
|-------|--------------|----------|----------------------------|
| 613   | ATR-Polymer2 | D_Epoxy7 | Epoxy Resin DuraSamplIR-II |

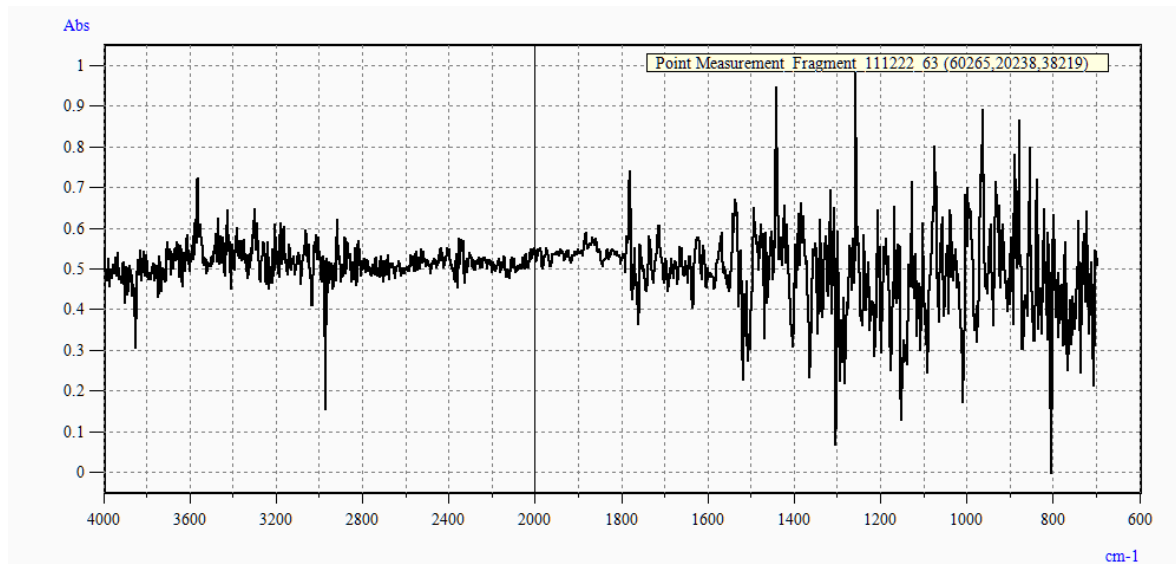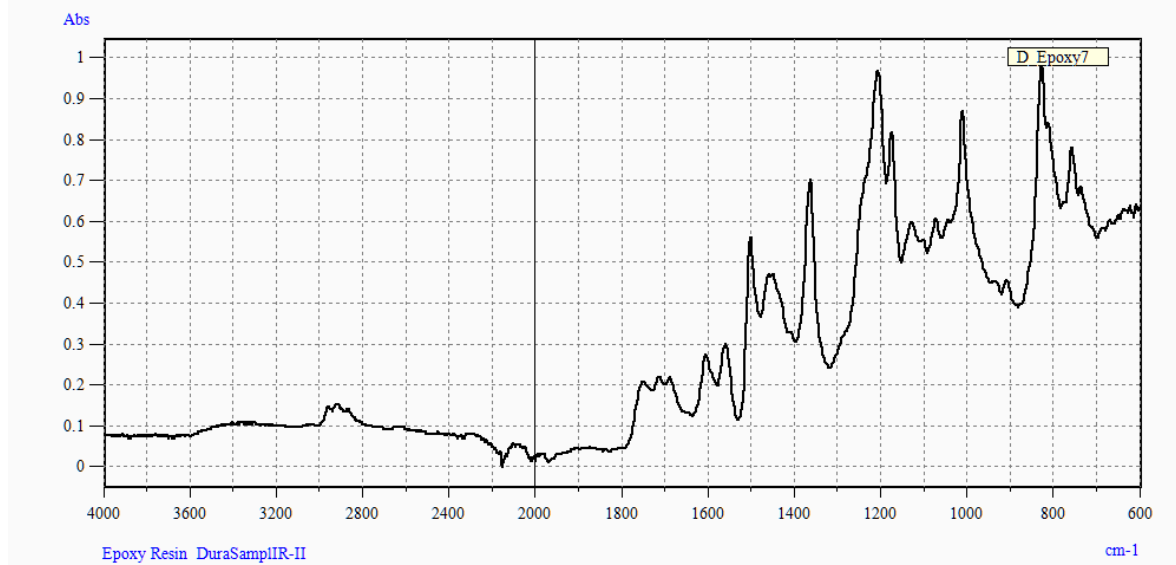

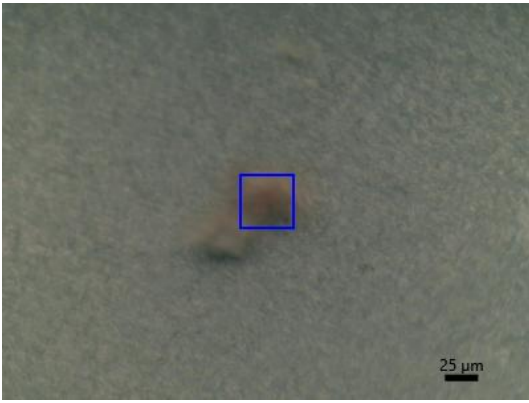

## Search Result Report

Filename : C:\Users\User\Desktop\UTSA samples\UV042821HA34\Point  
 Measurement\_Fragment\_111222\_64.apit  
 Acquired Datetime : 2022/11/12 17:19:07

### ● Search Parameters

Library list :  
 IRs Polymer2  
 ATR-Polymer2  
 T-Polymer2  
 Maximum hits: 200  
 Minimum quality : 0  
 Algorithm : DiffDeriv

| Score | Library      | Name        | Comment                                         |
|-------|--------------|-------------|-------------------------------------------------|
| 564   | ATR-Polymer2 | D_Additive6 | Polymer Additive(Sanol LS770)<br>DuraSamplIR-II |

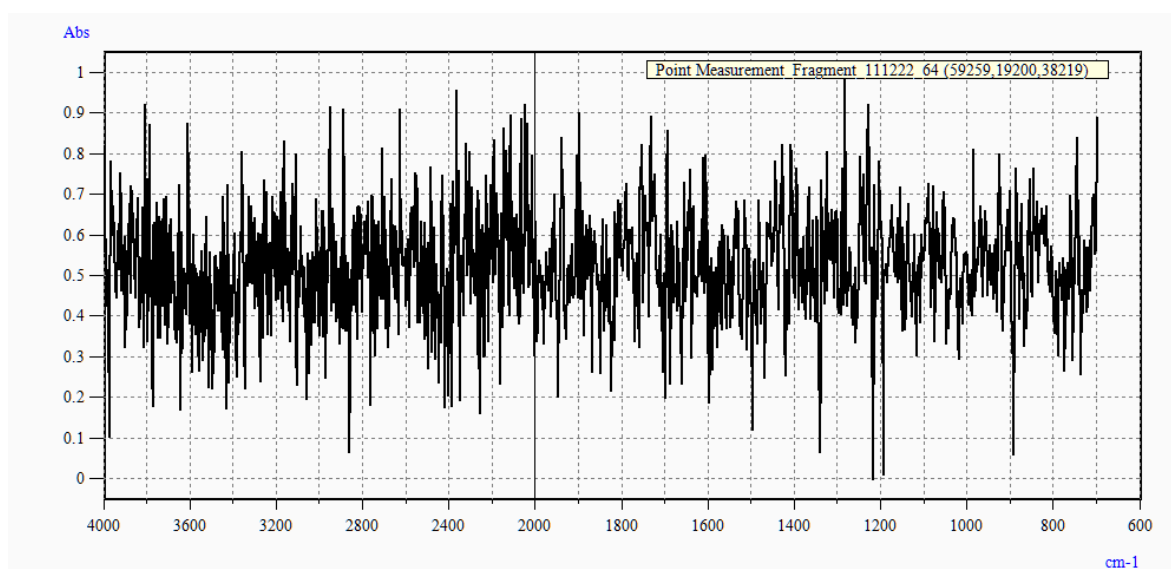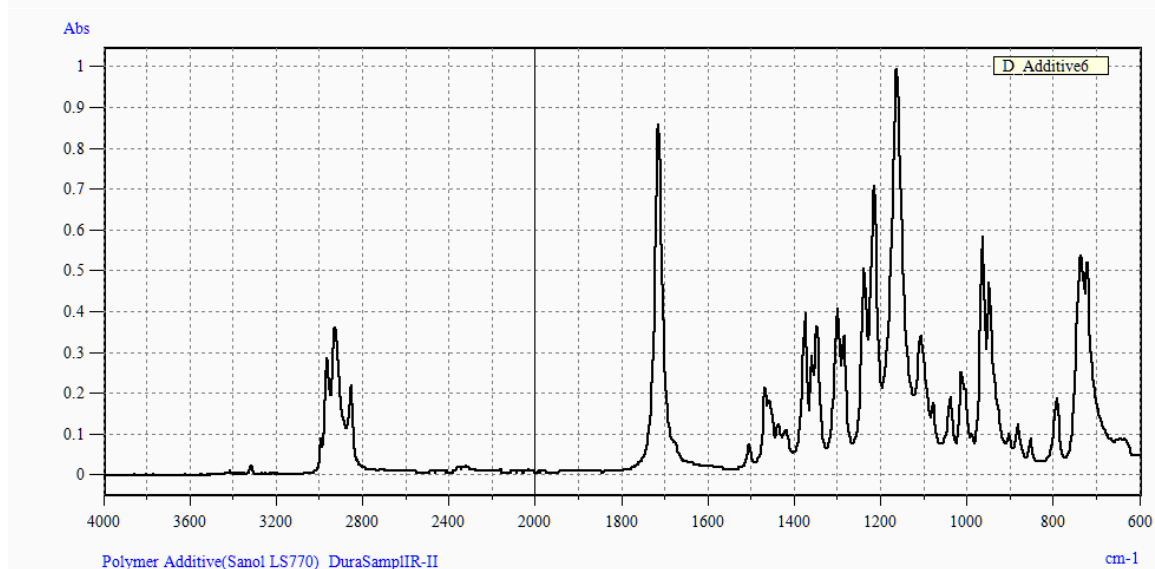

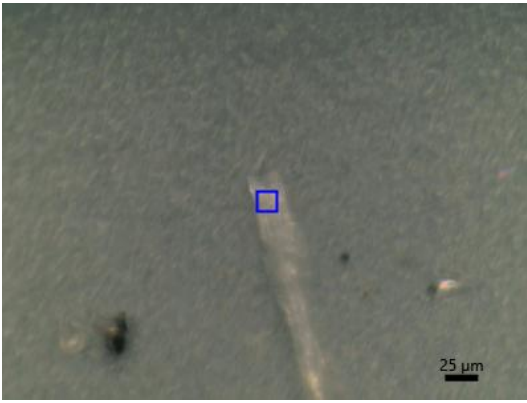

# Search Result Report

Filename : C:\Users\User\Desktop\UTSA samples\UV042821HA34\Point  
 Measurement\_Fragment\_111222\_65.apit  
 Acquired Datetime : 2022/11/12 17:22:20

● **Search Parameters**

Library list :  
 IRs Polymer2  
 ATR-Polymer2  
 T-Polymer2  
 Maximum hits: 200  
 Minimum quality : 0  
 Algorithm : DiffDeriv

| Score | Library      | Name   | Comment                                          |
|-------|--------------|--------|--------------------------------------------------|
| 597   | ATR-Polymer2 | D_POM2 | Polyacetal(Electronic Parts-2)<br>DuraSamplIR-II |

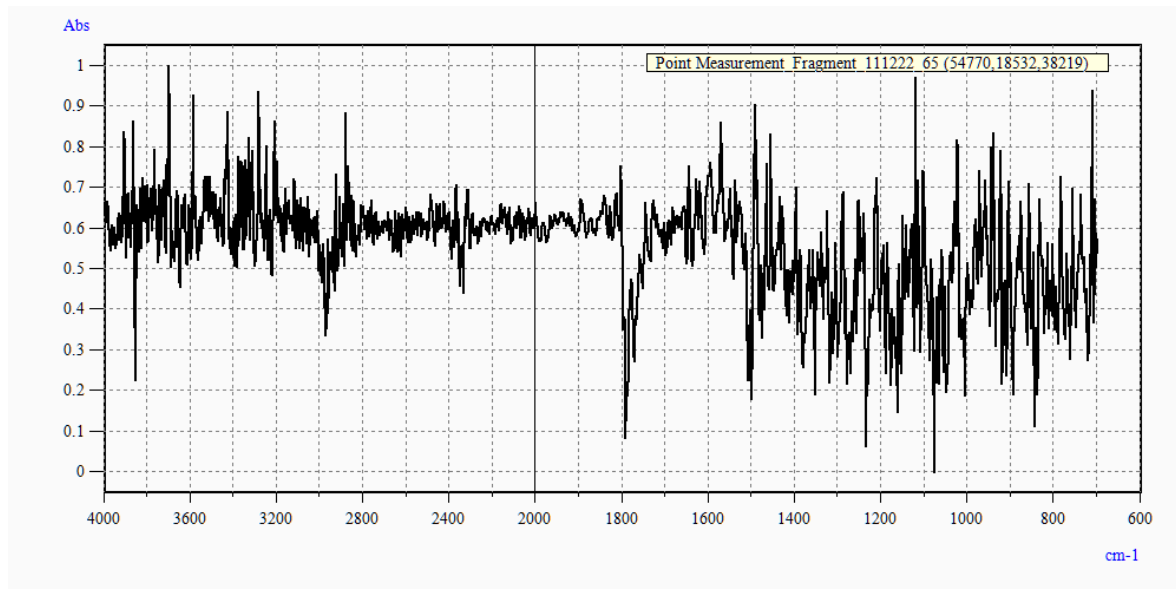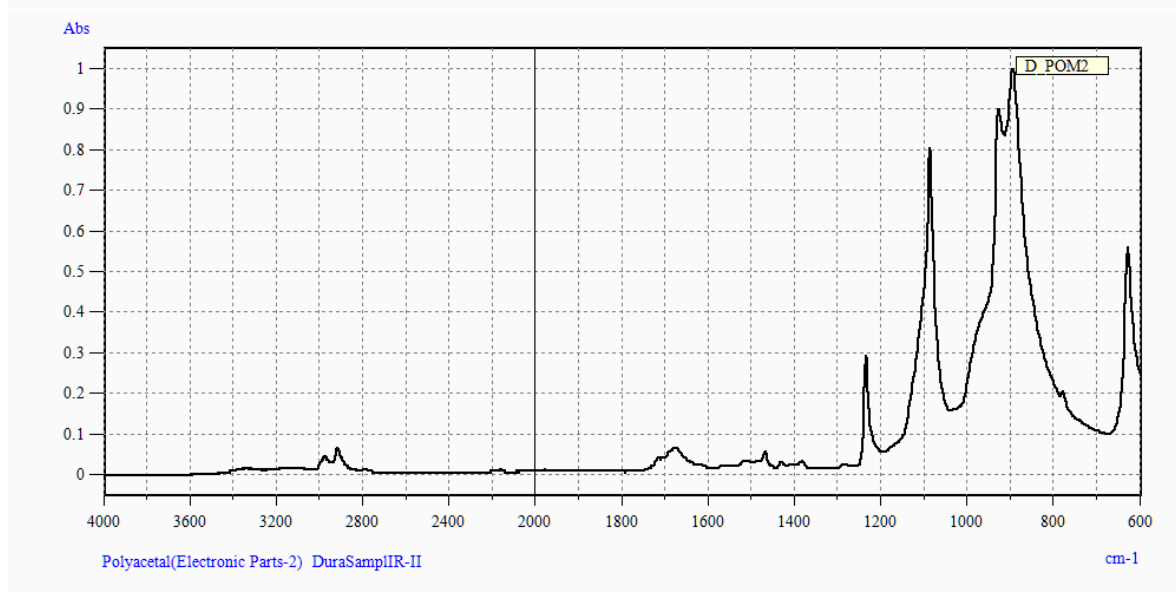

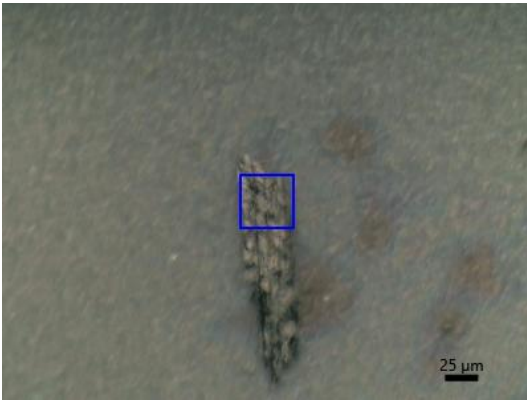

## Search Result Report

Filename : C:\Users\User\Desktop\UTSA samples\UV042821HA34\Point  
 Measurement\_Fragment\_111222\_66.apit  
 Acquired Datetime : 2022/11/12 17:30:01

### ● Search Parameters

Library list :  
 IRs Polymer2  
 ATR-Polymer2  
 T-Polymer2  
 Maximum hits: 200  
 Minimum quality : 0  
 Algorithm : DiffDeriv

| Score | Library      | Name | Comment                          |
|-------|--------------|------|----------------------------------|
| 694   | ATR-Polymer2 | D_PC | Polycarbonate(PC) DuraSamplIR-II |

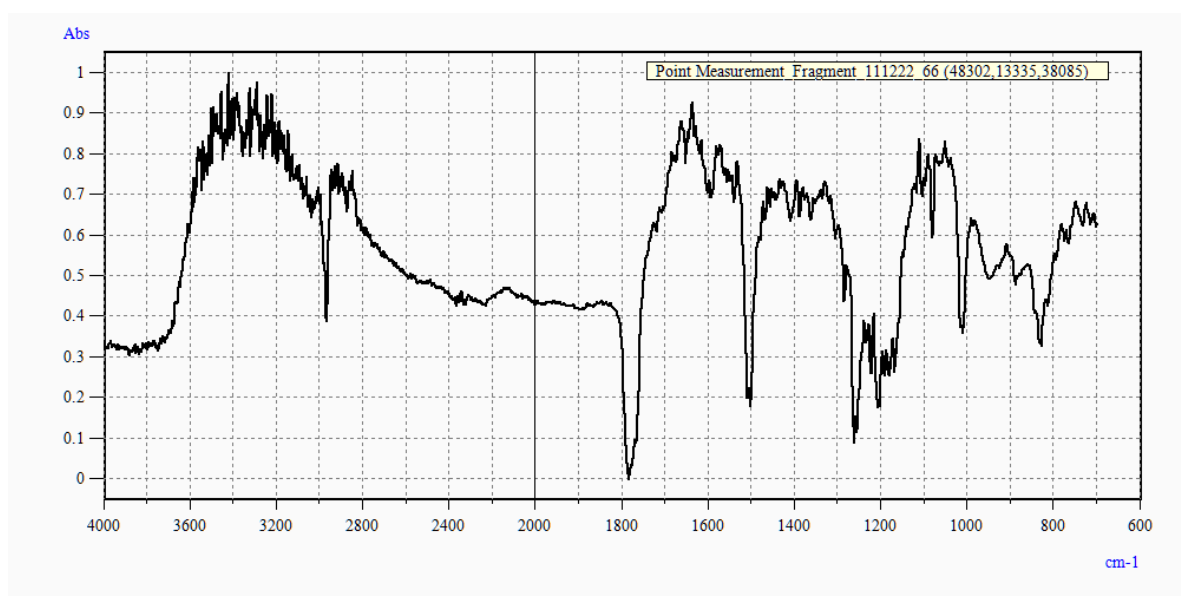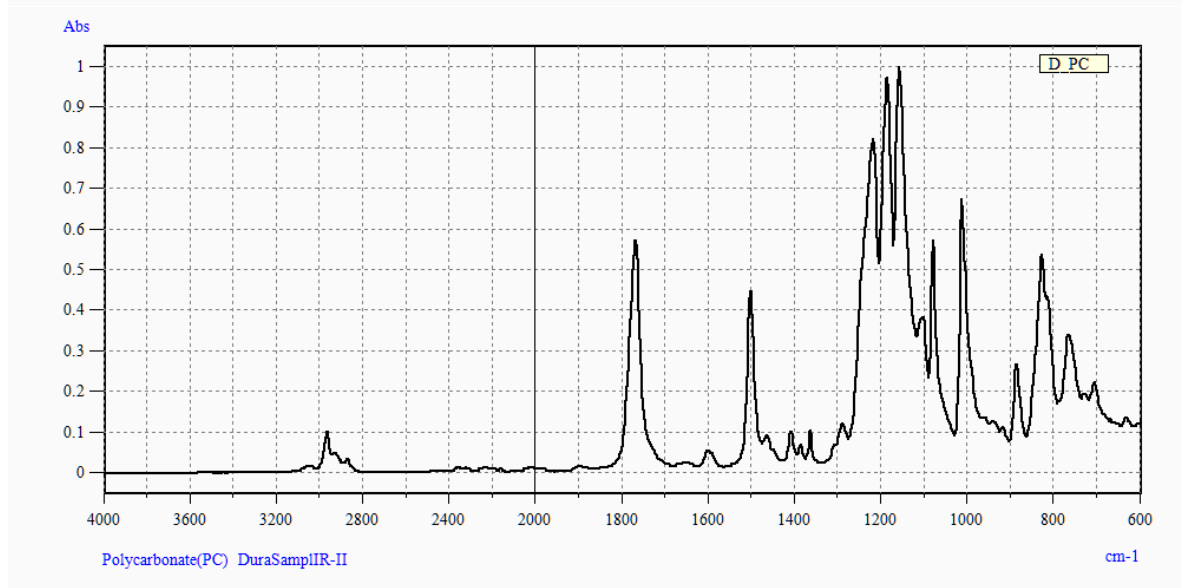

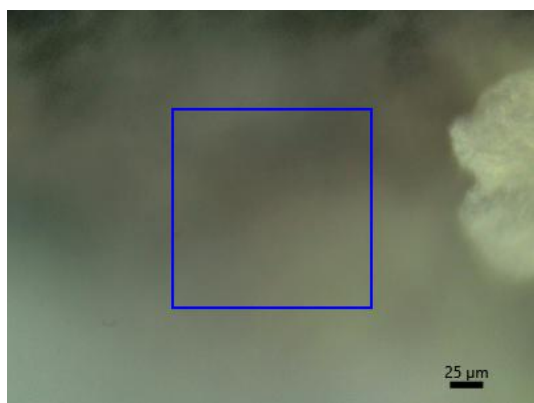

## Search Result Report

Filename : C:\Users\User\Desktop\UTSA samples\UV042821HA34\Point  
 Measurement\_Fragment\_111222\_67.apit  
 Acquired Datetime : 2022/11/12 17:33:32

### ● Search Parameters

Library list :  
 IRs Polymer2  
 ATR-Polymer2  
 T-Polymer2  
 Maximum hits: 200  
 Minimum quality : 0  
 Algorithm : DiffDeriv

| Score | Library      | Name | Comment |
|-------|--------------|------|---------|
| 608   | IRs Polymer2 | SBS  | SBSFilm |

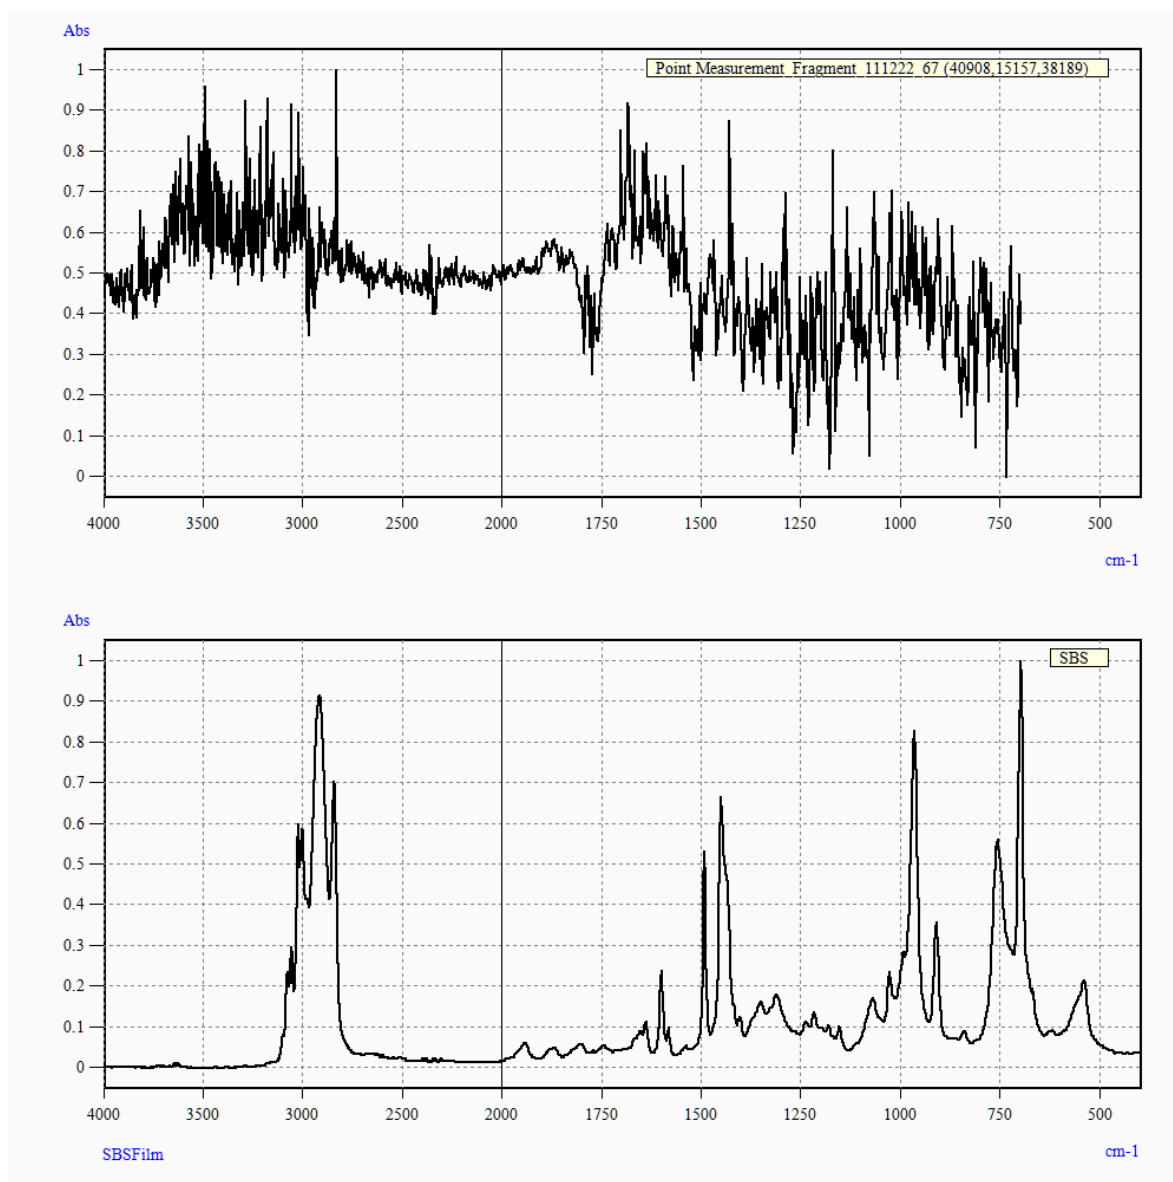

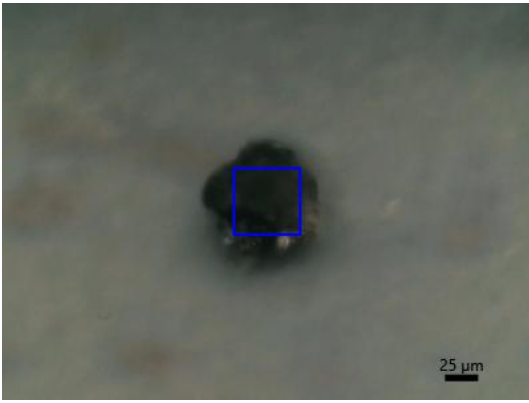

# Search Result Report

Filename : C:\Users\User\Desktop\UTSA samples\UV042821HA34\Point  
 Measurement\_Fragment\_111222\_68.apit  
 Acquired Datetime : 2022/11/12 17:43:31

● **Search Parameters**

Library list :  
 IRs Polymer2  
 ATR-Polymer2  
 T-Polymer2  
 Maximum hits: 200  
 Minimum quality : 0  
 Algorithm : DiffDeriv

| Score | Library    | Name           | Comment                                    |
|-------|------------|----------------|--------------------------------------------|
| 572   | T-Polymer2 | Silicon Grease | Silicon Grease<br>Transmission(Microscope) |

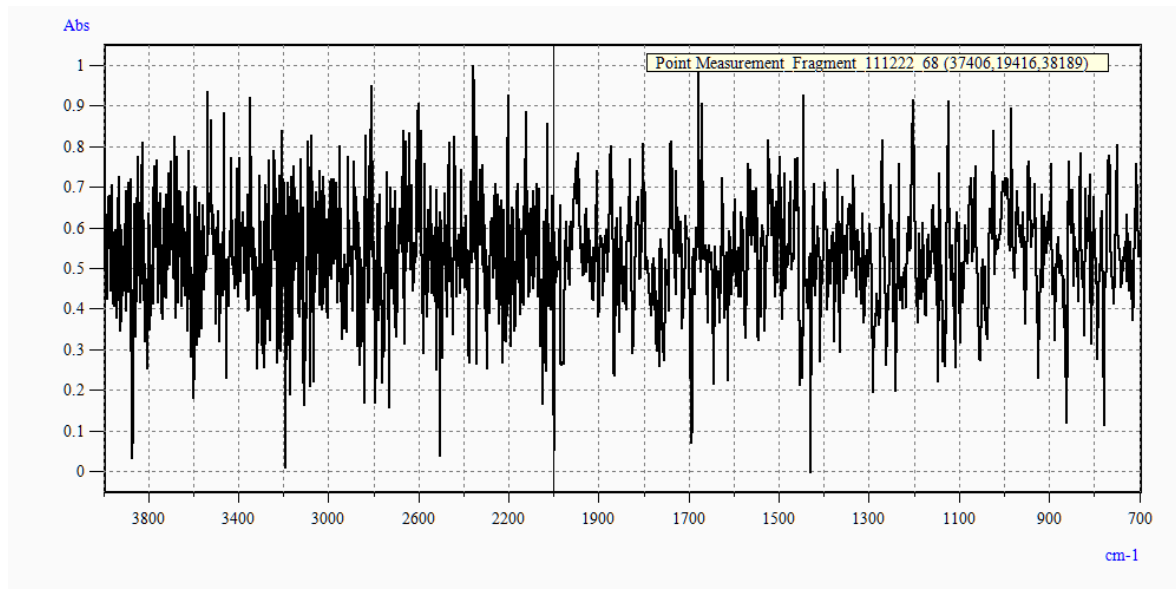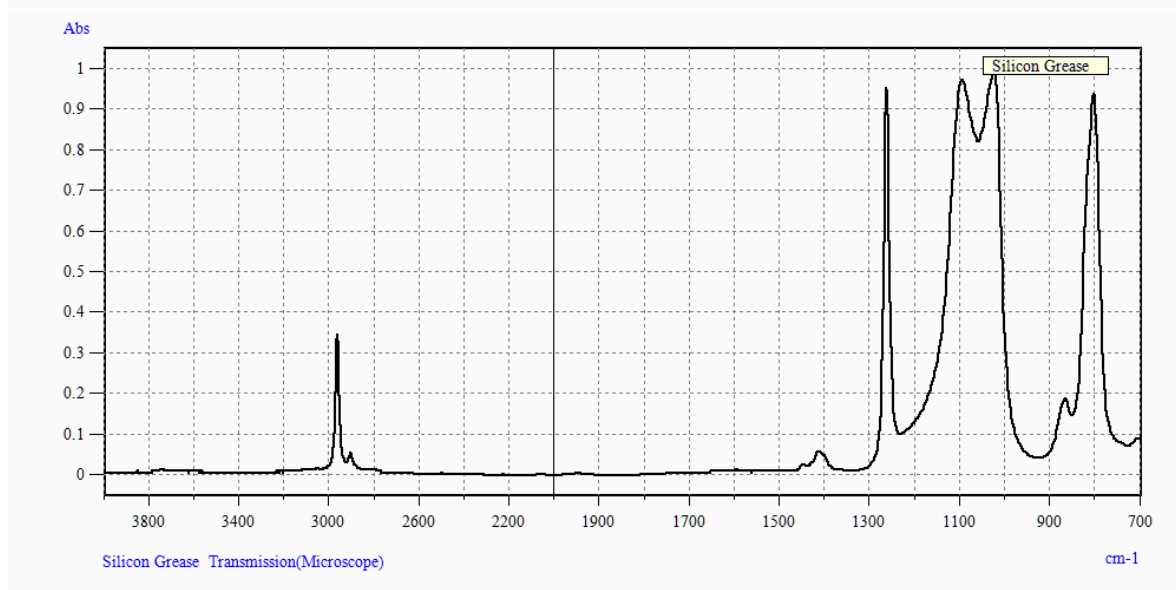

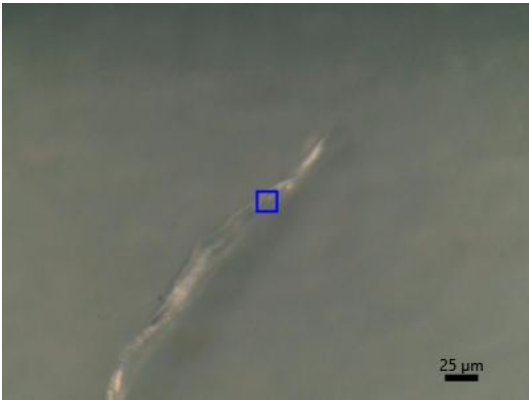

## Search Result Report

Filename : C:\Users\User\Desktop\UTSA samples\UV042821HA34\Point  
 Measurement\_Fragment\_111222\_69.apit  
 Acquired Datetime : 2022/11/12 17:52:03

● **Search Parameters**

Library list :  
 IRs Polymer2  
 ATR-Polymer2  
 T-Polymer2  
 Maximum hits: 200  
 Minimum quality : 0  
 Algorithm : DiffDeriv

| Score | Library      | Name    | Comment                                                                                                           |
|-------|--------------|---------|-------------------------------------------------------------------------------------------------------------------|
| 592   | IRs Polymer2 | PETG-20 | POLYETHYLENE<br>GLYCOLORIGIN Date: 92/04/09<br>File: PETG-20.DXINFRARED<br>SPECTROPHOTOMETER FTIR-<br>8000 SERIES |

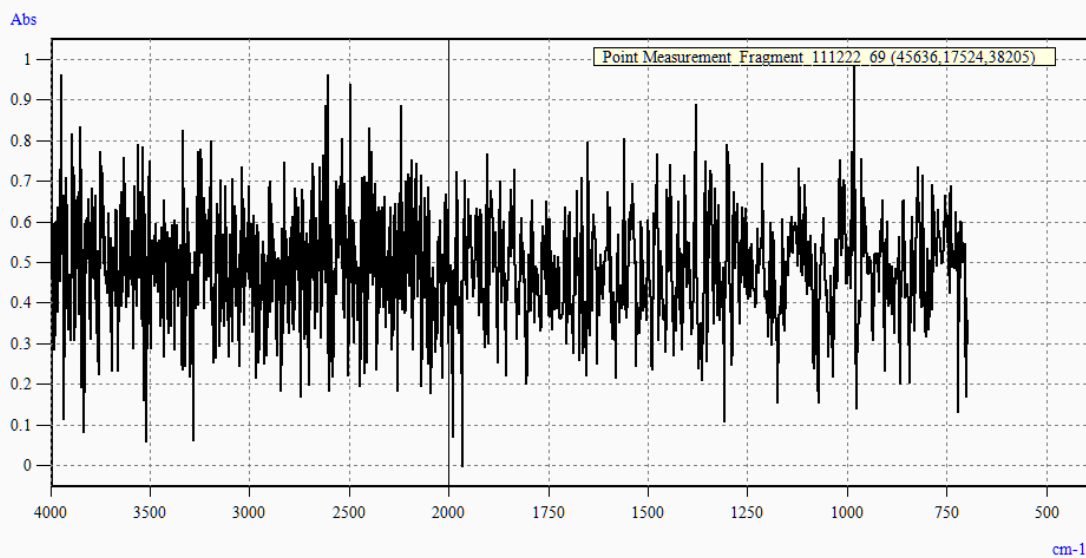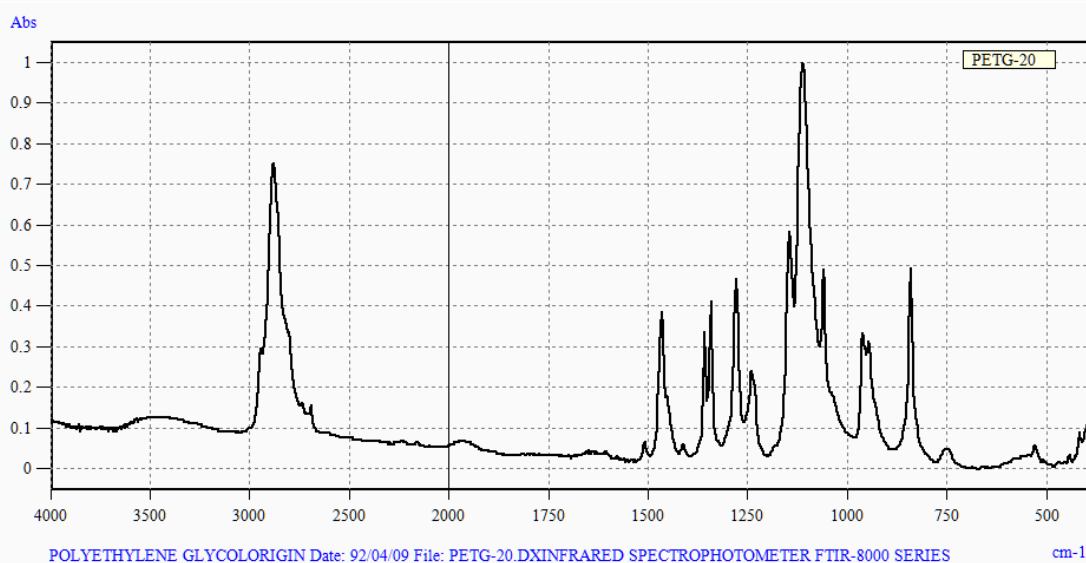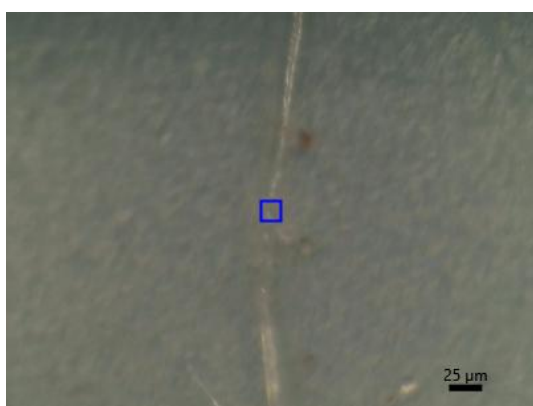

# Search Result Report

Filename : C:\Users\User\Desktop\UTSA samples\UV042821HA34\Point  
 Measurement\_Fragment\_111222\_70.apit  
 Acquired Datetime : 2022/11/12 17:57:24

● **Search Parameters**

Library list :  
 IRs Polymer2  
 ATR-Polymer2  
 T-Polymer2  
 Maximum hits: 200  
 Minimum quality : 0  
 Algorithm : DiffDeriv

| Score | Library    | Name  | Comment                                                     |
|-------|------------|-------|-------------------------------------------------------------|
| 591   | T-Polymer2 | Epoxy | Epoxy Resin(Electronic Parts-2)<br>Transmission(Microscope) |

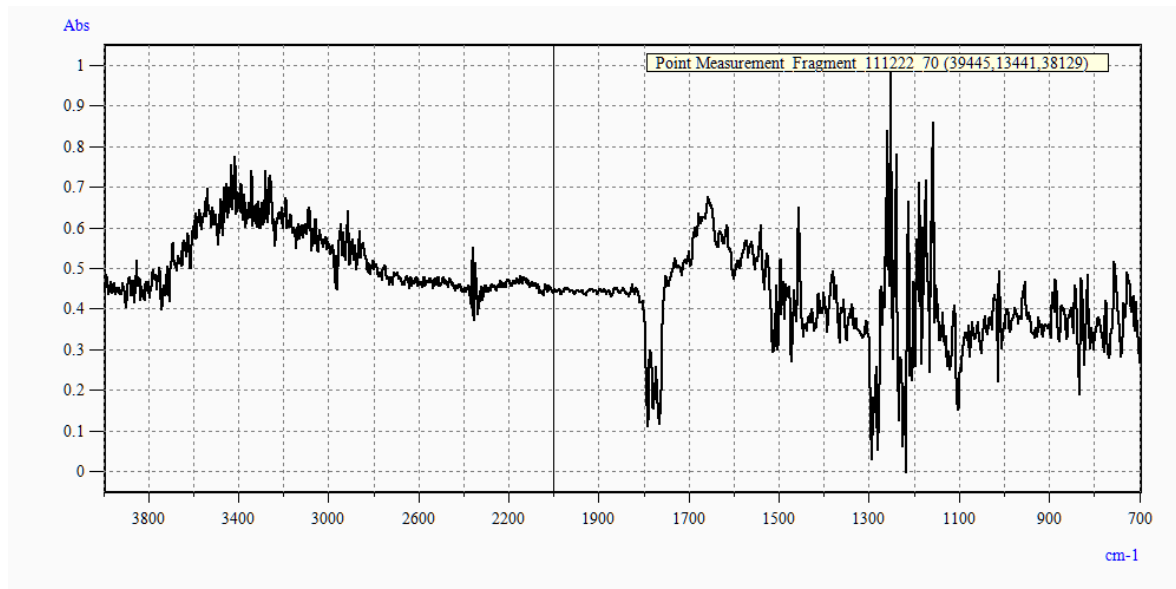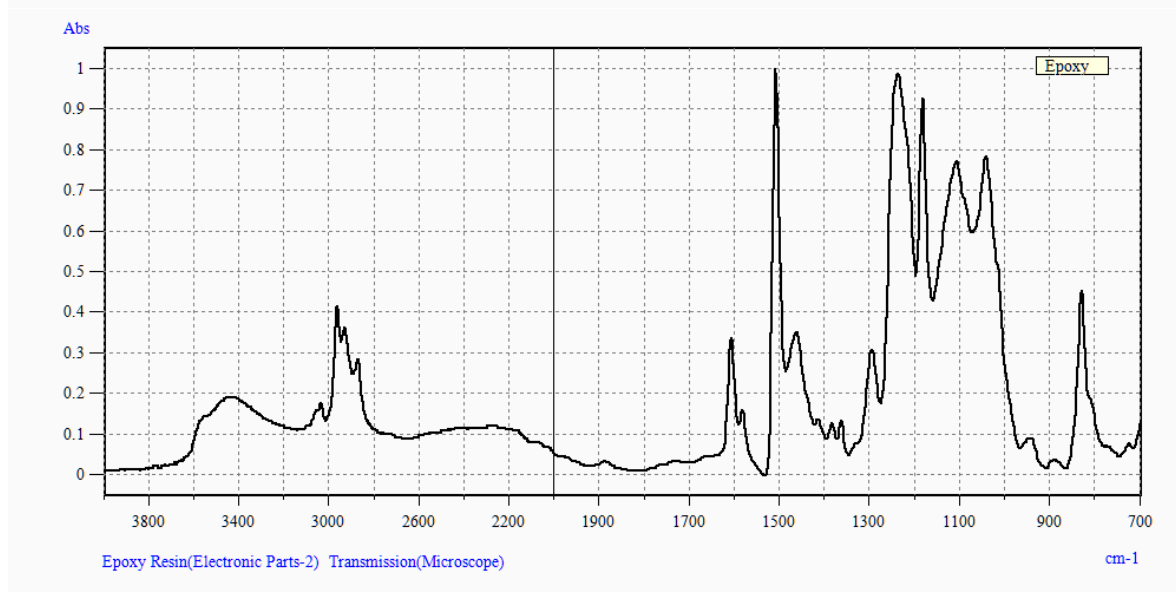

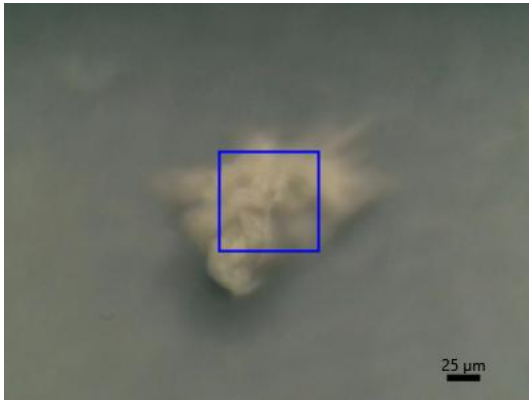

## Search Result Report

Filename : C:\Users\User\Desktop\UTSA samples\UV042821HA34\Point  
 Measurement\_Fragment\_111222\_71.apit  
 Acquired Datetime : 2022/11/12 18:02:12

### ● Search Parameters

Library list :  
 IRs Polymer2  
 ATR-Polymer2  
 T-Polymer2  
 Maximum hits: 200  
 Minimum quality : 0  
 Algorithm : DiffDeriv

| Score | Library      | Name  | Comment                                            |
|-------|--------------|-------|----------------------------------------------------|
| 587   | ATR-Polymer2 | D_IIR | IIR(Isobutylene-Isoprene Rubber)<br>DuraSamplIR-II |

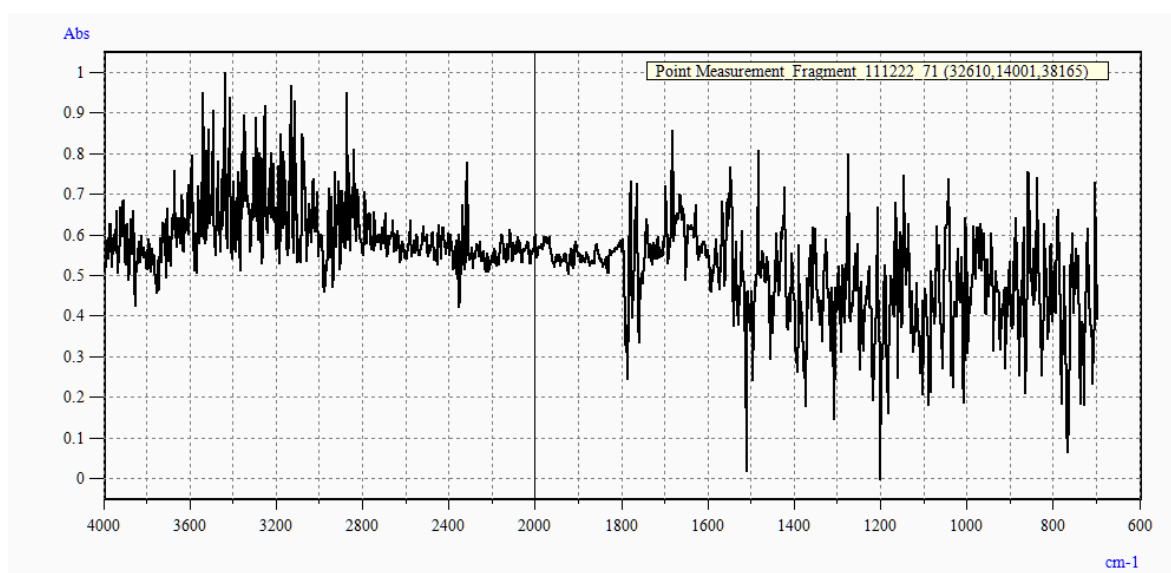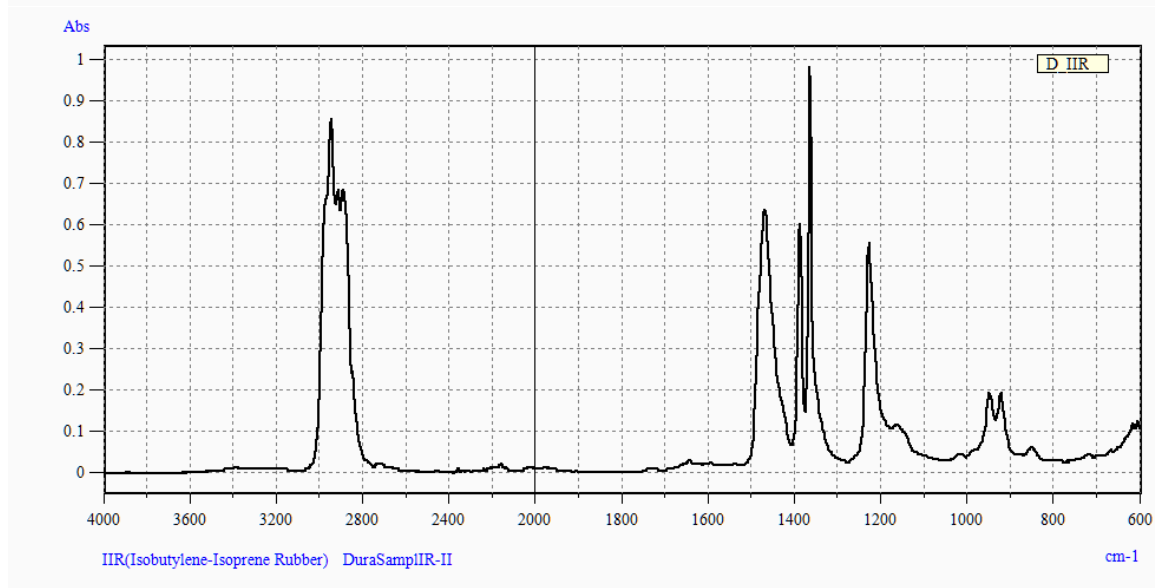

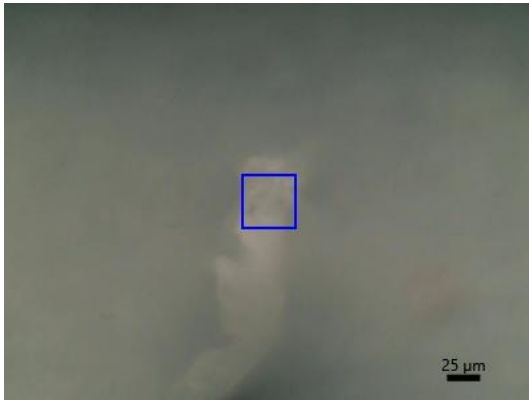

## Search Result Report

Filename : C:\Users\User\Desktop\UTSA samples\UV042821HA34\Point  
 Measurement\_Fragment\_111222\_72.apit  
 Acquired Datetime : 2022/11/12 18:05:02

### ● Search Parameters

Library list :  
 IRs Polymer2  
 ATR-Polymer2  
 T-Polymer2  
 Maximum hits: 200  
 Minimum quality : 0  
 Algorithm : DiffDeriv

| Score | Library      | Name          | Comment                    |
|-------|--------------|---------------|----------------------------|
| 586   | ATR-Polymer2 | D_Polysulfone | Polysulfone DuraSamplIR-II |

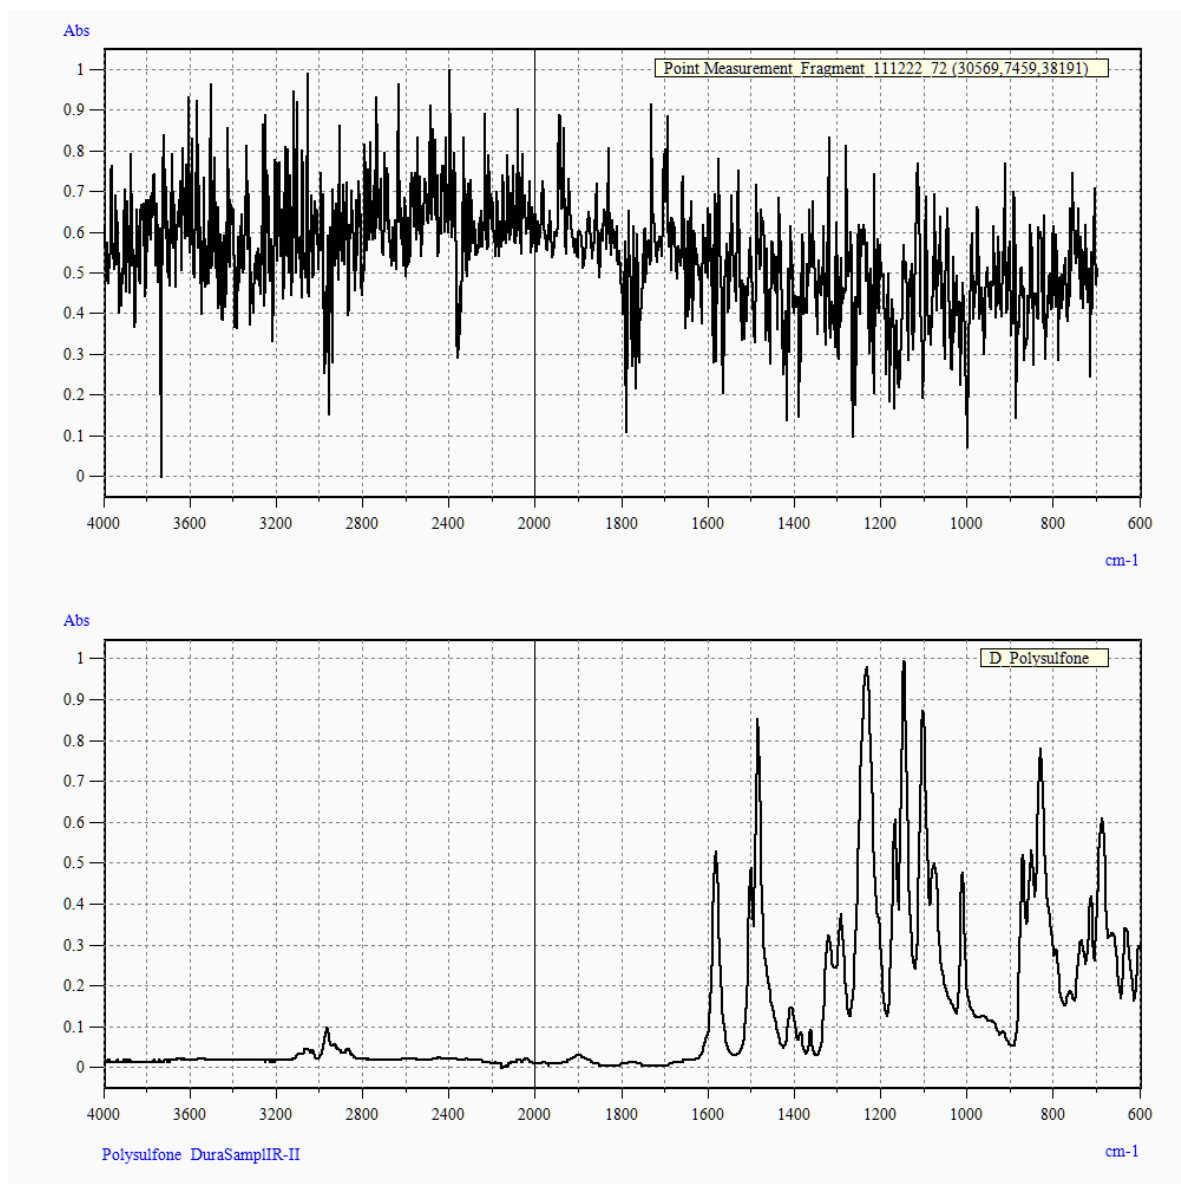

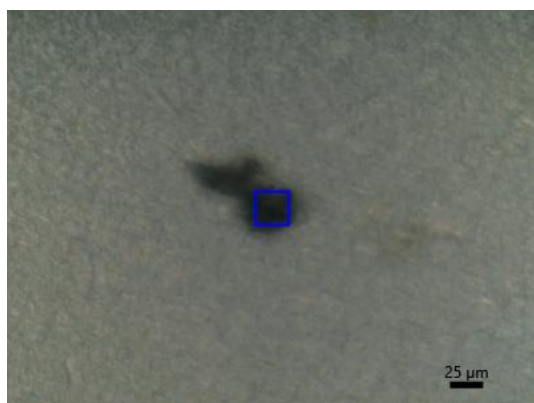

## Search Result Report

Filename : C:\Users\User\Desktop\UTSA samples\UV042821HA34\Point  
 Measurement\_Fragment\_111222\_73.apit  
 Acquired Datetime : 2022/11/12 18:09:50

### ● Search Parameters

Library list :  
 IRs Polymer2  
 ATR-Polymer2  
 T-Polymer2  
 Maximum hits: 200  
 Minimum quality : 0  
 Algorithm : DiffDeriv

| Score | Library      | Name       | Comment                                            |
|-------|--------------|------------|----------------------------------------------------|
| 606   | ATR-Polymer2 | D_IR-trans | trans-Polyisoprene Rubber(IR-trans) DuraSamplIR-II |

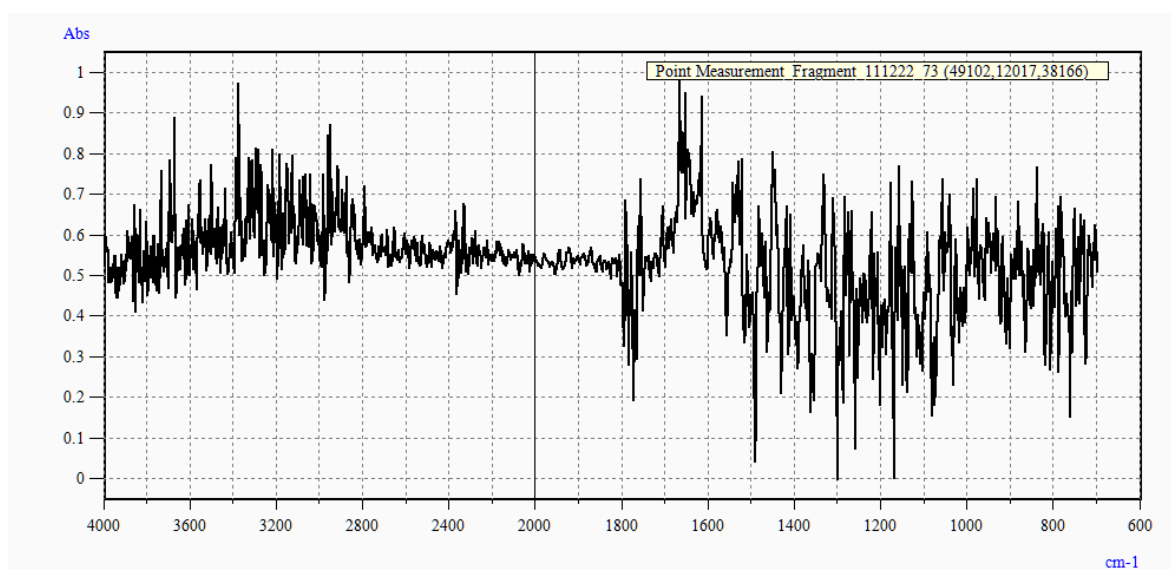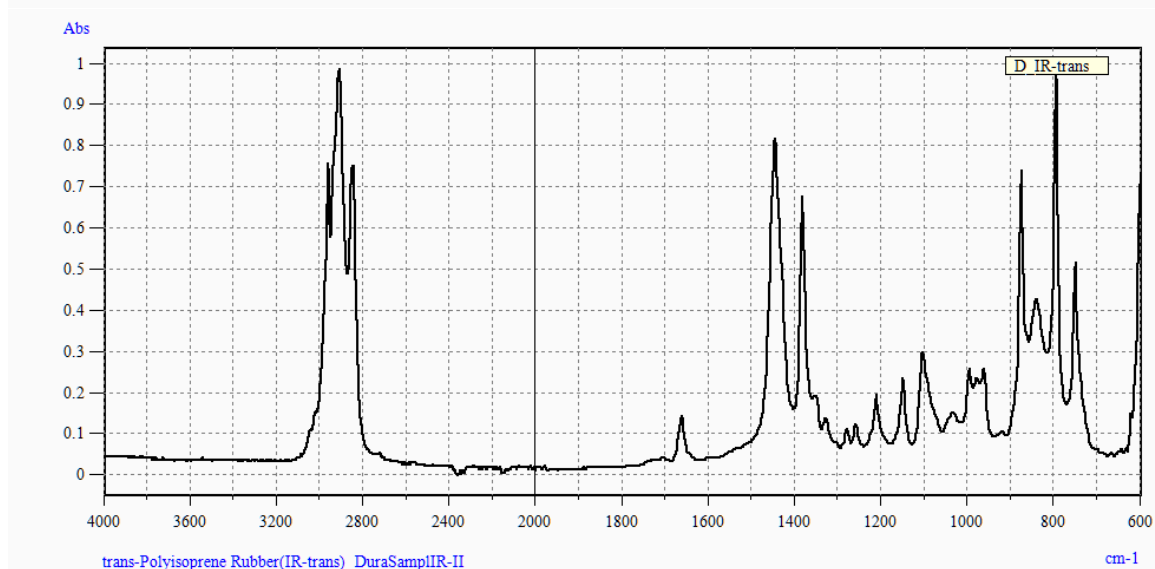

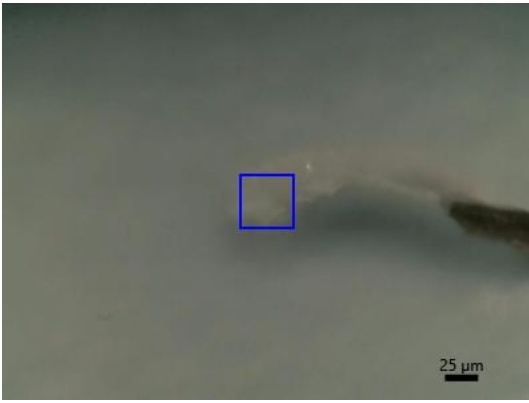

## Search Result Report

Filename : C:\Users\User\Desktop\UTSA samples\UV042821HA34\Point  
 Measurement\_Fragment\_111222\_74.apit  
 Acquired Datetime : 2022/11/12 18:12:38

● **Search Parameters**

Library list :  
 IRs Polymer2  
 ATR-Polymer2  
 T-Polymer2  
 Maximum hits: 200  
 Minimum quality : 0  
 Algorithm : DiffDeriv

| Score | Library      | Name | Comment                                                                                                            |
|-------|--------------|------|--------------------------------------------------------------------------------------------------------------------|
| 581   | IRs Polymer2 | PETG | Polyethylene glycol<br>ORIGIN Date:<br>92/03/27 File:<br>PETG.DXINFRARED<br>SPECTROPHOTOMETER FTIR-<br>8000 SERIES |

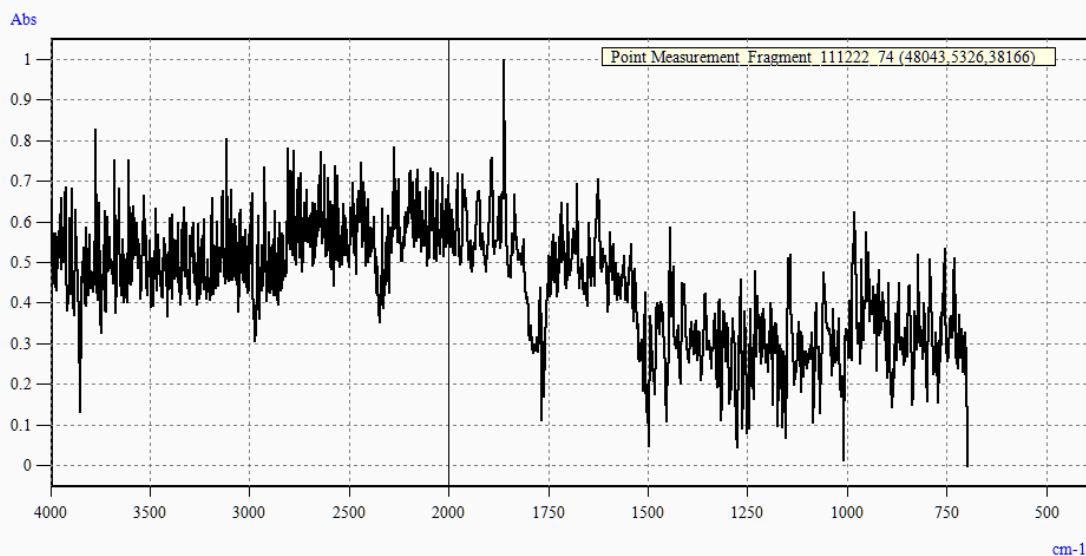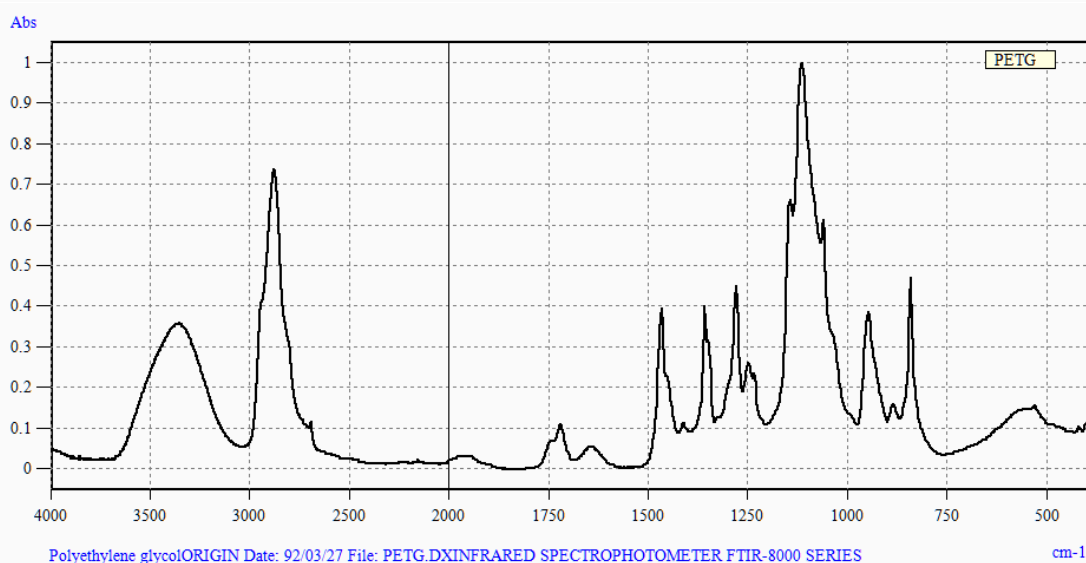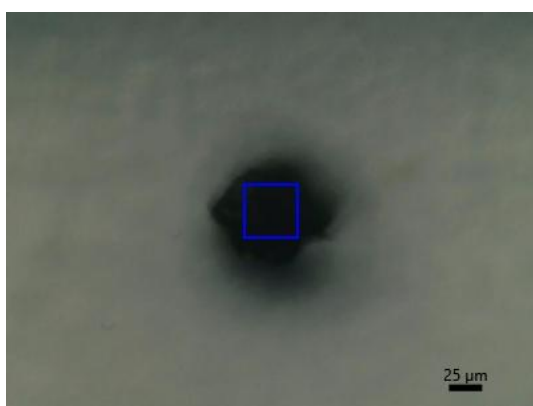

## Search Result Report

Filename : C:\Users\User\Desktop\UTSA samples\UV042821HA34\Point  
 Measurement\_Fragment\_111222\_75.apit  
 Acquired Datetime : 2022/11/12 18:16:28

### ● Search Parameters

Library list :  
 IRs Polymer2  
 ATR-Polymer2  
 T-Polymer2  
 Maximum hits: 200  
 Minimum quality : 0  
 Algorithm : DiffDeriv

| Score | Library    | Name    | Comment                                                                                         |
|-------|------------|---------|-------------------------------------------------------------------------------------------------|
| 590   | T-Polymer2 | T_EVA-6 | Ethylene/Vinyl Acetate(EVA)<br>Copolymer(Vinyl Acetate content<br>40%) Transmission(Microscope) |

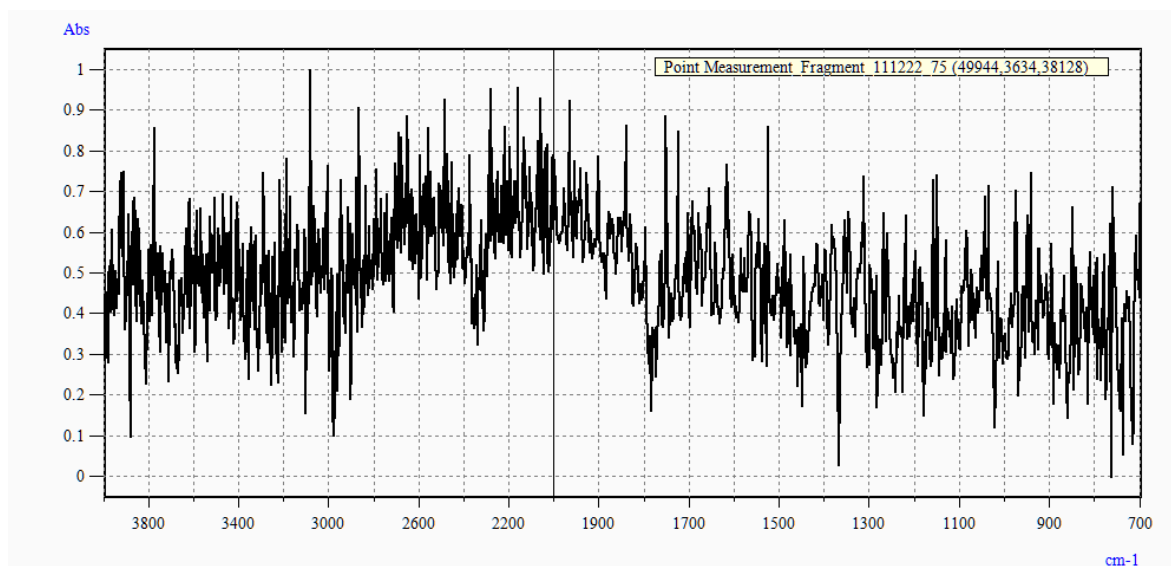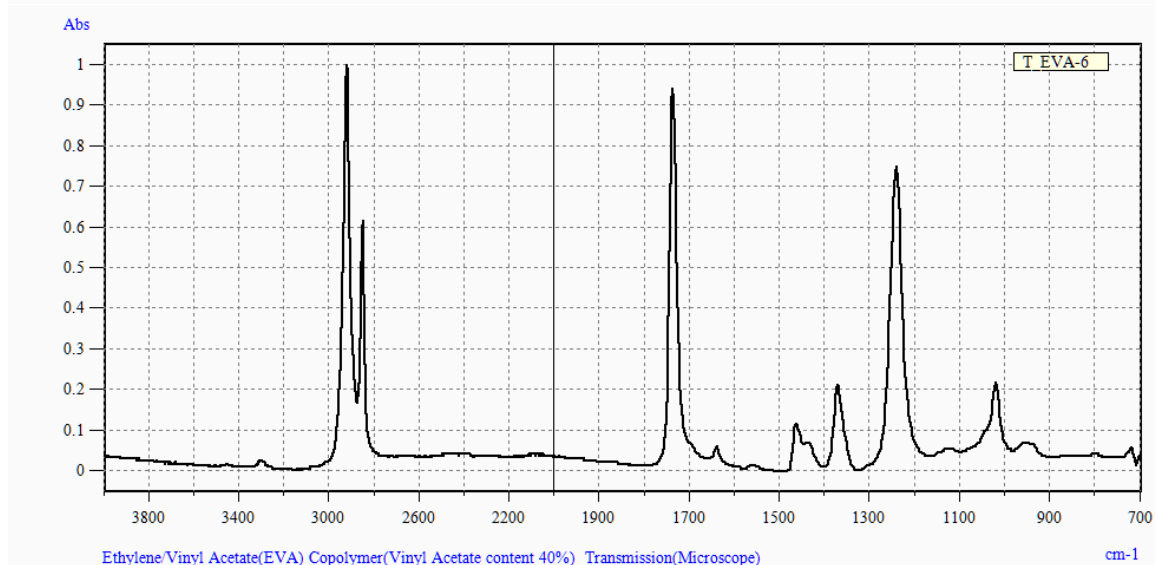

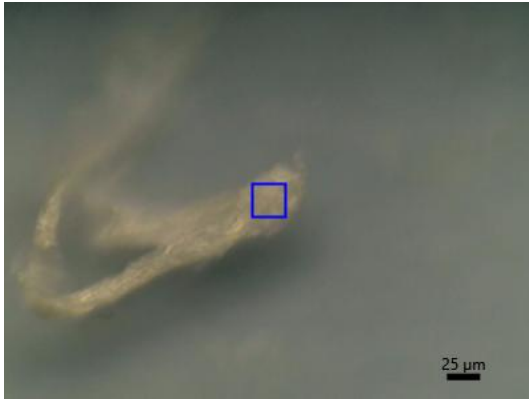

## Search Result Report

Filename : C:\Users\User\Desktop\UTSA samples\UV042821HA34\Point  
 Measurement\_Fragment\_111222\_76.apit  
 Acquired Datetime : 2022/11/12 18:22:23

● **Search Parameters**

Library list :  
 IRs Polymer2  
 ATR-Polymer2  
 T-Polymer2  
 Maximum hits: 200  
 Minimum quality : 0  
 Algorithm : DiffDeriv

| Score | Library      | Name        | Comment                                                                                                                                                                    |
|-------|--------------|-------------|----------------------------------------------------------------------------------------------------------------------------------------------------------------------------|
| 577   | IRs Polymer2 | Irganox1330 | Irganox 1330 ANTIOXIDANT<br>(Penol)C54H78O31,3,5-<br>TRIMETHYL-2,4,6-TRIS(3,5-DI-<br>tert-BUTYL-4-<br>HYDROXYBENZYL)BENZENECAS<br>NO. 1709-70-2ATR/diamond<br>ATRcorrected |

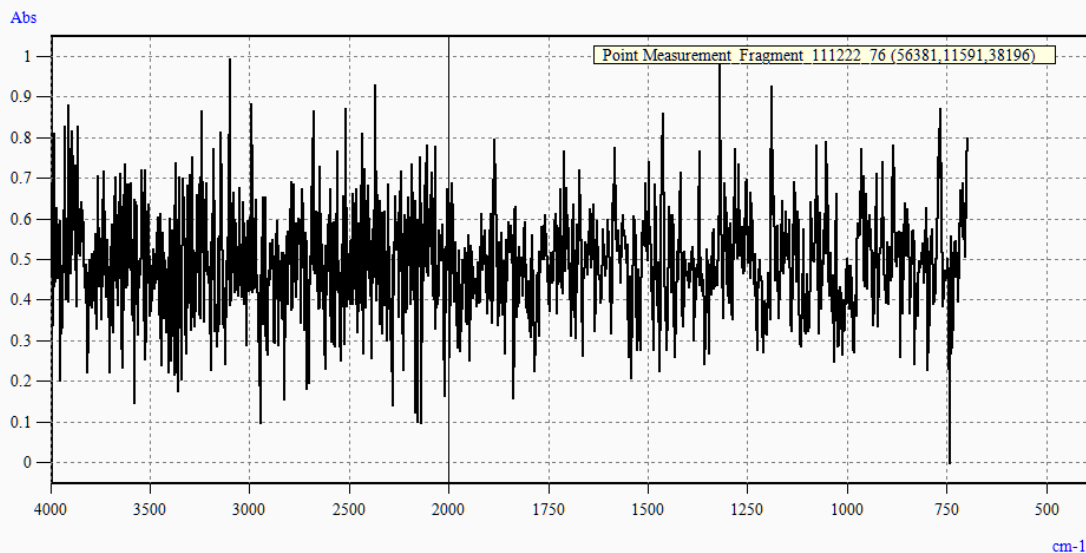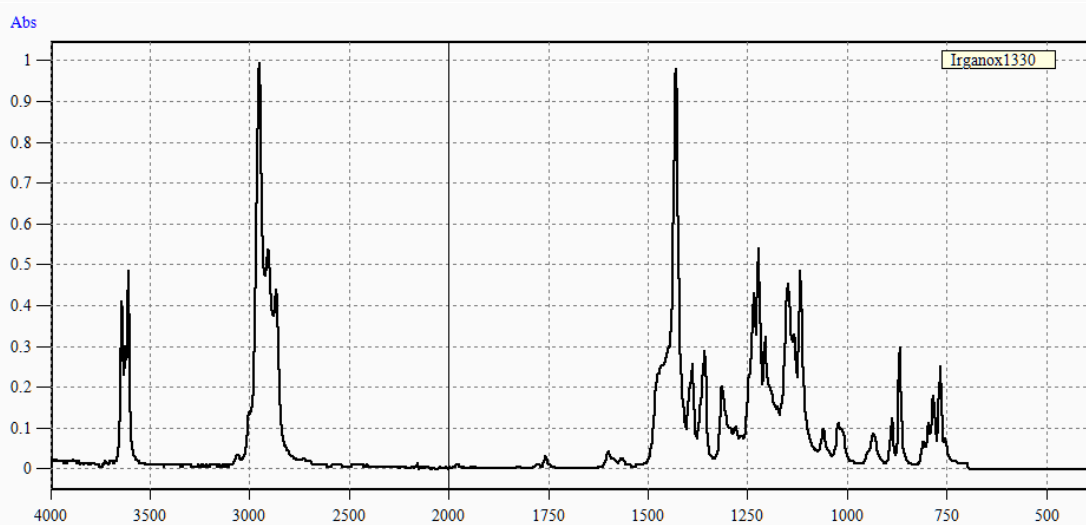

Irganox 1330 ANTIOXIDANT (Penol)C54H78O31,3,5-TRIMETHYL-2,4,6-TRIS(3,5-DI-tert-BUTYL-4-HYDROXYBENZYL)BENZENE CAS NO. 9709-70-2A

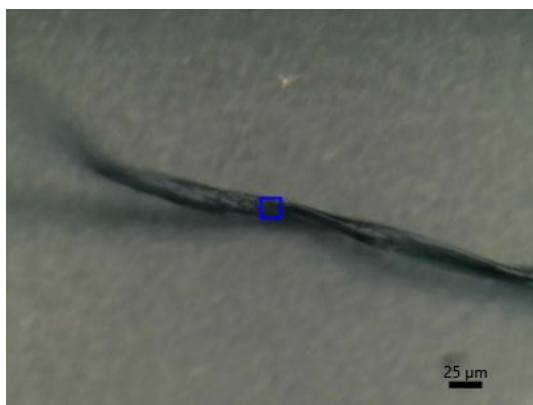

## Search Result Report

Filename : C:\Users\User\Desktop\UTSA  
 samples\UV042821HA46\Point\_measurement\_Fragment\_111322\_35.apit  
 Acquired Datetime : 2022/11/13 12:58:13

### ● Search Parameters

Library list :  
 IRs Polymer2  
 ATR-Polymer2  
 T-Polymer2  
 Maximum hits: 200  
 Minimum quality : 0  
 Algorithm : DiffDeriv

| Score | Library      | Name | Comment                                                                  |
|-------|--------------|------|--------------------------------------------------------------------------|
| 584   | IRs Polymer2 | PVDC | PVDC,Poly (vinylidene chloride)<br>/wlap filmATR/diamond<br>ATRcorrected |

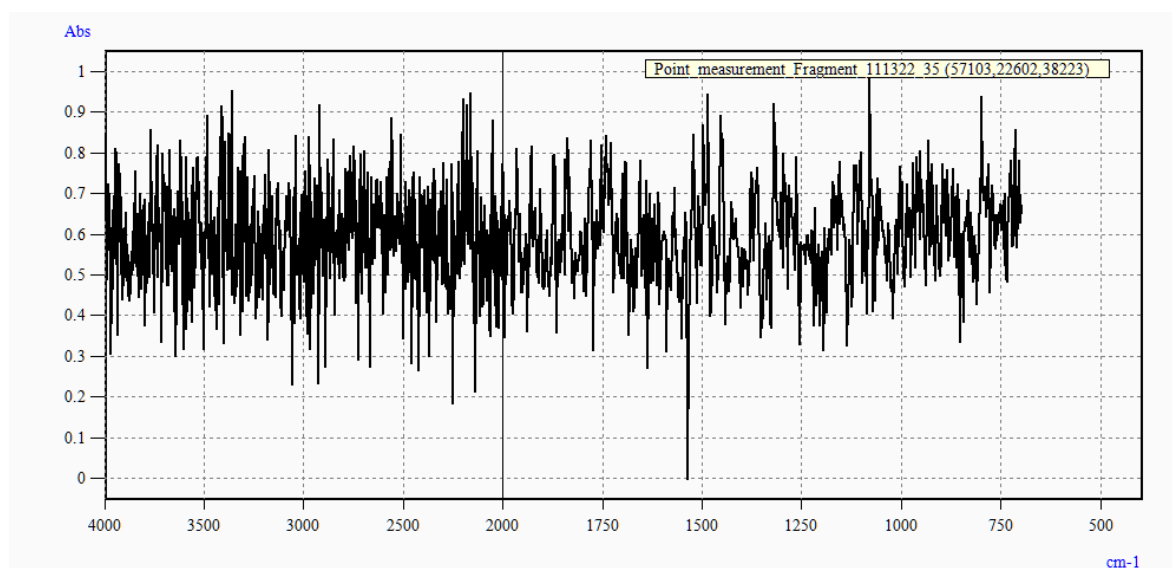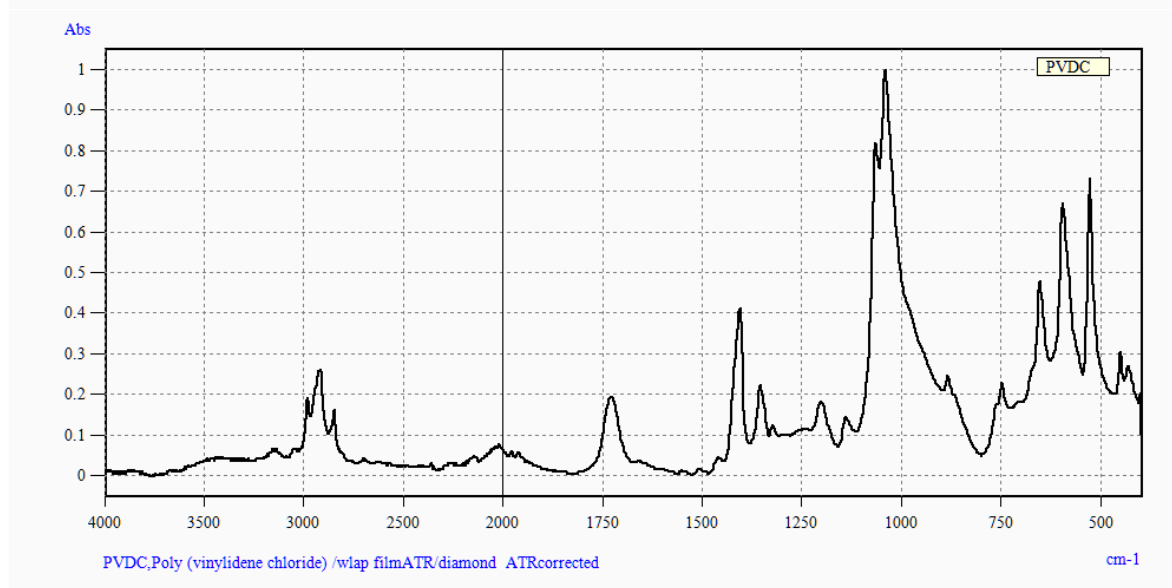

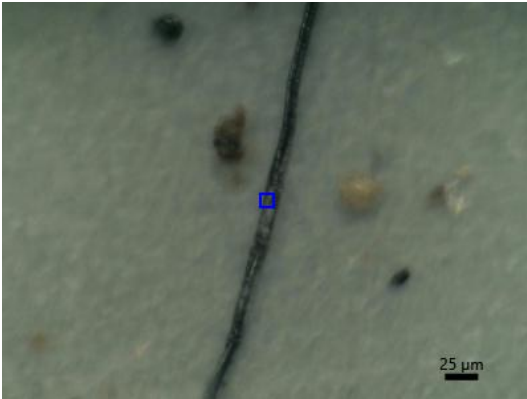

## Search Result Report

Filename : C:\Users\User\Desktop\UTSA  
samples\UV042821HA46\Point\_measurement\_Fragment\_111322\_36.apit  
Acquired Datetime : 2022/11/13 13:05:19

### ● Search Parameters

Library list :  
IRs Polymer2  
ATR-Polymer2  
T-Polymer2  
Maximum hits: 200  
Minimum quality : 0  
Algorithm : DiffDeriv

| Score | Library      | Name | Comment |
|-------|--------------|------|---------|
| 566   | IRs Polymer2 | PES  | PESFilm |

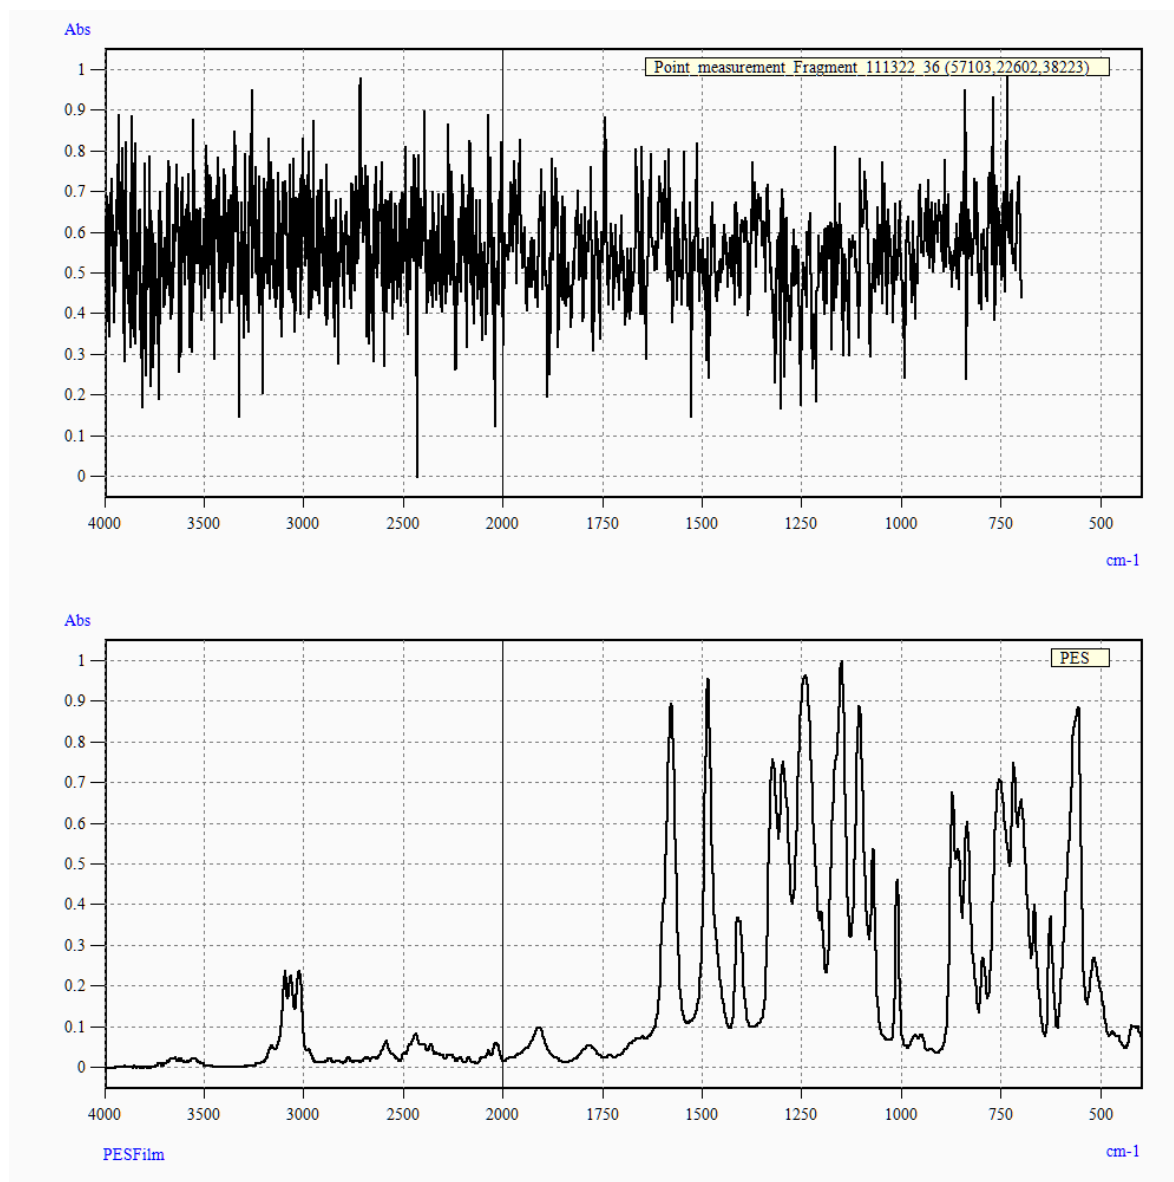

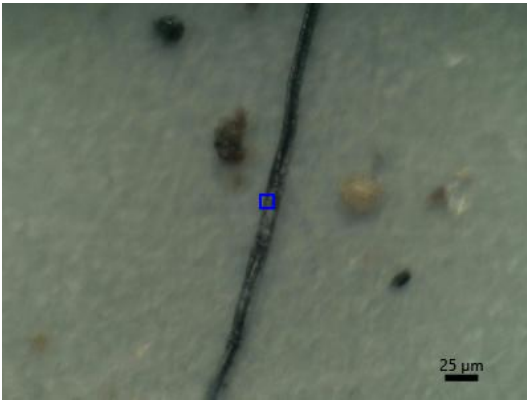

## Search Result Report

Filename : C:\Users\User\Desktop\UTSA  
 samples\UV042821HA46\Point\_measurement\_Fragment\_111322\_37.apit  
 Acquired Datetime : 2022/11/13 13:07:11

### ● Search Parameters

Library list :  
 IRs Polymer2  
 ATR-Polymer2  
 T-Polymer2  
 Maximum hits: 200  
 Minimum quality : 0  
 Algorithm : DiffDeriv

| Score | Library      | Name             | Comment                                                               |
|-------|--------------|------------------|-----------------------------------------------------------------------|
| 585   | ATR-Polymer2 | D_PP_Chlorinated | Polypropylene,<br>Chlorinated(Chlorine content 65%)<br>DuraSamplIR-II |

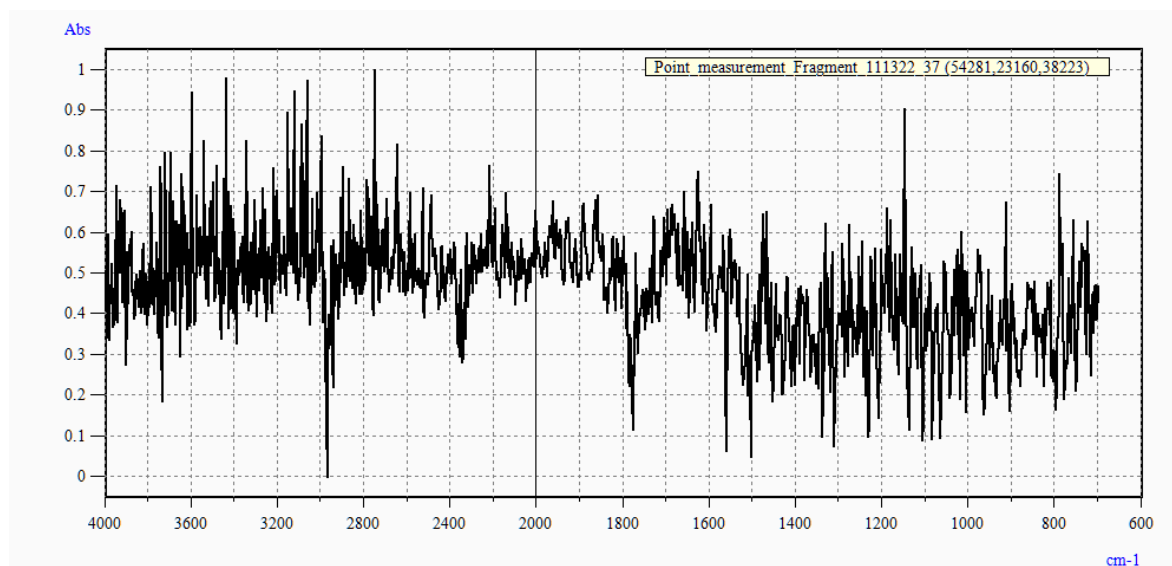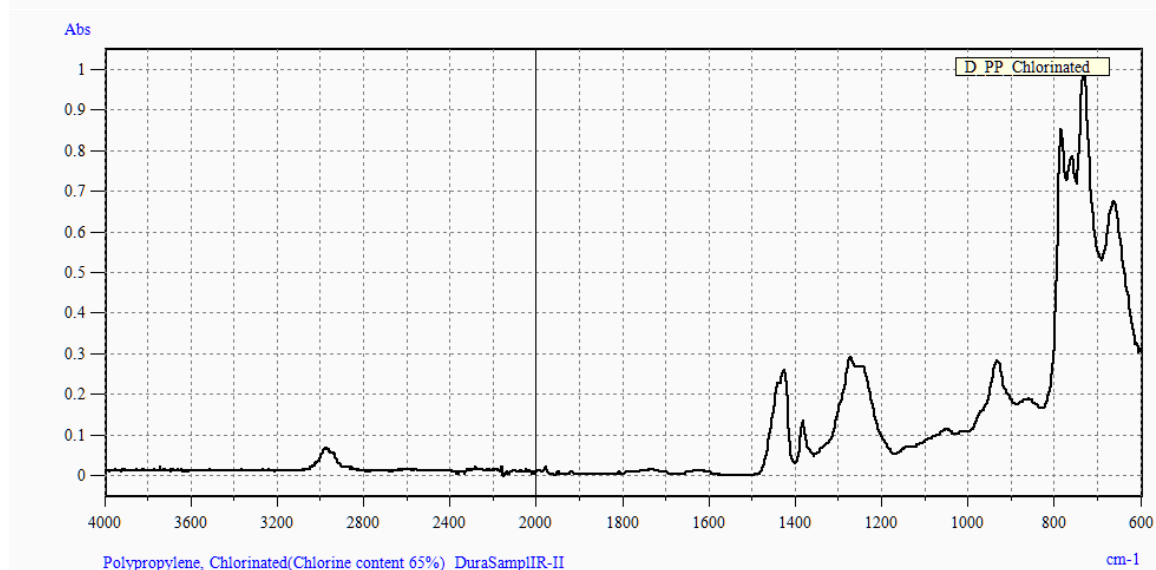

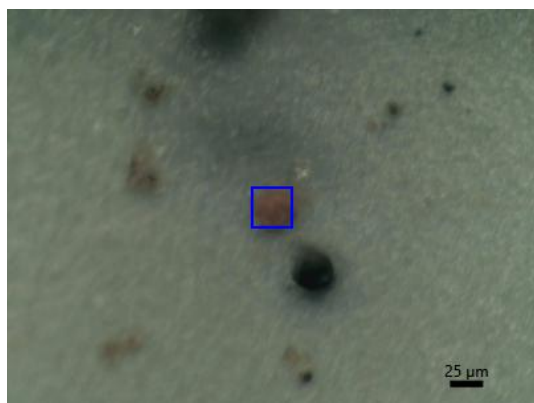

## Search Result Report

Filename : C:\Users\User\Desktop\UTSA  
samples\UV042821HA46\Point\_measurement\_Fragment\_111322\_38.apit

Acquired Datetime : 2022/11/13 13:09:22

● **Search Parameters**

Library list :

IRs Polymer2

ATR-Polymer2

T-Polymer2

Maximum hits: 200

Minimum quality : 0

Algorithm : DiffDeriv

| Score | Library      | Name  | Comment                                                                                  |
|-------|--------------|-------|------------------------------------------------------------------------------------------|
| 580   | IRs Polymer2 | P-EPQ | P-EPQANTIOXIDANT<br>PHOSPHONITE<br>COMPOUNDC68H92O4P2CAS<br>NO. ATR/diamond ATRcorrected |

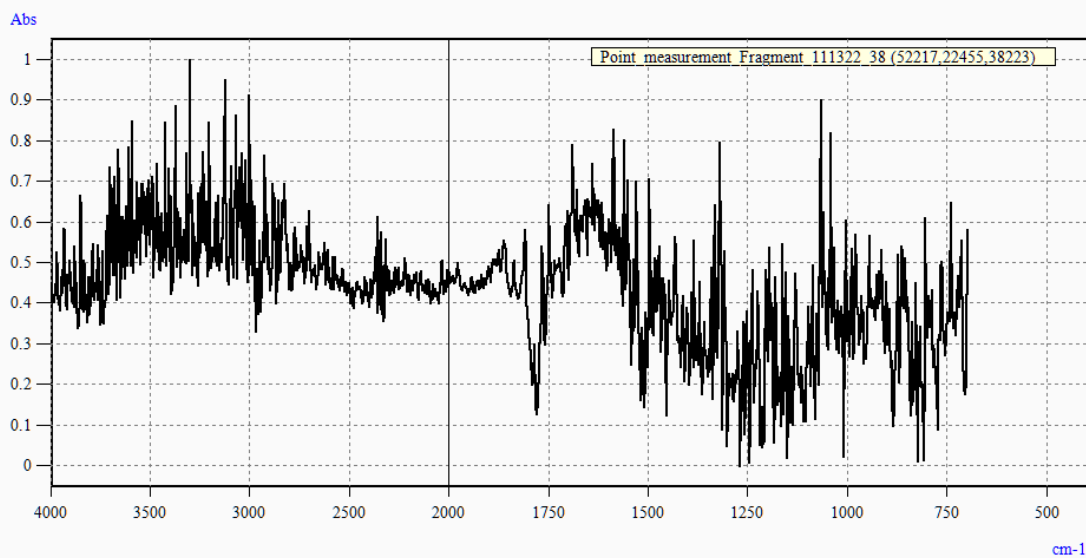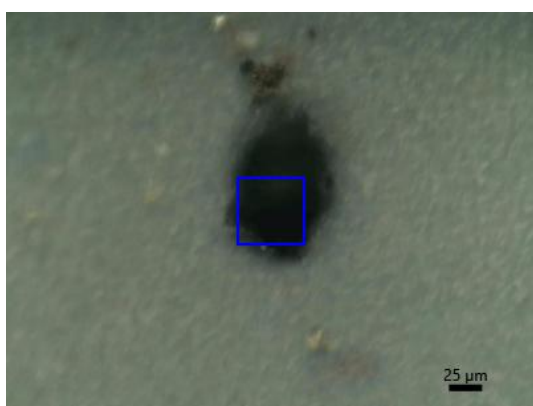

## Search Result Report

Filename : C:\Users\User\Desktop\UTSA  
samples\UV042821HA46\Point\_measurement\_Fragment\_111322\_39.apit

Acquired Datetime : 2022/11/13 13:10:59

● **Search Parameters**

Library list :

IRs Polymer2

ATR-Polymer2

T-Polymer2

Maximum hits: 200

Minimum quality : 0

Algorithm : DiffDeriv

| Score | Library      | Name     | Comment                                                                                  |
|-------|--------------|----------|------------------------------------------------------------------------------------------|
| 591   | ATR-Polymer2 | D_PPO-PA | Polyphenylene<br>Oxide(Polyphenylene<br>Ether)/Polyamide(PPO/PA NORYL)<br>DuraSamplIR-II |

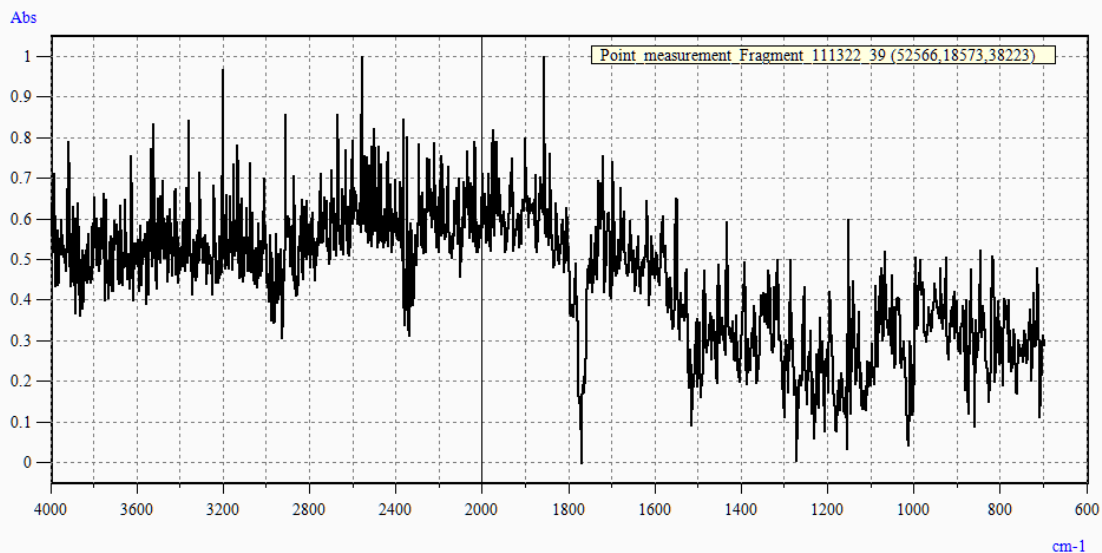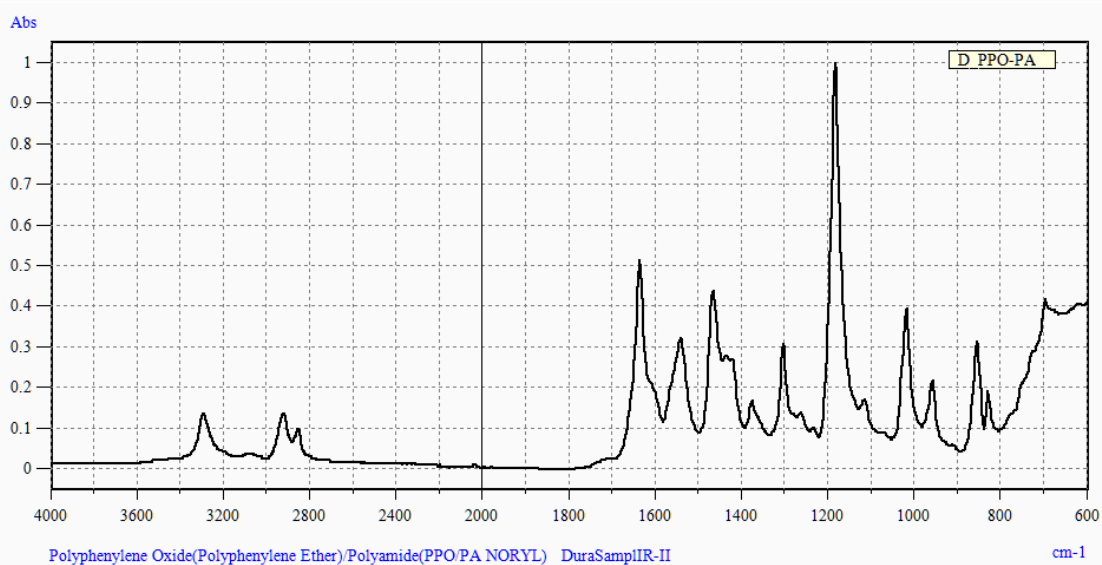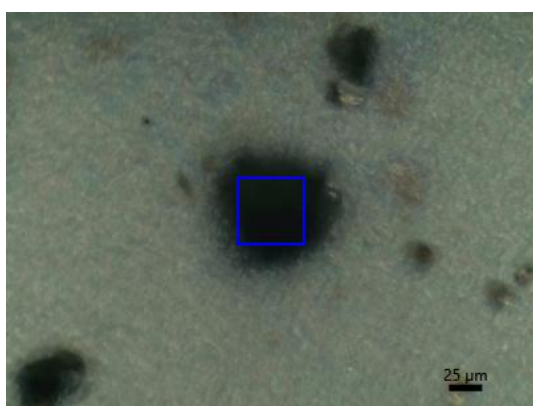

# Search Result Report

Filename : C:\Users\User\Desktop\UTSA samples\UV042821HA46\Point\_measurement\_Fragment\_111322\_40.apit  
 Acquired Datetime : 2022/11/13 13:13:43

● Search Parameters

Library list : Polymer2  
 IRs : ATR-Polymer2  
 T-Polymer2  
 Maximum hits: 200  
 Minimum quality : 0  
 Algorithm : DiffDeriv

| Score | Library    | Name           | Comment                                                      |
|-------|------------|----------------|--------------------------------------------------------------|
| 604   | T-Polymer2 | Irganox MD1024 | Polymer Additive(Irganox MD1024)<br>Transmission(Microscope) |

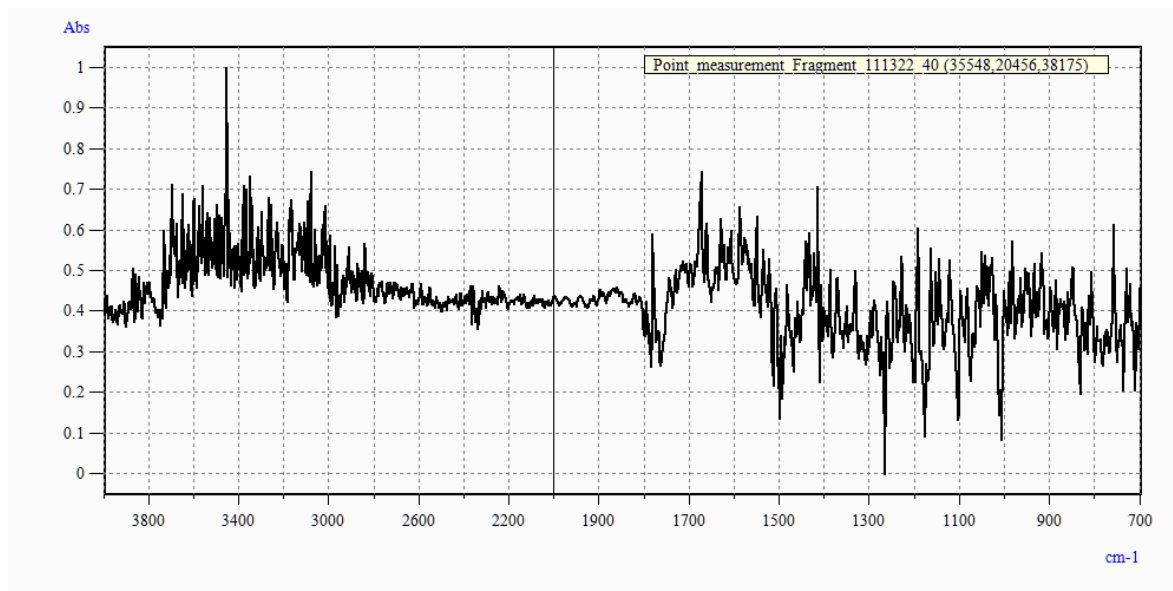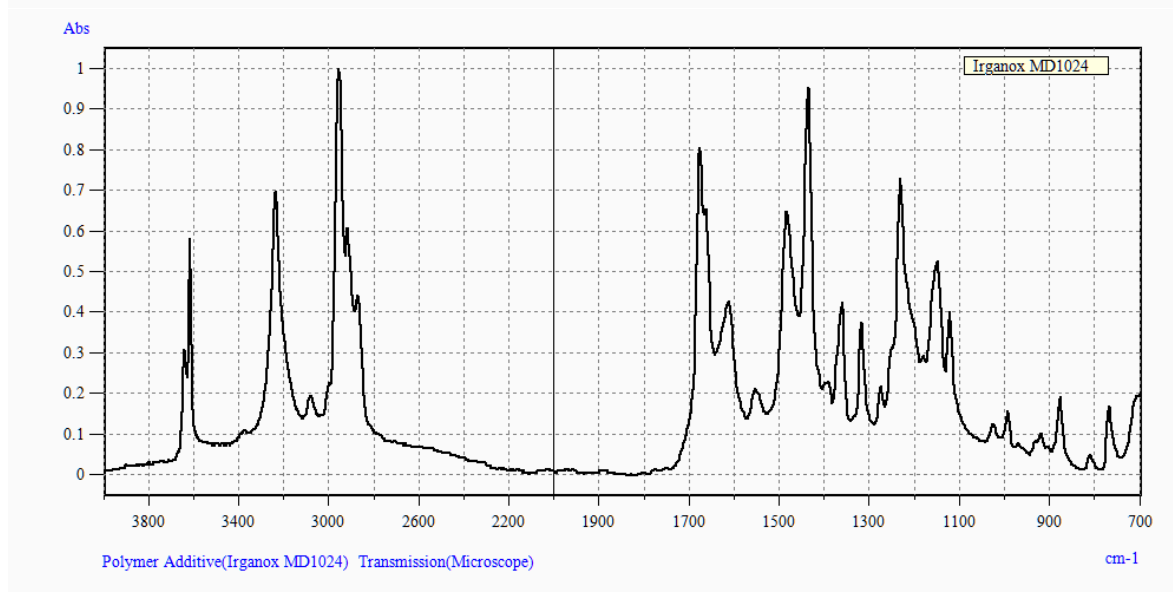

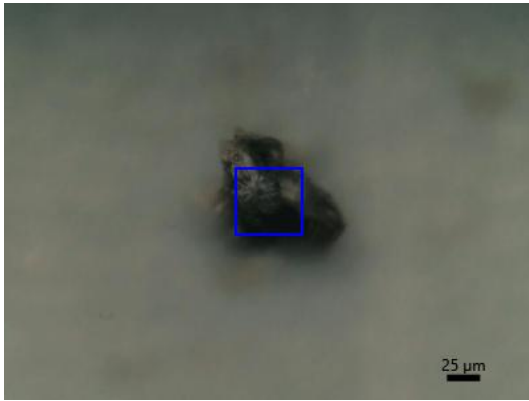

## Search Result Report

Filename : C:\Users\User\Desktop\UTSA  
 samples\UV042821HA46\Point\_measurement\_Fragment\_111322\_41.apit  
 Acquired Datetime : 2022/11/13 13:15:35

### ● Search Parameters

Library list : Polymer2  
 IRs  
 ATR-Polymer2  
 T-Polymer2  
 Maximum hits: 200  
 Minimum quality : 0  
 Algorithm : DiffDeriv

| Score | Library      | Name  | Comment                  |
|-------|--------------|-------|--------------------------|
| 581   | ATR-Polymer2 | D_PI4 | Polyimide DuraSamplIR-II |

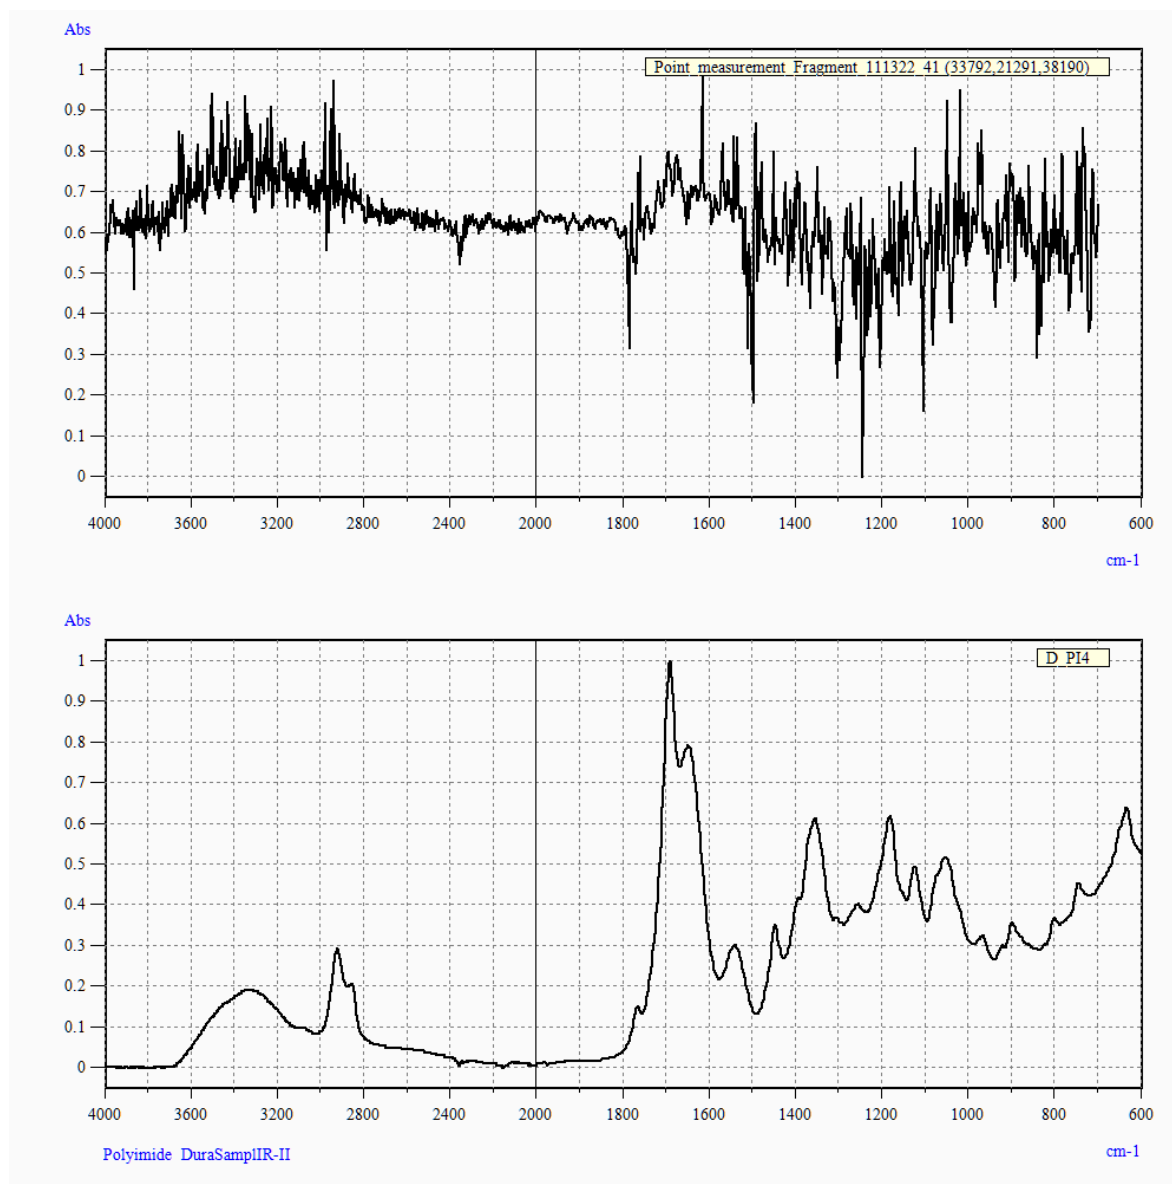

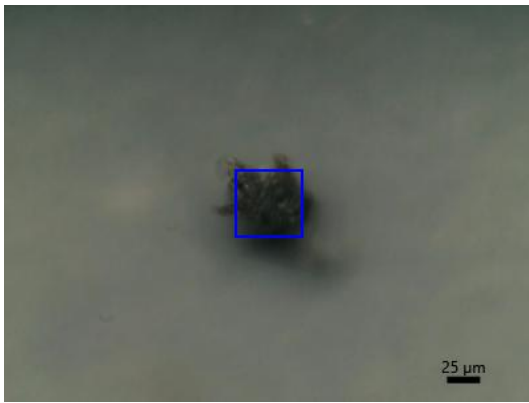

## Search Result Report

Filename : C:\Users\User\Desktop\UTSA  
 samples\UV042821HA46\Point\_measurement\_Fragment\_111322\_42.apit  
 Acquired Datetime : 2022/11/13 13:17:11

● **Search Parameters**

Library list :  
 IRs Polymer2  
 ATR-Polymer2  
 T-Polymer2  
 Maximum hits: 200  
 Minimum quality : 0  
 Algorithm : DiffDeriv

| Score | Library      | Name | Comment                                                                                                            |
|-------|--------------|------|--------------------------------------------------------------------------------------------------------------------|
| 606   | IRs Polymer2 | PETG | Polyethylene glycol<br>ORIGIN Date:<br>92/03/27 File:<br>PETG.DXINFRARED<br>SPECTROPHOTOMETER FTIR-<br>8000 SERIES |

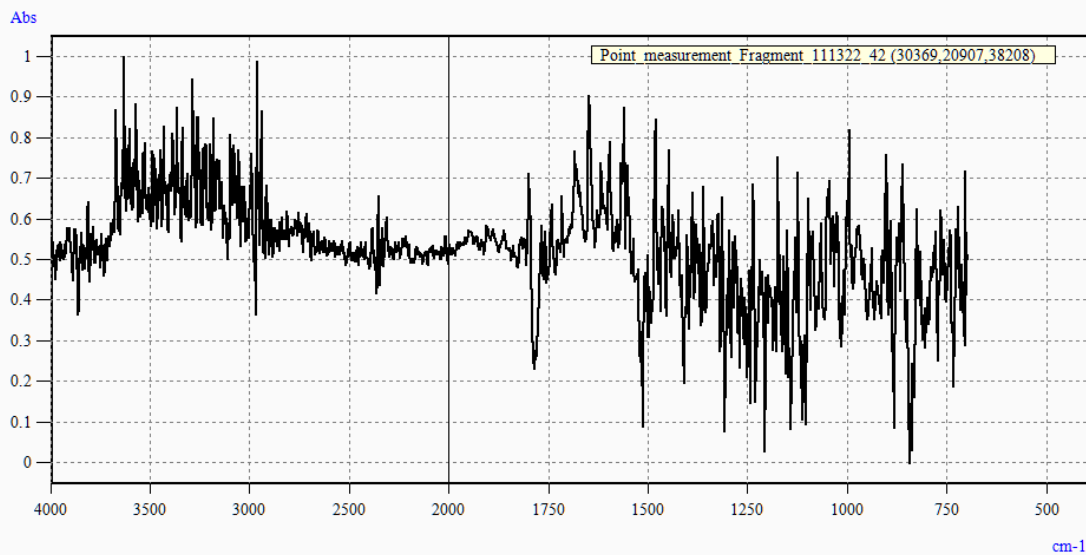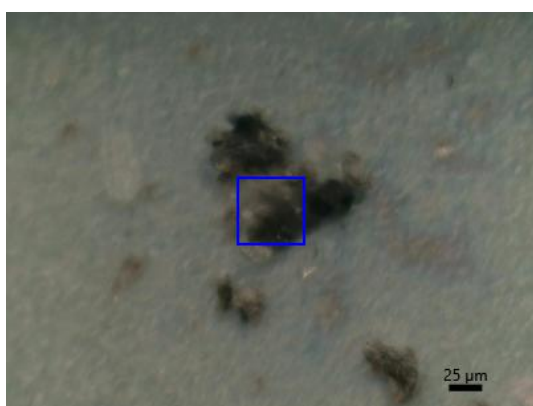

## Search Result Report

Filename : C:\Users\User\Desktop\UTSA  
 samples\UV042821HA46\Point\_measurement\_Fragment\_111322\_43.apit  
 Acquired Datetime : 2022/11/13 13:18:28

### ● Search Parameters

Library list :  
 IRs Polymer2  
 ATR-Polymer2  
 T-Polymer2  
 Maximum hits: 200  
 Minimum quality : 0  
 Algorithm : DiffDeriv

| Score | Library      | Name | Comment         |
|-------|--------------|------|-----------------|
| 600   | IRs Polymer2 | PS1  | PolystyreneFilm |

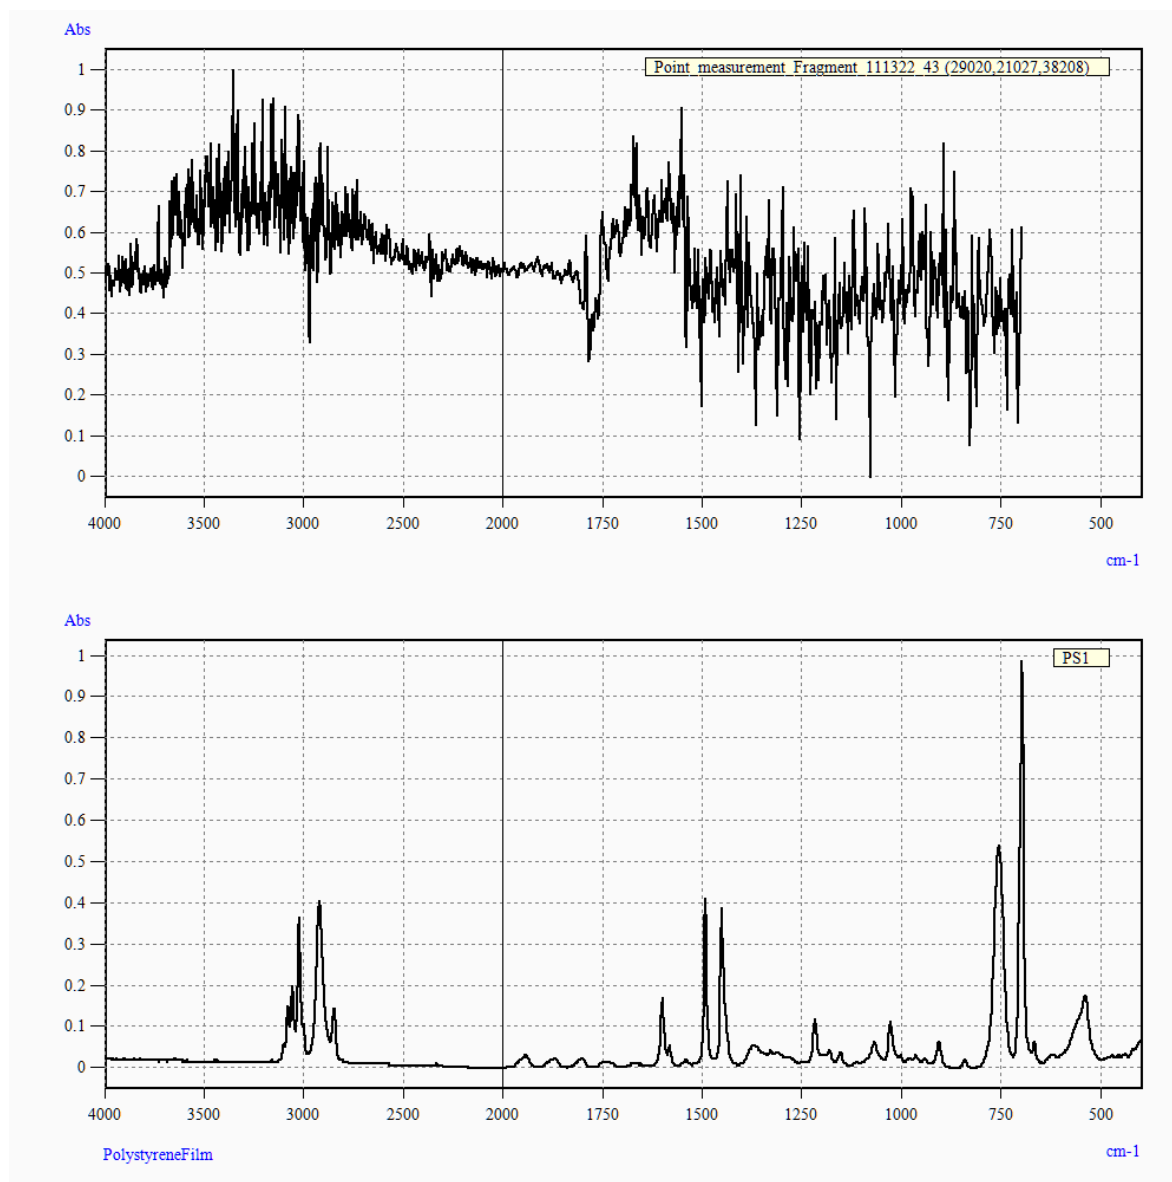

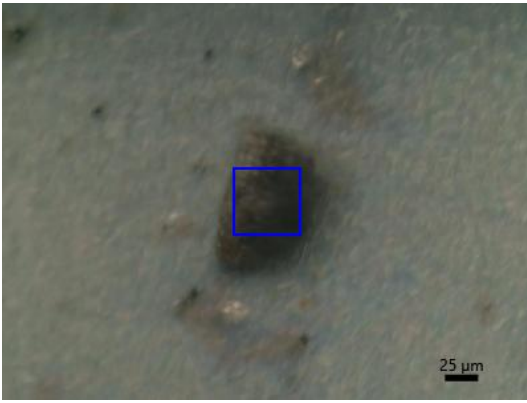

## Search Result Report

Filename : C:\Users\User\Desktop\UTSA  
 samples\UV042821HA46\Point\_measurement\_Fragment\_111322\_44.apit  
 Acquired Datetime : 2022/11/13 13:19:46

### ● Search Parameters

Library list :  
 IRs Polymer2  
 ATR-Polymer2  
 T-Polymer2  
 Maximum hits: 200  
 Minimum quality : 0  
 Algorithm : DiffDeriv

| Score | Library      | Name  | Comment                             |
|-------|--------------|-------|-------------------------------------|
| 602   | ATR-Polymer2 | D_PI1 | Polyimide(UPILEX)<br>DuraSamplIR-II |

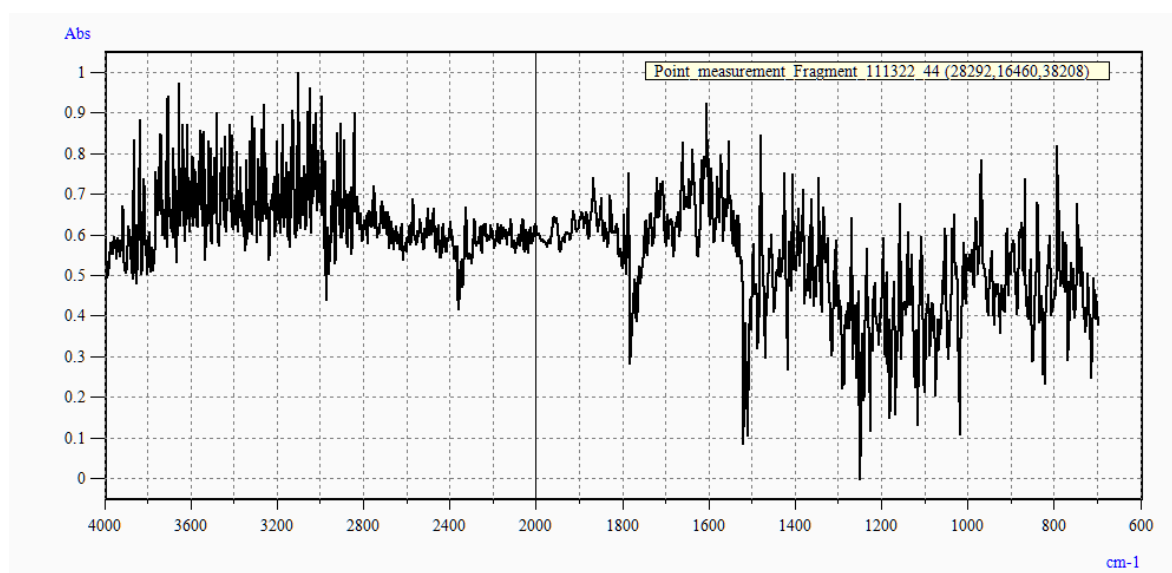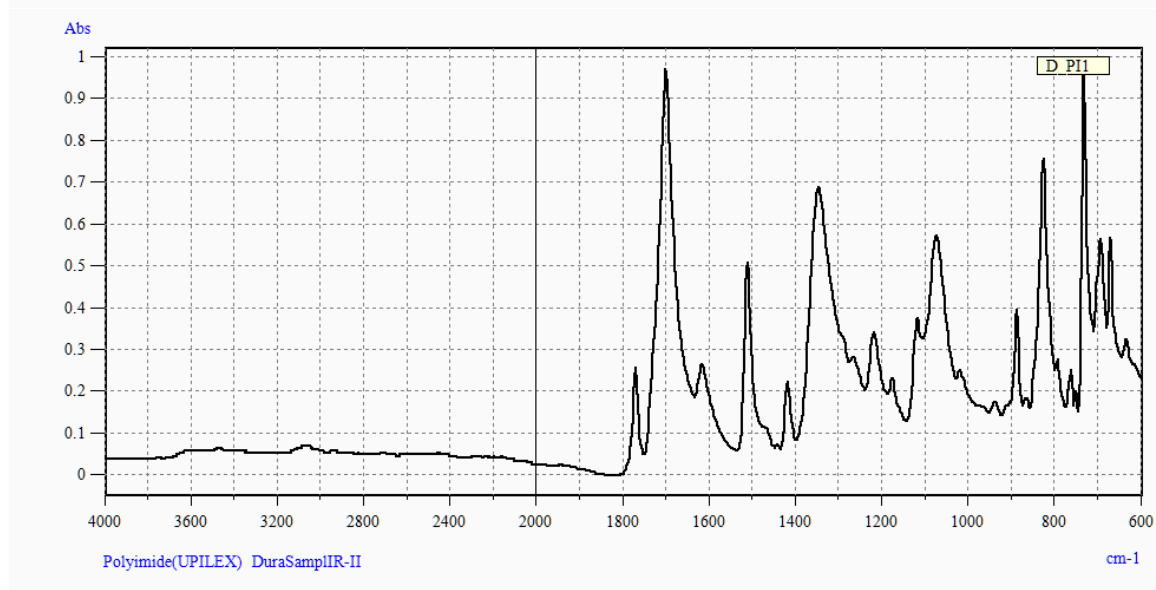

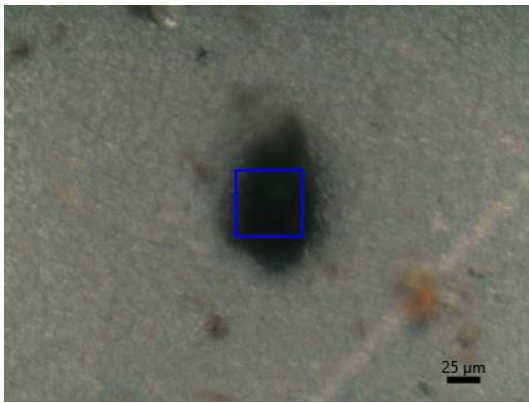

## Search Result Report

Filename : C:\Users\User\Desktop\UTSA  
 samples\UV042821HA46\Point\_measurement\_Fragment\_111322\_45.apit  
 Acquired Datetime : 2022/11/13 13:21:37

### ● Search Parameters

Library list :  
 IRs Polymer2  
 ATR-Polymer2  
 T-Polymer2  
 Maximum hits: 200  
 Minimum quality : 0  
 Algorithm : DiffDeriv

| Score | Library      | Name     | Comment                                                          |
|-------|--------------|----------|------------------------------------------------------------------|
| 598   | ATR-Polymer2 | D_Hc-BR2 | High-cis Butadiene Rubber(High-cis Polybutadiene) DuraSamplIR-II |

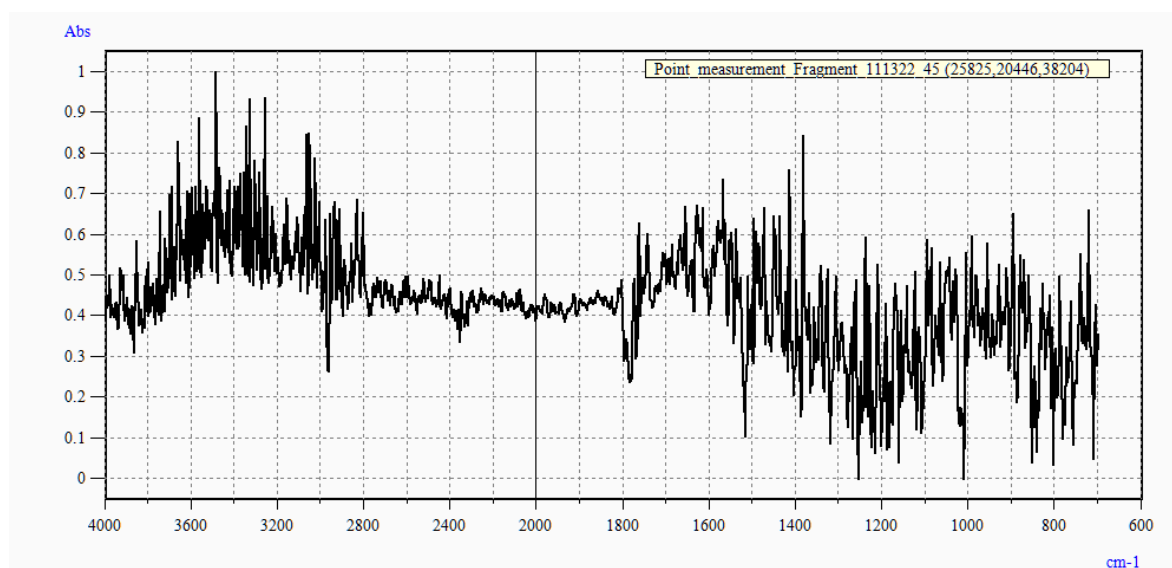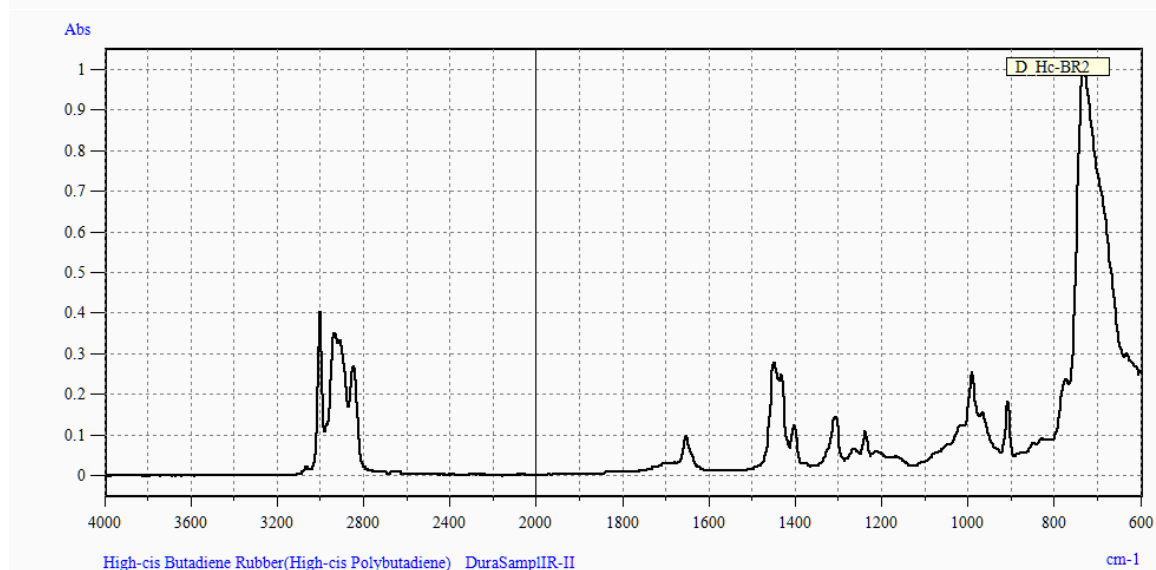

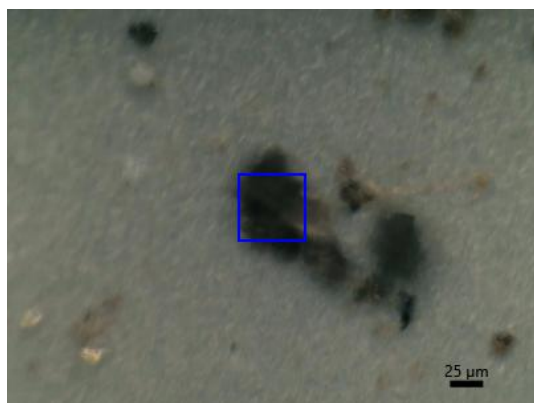

# Search Result Report

Filename : C:\Users\User\Desktop\UTSA samples\UV042821HA46\Point\_measurement\_Fragment\_111322\_46.apit

Acquired Datetime : 2022/11/13 13:24:13

● **Search Parameters**

Library list :

IRs

Polymer2

ATR-Polymer2

T-Polymer2

Maximum hits:

200

Minimum quality :

0

Algorithm : DiffDeriv

| Score | Library    | Name  | Comment                                                  |
|-------|------------|-------|----------------------------------------------------------|
| 595   | T-Polymer2 | Epoxy | Epoxy Resin(Electronic Parts-3) Transmission(Microscope) |

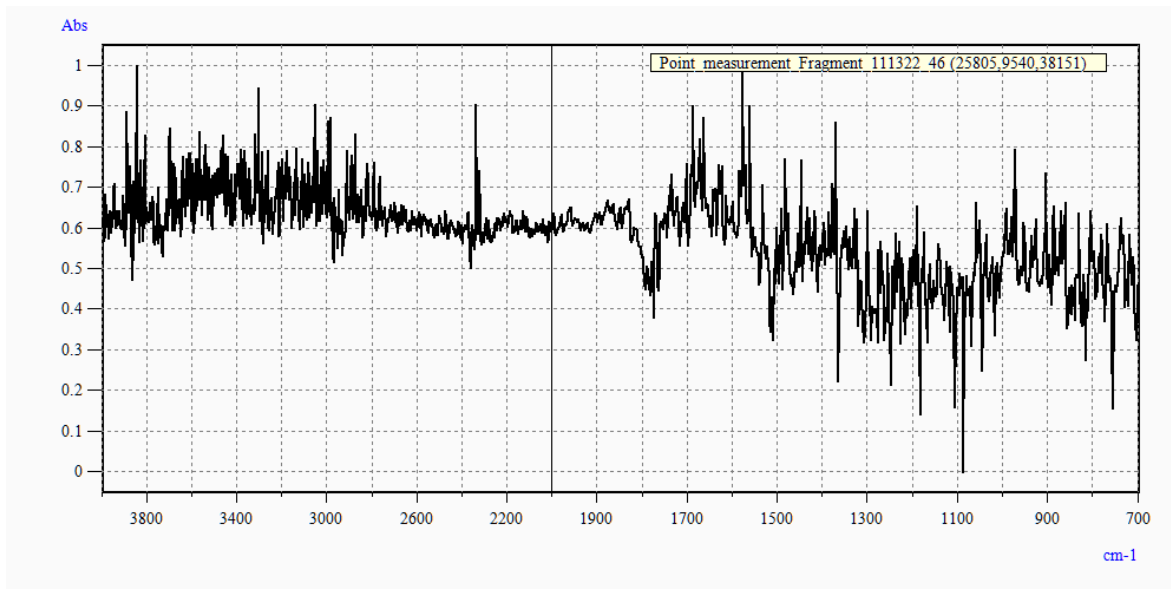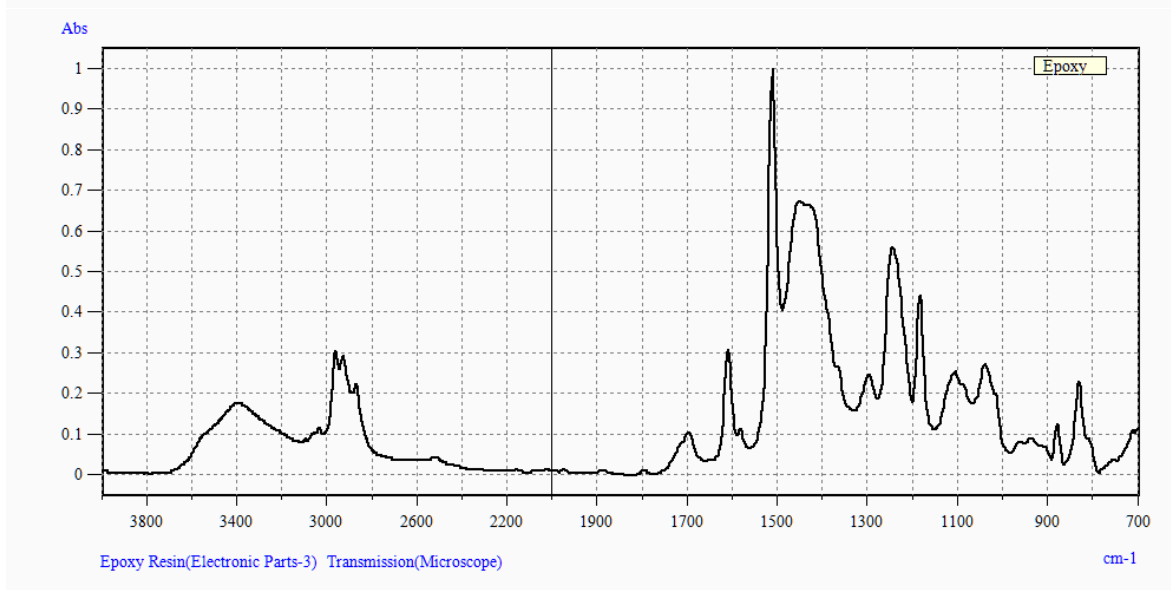

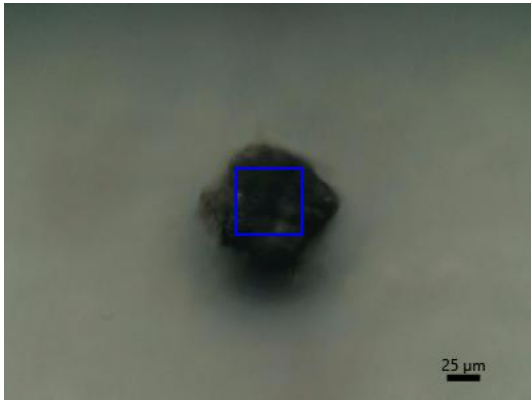

## Search Result Report

Filename : C:\Users\User\Desktop\UTSA  
 samples\UV042821HA46\Point\_measurement\_Fragment\_111322\_47.apit  
 Acquired Datetime : 2022/11/13 13:28:09

### ● Search Parameters

Library list :  
 IRs Polymer2  
 ATR-Polymer2  
 T-Polymer2  
 Maximum hits: 200  
 Minimum quality : 0  
 Algorithm : DiffDeriv

| Score | Library      | Name | Comment                          |
|-------|--------------|------|----------------------------------|
| 616   | ATR-Polymer2 | D_PC | Polycarbonate(PC) DuraSamplIR-II |

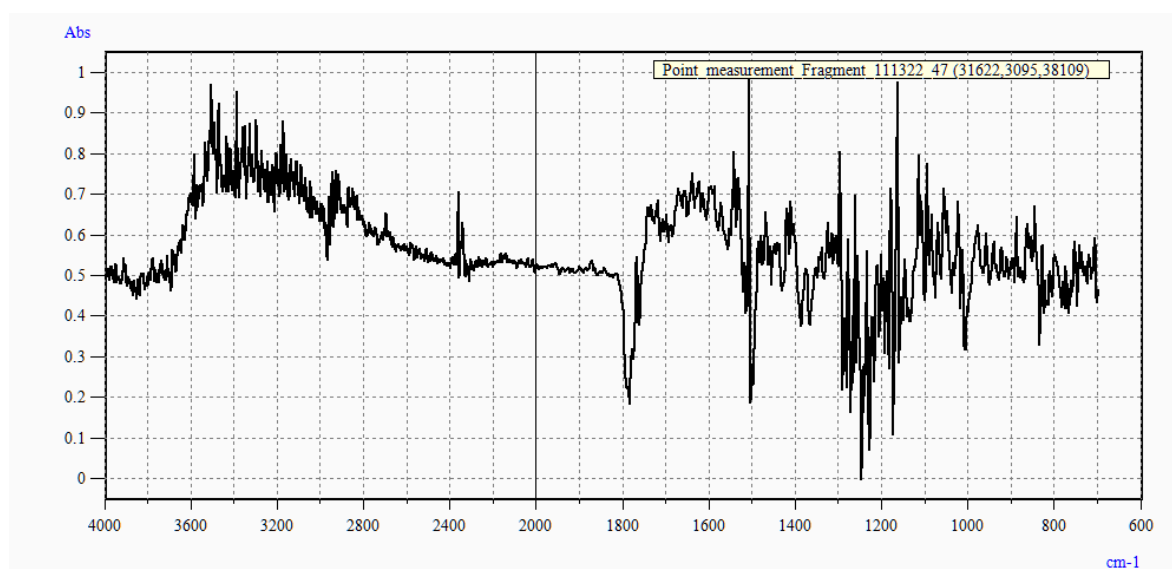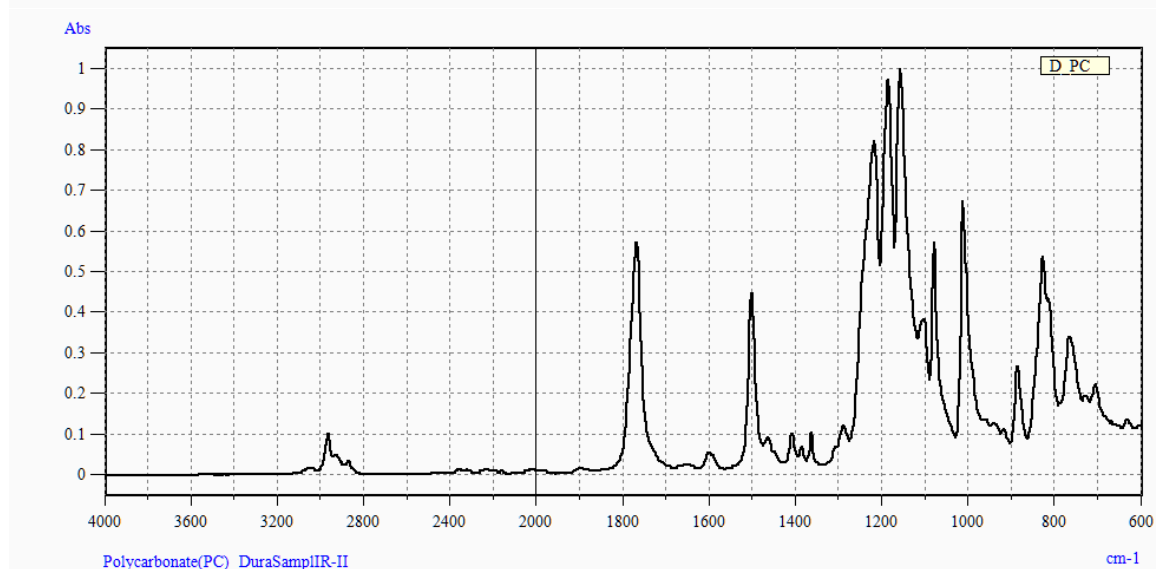

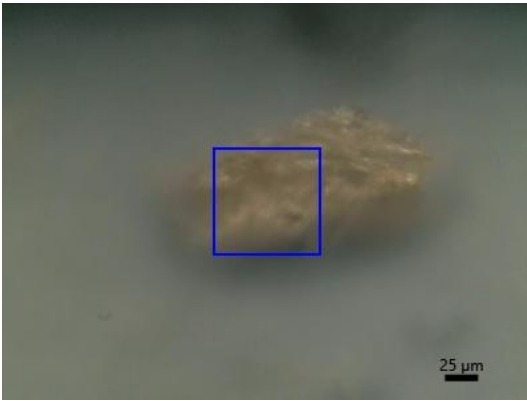

# Search Result Report

Filename : C:\Users\User\Desktop\UTSA samples\UV042821HA46\Point\_measurement\_Fragment\_111322\_48.apit

Acquired Datetime : 2022/11/13 13:29:59

● **Search Parameters**

Library list : Polymer2  
 IRs :  
 ATR-Polymer2  
 T-Polymer2  
 Maximum hits: 200  
 Minimum quality : 0  
 Algorithm : DiffDeriv

| Score | Library      | Name     | Comment                     |
|-------|--------------|----------|-----------------------------|
| 593   | ATR-Polymer2 | D_Aramid | Aramid Fiber DuraSamplIR-II |

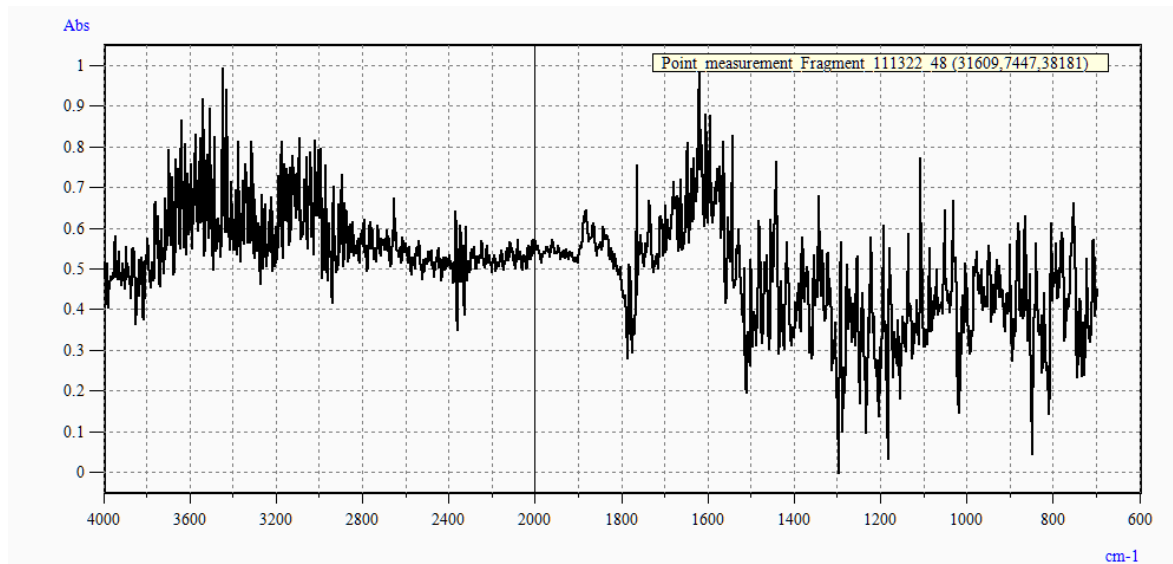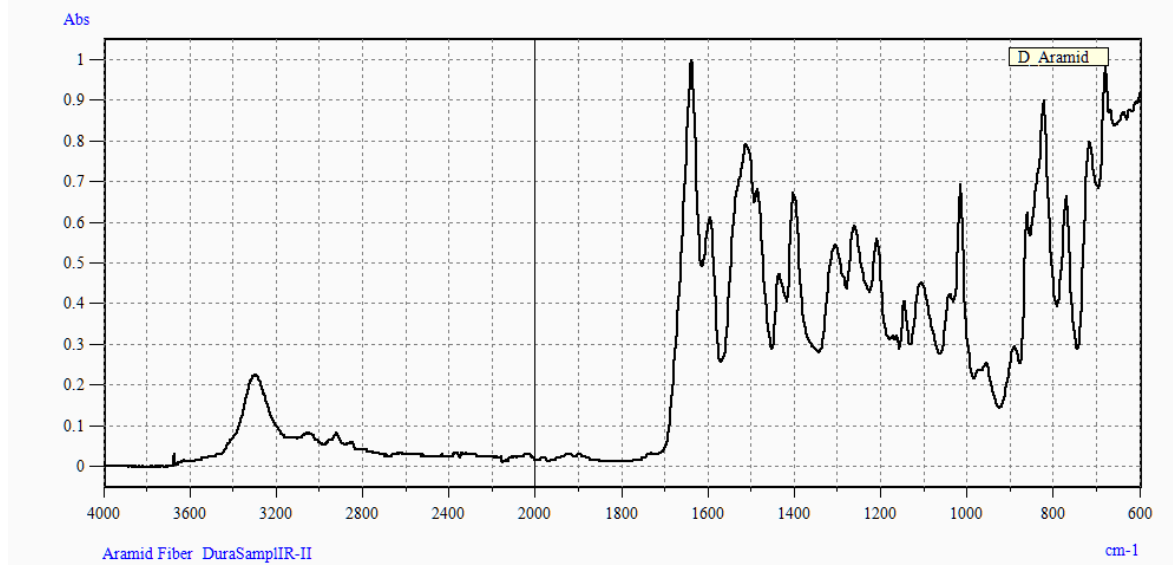

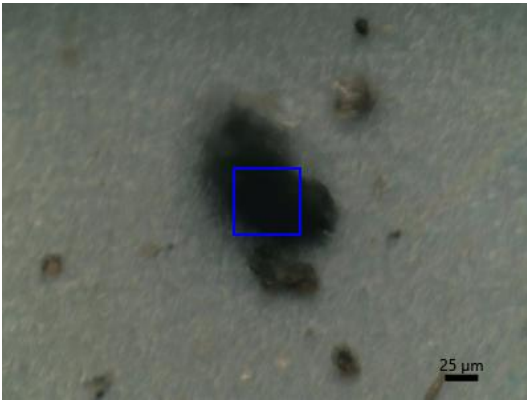

## Search Result Report

Filename : C:\Users\User\Desktop\UTSA  
samples\UV042821HA46\Point\_measurement\_Fragment\_111322\_49.apit

Acquired Datetime : 2022/11/13 13:33:30

### ● Search Parameters

Library list :

IRs

Polymer2

ATR-Polymer2

T-Polymer2

Maximum hits:

200

Minimum quality :

0

Algorithm : DiffDeriv

| Score | Library    | Name | Comment                                       |
|-------|------------|------|-----------------------------------------------|
| 669   | T-Polymer2 | PC   | Polycarbonate(PC)<br>Transmission(Microscope) |

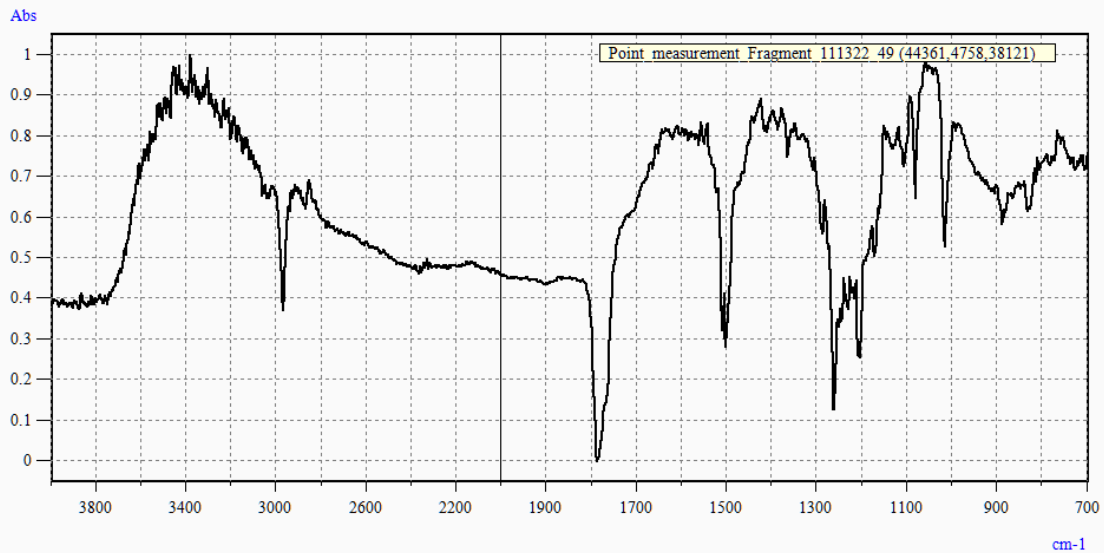

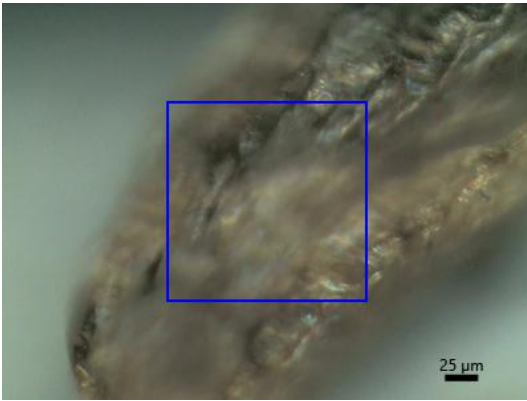

## Search Result Report

Filename : C:\Users\User\Desktop\UTSA  
samples\UV042821HA46\Point\_measurement\_Fragment\_111322\_50.apit

Acquired Datetime : 2022/11/13 13:36:11

### ● Search Parameters

Library list :

IRs

Polymer2

ATR-Polymer2

T-Polymer2

Maximum hits:

200

Minimum quality :

0

Algorithm : DiffDeriv

| Score | Library      | Name         | Comment                                    |
|-------|--------------|--------------|--------------------------------------------|
| 580   | ATR-Polymer2 | D_Polyester2 | Polyester Film(TAIKO-FE)<br>DuraSamplIR-II |

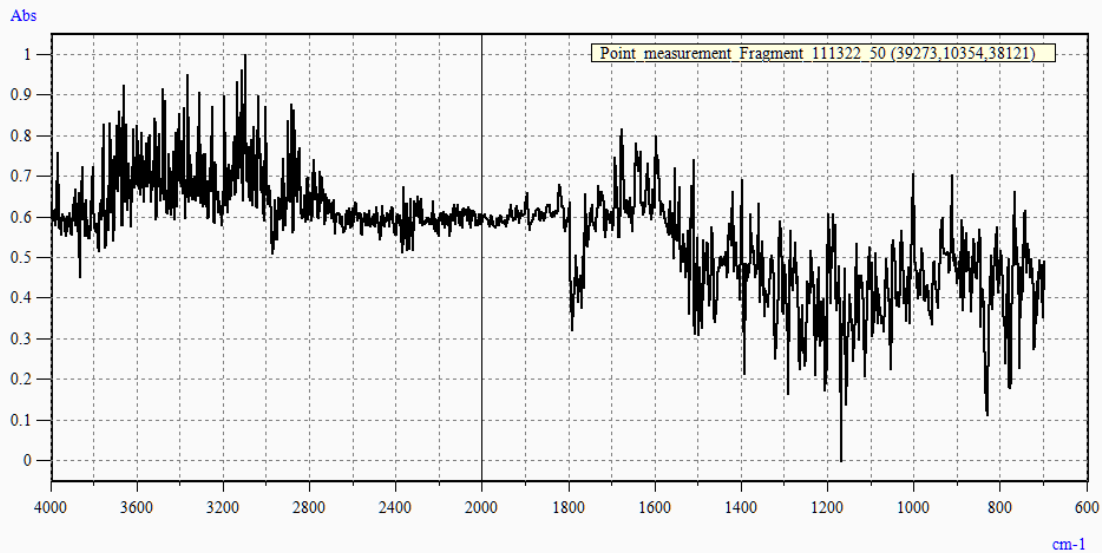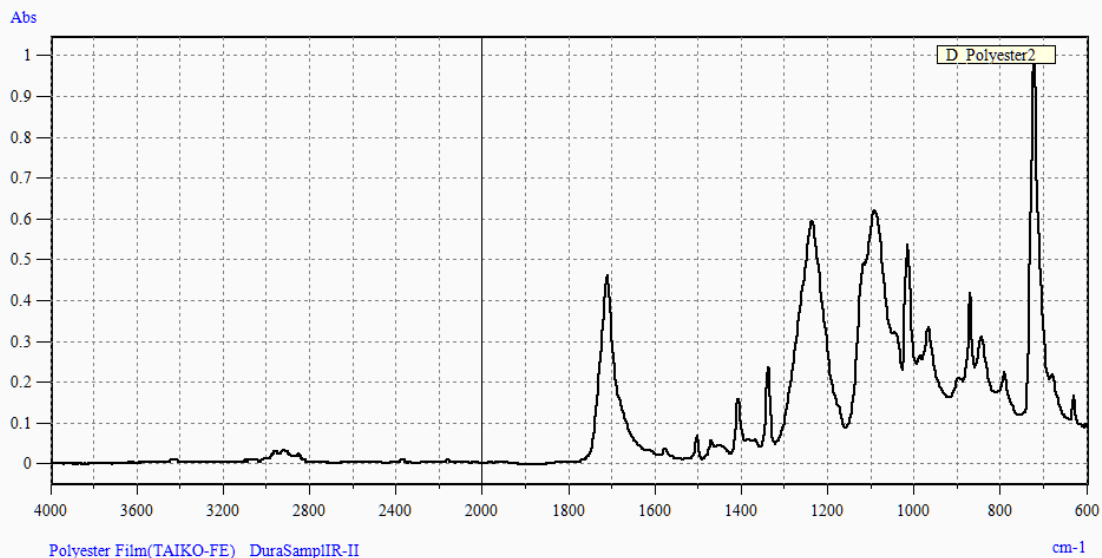

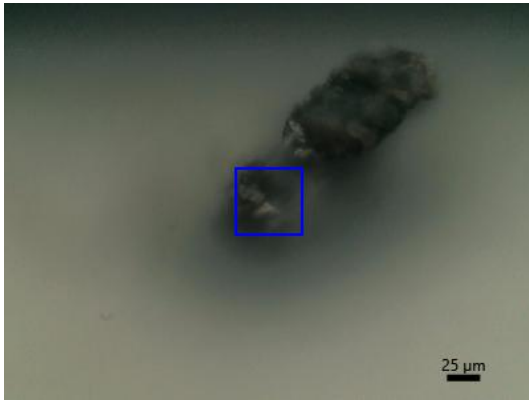

# Search Result Report

Filename : C:\Users\User\Desktop\UTSA samples\UV042821HA46\Point\_measurement\_Fragment\_111322\_51.apit  
 Acquired Datetime : 2022/11/13 13:38:44

● **Search Parameters**

Library list :  
 IRs Polymer2  
 ATR-Polymer2  
 T-Polymer2  
 Maximum hits: 200  
 Minimum quality : 0  
 Algorithm : DiffDeriv

| Score | Library    | Name  | Comment                                     |
|-------|------------|-------|---------------------------------------------|
| 591   | T-Polymer2 | Epoxy | Epoxy Adhesives<br>Transmission(Microscope) |

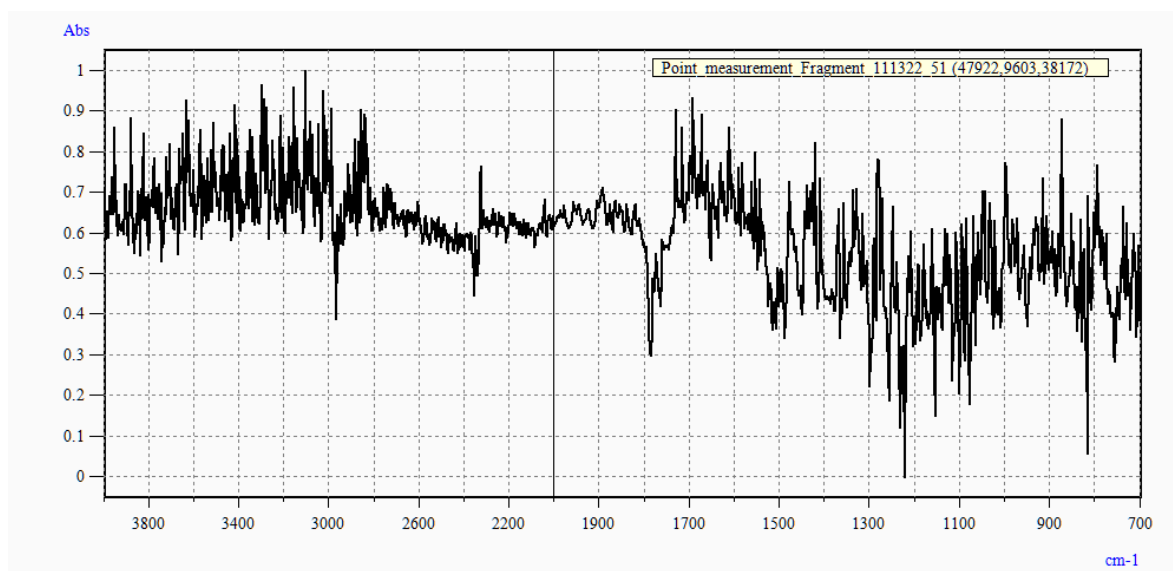

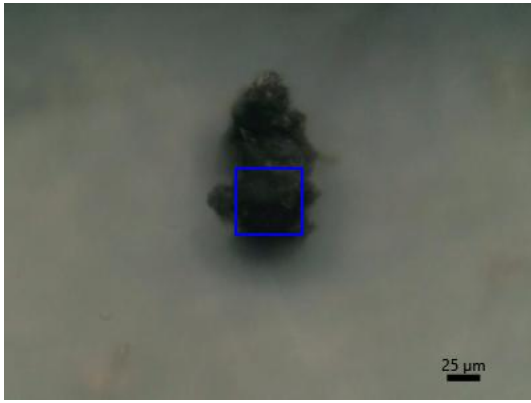

# Search Result Report

Filename : C:\Users\User\Desktop\UTSA samples\UV042821HA48\Point  
 Measurement\_Fragment\_111222\_76.apit  
 Acquired Datetime : 2022/11/12 18:51:28

● **Search Parameters**

Library list :  
 IRs Polymer2  
 ATR-Polymer2  
 T-Polymer2  
 Maximum hits: 200  
 Minimum quality : 0  
 Algorithm : DiffDeriv

| Score | Library    | Name  | Comment                                                     |
|-------|------------|-------|-------------------------------------------------------------|
| 595   | T-Polymer2 | Epoxy | Epoxy Resin(Electronic Parts-3)<br>Transmission(Microscope) |

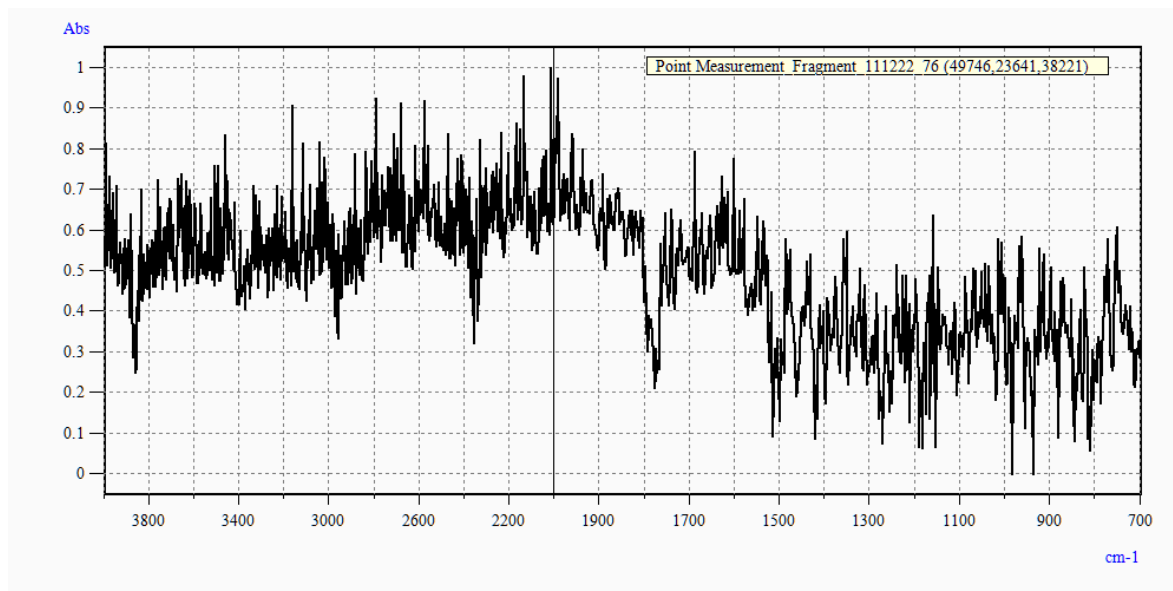

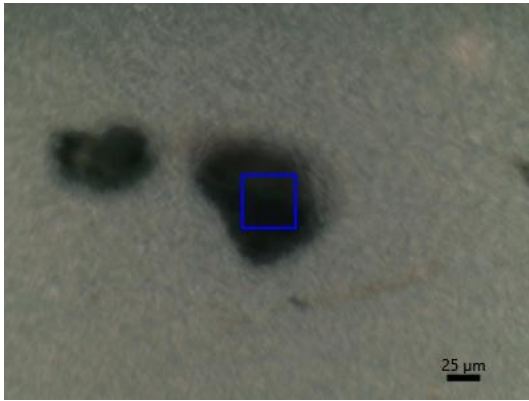

# Search Result Report

Filename : C:\Users\User\Desktop\UTSA samples\UV042821HA48\Point  
 Measurement\_Fragment\_111222\_77.apit  
 Acquired Datetime : 2022/11/12 18:55:06

● **Search Parameters**

Library list :  
 IRs Polymer2  
 ATR-Polymer2  
 T-Polymer2  
 Maximum hits: 200  
 Minimum quality : 0  
 Algorithm : DiffDeriv

| Score | Library    | Name  | Comment                                 |
|-------|------------|-------|-----------------------------------------|
| 628   | T-Polymer2 | Epoxy | Epoxy Resin<br>Transmission(Microscope) |

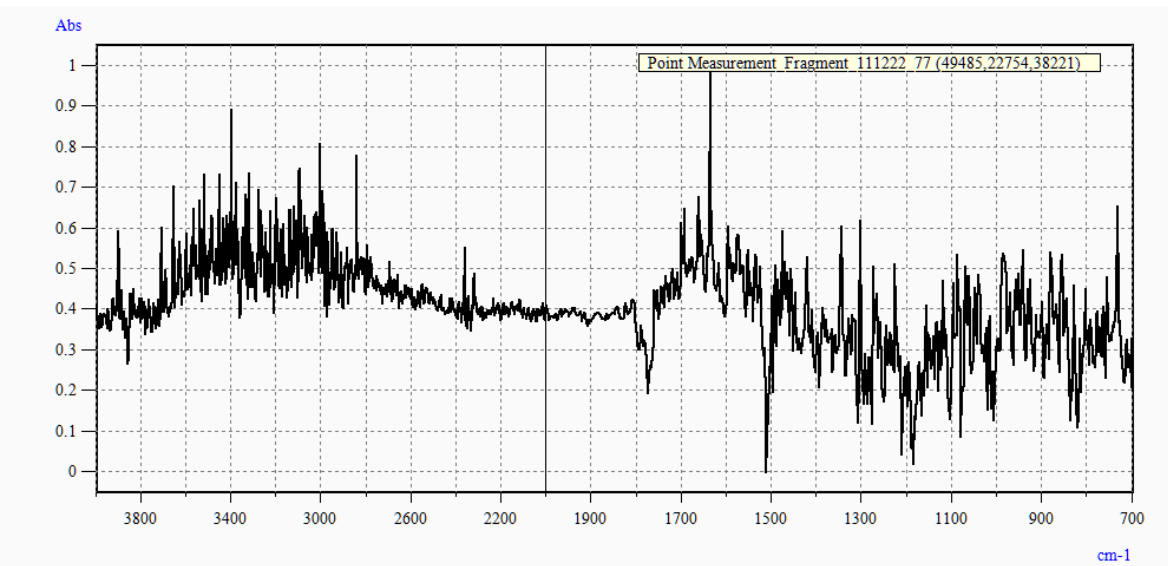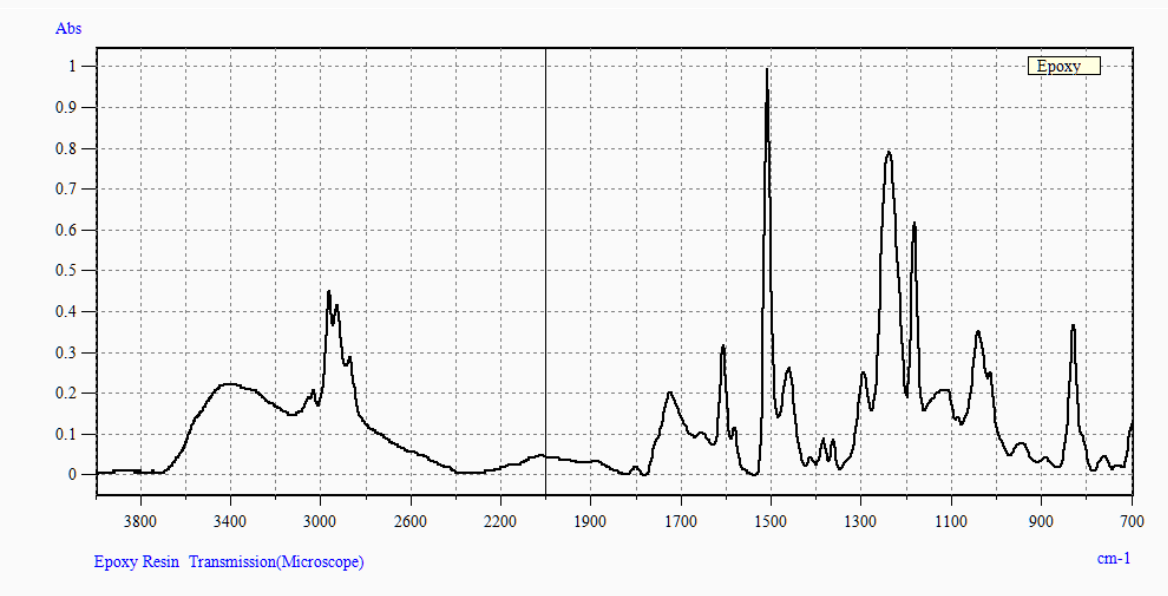

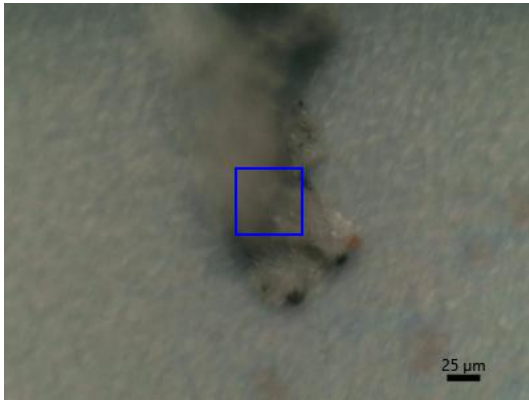

## Search Result Report

Filename : C:\Users\User\Desktop\UTSA samples\UV042821HA48\Point  
 Measurement\_Fragment\_111222\_78.apit  
 Acquired Datetime : 2022/11/12 18:57:42

● **Search Parameters**

Library list :  
 IRs Polymer2  
 ATR-Polymer2  
 T-Polymer2  
 Maximum hits: 200  
 Minimum quality : 0  
 Algorithm : DiffDeriv

| Score | Library      | Name          | Comment                                                                                                                                                                                        |
|-------|--------------|---------------|------------------------------------------------------------------------------------------------------------------------------------------------------------------------------------------------|
| 585   | IRs Polymer2 | IrganoxMD1024 | Irganox MD1024 HINDERED PHENOLIC ANTIOXIDANT-METAL DEACTIVATOR1,2-BIS(3,5-DI-tert-BUTYL-4-HYDROXYHYDROCINNAMOYL)HYDRAZINE; HINDERED PHENOLC34H52O4N2CAS NO. 32687-78-8ATR/diamond ATRcorrected |

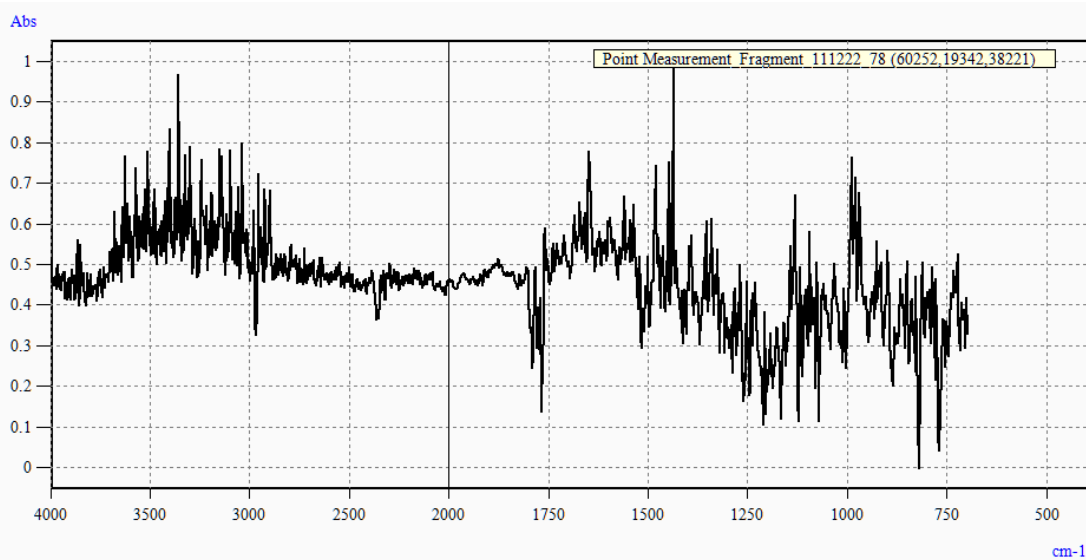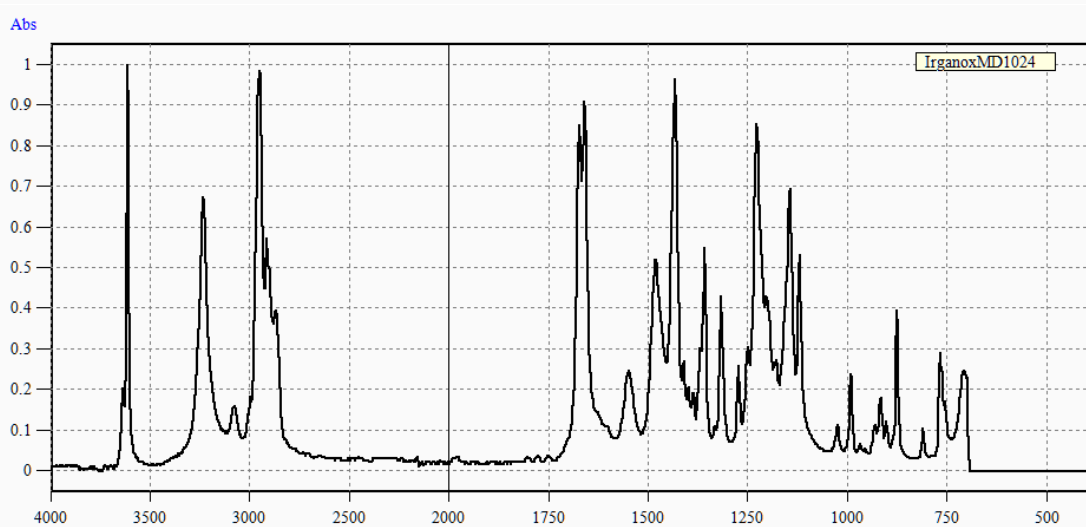

Irganox MD1024 HINDERED PHENOLIC ANTIOXIDANT-METAL DEACTIVATOR 1,2-BIS(3,5-DI-tert-BUTYL-4-HYDROXYHYDROCINNAMYL)HYD

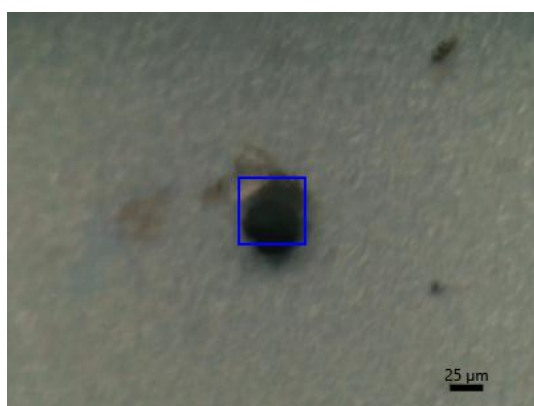

## Search Result Report

Filename : C:\Users\User\Desktop\UTSA samples\UV042821HA48\Point  
 Measurement\_Fragment\_111222\_79.apit  
 Acquired Datetime : 2022/11/12 18:59:16

### ● Search Parameters

Library list :  
 IRs Polymer2  
 ATR-Polymer2  
 T-Polymer2  
 Maximum hits: 200  
 Minimum quality : 0  
 Algorithm : DiffDeriv

| Score | Library      | Name | Comment                          |
|-------|--------------|------|----------------------------------|
| 605   | ATR-Polymer2 | D_PC | Polycarbonate(PC) DuraSamplIR-II |

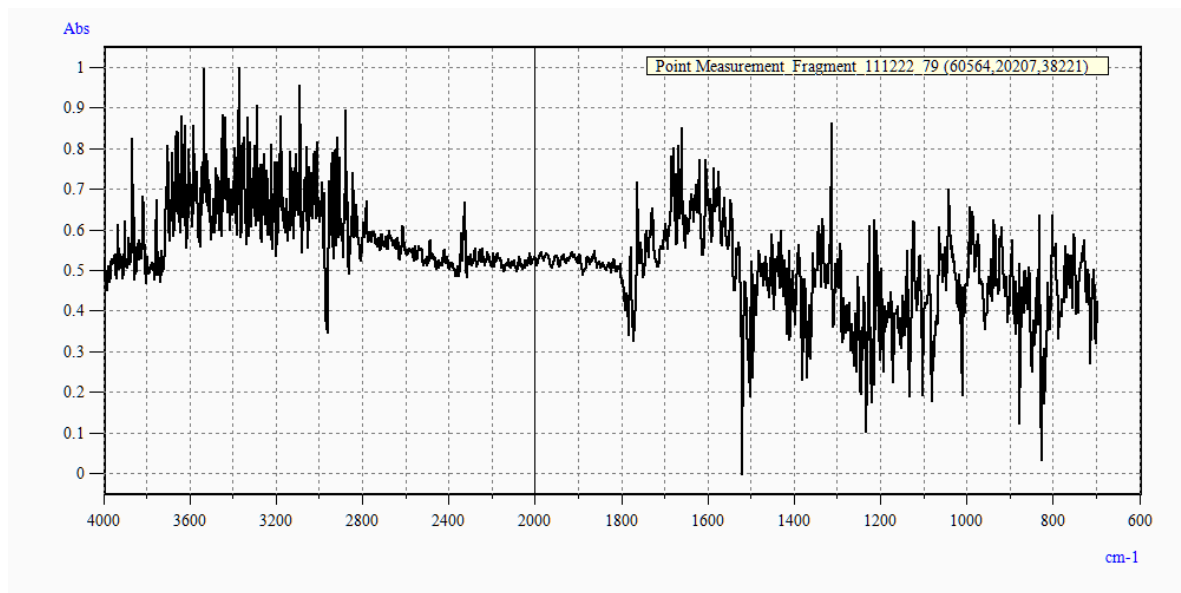

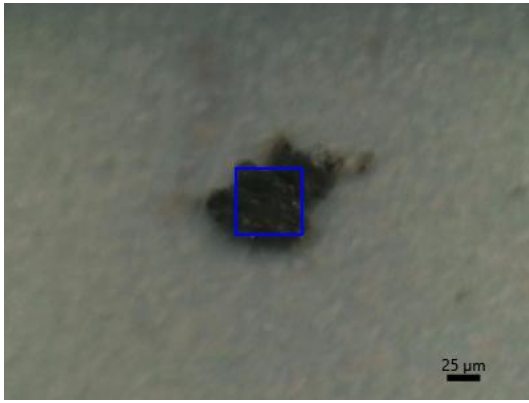

## Search Result Report

Filename : C:\Users\User\Desktop\UTSA samples\UV042821HA48\Point  
 Measurement\_Fragment\_111222\_80.apit  
 Acquired Datetime : 2022/11/12 19:00:56

### ● Search Parameters

Library list :  
 IRs Polymer2  
 ATR-Polymer2  
 T-Polymer2  
 Maximum hits: 200  
 Minimum quality : 0  
 Algorithm : DiffDeriv

| Score | Library      | Name               | Comment                                                                             |
|-------|--------------|--------------------|-------------------------------------------------------------------------------------|
| 591   | ATR-Polymer2 | D_PVC_Carboxylated | Poly(Vinyl Chloride)(PVC),<br>Carboxylated(Carboxyl content<br>1.8%) DuraSamplIR-II |

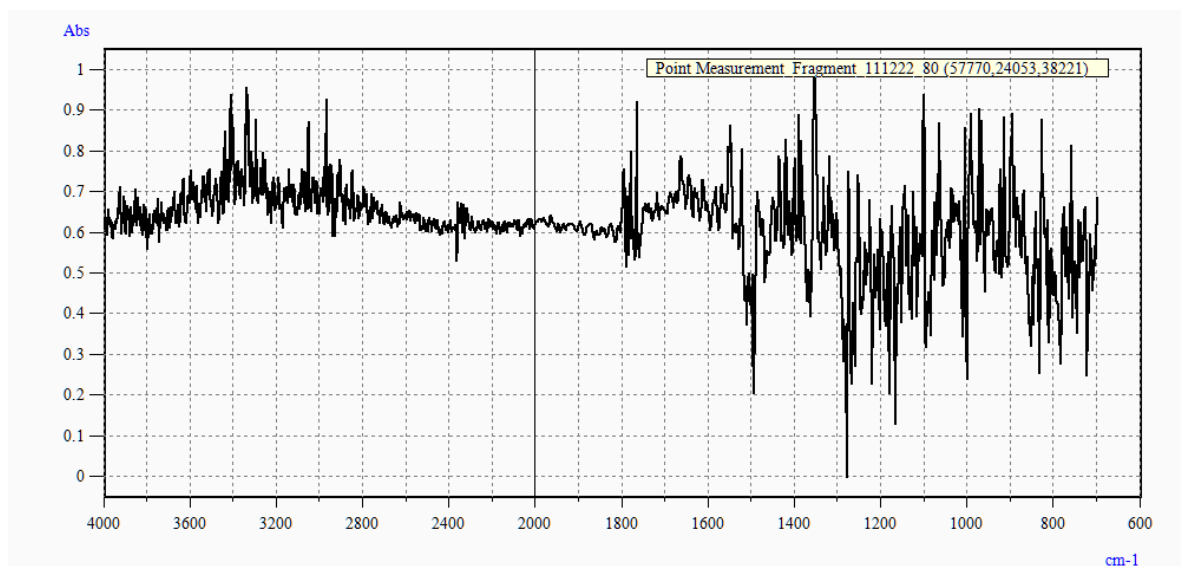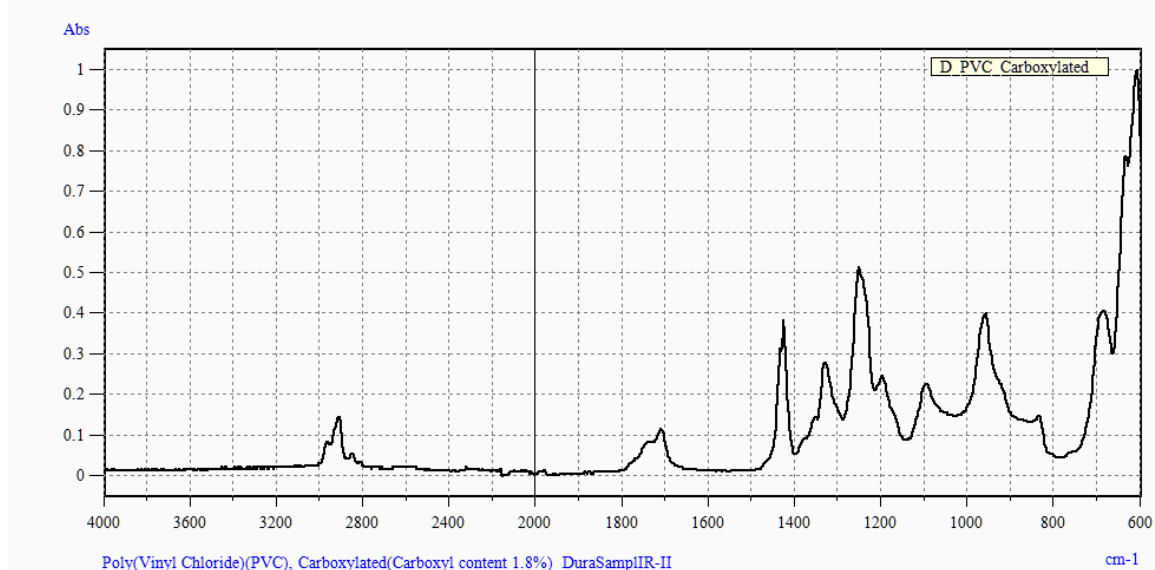

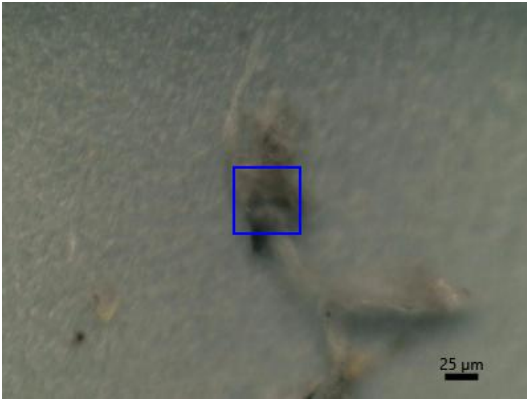

## Search Result Report

Filename : C:\Users\User\Desktop\UTSA samples\UV042821HA48\Point  
 Measurement\_Fragment\_111222\_81.apit  
 Acquired Datetime : 2022/11/12 19:04:15

### ● Search Parameters

Library list :  
 IRs Polymer2  
 ATR-Polymer2  
 T-Polymer2  
 Maximum hits: 200  
 Minimum quality : 0  
 Algorithm : DiffDeriv

| Score | Library      | Name    | Comment                                                              |
|-------|--------------|---------|----------------------------------------------------------------------|
| 687   | IRs Polymer2 | NYLON11 | Nylon 11 [-NH(CH <sub>2</sub> ) <sub>10</sub> CO-] <sub>n</sub> Film |

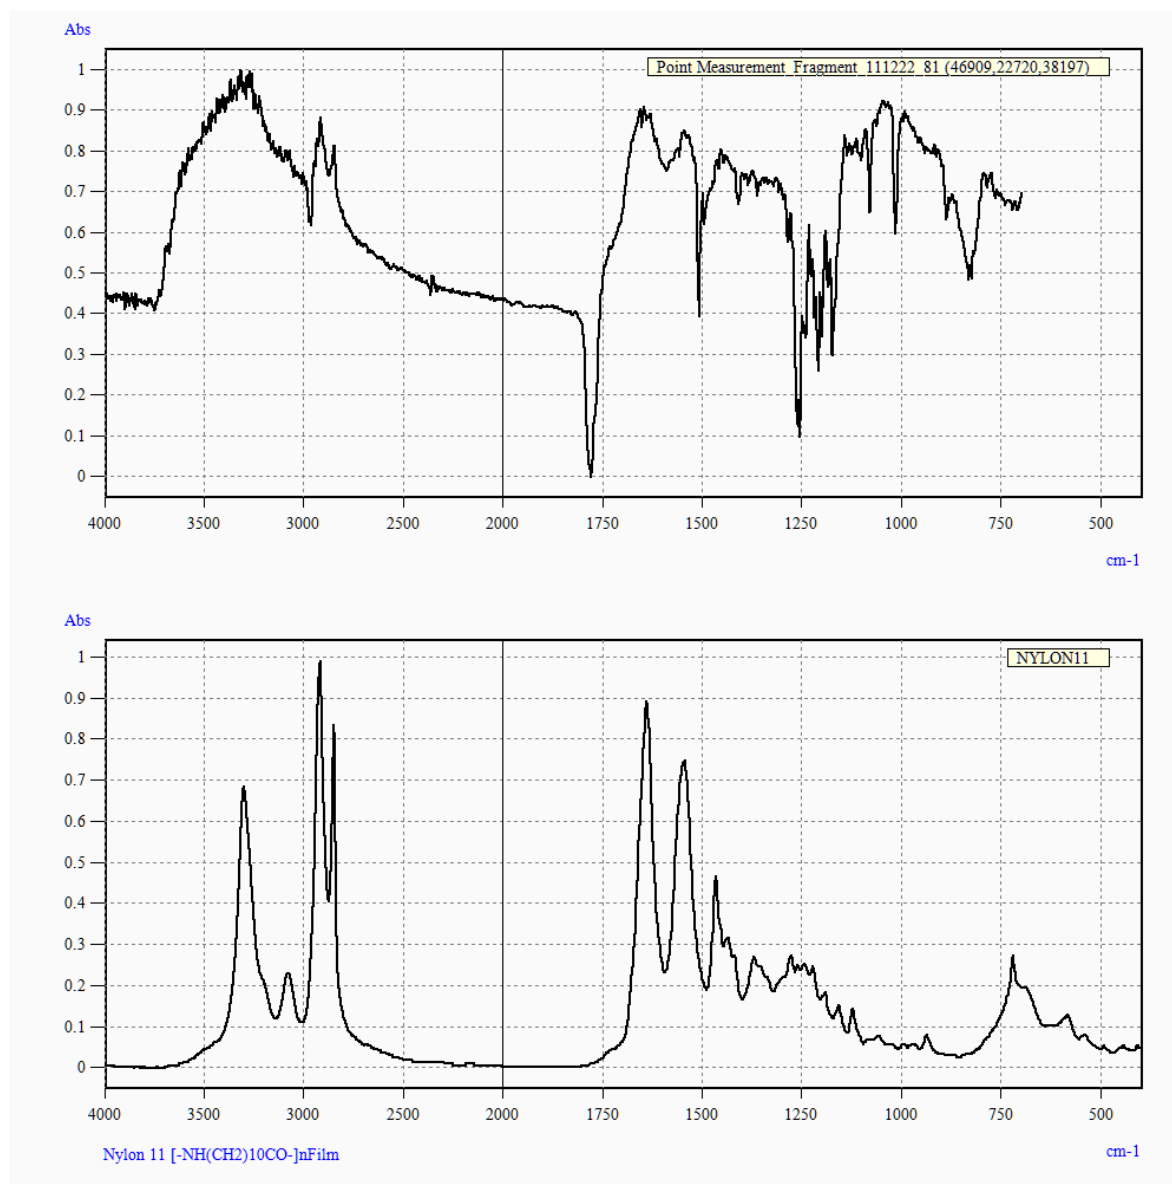

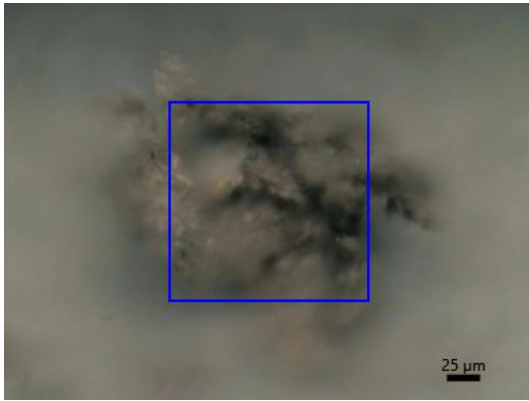

## Search Result Report

Filename : C:\Users\User\Desktop\UTSA samples\UV042821HA48\Point  
 Measurement\_Fragment\_111222\_82.apit  
 Acquired Datetime : 2022/11/12 19:07:57

### ● Search Parameters

Library list :  
 IRs Polymer2  
 ATR-Polymer2  
 T-Polymer2  
 Maximum hits: 200  
 Minimum quality : 0  
 Algorithm : DiffDeriv

| Score | Library    | Name                             | Comment                                                                                   |
|-------|------------|----------------------------------|-------------------------------------------------------------------------------------------|
| 617   | T-Polymer2 | T_PVC with PhenoricSulfonicEster | Polyvinylchloride with Phenolic ester of aliphatic sulfonic acid Transmission(Microscope) |

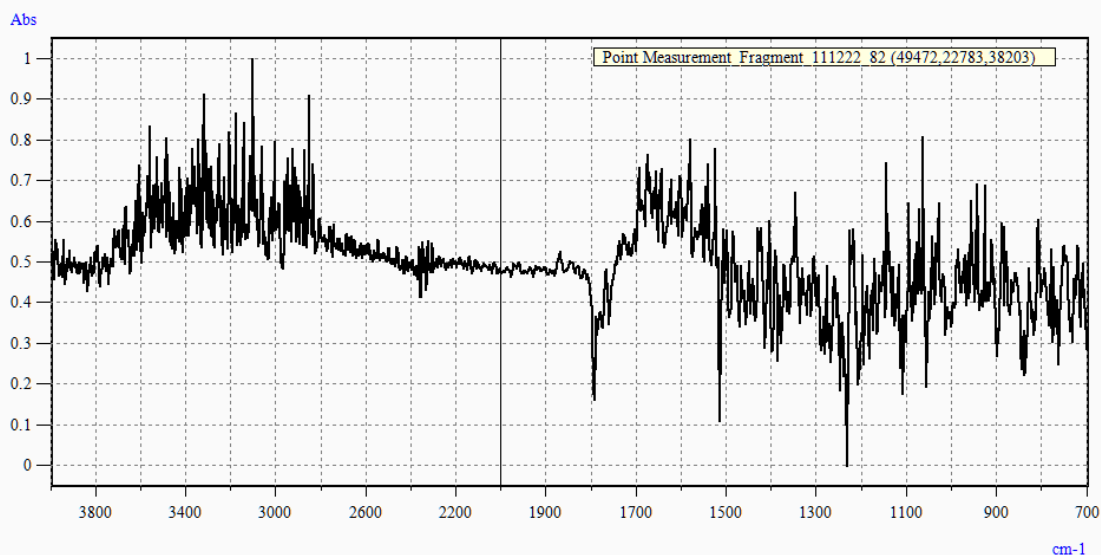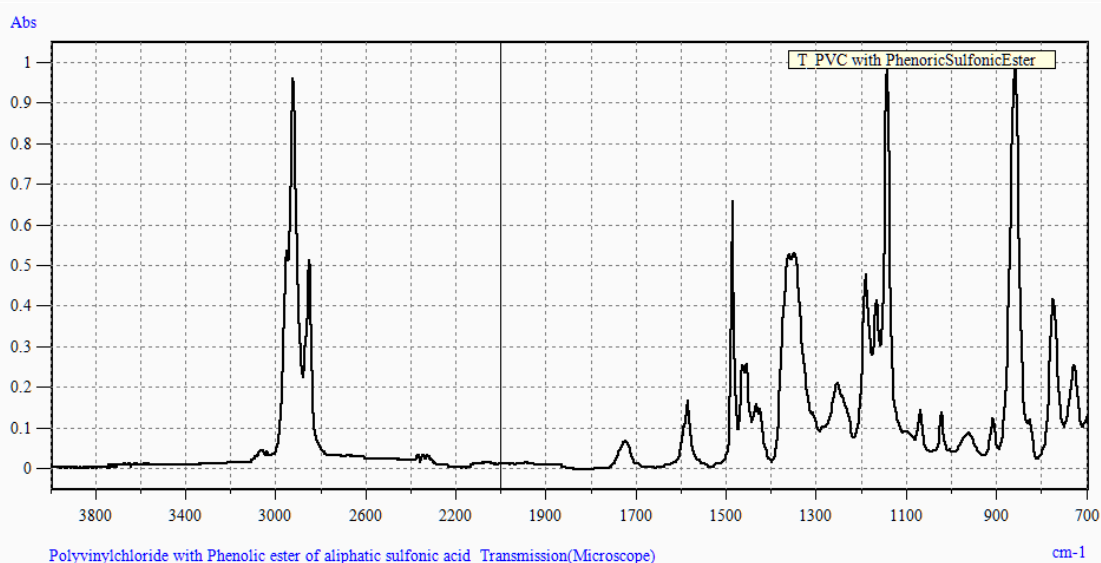

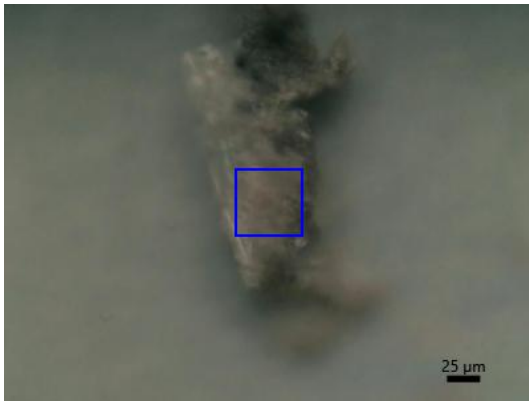

# Search Result Report

Filename : C:\Users\User\Desktop\UTSA samples\UV042821HA48\Point  
 Measurement\_Fragment\_111222\_83.apit  
 Acquired Datetime : 2022/11/12 19:11:05

● **Search Parameters**

Library list :  
 IRs Polymer2  
 ATR-Polymer2  
 T-Polymer2  
 Maximum hits: 200  
 Minimum quality : 0  
 Algorithm : DiffDeriv

| Score | Library    | Name | Comment                                       |
|-------|------------|------|-----------------------------------------------|
| 593   | T-Polymer2 | PC   | Polycarbonate(PC)<br>Transmission(Microscope) |

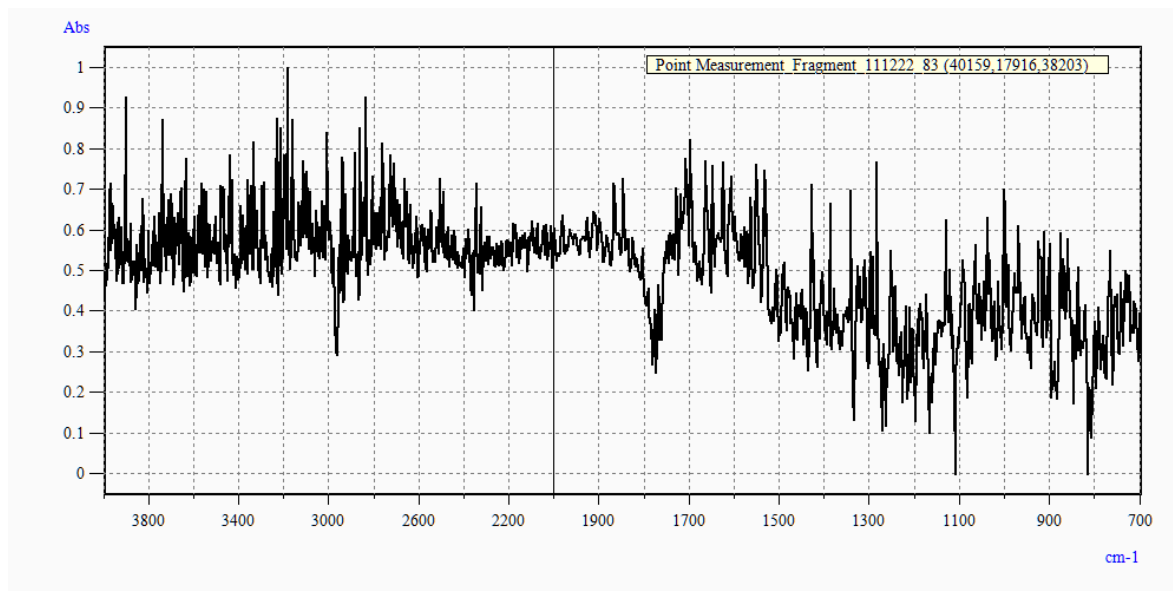

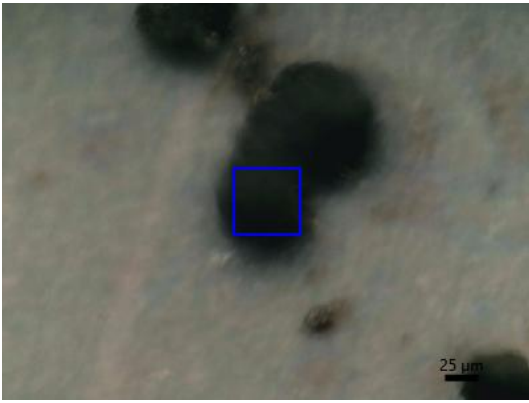

## Search Result Report

Filename : C:\Users\User\Desktop\UTSA samples\UV042821HA48\Point  
 Measurement\_Fragment\_111222\_84.apit  
 Acquired Datetime : 2022/11/12 19:18:55

### ● Search Parameters

Library list :  
 IRs Polymer2  
 ATR-Polymer2  
 T-Polymer2  
 Maximum hits: 200  
 Minimum quality : 0  
 Algorithm : DiffDeriv

| Score | Library      | Name   | Comment                                      |
|-------|--------------|--------|----------------------------------------------|
| 570   | ATR-Polymer2 | D_PEEK | Polyetheretherketone(PEEK)<br>DuraSamplIR-II |

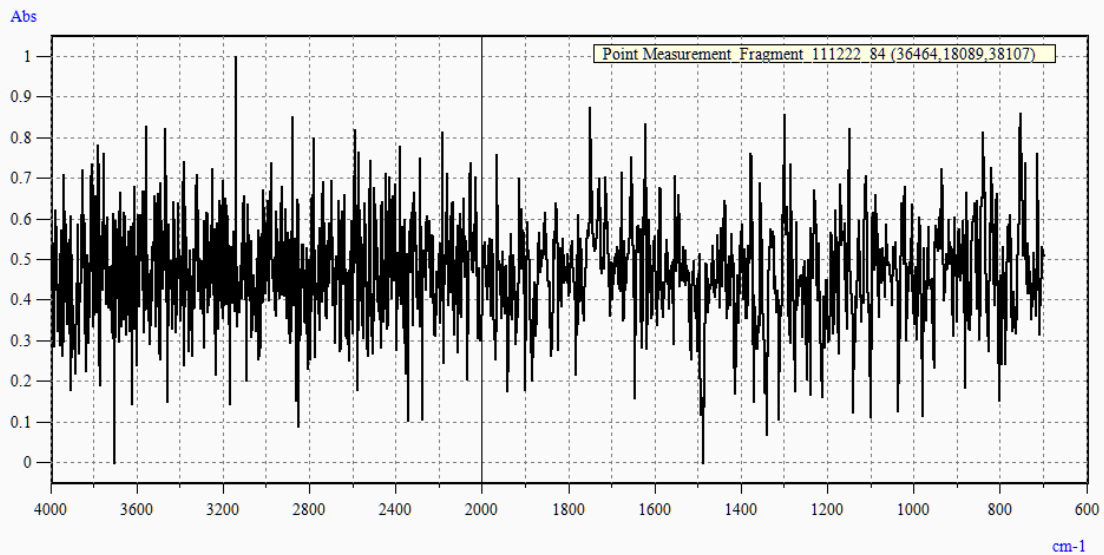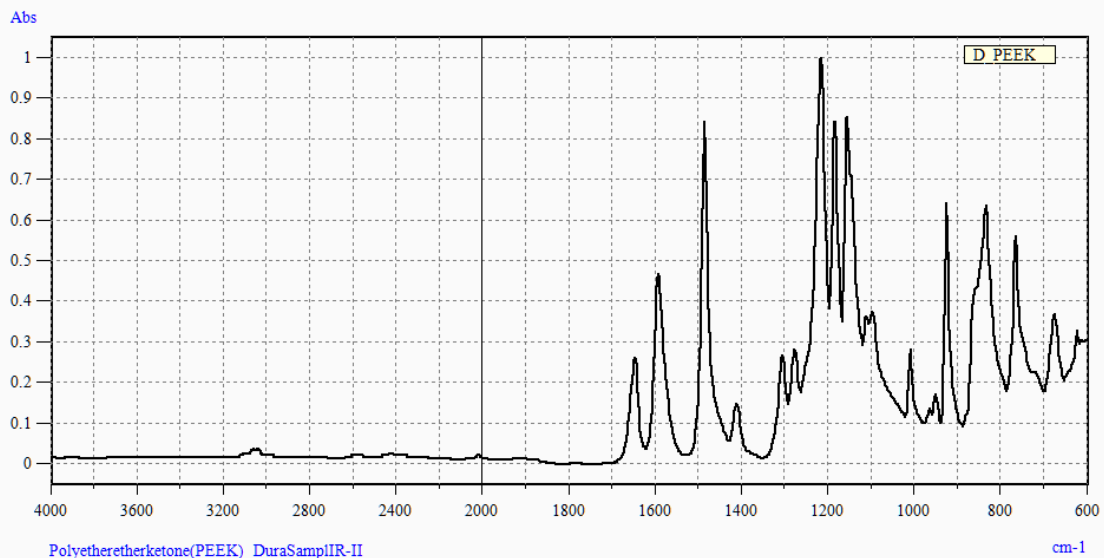

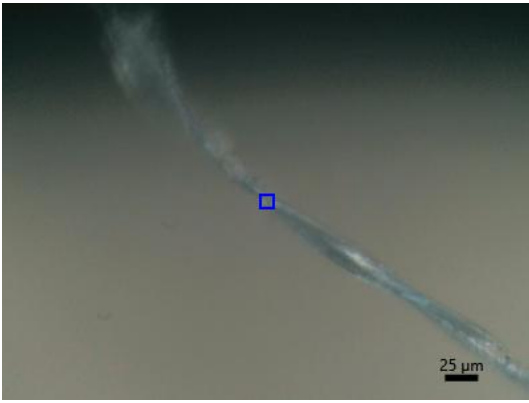

# Search Result Report

Filename : C:\Users\User\Desktop\UTSA samples\UV042821HA48\Point  
 Measurement\_Fragment\_111222\_85.apit  
 Acquired Datetime : 2022/11/12 19:25:10

● **Search Parameters**

Library list : IRs Polymer2  
 ATR-Polymer2  
 T-Polymer2  
 Maximum hits: 200  
 Minimum quality : 0  
 Algorithm : DiffDeriv

| Score | Library      | Name | Comment                      |
|-------|--------------|------|------------------------------|
| 787   | IRs Polymer2 | LDPE | Low Density PolyethyleneFilm |

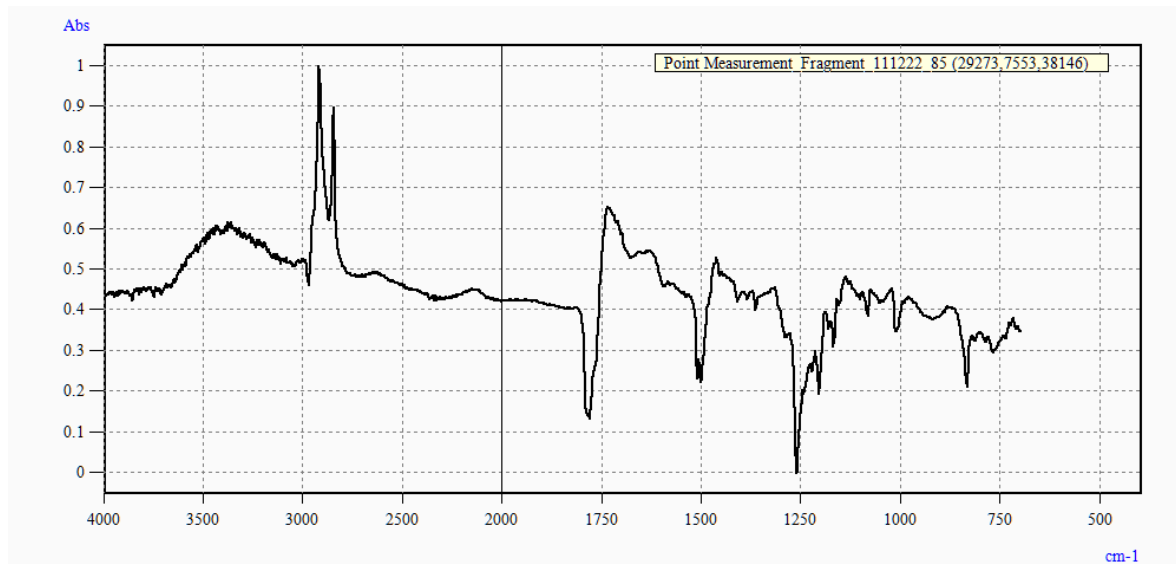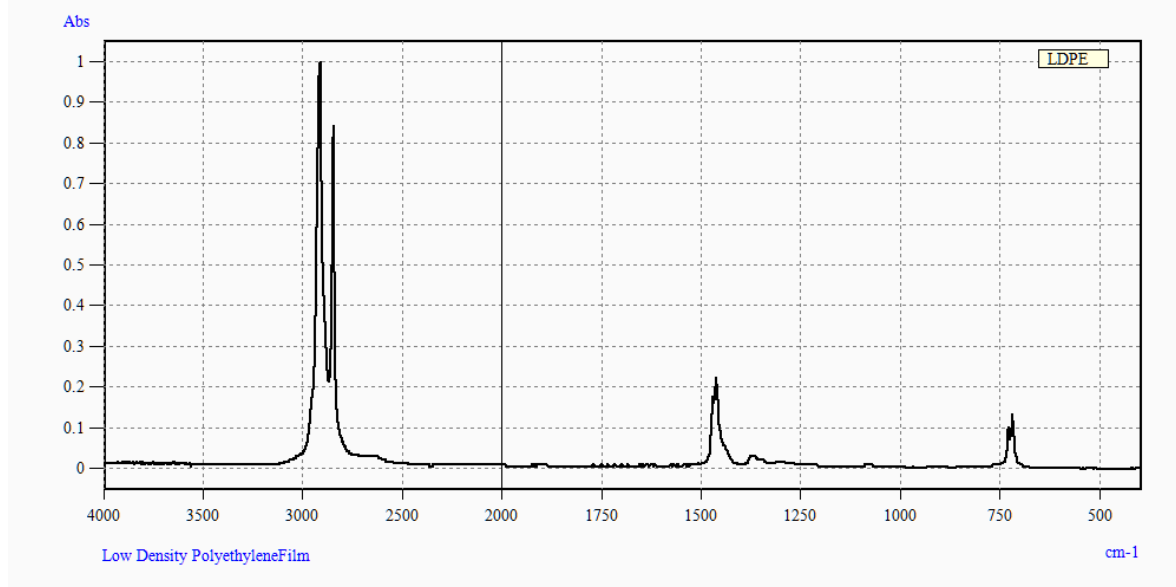

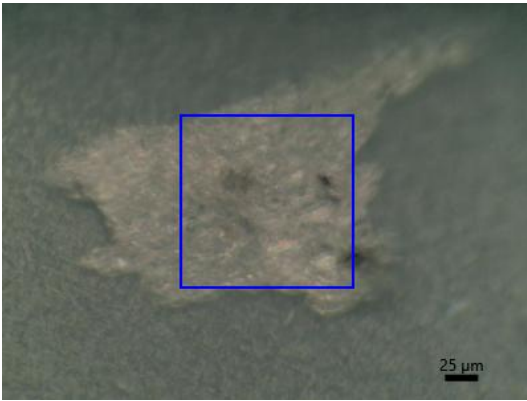

## Search Result Report

Filename : C:\Users\User\Desktop\UTSA samples\UV042821HA48\Point  
 Measurement\_Fragment\_111222\_86.apit  
 Acquired Datetime : 2022/11/12 19:28:36

### ● Search Parameters

Library list :  
 IRs Polymer2  
 ATR-Polymer2  
 T-Polymer2  
 Maximum hits: 200  
 Minimum quality : 0  
 Algorithm : DiffDeriv

| Score | Library    | Name | Comment                                      |
|-------|------------|------|----------------------------------------------|
| 603   | T-Polymer2 | PAR  | Polyarylate(PAR)<br>Transmission(Microscope) |

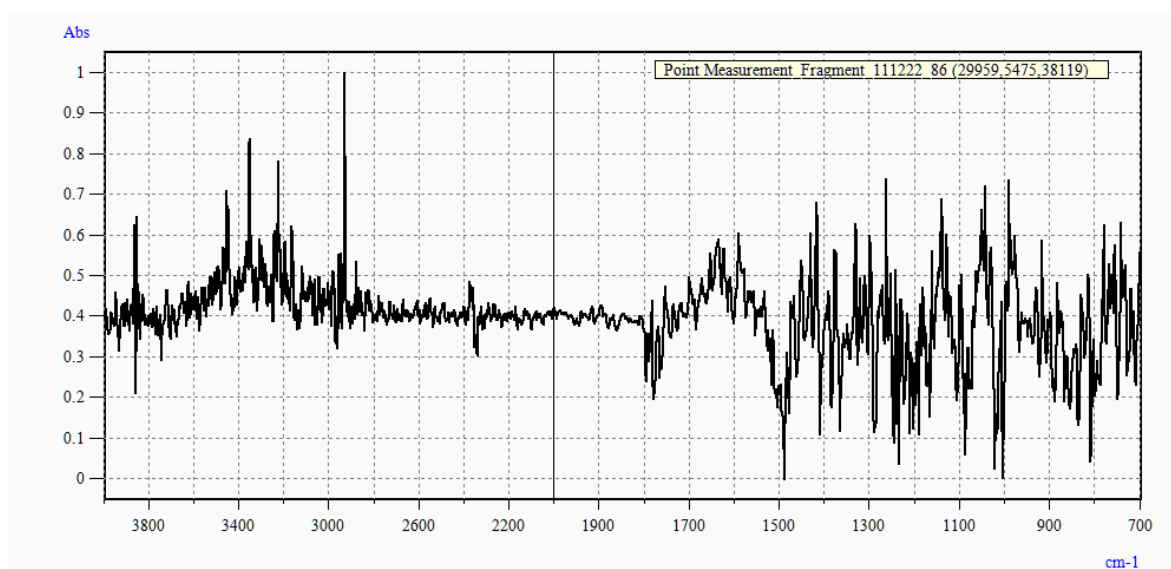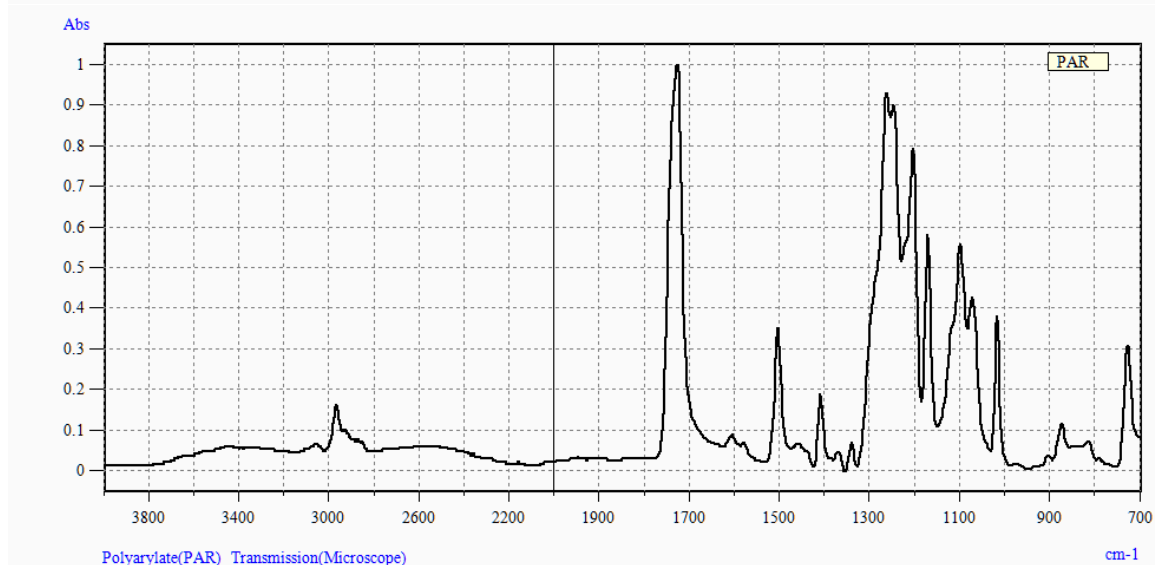

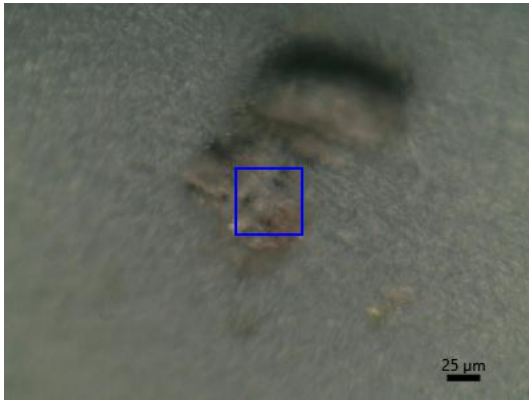

# Search Result Report

Filename : C:\Users\User\Desktop\UTSA samples\UV042821HA48\Point  
 Measurement\_Fragment\_111222\_87.apit  
 Acquired Datetime : 2022/11/12 19:32:32

● **Search Parameters**

Library list :  
 IRs Polymer2  
 ATR-Polymer2  
 T-Polymer2  
 Maximum hits: 200  
 Minimum quality : 0  
 Algorithm : DiffDeriv

| Score | Library    | Name  | Comment                                 |
|-------|------------|-------|-----------------------------------------|
| 599   | T-Polymer2 | Epoxy | Epoxy Resin<br>Transmission(Microscope) |

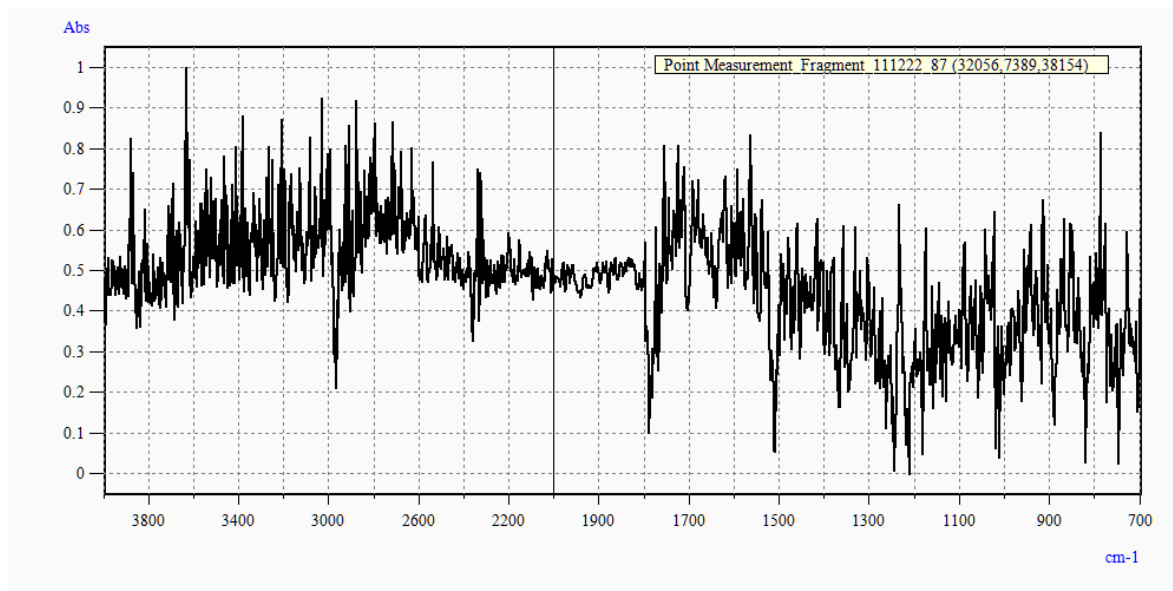

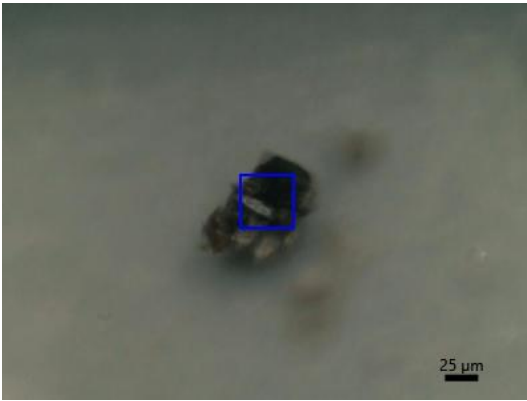

## Search Result Report

Filename : C:\Users\User\Desktop\UTSA samples\UV042821HA48\Point  
 Measurement\_Fragment\_111222\_88.apit  
 Acquired Datetime : 2022/11/12 19:39:41

### ● Search Parameters

Library list :  
 IRs Polymer2  
 ATR-Polymer2  
 T-Polymer2  
 Maximum hits: 200  
 Minimum quality : 0  
 Algorithm : DiffDeriv

| Score | Library      | Name | Comment                          |
|-------|--------------|------|----------------------------------|
| 617   | ATR-Polymer2 | D_PC | Polycarbonate(PC) DuraSamplIR-II |

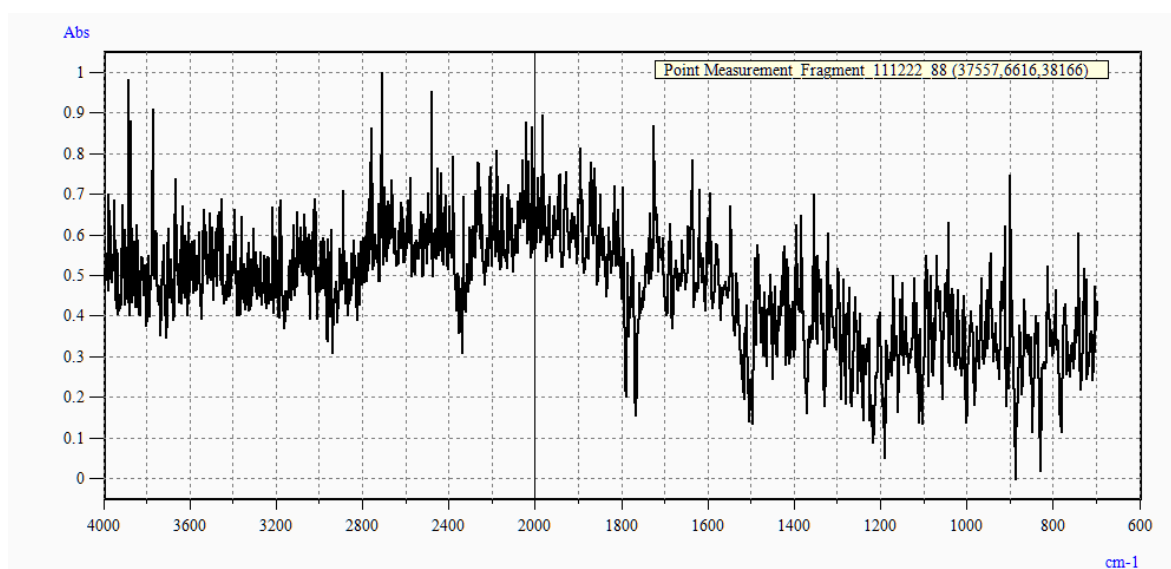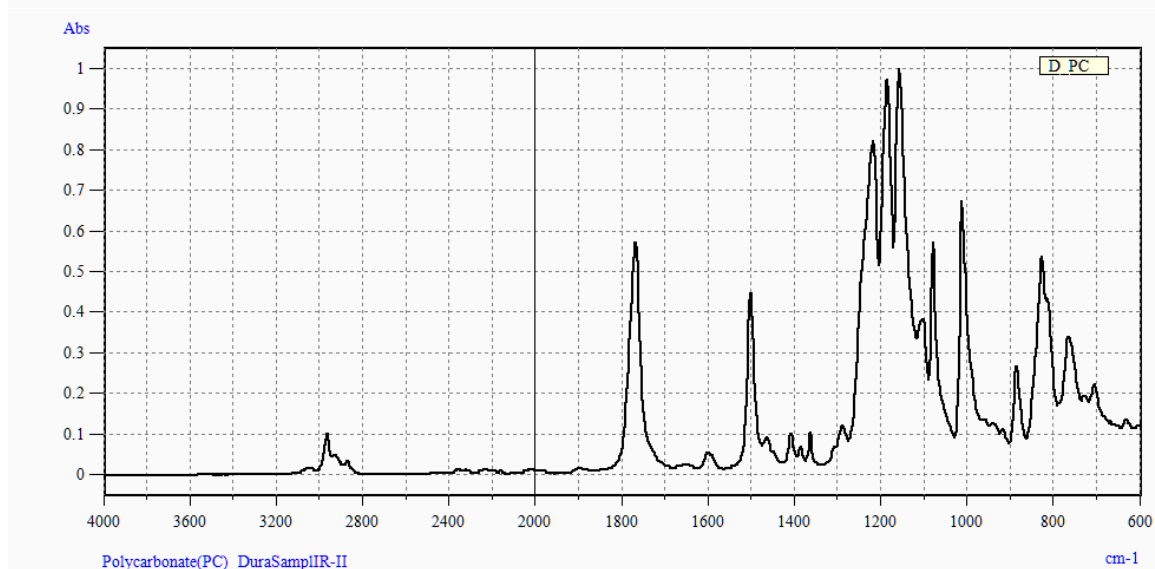

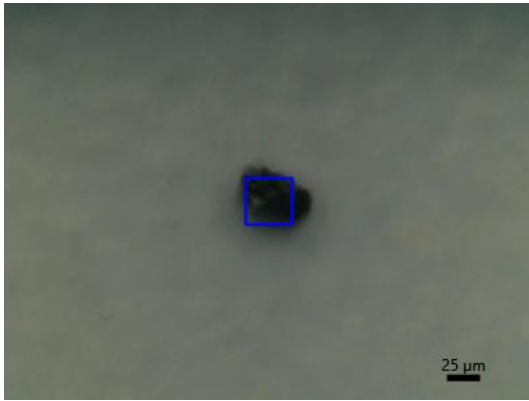

## Search Result Report

Filename : C:\Users\User\Desktop\UTSA samples\UV042821HA48\Point  
 Measurement\_Fragment\_111222\_89.apit  
 Acquired Datetime : 2022/11/12 19:45:15

### ● Search Parameters

Library list :  
 IRs Polymer2  
 ATR-Polymer2  
 T-Polymer2  
 Maximum hits: 200  
 Minimum quality : 0  
 Algorithm : DiffDeriv

| Score | Library    | Name          | Comment                                   |
|-------|------------|---------------|-------------------------------------------|
| 681   | T-Polymer2 | Polyacetylene | Polyacetylene<br>Transmission(Microscope) |

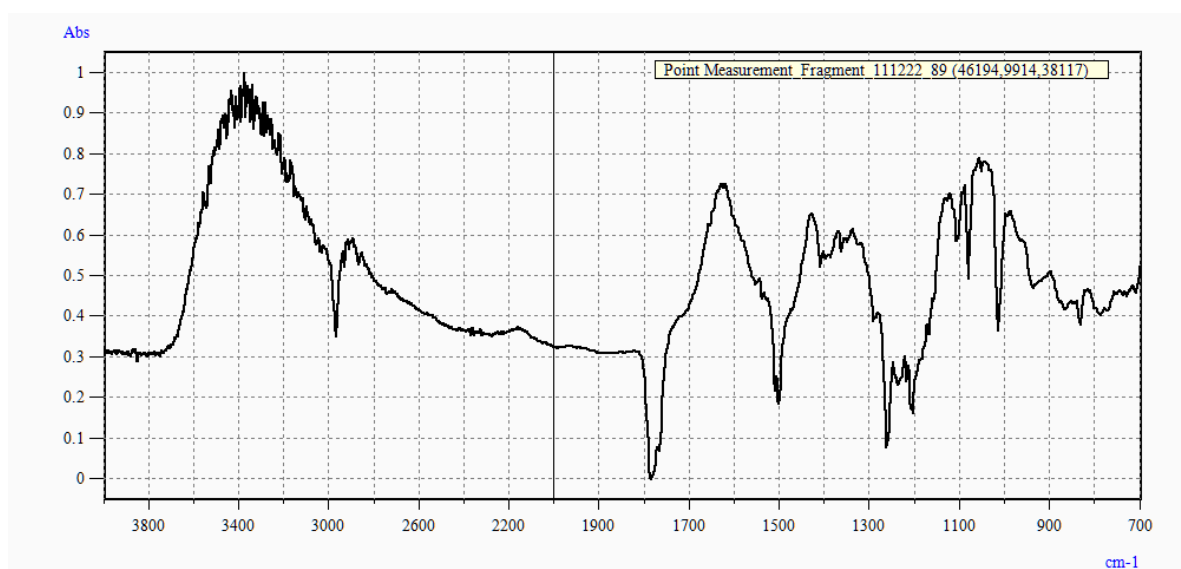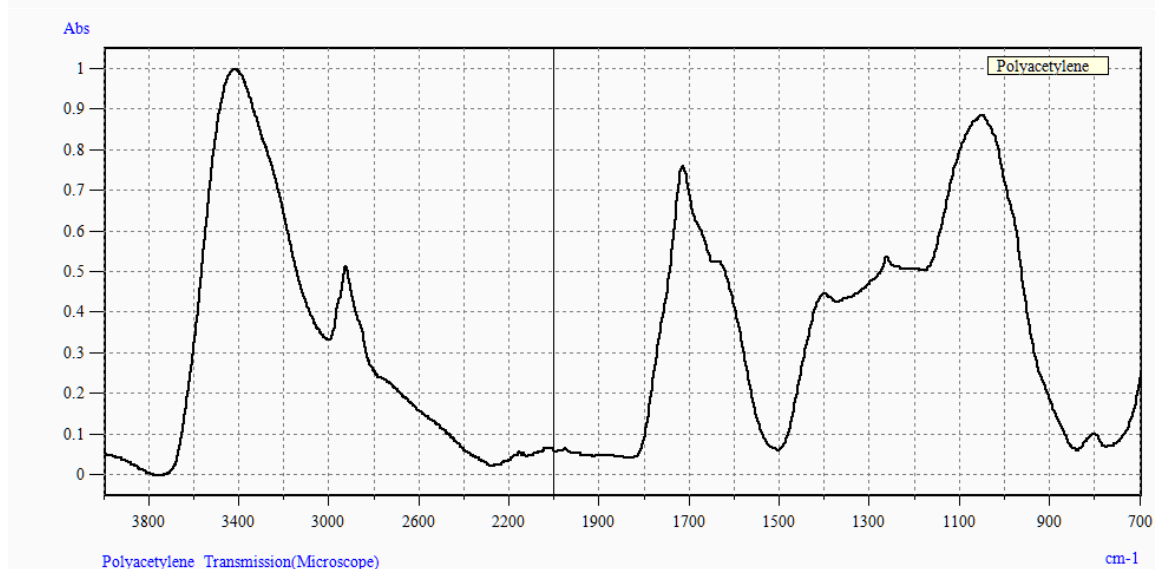

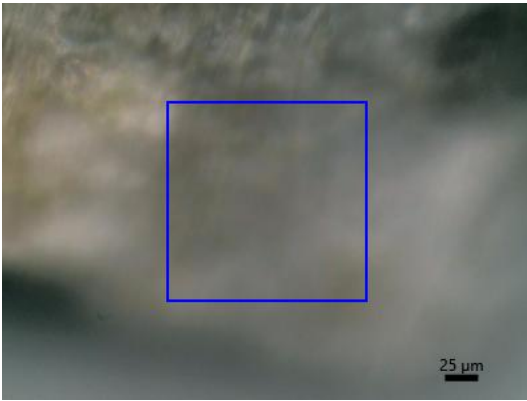

## Search Result Report

Filename : C:\Users\User\Desktop\UTSA samples\UV042821HA48\Point  
 Measurement\_Fragment\_111222\_90.apit  
 Acquired Datetime : 2022/11/12 19:50:31

### ● Search Parameters

Library list :  
 IRs Polymer2  
 ATR-Polymer2  
 T-Polymer2  
 Maximum hits: 200  
 Minimum quality : 0  
 Algorithm : DiffDeriv

| Score | Library    | Name | Comment                                                     |
|-------|------------|------|-------------------------------------------------------------|
| 577   | T-Polymer2 | PBT  | Polybutylene Terephthalate(PBT)<br>Transmission(Microscope) |

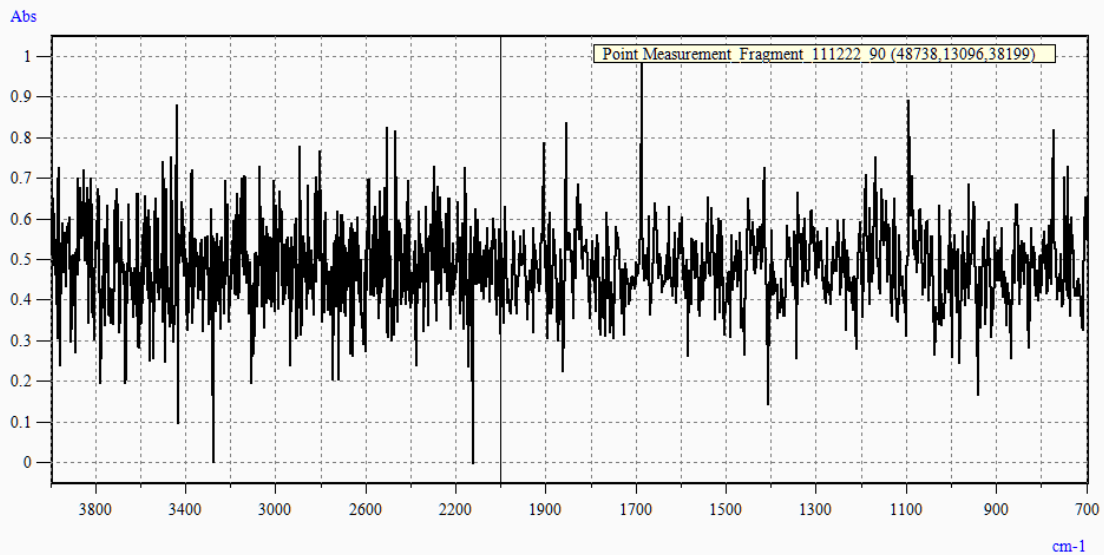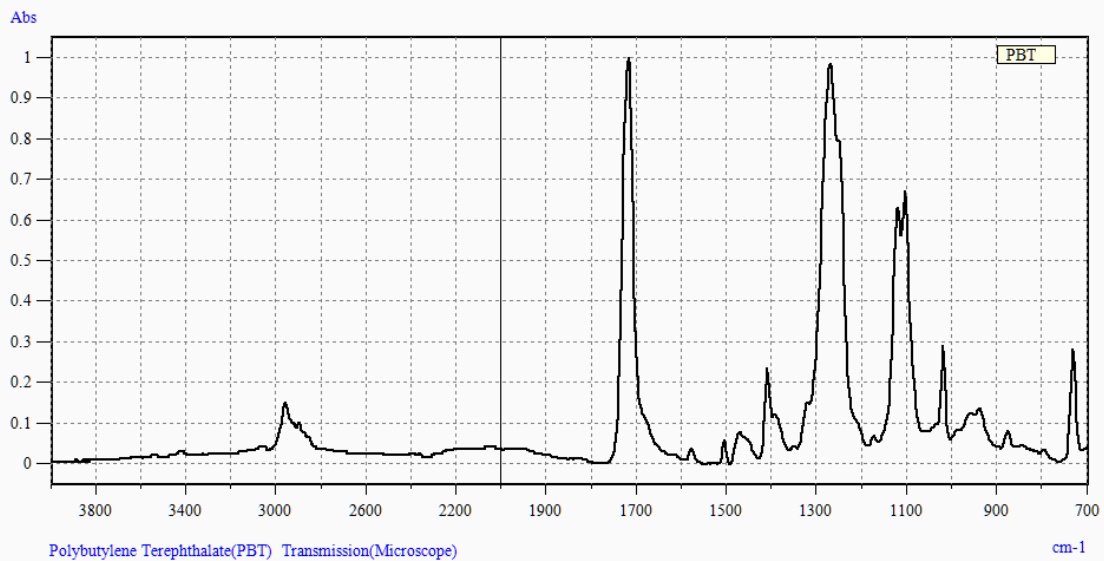

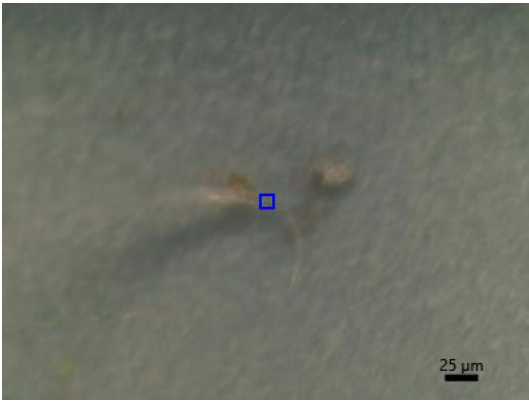

## Search Result Report

Filename : C:\Users\User\Desktop\UTSA  
 samples\UV042821HA52\Point\_measurement\_Fragment\_111322\_18.apit  
 Acquired Datetime : 2022/11/13 11:35:09

### ● Search Parameters

Library list :  
 IRs Polymer2  
 ATR-Polymer2  
 T-Polymer2  
 Maximum hits: 200  
 Minimum quality : 0  
 Algorithm : DiffDeriv

| Score | Library    | Name | Comment                                       |
|-------|------------|------|-----------------------------------------------|
| 640   | T-Polymer2 | PC   | Polycarbonate(PC)<br>Transmission(Microscope) |

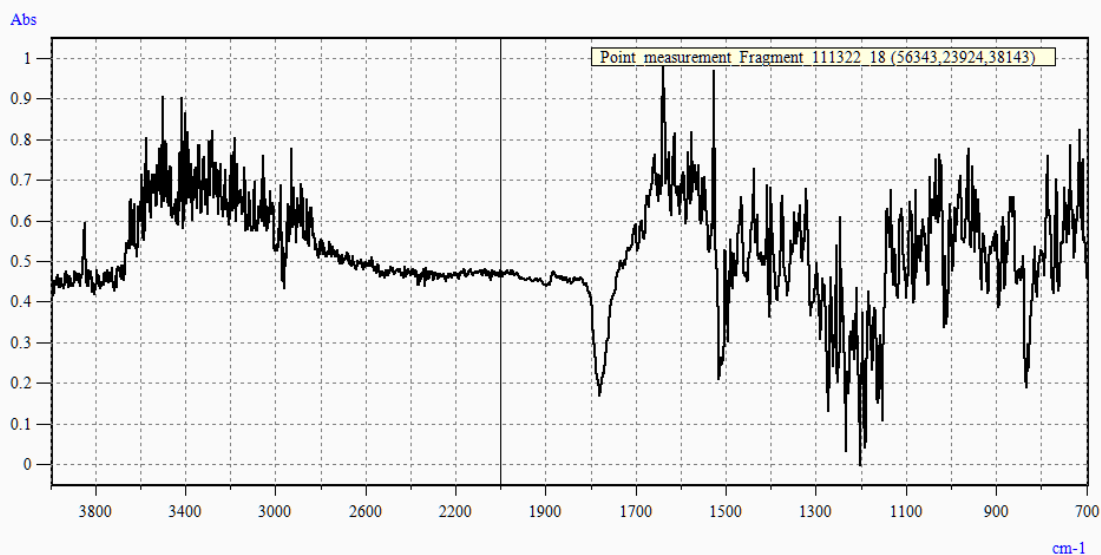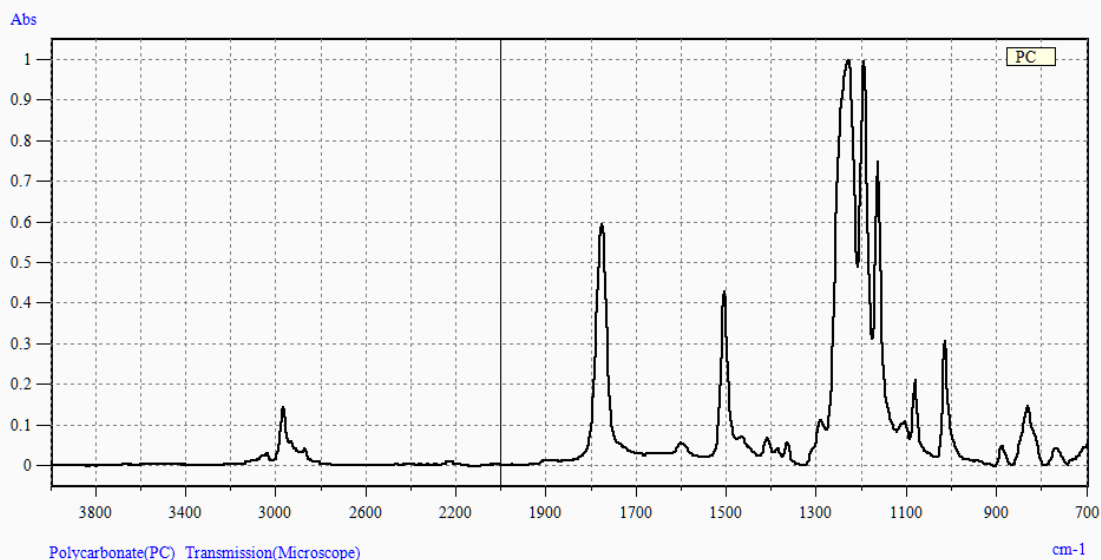

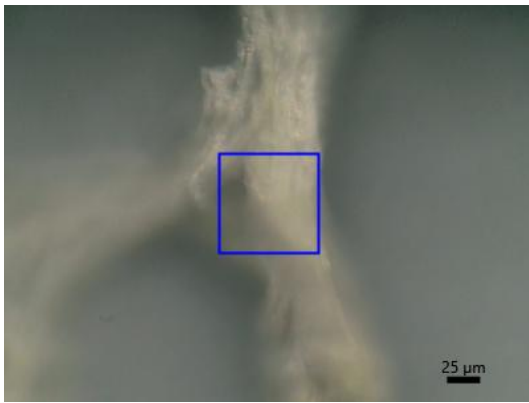

# Search Result Report

Filename : C:\Users\User\Desktop\UTSA samples\UV042821HA52\Point\_measurement\_Fragment\_111322\_19.apit  
 Acquired Datetime : 2022/11/13 11:40:11

● **Search Parameters**

Library list : IRs Polymer2  
 ATR-Polymer2  
 T-Polymer2  
 Maximum hits: 200  
 Minimum quality : 0  
 Algorithm : DiffDeriv

| Score | Library      | Name | Comment                                                             |
|-------|--------------|------|---------------------------------------------------------------------|
| 590   | IRs Polymer2 | FEP  | FEP,Tetrafluoroethylene HexafluoropropyleneATR/diamond ATRcorrected |

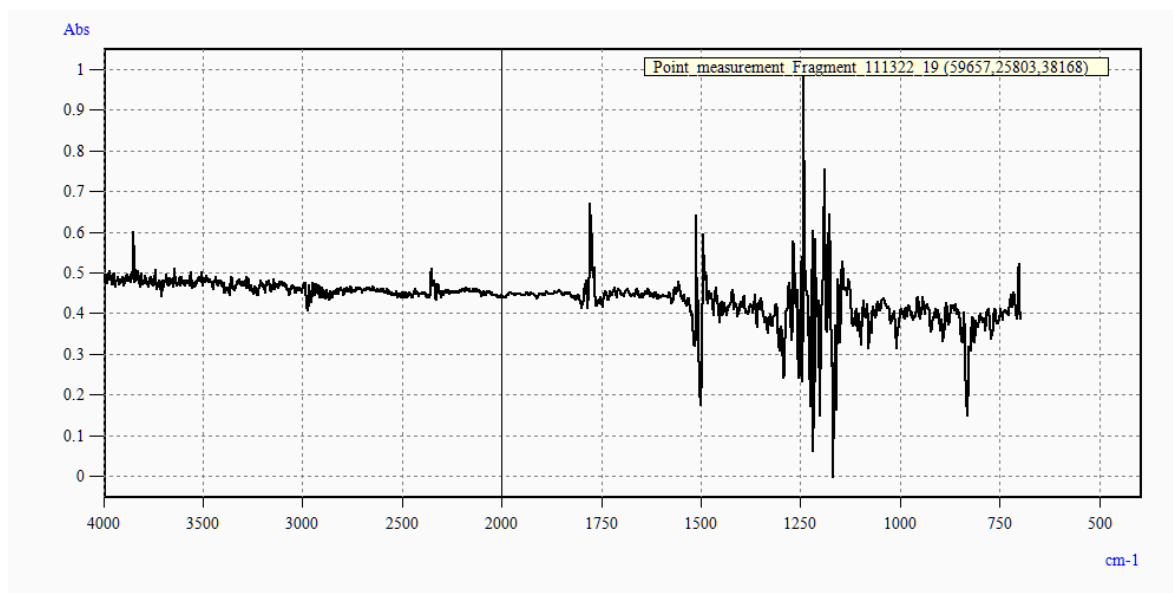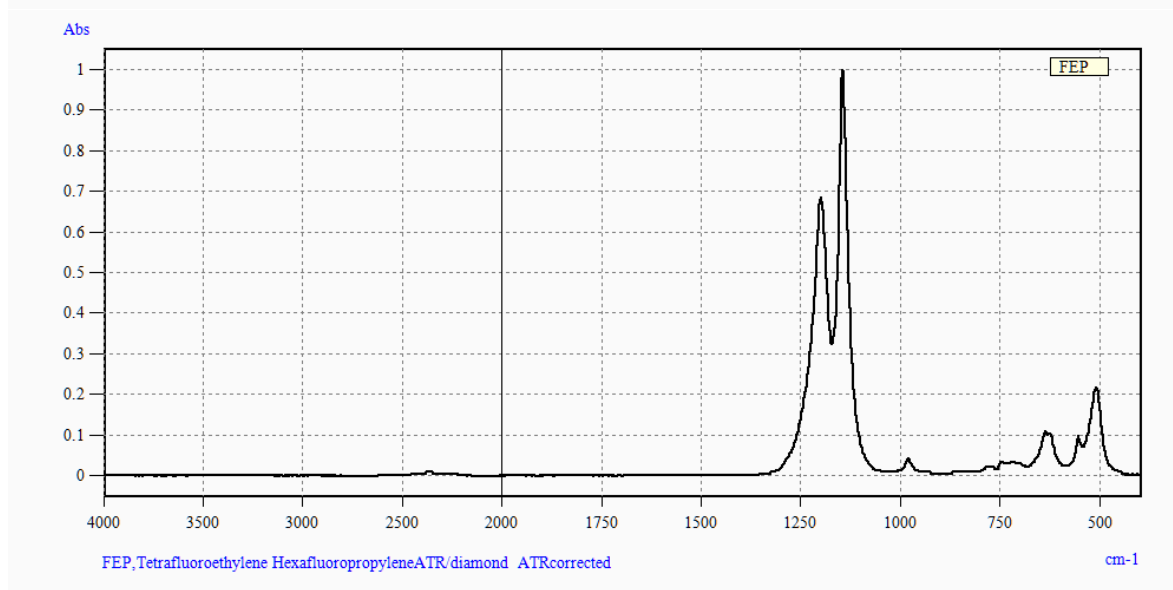

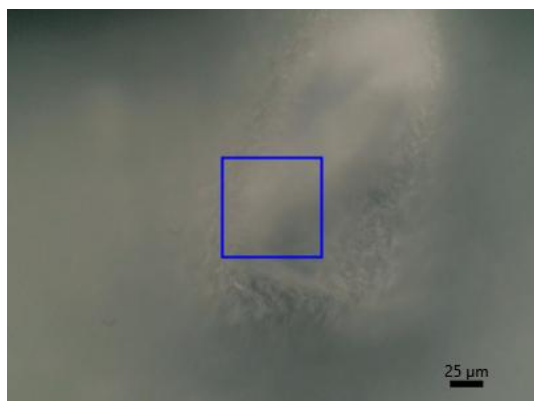

## Search Result Report

Filename : C:\Users\User\Desktop\UTSA  
 samples\UV042821HA52\Point\_measurement\_Fragment\_111322\_20.apit  
 Acquired Datetime : 2022/11/13 11:44:36

### ● Search Parameters

Library list :  
 IRs Polymer2  
 ATR-Polymer2  
 T-Polymer2  
 Maximum hits: 200  
 Minimum quality : 0  
 Algorithm : DiffDeriv

| Score | Library    | Name | Comment                                       |
|-------|------------|------|-----------------------------------------------|
| 710   | T-Polymer2 | PC   | Polycarbonate(PC)<br>Transmission(Microscope) |

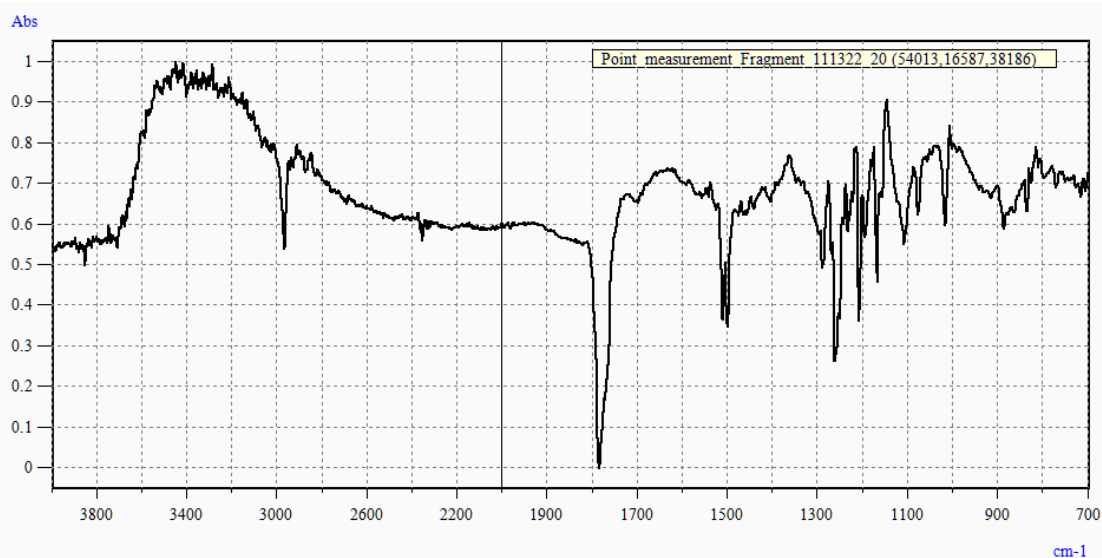

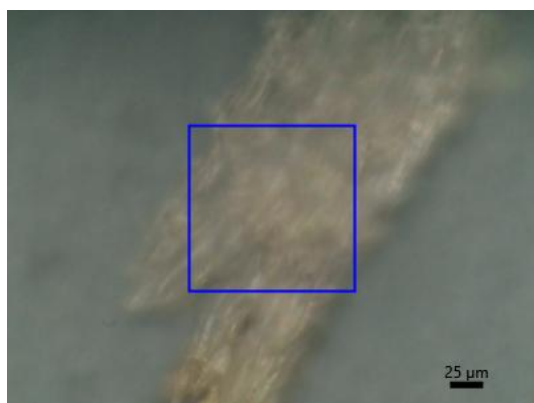

# Search Result Report

Filename : C:\Users\User\Desktop\UTSA samples\UV042821HA52\Point\_measurement\_Fragment\_111322\_21.apit

Acquired Datetime : 2022/11/13 11:47:30

● **Search Parameters**

Library list : Polymer2  
 IRs ATR-Polymer2  
 T-Polymer2  
 Maximum hits: 200  
 Minimum quality : 0  
 Algorithm : DiffDeriv

| Score | Library      | Name     | Comment                    |
|-------|--------------|----------|----------------------------|
| 637   | ATR-Polymer2 | D_Epoxy5 | Epoxy Resin DuraSamplIR-II |

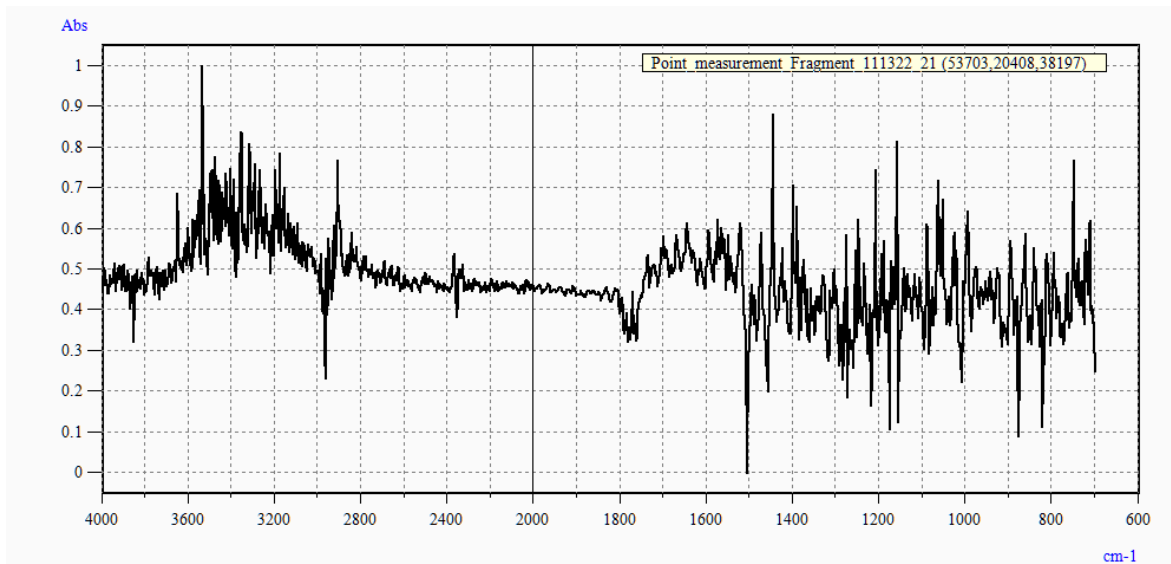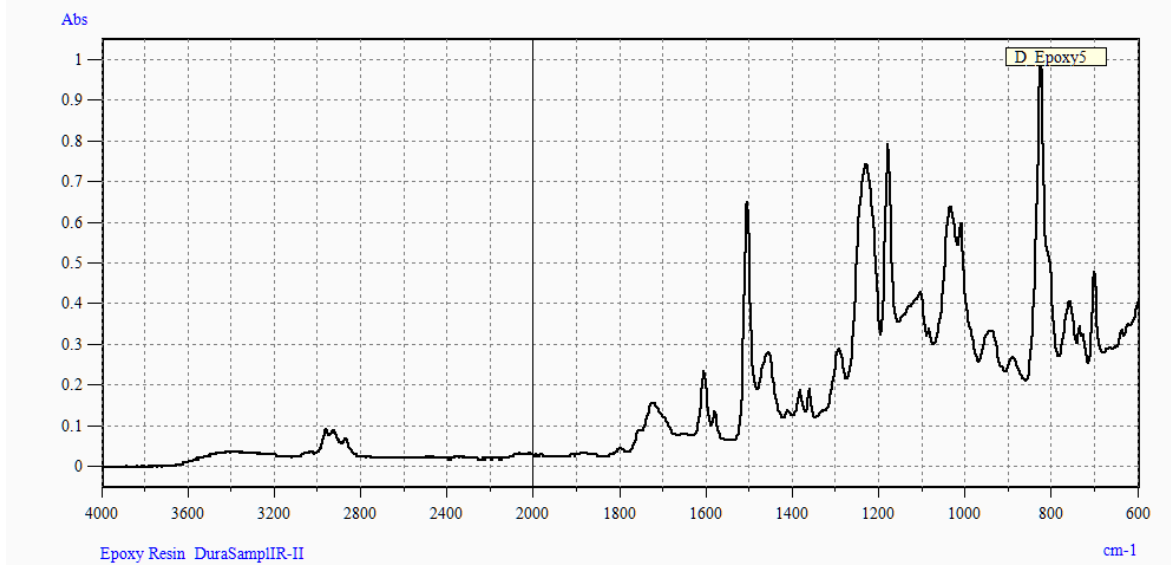

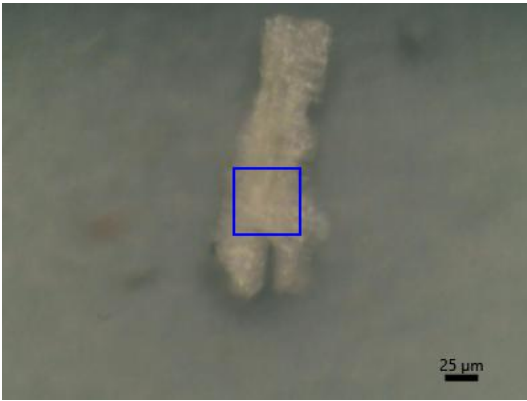

## Search Result Report

Filename : C:\Users\User\Desktop\UTSA  
 samples\UV042821HA52\Point\_measurement\_Fragment\_111322\_22.apit  
 Acquired Datetime : 2022/11/13 11:53:36

### ● Search Parameters

Library list :  
 IRs Polymer2  
 ATR-Polymer2  
 T-Polymer2  
 Maximum hits: 200  
 Minimum quality : 0  
 Algorithm : DiffDeriv

| Score | Library      | Name | Comment              |
|-------|--------------|------|----------------------|
| 590   | IRs Polymer2 | PI1  | Polyimide KAPTONFilm |

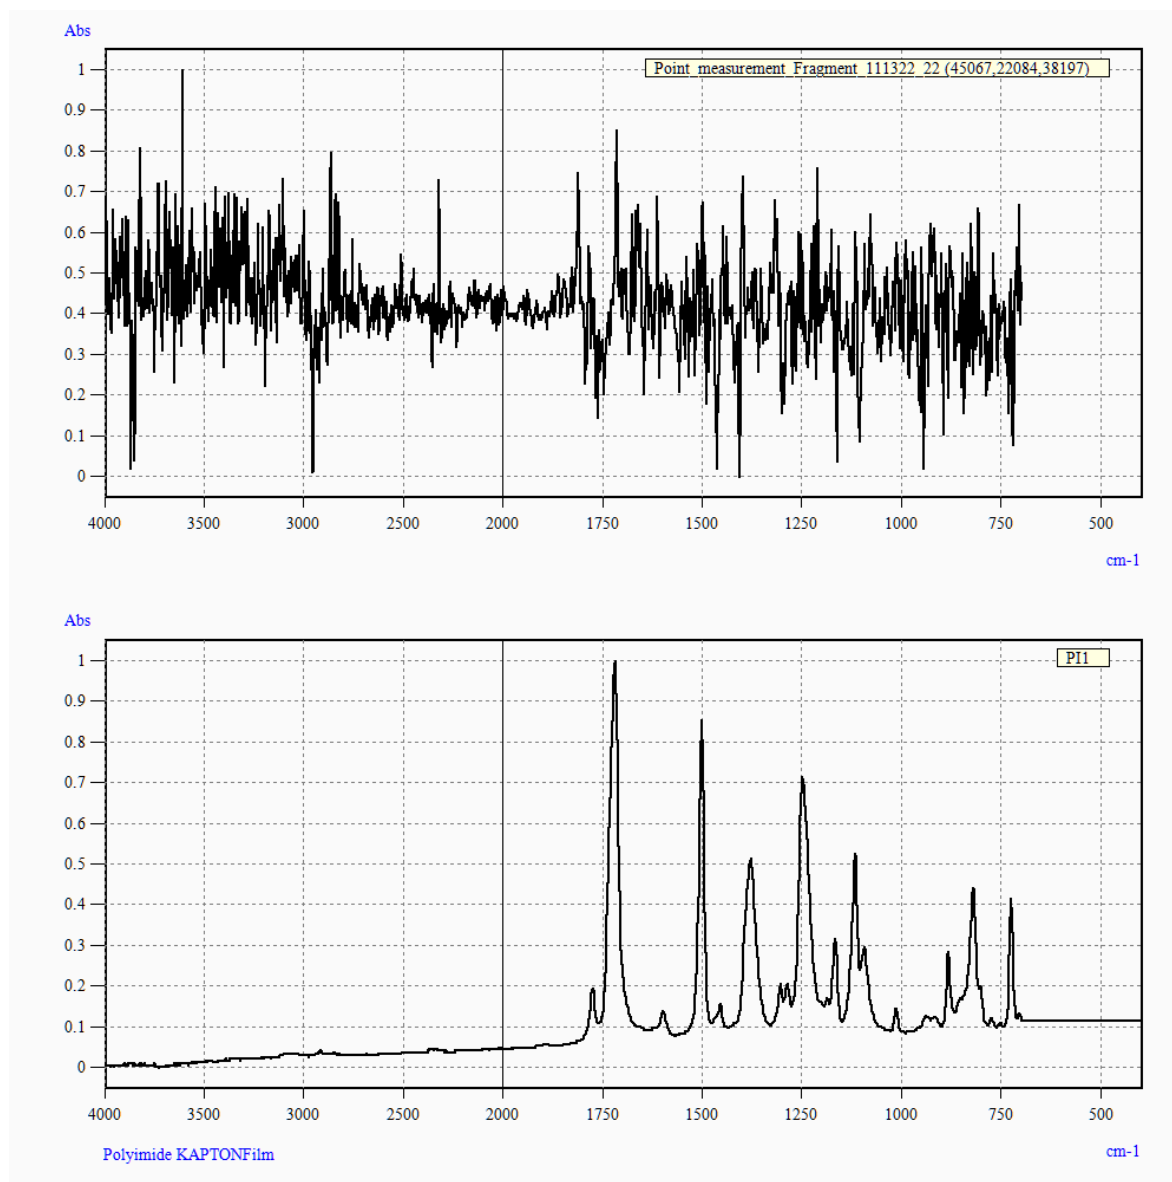

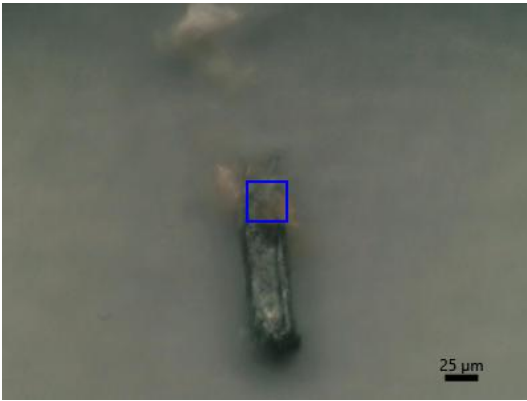

## Search Result Report

Filename : C:\Users\User\Desktop\UTSA  
 samples\UV042821HA52\Point\_measurement\_Fragment\_111322\_23.apit  
 Acquired Datetime : 2022/11/13 11:56:02

### ● Search Parameters

Library list :  
 IRs Polymer2  
 ATR-Polymer2  
 T-Polymer2  
 Maximum hits: 200  
 Minimum quality : 0  
 Algorithm : DiffDeriv

| Score | Library      | Name                      | Comment                                    |
|-------|--------------|---------------------------|--------------------------------------------|
| 596   | ATR-Polymer2 | D_Poly_4_Methyl_1_Pentene | Poly(4-Methyl-1 Pentene)<br>DuraSamplIR-II |

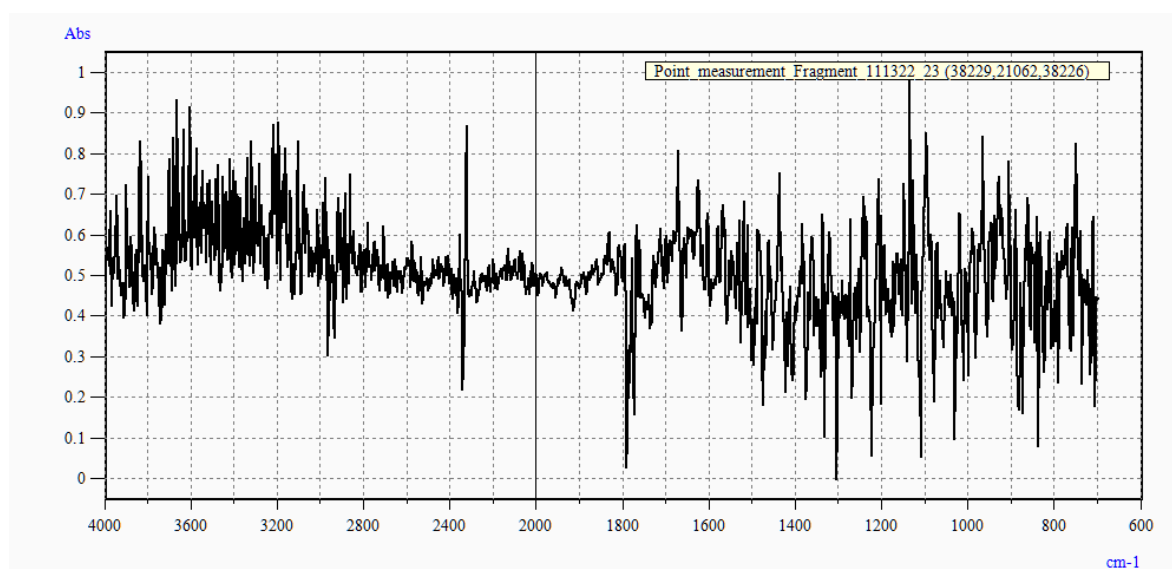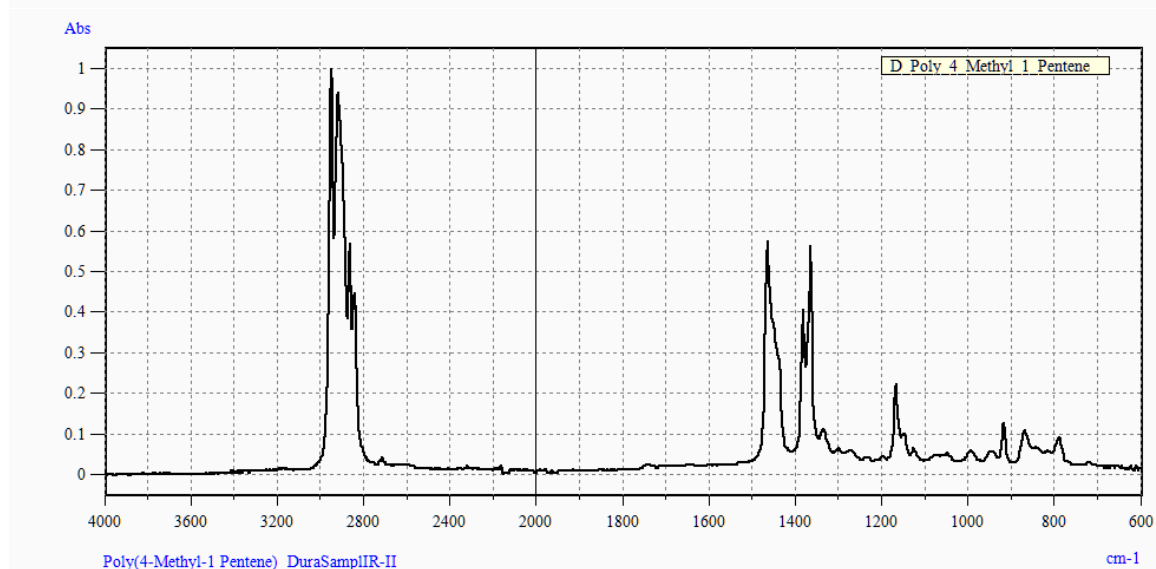

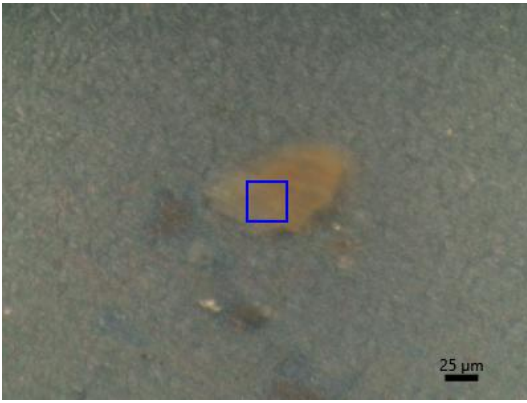

## Search Result Report

Filename : C:\Users\User\Desktop\UTSA  
 samples\UV042821HA52\Point\_measurement\_Fragment\_111322\_24.apit  
 Acquired Datetime : 2022/11/13 11:58:41

### ● Search Parameters

Library list :  
 IRs Polymer2  
 ATR-Polymer2  
 T-Polymer2  
 Maximum hits: 200  
 Minimum quality : 0  
 Algorithm : DiffDeriv

| Score | Library    | Name | Comment                                       |
|-------|------------|------|-----------------------------------------------|
| 589   | T-Polymer2 | PC   | Polycarbonate(PC)<br>Transmission(Microscope) |

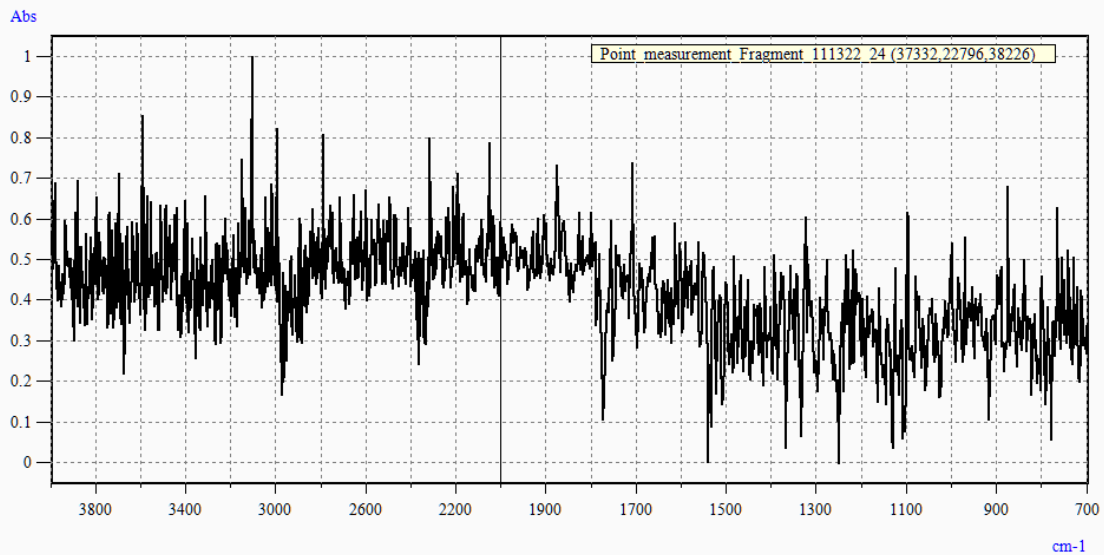

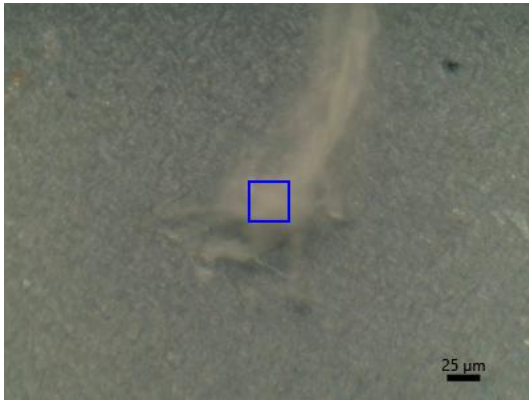

## Search Result Report

Filename : C:\Users\User\Desktop\UTSA  
samples\UV042821HA52\Point\_measurement\_Fragment\_111322\_25.apit

Acquired Datetime : 2022/11/13 12:01:44

### ● Search Parameters

Library list :

IRs

Polymer2

ATR-Polymer2

T-Polymer2

Maximum hits:

200

Minimum quality :

0

Algorithm : DiffDeriv

| Score | Library    | Name  | Comment                                       |
|-------|------------|-------|-----------------------------------------------|
| 594   | T-Polymer2 | T_PC2 | Polycarbonate(PC)<br>Transmission(Microscope) |

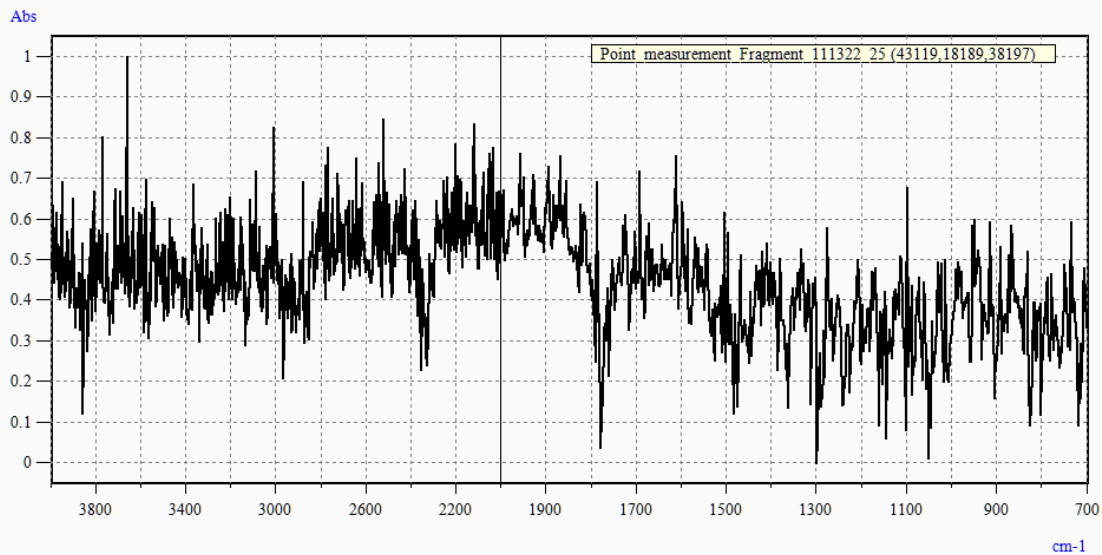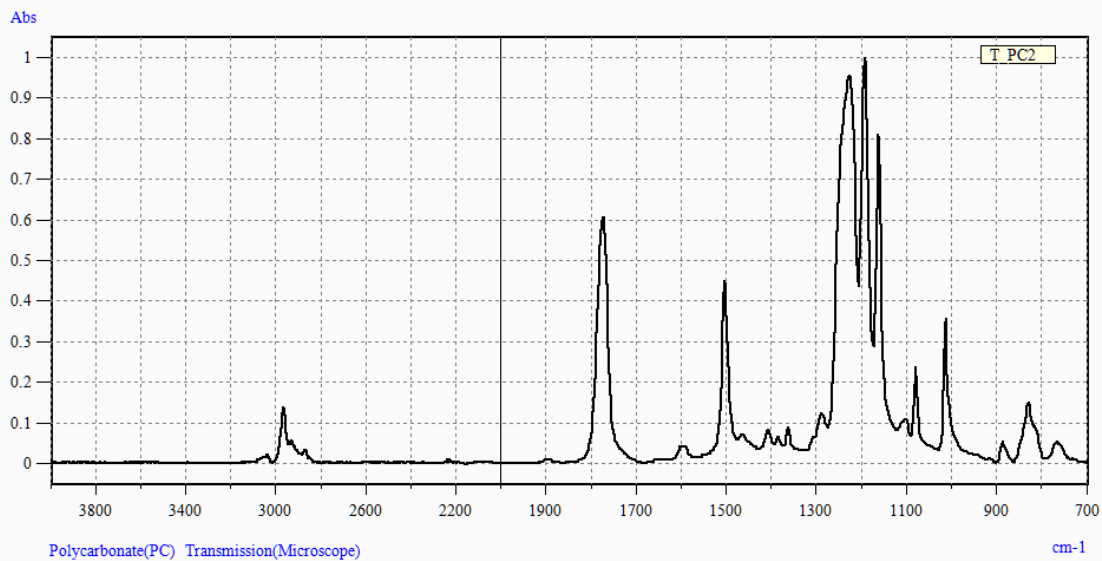

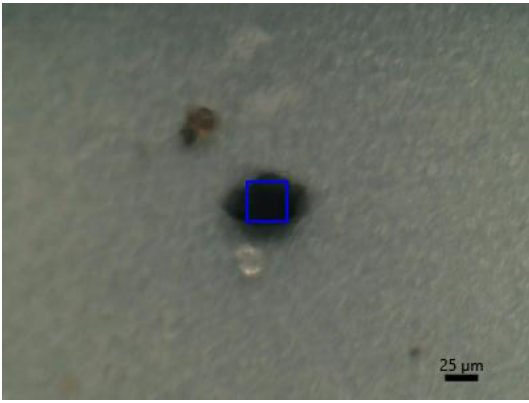

## Search Result Report

Filename : C:\Users\User\Desktop\UTSA  
 samples\UV042821HA52\Point\_measurement\_Fragment\_111322\_26.apit  
 Acquired Datetime : 2022/11/13 12:02:51

### ● Search Parameters

Library list :  
 IRs Polymer2  
 ATR-Polymer2  
 T-Polymer2  
 Maximum hits: 200  
 Minimum quality : 0  
 Algorithm : DiffDeriv

| Score | Library      | Name | Comment                                |
|-------|--------------|------|----------------------------------------|
| 589   | IRs Polymer2 | PS   | PolystyreneATR/diamond<br>ATRcorrected |

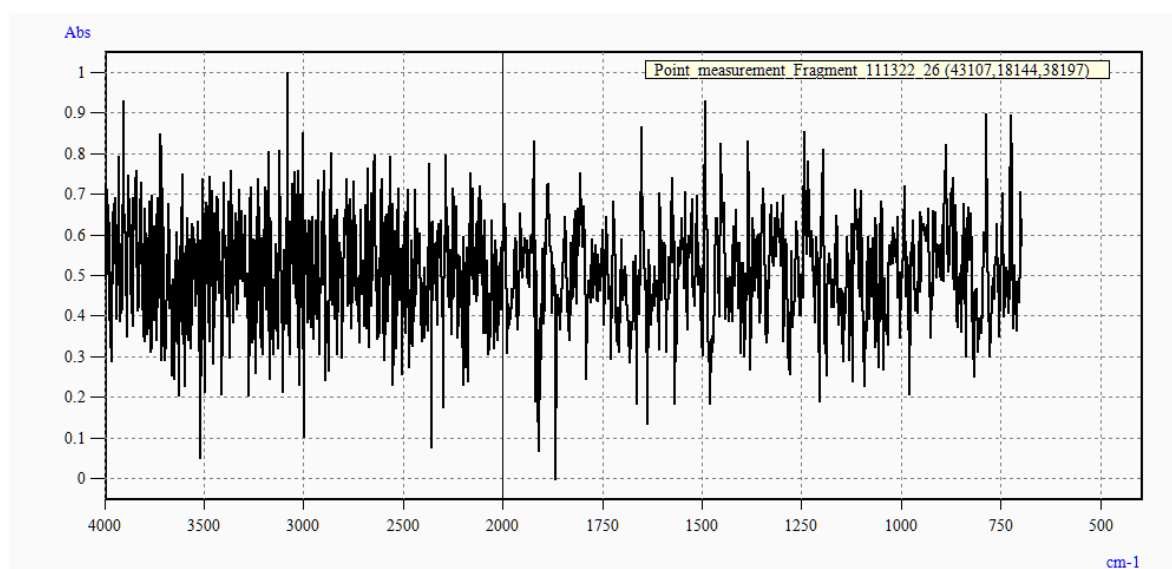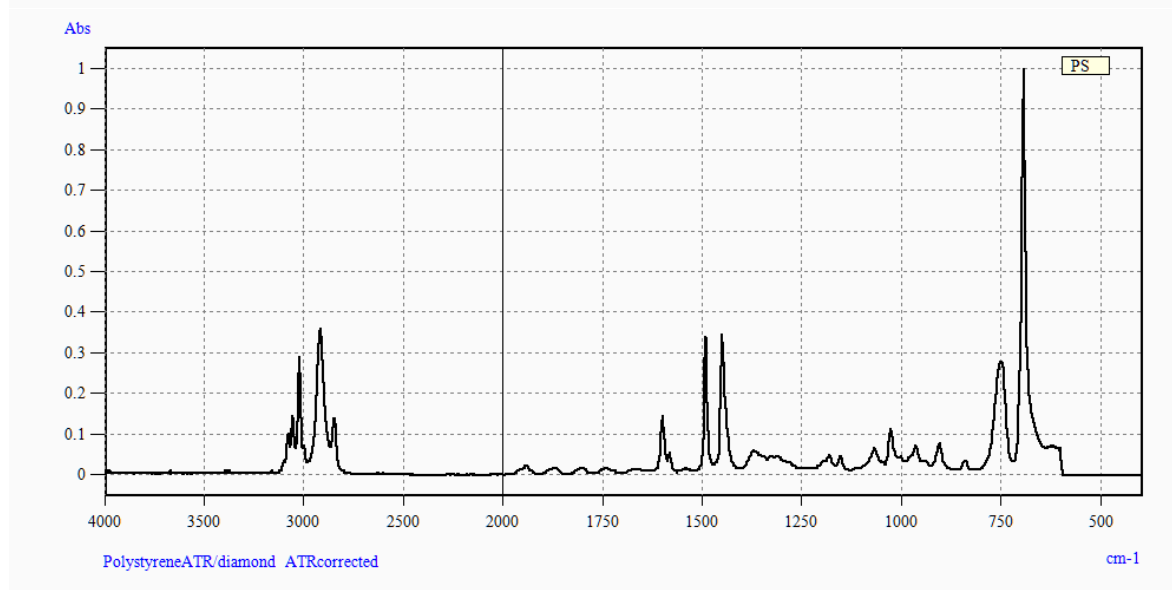

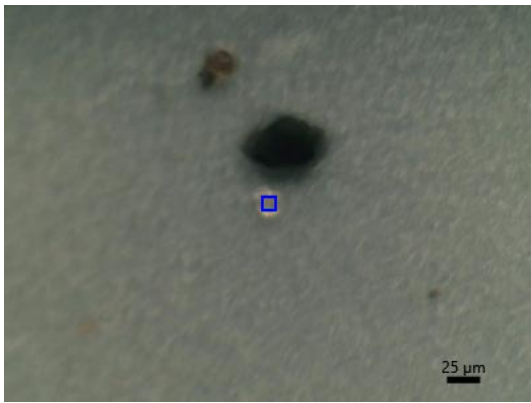

## Search Result Report

Filename : C:\Users\User\Desktop\UTSA  
samples\UV042821HA52\Point\_measurement\_Fragment\_111322\_27.apit

Acquired Datetime : 2022/11/13 12:07:33

### ● Search Parameters

Library list :

IRs

Polymer2

ATR-Polymer2

T-Polymer2

Maximum hits:

200

Minimum quality :

0

Algorithm : DiffDeriv

| Score | Library    | Name | Comment                                       |
|-------|------------|------|-----------------------------------------------|
| 622   | T-Polymer2 | PC   | Polycarbonate(PC)<br>Transmission(Microscope) |

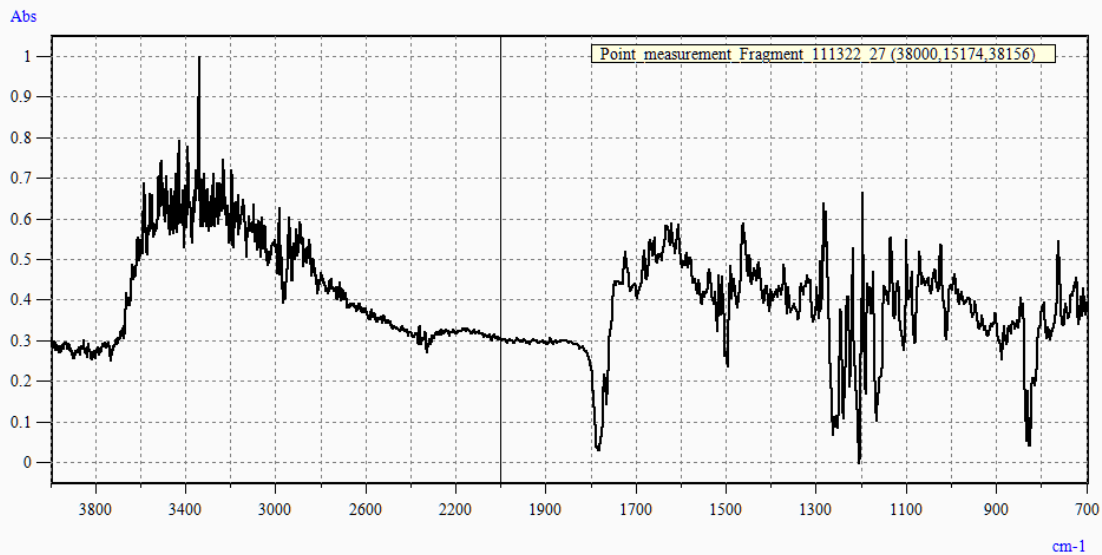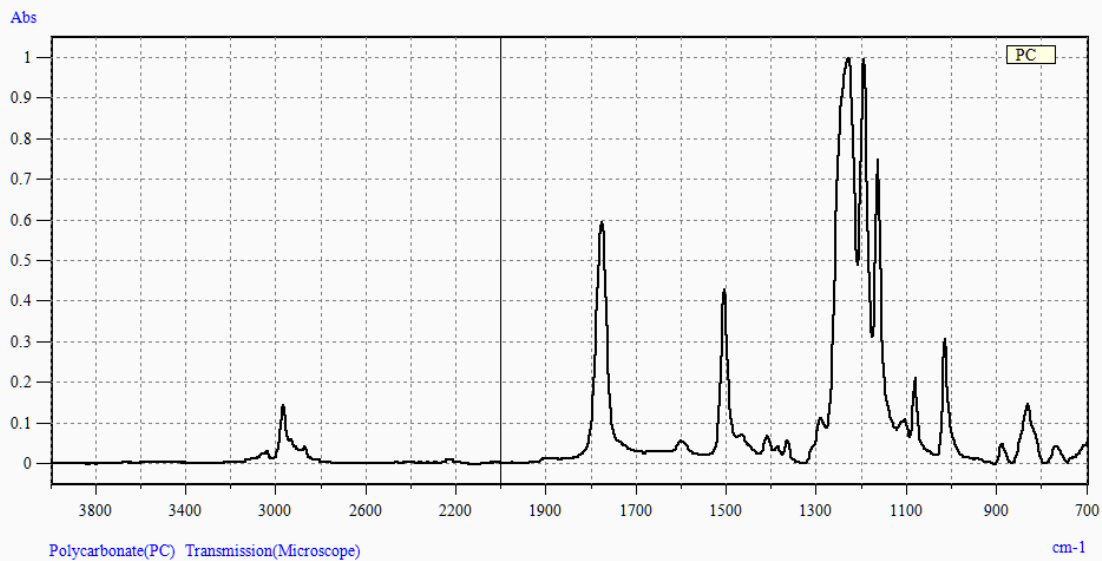

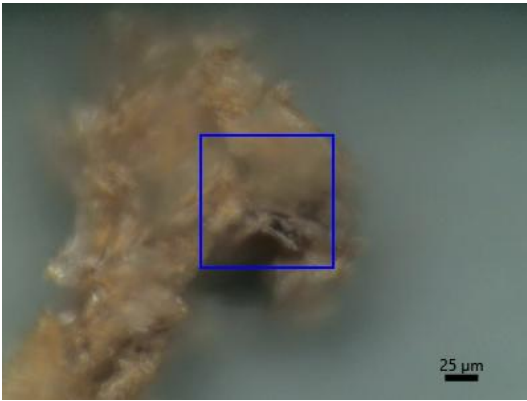

## Search Result Report

Filename : C:\Users\User\Desktop\UTSA  
 samples\UV042821HA52\Point\_measurement\_Fragment\_111322\_28.apit  
 Acquired Datetime : 2022/11/13 12:13:17

### ● Search Parameters

Library list :  
 IRs Polymer2  
 ATR-Polymer2  
 T-Polymer2  
 Maximum hits: 200  
 Minimum quality : 0  
 Algorithm : DiffDeriv

| Score | Library    | Name                        | Comment                                                                              |
|-------|------------|-----------------------------|--------------------------------------------------------------------------------------|
| 590   | T-Polymer2 | High-trans<br>Polybutadiene | High-trans Butadiene<br>Rubber(High-trans Polybutadiene)<br>Transmission(Microscope) |

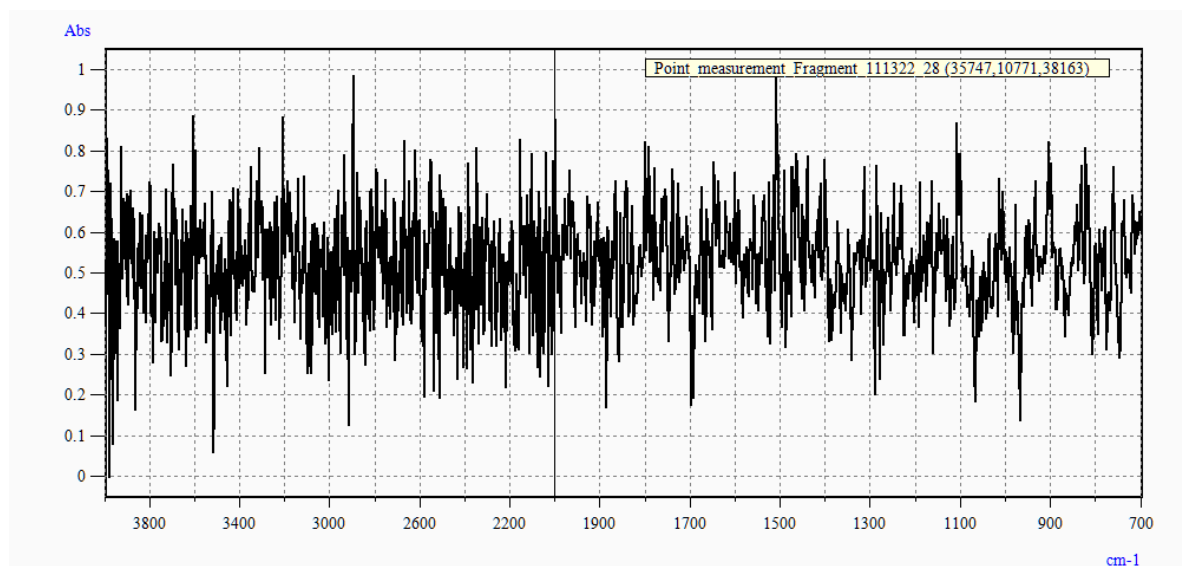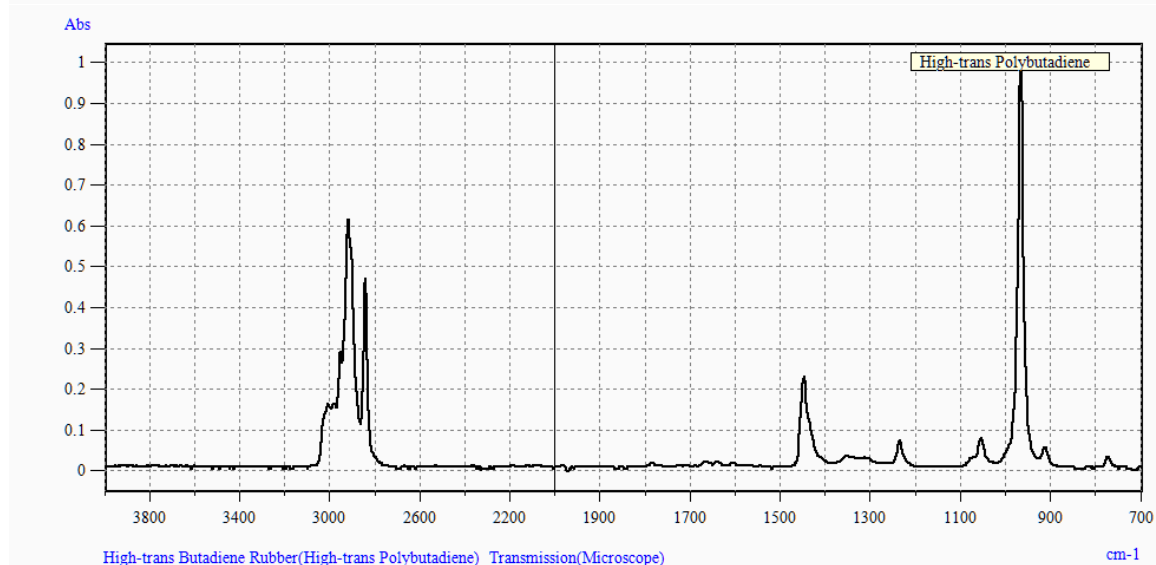

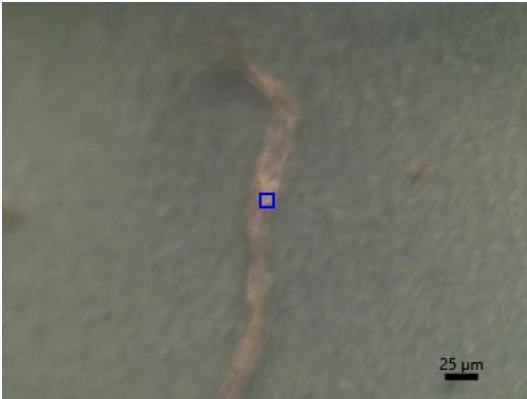

## Search Result Report

Filename : C:\Users\User\Desktop\UTSA  
 samples\UV042821HA52\Point\_measurement\_Fragment\_111322\_29.apit  
 Acquired Datetime : 2022/11/13 12:24:17

### ● Search Parameters

Library list :  
 IRs Polymer2  
 ATR-Polymer2  
 T-Polymer2  
 Maximum hits: 200  
 Minimum quality : 0  
 Algorithm : DiffDeriv

| Score | Library    | Name                | Comment                                       |
|-------|------------|---------------------|-----------------------------------------------|
| 596   | T-Polymer2 | T_1_2_Polybutadiene | 1,2-Polybutadiene<br>Transmission(Microscope) |

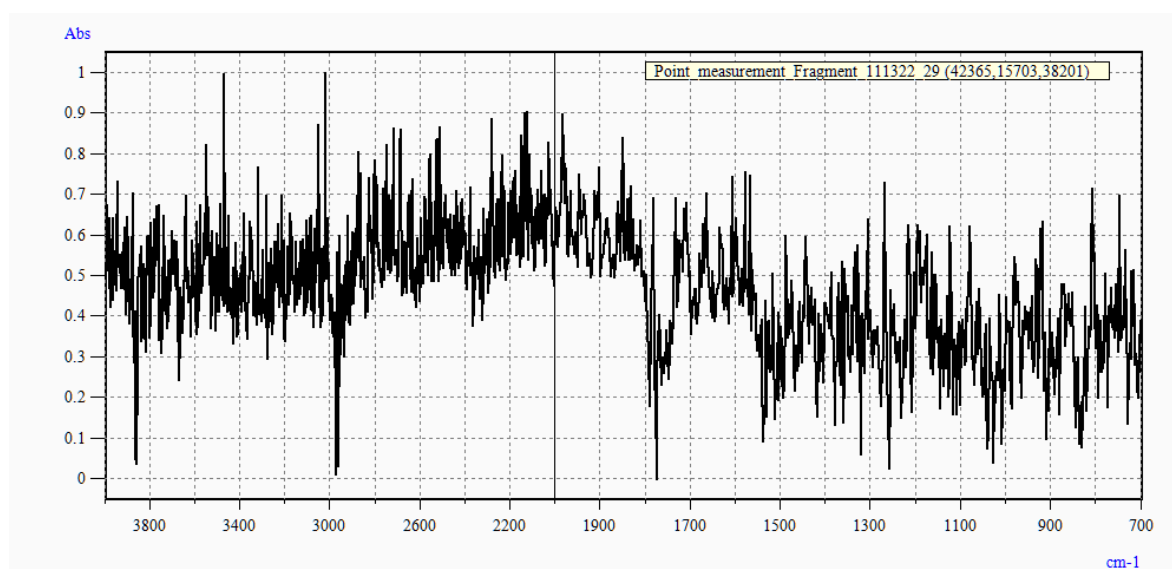

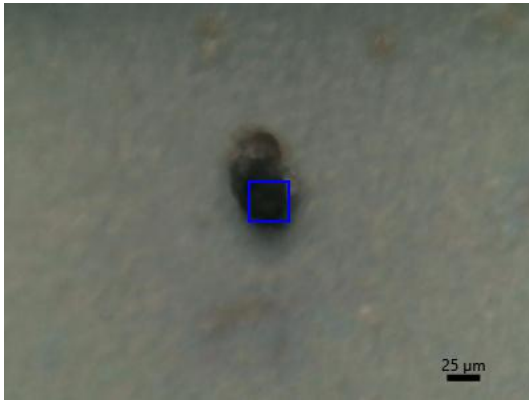

## Search Result Report

Filename : C:\Users\User\Desktop\UTSA  
samples\UV042821HA52\Point\_measurement\_Fragment\_111322\_30.apit

Acquired Datetime : 2022/11/13 12:26:34

● **Search Parameters**

Library list :

IRs Polymer2

ATR-Polymer2

T-Polymer2

Maximum hits: 200

Minimum quality : 0

Algorithm : DiffDeriv

| Score | Library      | Name  | Comment                                                                                                                    |
|-------|--------------|-------|----------------------------------------------------------------------------------------------------------------------------|
| 593   | IRs Polymer2 | DLTDP | DLTDPANTIOXIDANT (CONTAINING<br>SULFUR)DILAURYL<br>THIODIPROPIONATEC30H58O4SCAS<br>NO. 123-28-4ATR/diamond<br>ATRcorrected |

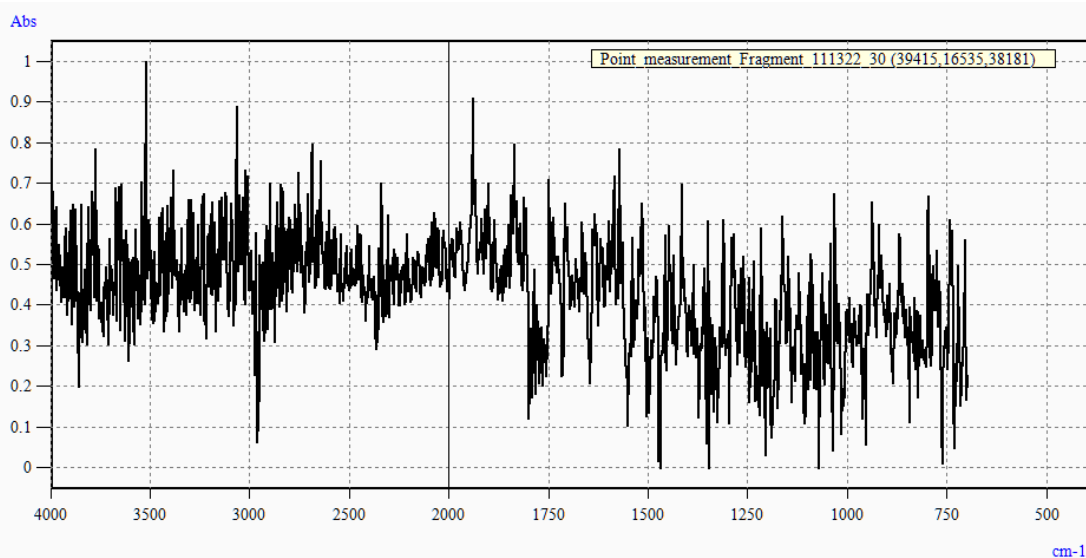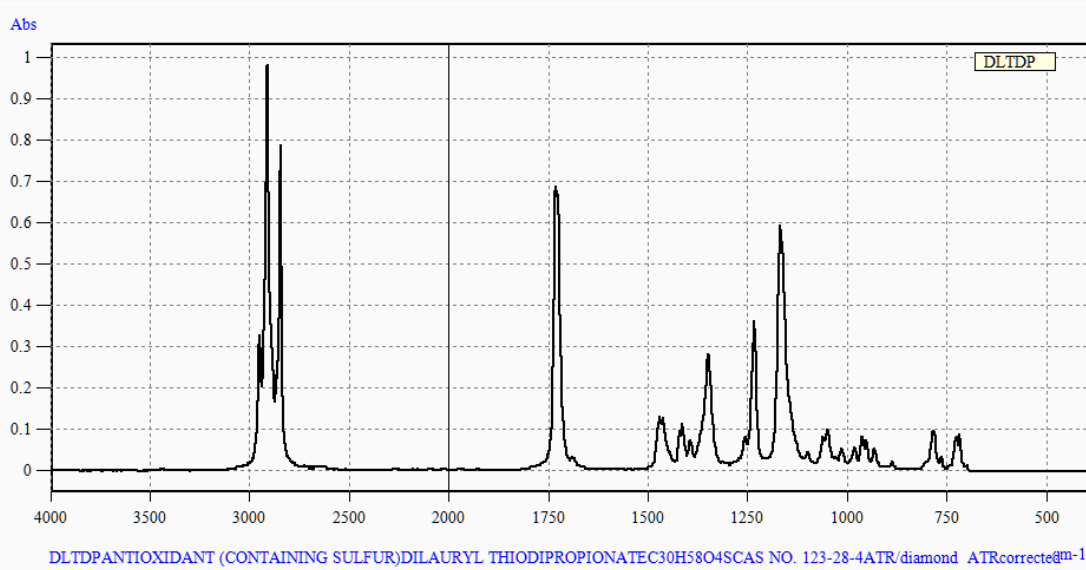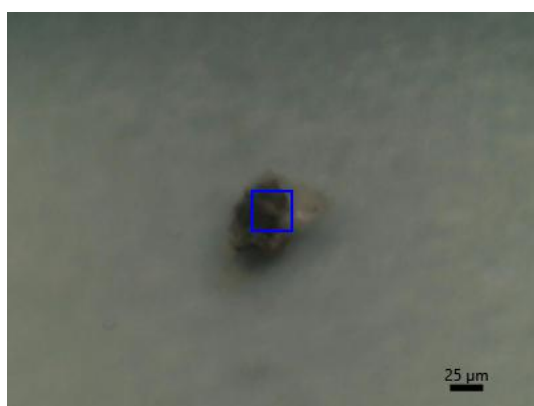

## Search Result Report

Filename : C:\Users\User\Desktop\UTSA  
 samples\UV042821HA52\Point\_measurement\_Fragment\_111322\_31.apit  
 Acquired Datetime : 2022/11/13 12:29:50

### ● Search Parameters

Library list :  
 IRs Polymer2  
 ATR-Polymer2  
 T-Polymer2  
 Maximum hits: 200  
 Minimum quality : 0  
 Algorithm : DiffDeriv

| Score | Library      | Name | Comment                          |
|-------|--------------|------|----------------------------------|
| 619   | ATR-Polymer2 | D_PC | Polycarbonate(PC) DuraSamplIR-II |

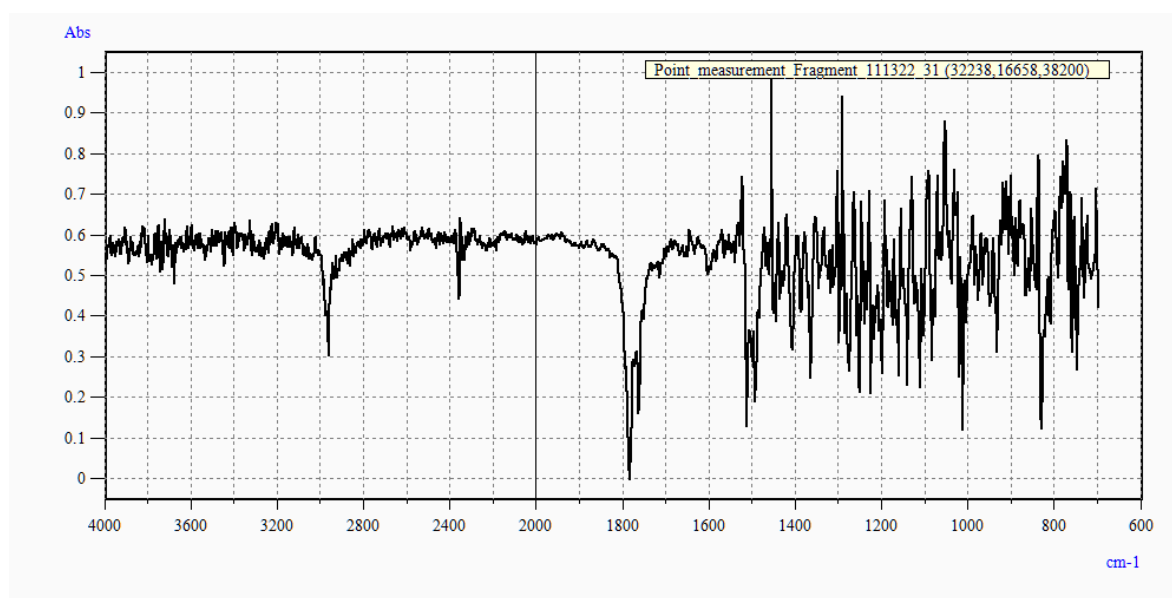

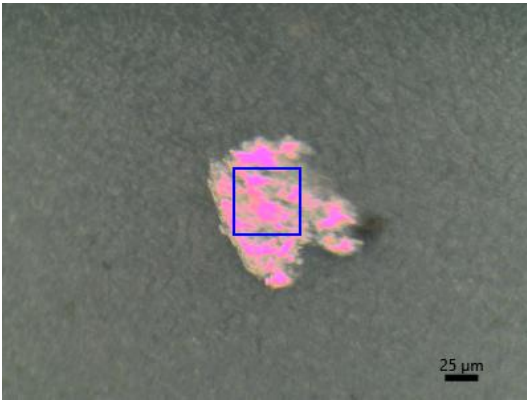

## Search Result Report

Filename : C:\Users\User\Desktop\UTSA  
 samples\UV042821HA52\Point\_measurement\_Fragment\_111322\_32.apit  
 Acquired Datetime : 2022/11/13 12:35:48

### ● Search Parameters

Library list :  
 IRs Polymer2  
 ATR-Polymer2  
 T-Polymer2  
 Maximum hits: 200  
 Minimum quality : 0  
 Algorithm : DiffDeriv

| Score | Library      | Name        | Comment                                                      |
|-------|--------------|-------------|--------------------------------------------------------------|
| 581   | ATR-Polymer2 | D_Nylon6_12 | Nylon 6/12(Polyhexamethylene dodecanediamide) DuraSamplIR-II |

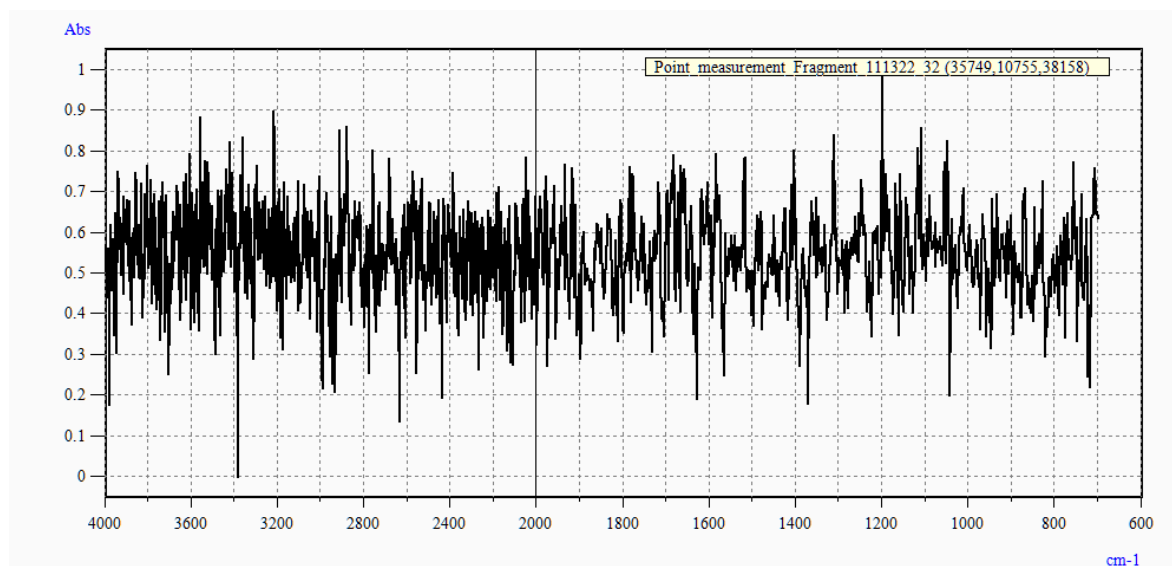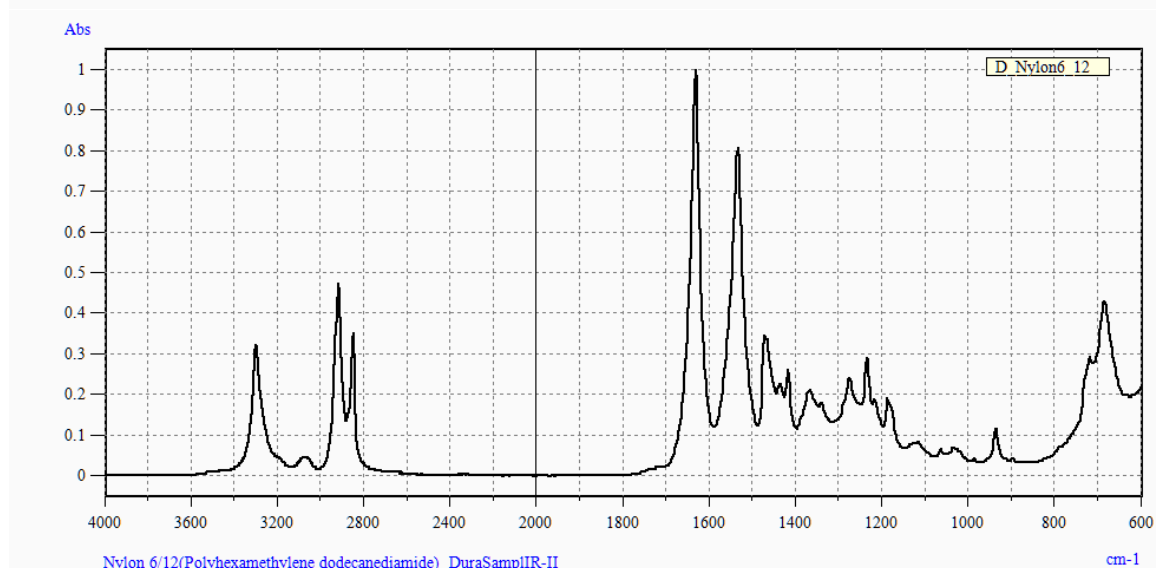

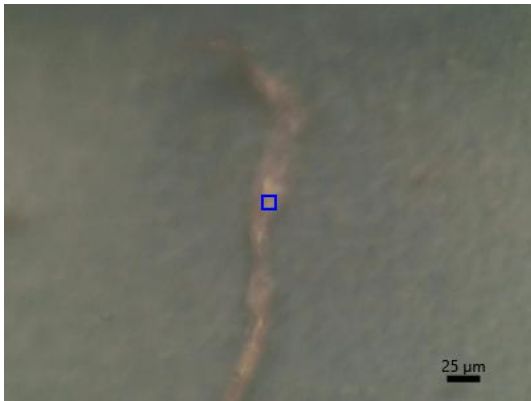

## Search Result Report

Filename : C:\Users\User\Desktop\UTSA  
 samples\UV042821HA52\Point\_measurement\_Fragment\_111322\_33.apit  
 Acquired Datetime : 2022/11/13 12:40:46

### ● Search Parameters

Library list :  
 IRs Polymer2  
 ATR-Polymer2  
 T-Polymer2  
 Maximum hits: 200  
 Minimum quality : 0  
 Algorithm : DiffDeriv

| Score | Library      | Name | Comment |
|-------|--------------|------|---------|
| 574   | IRs Polymer2 | PES  | PESFilm |

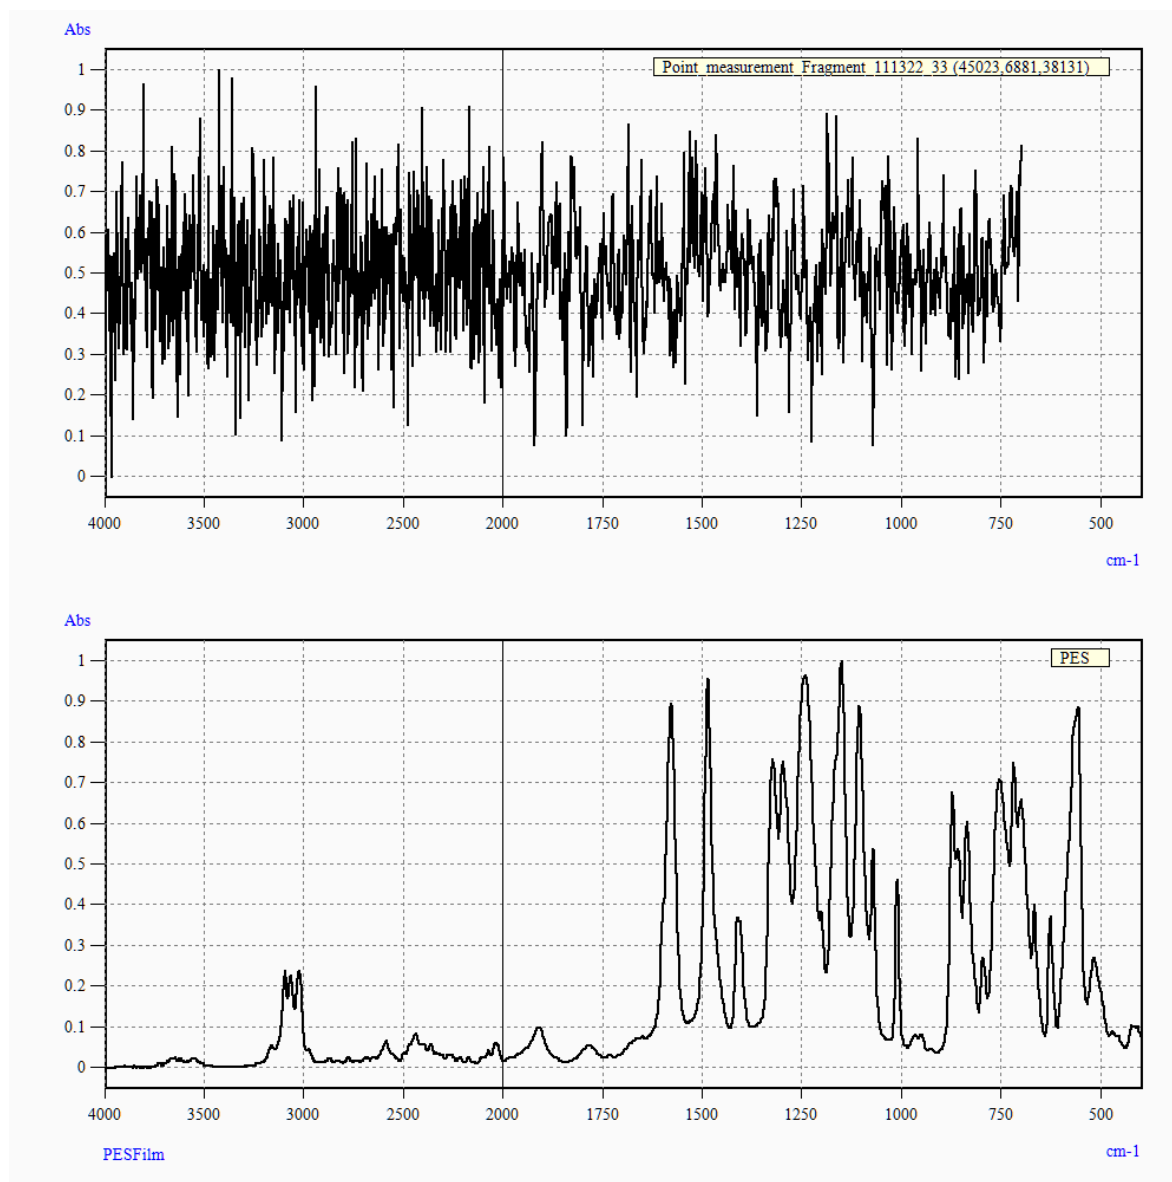

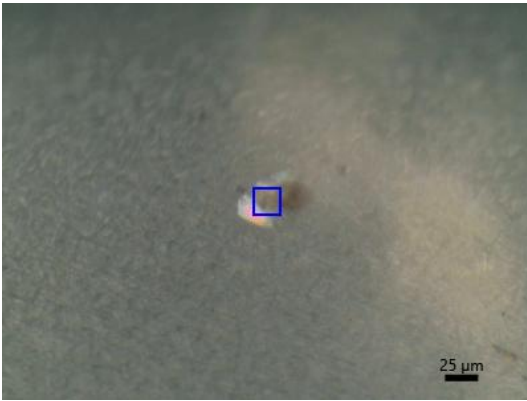

## Search Result Report

Filename : C:\Users\User\Desktop\UTSA  
 samples\UV042821HA52\Point\_measurement\_Fragment\_111322\_34.apit  
 Acquired Datetime : 2022/11/13 12:44:47

### ● Search Parameters

Library list :  
 IRs Polymer2  
 ATR-Polymer2  
 T-Polymer2  
 Maximum hits: 200  
 Minimum quality : 0  
 Algorithm : DiffDeriv

| Score | Library    | Name  | Comment                                       |
|-------|------------|-------|-----------------------------------------------|
| 720   | T-Polymer2 | T_PC2 | Polycarbonate(PC)<br>Transmission(Microscope) |

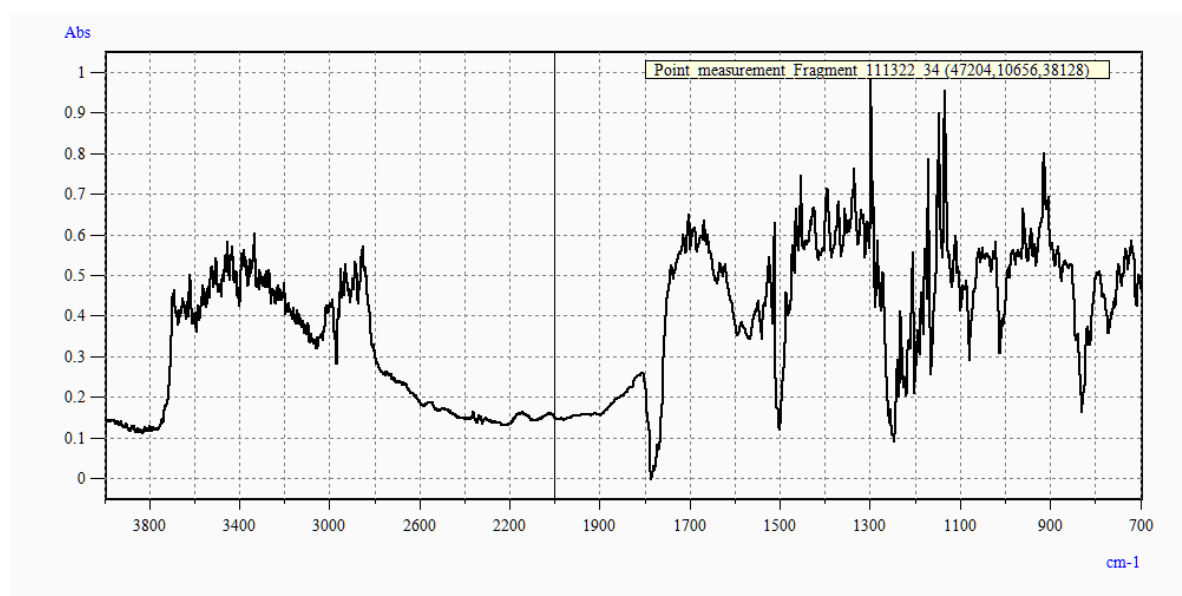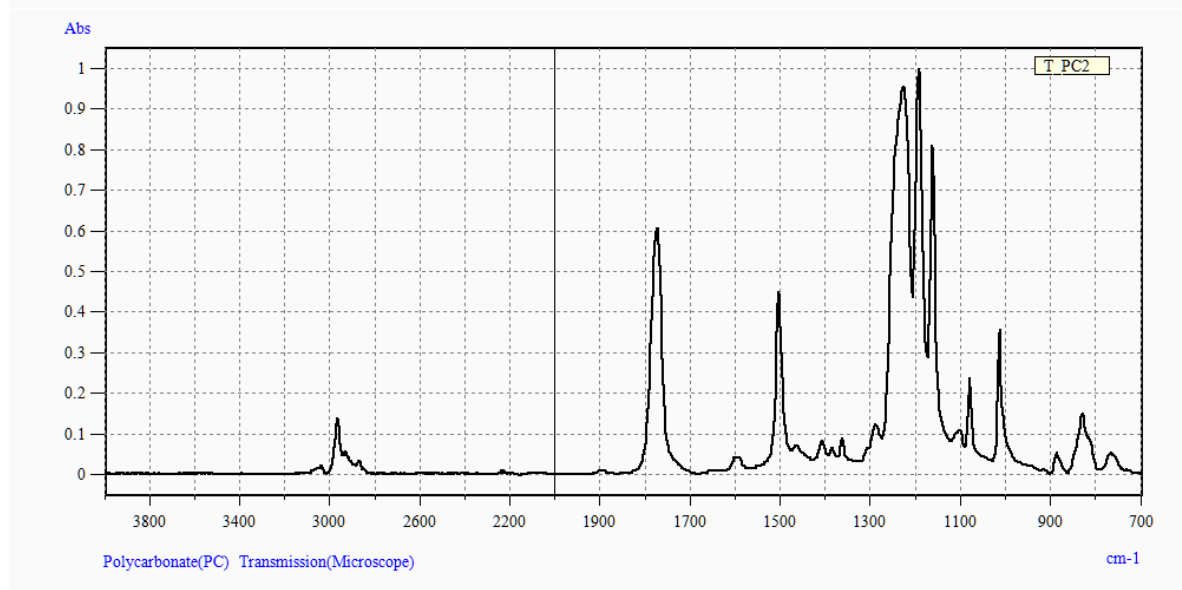

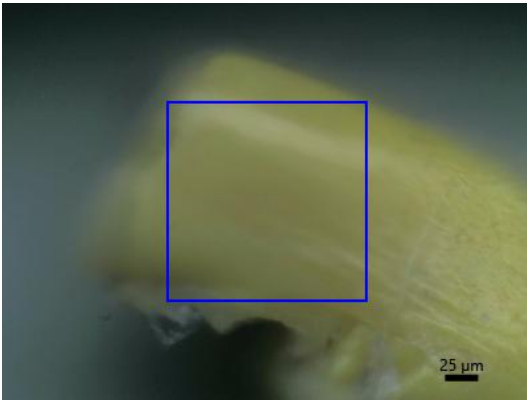

# Search Result Report

Filename : C:\Users\User\Desktop\UTSA  
 samples\UV042821HA52\Point\_measurement\_Fragment\_111322\_35.apit  
 Acquired Datetime : 2022/11/13 12:47:04

● **Search Parameters**

Library list :  
 IRs Polymer2  
 ATR-Polymer2  
 T-Polymer2  
 Maximum hits: 200  
 Minimum quality : 0  
 Algorithm : DiffDeriv

| Score | Library    | Name  | Comment                                     |
|-------|------------|-------|---------------------------------------------|
| 594   | T-Polymer2 | Epoxy | Epoxy Adhesives<br>Transmission(Microscope) |

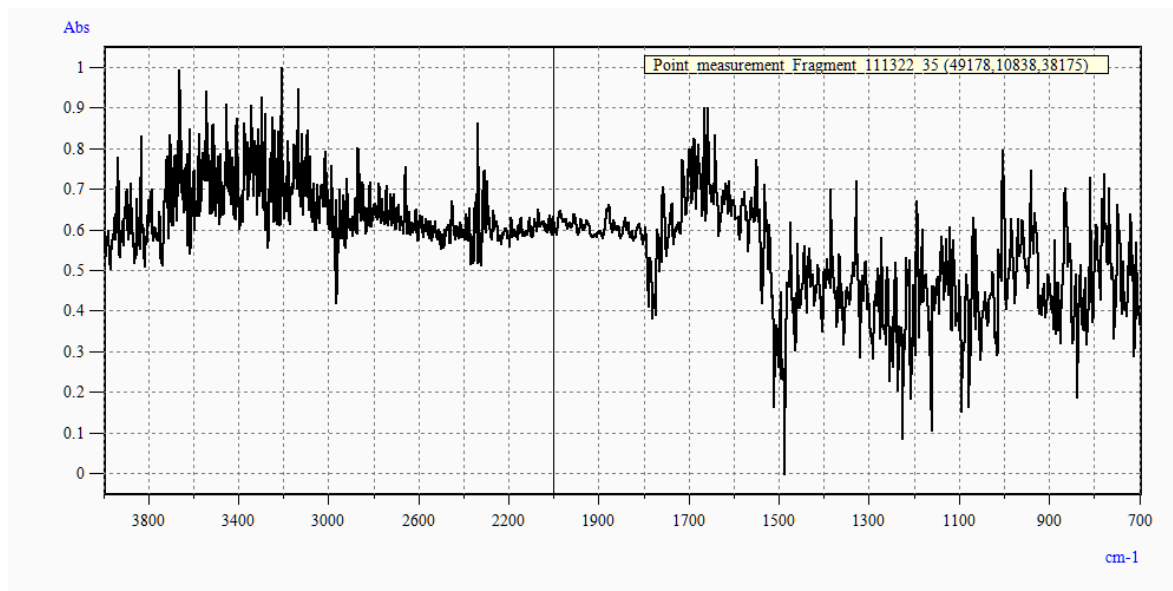

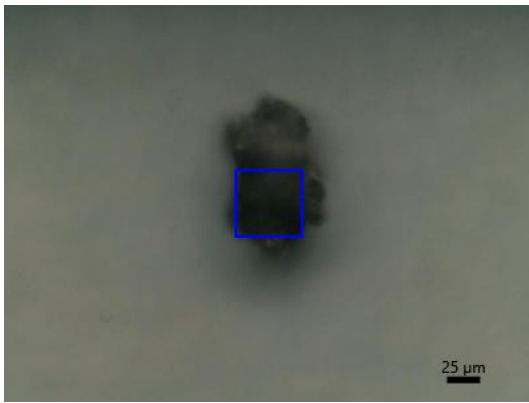

Supplement: Supplementary file 1 [file 7f5d0d08f70a1200847429c3.pdf]
