# Supplementary material
Source: Research Square preprint supplement (doi:10.21203/rs.3.rs-9512208/v1)

## Search Result Report

---

Filename : C:\Users\User\Desktop\UTSA samples\DR042821HA32\Point  
 Measurement\_Fragment\_111222\_48.apit

Acquired Datetime : 2022/11/12 16:01:03

● **Search Parameters**

Library list :

IRs Polymer2

ATR-Polymer2

T-Polymer2

Maximum hits: 200

Minimum quality : 0

Algorithm : DiffDeriv

| Score | Library      | Name | Comment                                |
|-------|--------------|------|----------------------------------------|
| 575   | IRs Polymer2 | PS   | PolystyreneATR/diamond<br>ATRcorrected |

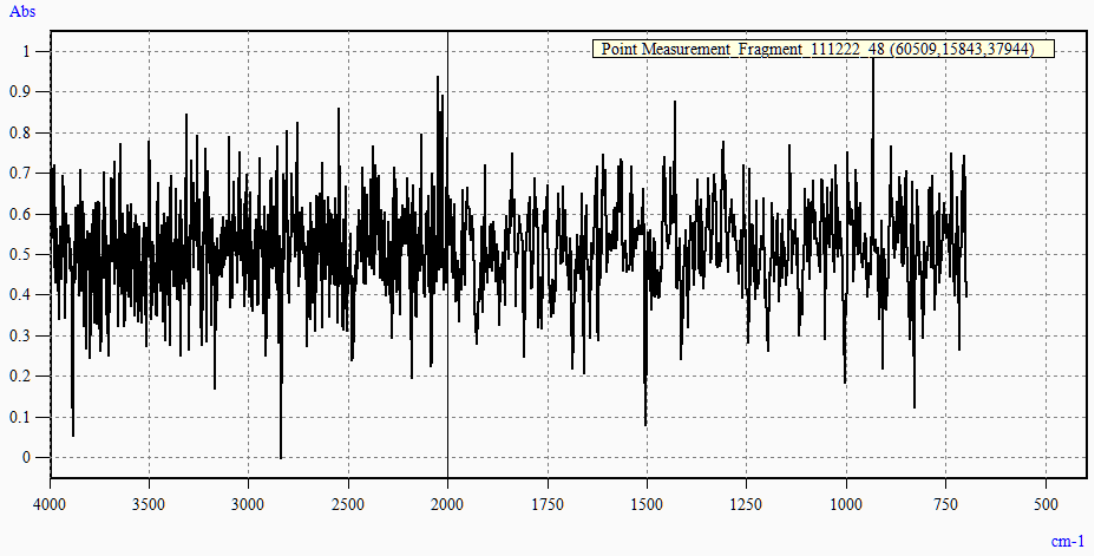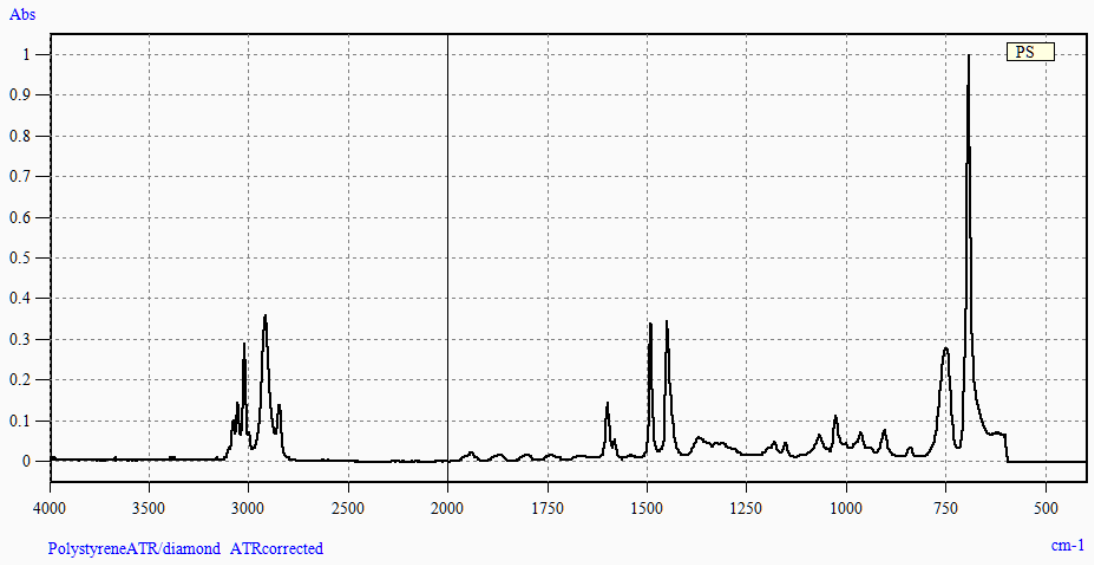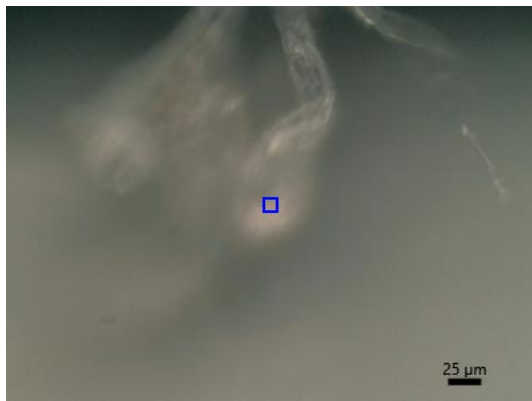

## Search Result Report

---

Filename : C:\Users\User\Desktop\UTSA samples\DR042821HA32\Point  
 Measurement\_Fragment\_111222\_49.apit  
 Acquired Datetime : 2022/11/12 16:05:18

● **Search Parameters**

Library list :  
 IRs : Polymer2  
 ATR-Polymer2  
 T-Polymer2  
 Maximum hits: 200  
 Minimum quality : 0  
 Algorithm : DiffDeriv

| Score | Library      | Name                       | Comment                                     |
|-------|--------------|----------------------------|---------------------------------------------|
| 581   | ATR-Polymer2 | D_Poly_alpha_Methylstyrene | Poly(alpha-Methylstyrene)<br>DuraSamplIR-II |

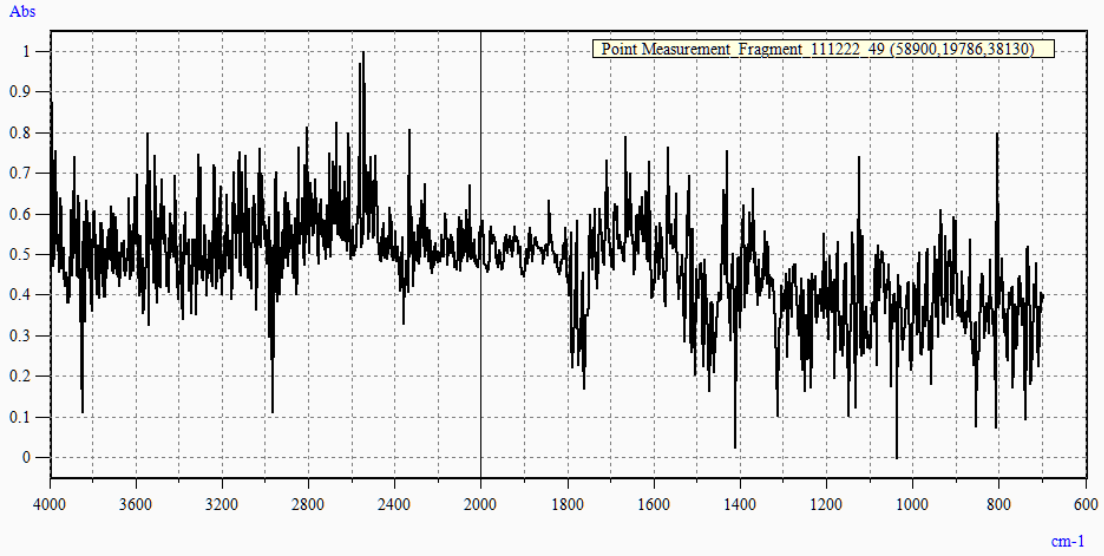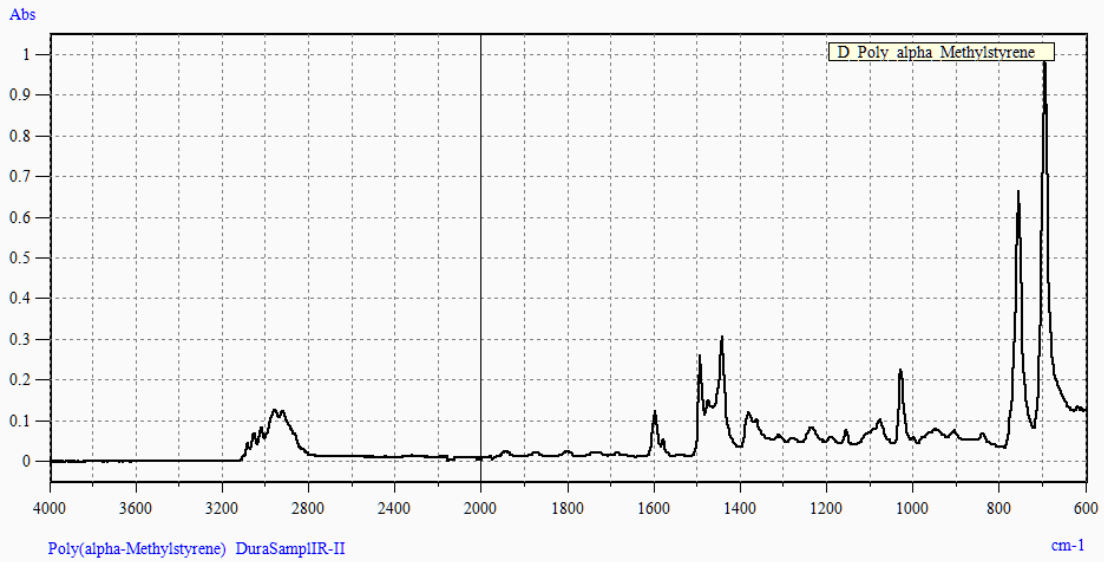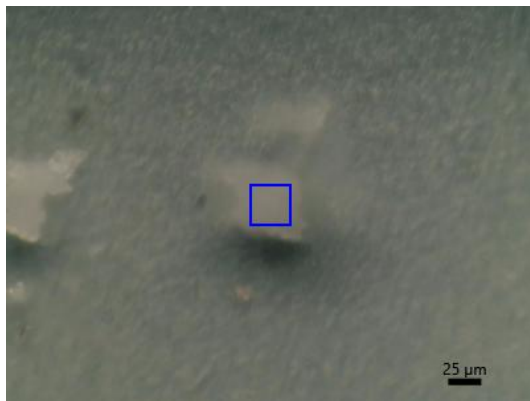

## Search Result Report

---

Filename : C:\Users\User\Desktop\UTSA samples\DR042821HA32\Point  
 Measurement\_Fragment\_111222\_50.apit  
 Acquired Datetime : 2022/11/12 16:10:11

● **Search Parameters**

Library list :  
 IRs Polymer2  
 ATR-Polymer2  
 T-Polymer2  
 Maximum hits: 200  
 Minimum quality : 0  
 Algorithm : DiffDeriv

| Score | Library      | Name | Comment       |
|-------|--------------|------|---------------|
| 569   | IRs Polymer2 | PI2  | PolyimideFilm |

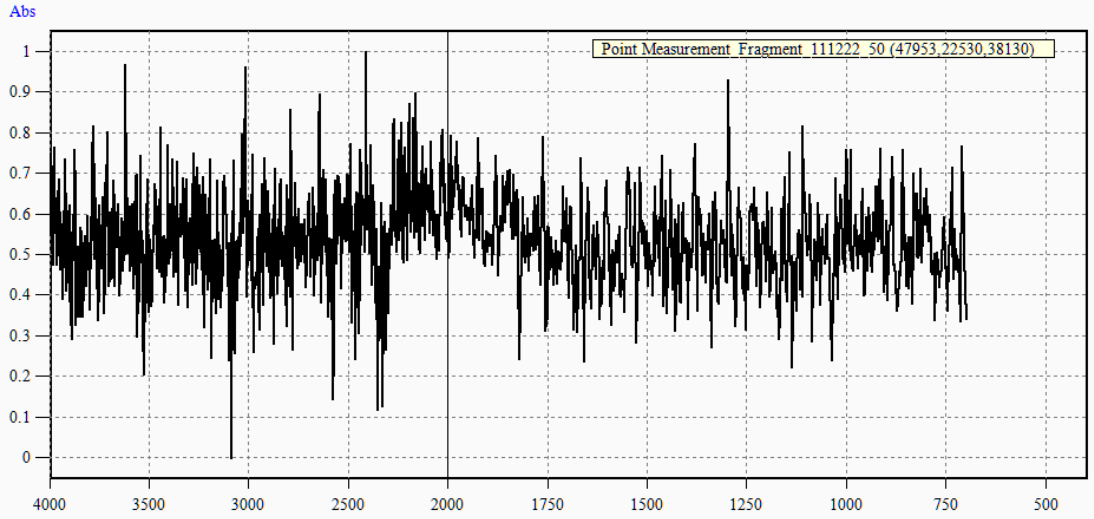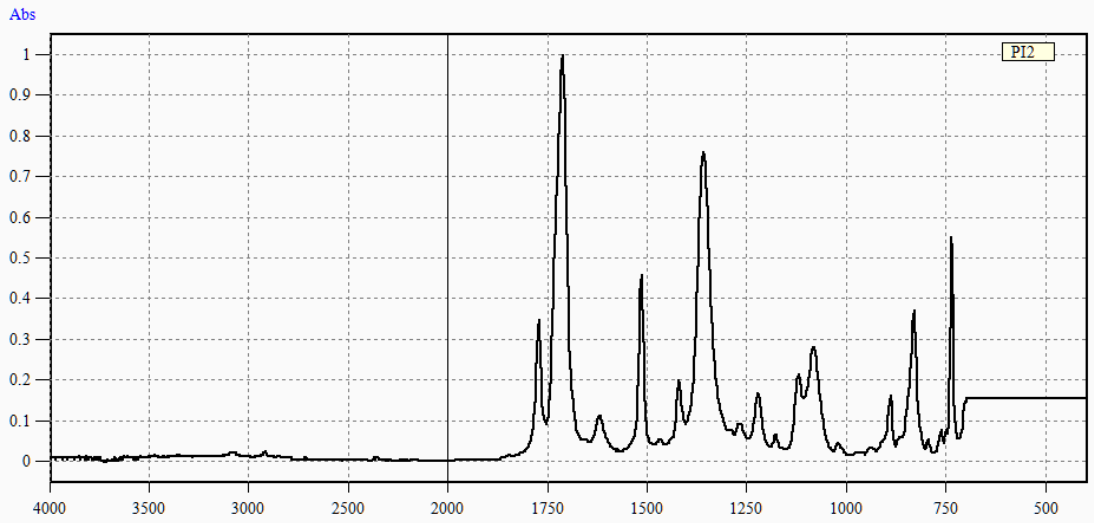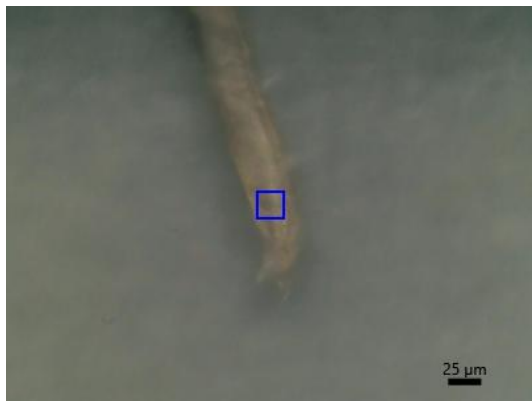

## Search Result Report

---

Filename : C:\Users\User\Desktop\UTSA samples\DR042821HA32\Point  
 Measurement\_Fragment\_111222\_51.apit  
 Acquired Datetime : 2022/11/12 16:15:08

● **Search Parameters**

Library list :  
 IRs : Polymer2  
 ATR-Polymer2  
 T-Polymer2  
 Maximum hits: 200  
 Minimum quality : 0  
 Algorithm : DiffDeriv

| Score | Library    | Name  | Comment                                     |
|-------|------------|-------|---------------------------------------------|
| 585   | T-Polymer2 | Epoxy | Epoxy Adhesives<br>Transmission(Microscope) |

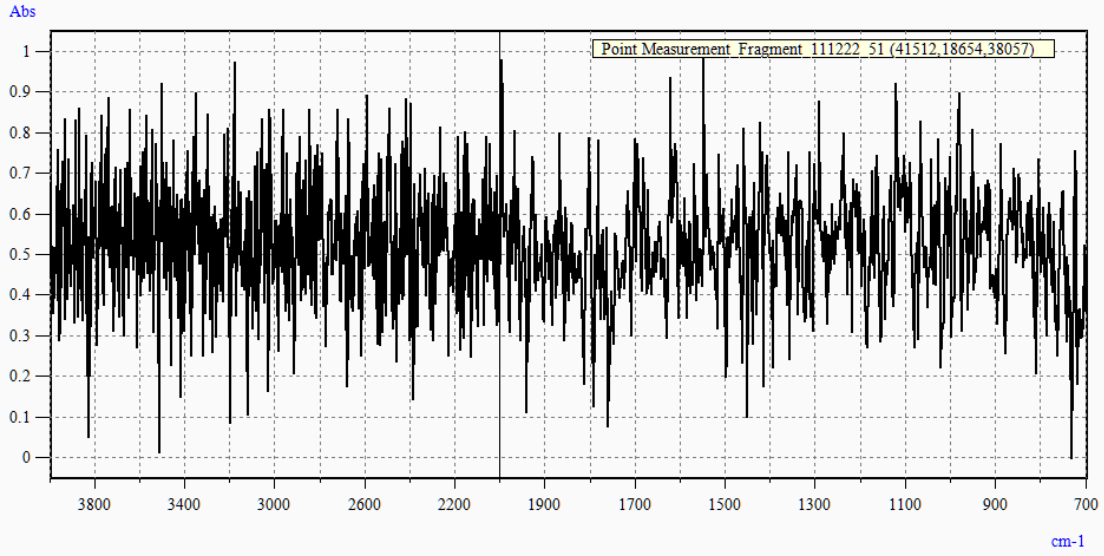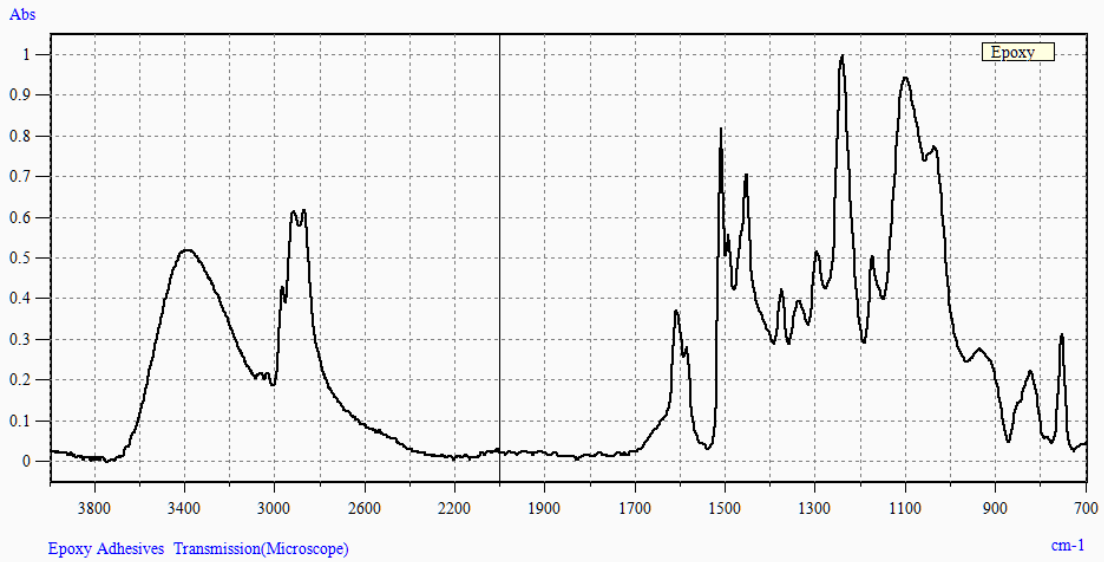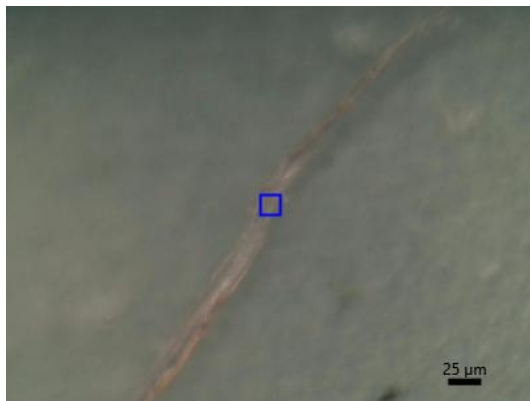

## Search Result Report

---

Filename : C:\Users\User\Desktop\UTSA samples\DR042821HA32\Point  
 Measurement\_Fragment\_111222\_52.apit  
 Acquired Datetime : 2022/11/12 16:19:26

● **Search Parameters**

Library list :  
 IRs Polymer2  
 ATR-Polymer2  
 T-Polymer2  
 Maximum hits: 200  
 Minimum quality : 0  
 Algorithm : DiffDeriv

| Score | Library    | Name           | Comment                                   |
|-------|------------|----------------|-------------------------------------------|
| 635   | T-Polymer2 | T_PhenoxyResin | Phenoxy Resin<br>Transmission(Microscope) |

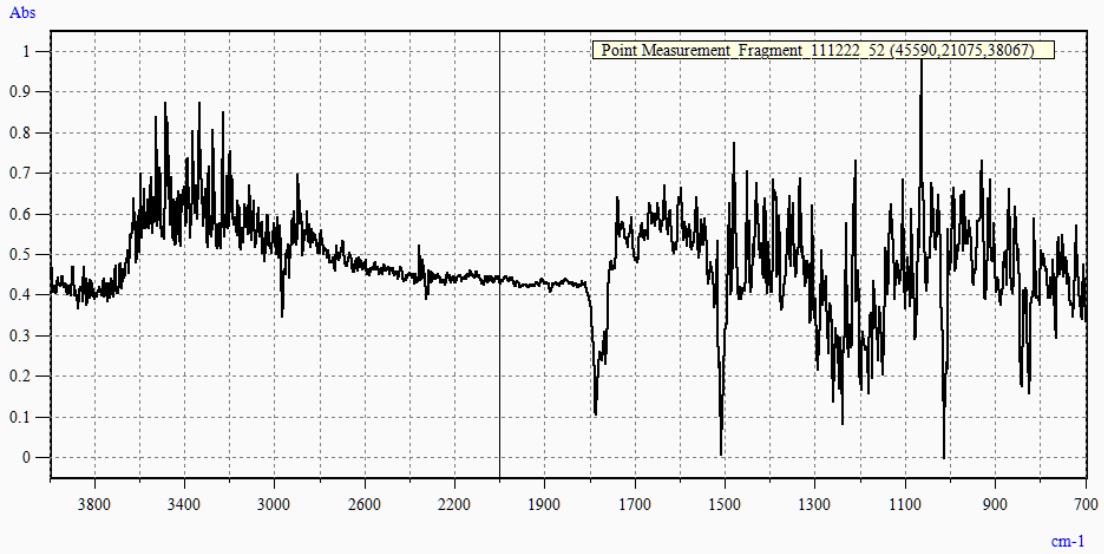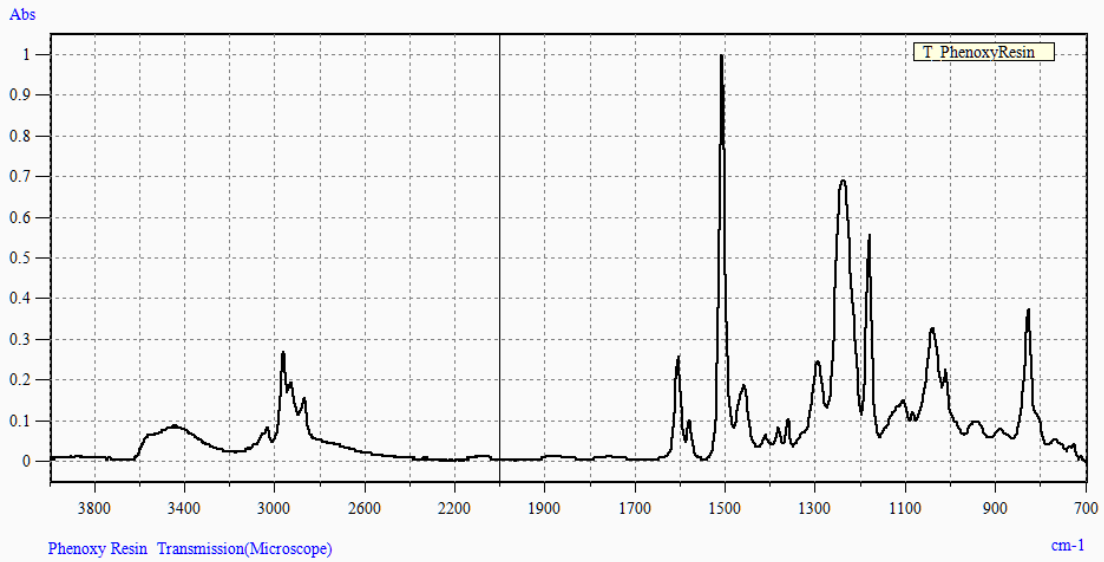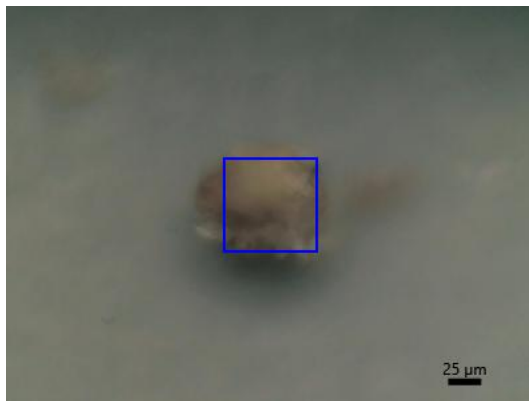

## Search Result Report

---

Filename : C:\Users\User\Desktop\UTSA samples\DR042821HA32\Point  
 Measurement\_Fragment\_111222\_53.apit  
 Acquired Datetime : 2022/11/12 16:21:19

● **Search Parameters**

Library list :  
 IRs Polymer2  
 ATR-Polymer2  
 T-Polymer2  
 Maximum hits: 200  
 Minimum quality : 0  
 Algorithm : DiffDeriv

| Score | Library      | Name | Comment                             |
|-------|--------------|------|-------------------------------------|
| 632   | ATR-Polymer2 | D_PC | Polycarbonate(PC)<br>DuraSamplIR-II |

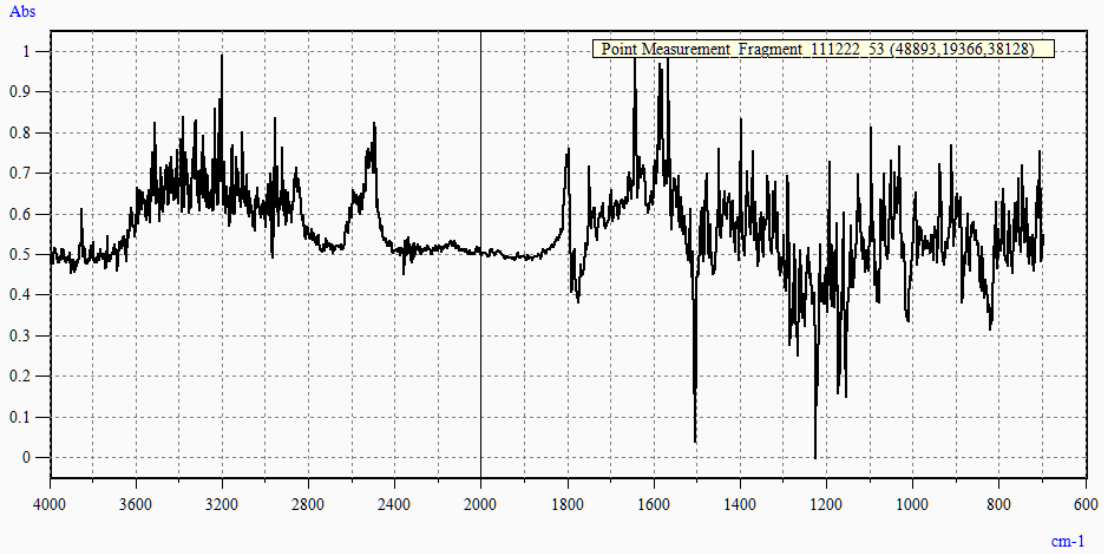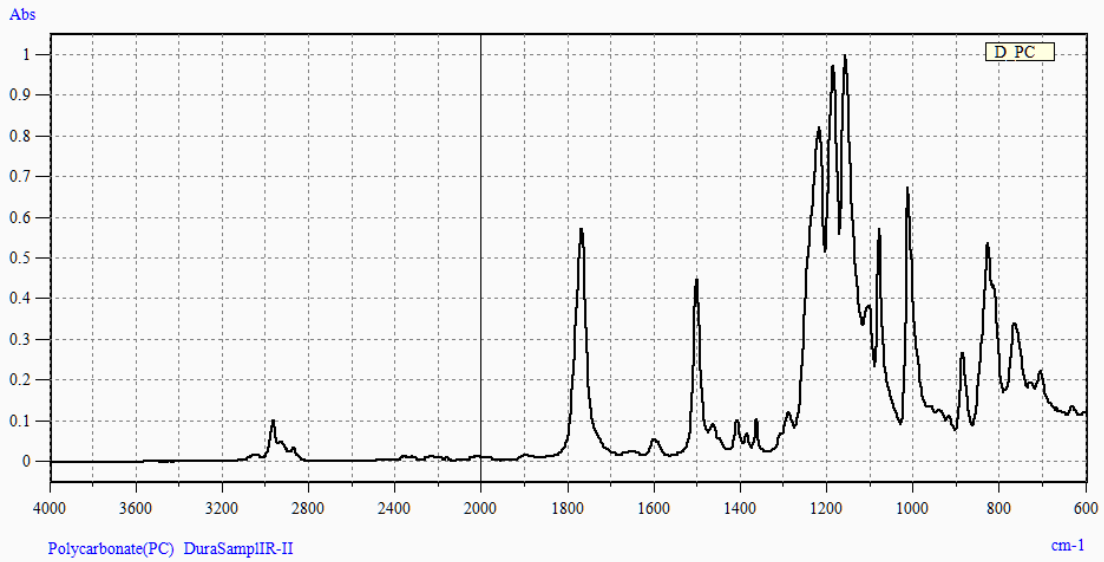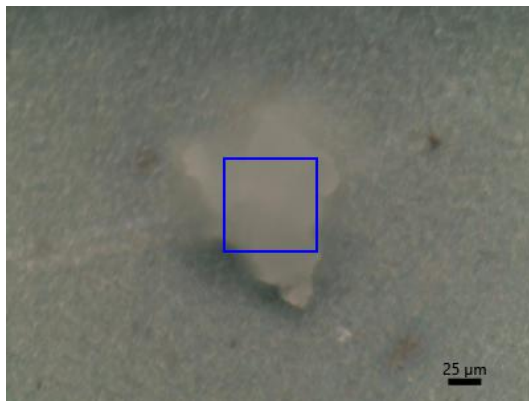

## Search Result Report

---

Filename : C:\Users\User\Desktop\UTSA samples\DR042821HA32\Point  
 Measurement\_Fragment\_111222\_54.apit  
 Acquired Datetime : 2022/11/12 16:23:51

● **Search Parameters**

Library list :  
 IRs Polymer2  
 ATR-Polymer2  
 T-Polymer2  
 Maximum hits: 200  
 Minimum quality : 0  
 Algorithm : DiffDeriv

| Score | Library    | Name | Comment                                       |
|-------|------------|------|-----------------------------------------------|
| 625   | T-Polymer2 | PC   | Polycarbonate(PC)<br>Transmission(Microscope) |

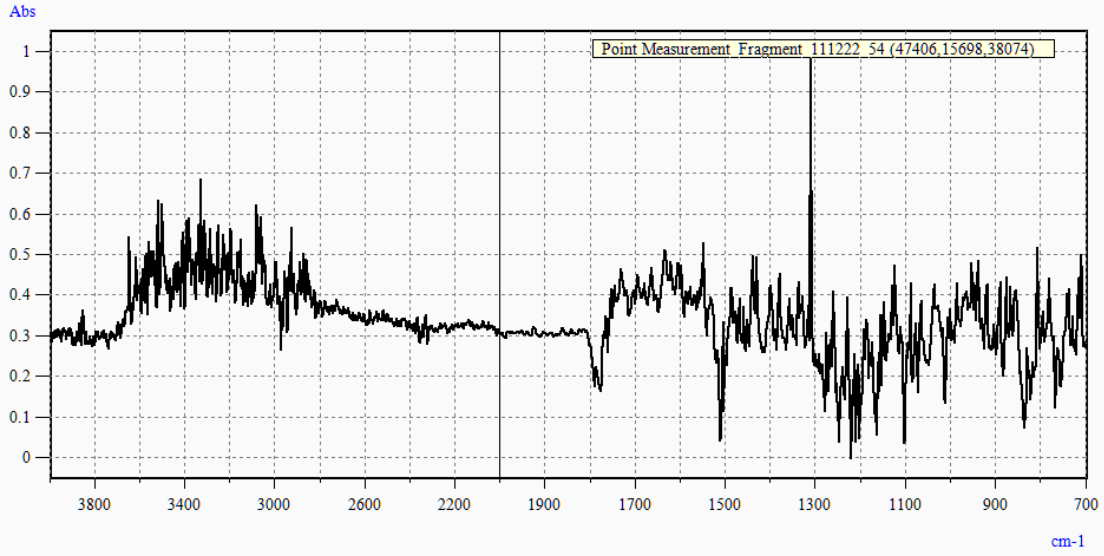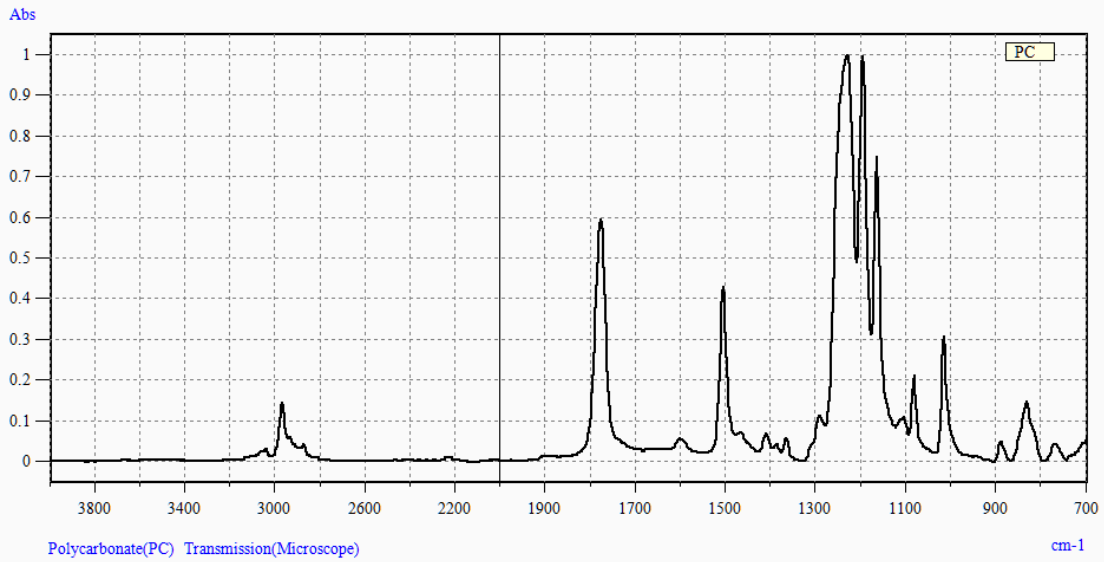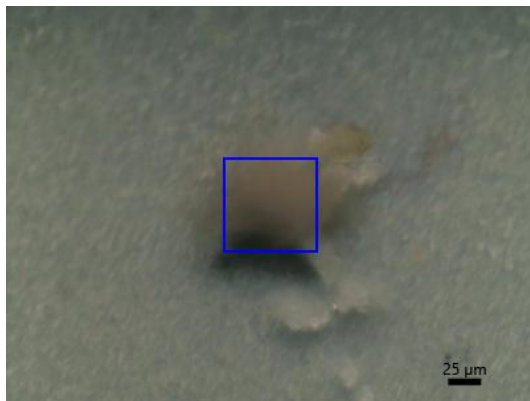

## Search Result Report

---

Filename : C:\Users\User\Desktop\UTSA samples\DR042821HA32\Point  
 Measurement\_Fragment\_111222\_55.apit  
 Acquired Datetime : 2022/11/12 16:28:54

● **Search Parameters**

Library list :  
 IRs Polymer2  
 ATR-Polymer2  
 T-Polymer2  
 Maximum hits: 200  
 Minimum quality : 0  
 Algorithm : DiffDeriv

| Score | Library      | Name  | Comment                             |
|-------|--------------|-------|-------------------------------------|
| 593   | ATR-Polymer2 | D_P11 | Polyimide(UPILEX)<br>DuraSamplIR-II |

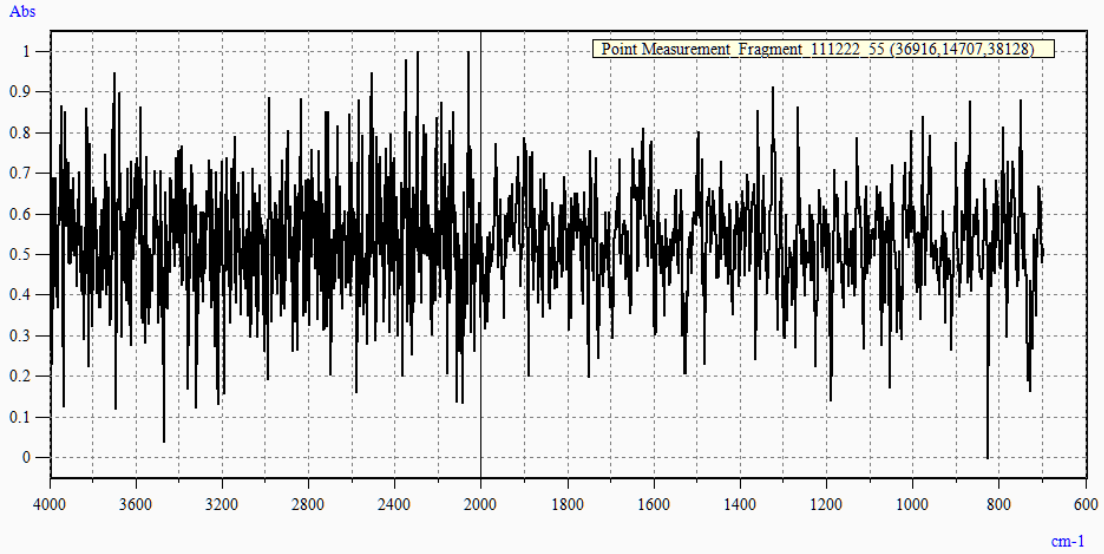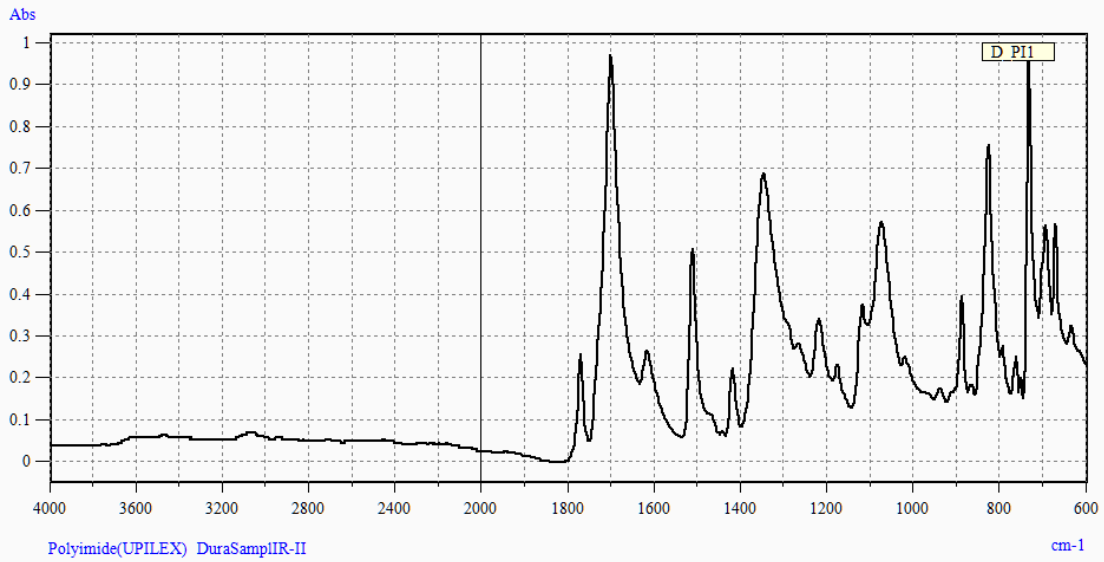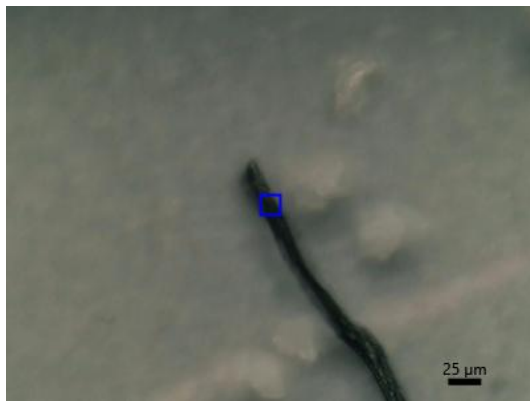

## Search Result Report

---

Filename : C:\Users\User\Desktop\UTSA samples\DR042821HA32\Point  
 Measurement\_Fragment\_111222\_56.apit  
 Acquired Datetime : 2022/11/12 16:36:15

● **Search Parameters**

Library list :  
 IRs Polymer2  
 ATR-Polymer2  
 T-Polymer2  
 Maximum hits: 200  
 Minimum quality : 0  
 Algorithm : DiffDeriv

| Score | Library      | Name  | Comment                                |
|-------|--------------|-------|----------------------------------------|
| 599   | IRs Polymer2 | RAMIE | Ramie FiberATR/diamond<br>ATRcorrected |

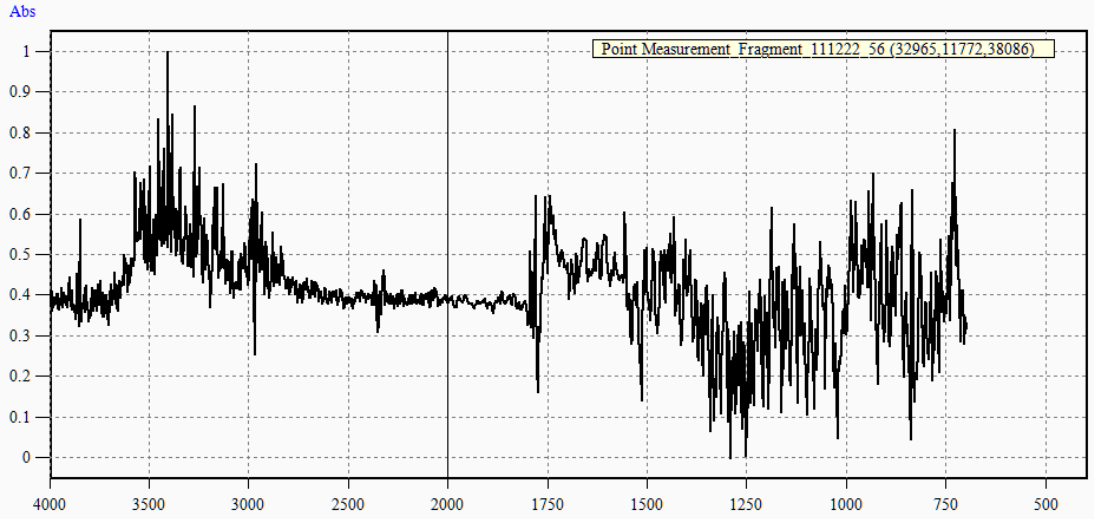

cm-1

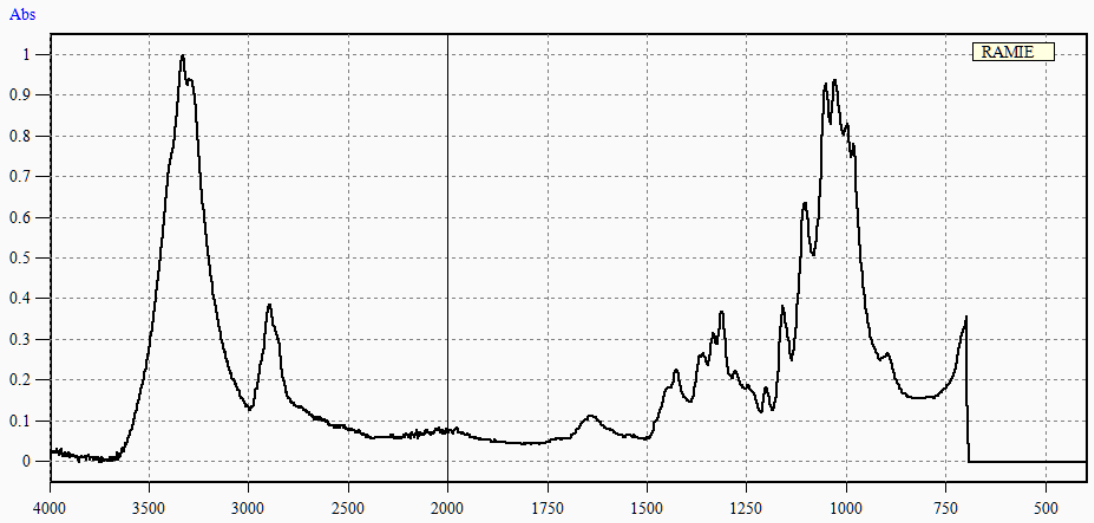

Ramie FiberATR/diamond ATRcorrected

cm-1

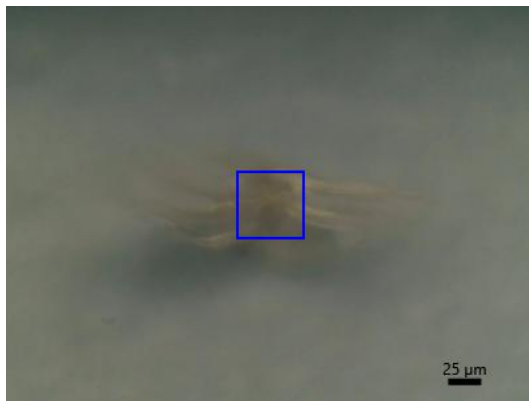

## Search Result Report

---

Filename : C:\Users\User\Desktop\UTSA samples\DR042821HA32\Point  
 Measurement\_Fragment\_111222\_57.apit  
 Acquired Datetime : 2022/11/12 16:40:40

● **Search Parameters**

Library list :  
 IRs : Polymer2  
 ATR-Polymer2  
 T-Polymer2  
 Maximum hits: 200  
 Minimum quality : 0  
 Algorithm : DiffDeriv

| Score | Library      | Name | Comment                             |
|-------|--------------|------|-------------------------------------|
| 698   | ATR-Polymer2 | D_PC | Polycarbonate(PC)<br>DuraSamplIR-II |

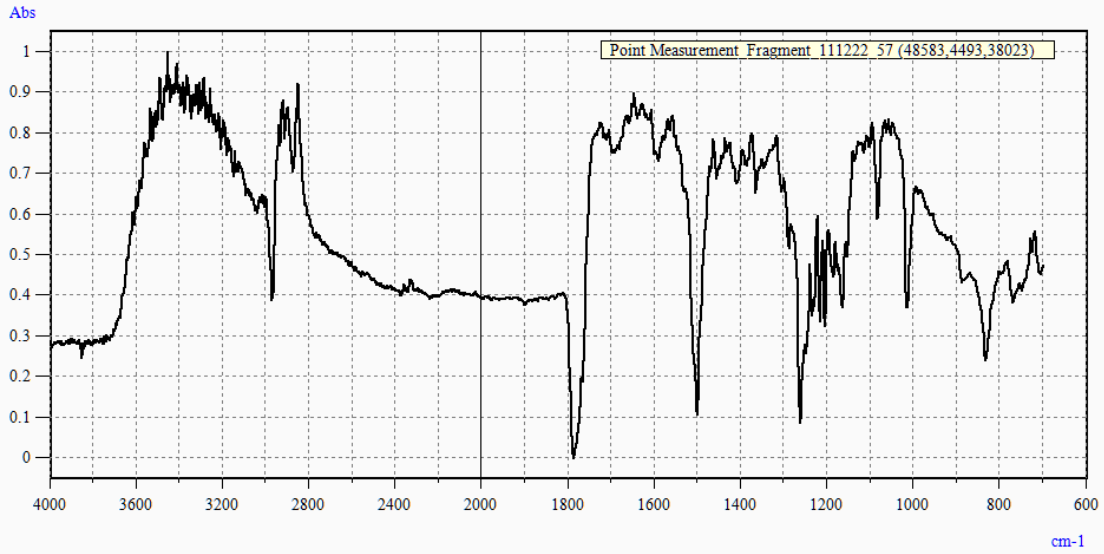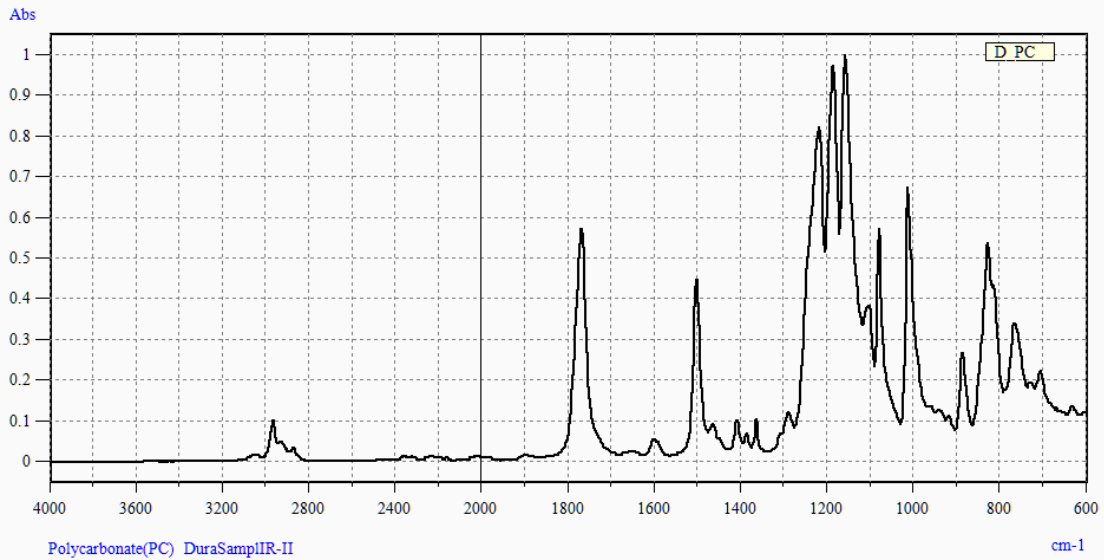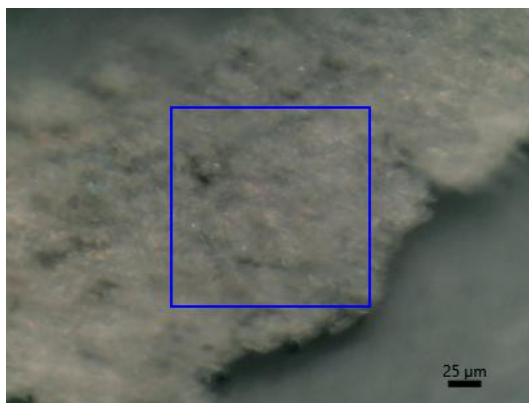

## Search Result Report

---

Filename : C:\Users\User\Desktop\UTSA samples\DR042821HA32\Point  
 Measurement\_Fragment\_111222\_58.apit  
 Acquired Datetime : 2022/11/12 16:44:49

● **Search Parameters**

Library list :  
 IRs : Polymer2  
 ATR-Polymer2  
 T-Polymer2  
 Maximum hits: 200  
 Minimum quality : 0  
 Algorithm : DiffDeriv

| Score | Library      | Name     | Comment                                                               |
|-------|--------------|----------|-----------------------------------------------------------------------|
| 603   | ATR-Polymer2 | D_PC-PBT | Polycarbonate/Polybutylene<br>Terephthalate(PC/PBT)<br>DuraSamplIR-II |

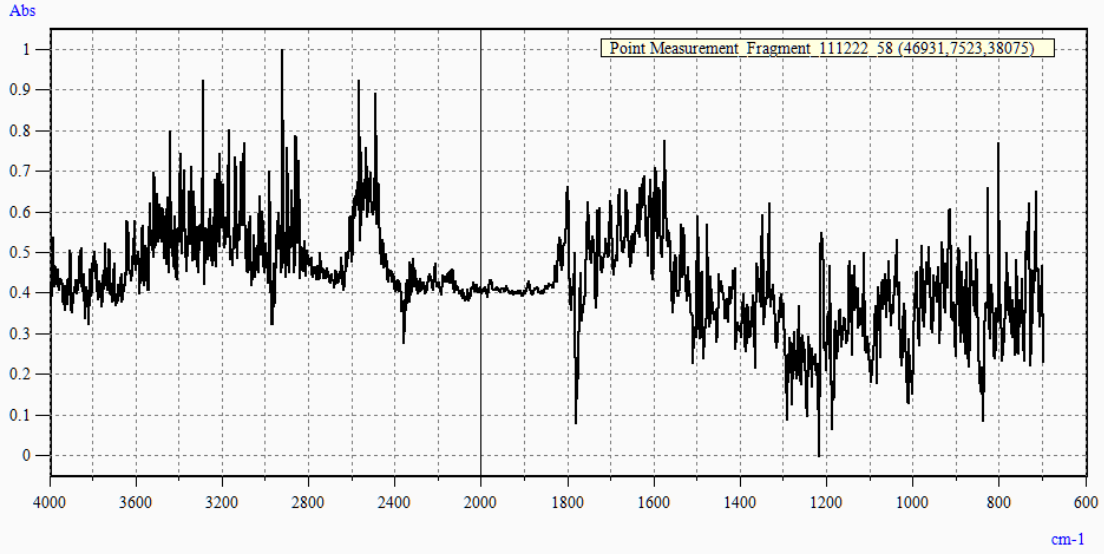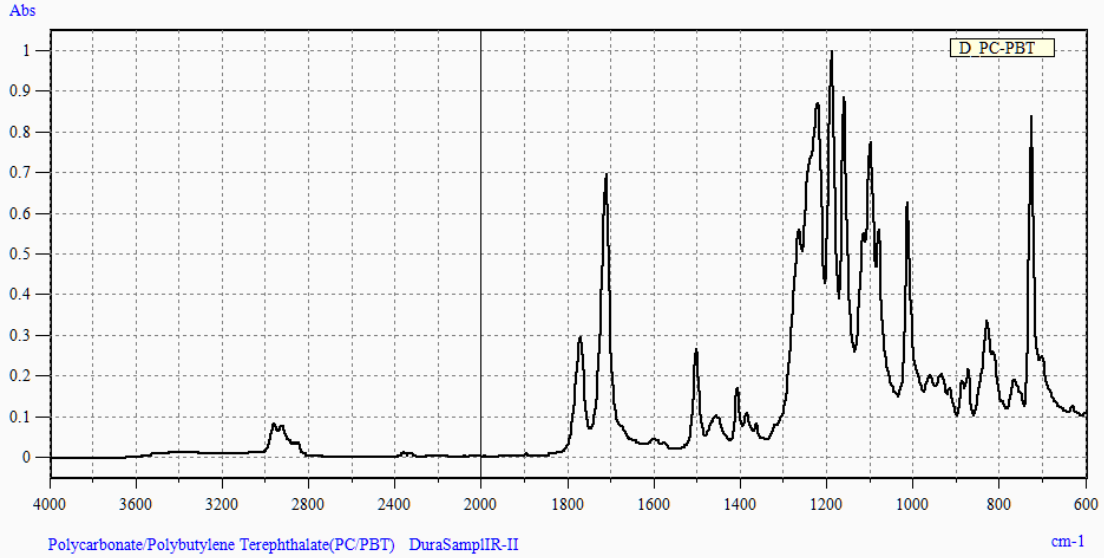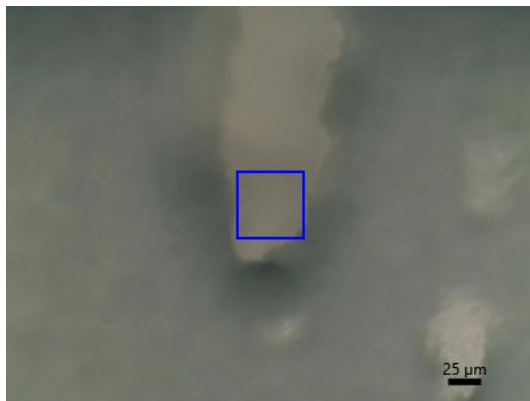

## Search Result Report

Filename : C:\Users\User\Desktop\UTSA samples\DR042821HA32\Point  
 Measurement\_Fragment\_111222\_59.apit  
 Acquired Datetime : 2022/11/12 16:48:16

● **Search Parameters**

Library list :  
 IRs Polymer2  
 ATR-Polymer2  
 T-Polymer2  
 Maximum hits: 200  
 Minimum quality : 0  
 Algorithm : DiffDeriv

| Score | Library      | Name     | Comment                    |
|-------|--------------|----------|----------------------------|
| 626   | ATR-Polymer2 | D_Epoxy5 | Epoxy Resin DuraSamplIR-II |

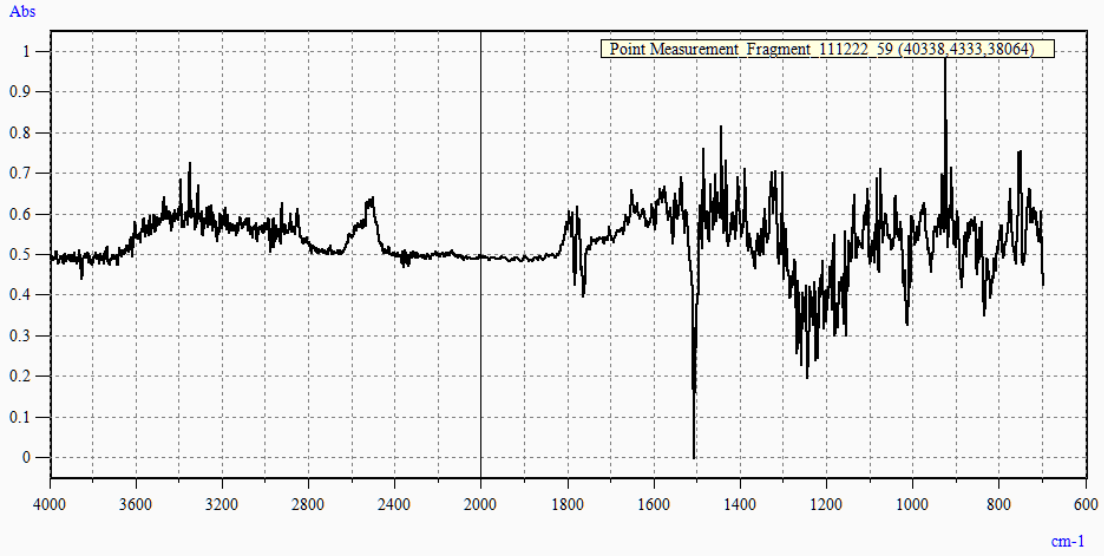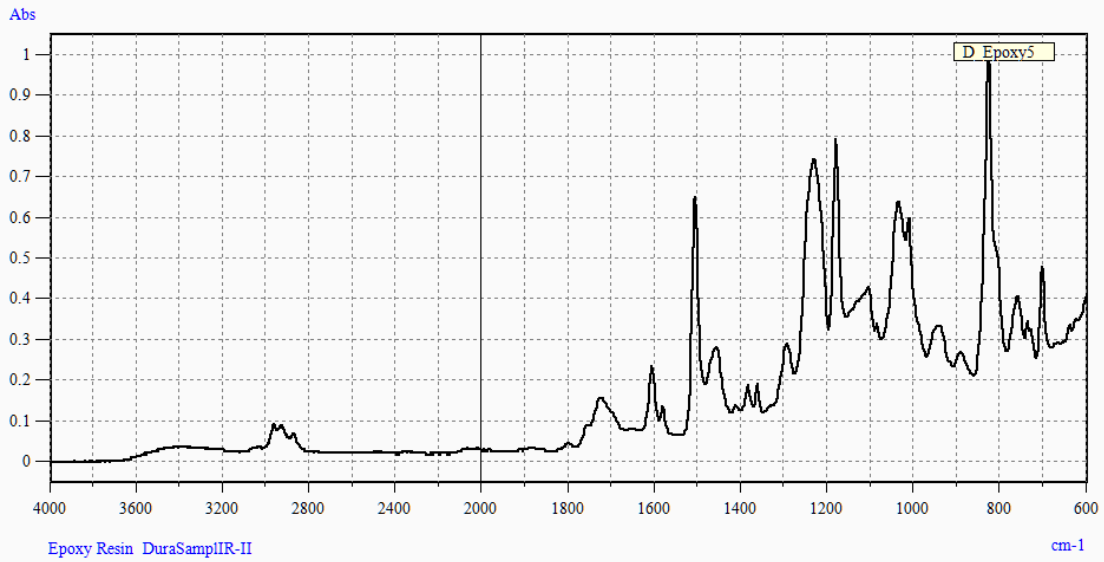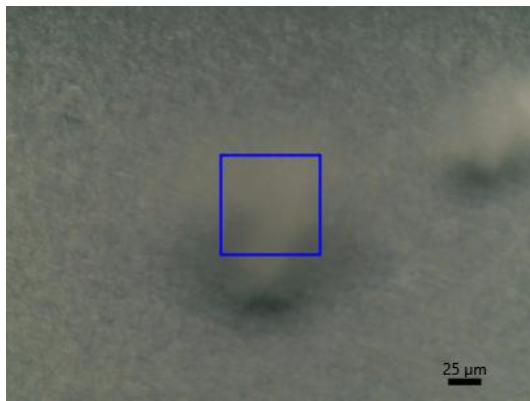

## Search Result Report

---

Filename : C:\Users\User\Desktop\UTSA samples\DR042821HA32\Point  
 Measurement\_Fragment\_111222\_60.apit  
 Acquired Datetime : 2022/11/12 16:52:58

● **Search Parameters**

Library list :  
 IRs Polymer2  
 ATR-Polymer2  
 T-Polymer2  
 Maximum hits: 200  
 Minimum quality : 0  
 Algorithm : DiffDeriv

| Score | Library      | Name | Comment                               |
|-------|--------------|------|---------------------------------------|
| 598   | IRs Polymer2 | PB   | PolybuteneATR/diamond<br>ATRcorrected |

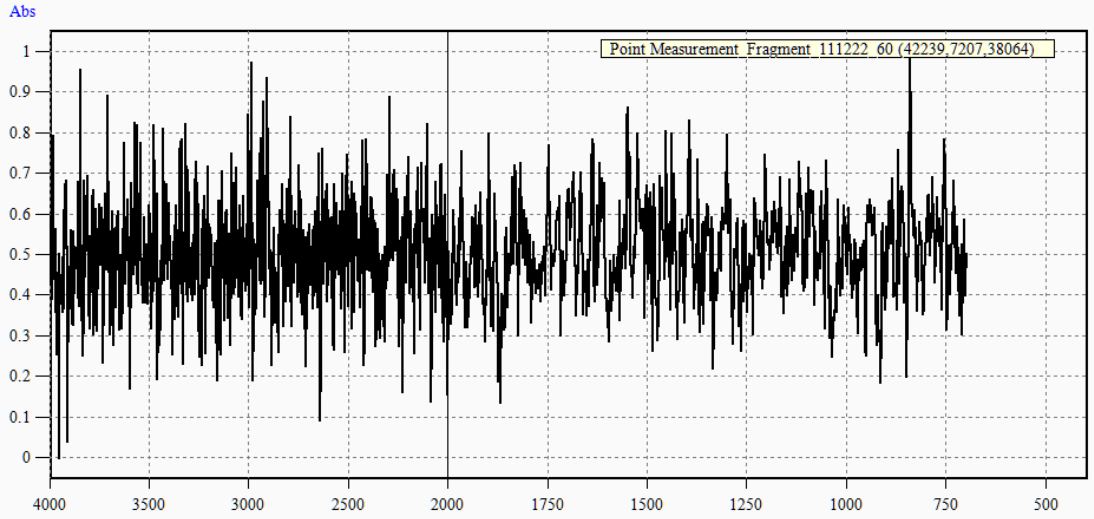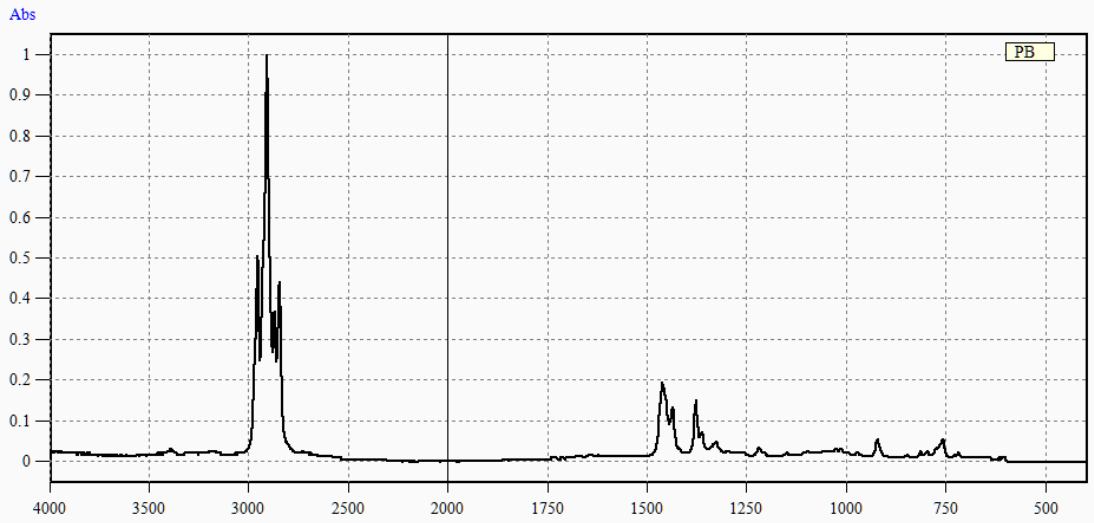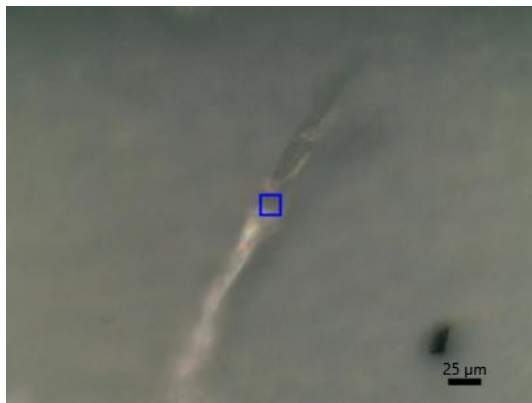

## Search Result Report

---

Filename : C:\Users\User\Desktop\UTSA samples\DR042821HA32\Point  
 Measurement\_Fragment\_111222\_61.apit  
 Acquired Datetime : 2022/11/12 16:57:13

● **Search Parameters**

Library list :  
 IRs Polymer2  
 ATR-Polymer2  
 T-Polymer2  
 Maximum hits: 200  
 Minimum quality : 0  
 Algorithm : DiffDeriv

| Score | Library    | Name | Comment                                       |
|-------|------------|------|-----------------------------------------------|
| 613   | T-Polymer2 | PC   | Polycarbonate(PC)<br>Transmission(Microscope) |

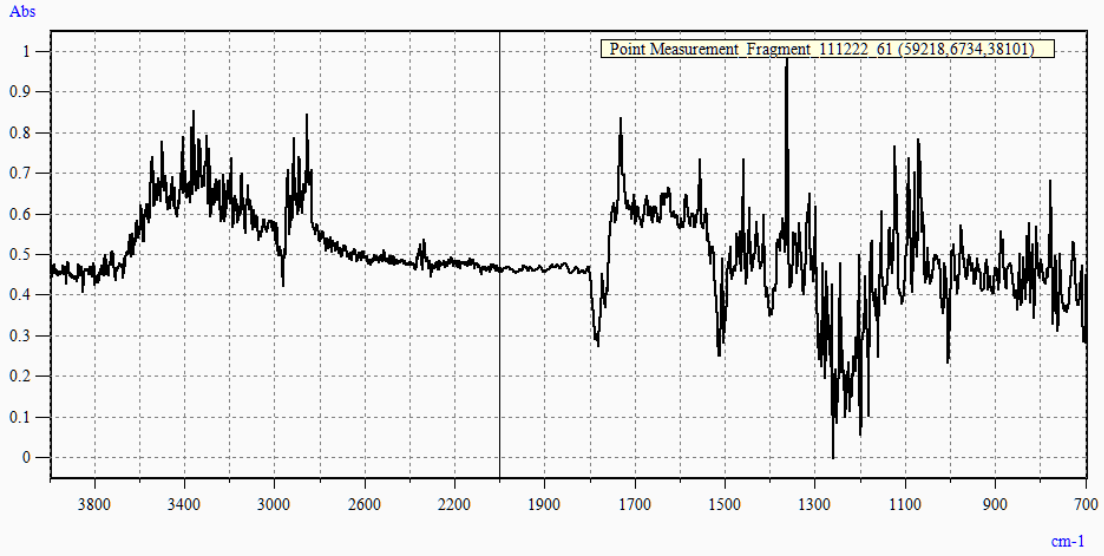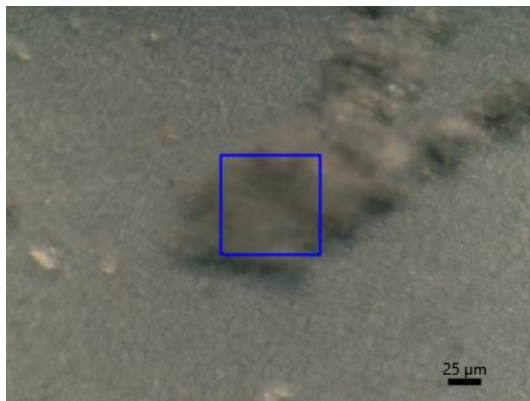

## Search Result Report

---

Filename : C:\Users\User\Desktop\UTSA samples\DR042821HA32\Point  
 Measurement\_Fragment\_111222\_62.apit  
 Acquired Datetime : 2022/11/12 17:02:46

● **Search Parameters**

Library list :  
 IRs Polymer2  
 ATR-Polymer2  
 T-Polymer2  
 Maximum hits: 200  
 Minimum quality : 0  
 Algorithm : DiffDeriv

| Score | Library      | Name | Comment  |
|-------|--------------|------|----------|
| 590   | IRs Polymer2 | PPS  | PPS Film |

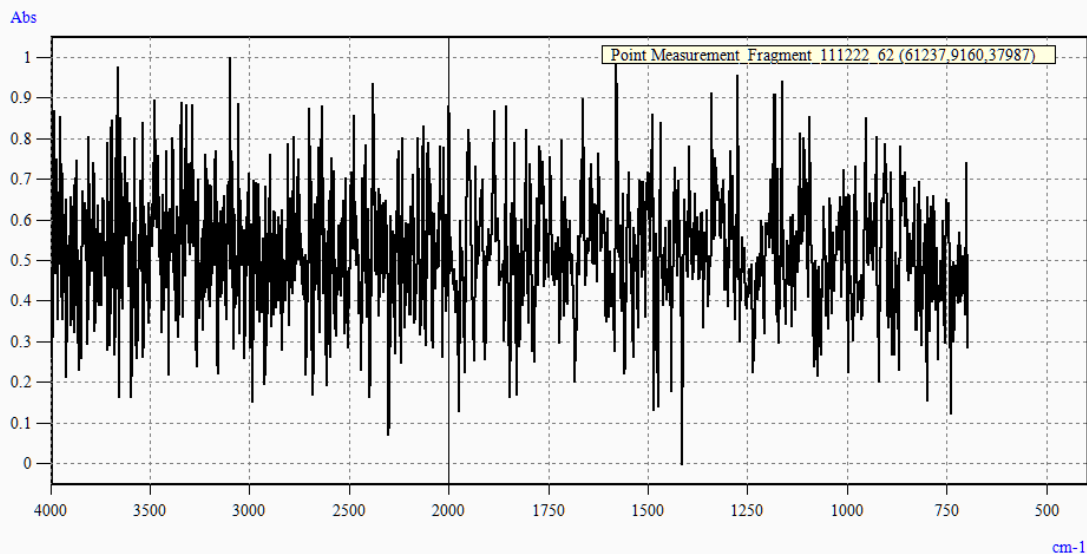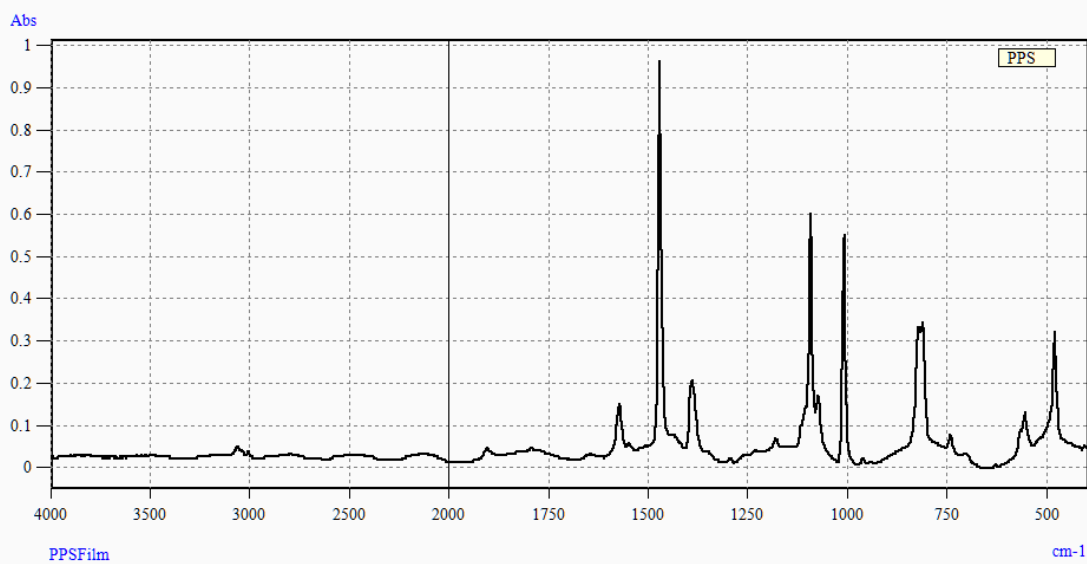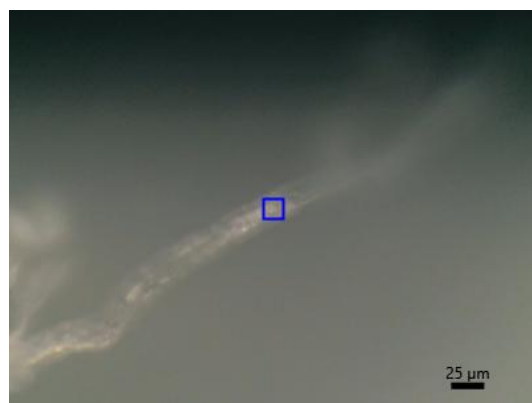

## Search Result Report

---

Filename : C:\Users\User\Desktop\UTSA samples\DR041120HE02\Point  
 Measurement\_fragment\_59.apit  
 Acquired Datetime : 2022/11/11 18:00:26

### ● Search Parameters

Library list :  
 IRs Polymer2  
 ATR-Polymer2  
 T-Polymer2  
 Maximum hits: 200  
 Minimum quality : 0  
 Algorithm : DiffDeriv

| Score | Library    | Name  | Comment                                       |
|-------|------------|-------|-----------------------------------------------|
| 659   | T-Polymer2 | T_PC2 | Polycarbonate(PC)<br>Transmission(Microscope) |

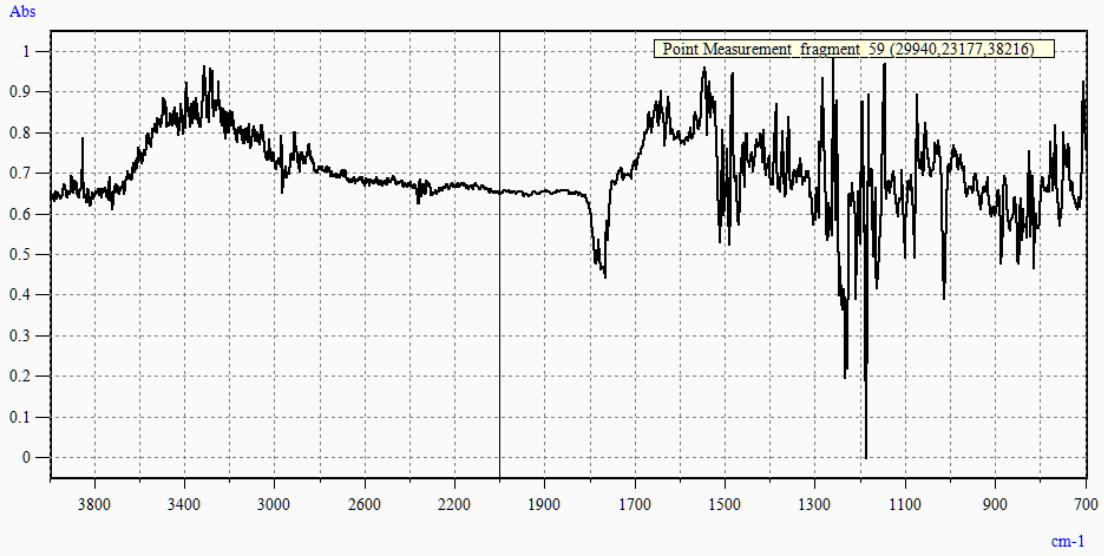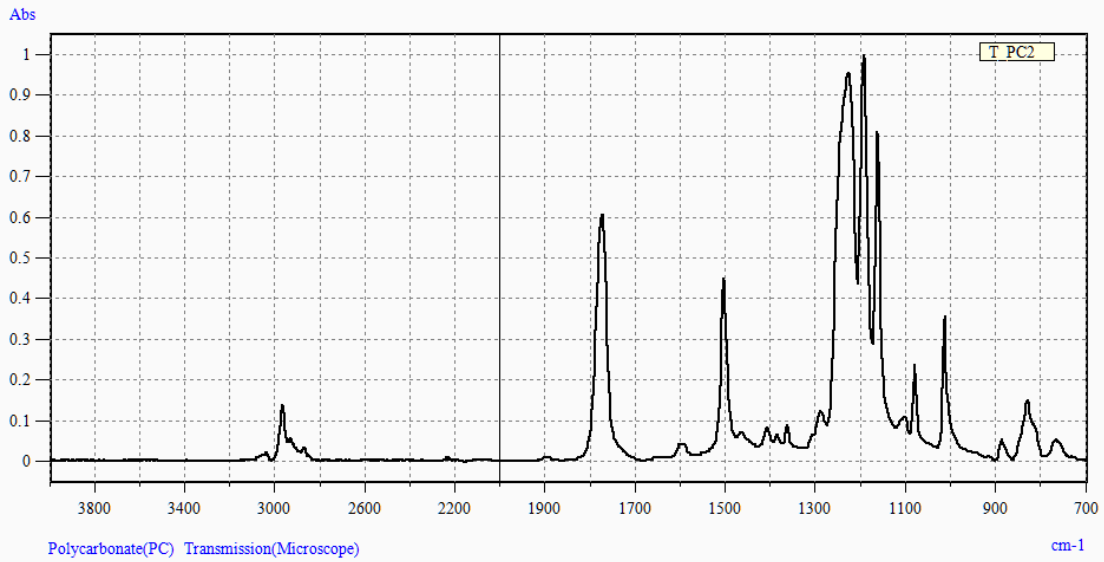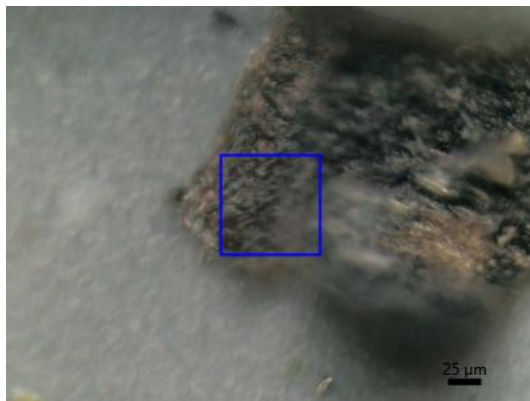

## Search Result Report

---

Filename : C:\Users\User\Desktop\UTSA samples\DR041120HE02\Point  
 Measurement\_fragment\_60.apit  
 Acquired Datetime : 2022/11/11 18:05:34

● **Search Parameters**

Library list :  
 IRs Polymer2  
 ATR-Polymer2  
 T-Polymer2  
 Maximum hits: 200  
 Minimum quality : 0  
 Algorithm : DiffDeriv

| Score | Library      | Name    | Comment                                                                                                           |
|-------|--------------|---------|-------------------------------------------------------------------------------------------------------------------|
| 596   | IRs Polymer2 | PETG-20 | POLYETHYLENE<br>GLYCOLORIGIN Date: 92/04/09<br>File: PETG-20.DXINFRARED<br>SPECTROPHOTOMETER FTIR-<br>8000 SERIES |

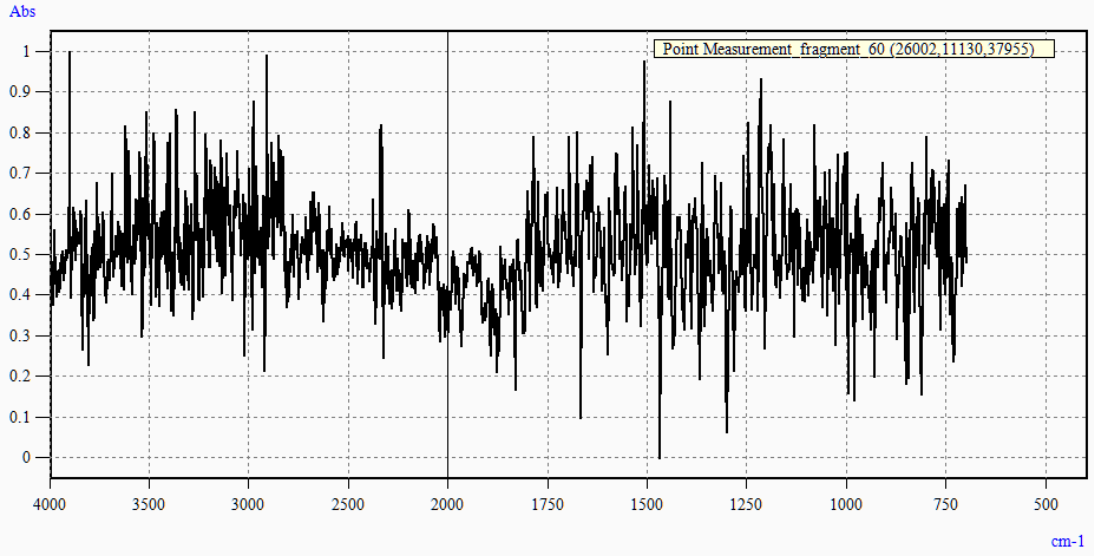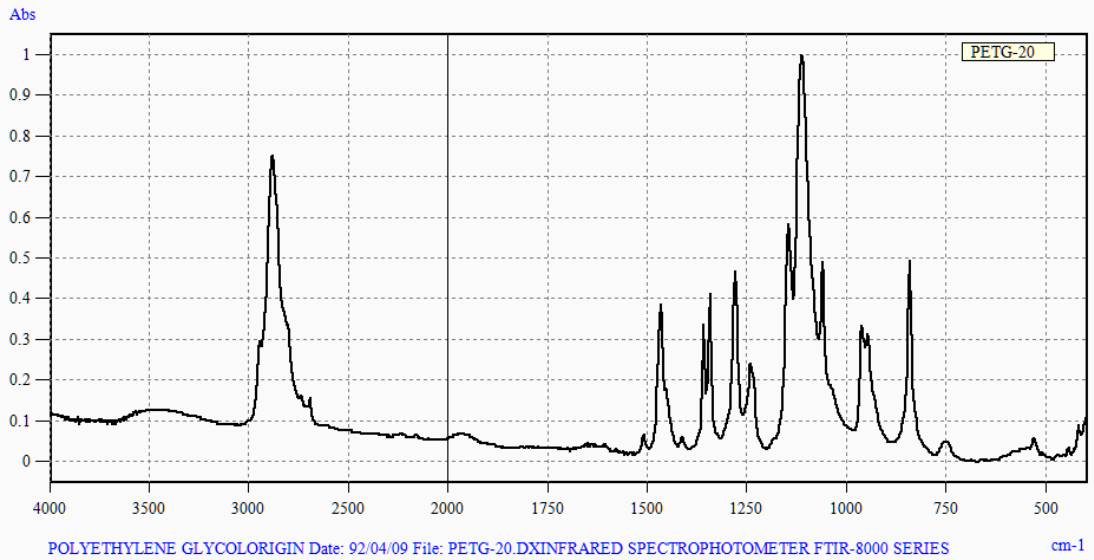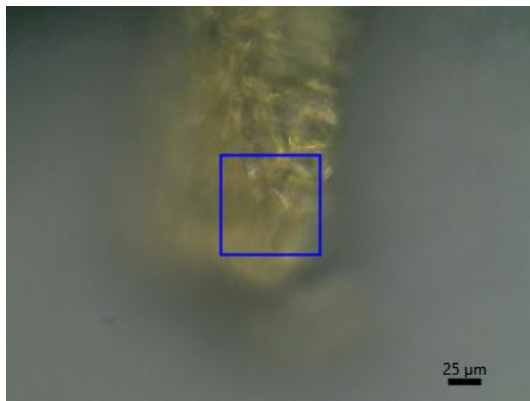

## Search Result Report

---

Filename : C:\Users\User\Desktop\UTSA samples\DR041120HE02\Point  
 Measurement\_fragment\_61.apit  
 Acquired Datetime : 2022/11/11 18:09:12

● **Search Parameters**

Library list :  
 IRs Polymer2  
 ATR-Polymer2  
 T-Polymer2  
 Maximum hits: 200  
 Minimum quality : 0  
 Algorithm : DiffDeriv

| Score | Library      | Name                | Comment                             |
|-------|--------------|---------------------|-------------------------------------|
| 606   | ATR-Polymer2 | D_1_2_Polybutadiene | 1,2-Polybutadiene<br>DuraSamplIR-II |

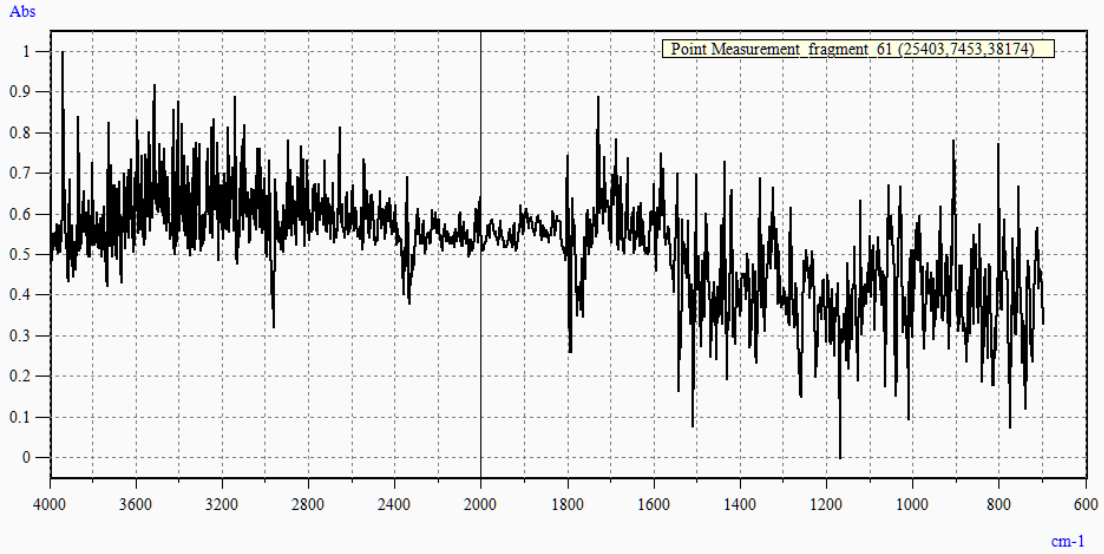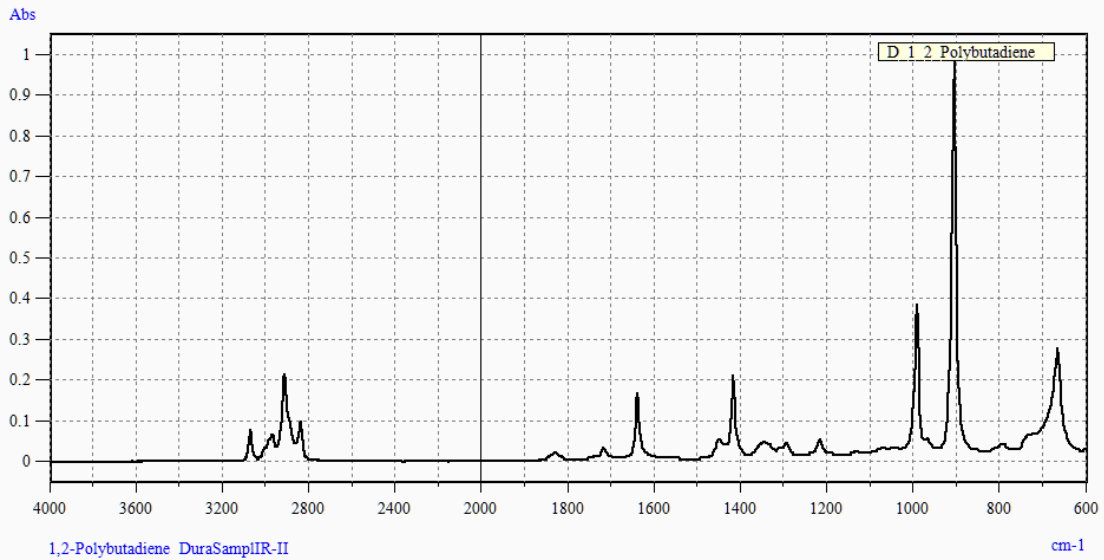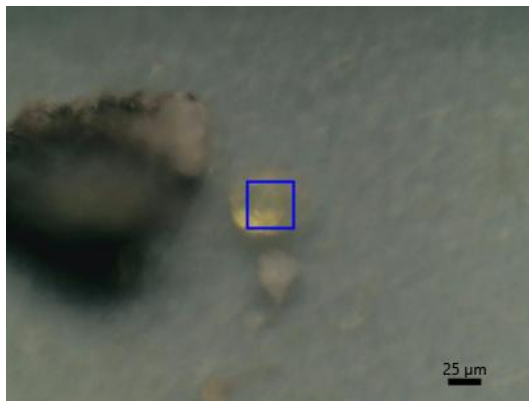

## Search Result Report

---

Filename : C:\Users\User\Desktop\UTSA samples\DR041120HE02\Point  
 Measurement\_fragment\_62.apit  
 Acquired Datetime : 2022/11/11 18:12:28

● **Search Parameters**

Library list :  
 IRs Polymer2  
 ATR-Polymer2  
 T-Polymer2  
 Maximum hits: 200  
 Minimum quality : 0  
 Algorithm : DiffDeriv

| Score | Library    | Name           | Comment                                    |
|-------|------------|----------------|--------------------------------------------|
| 621   | T-Polymer2 | Silicon Grease | Silicon Grease<br>Transmission(Microscope) |

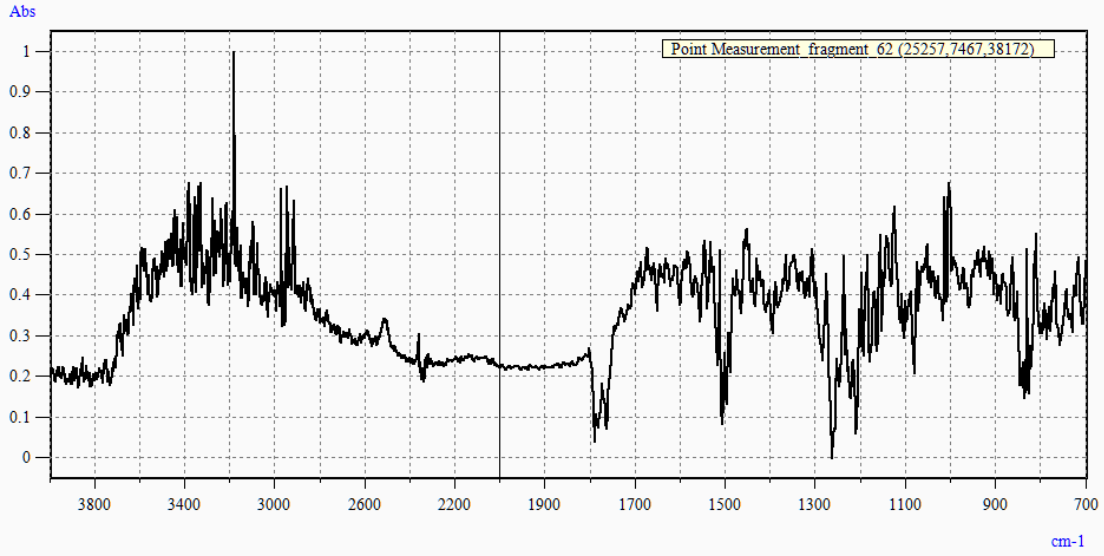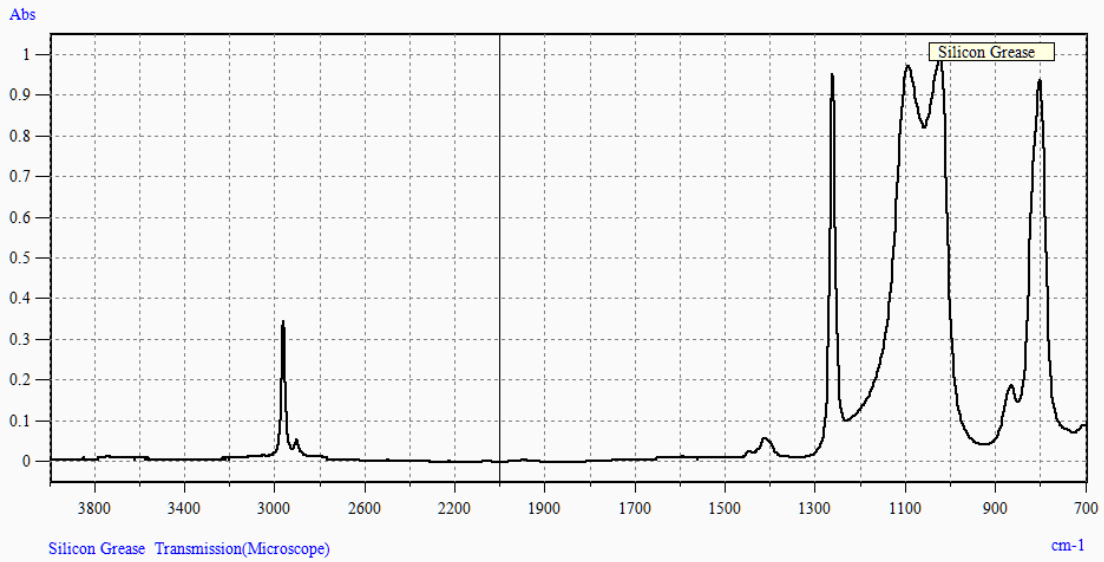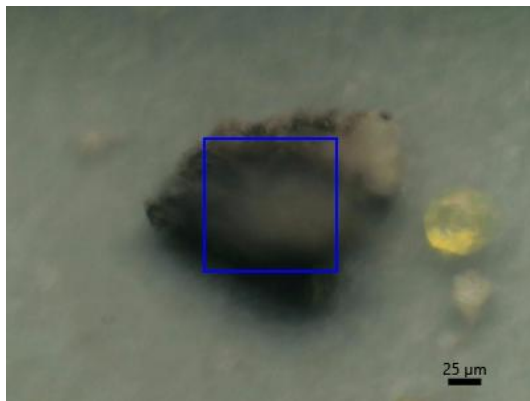

## Search Result Report

---

Filename : C:\Users\User\Desktop\UTSA samples\DR041120HE02\Point  
 Measurement\_fragment\_63.apit  
 Acquired Datetime : 2022/11/11 18:16:53

● **Search Parameters**

Library list :  
 IRs Polymer2  
 ATR-Polymer2  
 T-Polymer2  
 Maximum hits: 200  
 Minimum quality : 0  
 Algorithm : DiffDeriv

| Score | Library    | Name | Comment                                       |
|-------|------------|------|-----------------------------------------------|
| 635   | T-Polymer2 | PC   | Polycarbonate(PC)<br>Transmission(Microscope) |

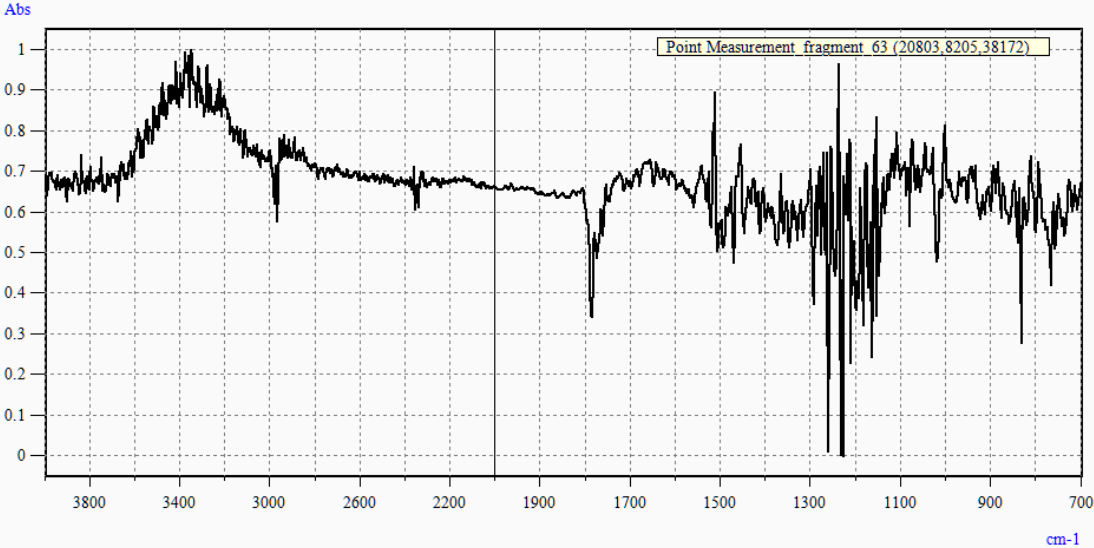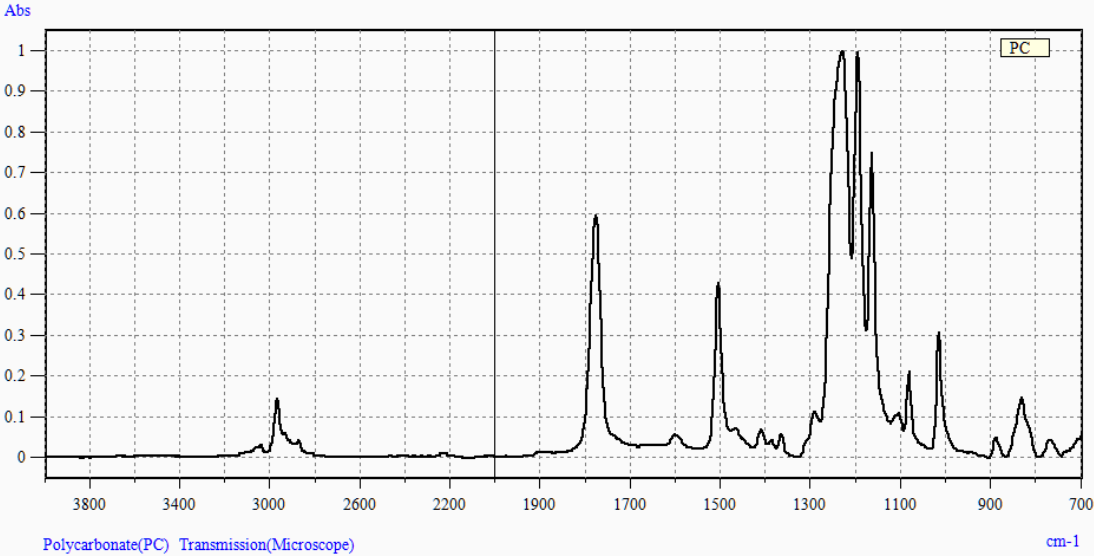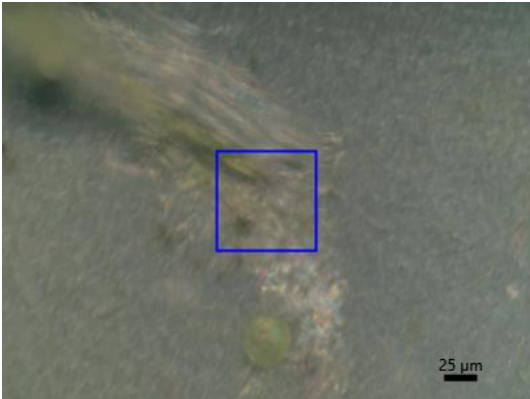

## Search Result Report

---

Filename : C:\Users\User\Desktop\UTSA samples\DR041120HE02\Point  
 Measurement\_fragment\_64.apit  
 Acquired Datetime : 2022/11/11 18:22:20

● **Search Parameters**

Library list :  
 IRs Polymer2  
 ATR-Polymer2  
 T-Polymer2  
 Maximum hits: 200  
 Minimum quality : 0  
 Algorithm : DiffDeriv

| Score | Library      | Name                 | Comment                                     |
|-------|--------------|----------------------|---------------------------------------------|
| 576   | ATR-Polymer2 | D_Polyethyleneglycol | Polyethylene Glycol 20000<br>DuraSamplIR-II |

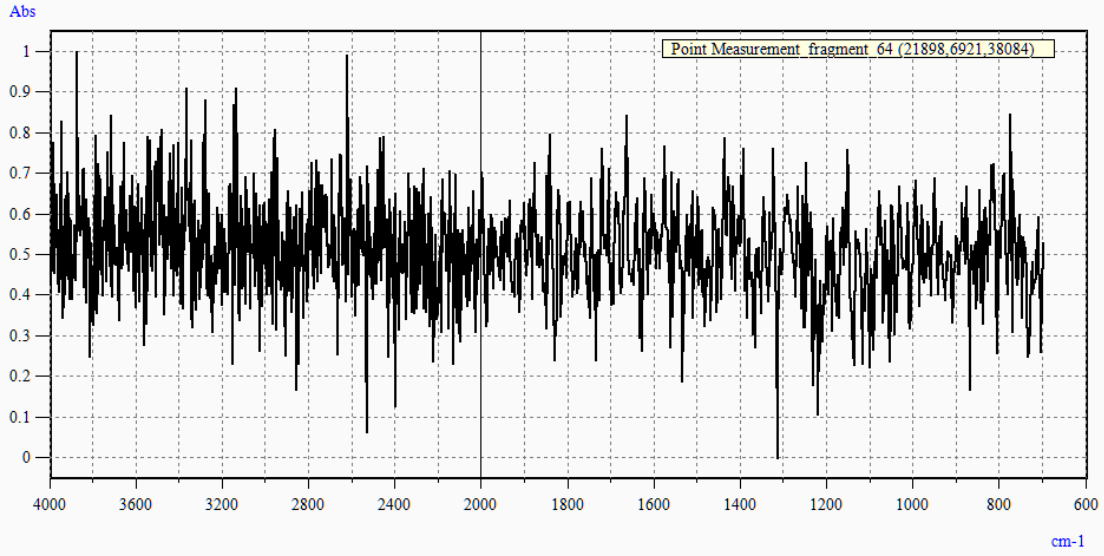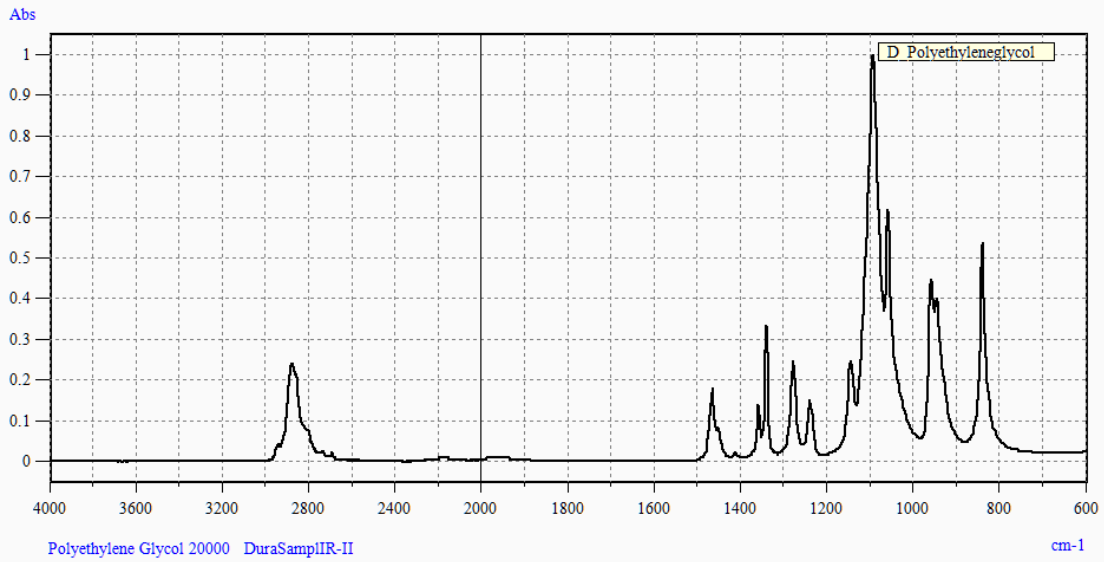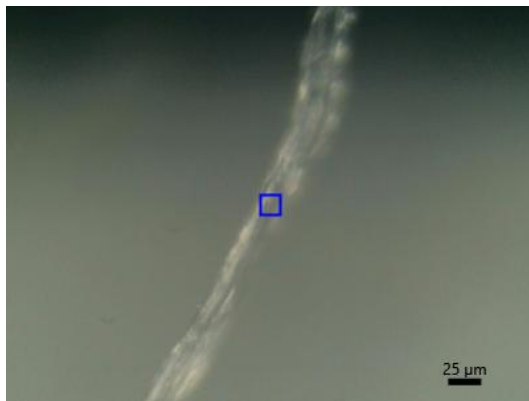

## Search Result Report

---

Filename : C:\Users\User\Desktop\UTSA samples\DR041120HE02\Point  
 Measurement\_fragment\_65.apit  
 Acquired Datetime : 2022/11/11 18:27:47

● **Search Parameters**

Library list :  
 IRs Polymer2  
 ATR-Polymer2  
 T-Polymer2  
 Maximum hits: 200  
 Minimum quality : 0  
 Algorithm : DiffDeriv

| Score | Library      | Name  | Comment                             |
|-------|--------------|-------|-------------------------------------|
| 695   | ATR-Polymer2 | D_PC2 | Polycarbonate(PC)<br>DuraSamplIR-II |

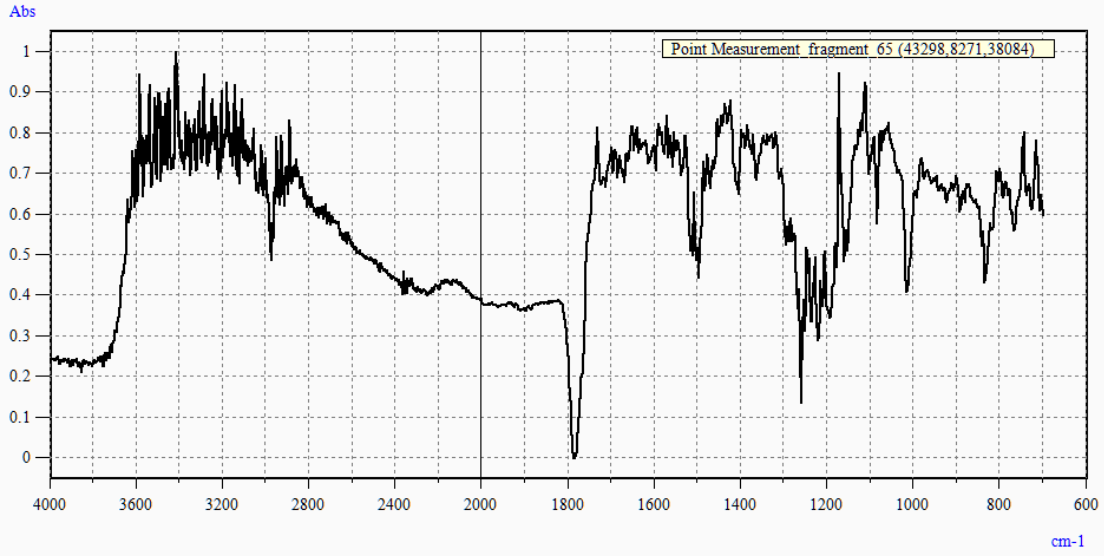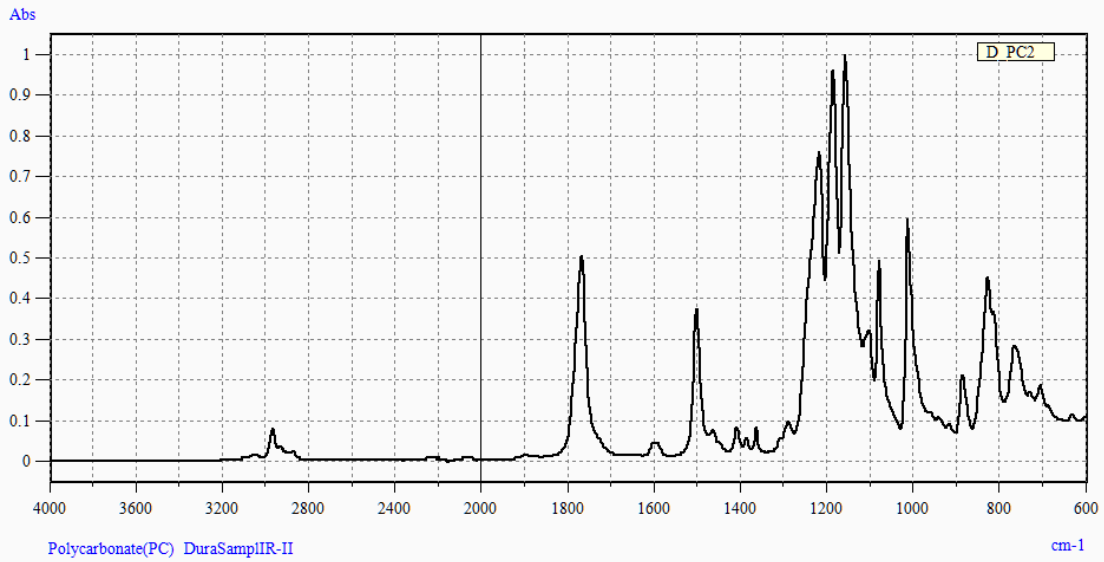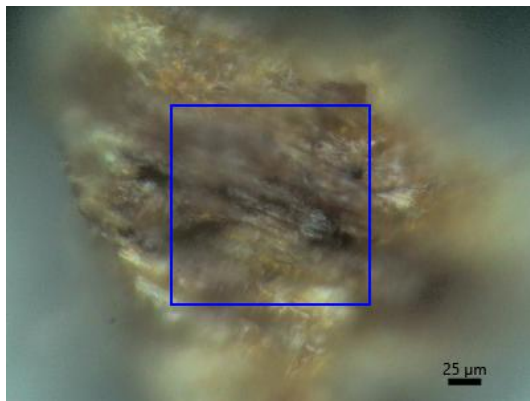

## Search Result Report

---

Filename : C:\Users\User\Desktop\UTSA samples\DR041120HE02\Point  
 Measurement\_fragment\_66.apit  
 Acquired Datetime : 2022/11/11 18:30:21

### ● Search Parameters

Library list :  
 IRs Polymer2  
 ATR-Polymer2  
 T-Polymer2  
 Maximum hits: 200  
 Minimum quality : 0  
 Algorithm : DiffDeriv

| Score | Library      | Name | Comment                             |
|-------|--------------|------|-------------------------------------|
| 708   | ATR-Polymer2 | D_PC | Polycarbonate(PC)<br>DuraSamplIR-II |

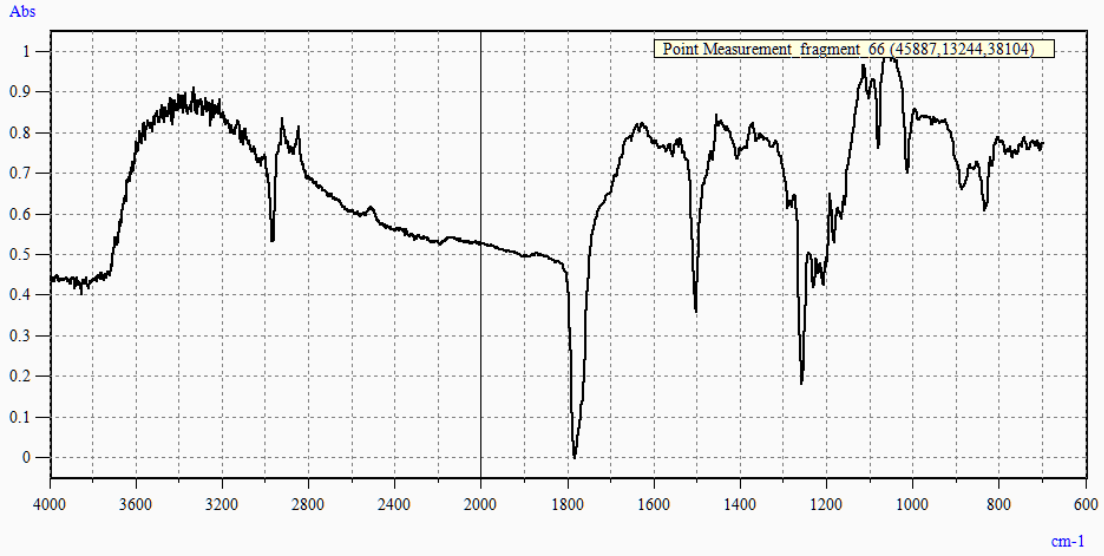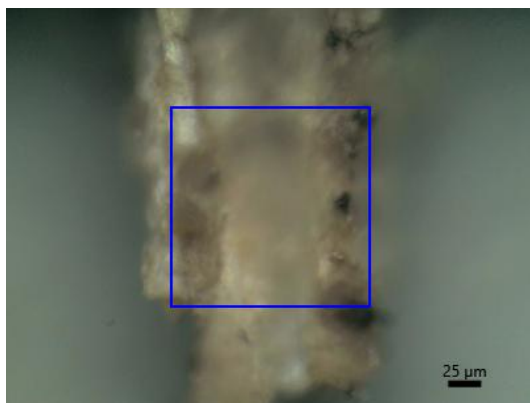

## Search Result Report

---

Filename : C:\Users\User\Desktop\UTSA samples\DR041120HE02\Point  
 Measurement\_fragment\_67.apit  
 Acquired Datetime : 2022/11/11 18:35:39

● **Search Parameters**

Library list :  
 IRs Polymer2  
 ATR-Polymer2  
 T-Polymer2  
 Maximum hits: 200  
 Minimum quality : 0  
 Algorithm : DiffDeriv

| Score | Library    | Name | Comment                                       |
|-------|------------|------|-----------------------------------------------|
| 644   | T-Polymer2 | PC   | Polycarbonate(PC)<br>Transmission(Microscope) |

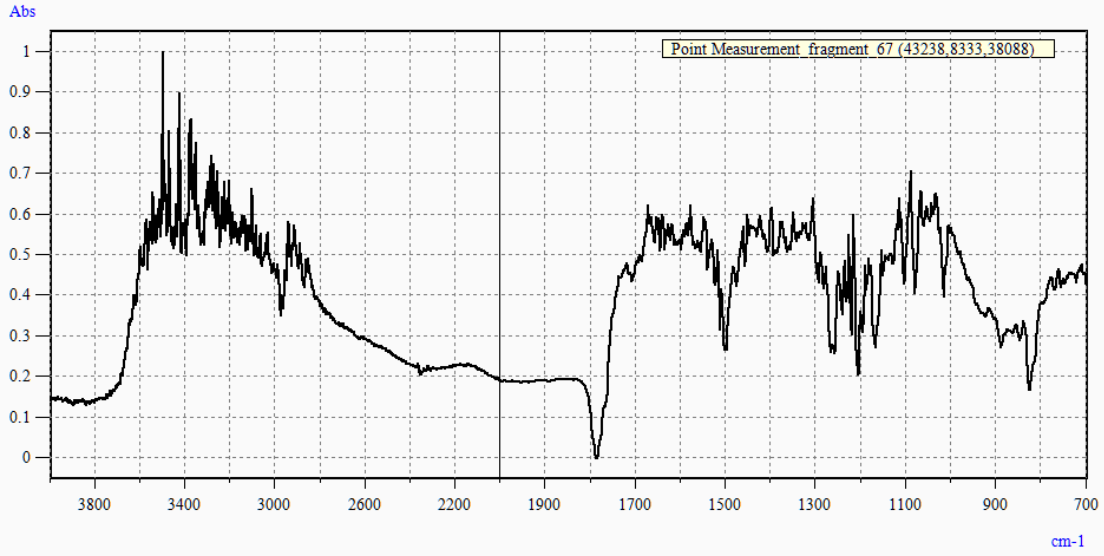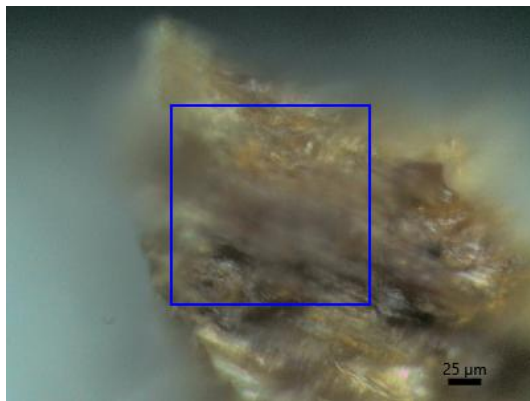

## Search Result Report

---

Filename : C:\Users\User\Desktop\UTSA samples\DR041120HE02\Point  
 Measurement\_fragment\_68.apit  
 Acquired Datetime : 2022/11/11 18:39:19

● **Search Parameters**

Library list :  
 IRs Polymer2  
 ATR-Polymer2  
 T-Polymer2  
 Maximum hits: 200  
 Minimum quality : 0  
 Algorithm : DiffDeriv

| Score | Library      | Name    | Comment                                   |
|-------|--------------|---------|-------------------------------------------|
| 575   | IRs Polymer2 | URETHAN | Polyurethane FormATR/ZnSe<br>ATRcorrected |

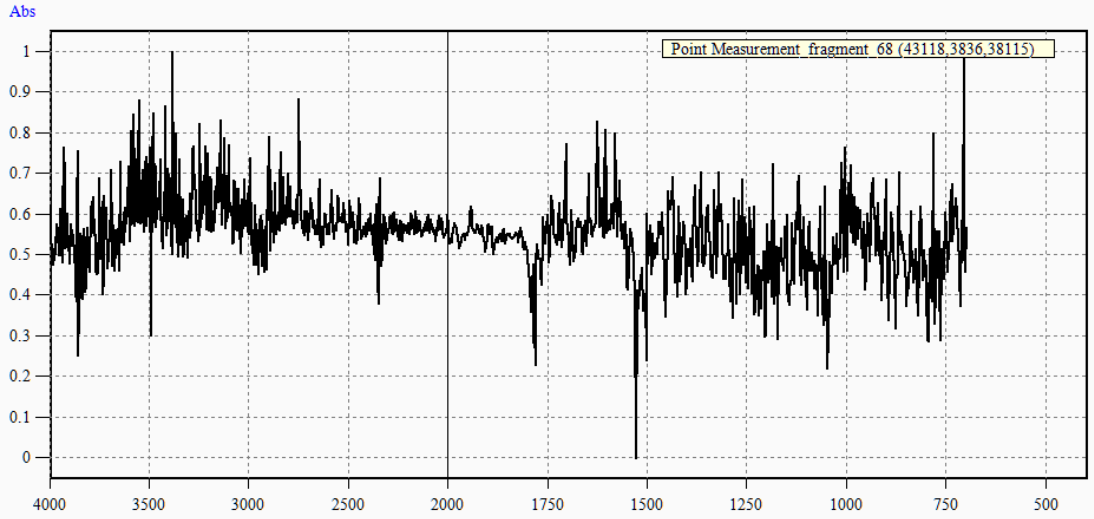

cm-1

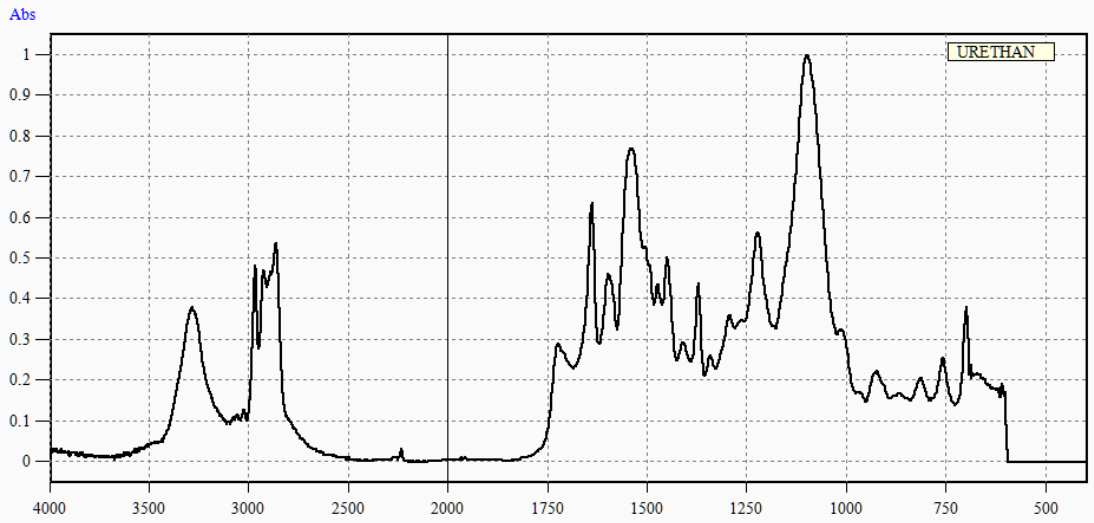

Polyurethane FormATR/ZnSe ATRcorrected

cm-1

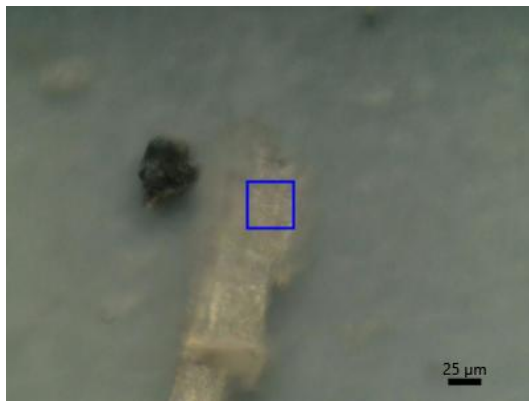

## Search Result Report

---

Filename : C:\Users\User\Desktop\UTSA samples\DR041120HE02\Point  
 Measurement\_fragment\_69.apit  
 Acquired Datetime : 2022/11/11 18:44:54

● **Search Parameters**

Library list :  
 IRs Polymer2  
 ATR-Polymer2  
 T-Polymer2  
 Maximum hits: 200  
 Minimum quality : 0  
 Algorithm : DiffDeriv

| Score | Library      | Name                                     | Comment                                                                              |
|-------|--------------|------------------------------------------|--------------------------------------------------------------------------------------|
| 577   | ATR-Polymer2 | D_ButylMethacrylate_IsobutylMethacrylate | Butyl<br>Methacrylate/Isobutyl<br>Methacrylate<br>Copolymer(50:50)<br>DuraSamplIR-II |

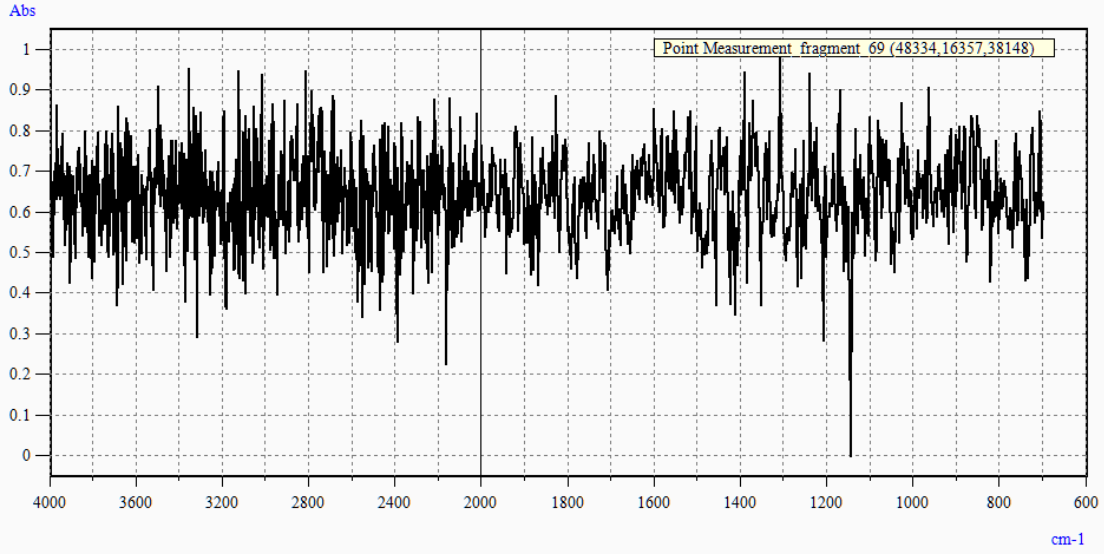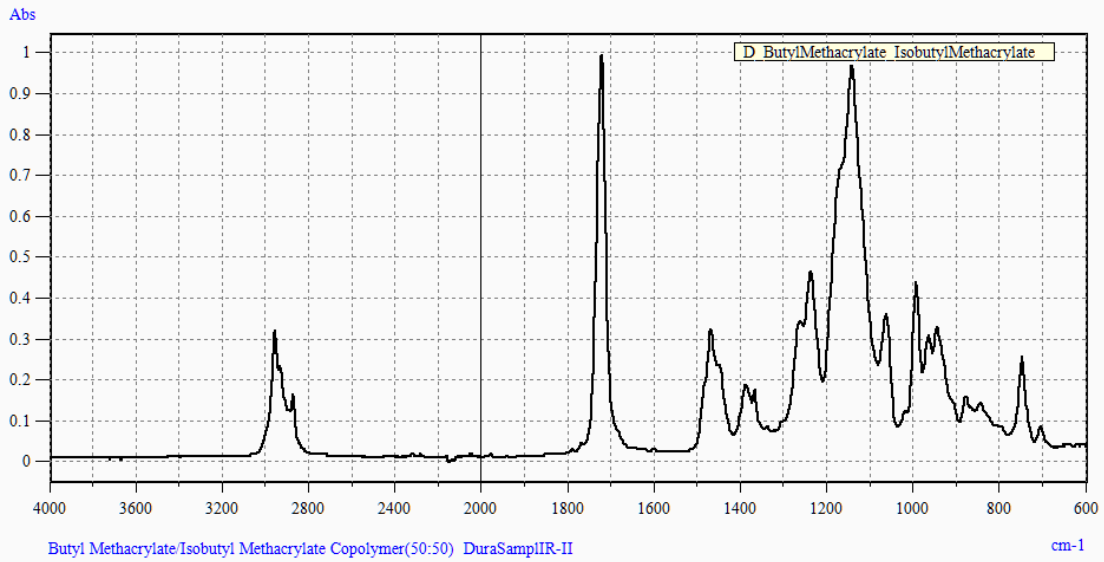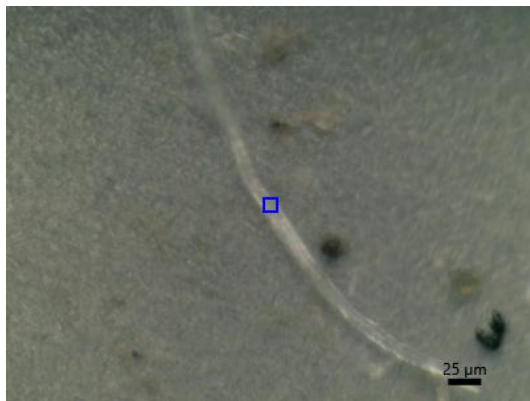

## Search Result Report

---

Filename : C:\Users\User\Desktop\UTSA samples\DR041120HE02\Point  
 Measurement\_fragment\_70.apit  
 Acquired Datetime : 2022/11/11 18:49:48

● **Search Parameters**

Library list :  
 IRs Polymer2  
 ATR-Polymer2  
 T-Polymer2  
 Maximum hits: 200  
 Minimum quality : 0  
 Algorithm : DiffDeriv

| Score | Library      | Name | Comment             |
|-------|--------------|------|---------------------|
| 592   | IRs Polymer2 | PEI  | Poly etherimideFilm |

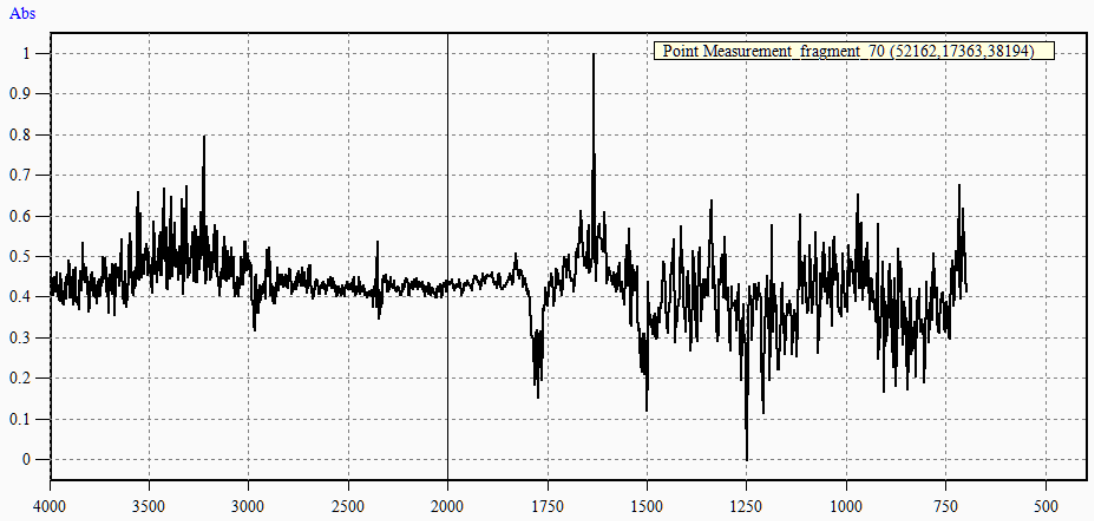

cm-1

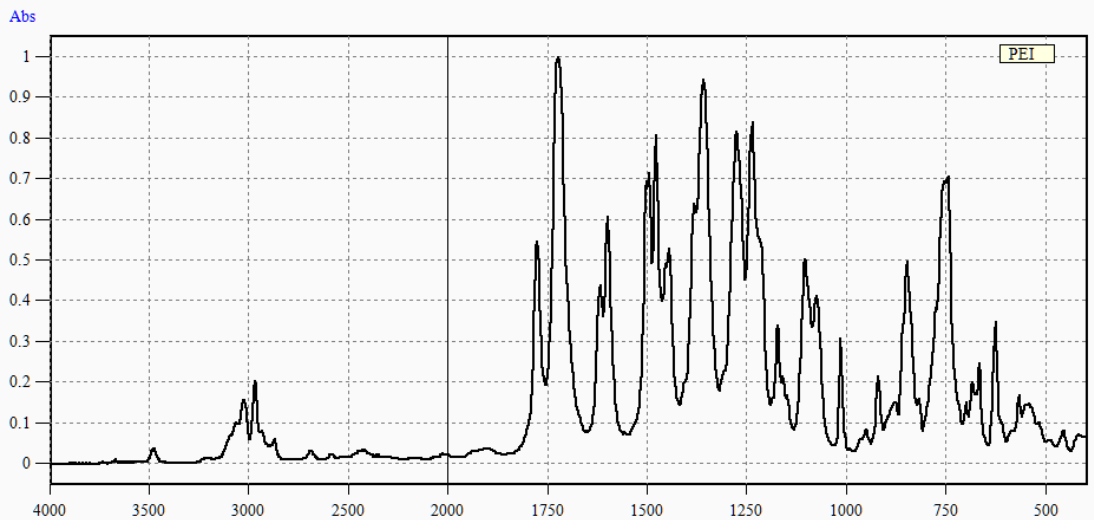

cm-1

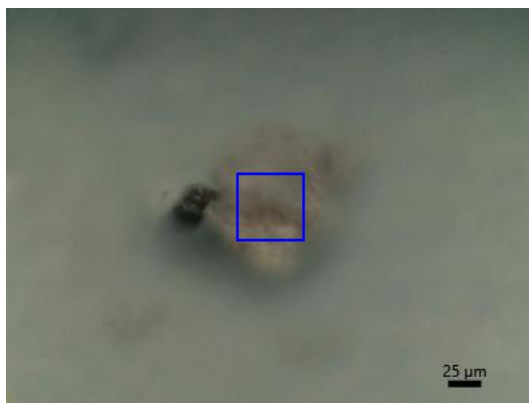

## Search Result Report

---

Filename : C:\Users\User\Desktop\UTSA samples\DR041120HG02\Point  
 Measurement\_fragment\_50.apit  
 Acquired Datetime : 2022/11/11 17:06:05

● **Search Parameters**

Library list :  
 IRs Polymer2  
 ATR-Polymer2  
 T-Polymer2  
 Maximum hits: 200  
 Minimum quality : 0  
 Algorithm : DiffDeriv

| Score | Library      | Name  | Comment                             |
|-------|--------------|-------|-------------------------------------|
| 598   | ATR-Polymer2 | D_PC2 | Polycarbonate(PC)<br>DuraSamplIR-II |

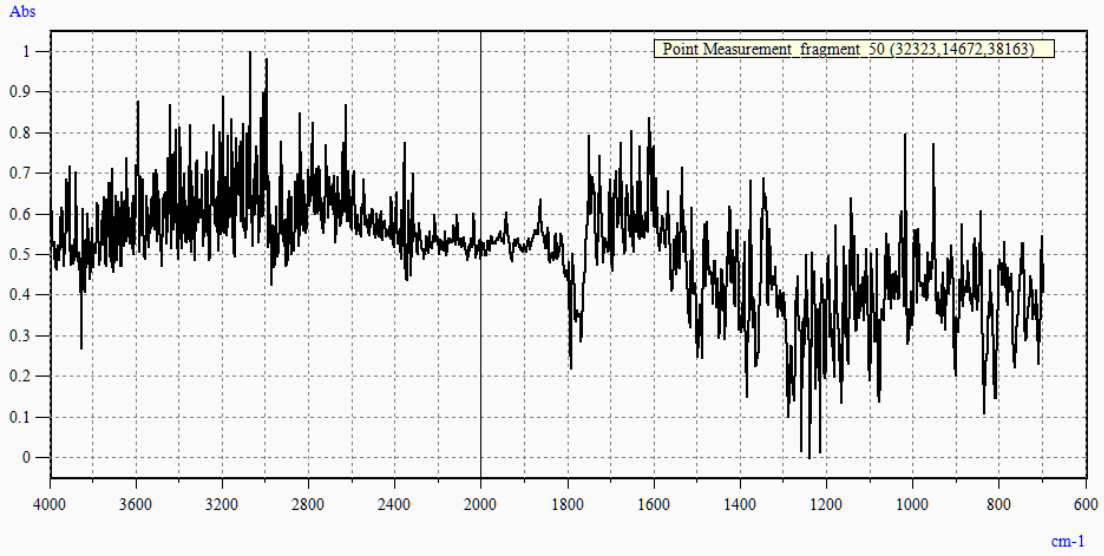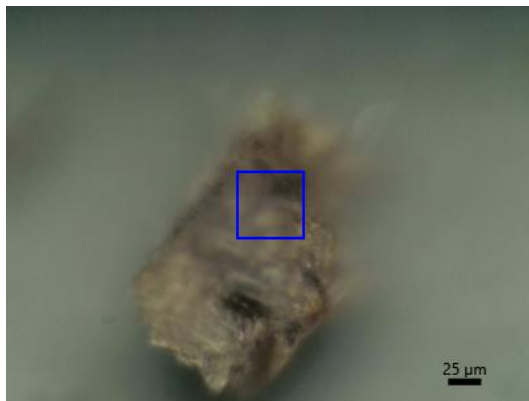

## Search Result Report

---

Filename : C:\Users\User\Desktop\UTSA samples\DR041120HG02\Point  
 Measurement\_fragment\_51.apit  
 Acquired Datetime : 2022/11/11 17:09:17

● **Search Parameters**

Library list :  
 IRs Polymer2  
 ATR-Polymer2  
 T-Polymer2  
 Maximum hits: 200  
 Minimum quality : 0  
 Algorithm : DiffDeriv

| Score | Library      | Name | Comment  |
|-------|--------------|------|----------|
| 601   | IRs Polymer2 | PEEK | PEEKFilm |

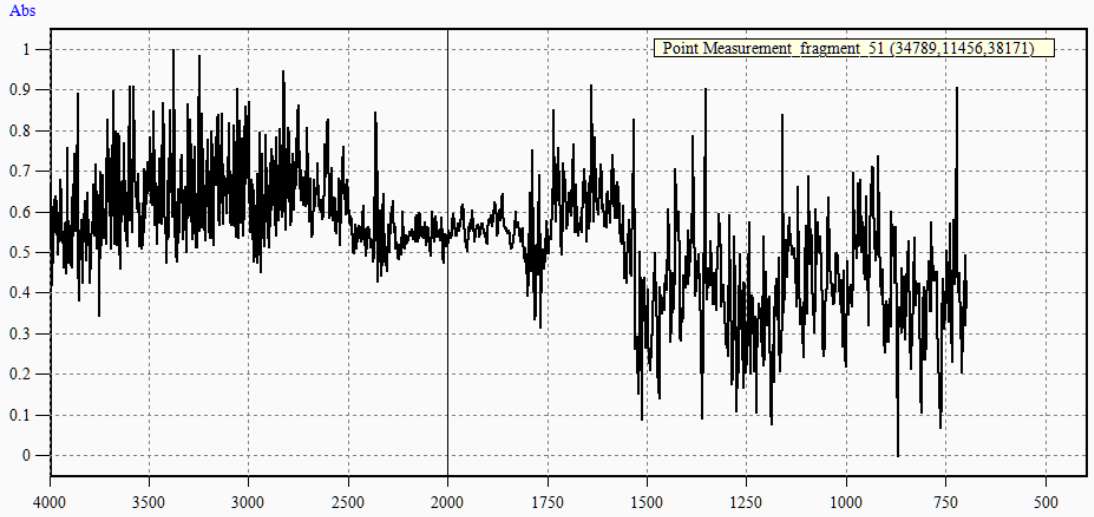

cm-1

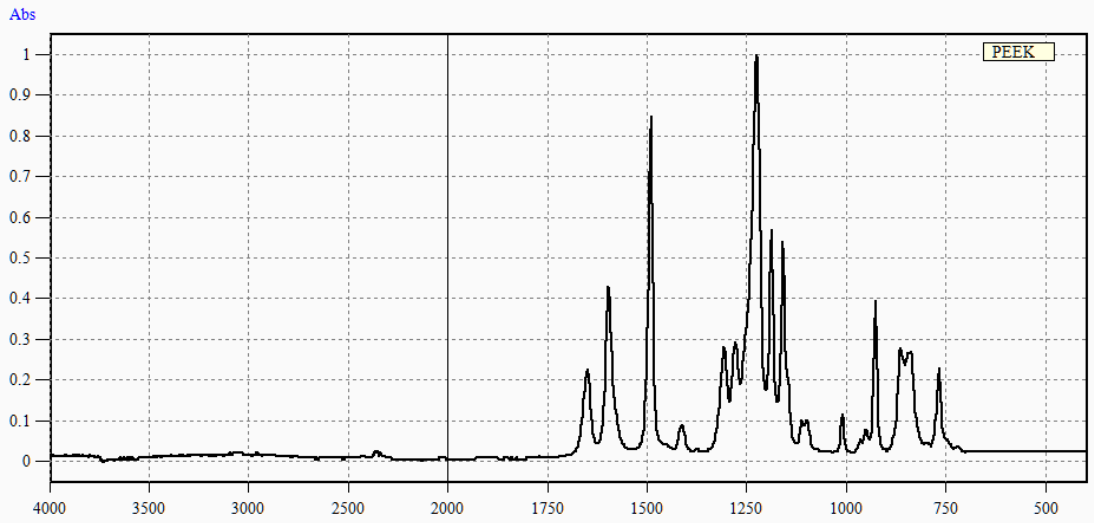

PEEKfilm

cm-1

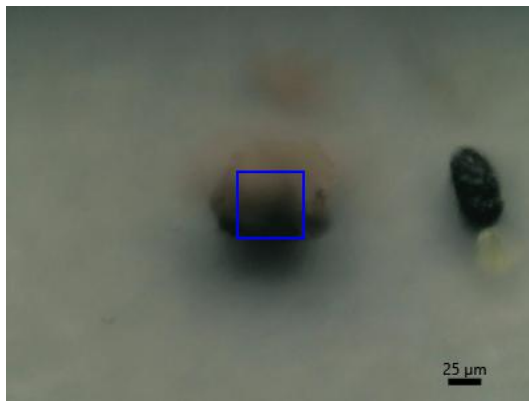

## Search Result Report

---

Filename : C:\Users\User\Desktop\UTSA samples\DR041120HG02\Point  
 Measurement\_fragment\_52.apit  
 Acquired Datetime : 2022/11/11 17:11:11

● **Search Parameters**

Library list :  
 IRs Polymer2  
 ATR-Polymer2  
 T-Polymer2  
 Maximum hits: 200  
 Minimum quality : 0  
 Algorithm : DiffDeriv

| Score | Library    | Name           | Comment                                    |
|-------|------------|----------------|--------------------------------------------|
| 589   | T-Polymer2 | Silicon Grease | Silicon Grease<br>Transmission(Microscope) |

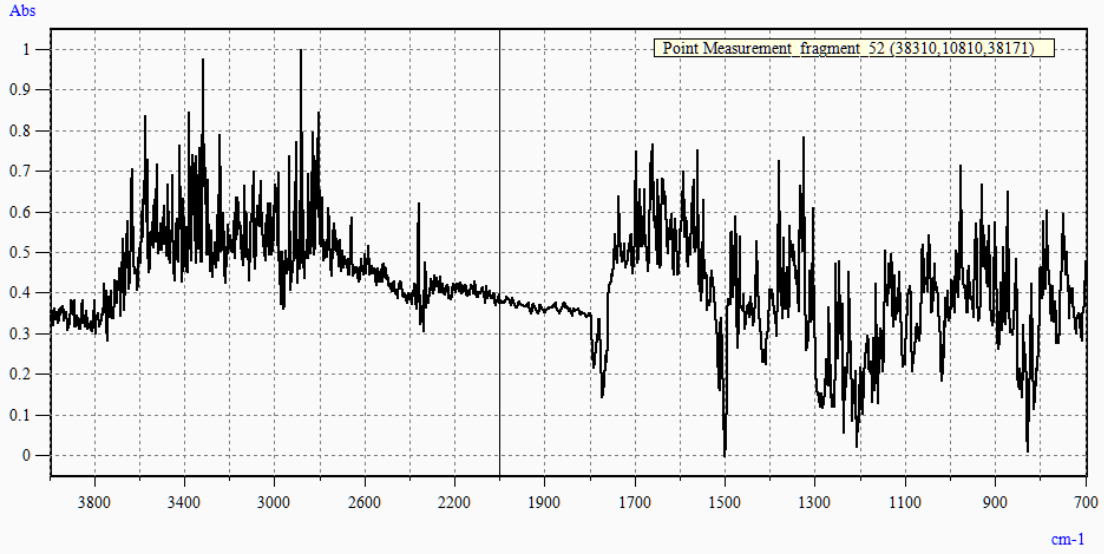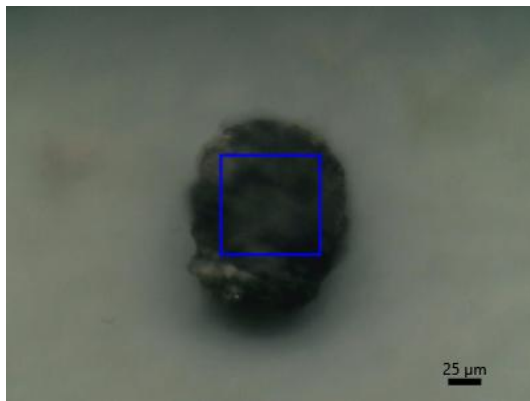

## Search Result Report

---

Filename : C:\Users\User\Desktop\UTSA samples\DR041120HG02\Point  
 Measurement\_fragment\_53.apit  
 Acquired Datetime : 2022/11/11 17:16:11

● **Search Parameters**

Library list :  
 IRs Polymer2  
 ATR-Polymer2  
 T-Polymer2  
 Maximum hits: 200  
 Minimum quality : 0  
 Algorithm : DiffDeriv

| Score | Library      | Name            | Comment                                     |
|-------|--------------|-----------------|---------------------------------------------|
| 586   | ATR-Polymer2 | D_Poly_1_Butene | Poly(1-Butene), Isotactic<br>DuraSamplIR-II |

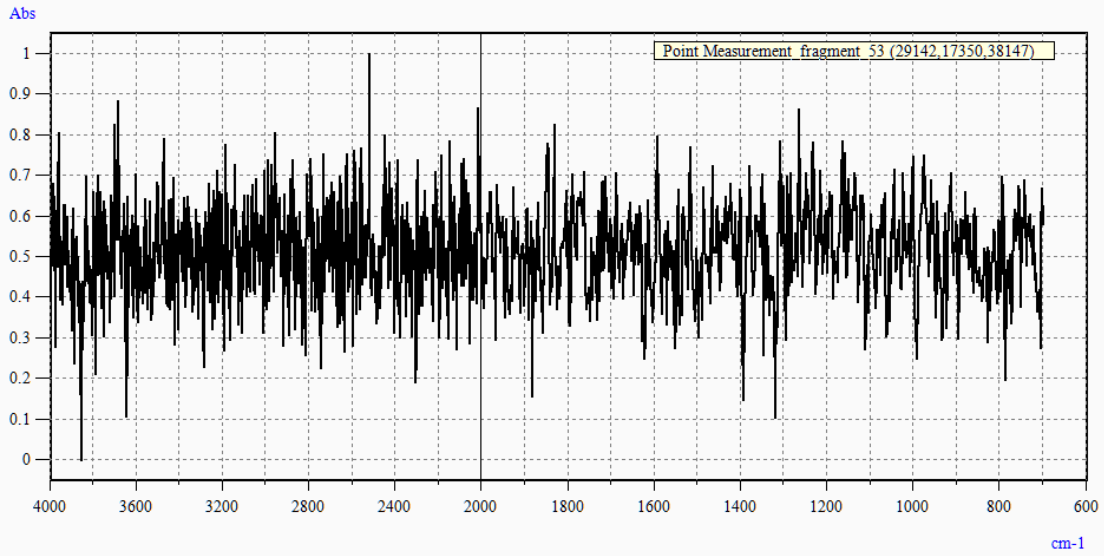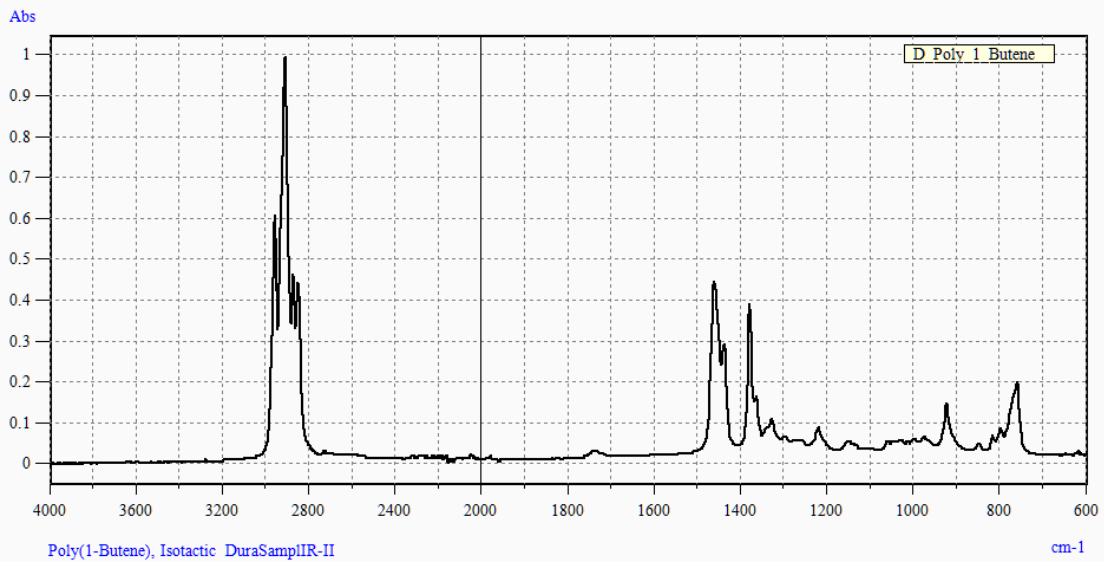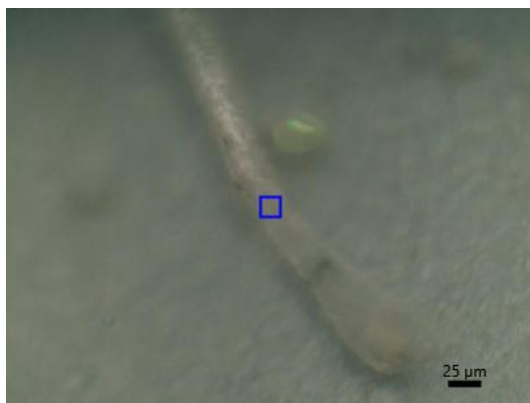

## Search Result Report

---

Filename : C:\Users\User\Desktop\UTSA samples\DR041120HG02\Point  
 Measurement\_fragment\_54.apit  
 Acquired Datetime : 2022/11/11 17:18:05

### ● Search Parameters

Library list :  
 IRs Polymer2  
 ATR-Polymer2  
 T-Polymer2  
 Maximum hits: 200  
 Minimum quality : 0  
 Algorithm : DiffDeriv

| Score | Library      | Name  | Comment                                |
|-------|--------------|-------|----------------------------------------|
| 590   | IRs Polymer2 | RAMIE | Ramie FiberATR/diamond<br>ATRcorrected |

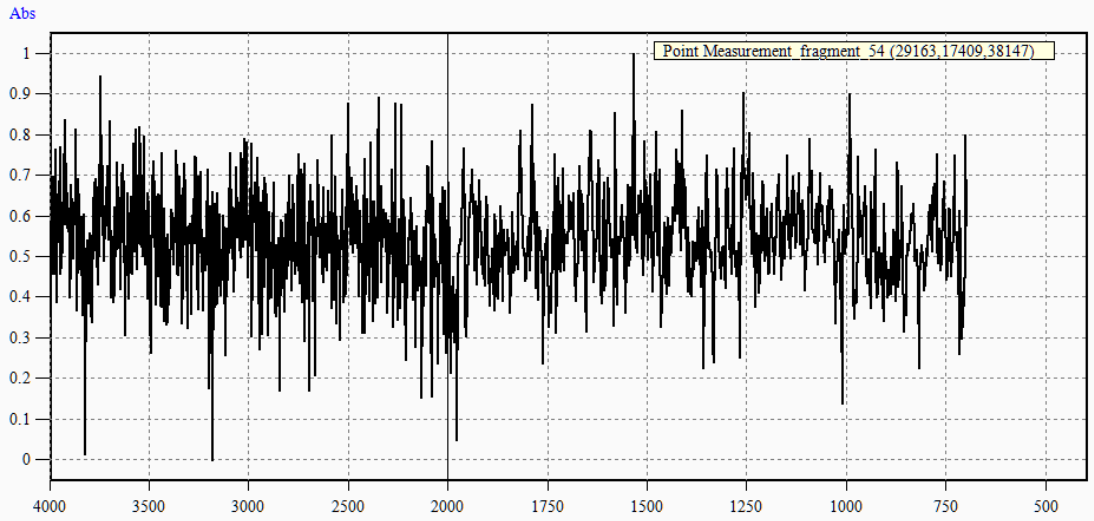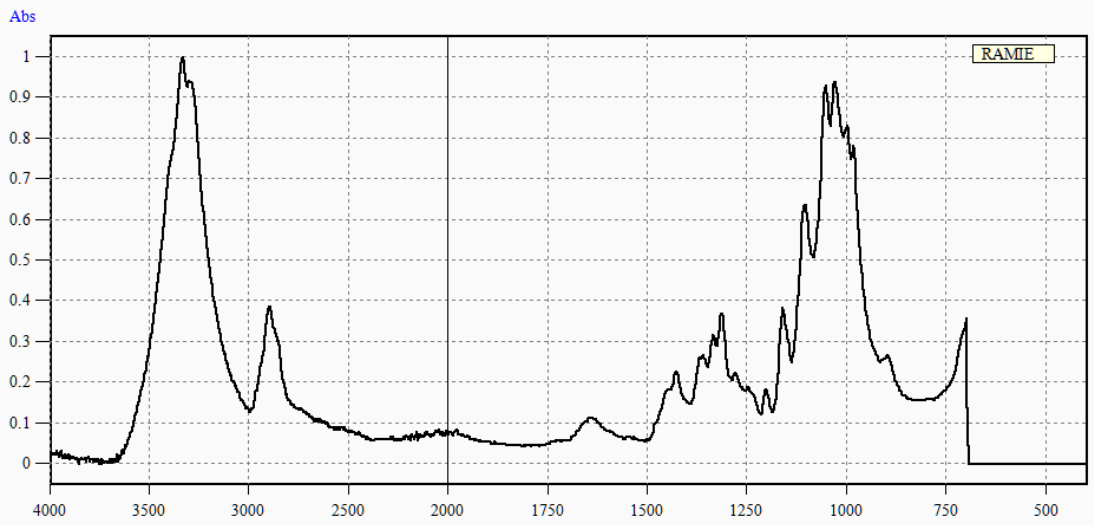

Ramie FiberATR/diamond ATRcorrected

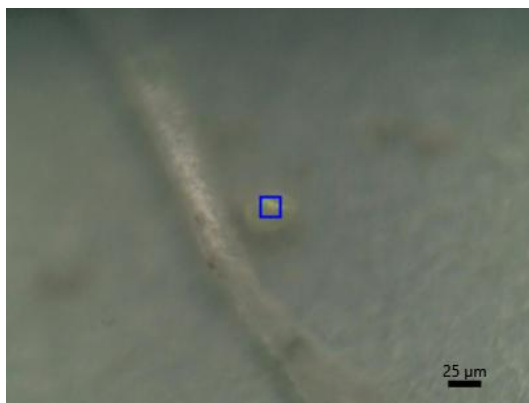

## Search Result Report

---

Filename : C:\Users\User\Desktop\UTSA samples\DR041120HG02\Point  
 Measurement\_fragment\_55.apit  
 Acquired Datetime : 2022/11/11 17:39:07

### ● Search Parameters

Library list :  
 IRs Polymer2  
 ATR-Polymer2  
 T-Polymer2  
 Maximum hits: 200  
 Minimum quality : 0  
 Algorithm : DiffDeriv

| Score | Library    | Name | Comment                                                |
|-------|------------|------|--------------------------------------------------------|
| 569   | T-Polymer2 | PEEK | Polyetheretherketone(PEEK)<br>Transmission(Microscope) |

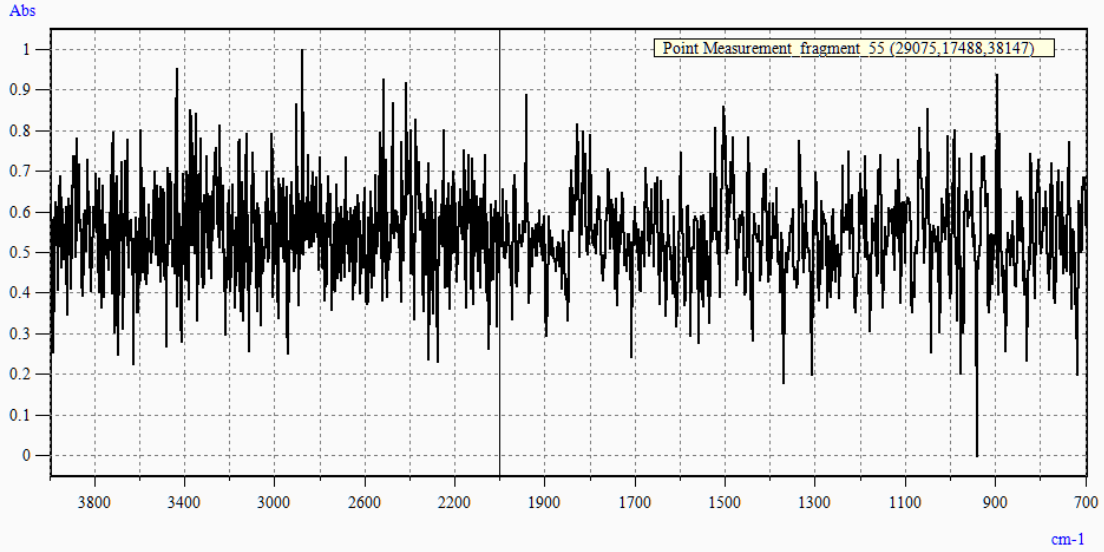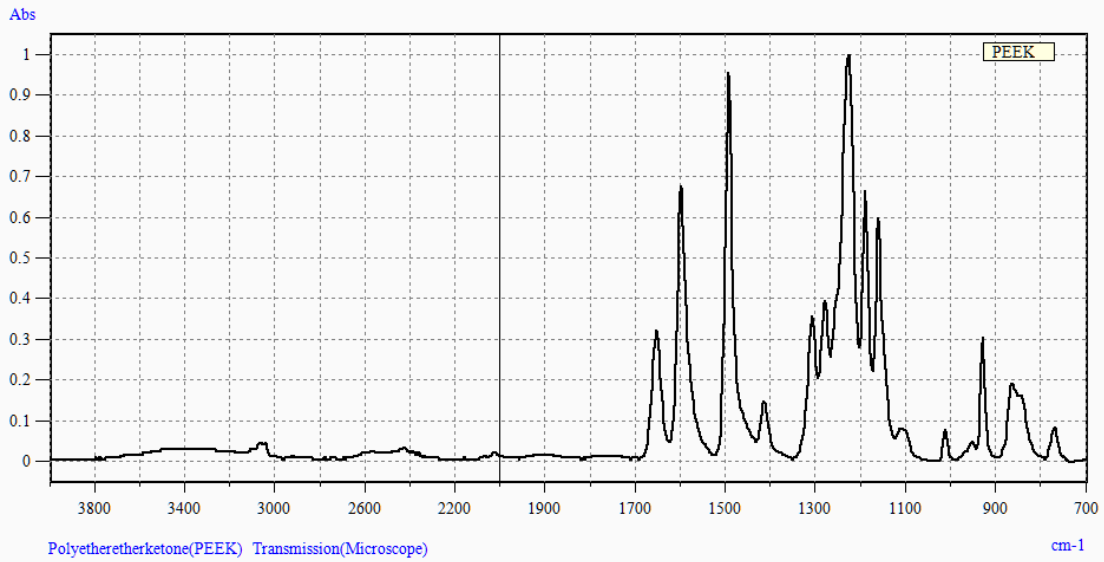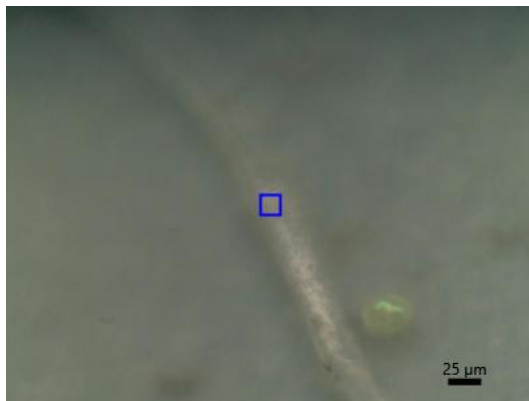

## Search Result Report

---

Filename : C:\Users\User\Desktop\UTSA samples\DR041120HG02\Point  
 Measurement\_fragment\_56.apit  
 Acquired Datetime : 2022/11/11 17:43:40

● **Search Parameters**

Library list :  
 IRs Polymer2  
 ATR-Polymer2  
 T-Polymer2  
 Maximum hits: 200  
 Minimum quality : 0  
 Algorithm : DiffDeriv

| Score | Library      | Name    | Comment                                                                                                           |
|-------|--------------|---------|-------------------------------------------------------------------------------------------------------------------|
| 600   | IRs Polymer2 | PETG-20 | POLYETHYLENE<br>GLYCOLORIGIN Date: 92/04/09<br>File: PETG-20.DXINFRARED<br>SPECTROPHOTOMETER FTIR-<br>8000 SERIES |

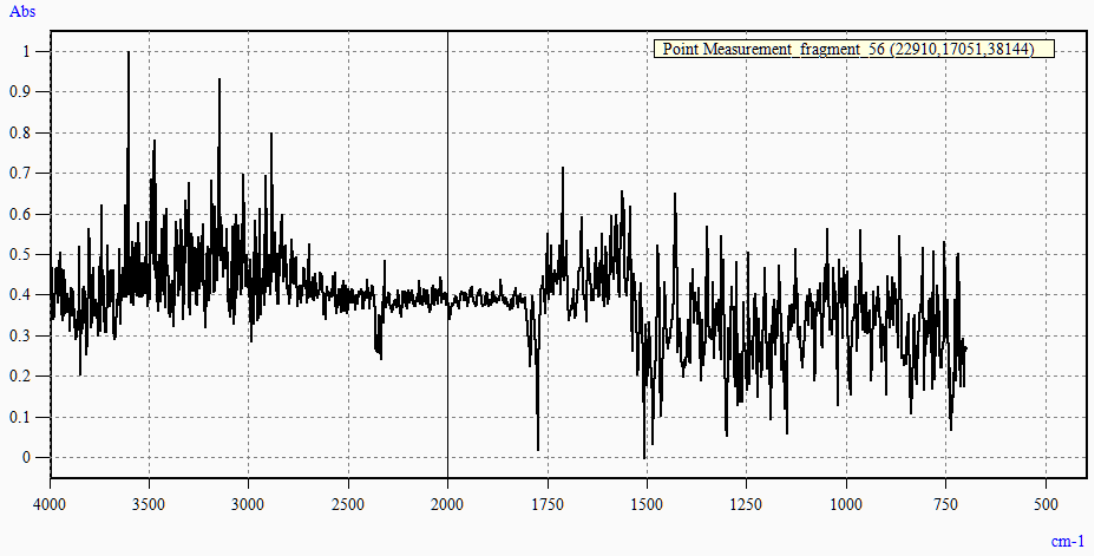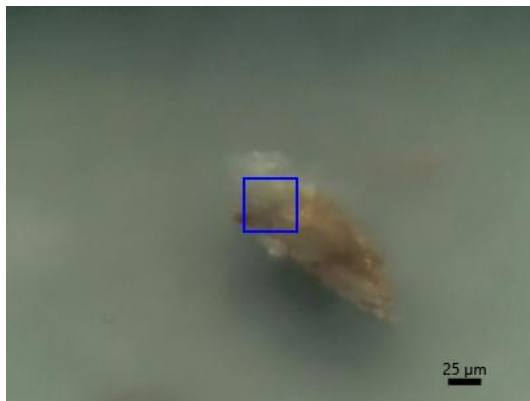

## Search Result Report

---

Filename : C:\Users\User\Desktop\UTSA samples\DR041120HG02\Point  
 Measurement\_fragment\_57.apit  
 Acquired Datetime : 2022/11/11 17:46:37

● **Search Parameters**

Library list :  
 IRs Polymer2  
 ATR-Polymer2  
 T-Polymer2  
 Maximum hits: 200  
 Minimum quality : 0  
 Algorithm : DiffDeriv

| Score | Library      | Name    | Comment                                    |
|-------|--------------|---------|--------------------------------------------|
| 605   | IRs Polymer2 | SILICO2 | Silicone rubberATR/diamond<br>ATRcorrected |

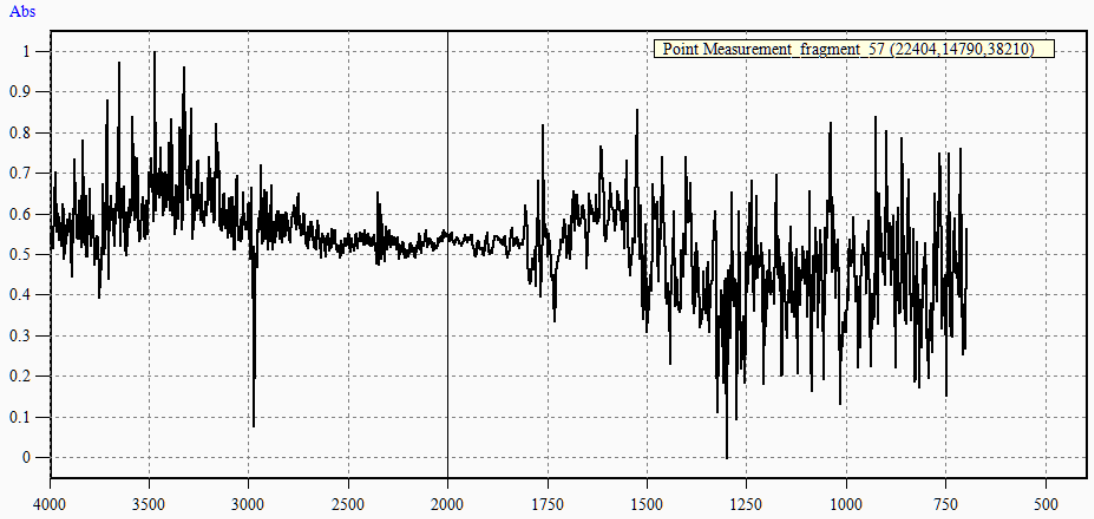

cm-1

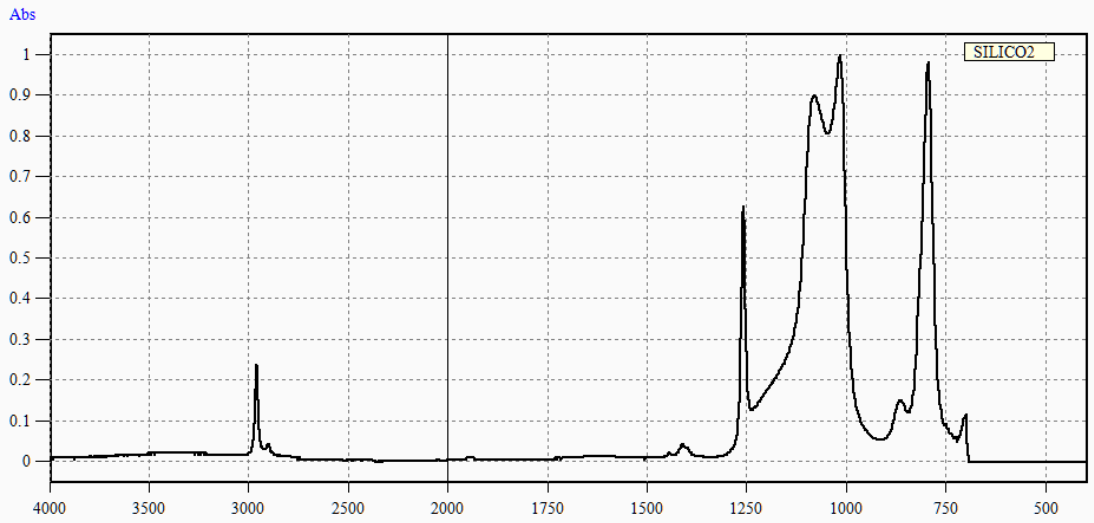

Silicone rubberATR/diamond ATRcorrected

cm-1

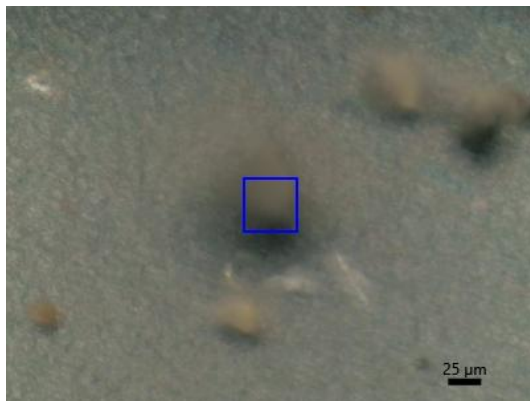

## Search Result Report

---

Filename : C:\Users\User\Desktop\UTSA samples\DR041120HG02\Point  
 Measurement\_fragment\_58.apit  
 Acquired Datetime : 2022/11/11 17:49:47

● **Search Parameters**

Library list :  
 IRs Polymer2  
 ATR-Polymer2  
 T-Polymer2  
 Maximum hits: 200  
 Minimum quality : 0  
 Algorithm : DiffDeriv

| Score | Library    | Name  | Comment                                       |
|-------|------------|-------|-----------------------------------------------|
| 649   | T-Polymer2 | T_PC2 | Polycarbonate(PC)<br>Transmission(Microscope) |

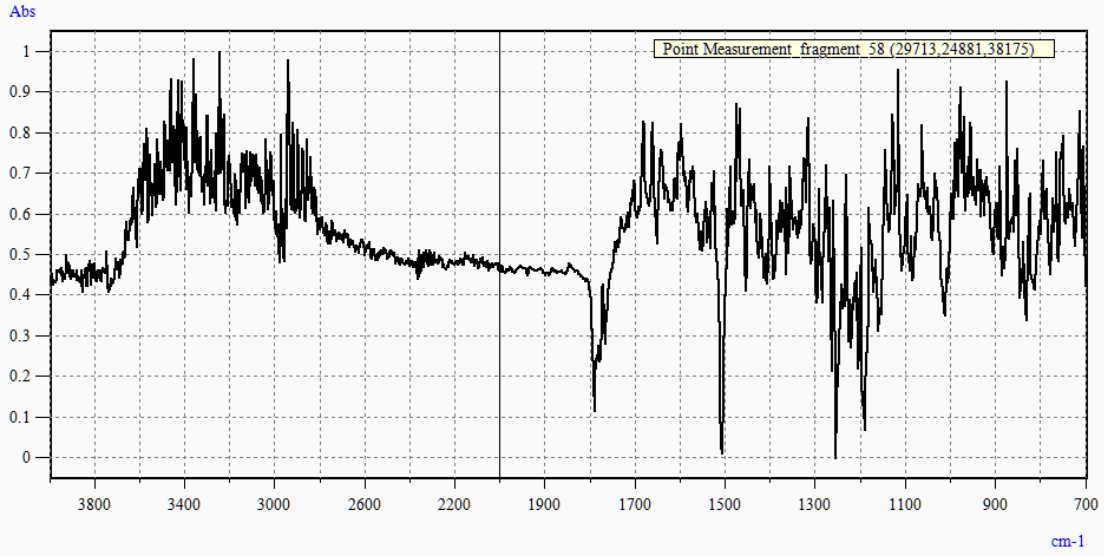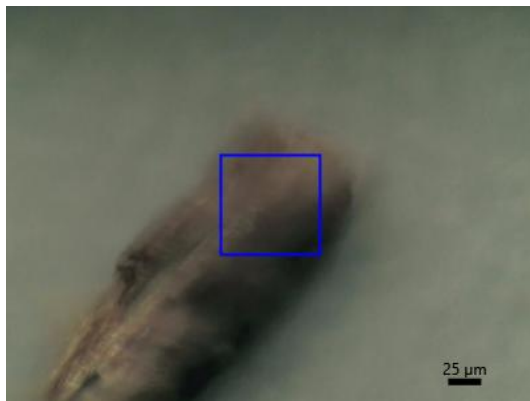

## Search Result Report

---

Filename : C:\Users\User\Desktop\UTSA samples\DR041120HG02\Point  
 Measurement\_fragment\_59.apit  
 Acquired Datetime : 2022/11/11 17:51:56

### ● Search Parameters

Library list :  
 IRs Polymer2  
 ATR-Polymer2  
 T-Polymer2  
 Maximum hits: 200  
 Minimum quality : 0  
 Algorithm : DiffDeriv

| Score | Library    | Name  | Comment                                       |
|-------|------------|-------|-----------------------------------------------|
| 619   | T-Polymer2 | T_PC2 | Polycarbonate(PC)<br>Transmission(Microscope) |

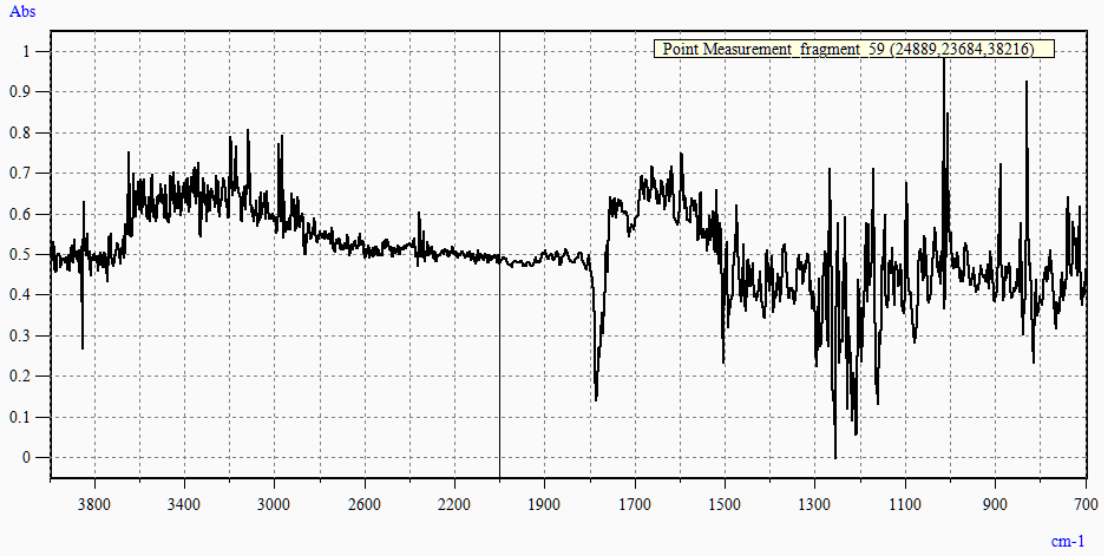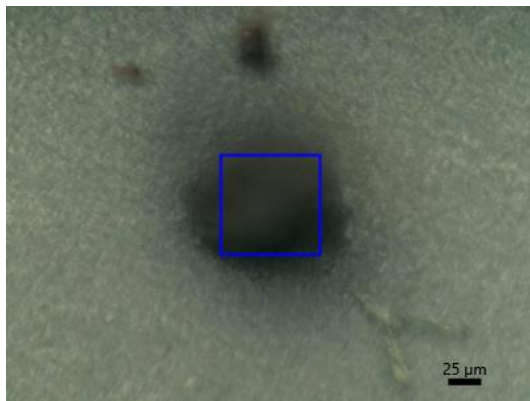

## Search Result Report

---

Filename : C:\Users\User\Desktop\UTSA samples\DR041120HG06\Point  
 Measurement\_fiber\_5.apit  
 Acquired Datetime : 2022/11/11 11:42:09

● **Search Parameters**

Library list :  
 IRs Polymer2  
 ATR-Polymer2  
 T-Polymer2  
 Maximum hits: 200  
 Minimum quality : 0  
 Algorithm : DiffDeriv

| Score | Library      | Name     | Comment                                           |
|-------|--------------|----------|---------------------------------------------------|
| 580   | ATR-Polymer2 | D_IR-cis | cis-Polyisoprene Rubber(IR-cis)<br>DuraSamplIR-II |

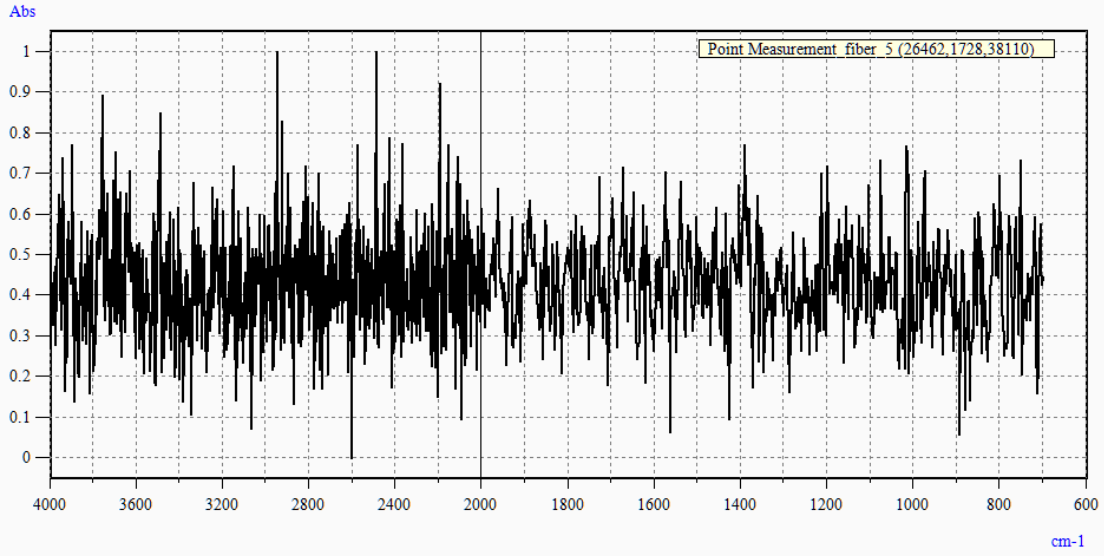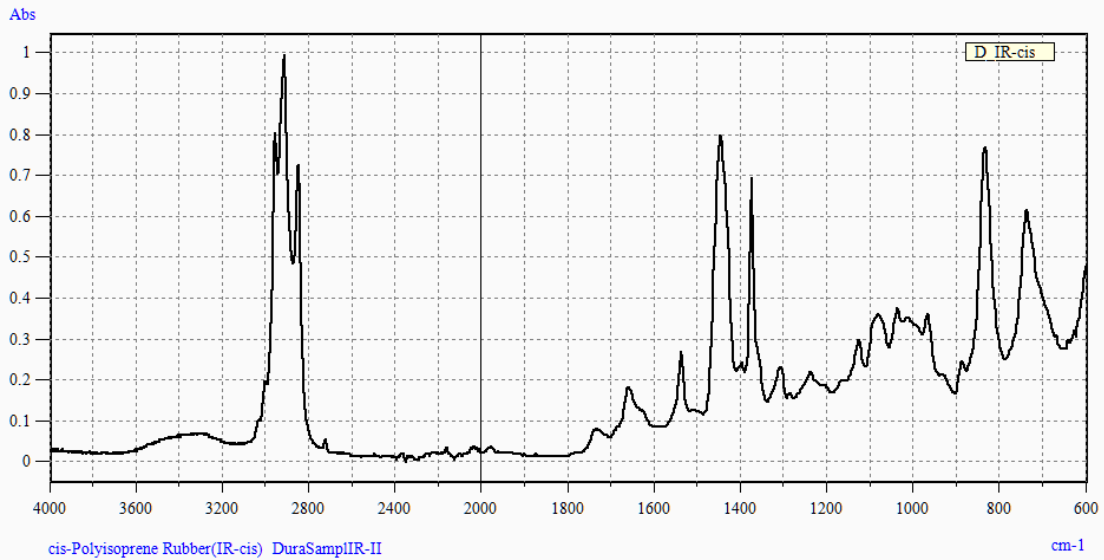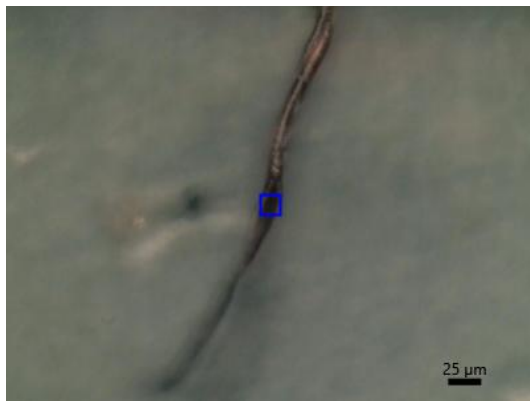

## Search Result Report

---

Filename : C:\Users\User\Desktop\UTSA samples\DR041120HG06\Point  
 Measurement\_fiber\_6.apit  
 Acquired Datetime : 2022/11/11 11:57:46

● **Search Parameters**

Library list :  
 IRs Polymer2  
 ATR-Polymer2  
 T-Polymer2  
 Maximum hits: 200  
 Minimum quality : 0  
 Algorithm : DiffDeriv

| Score | Library      | Name     | Comment                                                                       |
|-------|--------------|----------|-------------------------------------------------------------------------------|
| 586   | IRs Polymer2 | BUTYL_RB | Butyl rubber with<br>salt(salt:1540,1016,876cm-<br>1)ATR/diamond ATRcorrected |

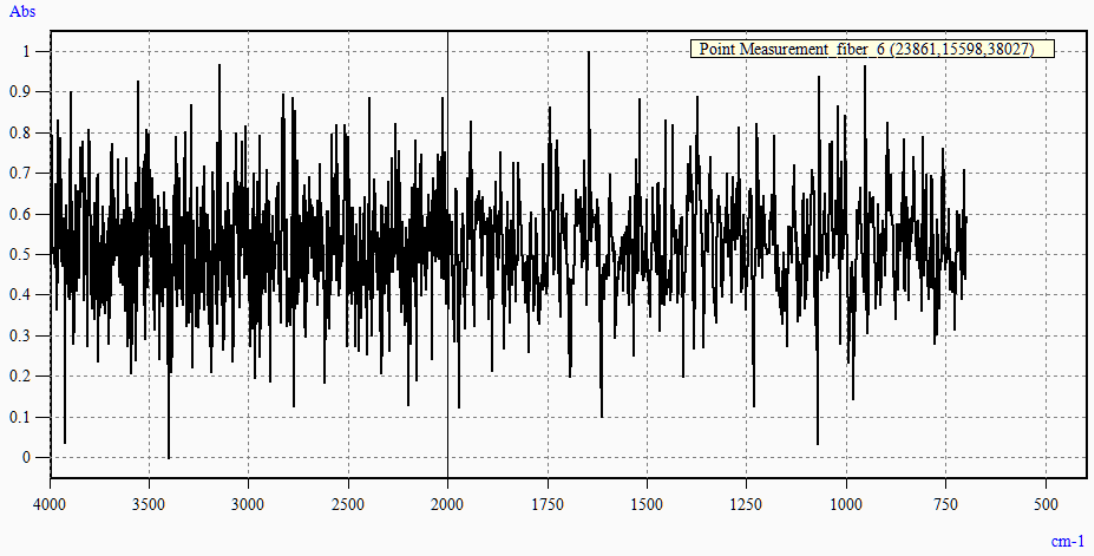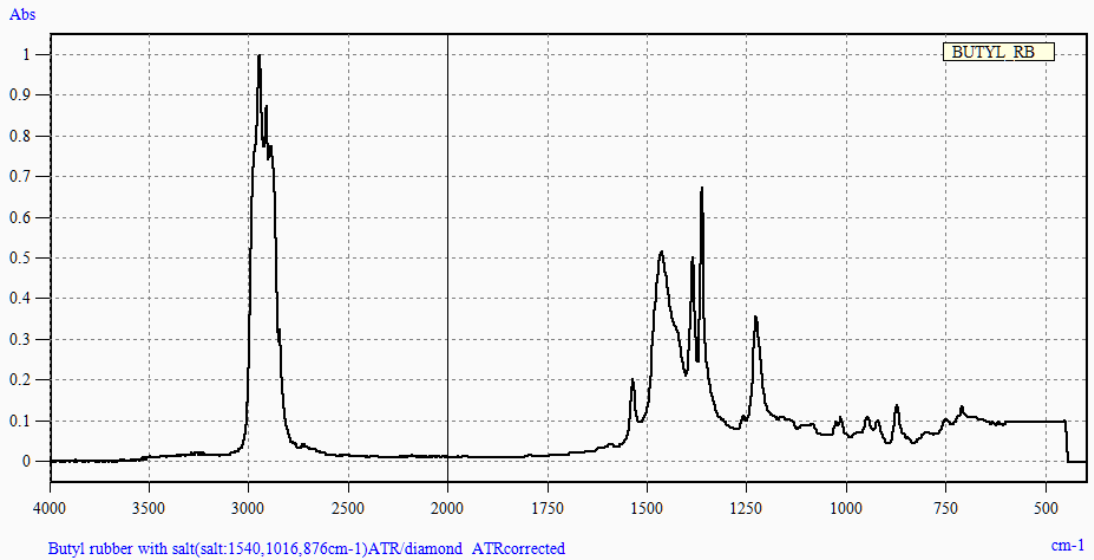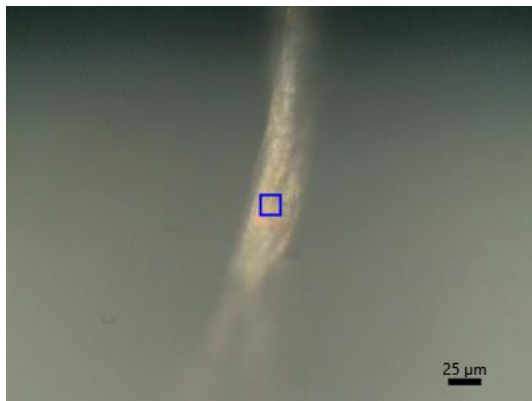

## Search Result Report

---

Filename : C:\Users\User\Desktop\UTSA samples\DR041120HG06\Point  
 Measurement\_fiber\_7.apit  
 Acquired Datetime : 2022/11/11 12:11:56

● **Search Parameters**

Library list :  
 IRs Polymer2  
 ATR-Polymer2  
 T-Polymer2  
 Maximum hits: 200  
 Minimum quality : 0  
 Algorithm : DiffDeriv

| Score | Library      | Name  | Comment                                       |
|-------|--------------|-------|-----------------------------------------------|
| 584   | ATR-Polymer2 | D_PI3 | Polyimide(Electronic Parts)<br>DuraSamplIR-II |

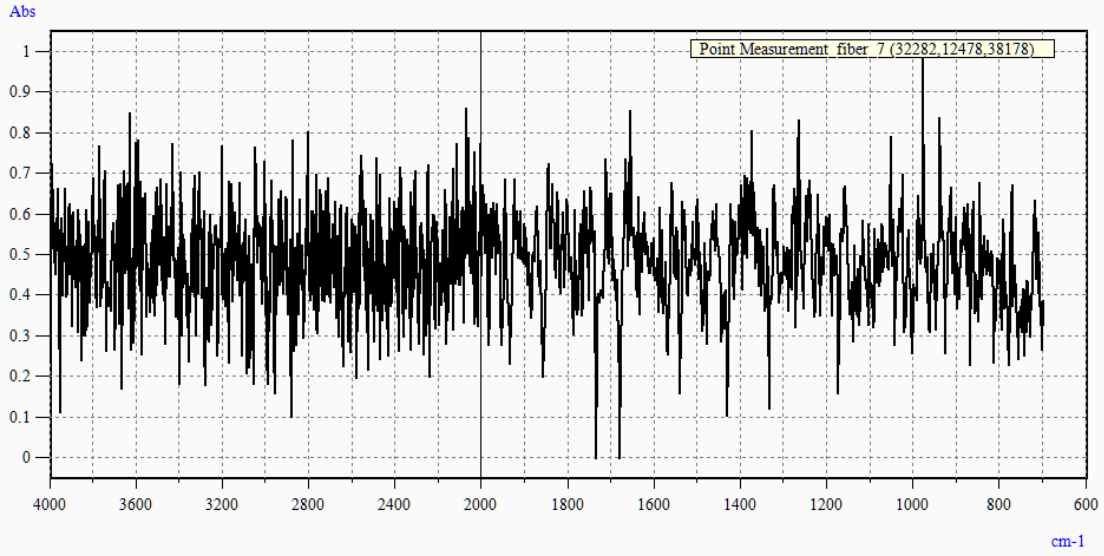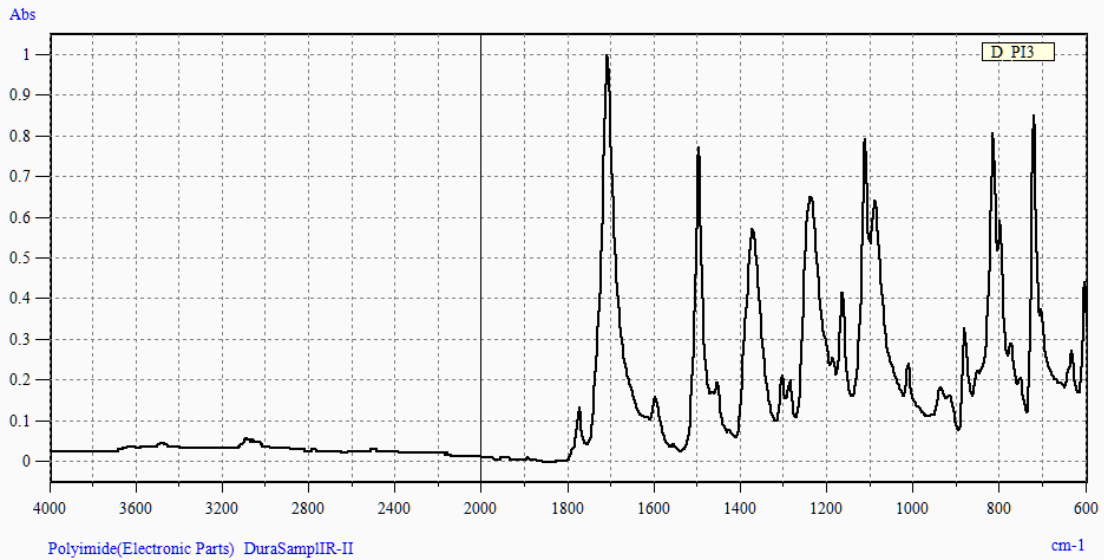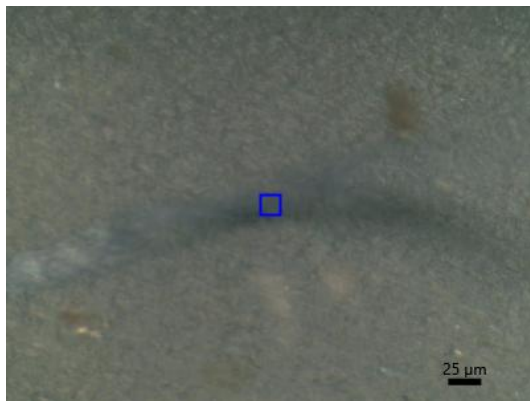

## Search Result Report

---

Filename : C:\Users\User\Desktop\UTSA samples\DR041120HG06\Point

Measurement\_fiber\_8.apit

Acquired Datetime : 2022/11/11 12:19:16

● **Search Parameters**

Library list :

IRs Polymer2

ATR-Polymer2

T-Polymer2

Maximum hits: 200

Minimum quality : 0

Algorithm : DiffDeriv

| Score | Library    | Name | Comment                                       |
|-------|------------|------|-----------------------------------------------|
| 696   | T-Polymer2 | PC   | Polycarbonate(PC)<br>Transmission(Microscope) |

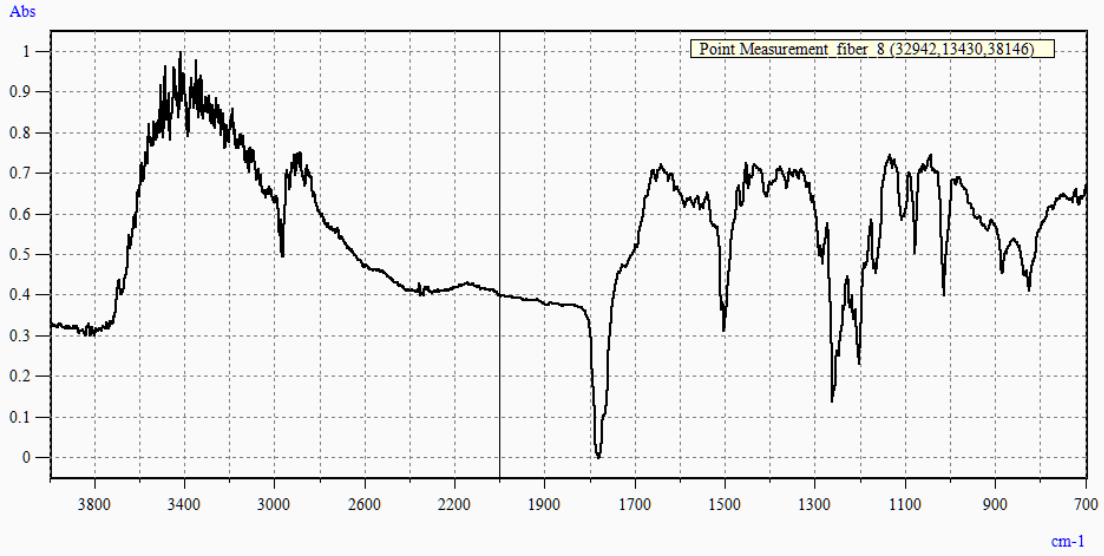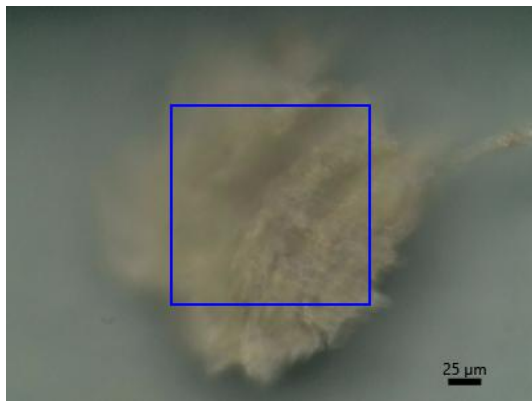

## Search Result Report

---

Filename : C:\Users\User\Desktop\UTSA samples\DR041120HG06\Point

Measurement\_fiber\_9.apit

Acquired Datetime : 2022/11/11 12:22:20

● **Search Parameters**

Library list :

IRs Polymer2

ATR-Polymer2

T-Polymer2

Maximum hits: 200

Minimum quality : 0

Algorithm : DiffDeriv

| Score | Library    | Name | Comment                                       |
|-------|------------|------|-----------------------------------------------|
| 590   | T-Polymer2 | PC   | Polycarbonate(PC)<br>Transmission(Microscope) |

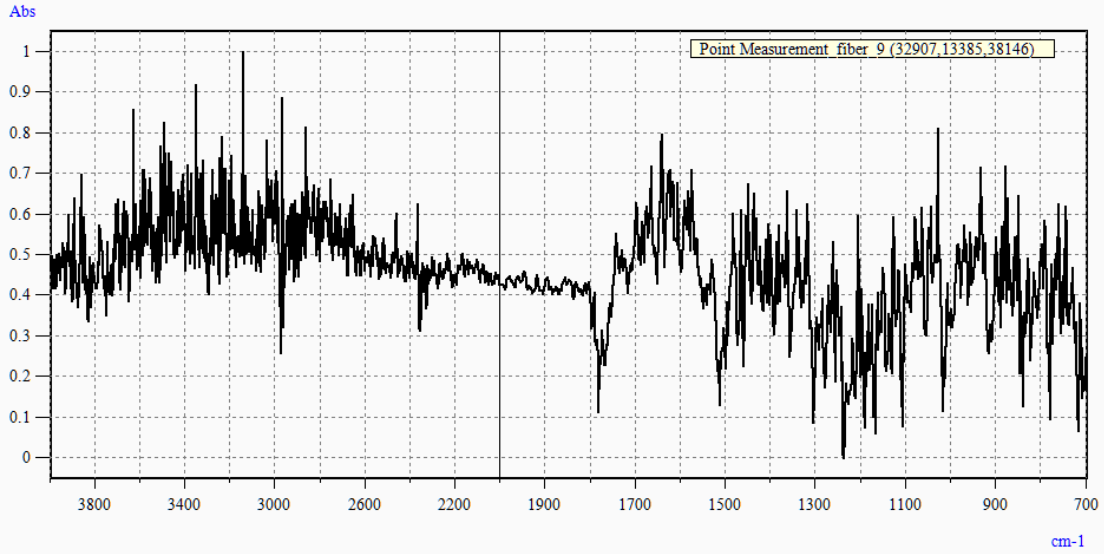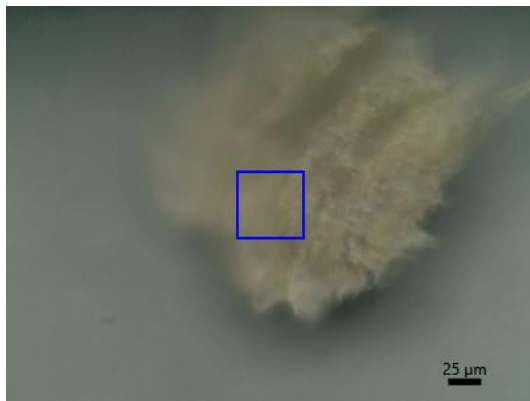

## Search Result Report

---

Filename : C:\Users\User\Desktop\UTSA samples\DR041120HG06\Point  
 Measurement\_fiber\_10.apit  
 Acquired Datetime : 2022/11/11 12:26:16

### ● Search Parameters

Library list :  
 IRs Polymer2  
 ATR-Polymer2  
 T-Polymer2  
 Maximum hits: 200  
 Minimum quality : 0  
 Algorithm : DiffDeriv

| Score | Library      | Name | Comment                             |
|-------|--------------|------|-------------------------------------|
| 644   | ATR-Polymer2 | D_PC | Polycarbonate(PC)<br>DuraSamplIR-II |

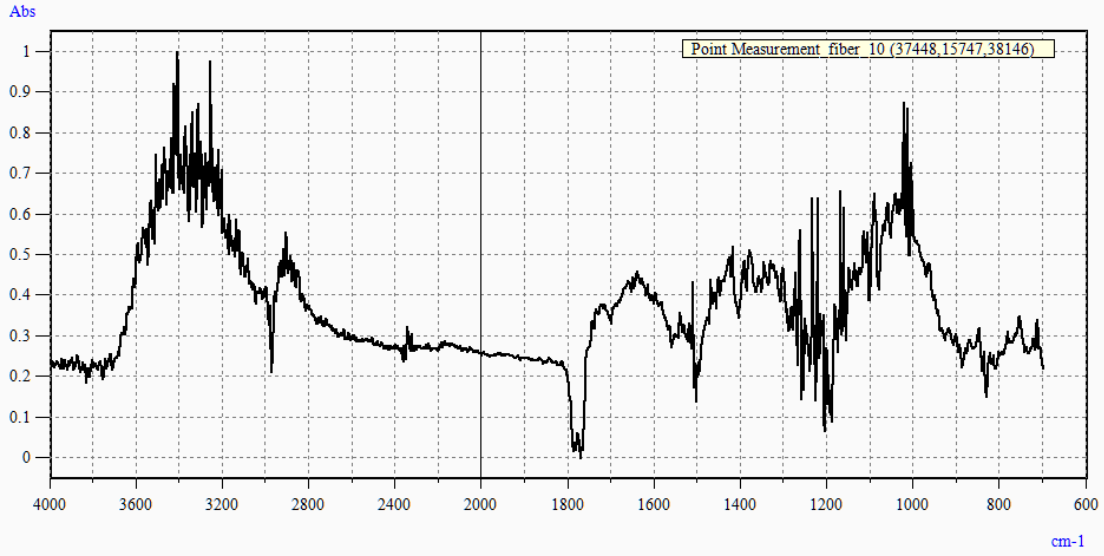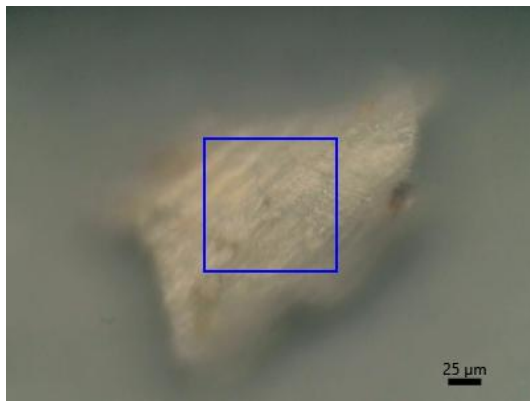

## Search Result Report

---

Filename : C:\Users\User\Desktop\UTSA samples\DR041120HG06\Point  
 Measurement\_fiber\_11.apit  
 Acquired Datetime : 2022/11/11 12:28:11

● **Search Parameters**

Library list :  
 IRs Polymer2  
 ATR-Polymer2  
 T-Polymer2  
 Maximum hits: 200  
 Minimum quality : 0  
 Algorithm : DiffDeriv

| Score | Library      | Name         | Comment                              |
|-------|--------------|--------------|--------------------------------------|
| 582   | ATR-Polymer2 | D_Polyamide6 | Polyamide(Nylon12)<br>DuraSamplIR-II |

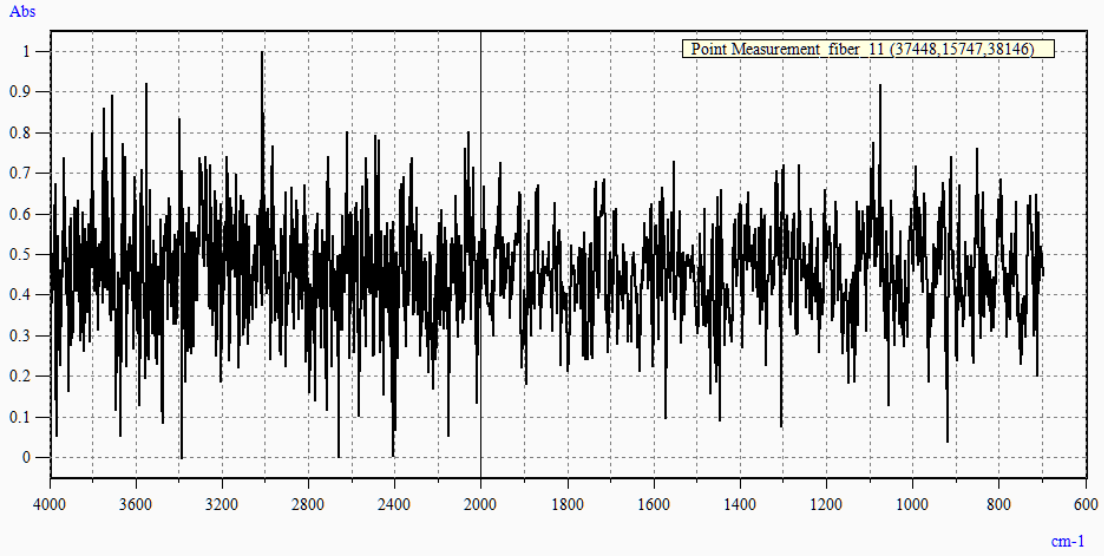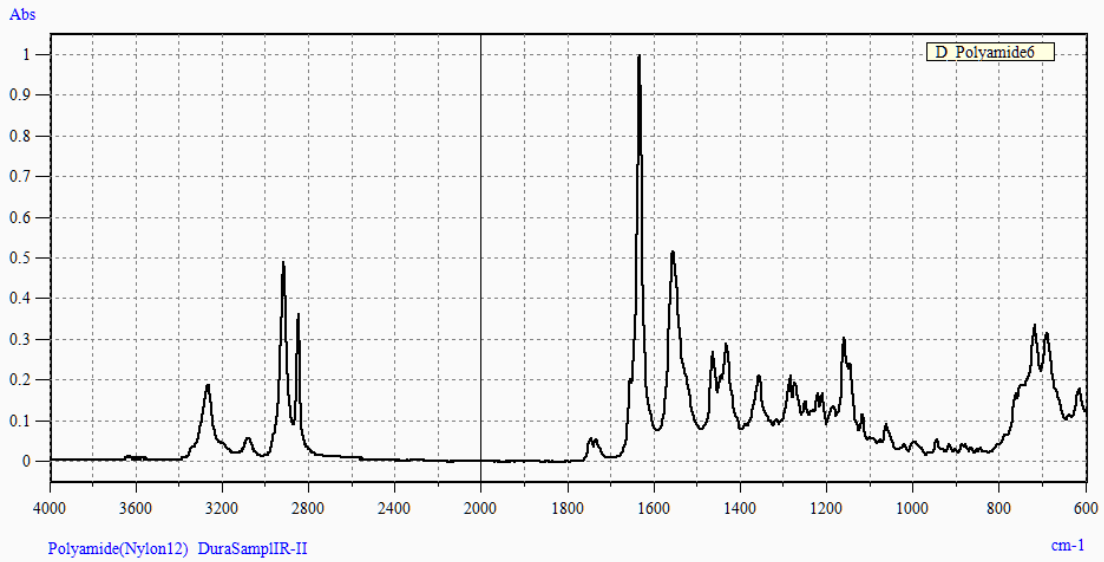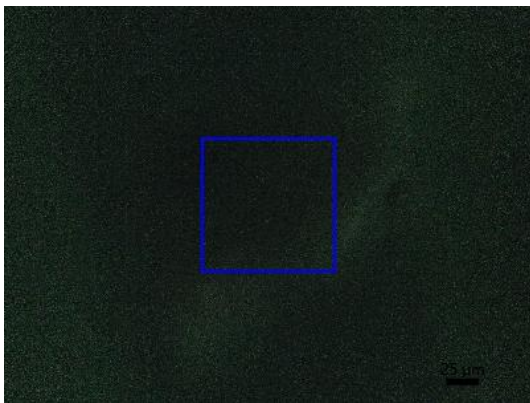

## Search Result Report

---

Filename : C:\Users\User\Desktop\UTSA samples\DR041120HG06\Point  
 Measurement\_fiber\_12.apit  
 Acquired Datetime : 2022/11/11 12:29:11

● **Search Parameters**

Library list :  
 IRs Polymer2  
 ATR-Polymer2  
 T-Polymer2  
 Maximum hits: 200  
 Minimum quality : 0  
 Algorithm : DiffDeriv

| Score | Library    | Name          | Comment                                   |
|-------|------------|---------------|-------------------------------------------|
| 607   | T-Polymer2 | Polyacetylene | Polyacetylene<br>Transmission(Microscope) |

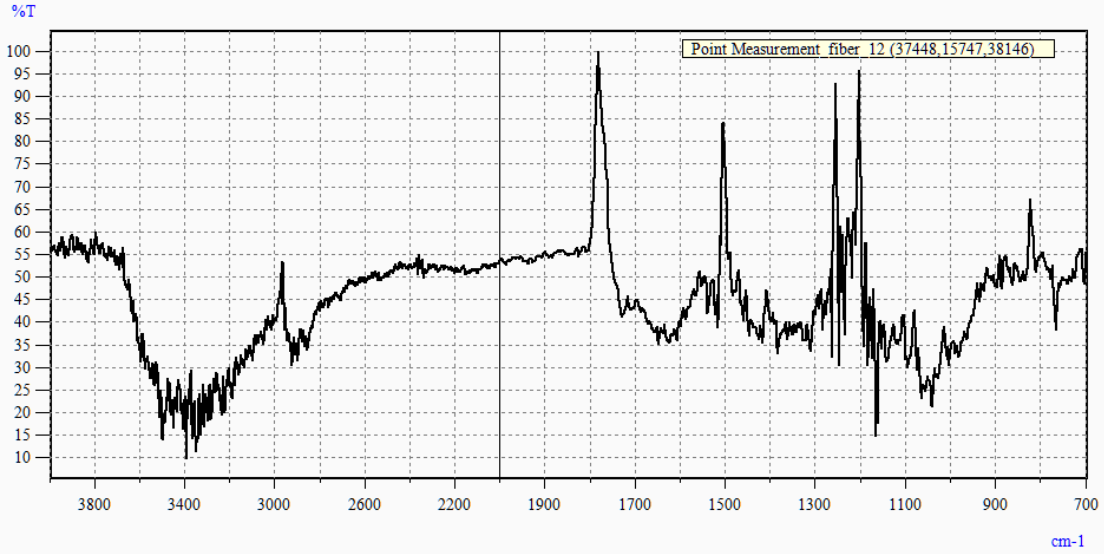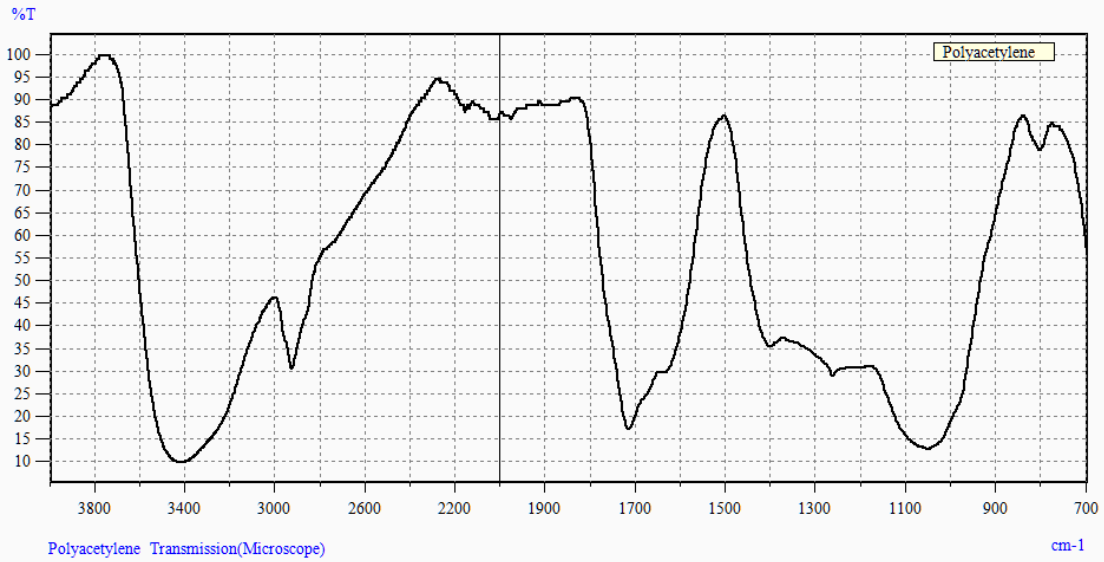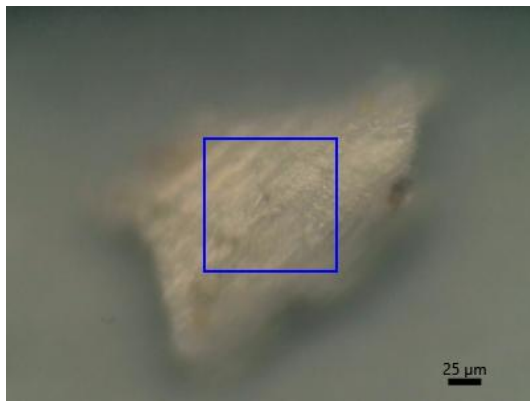

## Search Result Report

---

Filename : C:\Users\User\Desktop\UTSA samples\DR041120HG06\Point

Measurement\_fiber\_20.apit

Acquired Datetime : 2022/11/11 13:21:22

● **Search Parameters**

Library list :

IRs Polymer2

ATR-Polymer2

T-Polymer2

Maximum hits: 200

Minimum quality : 0

Algorithm : DiffDeriv

| Score | Library      | Name  | Comment                                 |
|-------|--------------|-------|-----------------------------------------|
| 596   | ATR-Polymer2 | D_PES | Polyethersulfone(PES)<br>DuraSamplIR-II |

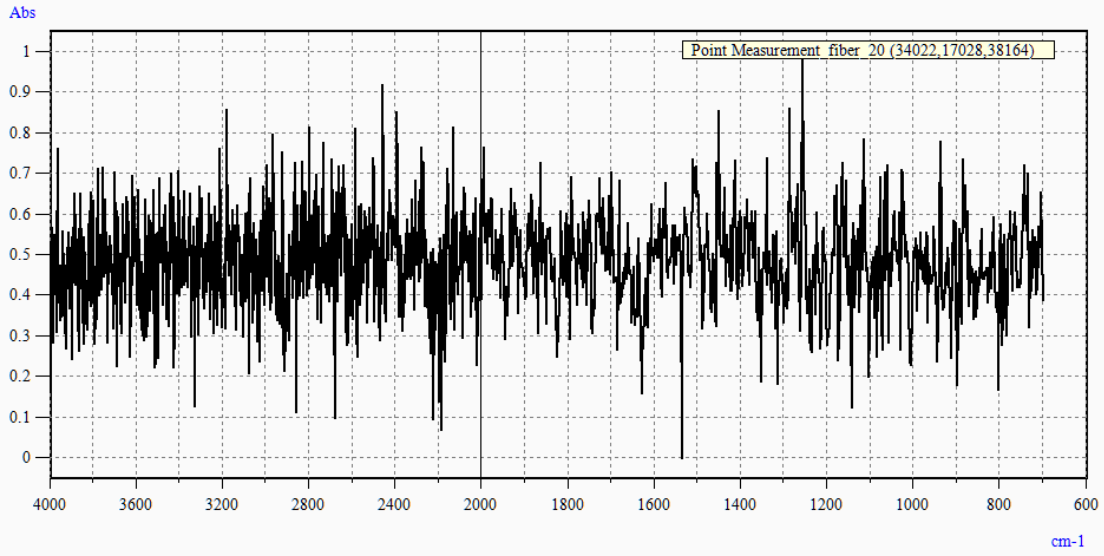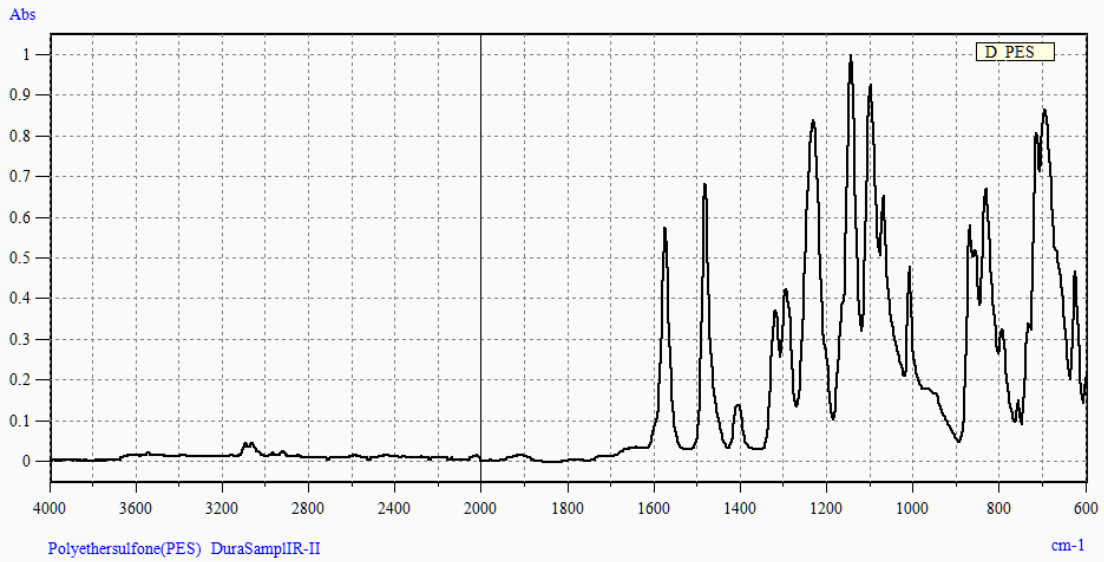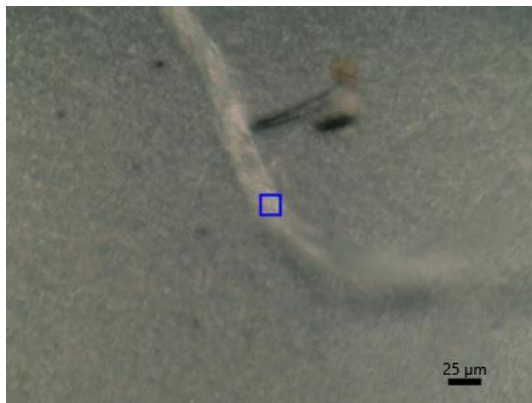

## Search Result Report

---

Filename : C:\Users\User\Desktop\UTSA samples\DR041120HG06\Point  
 Measurement\_fiber\_21.apit  
 Acquired Datetime : 2022/11/11 13:27:40

● **Search Parameters**

Library list :  
 IRs Polymer2  
 ATR-Polymer2  
 T-Polymer2  
 Maximum hits: 200  
 Minimum quality : 0  
 Algorithm : DiffDeriv

| Score | Library      | Name   | Comment                                         |
|-------|--------------|--------|-------------------------------------------------|
| 585   | ATR-Polymer2 | D_PVDF | Polyvinylidene Fluoride(PVDF)<br>DuraSamplIR-II |

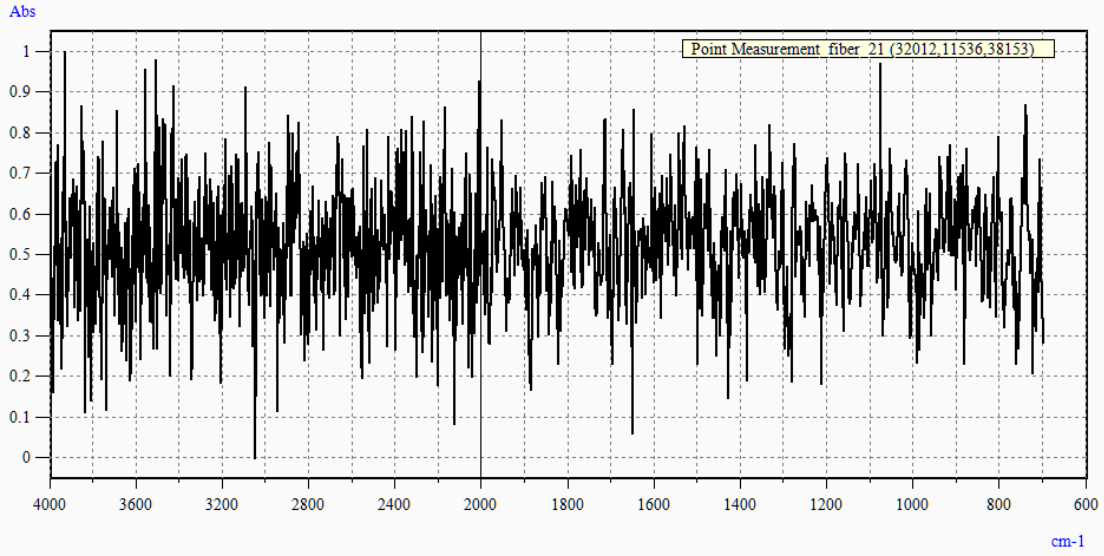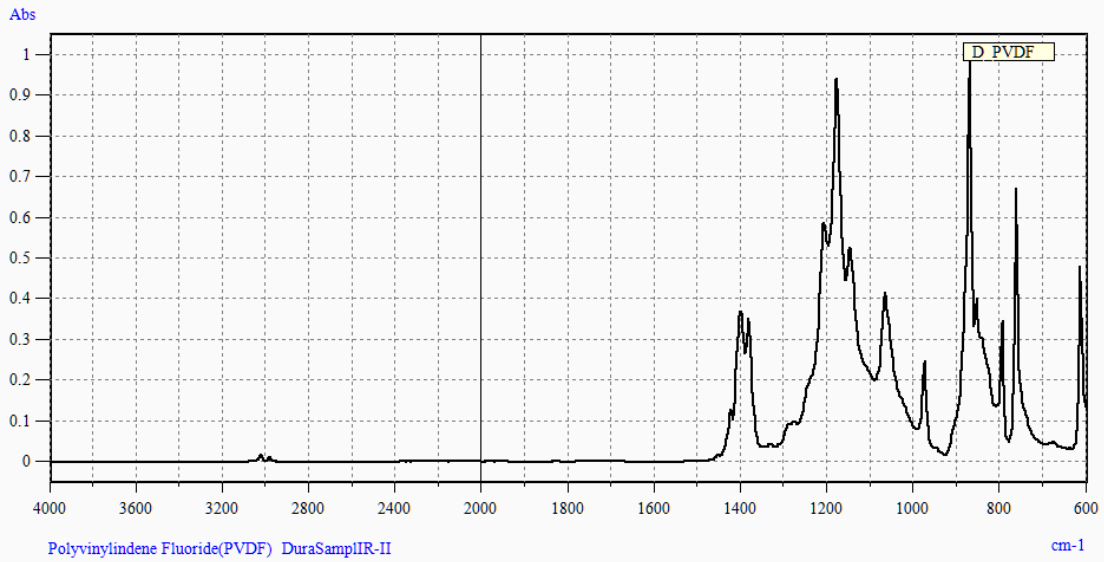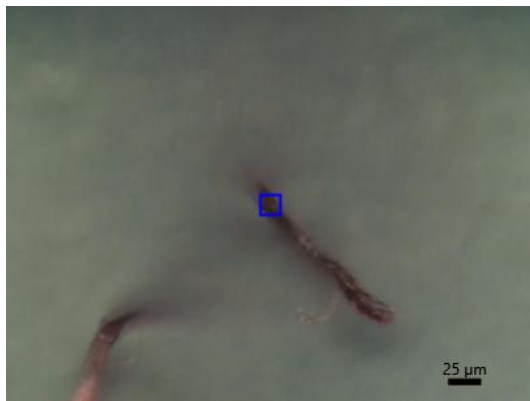

## Search Result Report

---

Filename : C:\Users\User\Desktop\UTSA samples\DR041120HG06\Point  
 Measurement\_fragment\_1.apit  
 Acquired Datetime : 2022/11/11 12:42:16

● **Search Parameters**

Library list :  
 IRs Polymer2  
 ATR-Polymer2  
 T-Polymer2  
 Maximum hits: 200  
 Minimum quality : 0  
 Algorithm : DiffDeriv

| Score | Library    | Name           | Comment                                   |
|-------|------------|----------------|-------------------------------------------|
| 580   | T-Polymer2 | T_PhenoxyResin | Phenoxy Resin<br>Transmission(Microscope) |

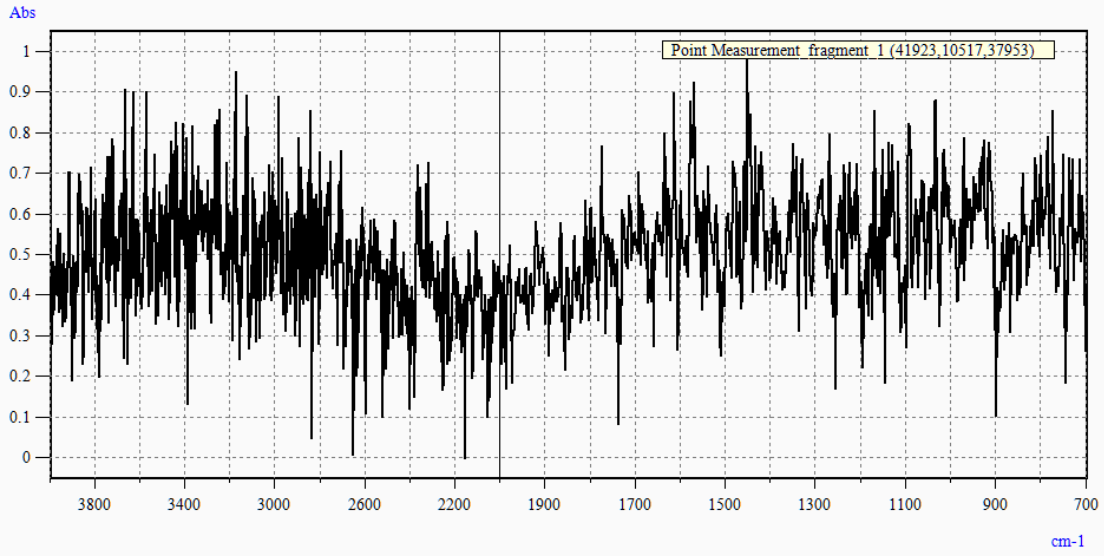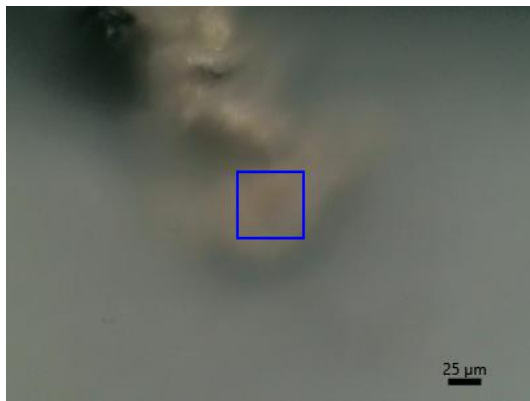

## Search Result Report

---

Filename : C:\Users\User\Desktop\UTSA samples\DR041120HG06\Point  
 Measurement\_fragment\_20.apit  
 Acquired Datetime : 2022/11/11 12:52:35

● **Search Parameters**

Library list :  
 IRs Polymer2  
 ATR-Polymer2  
 T-Polymer2  
 Maximum hits: 200  
 Minimum quality : 0  
 Algorithm : DiffDeriv

| Score | Library    | Name                      | Comment                                               |
|-------|------------|---------------------------|-------------------------------------------------------|
| 582   | T-Polymer2 | Styrene-Ethylene-Butylene | Styrene-Ethylene-Butylene<br>Transmission(Microscope) |

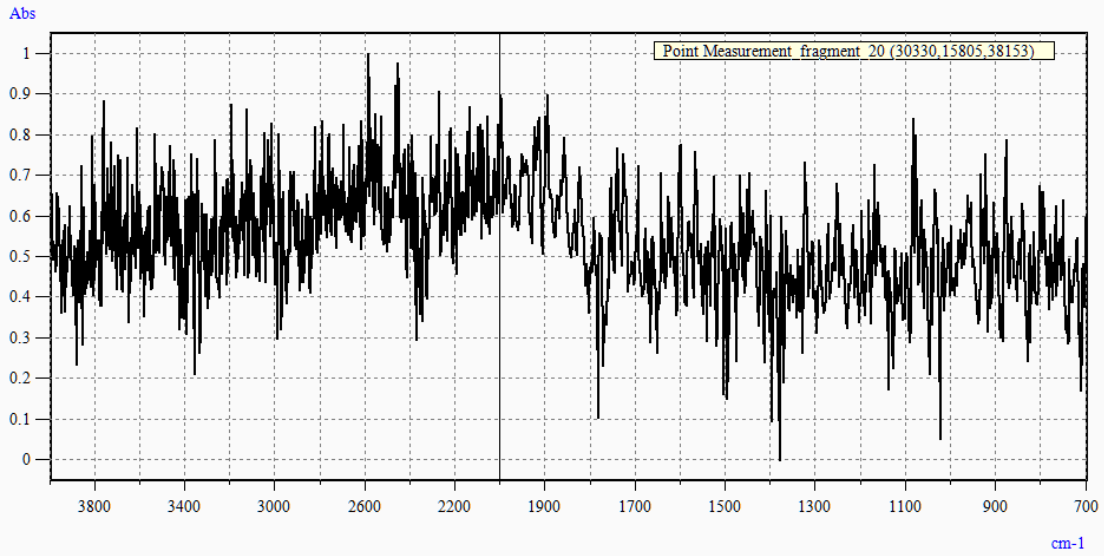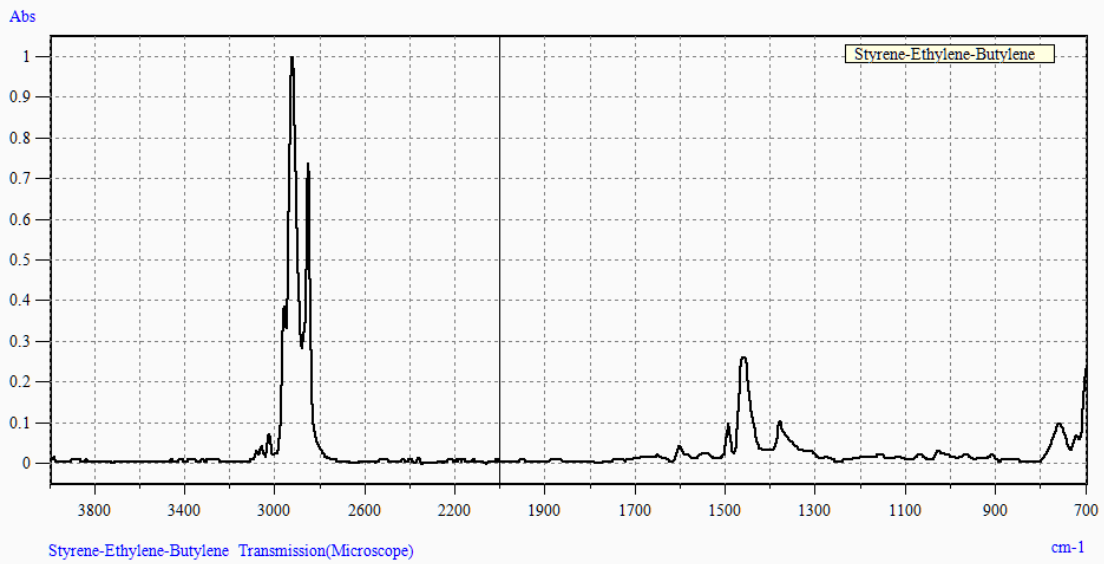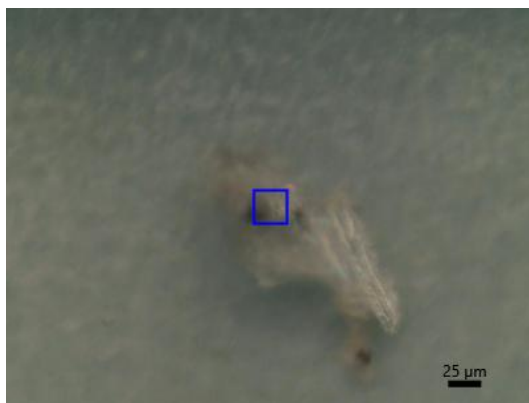

## Search Result Report

---

Filename : C:\Users\User\Desktop\UTSA samples\DR041120HG06\Point  
 Measurement\_fragment\_21.apit  
 Acquired Datetime : 2022/11/11 13:02:54

● **Search Parameters**

Library list :  
 IRs Polymer2  
 ATR-Polymer2  
 T-Polymer2  
 Maximum hits: 200  
 Minimum quality : 0  
 Algorithm : DiffDeriv

| Score | Library      | Name | Comment                             |
|-------|--------------|------|-------------------------------------|
| 603   | ATR-Polymer2 | D_PC | Polycarbonate(PC)<br>DuraSamplIR-II |

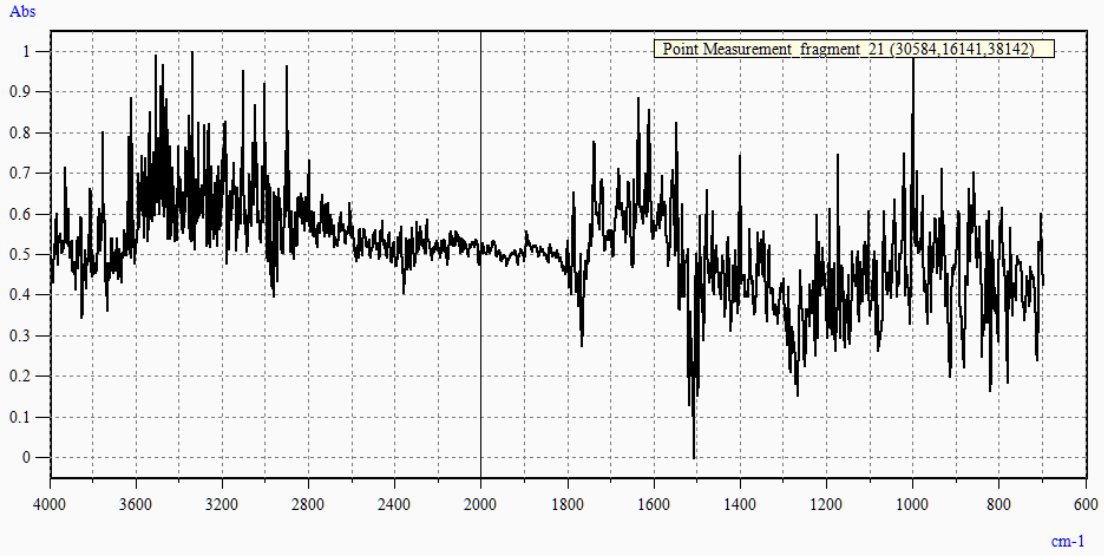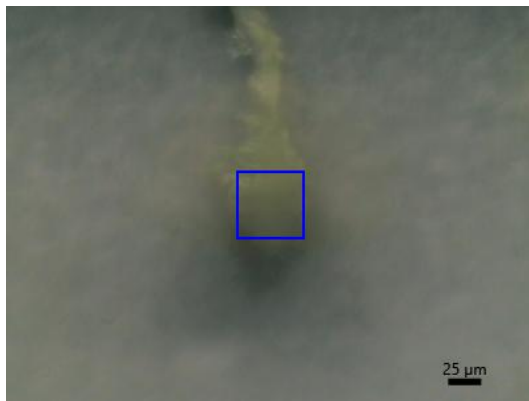

## Search Result Report

---

Filename : C:\Users\User\Desktop\UTSA samples\DR041120HG06\Point  
 Measurement\_fragment\_22.apit  
 Acquired Datetime : 2022/11/11 13:07:22

### ● Search Parameters

Library list :  
 IRs Polymer2  
 ATR-Polymer2  
 T-Polymer2  
 Maximum hits: 200  
 Minimum quality : 0  
 Algorithm : DiffDeriv

| Score | Library      | Name  | Comment                             |
|-------|--------------|-------|-------------------------------------|
| 588   | ATR-Polymer2 | D_PC2 | Polycarbonate(PC)<br>DuraSamplIR-II |

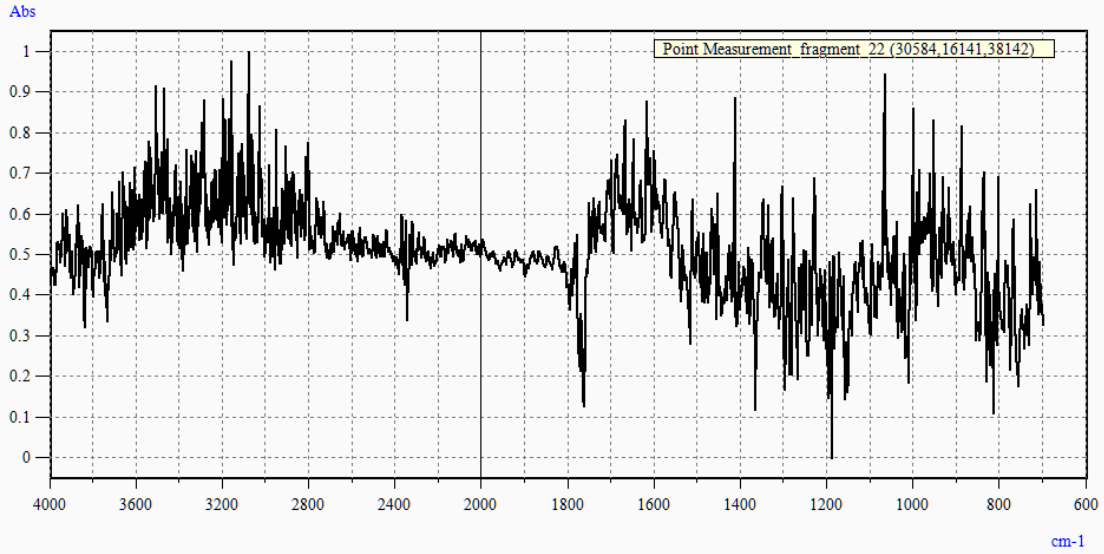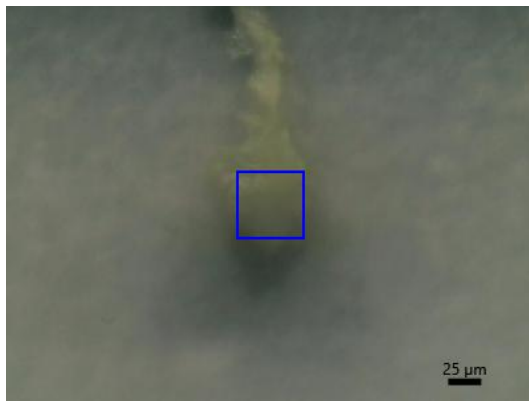

## Search Result Report

---

Filename : C:\Users\User\Desktop\UTSA samples\DR041120HG06\Point  
 Measurement\_fragment\_23.apit  
 Acquired Datetime : 2022/11/11 13:11:05

● **Search Parameters**

Library list :  
 IRs : Polymer2  
 ATR-Polymer2  
 T-Polymer2  
 Maximum hits: 200  
 Minimum quality : 0  
 Algorithm : DiffDeriv

| Score | Library    | Name           | Comment                                   |
|-------|------------|----------------|-------------------------------------------|
| 601   | T-Polymer2 | T_PhenoxyResin | Phenoxy Resin<br>Transmission(Microscope) |

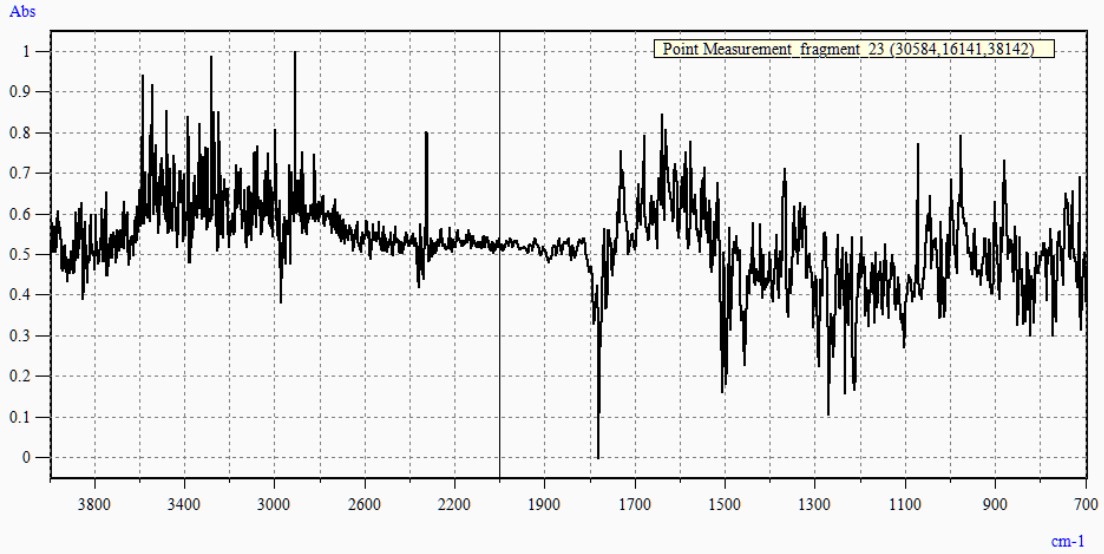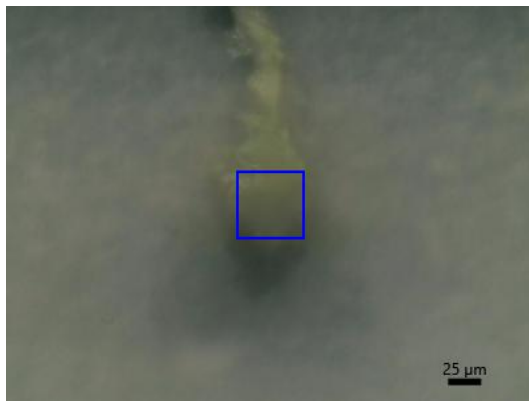

## Search Result Report

---

Filename : C:\Users\User\Desktop\UTSA samples\DR041120HG06\Point  
 Measurement\_fragment\_25.apit  
 Acquired Datetime : 2022/11/11 13:36:39

● **Search Parameters**

Library list :  
 IRs Polymer2  
 ATR-Polymer2  
 T-Polymer2  
 Maximum hits: 200  
 Minimum quality : 0  
 Algorithm : DiffDeriv

| Score | Library    | Name | Comment                                       |
|-------|------------|------|-----------------------------------------------|
| 647   | T-Polymer2 | PC   | Polycarbonate(PC)<br>Transmission(Microscope) |

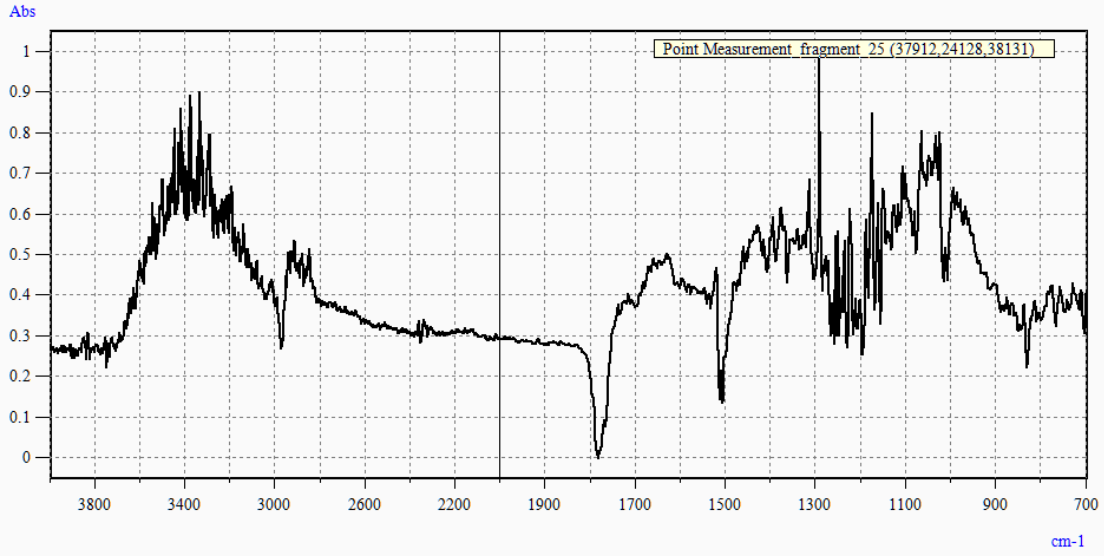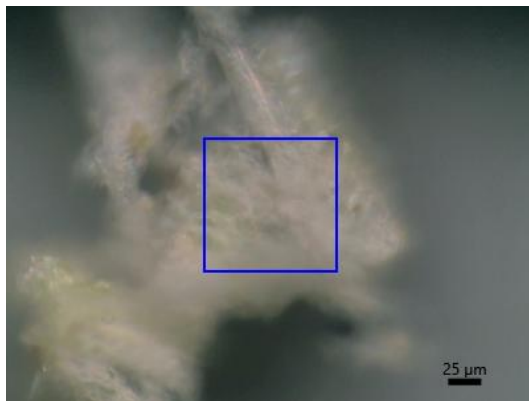

## Search Result Report

---

Filename : C:\Users\User\Desktop\UTSA samples\DR041120HG06\Point  
 Measurement\_fragment\_26.apit  
 Acquired Datetime : 2022/11/11 13:40:34

● **Search Parameters**

Library list :  
 IRs Polymer2  
 ATR-Polymer2  
 T-Polymer2  
 Maximum hits: 200  
 Minimum quality : 0  
 Algorithm : DiffDeriv

| Score | Library    | Name | Comment                                       |
|-------|------------|------|-----------------------------------------------|
| 592   | T-Polymer2 | PC   | Polycarbonate(PC)<br>Transmission(Microscope) |

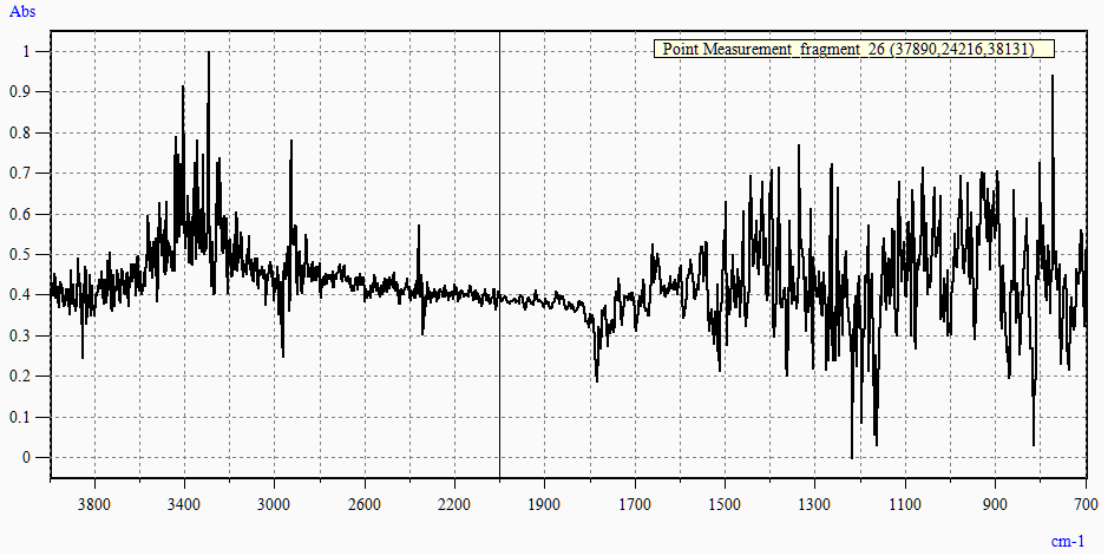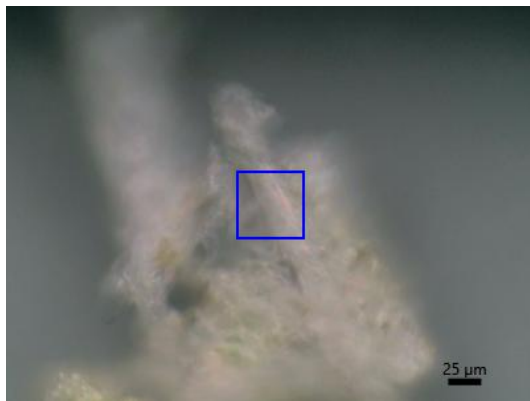

## Search Result Report

---

Filename : C:\Users\User\Desktop\UTSA samples\DR041120HG06\Point  
 Measurement\_fragment\_27.apit  
 Acquired Datetime : 2022/11/11 13:47:55

● **Search Parameters**

Library list :  
 IRs Polymer2  
 ATR-Polymer2  
 T-Polymer2  
 Maximum hits: 200  
 Minimum quality : 0  
 Algorithm : DiffDeriv

| Score | Library      | Name  | Comment                      |
|-------|--------------|-------|------------------------------|
| 663   | IRs Polymer2 | VLDPE | Low Density PolyethyleneFilm |

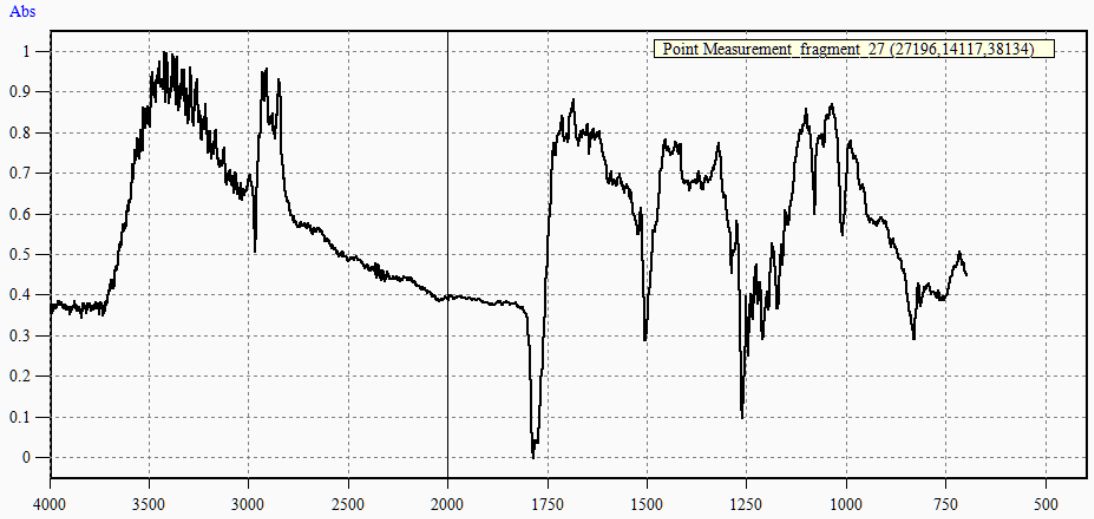

cm-1

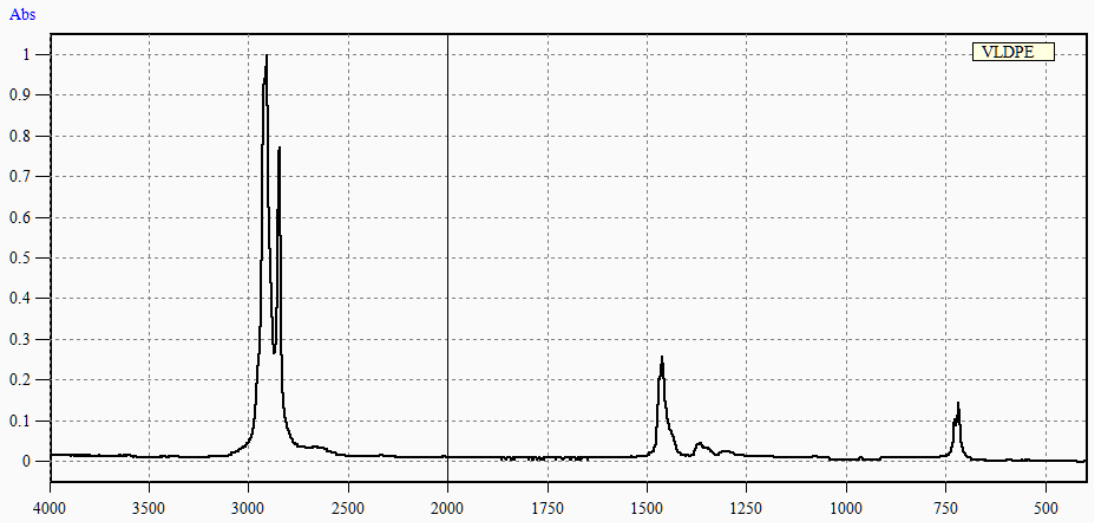

Low Density PolyethyleneFilm

cm-1

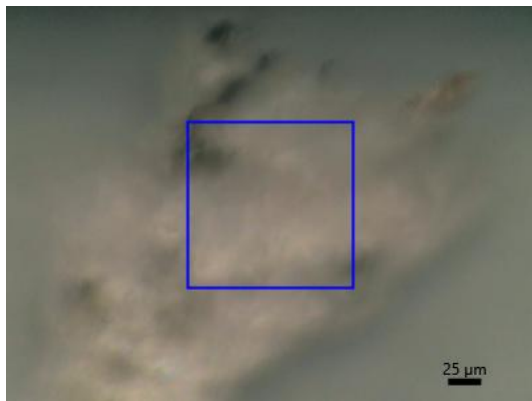

## Search Result Report

---

Filename : C:\Users\User\Desktop\UTSA samples\DR041120HG06\Point  
 Measurement\_fragment\_28.apit  
 Acquired Datetime : 2022/11/11 13:53:19

● **Search Parameters**

Library list :  
 IRs Polymer2  
 ATR-Polymer2  
 T-Polymer2  
 Maximum hits: 200  
 Minimum quality : 0  
 Algorithm : DiffDeriv

| Score | Library    | Name                | Comment                                       |
|-------|------------|---------------------|-----------------------------------------------|
| 611   | T-Polymer2 | T_1_2_Polybutadiene | 1,2-Polybutadiene<br>Transmission(Microscope) |

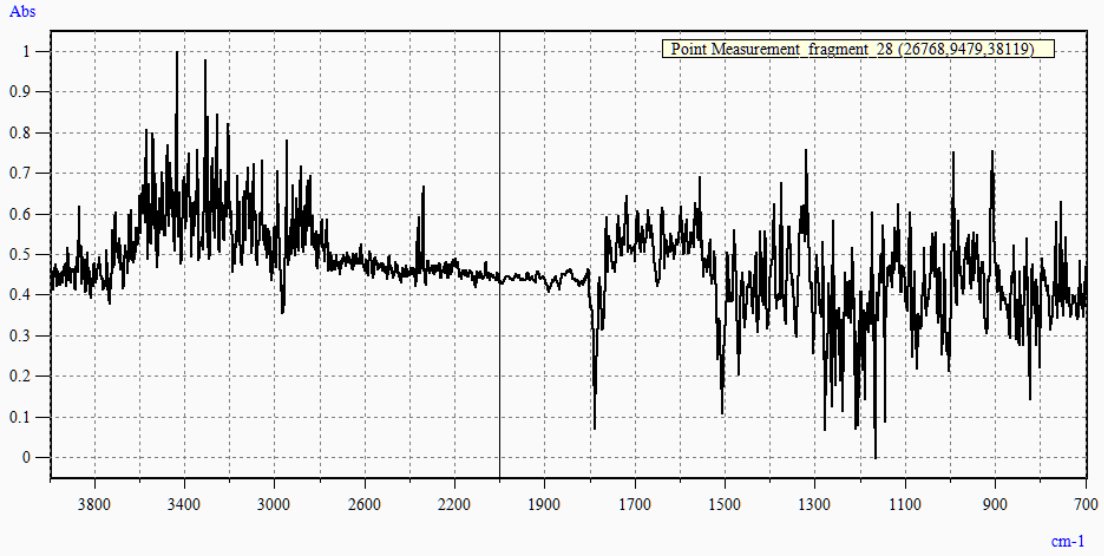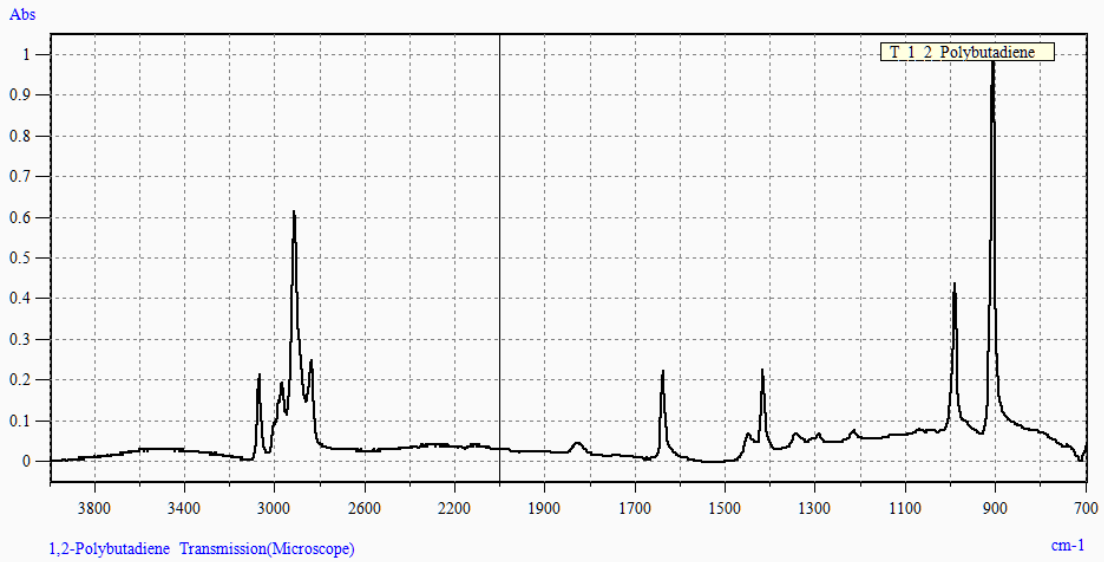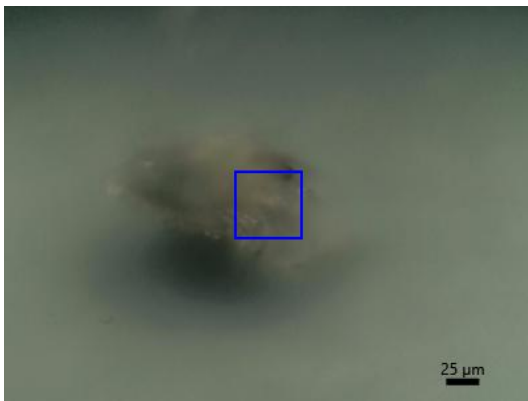

## Search Result Report

---

Filename : C:\Users\User\Desktop\UTSA samples\DR041120HJ03\Point  
 Measurement\_fragment\_44.apit  
 Acquired Datetime : 2022/11/11 16:32:27

● **Search Parameters**

Library list :  
 IRs Polymer2  
 ATR-Polymer2  
 T-Polymer2  
 Maximum hits: 200  
 Minimum quality : 0  
 Algorithm : DiffDeriv

| Score | Library      | Name | Comment                      |
|-------|--------------|------|------------------------------|
| 589   | IRs Polymer2 | BR3  | Polybutadiene High-transFilm |

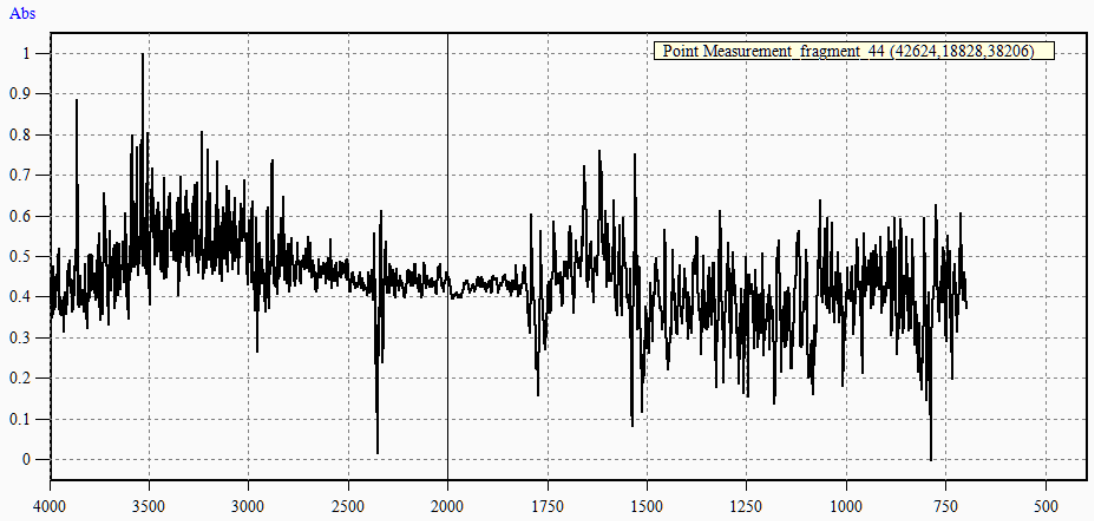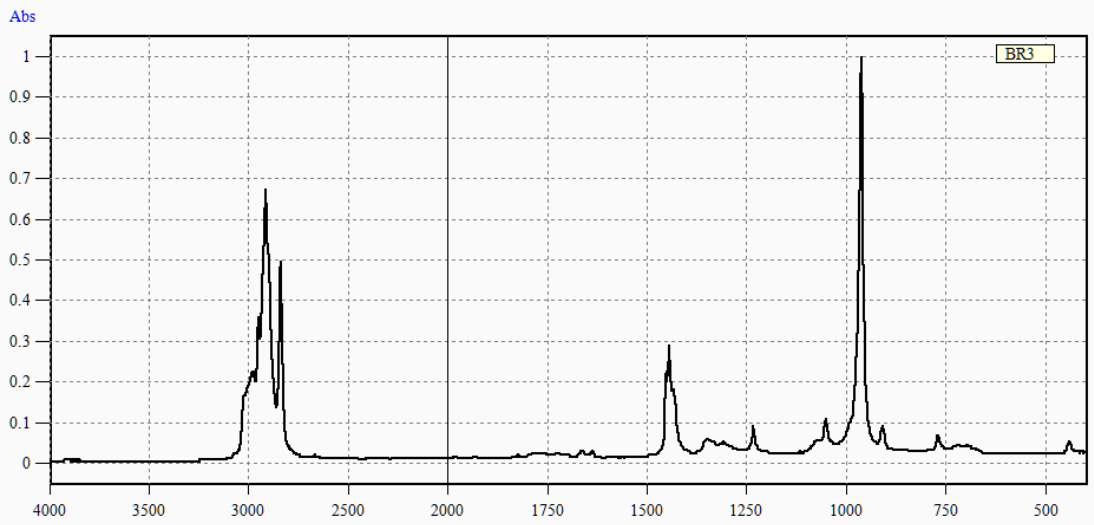

Polybutadiene High-transFilm

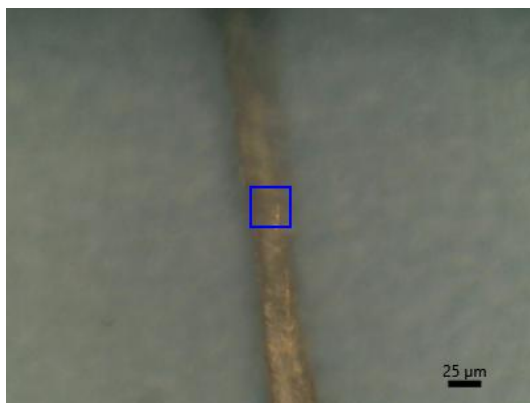

## Search Result Report

---

Filename : C:\Users\User\Desktop\UTSA samples\DR041120HJ03\Point  
 Measurement\_fragment\_45.apit  
 Acquired Datetime : 2022/11/11 16:38:09

● **Search Parameters**

Library list :  
 IRs Polymer2  
 ATR-Polymer2  
 T-Polymer2  
 Maximum hits: 200  
 Minimum quality : 0  
 Algorithm : DiffDeriv

| Score | Library      | Name                       | Comment                                                                  |
|-------|--------------|----------------------------|--------------------------------------------------------------------------|
| 591   | ATR-Polymer2 | D_Styrene_Maleic_Anhydride | Styrene/Maleic Anhydride<br>Copolymer(50/50 Copolymer)<br>DuraSamplIR-II |

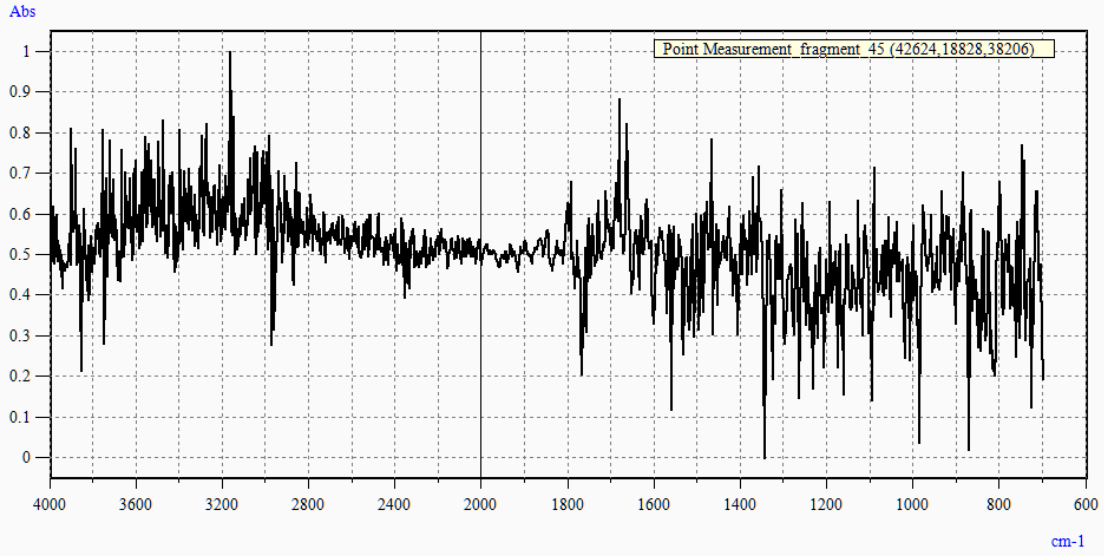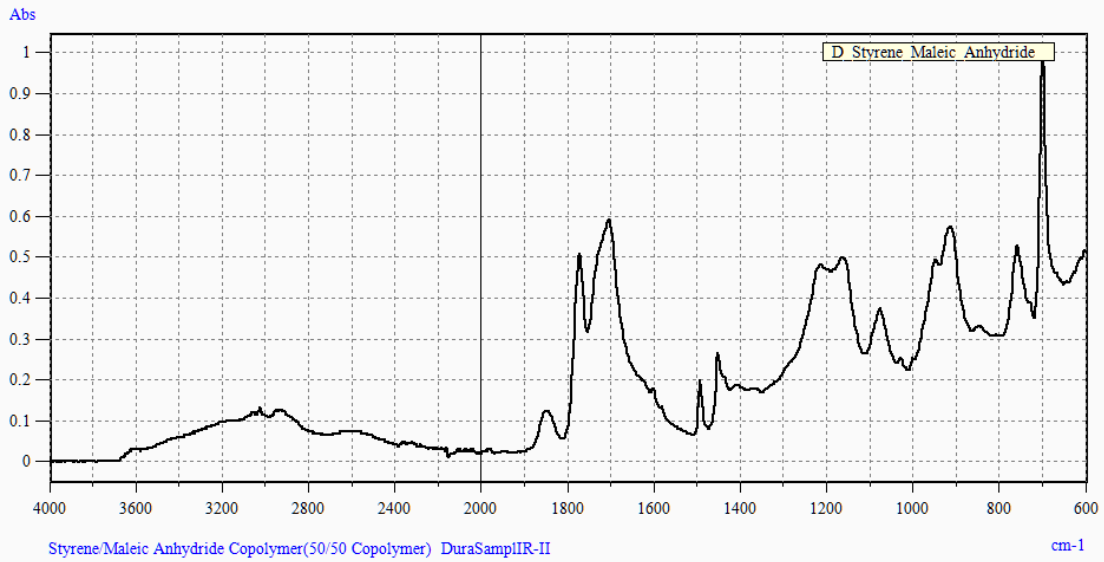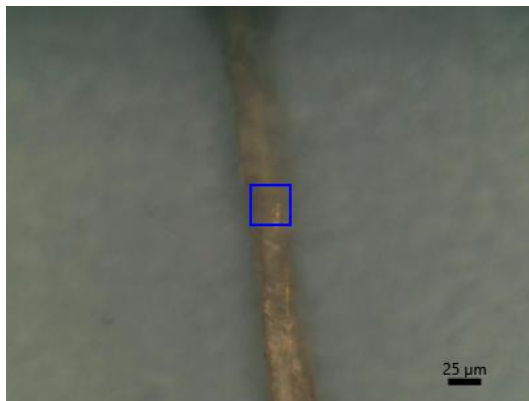

## Search Result Report

---

Filename : C:\Users\User\Desktop\UTSA samples\DR041120HJ03\Point  
 Measurement\_fragment\_46.apit  
 Acquired Datetime : 2022/11/11 16:40:41

● **Search Parameters**

Library list :  
 IRs Polymer2  
 ATR-Polymer2  
 T-Polymer2  
 Maximum hits: 200  
 Minimum quality : 0  
 Algorithm : DiffDeriv

| Score | Library      | Name   | Comment                             |
|-------|--------------|--------|-------------------------------------|
| 580   | IRs Polymer2 | NYLON6 | Nylon 6 ATR/diamond<br>ATRcorrected |

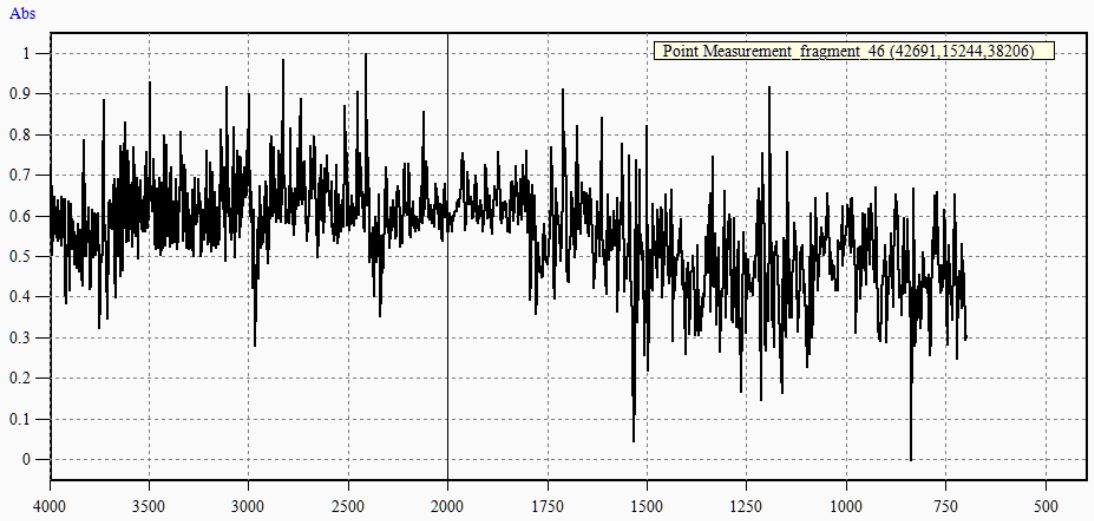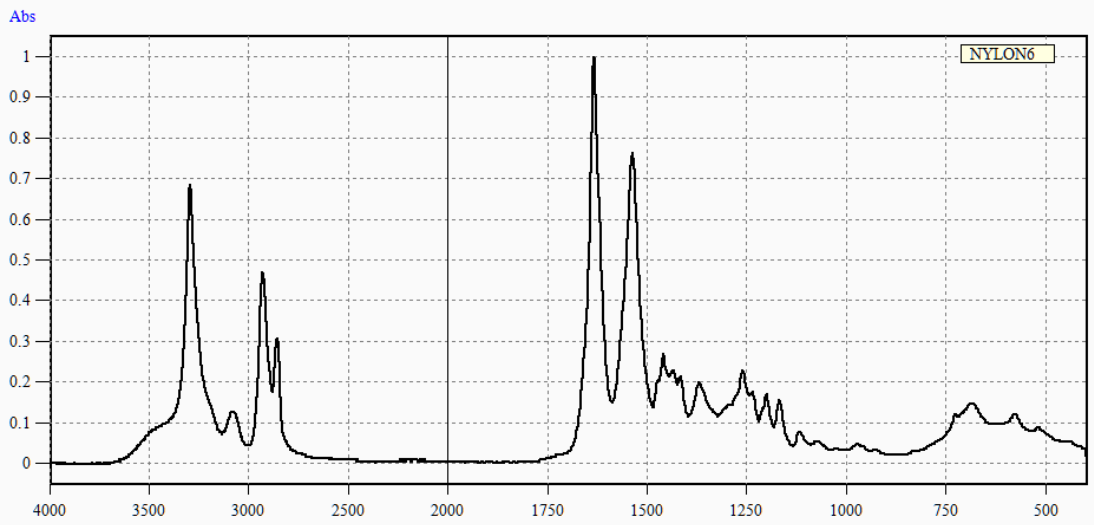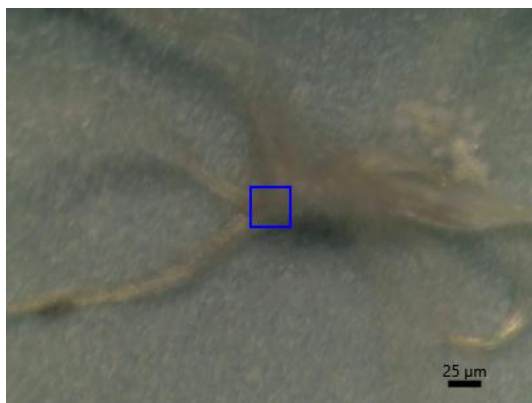

## Search Result Report

Filename : C:\Users\User\Desktop\UTSA samples\DR041120HJ03\Point  
 Measurement\_fragment\_47.apit  
 Acquired Datetime : 2022/11/11 16:43:59

### ● Search Parameters

Library list :  
 IRs Polymer2  
 ATR-Polymer2  
 T-Polymer2  
 Maximum hits: 200  
 Minimum quality : 0  
 Algorithm : DiffDeriv

| Score | Library      | Name       | Comment                                                                                                                                                     |
|-------|--------------|------------|-------------------------------------------------------------------------------------------------------------------------------------------------------------|
| 582   | IRs Polymer2 | SanolLS770 | Sanol LS770HINDERED AMINE LIGHT<br>STABILIZERBIS(2,2,6,6-TETRAMETHYL-<br>4-<br>PIPERIDYL)SEBACATEC28H52N2O4CAS<br>NO. 52829-07-9ATR/diamond<br>ATRcorrected |

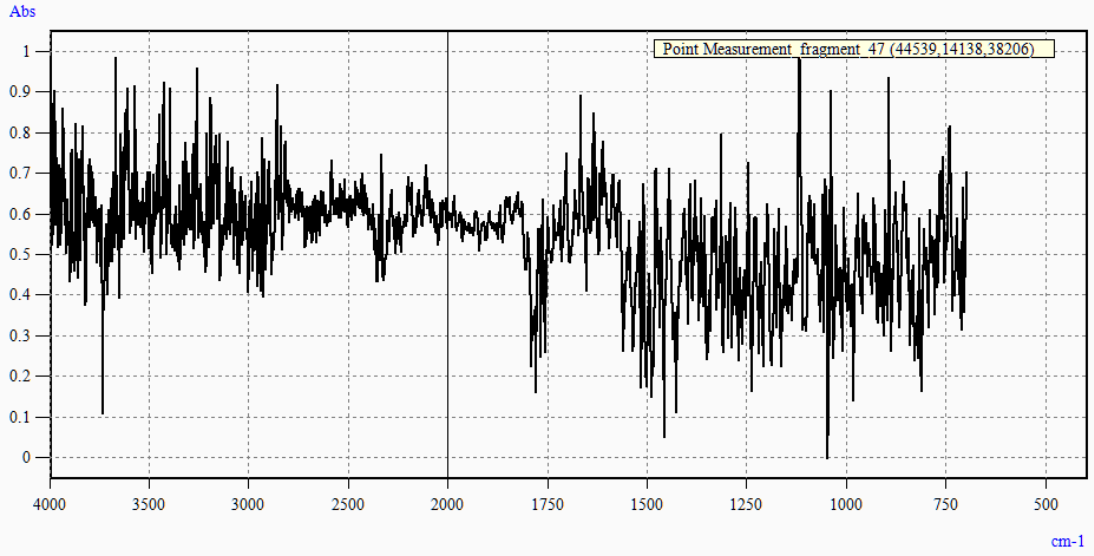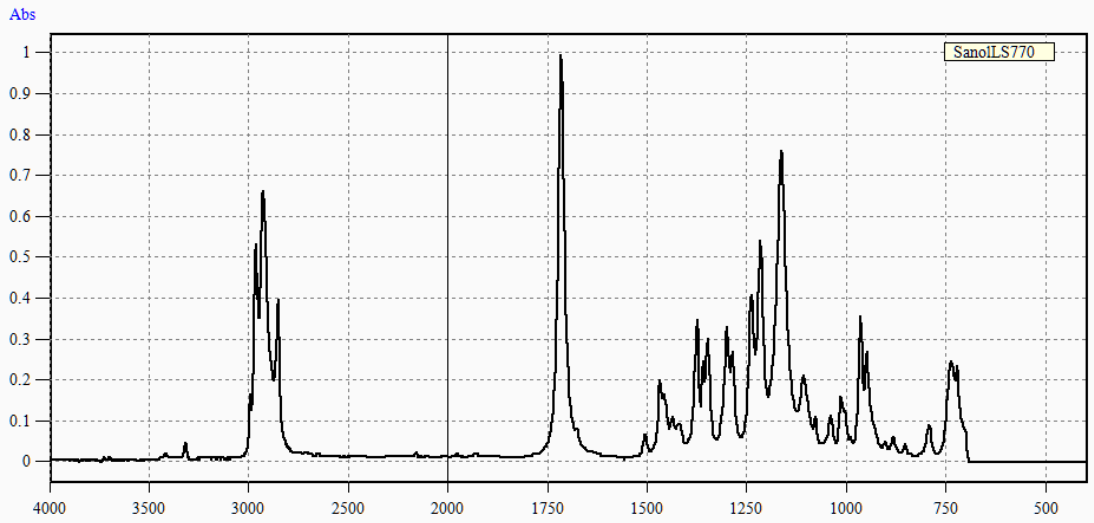

SanoL S770HINDERED AMINE LIGHT STABILIZERBIS(2,2,6,6-TETRAMETHYL-4-PIPERIDYL)SEBACATEC28H52N2O4CAS NO. 52829-0799ATR/dia

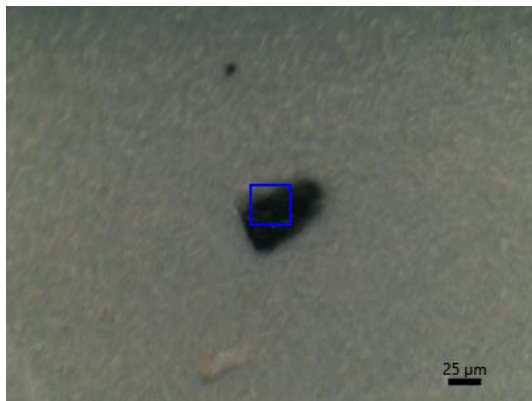

## Search Result Report

---

Filename : C:\Users\User\Desktop\UTSA samples\DR041120HJ03\Point  
 Measurement\_fragment\_48.apit  
 Acquired Datetime : 2022/11/11 16:51:22

● **Search Parameters**

Library list :  
 IRs Polymer2  
 ATR-Polymer2  
 T-Polymer2  
 Maximum hits: 200  
 Minimum quality : 0  
 Algorithm : DiffDeriv

| Score | Library      | Name | Comment             |
|-------|--------------|------|---------------------|
| 591   | IRs Polymer2 | PEI  | Poly etherimideFilm |

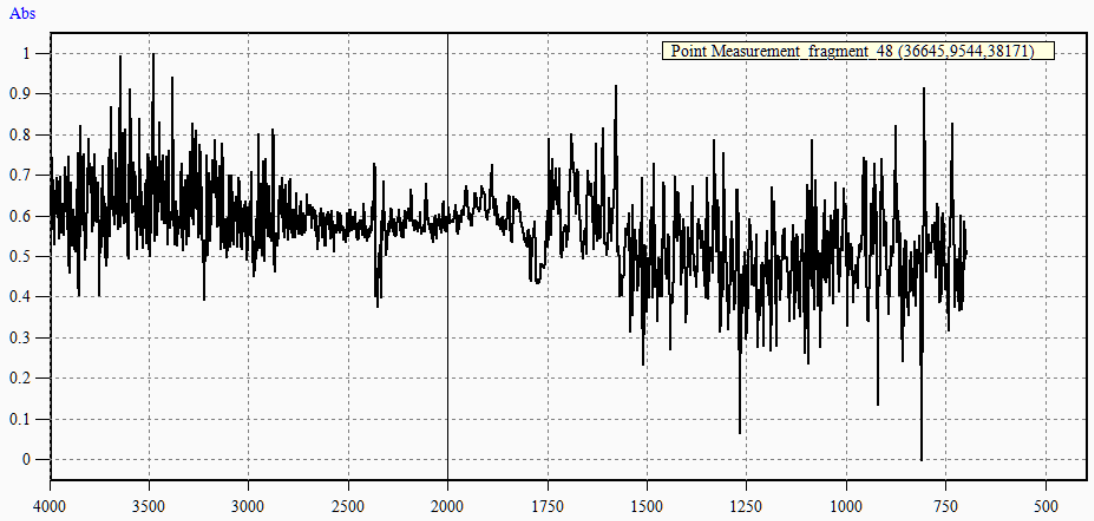

cm-1

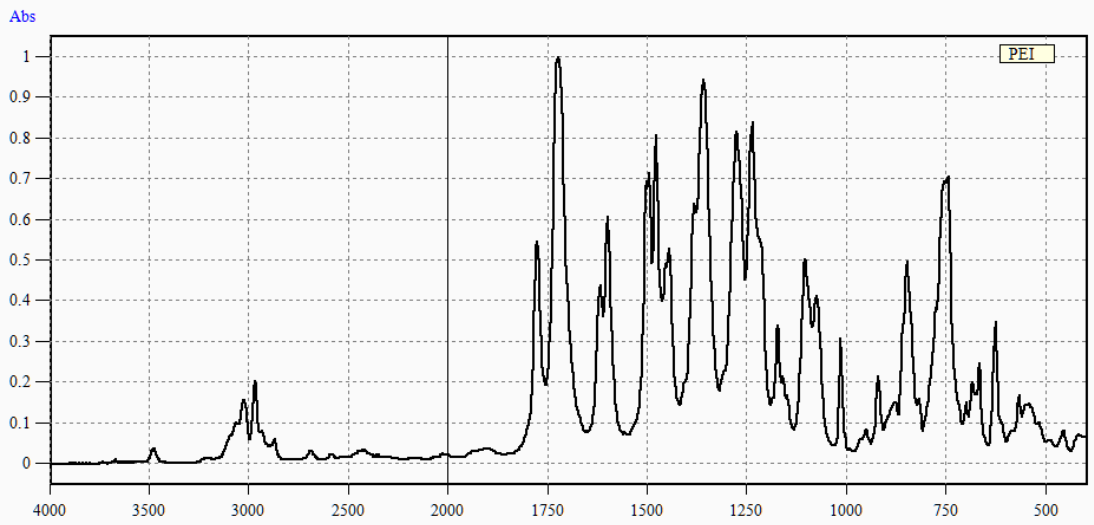

Poly etherimideFilm

cm-1

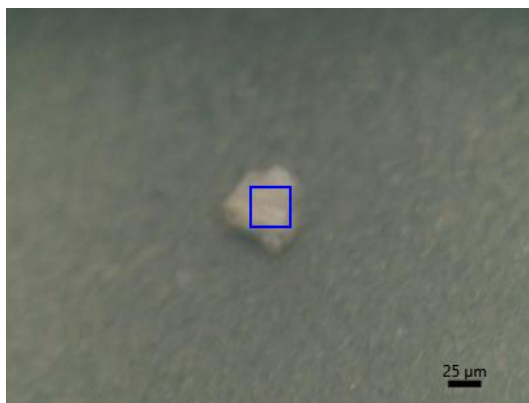

## Search Result Report

---

Filename : C:\Users\User\Desktop\UTSA samples\DR041120HJ03\Point  
 Measurement\_fragment\_49.apit  
 Acquired Datetime : 2022/11/11 16:53:53

● **Search Parameters**

Library list :  
 IRs Polymer2  
 ATR-Polymer2  
 T-Polymer2  
 Maximum hits: 200  
 Minimum quality : 0  
 Algorithm : DiffDeriv

| Score | Library      | Name | Comment                             |
|-------|--------------|------|-------------------------------------|
| 645   | ATR-Polymer2 | D_PC | Polycarbonate(PC)<br>DuraSamplIR-II |

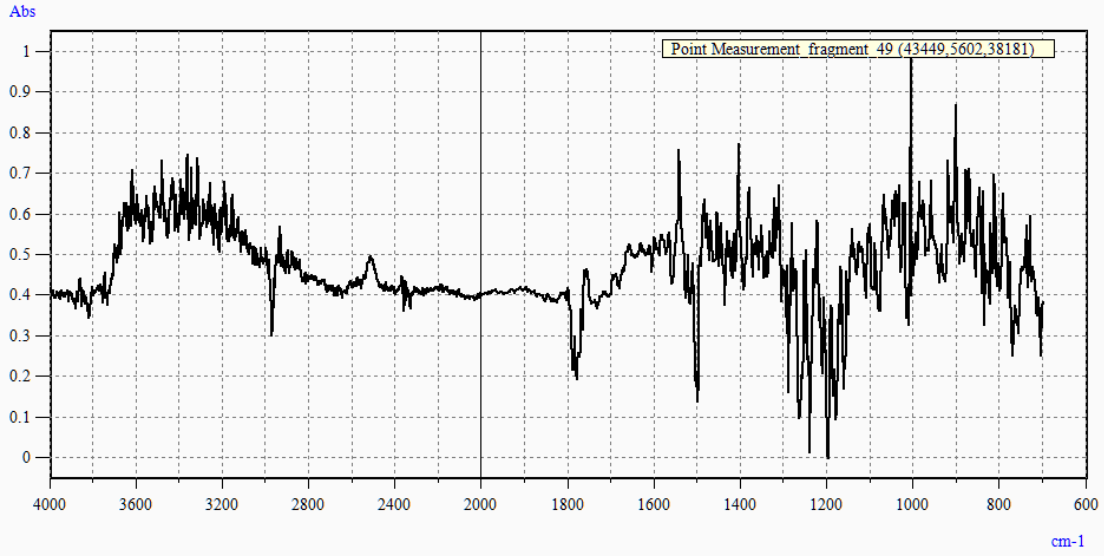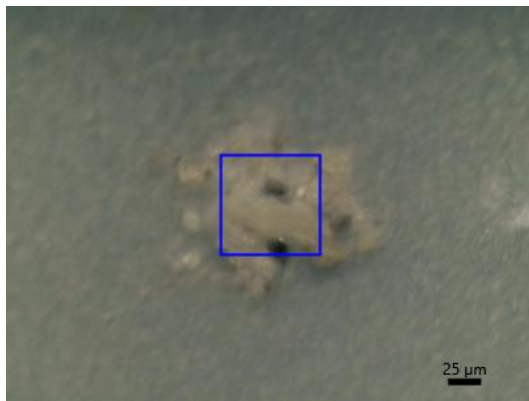

## Search Result Report

---

Filename : C:\Users\User\Desktop\UTSA samples\DR041120HJ03\Point  
 Measurement\_fragment\_50.apit  
 Acquired Datetime : 2022/11/11 16:57:16

● **Search Parameters**

Library list :  
 IRs Polymer2  
 ATR-Polymer2  
 T-Polymer2  
 Maximum hits: 200  
 Minimum quality : 0  
 Algorithm : DiffDeriv

| Score | Library    | Name | Comment                                               |
|-------|------------|------|-------------------------------------------------------|
| 587   | T-Polymer2 | PEG  | Polyethylene Glycol 20000<br>Transmission(Microscope) |

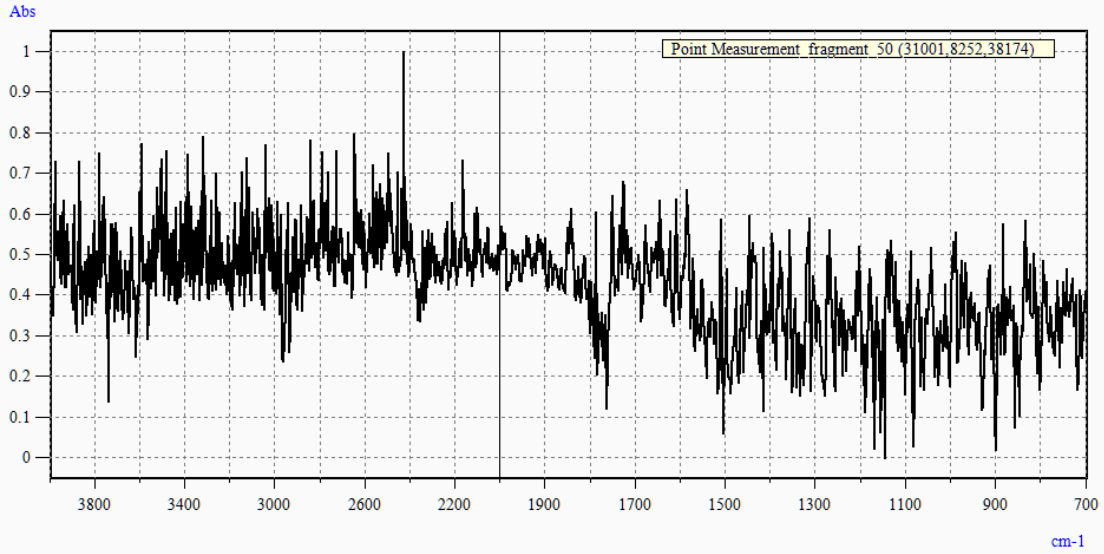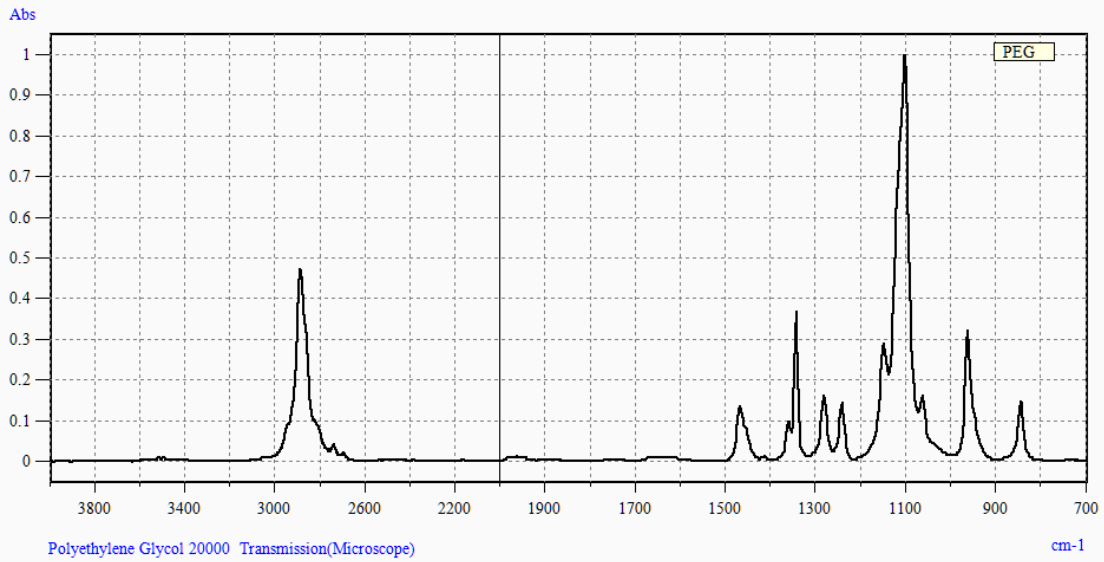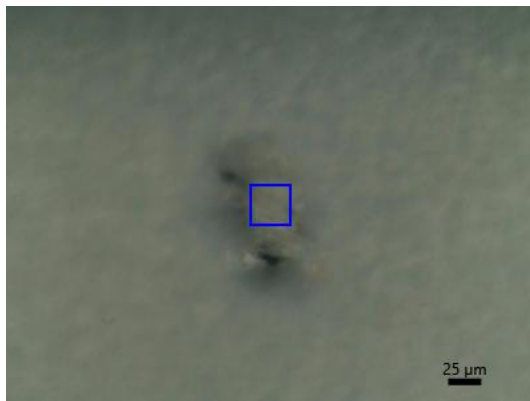

## Search Result Report

---

Filename : C:\Users\User\Desktop\UTSA samples\DR041120HJ28\Point  
 Measurement\_fiber\_1.apit  
 Acquired Datetime : 2022/11/11 10:17:32

● **Search Parameters**

Library list :  
 IRs Polymer2  
 ATR-Polymer2  
 T-Polymer2  
 Maximum hits: 200  
 Minimum quality : 0  
 Algorithm : DiffDeriv

| Score | Library    | Name   | Comment                                                     |
|-------|------------|--------|-------------------------------------------------------------|
| 570   | T-Polymer2 | T_HDPE | High Density Polyethylene(HDPE)<br>Transmission(Microscope) |

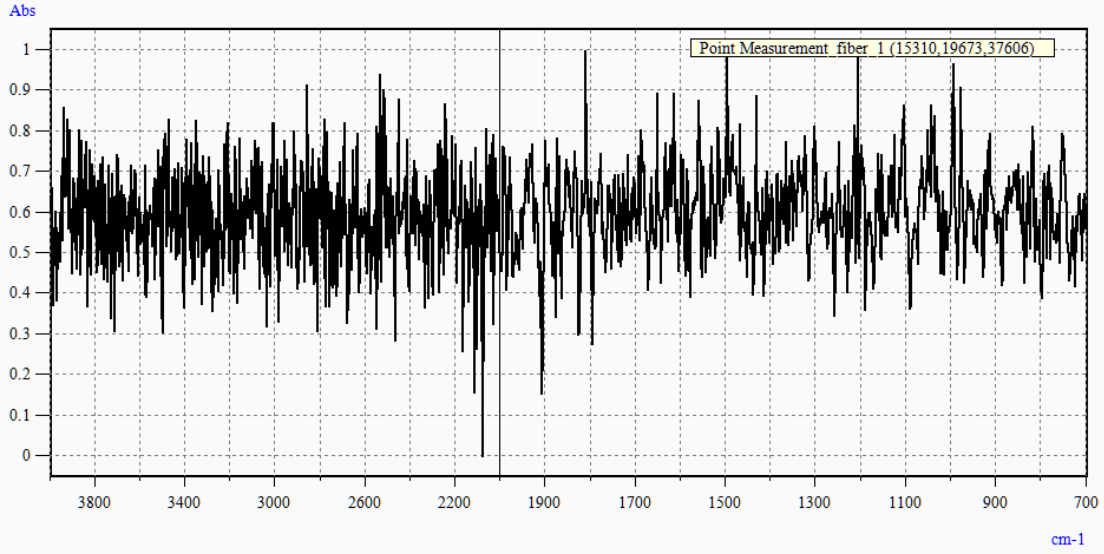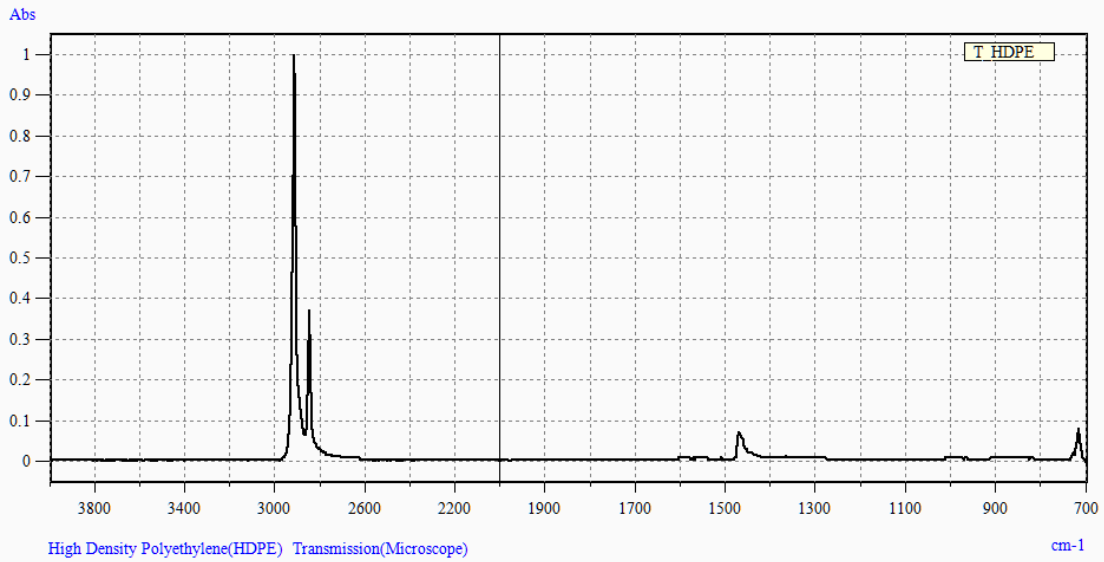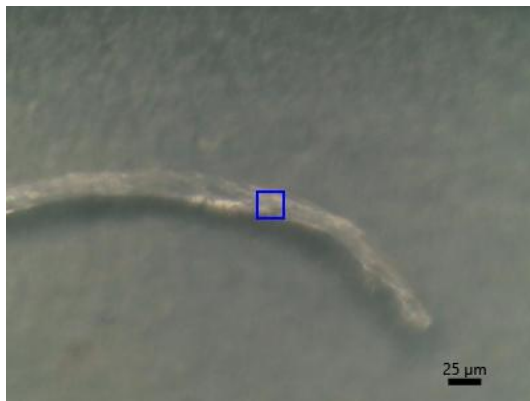

## Search Result Report

---

Filename : C:\Users\User\Desktop\UTSA samples\DR041120HJ28\Point

Measurement\_fiber\_2.apit

Acquired Datetime : 2022/11/11 10:33:09

● **Search Parameters**

Library list :

IRs Polymer2

ATR-Polymer2

T-Polymer2

Maximum hits: 200

Minimum quality : 0

Algorithm : DiffDeriv

| Score | Library    | Name | Comment                                       |
|-------|------------|------|-----------------------------------------------|
| 582   | T-Polymer2 | PC   | Polycarbonate(PC)<br>Transmission(Microscope) |

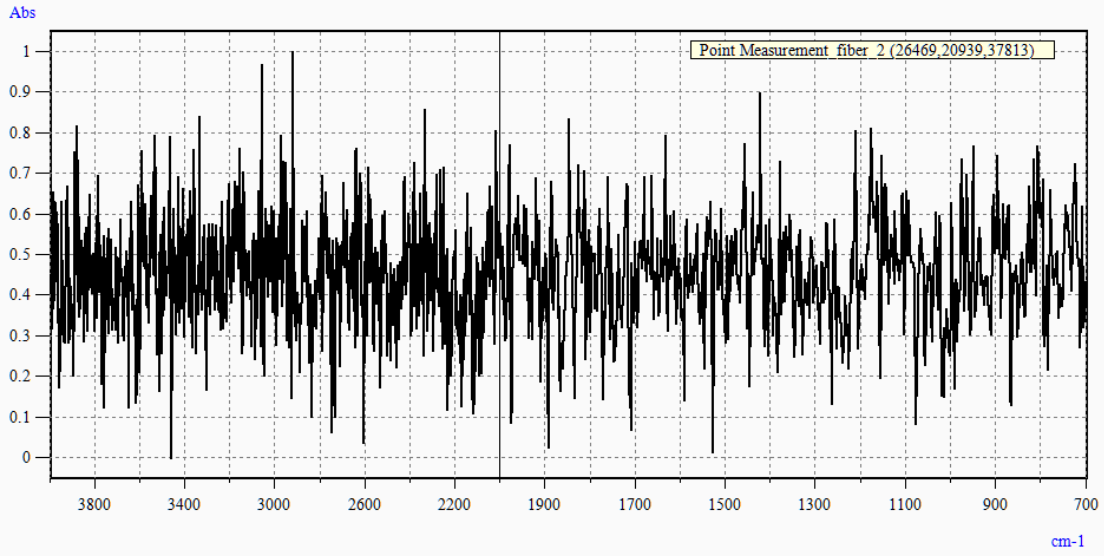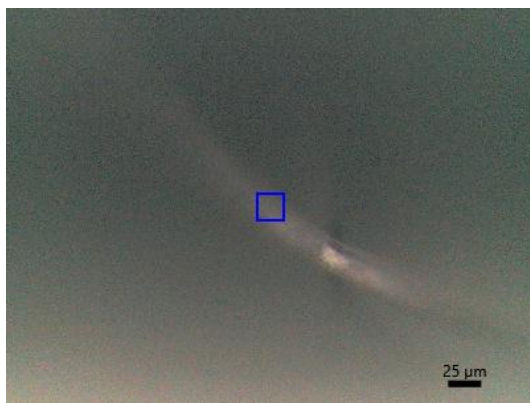

## Search Result Report

---

Filename : C:\Users\User\Desktop\UTSA samples\DR041120HJ28\Point  
 Measurement\_fiber\_3.apit  
 Acquired Datetime : 2022/11/11 10:42:07

● **Search Parameters**

Library list :  
 IRs Polymer2  
 ATR-Polymer2  
 T-Polymer2  
 Maximum hits: 200  
 Minimum quality : 0  
 Algorithm : DiffDeriv

| Score | Library      | Name   | Comment                                         |
|-------|--------------|--------|-------------------------------------------------|
| 572   | IRs Polymer2 | EPOXY1 | Epoxy resin (liquid)ATR/diamond<br>ATRcorrected |

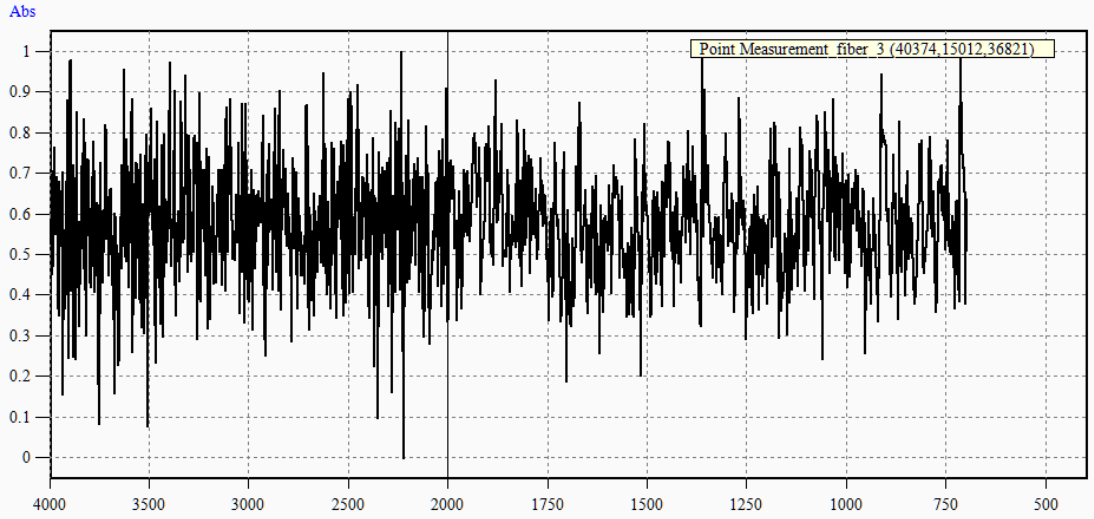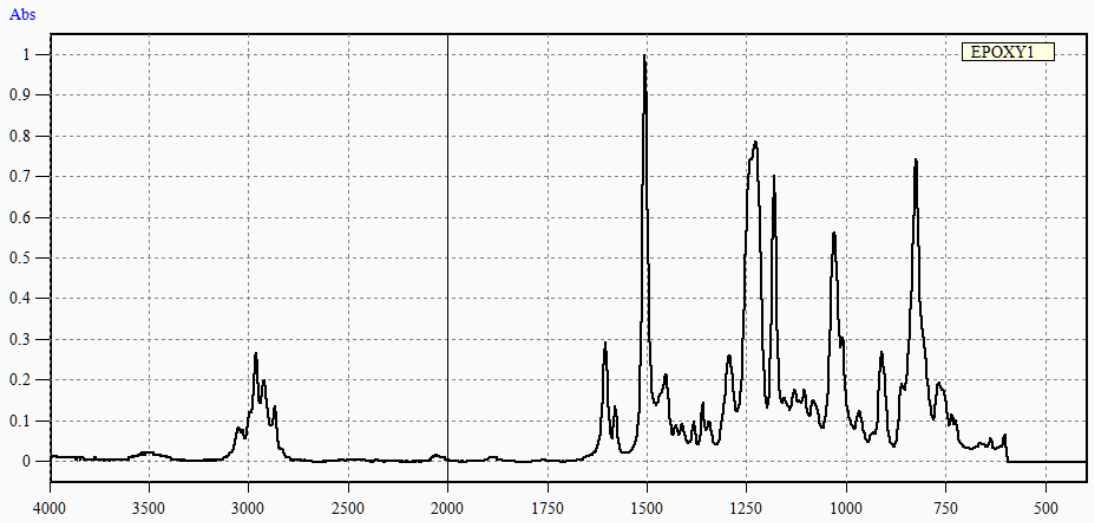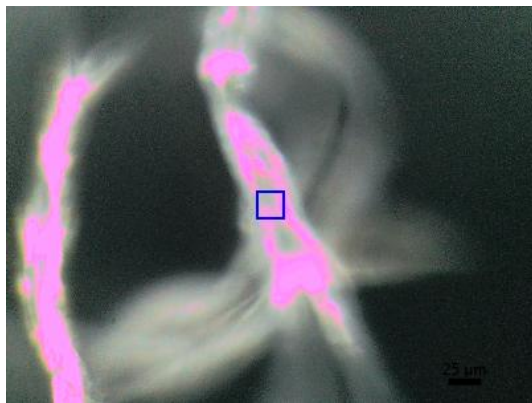

## Search Result Report

---

Filename : C:\Users\User\Desktop\UTSA samples\DR041120HJ28\Point

Measurement\_fiber\_5.apit

Acquired Datetime : 2022/11/11 11:29:08

● **Search Parameters**

Library list :

IRs Polymer2

ATR-Polymer2

T-Polymer2

Maximum hits: 200

Minimum quality : 0

Algorithm : DiffDeriv

| Score | Library      | Name  | Comment                                                                                   |
|-------|--------------|-------|-------------------------------------------------------------------------------------------|
| 591   | IRs Polymer2 | P-EPQ | P-EPQANTIOXIDANT<br>PHOSPHONITE<br>COMPOUND C68H92O4P2CAS<br>NO. ATR/diamond ATRcorrected |

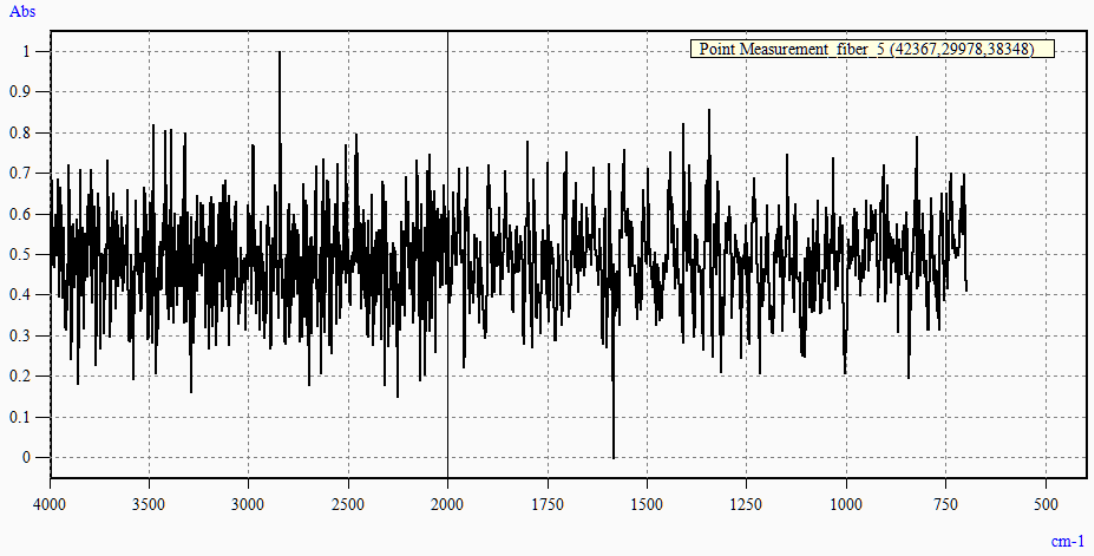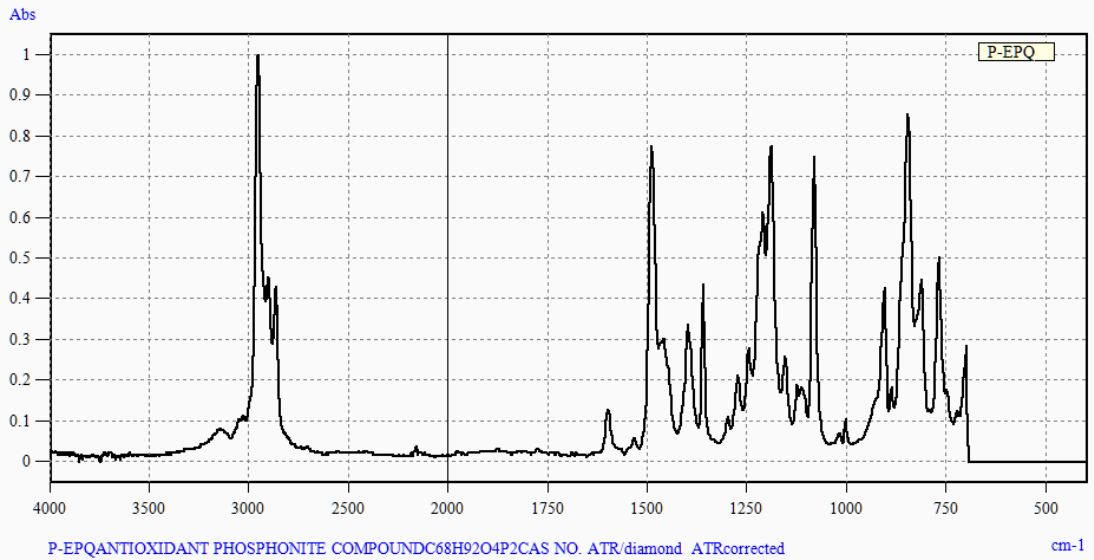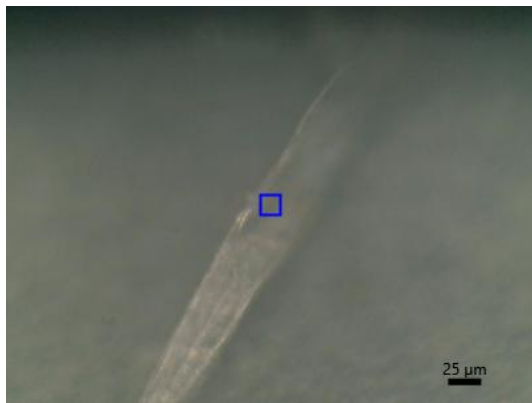

## Search Result Report

---

Filename : C:\Users\User\Desktop\UTSA samples\DR041120HJ28\Point

Measurement\_fiber\_4.apit

Acquired Datetime : 2022/11/11 11:01:18

● **Search Parameters**

Library list :

IRs Polymer2

ATR-Polymer2

T-Polymer2

Maximum hits: 200

Minimum quality : 0

Algorithm : DiffDeriv

| Score | Library    | Name      | Comment                                                                    |
|-------|------------|-----------|----------------------------------------------------------------------------|
| 599   | T-Polymer2 | Polyester | Polyester Film(TOYOBO ESTER FILM & ESPET FILM)<br>Transmission(Microscope) |

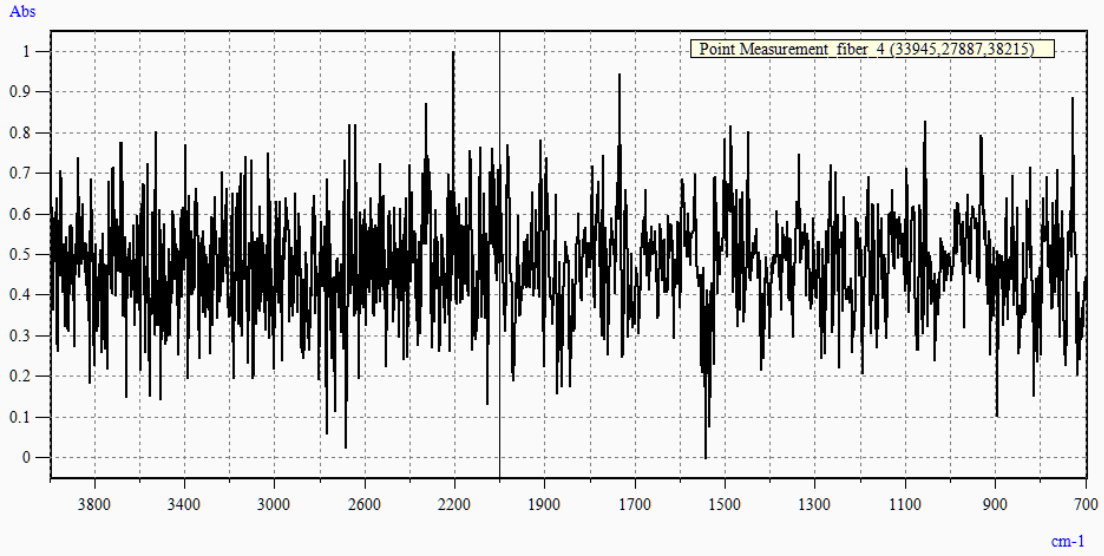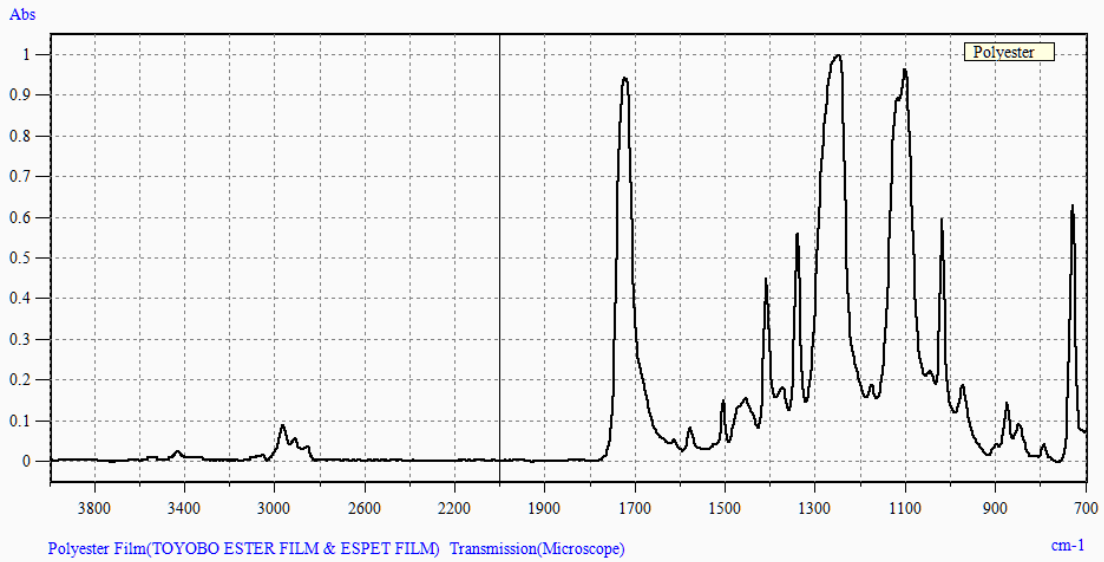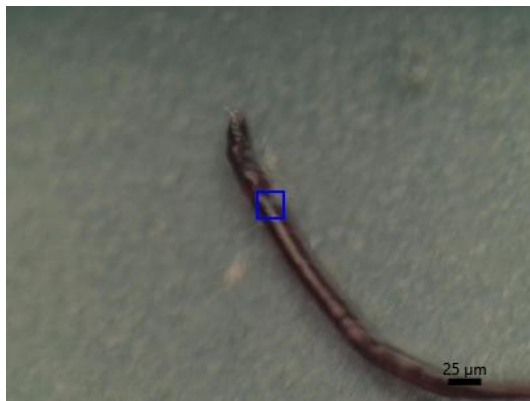

## Search Result Report

---

Filename : C:\Users\User\Desktop\UTSA samples\DR041120HM01\Point  
 Measurement\_fragment\_82.apit  
 Acquired Datetime : 2022/11/11 21:12:55

● **Search Parameters**

Library list :  
 IRs Polymer2  
 ATR-Polymer2  
 T-Polymer2  
 Maximum hits: 200  
 Minimum quality : 0  
 Algorithm : DiffDeriv

| Score | Library      | Name | Comment                             |
|-------|--------------|------|-------------------------------------|
| 628   | ATR-Polymer2 | D_PC | Polycarbonate(PC)<br>DuraSamplIR-II |

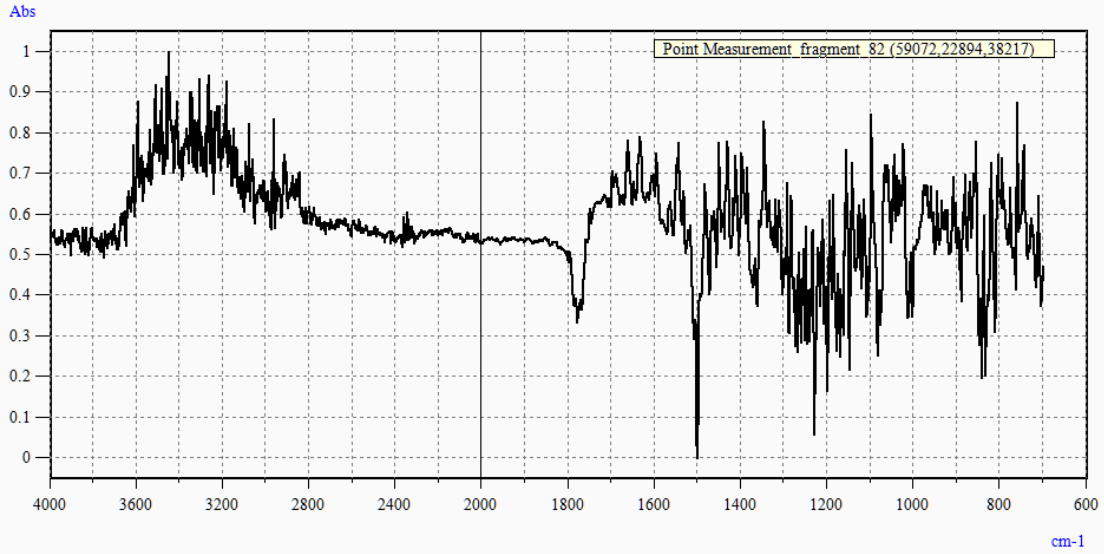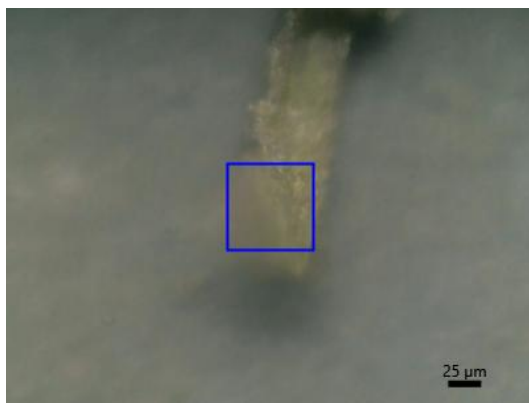

## Search Result Report

---

Filename : C:\Users\User\Desktop\UTSA samples\DR041120HM01\Point  
 Measurement\_fragment\_83.apit  
 Acquired Datetime : 2022/11/11 21:17:23

● **Search Parameters**

Library list :  
 IRs Polymer2  
 ATR-Polymer2  
 T-Polymer2  
 Maximum hits: 200  
 Minimum quality : 0  
 Algorithm : DiffDeriv

| Score | Library    | Name      | Comment                                                                    |
|-------|------------|-----------|----------------------------------------------------------------------------|
| 579   | T-Polymer2 | Polyester | Polyester Film(TOYOBO ESTER FILM & ESPET FILM)<br>Transmission(Microscope) |

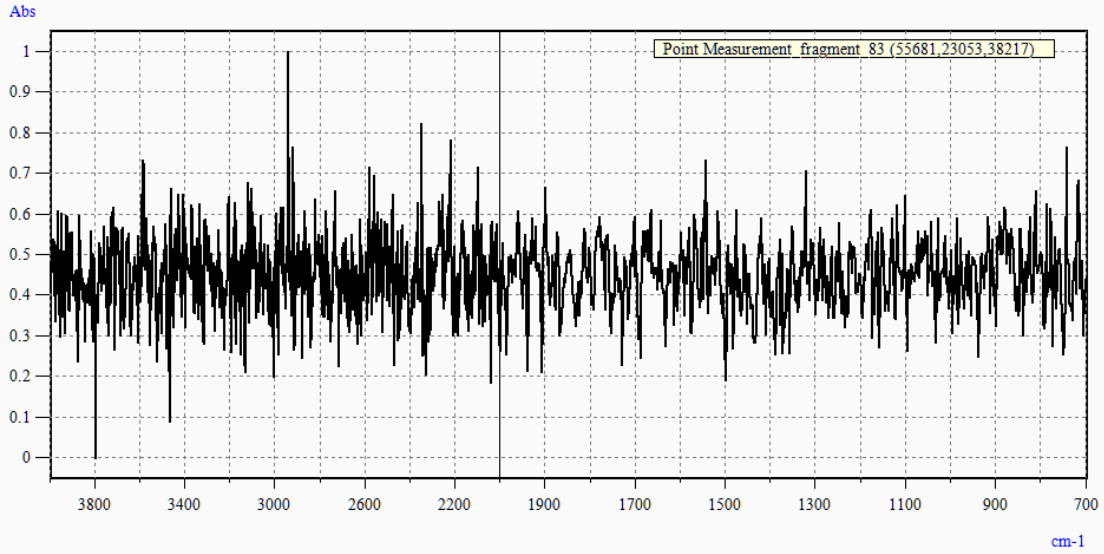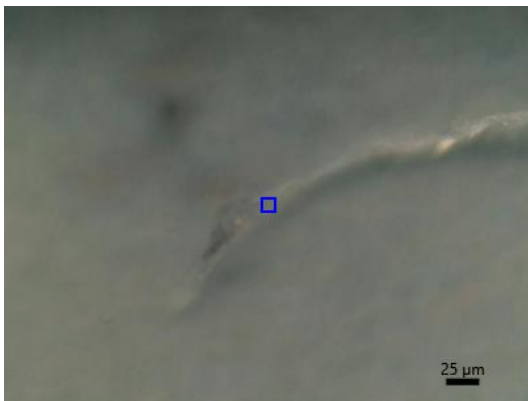

## Search Result Report

Filename : C:\Users\User\Desktop\UTSA samples\DR041120HM01\Point  
 Measurement\_fragment\_84.apit  
 Acquired Datetime : 2022/11/11 21:23:07

### ● Search Parameters

Library list :  
 IRs Polymer2  
 ATR-Polymer2  
 T-Polymer2  
 Maximum hits: 200  
 Minimum quality : 0  
 Algorithm : DiffDeriv

| Score | Library      | Name                             | Comment                                                                      |
|-------|--------------|----------------------------------|------------------------------------------------------------------------------|
| 626   | ATR-Polymer2 | D_PVC with PhenoricSulfonicEster | Polyvinylchloride with Phenolic ester of aliphatic sulfonic acid DuraSamplIR |

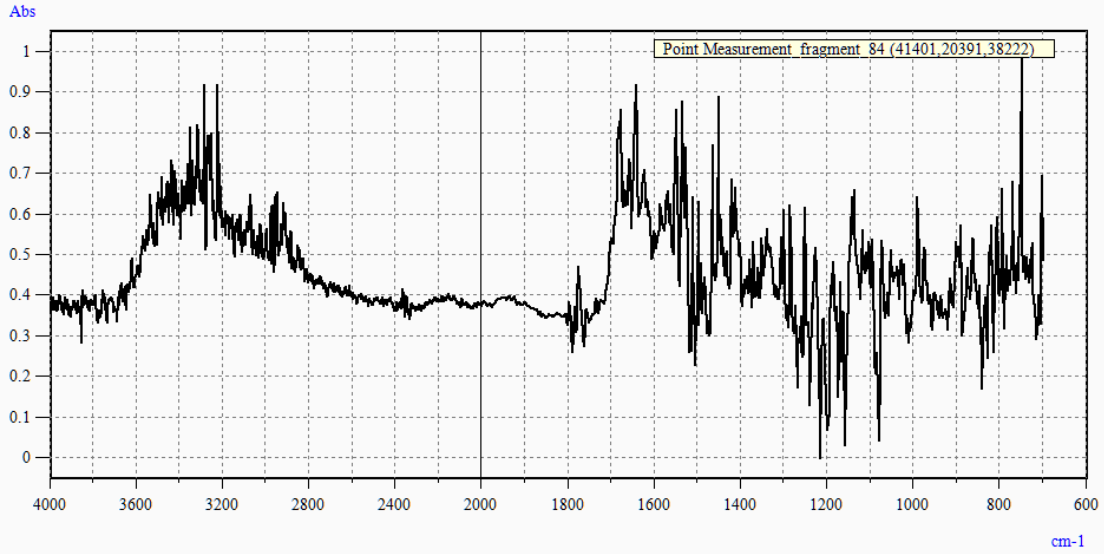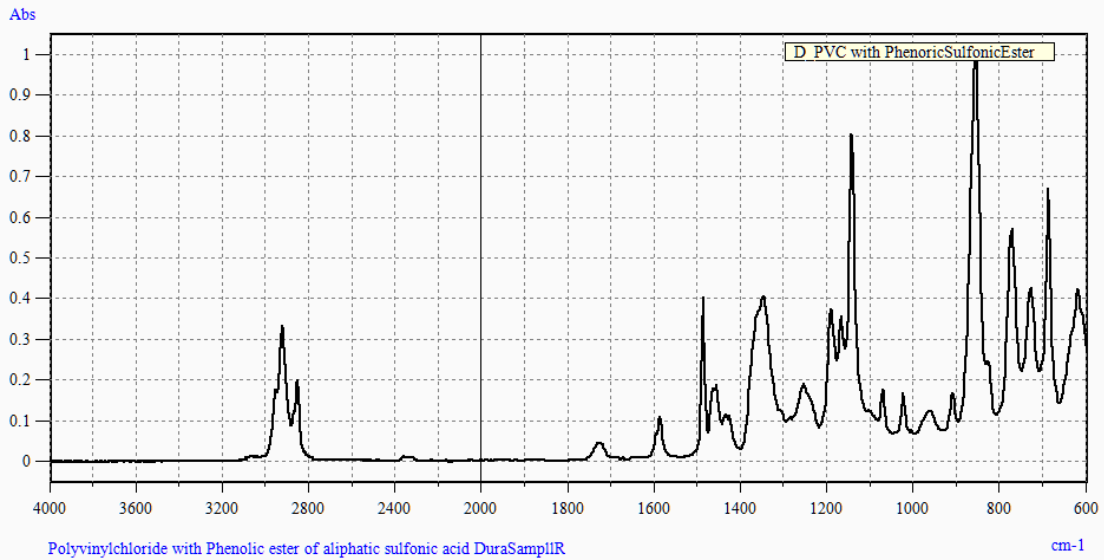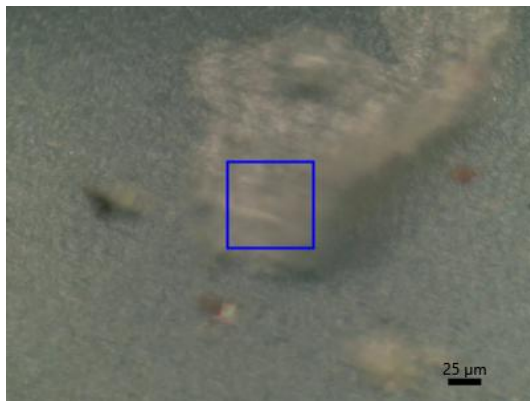

## Search Result Report

---

Filename : C:\Users\User\Desktop\UTSA samples\DR041120HM01\Point  
 Measurement\_fragment\_85.apit  
 Acquired Datetime : 2022/11/11 21:27:27

● **Search Parameters**

Library list :  
 IRs Polymer2  
 ATR-Polymer2  
 T-Polymer2  
 Maximum hits: 200  
 Minimum quality : 0  
 Algorithm : DiffDeriv

| Score | Library      | Name        | Comment                                         |
|-------|--------------|-------------|-------------------------------------------------|
| 591   | ATR-Polymer2 | D_Additive4 | Polymer Additive(Irganox MD1024) DuraSamplIR-II |

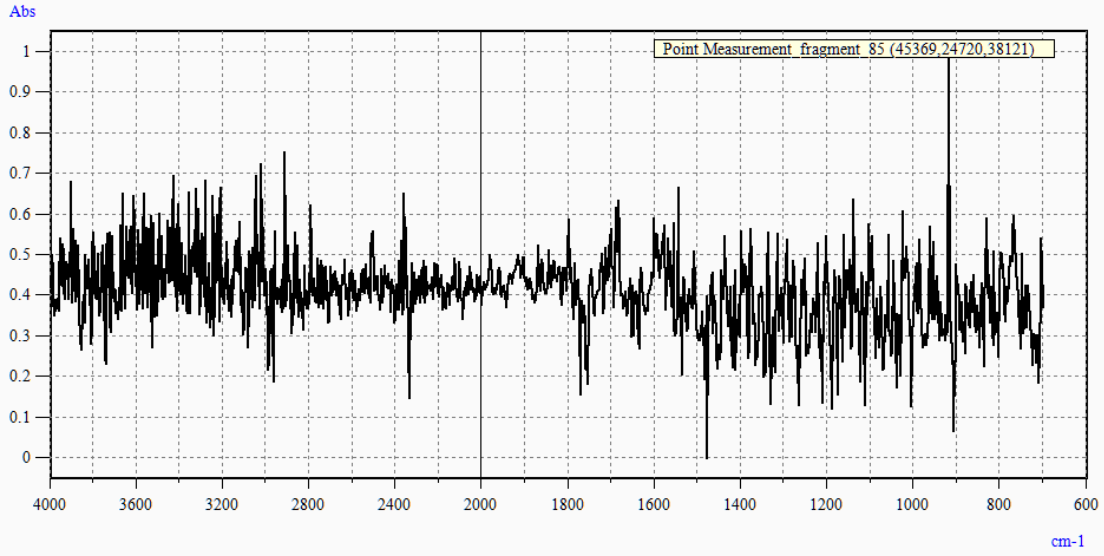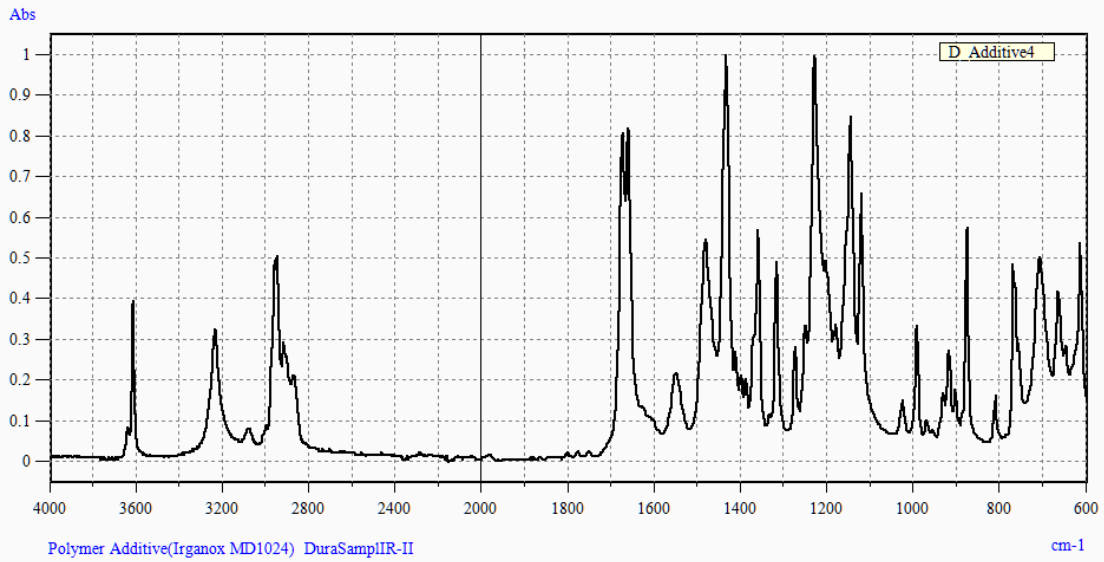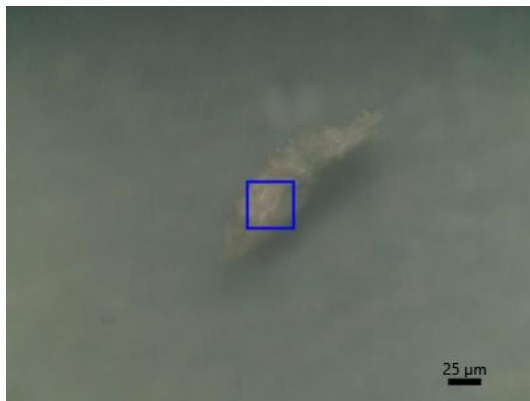

## Search Result Report

Filename : C:\Users\User\Desktop\UTSA samples\DR041120HM01\Point  
 Measurement\_fragment\_86.apit  
 Acquired Datetime : 2022/11/11 21:30:56

### ● Search Parameters

Library list :  
 IRs Polymer2  
 ATR-Polymer2  
 T-Polymer2  
 Maximum hits: 200  
 Minimum quality : 0  
 Algorithm : DiffDeriv

| Score | Library      | Name            | Comment                                                                                               |
|-------|--------------|-----------------|-------------------------------------------------------------------------------------------------------|
| 595   | IRs Polymer2 | Chimassorb944LD | Chimassorb 944LDHINDERED AMINE LIGHT STABILIZER (POLYMERIC)CAS NO. 71878-19-8ATR/diamond ATRcorrected |

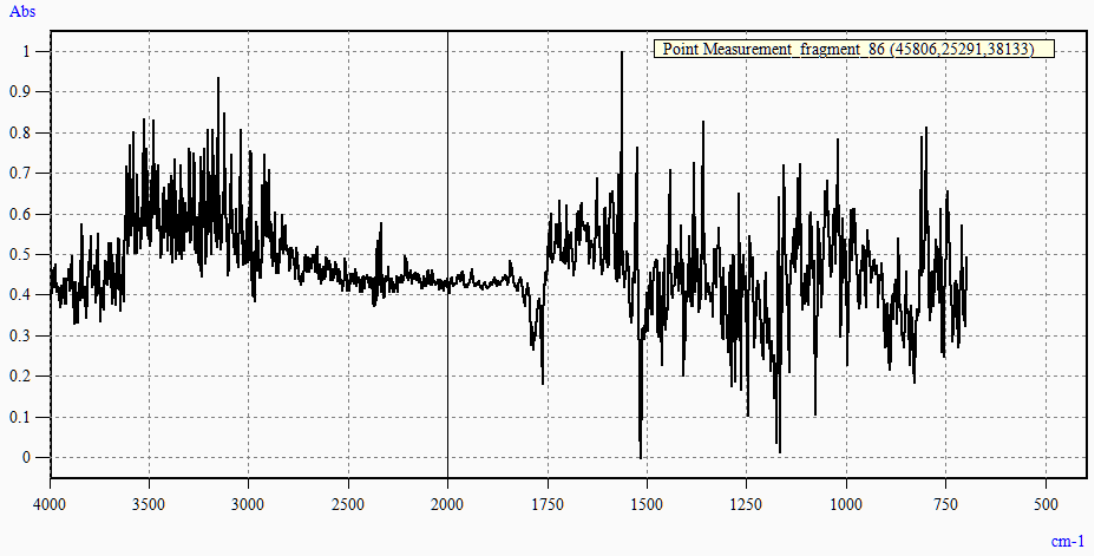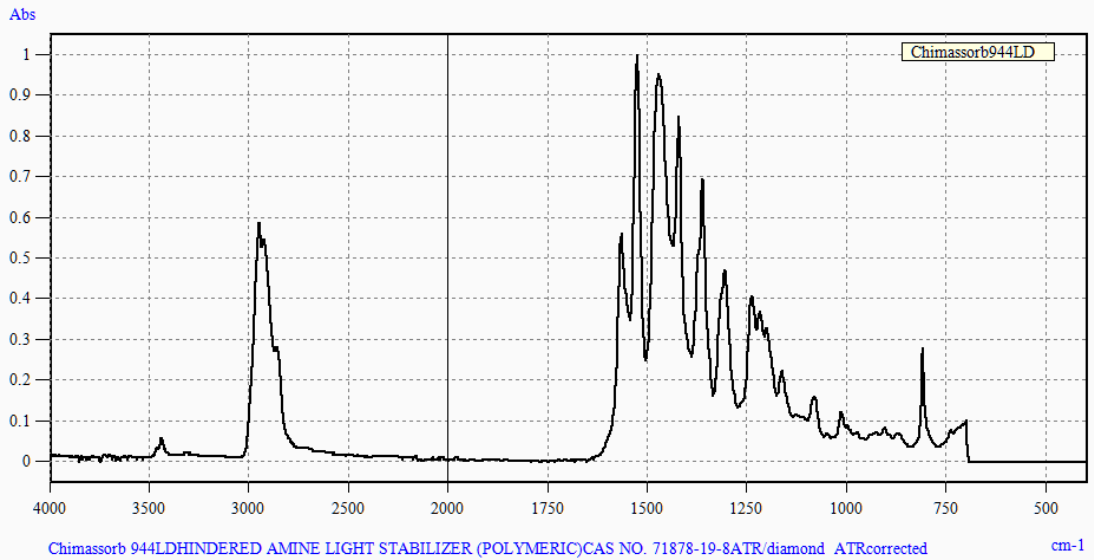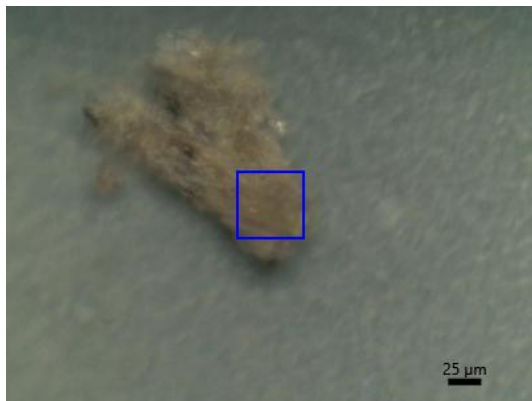

## Search Result Report

---

Filename : C:\Users\User\Desktop\UTSA samples\DR041120HM01\Point  
 Measurement\_fragment\_87.apit  
 Acquired Datetime : 2022/11/11 21:49:11

● **Search Parameters**

Library list :  
 IRs Polymer2  
 ATR-Polymer2  
 T-Polymer2  
 Maximum hits: 200  
 Minimum quality : 0  
 Algorithm : DiffDeriv

| Score | Library      | Name          | Comment                    |
|-------|--------------|---------------|----------------------------|
| 607   | ATR-Polymer2 | D_Polysulfone | Polysulfone DuraSamplIR-II |

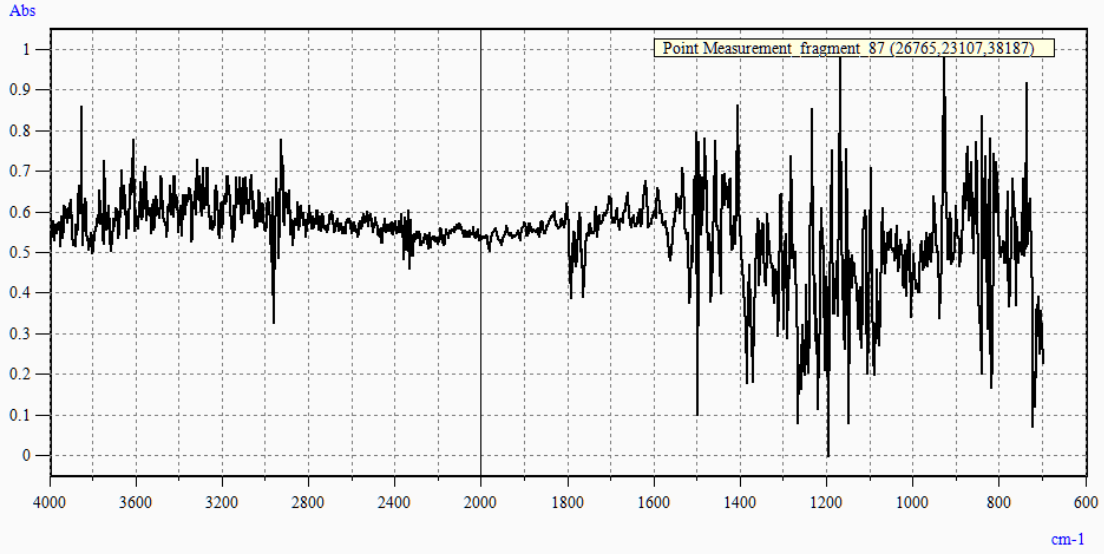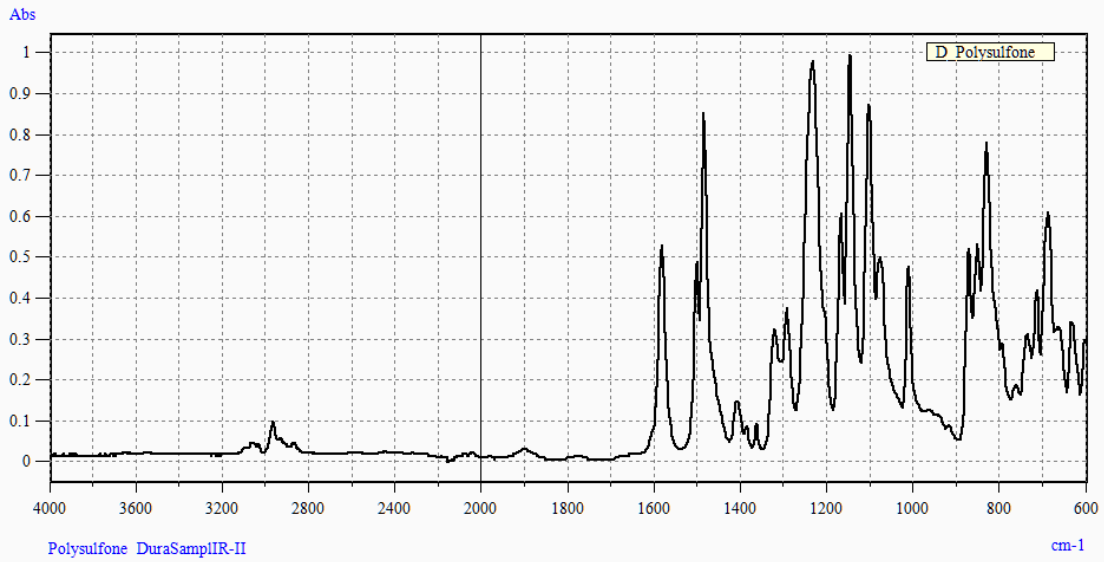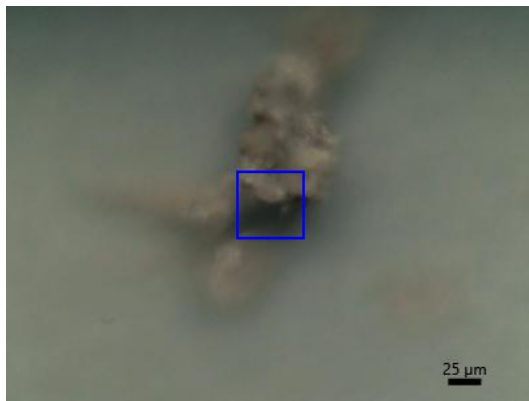

## Search Result Report

---

Filename : C:\Users\User\Desktop\UTSA samples\DR041120HM01\Point  
 Measurement\_fragment\_88.apit

Acquired Datetime : 2022/11/11 21:53:36

● **Search Parameters**

Library list :

IRs Polymer2

ATR-Polymer2

T-Polymer2

Maximum hits: 200

Minimum quality : 0

Algorithm : DiffDeriv

| Score | Library    | Name                | Comment                                       |
|-------|------------|---------------------|-----------------------------------------------|
| 594   | T-Polymer2 | T_1_2_Polybutadiene | 1,2-Polybutadiene<br>Transmission(Microscope) |

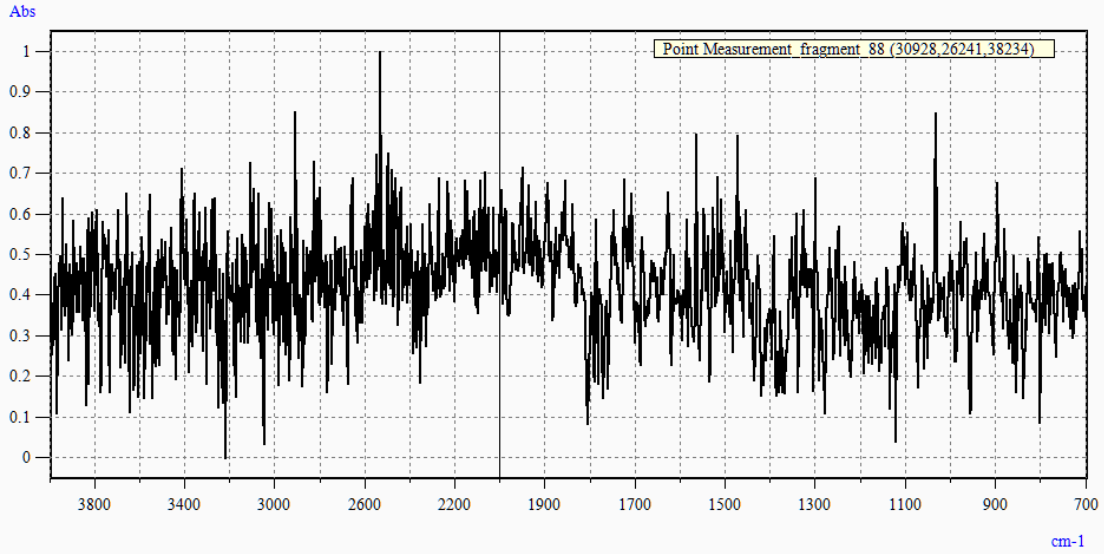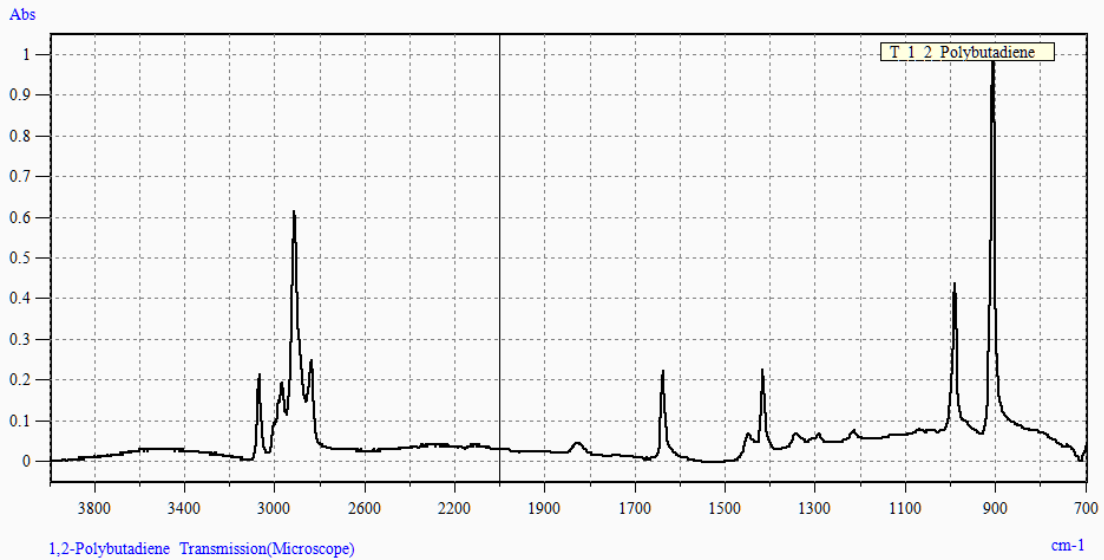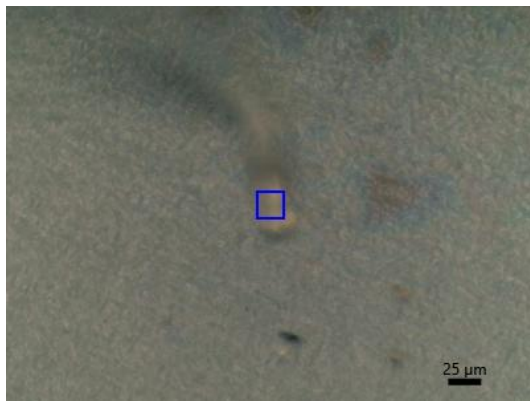

## Search Result Report

---

Filename : C:\Users\User\Desktop\UTSA samples\DR041120HM01\Point  
 Measurement\_fragment\_89.apit  
 Acquired Datetime : 2022/11/11 22:00:17

● **Search Parameters**

Library list :  
 IRs Polymer2  
 ATR-Polymer2  
 T-Polymer2  
 Maximum hits: 200  
 Minimum quality : 0  
 Algorithm : DiffDeriv

| Score | Library      | Name   | Comment                                   |
|-------|--------------|--------|-------------------------------------------|
| 615   | ATR-Polymer2 | D_PPS2 | Poly(Phenylene Sulfide)<br>DuraSamplIR-II |

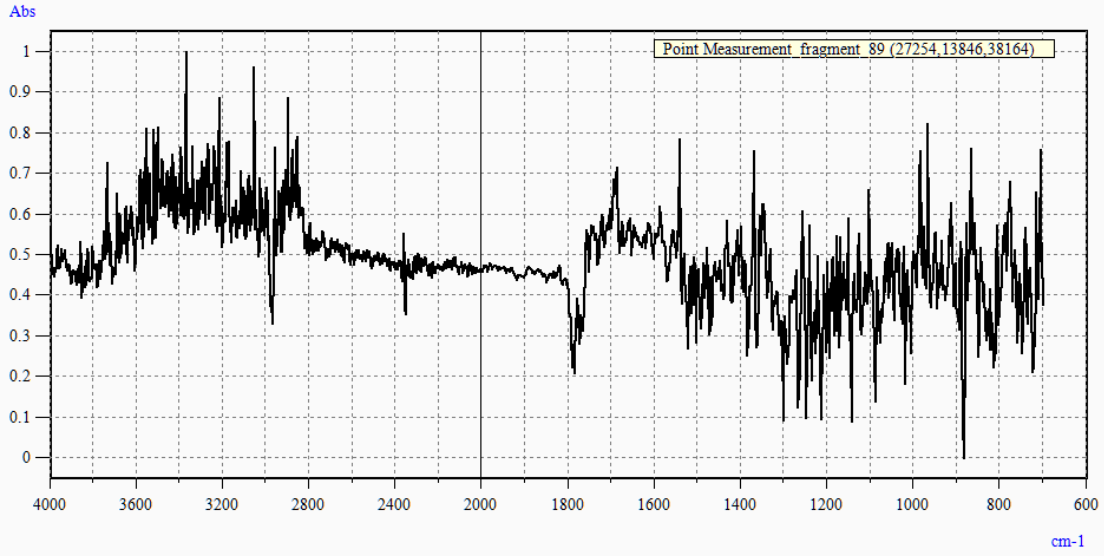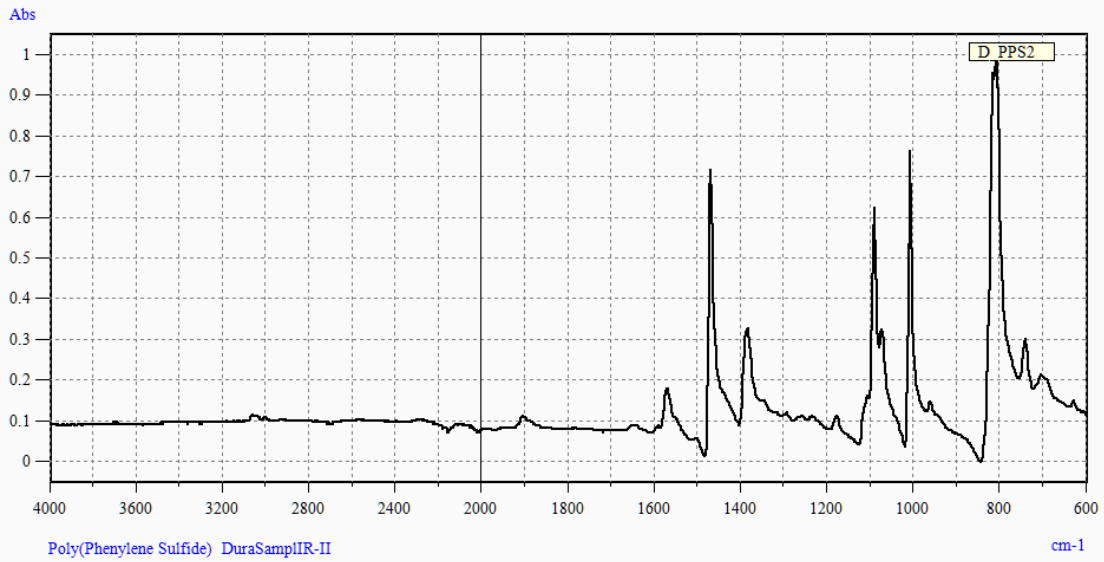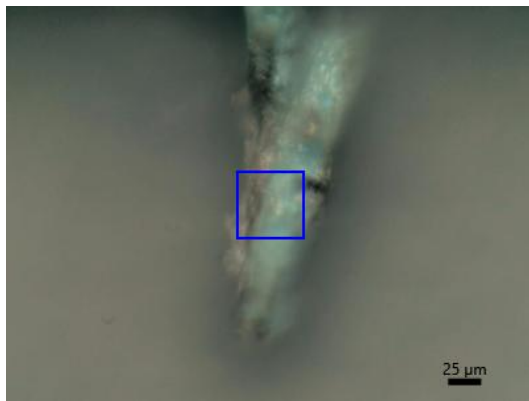

## Search Result Report

---

Filename : C:\Users\User\Desktop\UTSA samples\DR041120HM01\Point  
 Measurement\_fragment\_90.apit  
 Acquired Datetime : 2022/11/11 22:03:09

● **Search Parameters**

Library list :  
 IRs Polymer2  
 ATR-Polymer2  
 T-Polymer2  
 Maximum hits: 200  
 Minimum quality : 0  
 Algorithm : DiffDeriv

| Score | Library    | Name   | Comment                                 |
|-------|------------|--------|-----------------------------------------|
| 587   | T-Polymer2 | Epoxy7 | Epoxy Resin<br>Transmission(Microscope) |

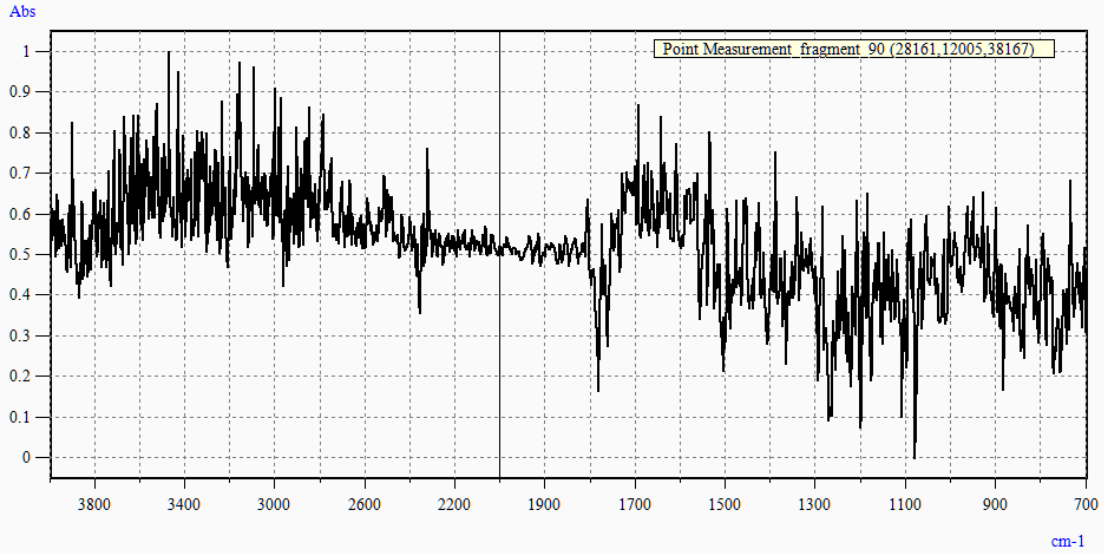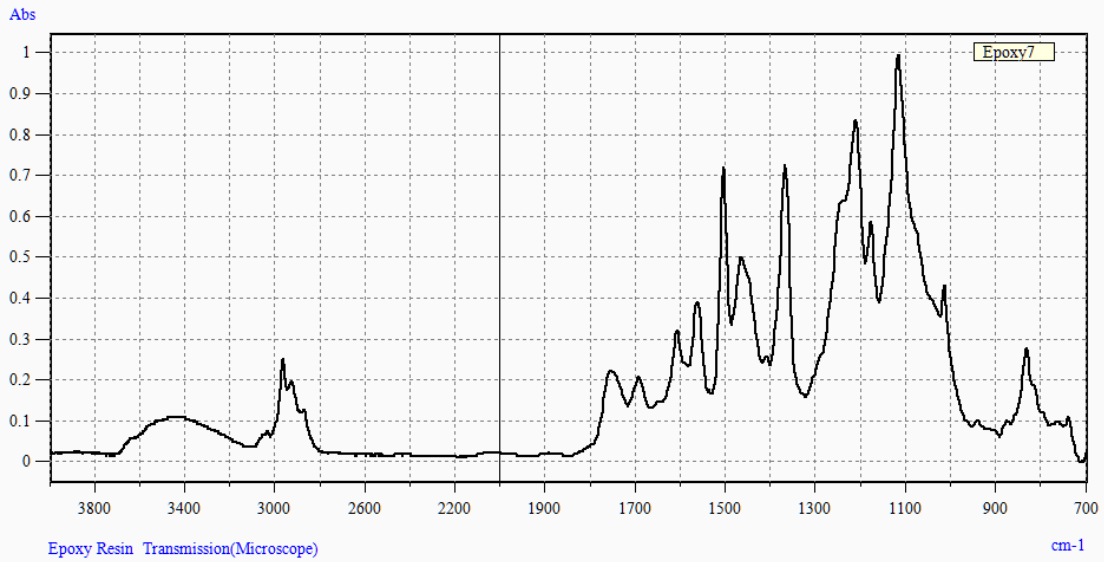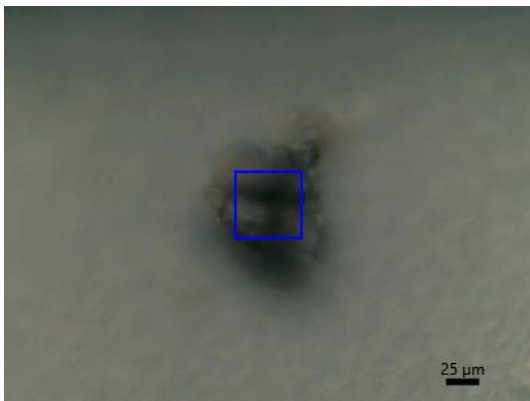

## Search Result Report

Filename : C:\Users\User\Desktop\UTSA samples\DR041120HM01\Point  
 Measurement\_fragment\_91.apit  
 Acquired Datetime : 2022/11/11 22:09:43

### ● Search Parameters

Library list :  
 IRs Polymer2  
 ATR-Polymer2  
 T-Polymer2  
 Maximum hits: 200  
 Minimum quality : 0  
 Algorithm : DiffDeriv

| Score | Library      | Name         | Comment                                                          |
|-------|--------------|--------------|------------------------------------------------------------------|
| 588   | ATR-Polymer2 | D_Polyester4 | Polyester Film(TOYOBO ESTER FILM & ESPET FILM)<br>DuraSamplIR-II |

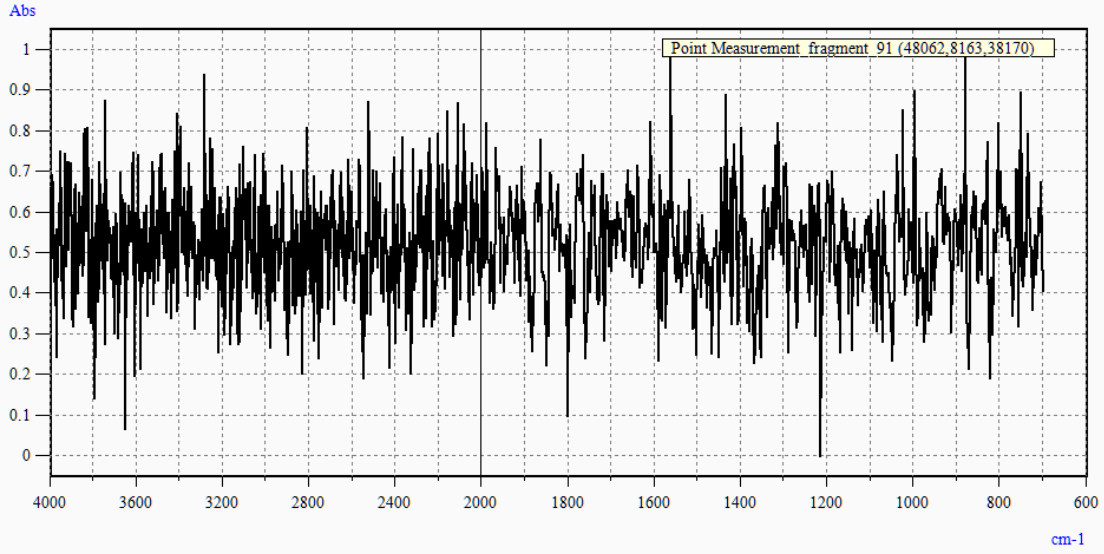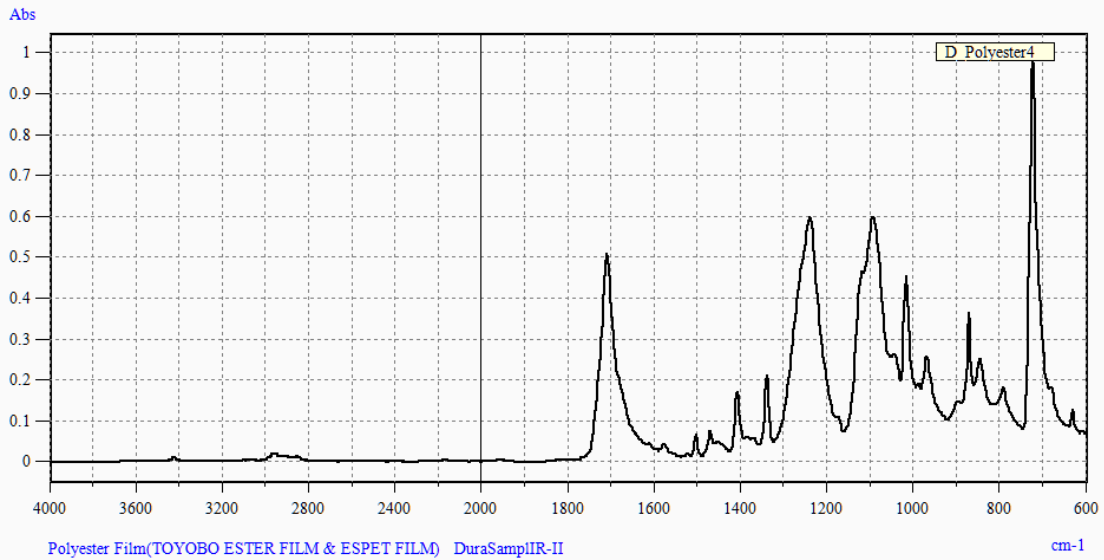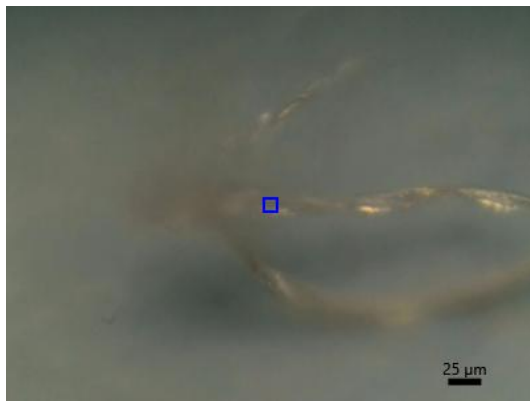

## Search Result Report

---

Filename : C:\Users\User\Desktop\UTSA samples\DR041120HM01\Point  
 Measurement\_fragment\_92.apit  
 Acquired Datetime : 2022/11/11 22:16:34

● **Search Parameters**

Library list :  
 IRs Polymer2  
 ATR-Polymer2  
 T-Polymer2  
 Maximum hits: 200  
 Minimum quality : 0  
 Algorithm : DiffDeriv

| Score | Library    | Name | Comment                                       |
|-------|------------|------|-----------------------------------------------|
| 651   | T-Polymer2 | PC   | Polycarbonate(PC)<br>Transmission(Microscope) |

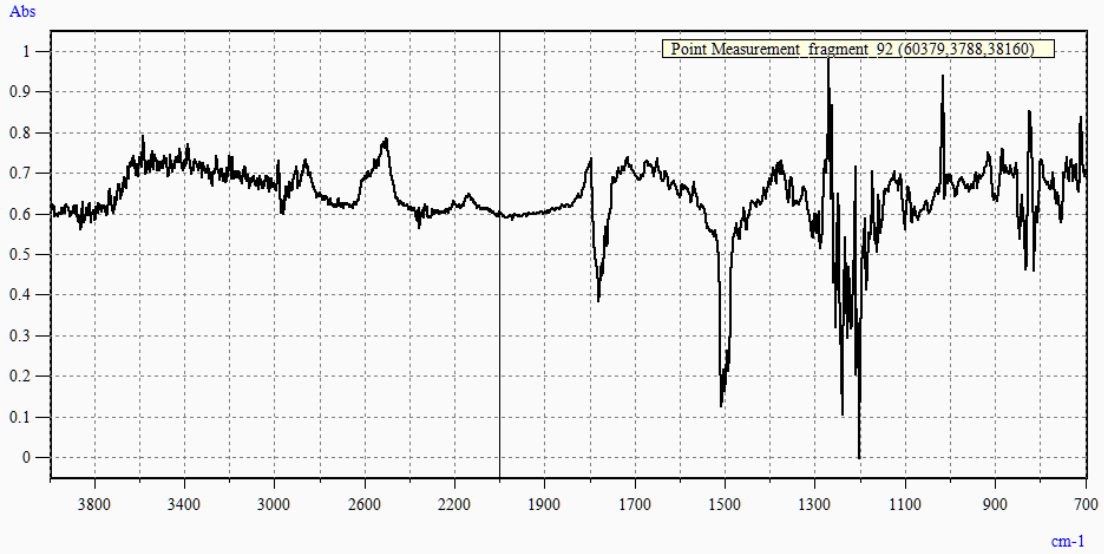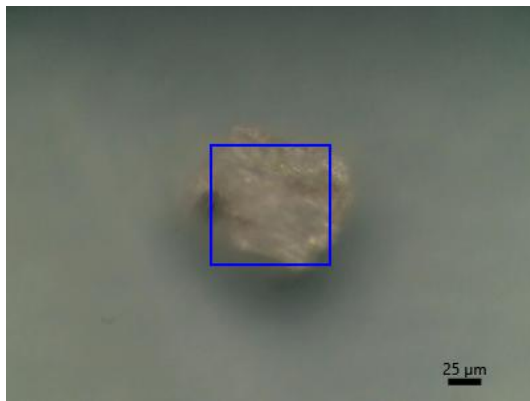

## Search Result Report

---

Filename : C:\Users\User\Desktop\UTSA samples\DR041120HR01\Point  
 Measurement\_Fragment\_111222\_14.apit  
 Acquired Datetime : 2022/11/12 12:35:09

● **Search Parameters**

Library list :  
 IRs Polymer2  
 ATR-Polymer2  
 T-Polymer2  
 Maximum hits: 200  
 Minimum quality : 0  
 Algorithm : DiffDeriv

| Score | Library    | Name                | Comment                                       |
|-------|------------|---------------------|-----------------------------------------------|
| 587   | T-Polymer2 | T_1_2_Polybutadiene | 1,2-Polybutadiene<br>Transmission(Microscope) |

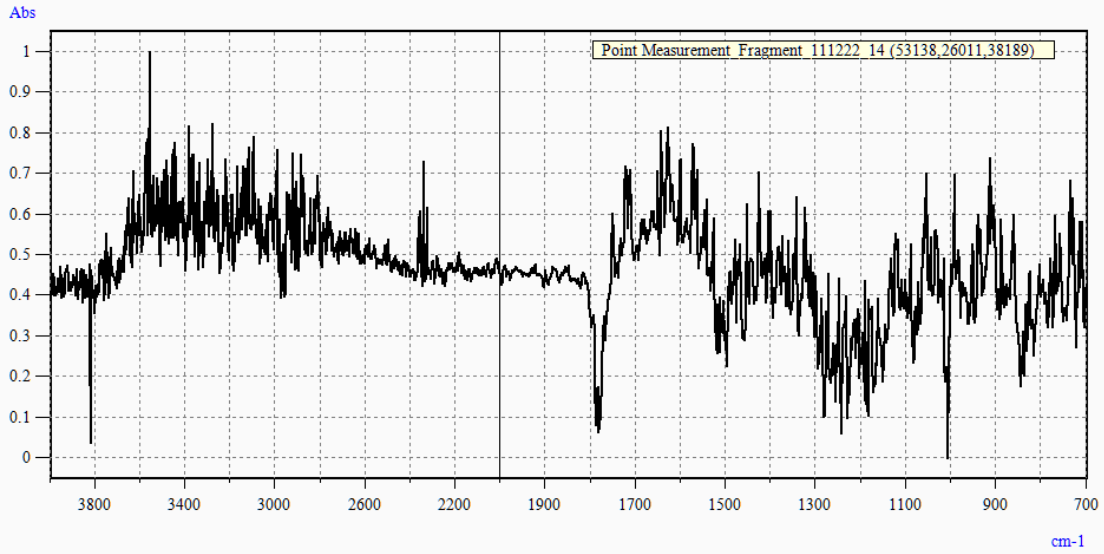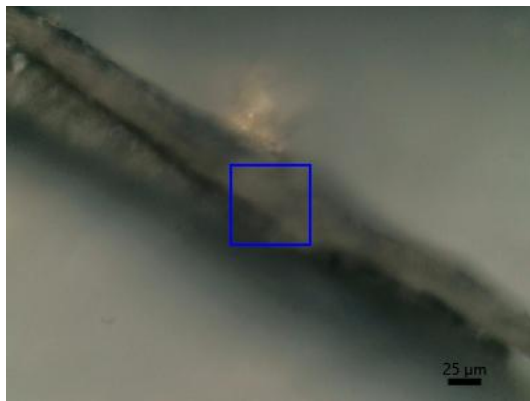

## Search Result Report

---

Filename : C:\Users\User\Desktop\UTSA samples\DR041120HR01\Point  
 Measurement\_Fragment\_111222\_15.apit  
 Acquired Datetime : 2022/11/12 12:39:50

● **Search Parameters**

Library list :  
 IRs Polymer2  
 ATR-Polymer2  
 T-Polymer2  
 Maximum hits: 200  
 Minimum quality : 0  
 Algorithm : DiffDeriv

| Score | Library      | Name | Comment                                      |
|-------|--------------|------|----------------------------------------------|
| 621   | IRs Polymer2 | PC   | Polycarbonate/CD-ROMATR/diamond ATRcorrected |

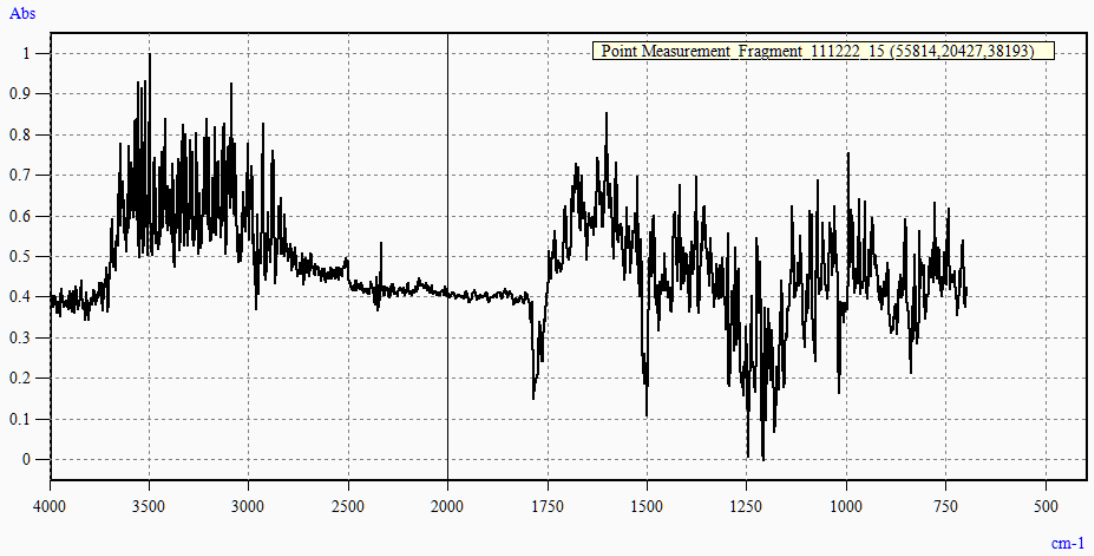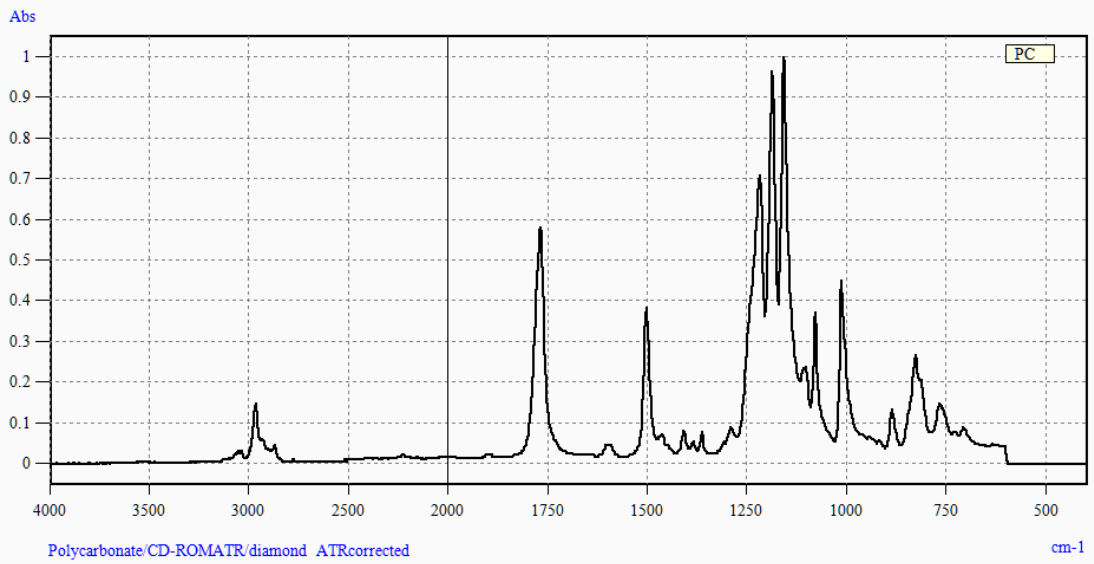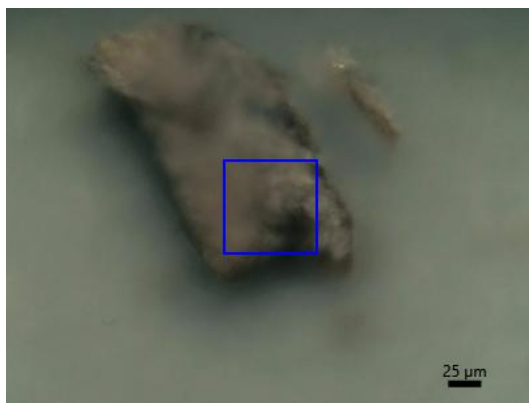

## Search Result Report

---

Filename : C:\Users\User\Desktop\UTSA samples\DR041120HR01\Point  
 Measurement\_Fragment\_111222\_16.apit  
 Acquired Datetime : 2022/11/12 12:46:29

● **Search Parameters**

Library list :  
 IRs : Polymer2  
 ATR-Polymer2  
 T-Polymer2  
 Maximum hits: 200  
 Minimum quality : 0  
 Algorithm : DiffDeriv

| Score | Library    | Name | Comment                                     |
|-------|------------|------|---------------------------------------------|
| 570   | T-Polymer2 | PS   | Polystyrene(PS)<br>Transmission(Microscope) |

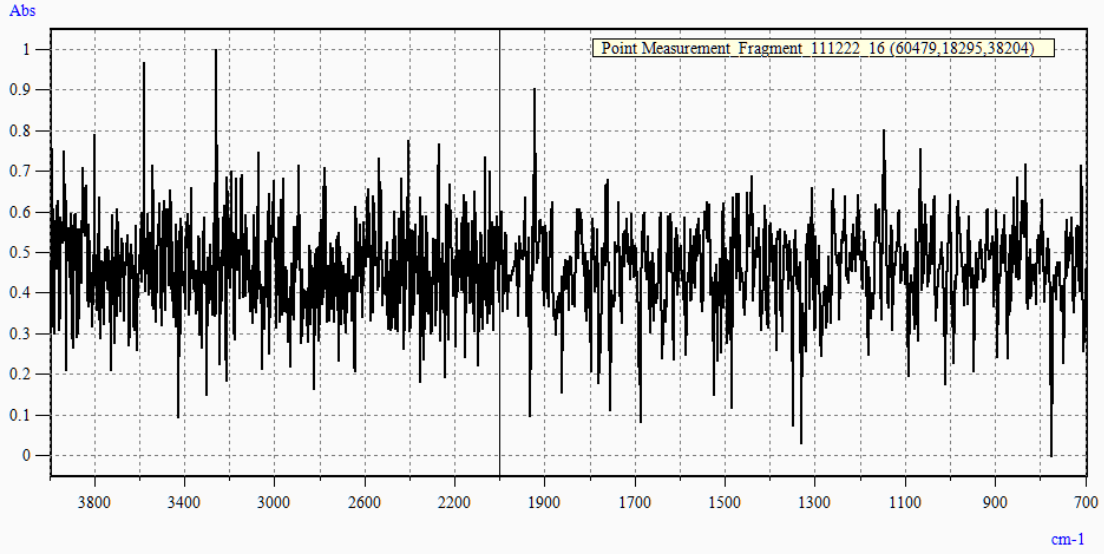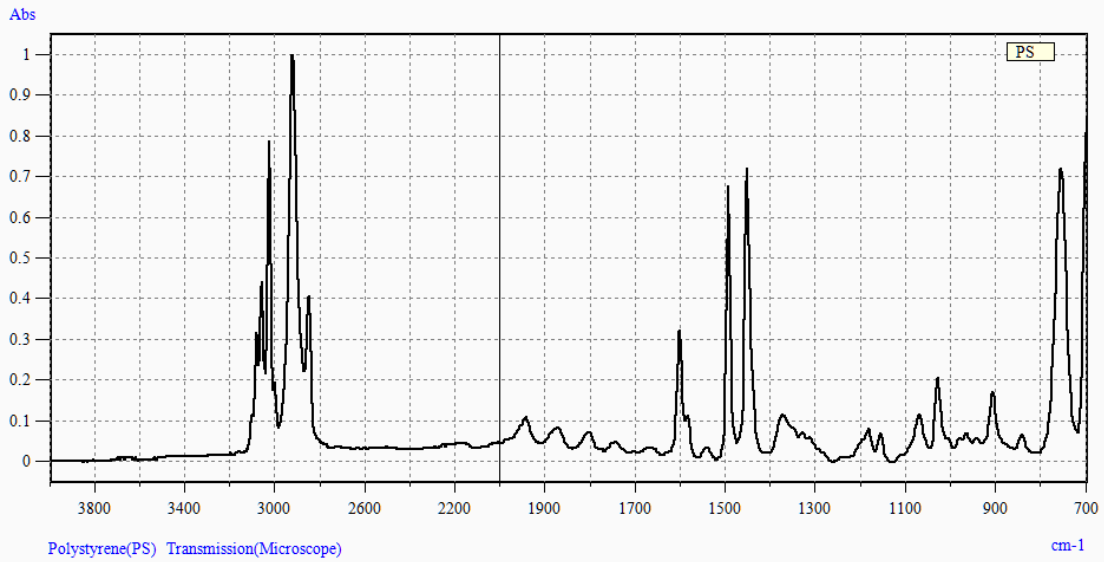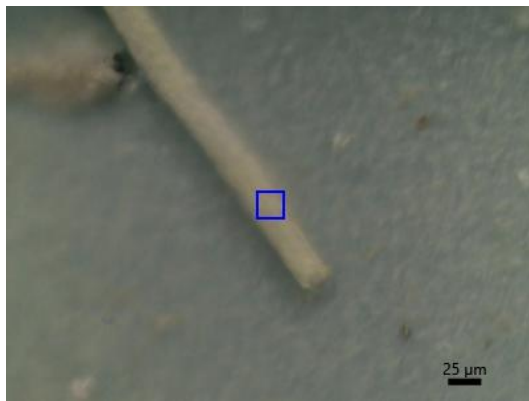

## Search Result Report

---

Filename : C:\Users\User\Desktop\UTSA samples\DR041120HR01\Point  
 Measurement\_Fragment\_111222\_17.apit  
 Acquired Datetime : 2022/11/12 12:54:56

● **Search Parameters**

Library list :  
 IRs : Polymer2  
 ATR-Polymer2  
 T-Polymer2  
 Maximum hits: 200  
 Minimum quality : 0  
 Algorithm : DiffDeriv

| Score | Library    | Name | Comment                                       |
|-------|------------|------|-----------------------------------------------|
| 632   | T-Polymer2 | PC   | Polycarbonate(PC)<br>Transmission(Microscope) |

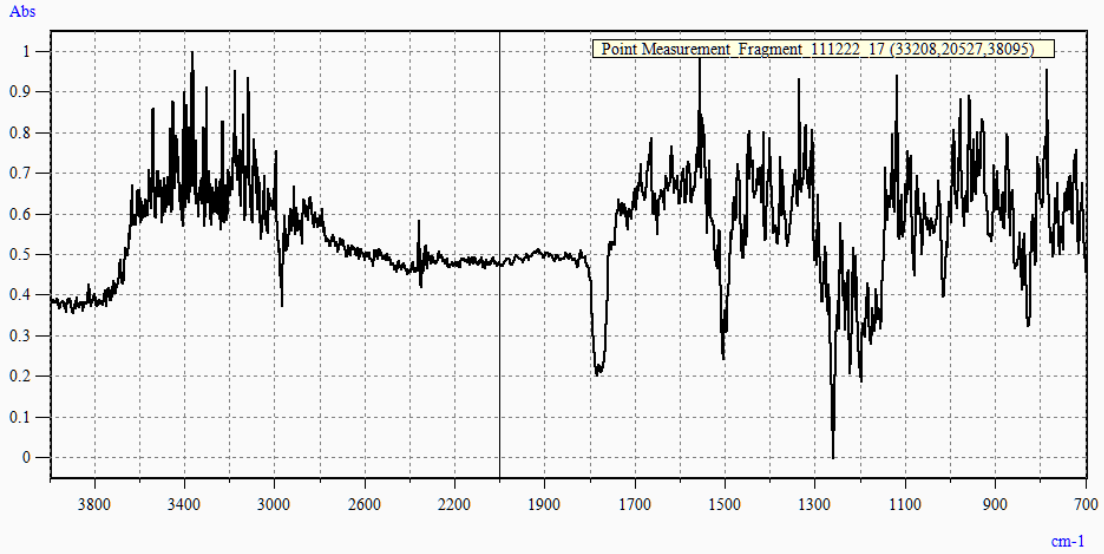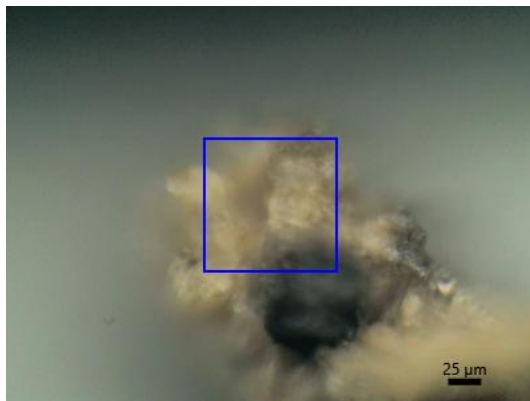

## Search Result Report

---

Filename : C:\Users\User\Desktop\UTSA samples\DR041120HR01\Point  
 Measurement\_Fragment\_111222\_18.apit  
 Acquired Datetime : 2022/11/12 13:05:41

● **Search Parameters**

Library list :  
 IRs : Polymer2  
 ATR-Polymer2  
 T-Polymer2  
 Maximum hits: 200  
 Minimum quality : 0  
 Algorithm : DiffDeriv

| Score | Library    | Name | Comment                                       |
|-------|------------|------|-----------------------------------------------|
| 729   | T-Polymer2 | PC   | Polycarbonate(PC)<br>Transmission(Microscope) |

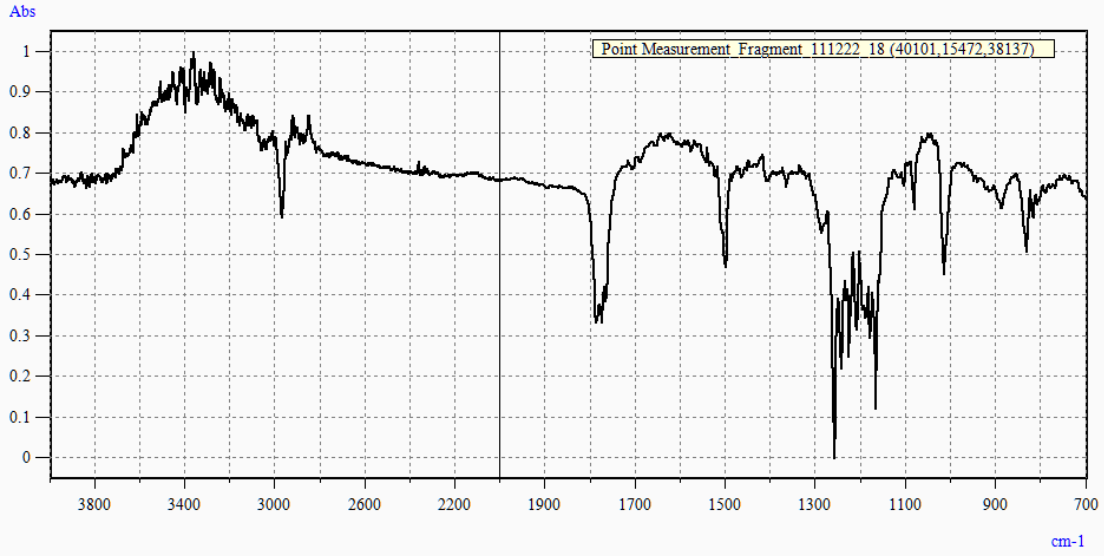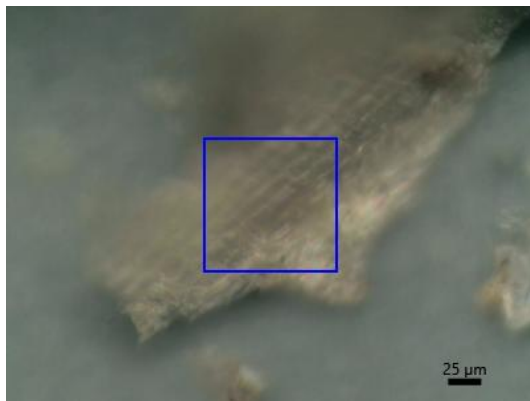

## Search Result Report

---

Filename : C:\Users\User\Desktop\UTSA samples\DR041120HR01\Point  
 Measurement\_Fragment\_111222\_19.apit  
 Acquired Datetime : 2022/11/12 13:12:57

● **Search Parameters**

Library list :  
 IRs : Polymer2  
 ATR-Polymer2  
 T-Polymer2  
 Maximum hits: 200  
 Minimum quality : 0  
 Algorithm : DiffDeriv

| Score | Library      | Name                | Comment                                |
|-------|--------------|---------------------|----------------------------------------|
| 591   | ATR-Polymer2 | D_PolyethyleneOxide | Poly(Ethylene Oxide)<br>DuraSamplIR-II |

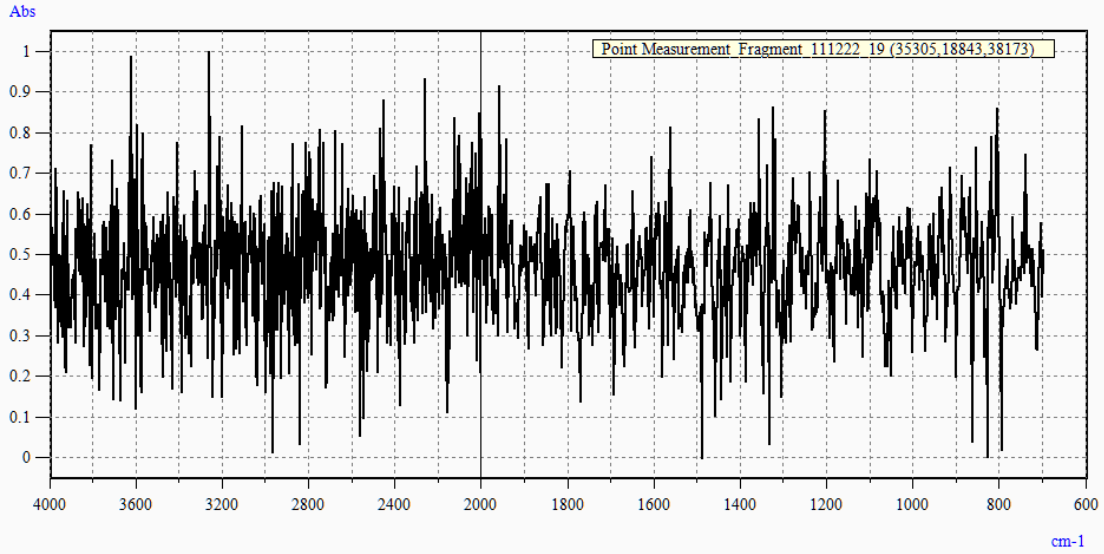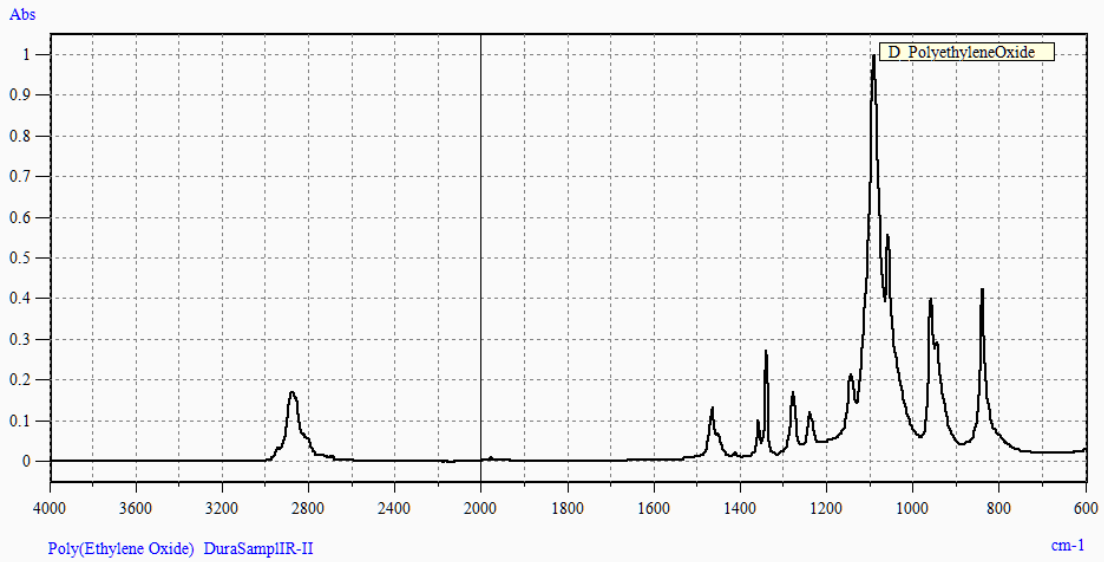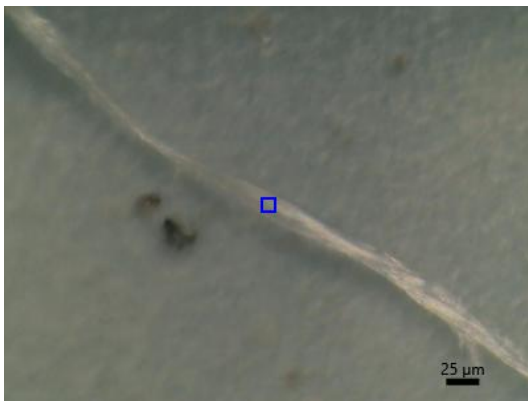

## Search Result Report

---

Filename : C:\Users\User\Desktop\UTSA samples\DR041120HR01\Point  
 Measurement\_Fragment\_111222\_20.apit  
 Acquired Datetime : 2022/11/12 13:28:36

● **Search Parameters**

Library list :  
 IRs : Polymer2  
 ATR-Polymer2  
 T-Polymer2  
 Maximum hits: 200  
 Minimum quality : 0  
 Algorithm : DiffDeriv

| Score | Library    | Name | Comment                                       |
|-------|------------|------|-----------------------------------------------|
| 703   | T-Polymer2 | PC   | Polycarbonate(PC)<br>Transmission(Microscope) |

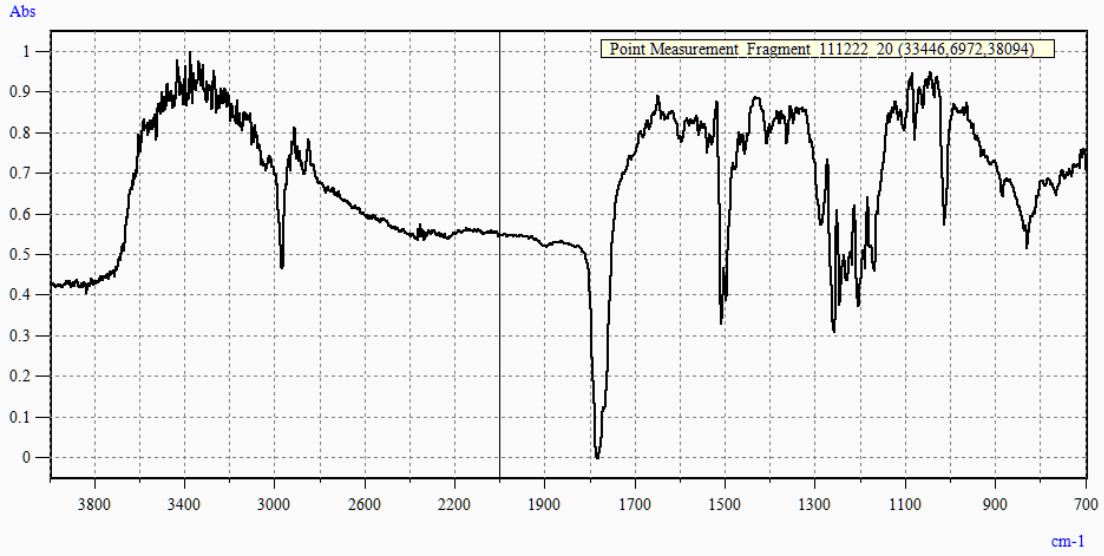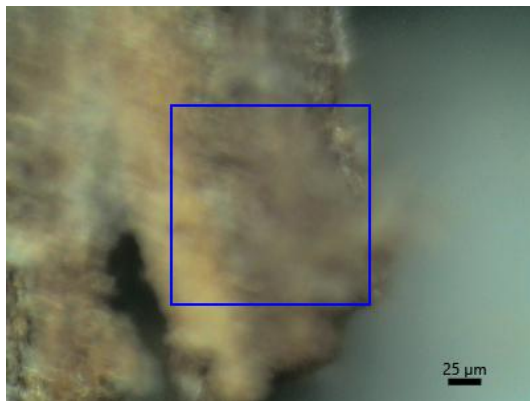

## Search Result Report

---

Filename : C:\Users\User\Desktop\UTSA samples\DR041120HR01\Point  
 Measurement\_Fragment\_111222\_21.apit  
 Acquired Datetime : 2022/11/12 13:31:27

● **Search Parameters**

Library list :  
 IRs Polymer2  
 ATR-Polymer2  
 T-Polymer2  
 Maximum hits: 200  
 Minimum quality : 0  
 Algorithm : DiffDeriv

| Score | Library    | Name  | Comment                                       |
|-------|------------|-------|-----------------------------------------------|
| 656   | T-Polymer2 | T_PC2 | Polycarbonate(PC)<br>Transmission(Microscope) |

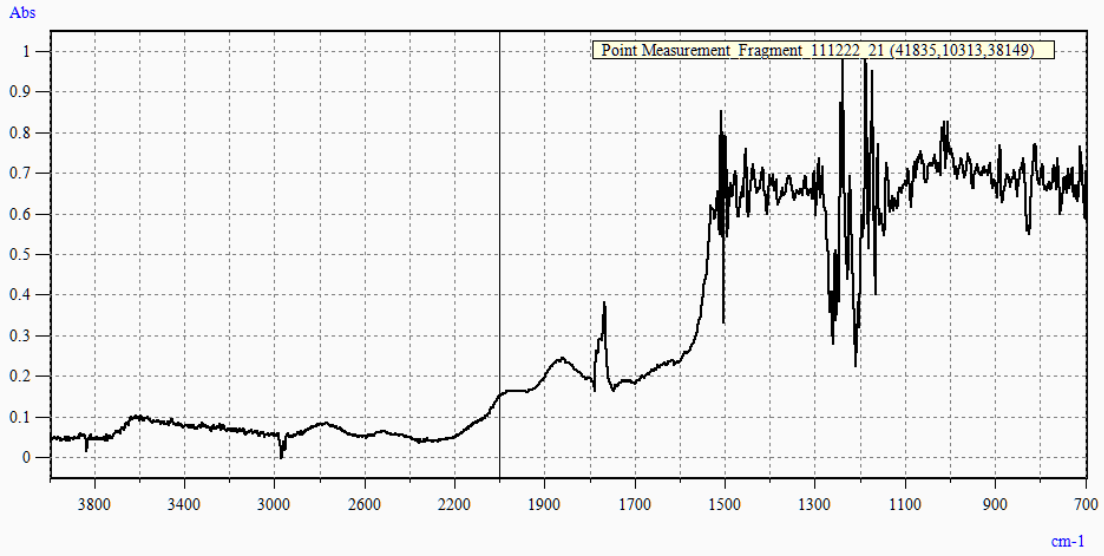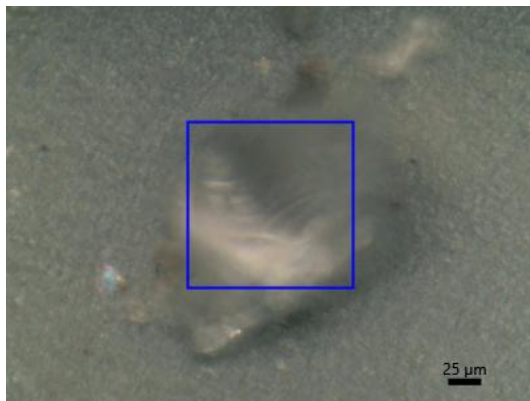

## Search Result Report

---

Filename : C:\Users\User\Desktop\UTSA samples\DR041120HR01\Point  
 Measurement\_Fragment\_111222\_22.apit  
 Acquired Datetime : 2022/11/12 13:34:15

### ● Search Parameters

Library list :  
 IRs Polymer2  
 ATR-Polymer2  
 T-Polymer2  
 Maximum hits: 200  
 Minimum quality : 0  
 Algorithm : DiffDeriv

| Score | Library    | Name | Comment                                       |
|-------|------------|------|-----------------------------------------------|
| 666   | T-Polymer2 | PC   | Polycarbonate(PC)<br>Transmission(Microscope) |

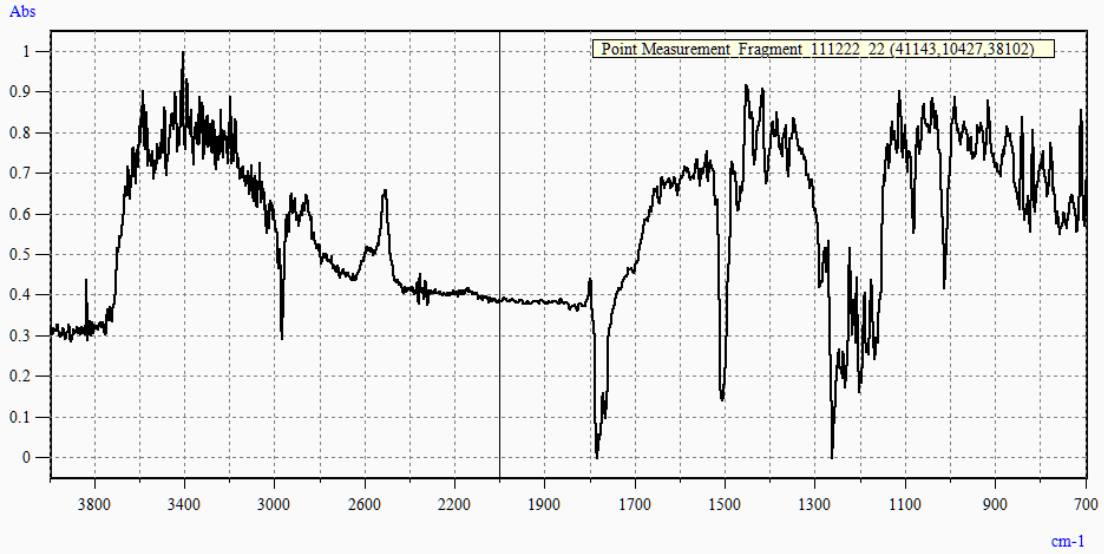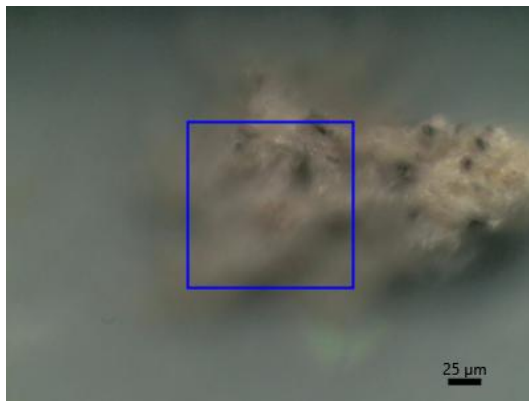

## Search Result Report

---

Filename : C:\Users\User\Desktop\UTSA samples\DR041120HR01\Point  
 Measurement\_Fragment\_111222\_23.apit  
 Acquired Datetime : 2022/11/12 13:36:52

● **Search Parameters**

Library list :  
 IRs Polymer2  
 ATR-Polymer2  
 T-Polymer2  
 Maximum hits: 200  
 Minimum quality : 0  
 Algorithm : DiffDeriv

| Score | Library      | Name | Comment                             |
|-------|--------------|------|-------------------------------------|
| 603   | ATR-Polymer2 | D_PC | Polycarbonate(PC)<br>DuraSamplIR-II |

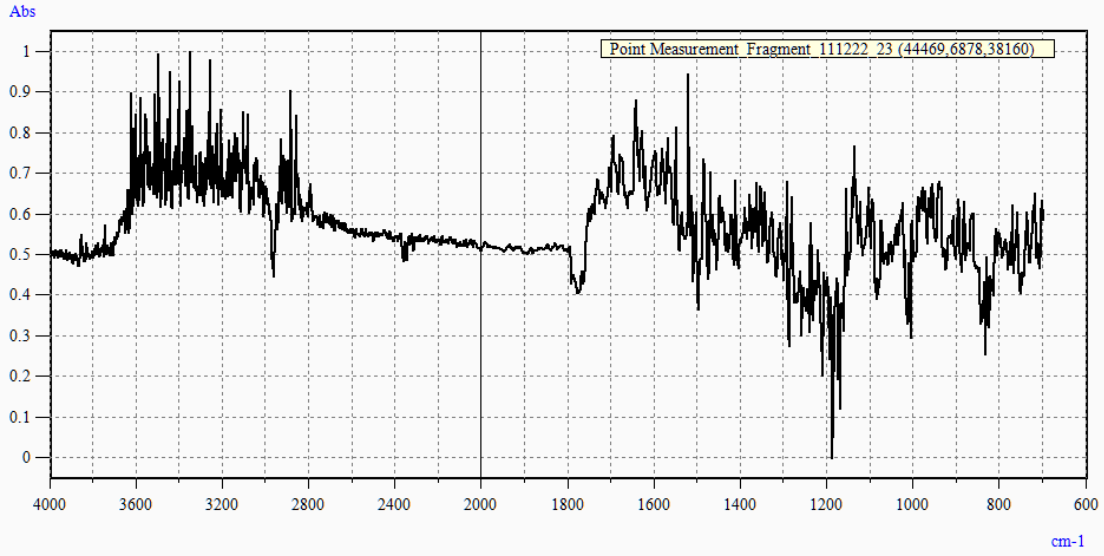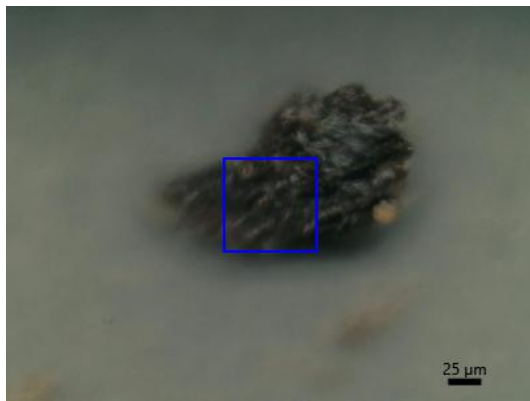

## Search Result Report

---

Filename : C:\Users\User\Desktop\UTSA samples\DR041120HR01\Point  
 Measurement\_Fragment\_111222\_24.apit  
 Acquired Datetime : 2022/11/12 13:39:44

● **Search Parameters**

Library list :  
 IRs Polymer2  
 ATR-Polymer2  
 T-Polymer2  
 Maximum hits: 200  
 Minimum quality : 0  
 Algorithm : DiffDeriv

| Score | Library    | Name  | Comment                                       |
|-------|------------|-------|-----------------------------------------------|
| 615   | T-Polymer2 | T_PC2 | Polycarbonate(PC)<br>Transmission(Microscope) |

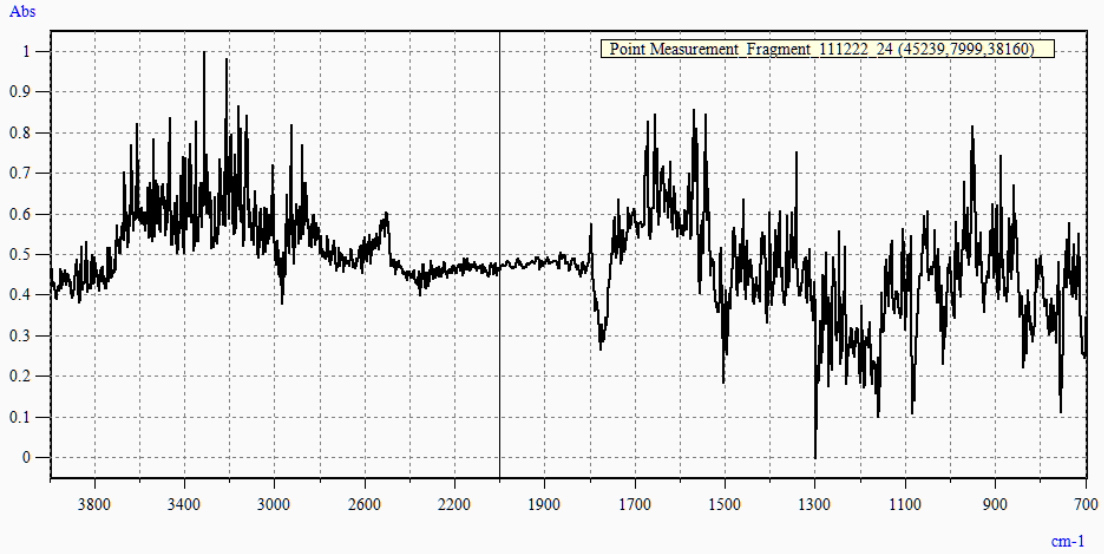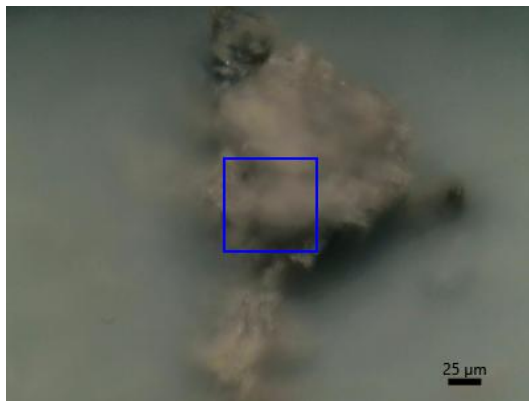

## Search Result Report

---

Filename : C:\Users\User\Desktop\UTSA samples\DR041120HR01\Point  
 Measurement\_Fragment\_111222\_25.apit  
 Acquired Datetime : 2022/11/12 14:04:13

● **Search Parameters**

Library list :  
 IRs Polymer2  
 ATR-Polymer2  
 T-Polymer2  
 Maximum hits: 200  
 Minimum quality : 0  
 Algorithm : DiffDeriv

| Score | Library      | Name | Comment                             |
|-------|--------------|------|-------------------------------------|
| 647   | ATR-Polymer2 | D_PC | Polycarbonate(PC)<br>DuraSamplIR-II |

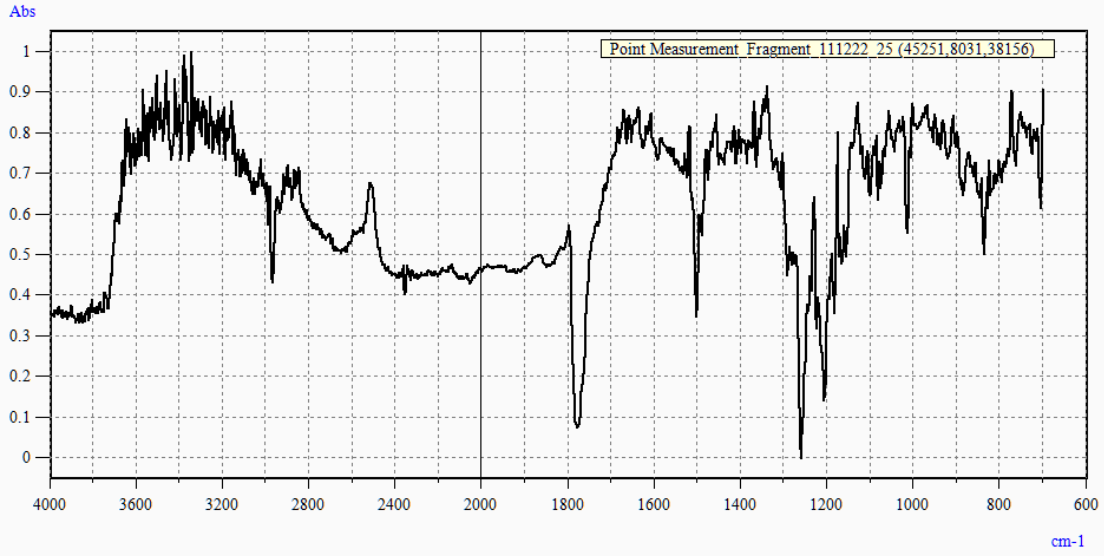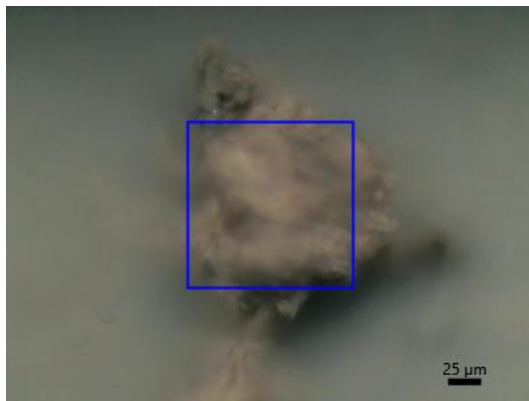

## Search Result Report

---

Filename : C:\Users\User\Desktop\UTSA samples\DR041120HR01\Point  
 Measurement\_Fragment\_111222\_26.apit  
 Acquired Datetime : 2022/11/12 14:08:13

### ● Search Parameters

Library list :  
 IRs Polymer2  
 ATR-Polymer2  
 T-Polymer2  
 Maximum hits: 200  
 Minimum quality : 0  
 Algorithm : DiffDeriv

| Score | Library    | Name  | Comment                        |
|-------|------------|-------|--------------------------------|
| 658   | T-Polymer2 | Paper | Paper Transmission(Microscope) |

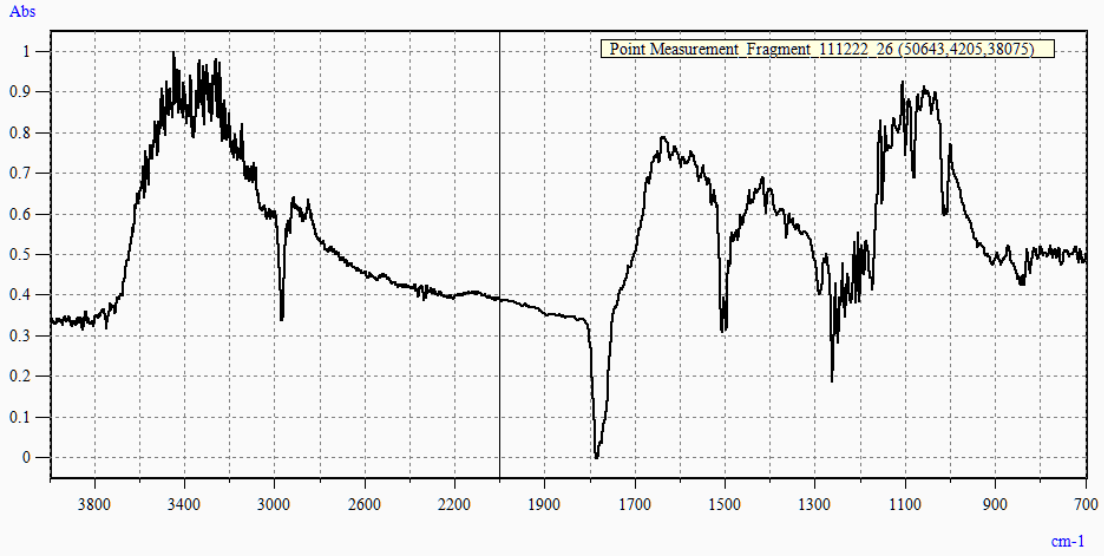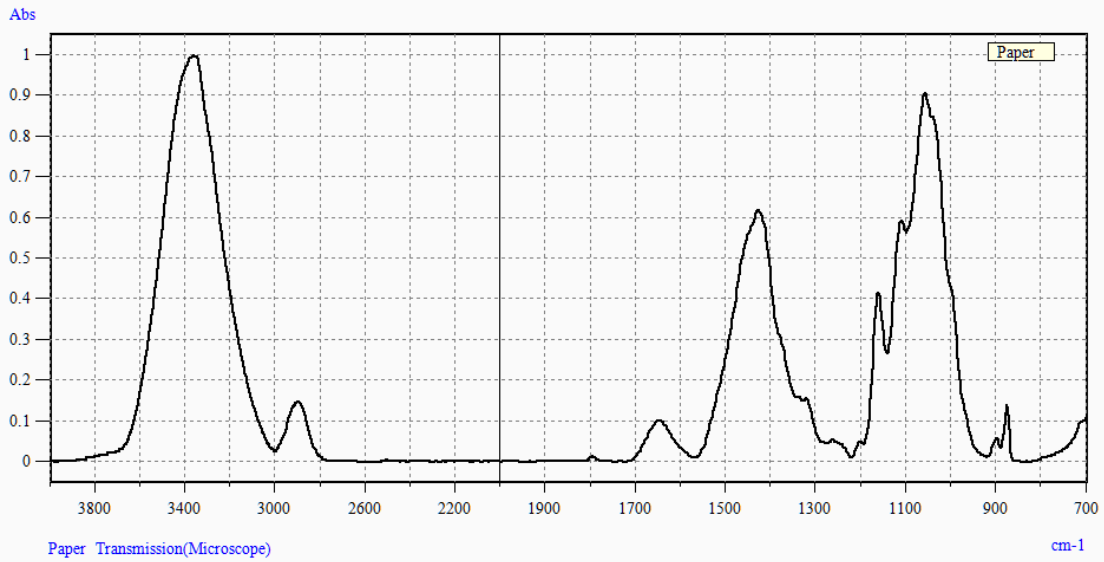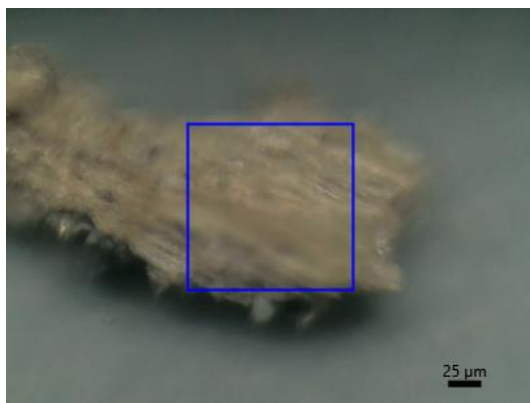

## Search Result Report

---

Filename : C:\Users\User\Desktop\UTSA samples\DR041120HR01\Point  
 Measurement\_Fragment\_111222\_27.apit  
 Acquired Datetime : 2022/11/12 14:13:07

### ● Search Parameters

Library list :  
 IRs Polymer2  
 ATR-Polymer2  
 T-Polymer2  
 Maximum hits: 200  
 Minimum quality : 0  
 Algorithm : DiffDeriv

| Score | Library    | Name | Comment                                       |
|-------|------------|------|-----------------------------------------------|
| 618   | T-Polymer2 | PC   | Polycarbonate(PC)<br>Transmission(Microscope) |

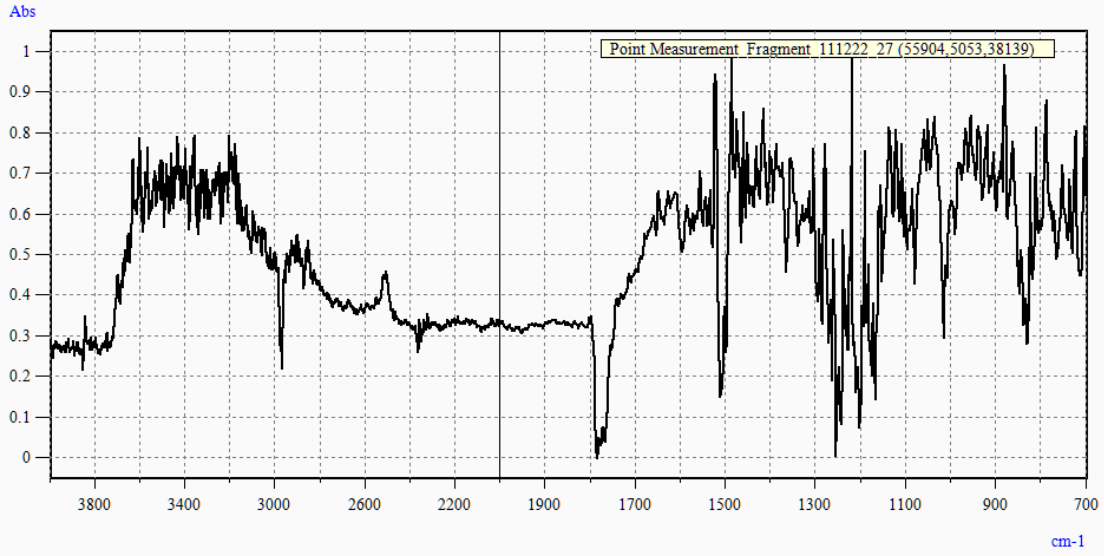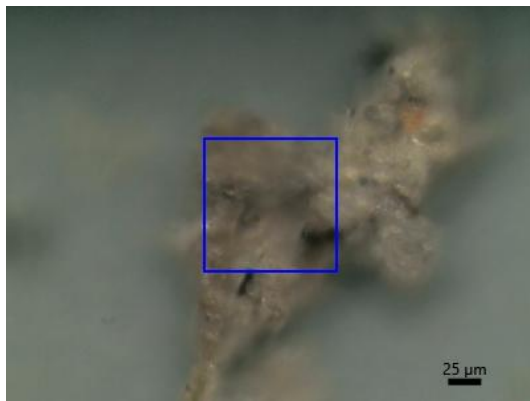

## Search Result Report

---

Filename : C:\Users\User\Desktop\UTSA samples\DR041120HR01\Point  
 Measurement\_Fragment\_111222\_28.apit  
 Acquired Datetime : 2022/11/12 14:15:21

### ● Search Parameters

Library list :  
 IRs Polymer2  
 ATR-Polymer2  
 T-Polymer2  
 Maximum hits: 200  
 Minimum quality : 0  
 Algorithm : DiffDeriv

| Score | Library      | Name         | Comment              |
|-------|--------------|--------------|----------------------|
| 602   | ATR-Polymer2 | D_Cellulose5 | Ramie DuraSamplIR-II |

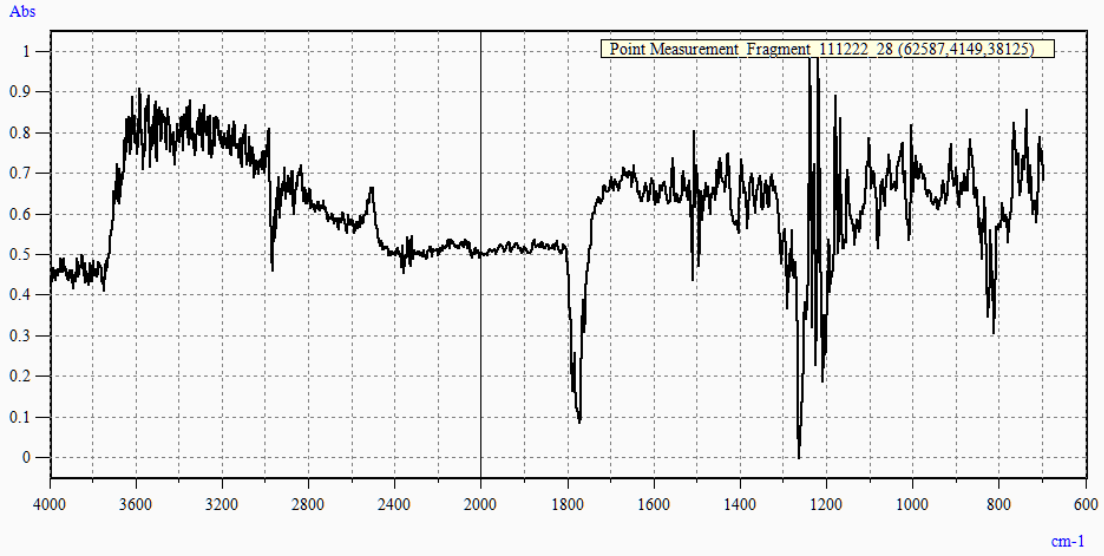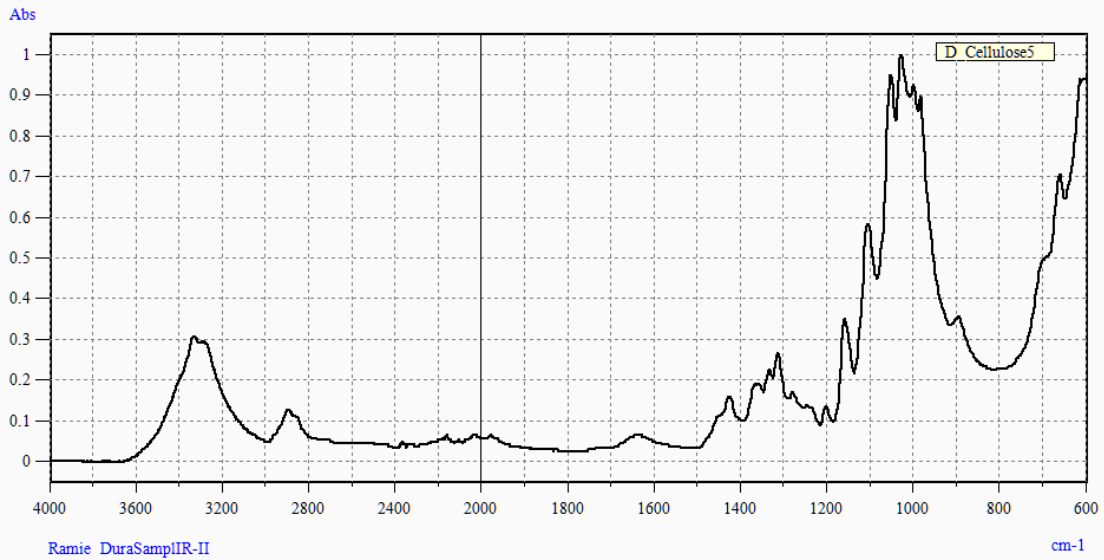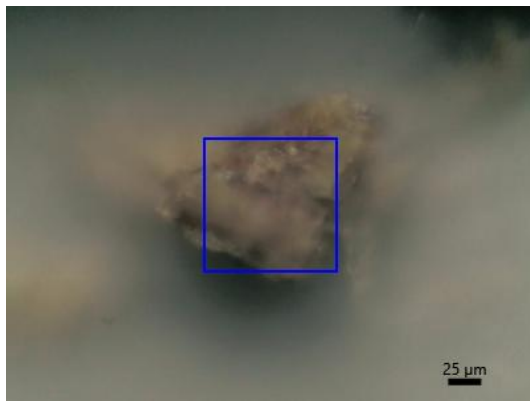

## Search Result Report

---

Filename : C:\Users\User\Desktop\UTSA samples\DR041120HR01\Point  
 Measurement\_Fragment\_111222\_29.apit  
 Acquired Datetime : 2022/11/12 14:20:00

### ● Search Parameters

Library list :  
 IRs Polymer2  
 ATR-Polymer2  
 T-Polymer2  
 Maximum hits: 200  
 Minimum quality : 0  
 Algorithm : DiffDeriv

| Score | Library      | Name   | Comment                                   |
|-------|--------------|--------|-------------------------------------------|
| 583   | ATR-Polymer2 | D_PPS2 | Poly(Phenylene Sulfide)<br>DuraSamplIR-II |

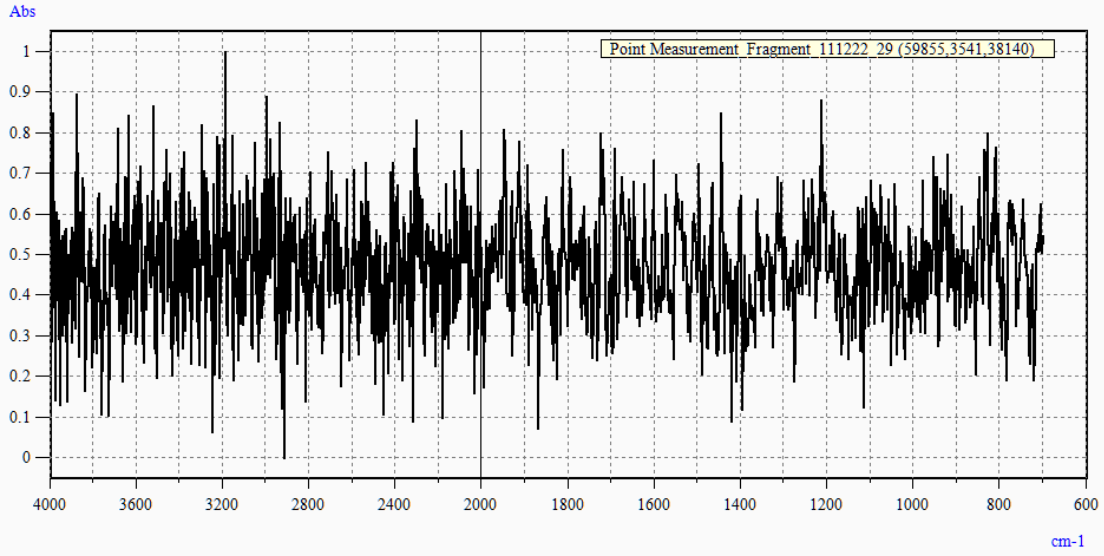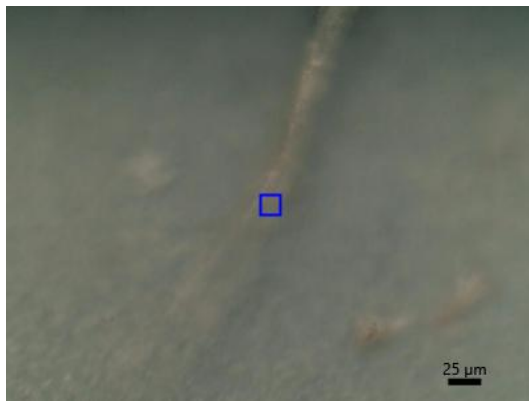

## Search Result Report

---

Filename : C:\Users\User\Desktop\UTSA samples\DR041120HR01\Point  
 Measurement\_White\_Fiber\_111222\_24.apit  
 Acquired Datetime : 2022/11/12 13:47:43

● **Search Parameters**

Library list :  
 IRs Polymer2  
 ATR-Polymer2  
 T-Polymer2  
 Maximum hits: 200  
 Minimum quality : 0  
 Algorithm : DiffDeriv

| Score | Library    | Name             | Comment                                      |
|-------|------------|------------------|----------------------------------------------|
| 578   | T-Polymer2 | Acrylic Adhesive | Acrylic Adhesive<br>Transmission(Microscope) |

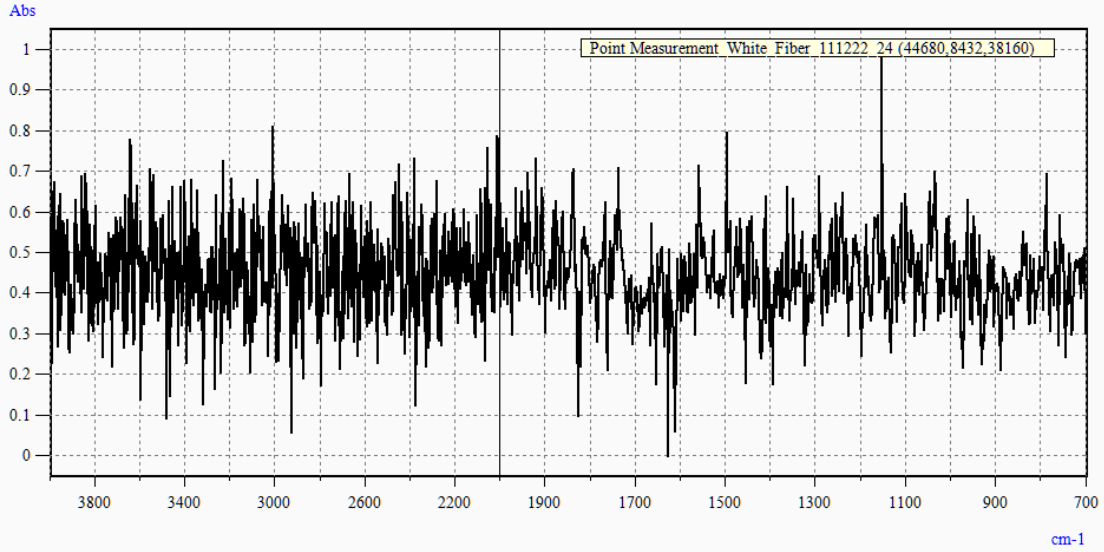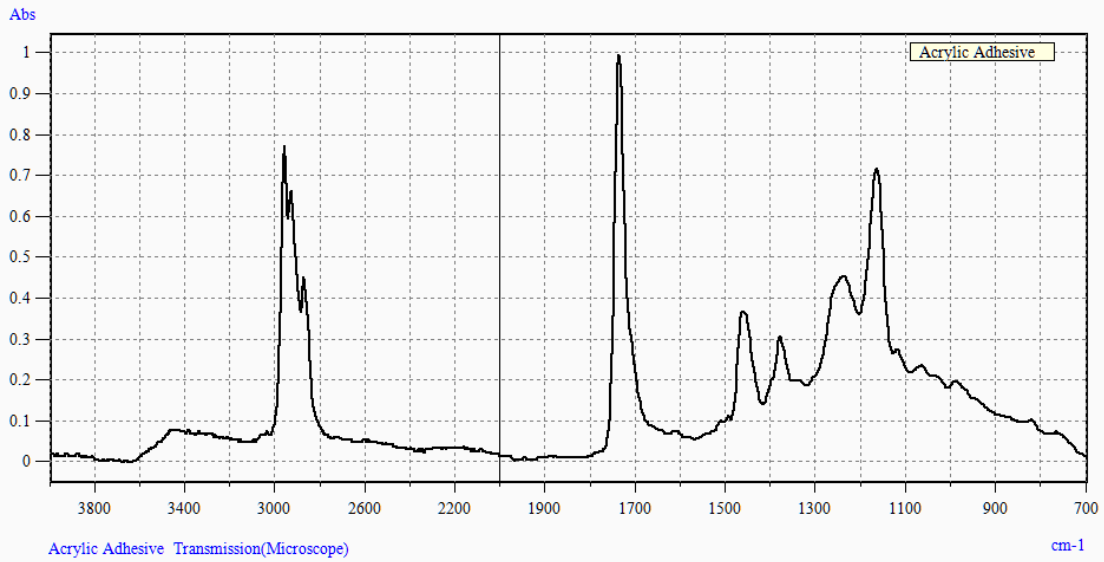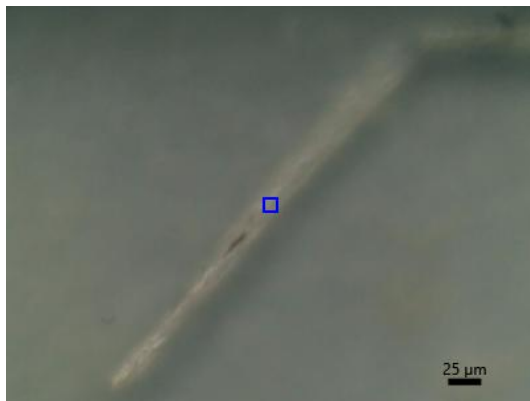

## Search Result Report

---

Filename : C:\Users\User\Desktop\UTSA samples\DR041120HR01\Point  
 Measurement\_White\_Fiber\_111222\_25.apit  
 Acquired Datetime : 2022/11/12 13:57:40

● **Search Parameters**

Library list :  
 IRs Polymer2  
 ATR-Polymer2  
 T-Polymer2  
 Maximum hits: 200  
 Minimum quality : 0  
 Algorithm : DiffDeriv

| Score | Library      | Name | Comment                      |
|-------|--------------|------|------------------------------|
| 593   | IRs Polymer2 | BR3  | Polybutadiene High-transFilm |

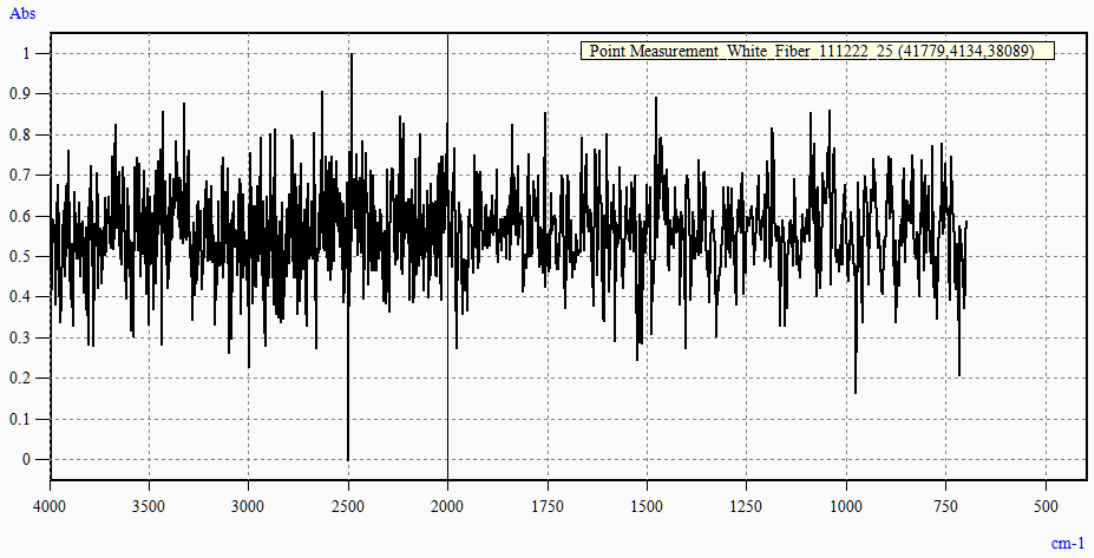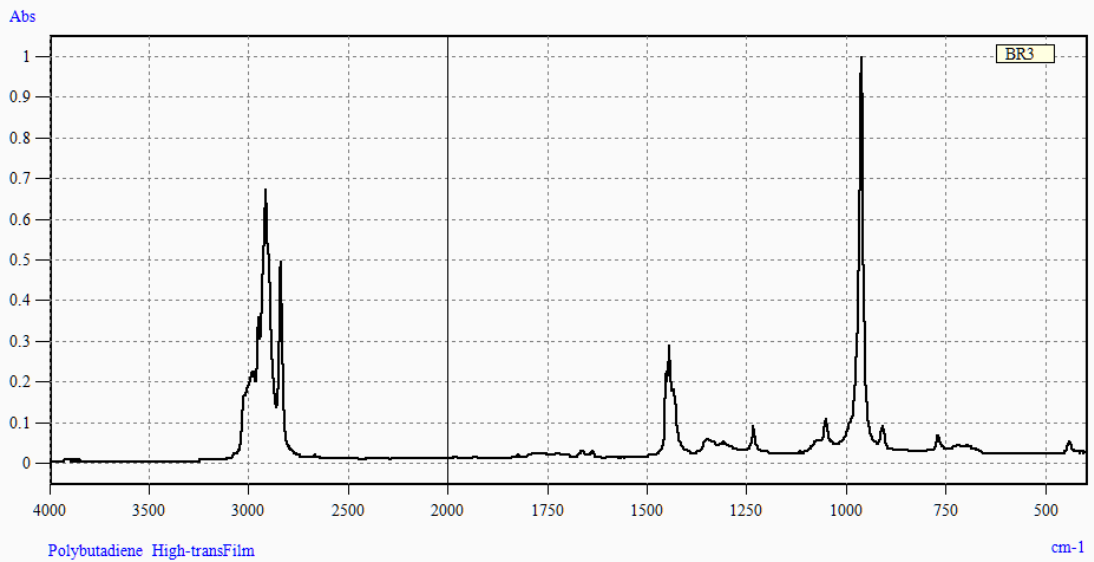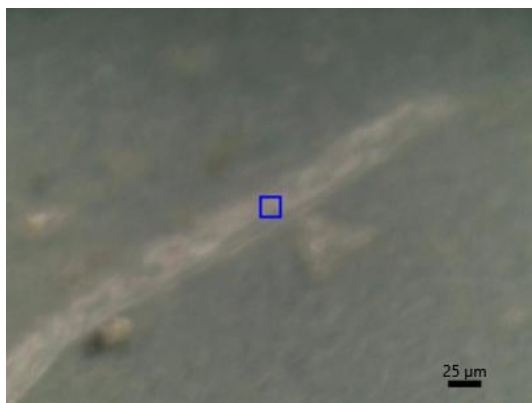

## Search Result Report

---

Filename : C:\Users\User\Desktop\UTSA samples\DR041120HR01\Point  
 Measurement\_White\_Fiber\_111222\_29.apit  
 Acquired Datetime : 2022/11/12 14:22:56

### ● Search Parameters

Library list :  
 IRs Polymer2  
 ATR-Polymer2  
 T-Polymer2  
 Maximum hits: 200  
 Minimum quality : 0  
 Algorithm : DiffDeriv

| Score | Library    | Name | Comment                                       |
|-------|------------|------|-----------------------------------------------|
| 589   | T-Polymer2 | PP   | Polypropylene(PP)<br>Transmission(Microscope) |

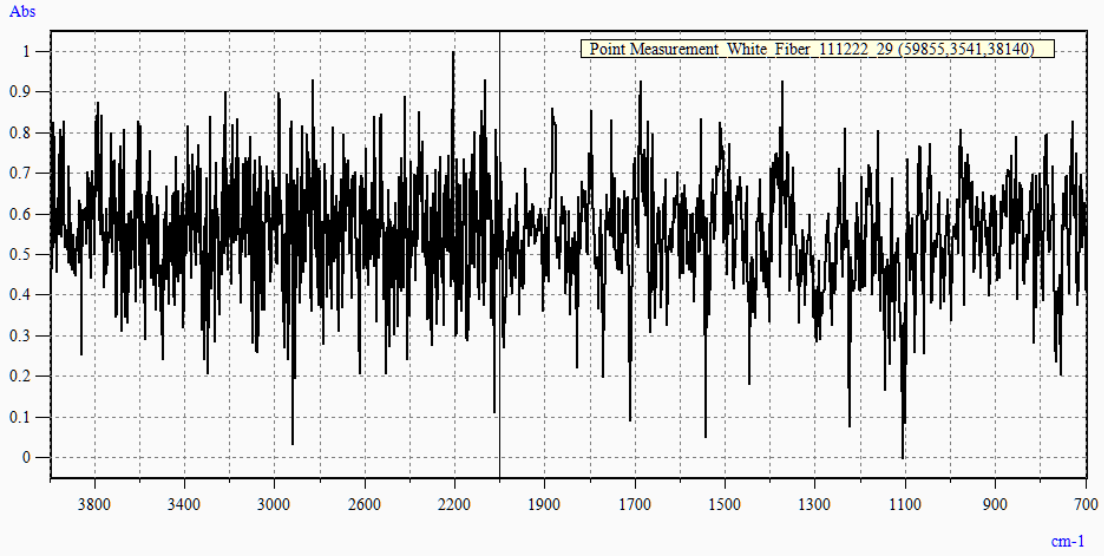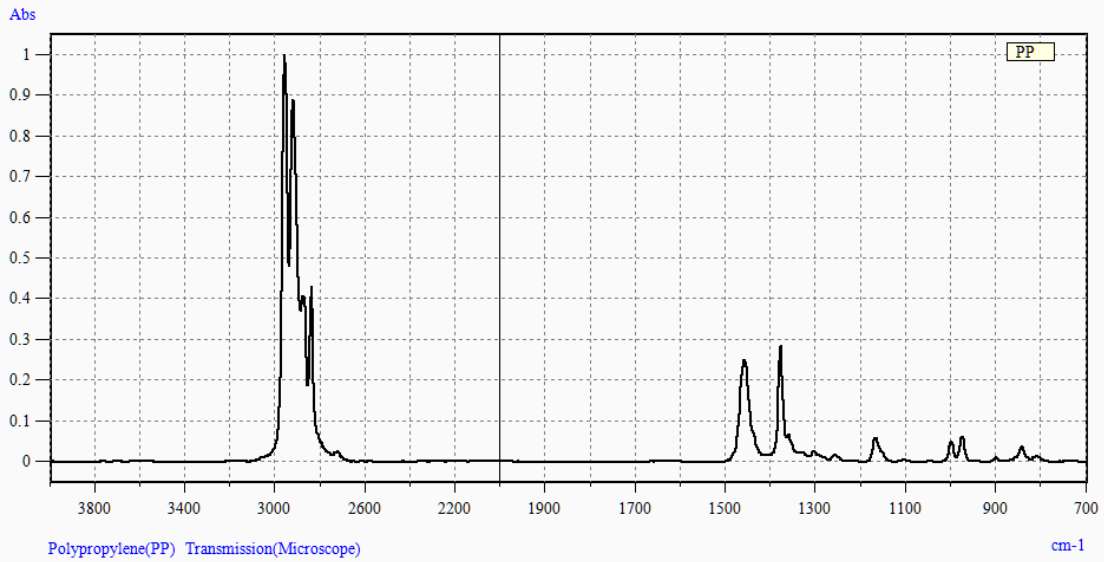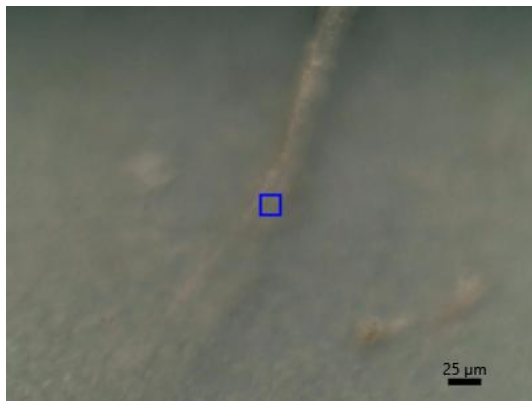

## Search Result Report

---

Filename : C:\Users\User\Desktop\UTSA samples\DR041120HT03\Point  
 Measurement\_fragment\_70.apit  
 Acquired Datetime : 2022/11/11 19:00:34

● **Search Parameters**

Library list :  
 IRs Polymer2  
 ATR-Polymer2  
 T-Polymer2  
 Maximum hits: 200  
 Minimum quality : 0  
 Algorithm : DiffDeriv

| Score | Library    | Name            | Comment                                              |
|-------|------------|-----------------|------------------------------------------------------|
| 768   | T-Polymer2 | Soy Bean Powder | Protein(Soy Bean Powder)<br>Transmission(Microscope) |

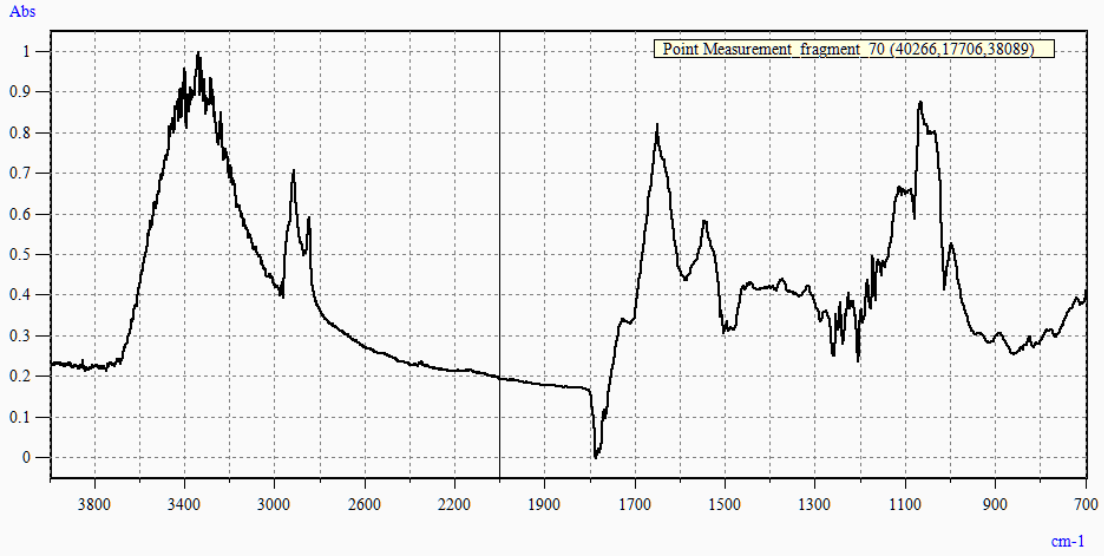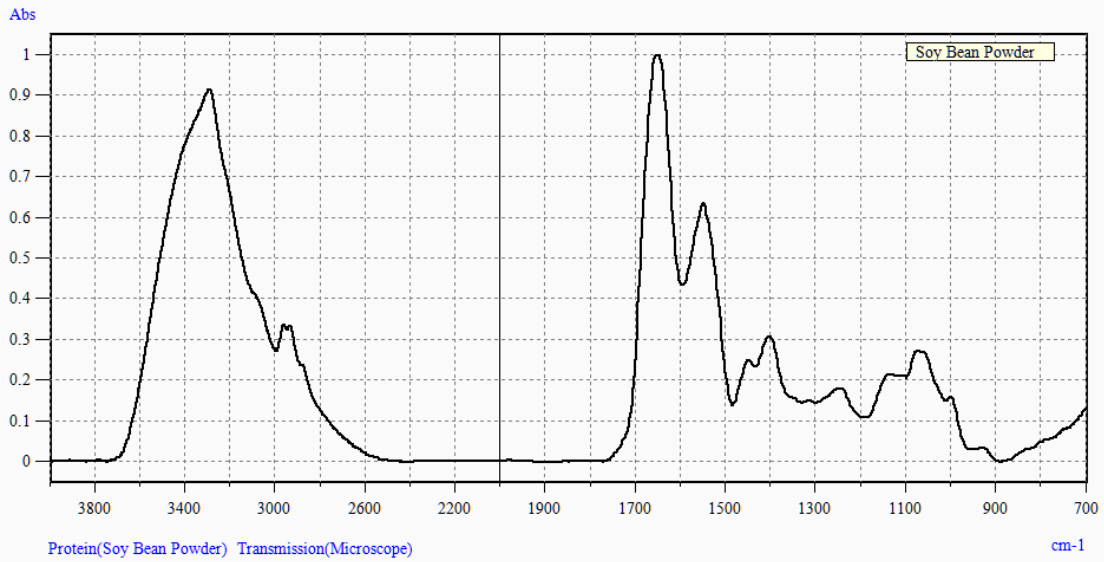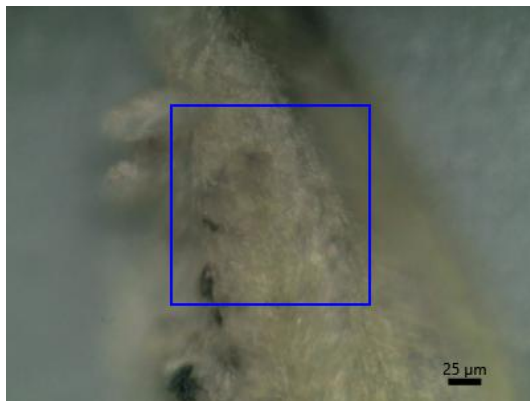

## Search Result Report

---

Filename : C:\Users\User\Desktop\UTSA samples\DR041120HT03\Point  
 Measurement\_fragment\_71.apit  
 Acquired Datetime : 2022/11/11 19:05:04

● **Search Parameters**

Library list :  
 IRs Polymer2  
 ATR-Polymer2  
 T-Polymer2  
 Maximum hits: 200  
 Minimum quality : 0  
 Algorithm : DiffDeriv

| Score | Library    | Name | Comment                                               |
|-------|------------|------|-------------------------------------------------------|
| 618   | T-Polymer2 | PPS  | Polyphenylene Sulfie(PPS)<br>Transmission(Microscope) |

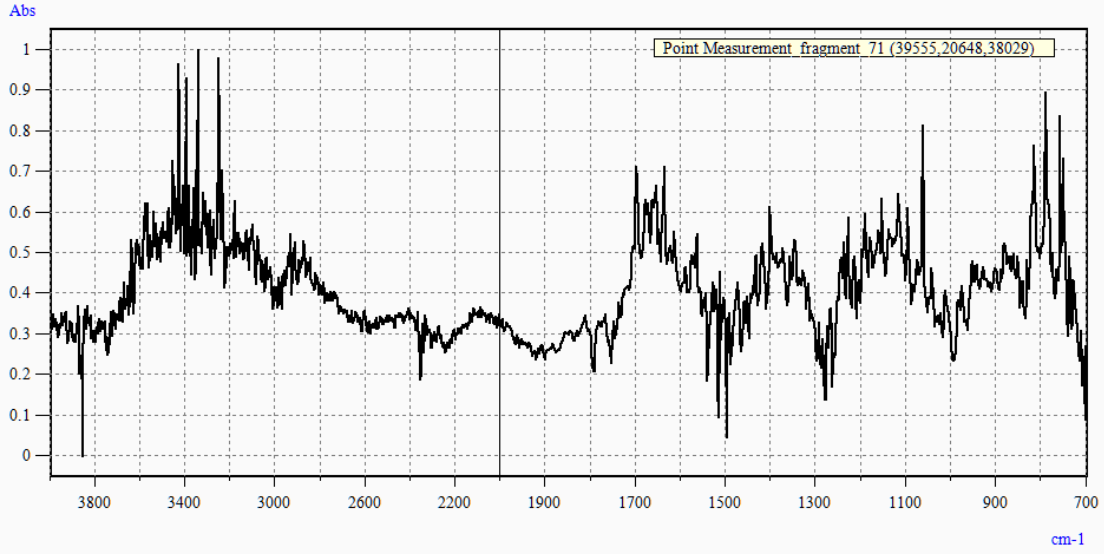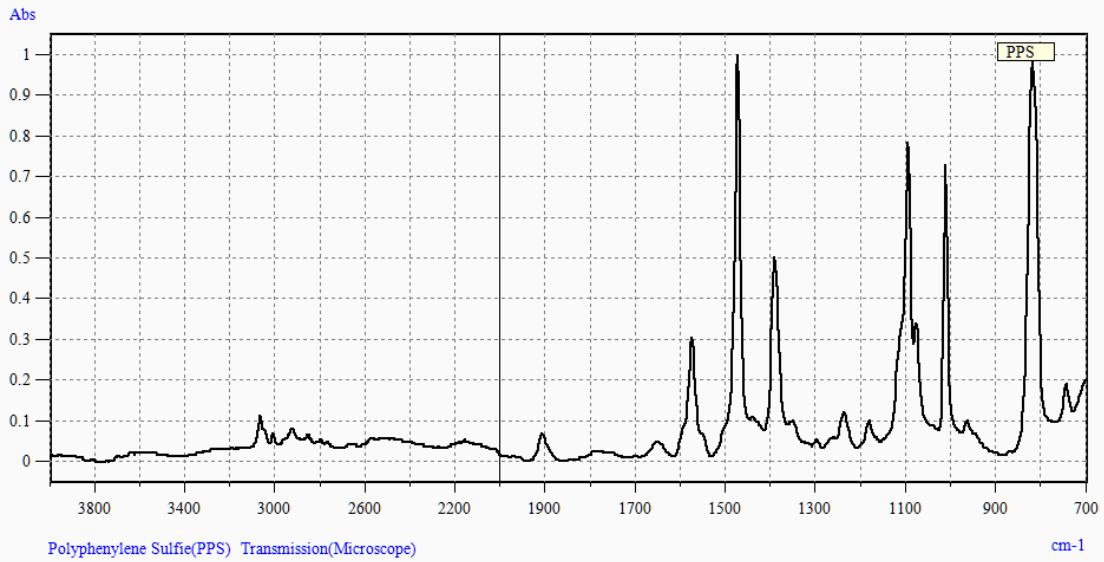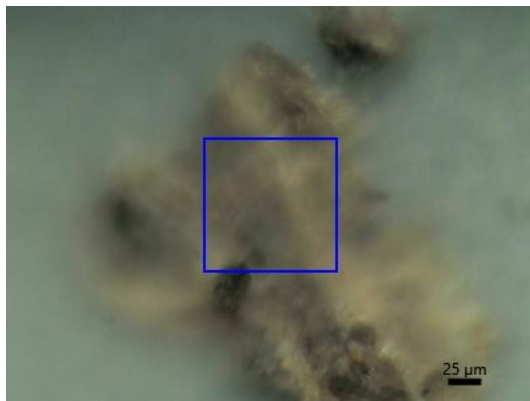

## Search Result Report

---

Filename : C:\Users\User\Desktop\UTSA samples\DR041120HT03\Point  
 Measurement\_fragment\_72.apit  
 Acquired Datetime : 2022/11/11 19:07:13

● **Search Parameters**

Library list :  
 IRs Polymer2  
 ATR-Polymer2  
 T-Polymer2  
 Maximum hits: 200  
 Minimum quality : 0  
 Algorithm : DiffDeriv

| Score | Library    | Name         | Comment                                                    |
|-------|------------|--------------|------------------------------------------------------------|
| 588   | T-Polymer2 | Irganox 1330 | Polymer Additive(Irganox 1330)<br>Transmission(Microscope) |

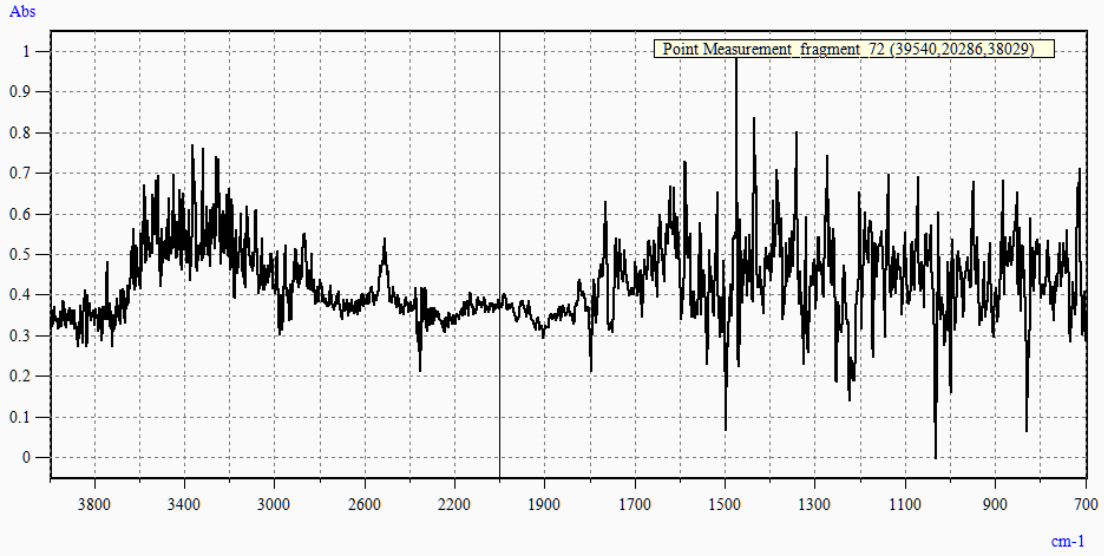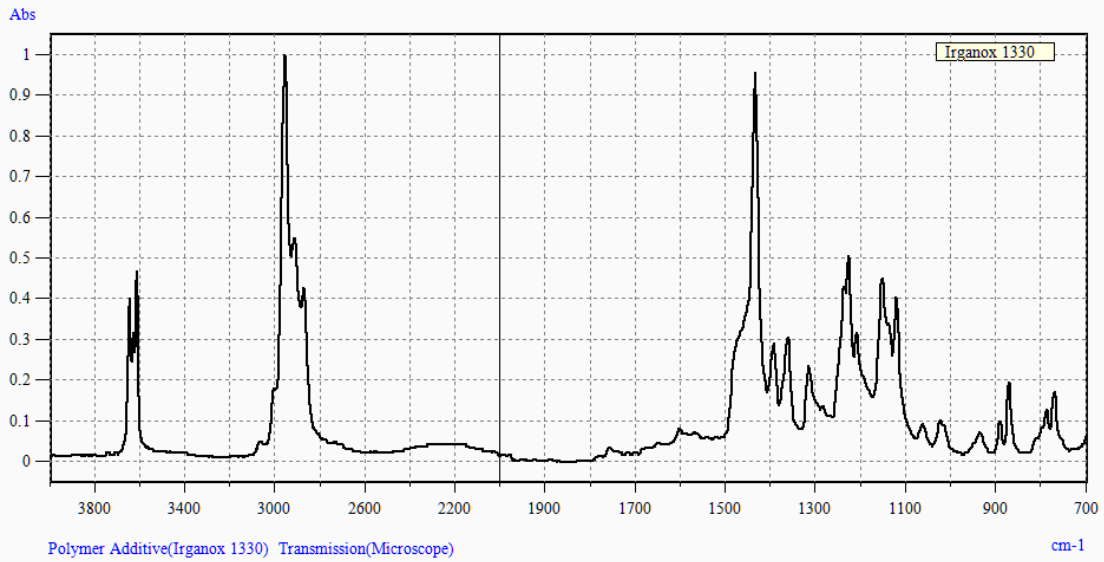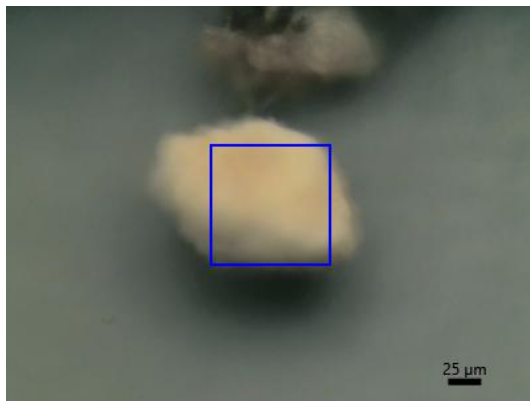

## Search Result Report

---

Filename : C:\Users\User\Desktop\UTSA samples\DR041120HT03\Point  
 Measurement\_fragment\_73.apit

Acquired Datetime : 2022/11/11 19:11:12

● **Search Parameters**

Library list :

IRs Polymer2

ATR-Polymer2

T-Polymer2

Maximum hits: 200

Minimum quality : 0

Algorithm : DiffDeriv

| Score | Library    | Name          | Comment                                   |
|-------|------------|---------------|-------------------------------------------|
| 641   | T-Polymer2 | Polyacetylene | Polyacetylene<br>Transmission(Microscope) |

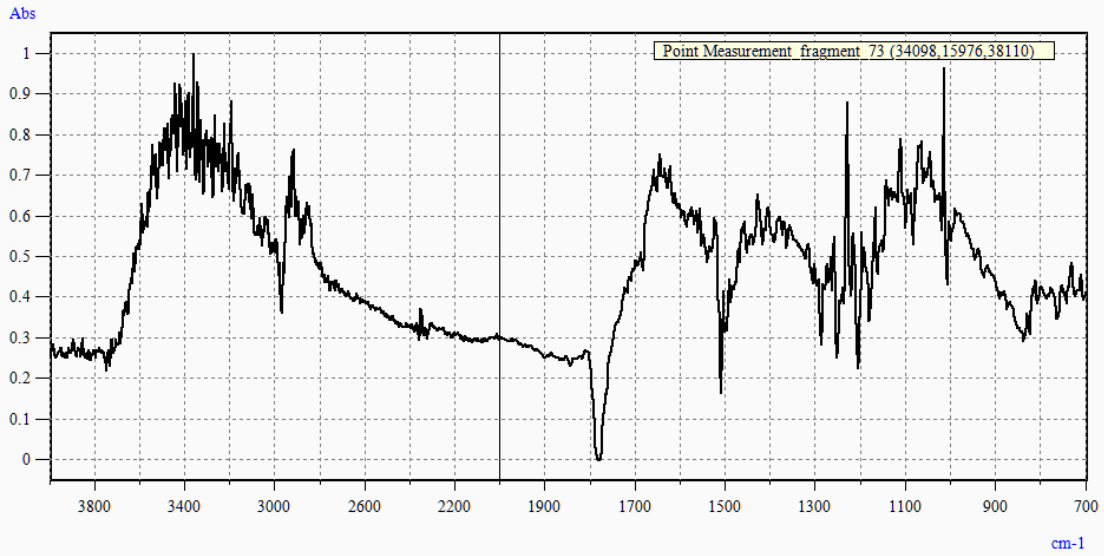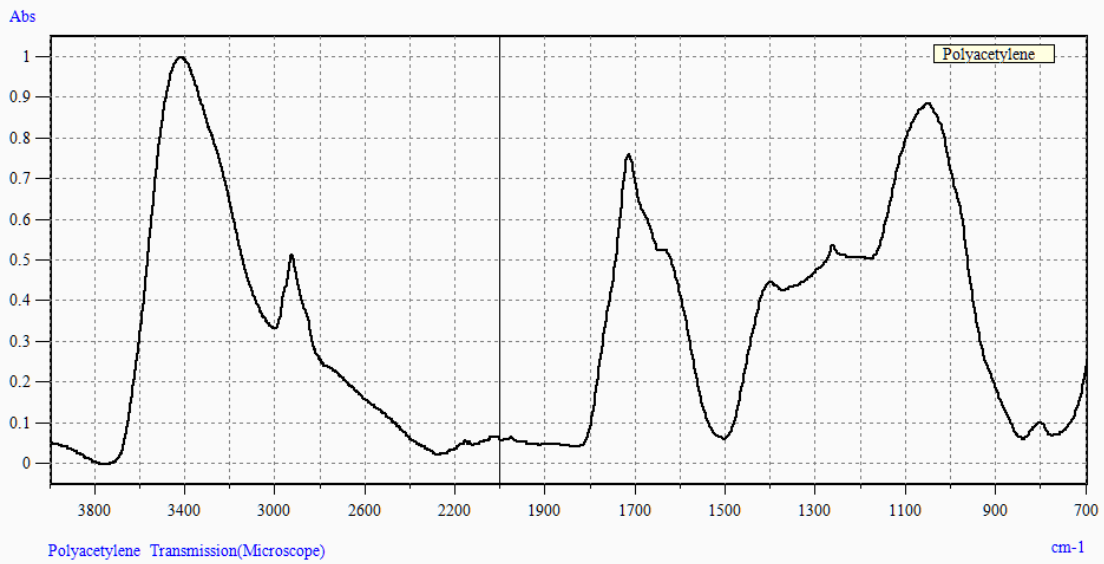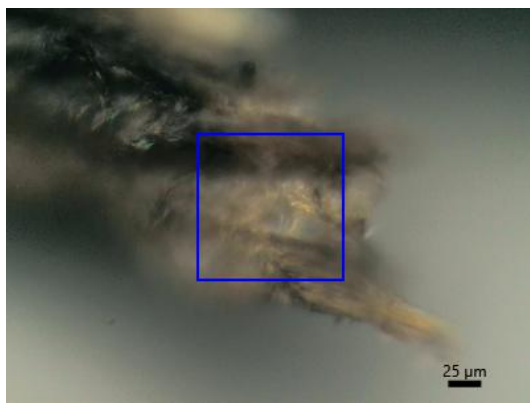

## Search Result Report

Filename : C:\Users\User\Desktop\UTSA samples\DR041120HT03\Point  
 Measurement\_fragment\_74.apit  
 Acquired Datetime : 2022/11/11 20:13:03

### ● Search Parameters

Library list :  
 IRs Polymer2  
 ATR-Polymer2  
 T-Polymer2  
 Maximum hits: 200  
 Minimum quality : 0  
 Algorithm : DiffDeriv

| Score | Library      | Name                            | Comment                                                                 |
|-------|--------------|---------------------------------|-------------------------------------------------------------------------|
| 595   | ATR-Polymer2 | D_PVC with<br>TerephthalicEster | Polyvinylchloride with BIS(2-<br>Ehylhexyl)Terephthalate<br>DuraSamplIR |

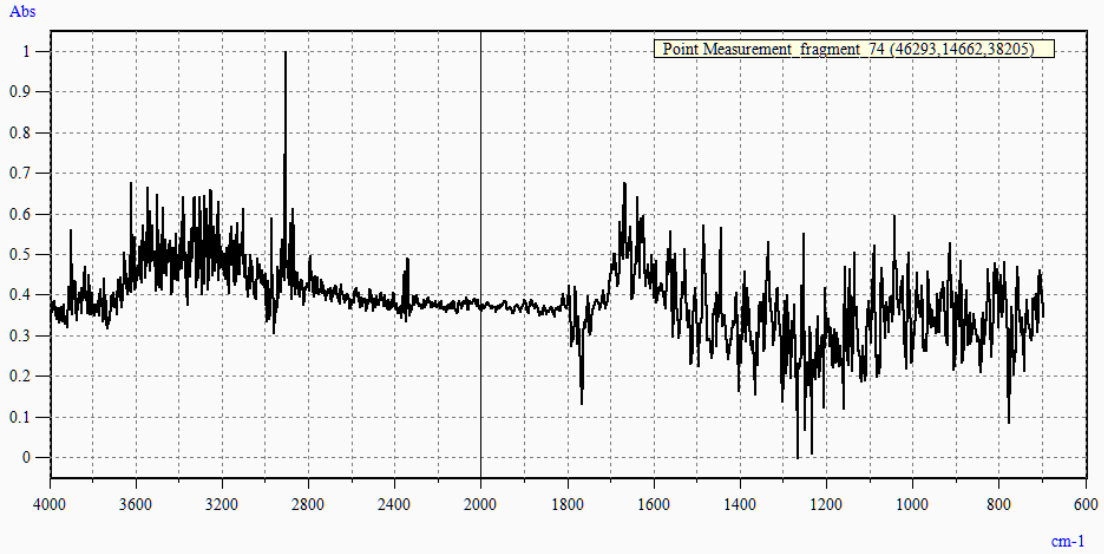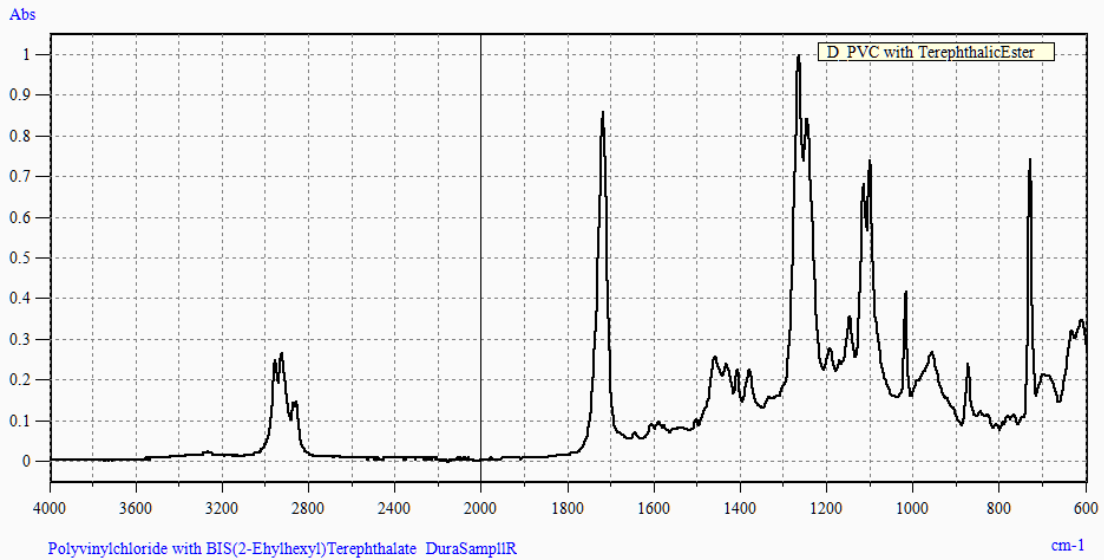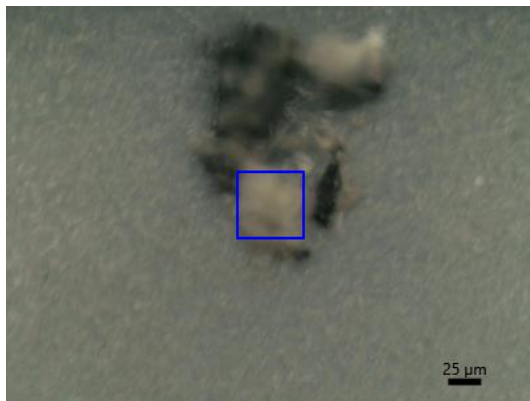

## Search Result Report

---

Filename : C:\Users\User\Desktop\UTSA samples\DR041120HT03\Point  
 Measurement\_fragment\_75.apit  
 Acquired Datetime : 2022/11/11 20:17:25

● **Search Parameters**

Library list :  
 IRs Polymer2  
 ATR-Polymer2  
 T-Polymer2  
 Maximum hits: 200  
 Minimum quality : 0  
 Algorithm : DiffDeriv

| Score | Library      | Name | Comment                                      |
|-------|--------------|------|----------------------------------------------|
| 657   | IRs Polymer2 | PC   | Polycarbonate/CD-ROMATR/diamond ATRcorrected |

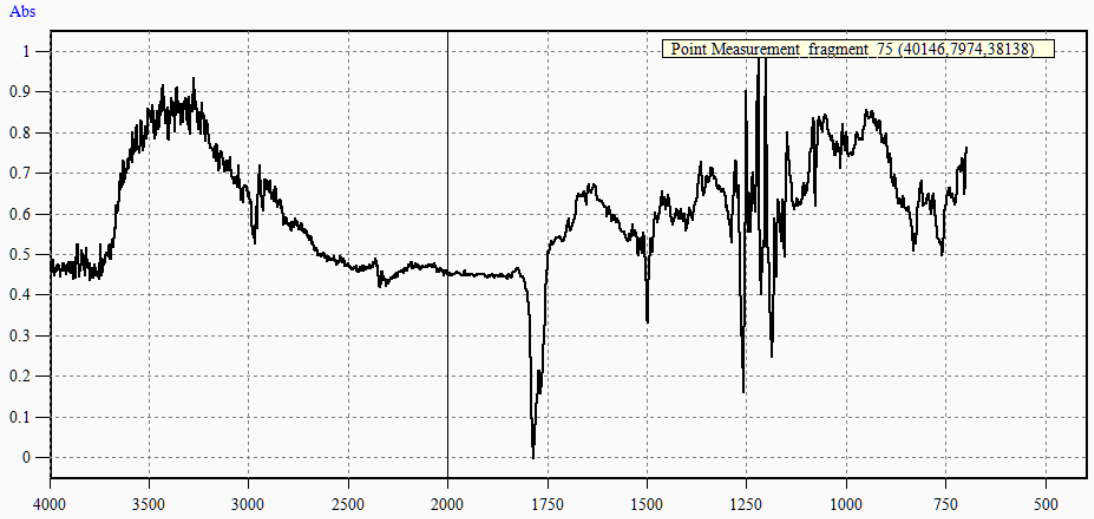

cm-1

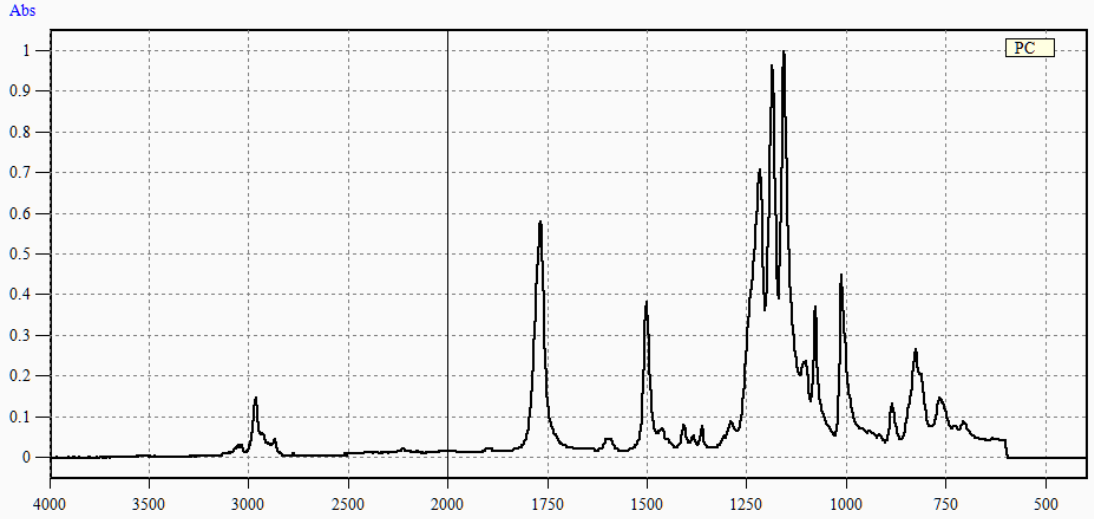

Polycarbonate/CD-ROMATR/diamond ATRcorrected

cm-1

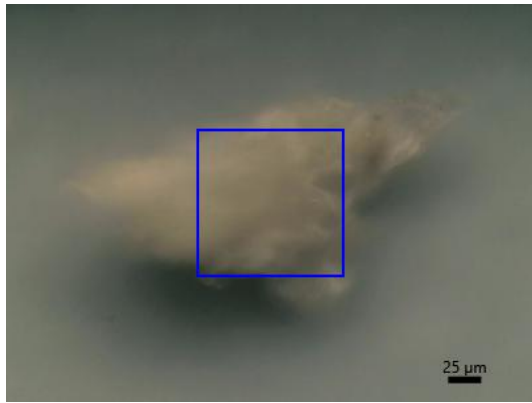

## Search Result Report

---

Filename : C:\Users\User\Desktop\UTSA samples\DR041120HT03\Point  
 Measurement\_fragment\_76.apit  
 Acquired Datetime : 2022/11/11 20:22:32

● **Search Parameters**

Library list :  
 IRs Polymer2  
 ATR-Polymer2  
 T-Polymer2  
 Maximum hits: 200  
 Minimum quality : 0  
 Algorithm : DiffDeriv

| Score | Library      | Name    | Comment        |
|-------|--------------|---------|----------------|
| 656   | IRs Polymer2 | NY-MXD6 | Nylon MXD6Film |

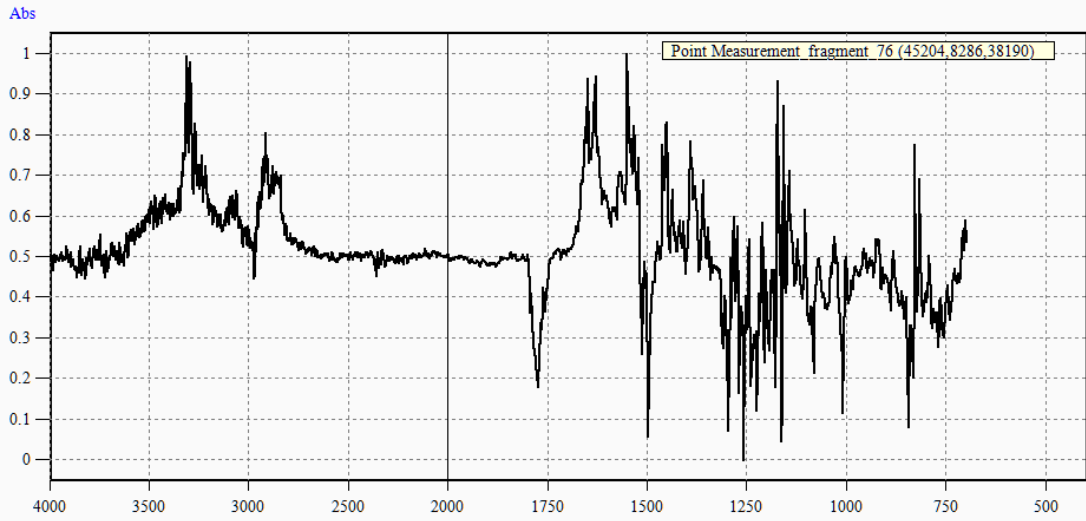

cm-1

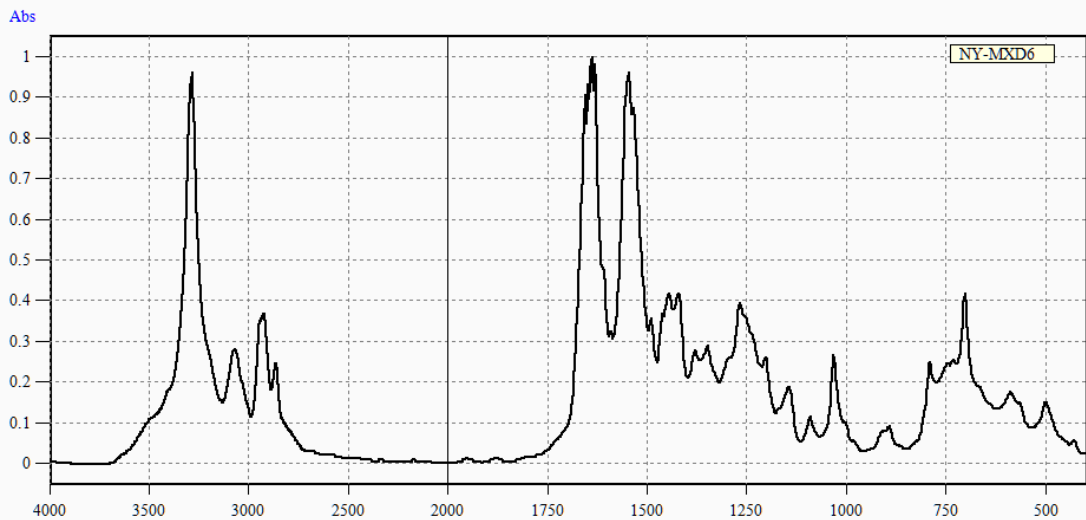

Nylon MXD6Film

cm-1

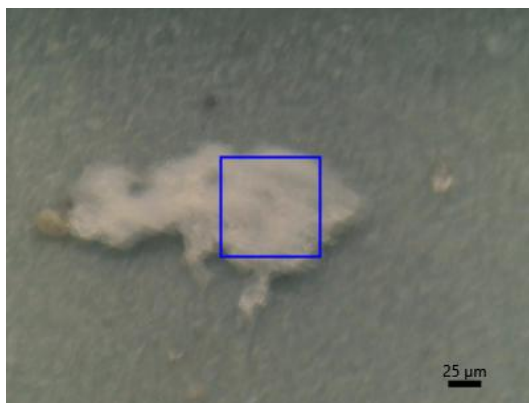

## Search Result Report

---

Filename : C:\Users\User\Desktop\UTSA samples\DR041120HT03\Point  
 Measurement\_fragment\_77.apit  
 Acquired Datetime : 2022/11/11 20:25:51

● **Search Parameters**

Library list :  
 IRs Polymer2  
 ATR-Polymer2  
 T-Polymer2  
 Maximum hits: 200  
 Minimum quality : 0  
 Algorithm : DiffDeriv

| Score | Library      | Name               | Comment                         |
|-------|--------------|--------------------|---------------------------------|
| 580   | ATR-Polymer2 | D_Polycaprolactone | Polycaprolactone DuraSamplIR-II |

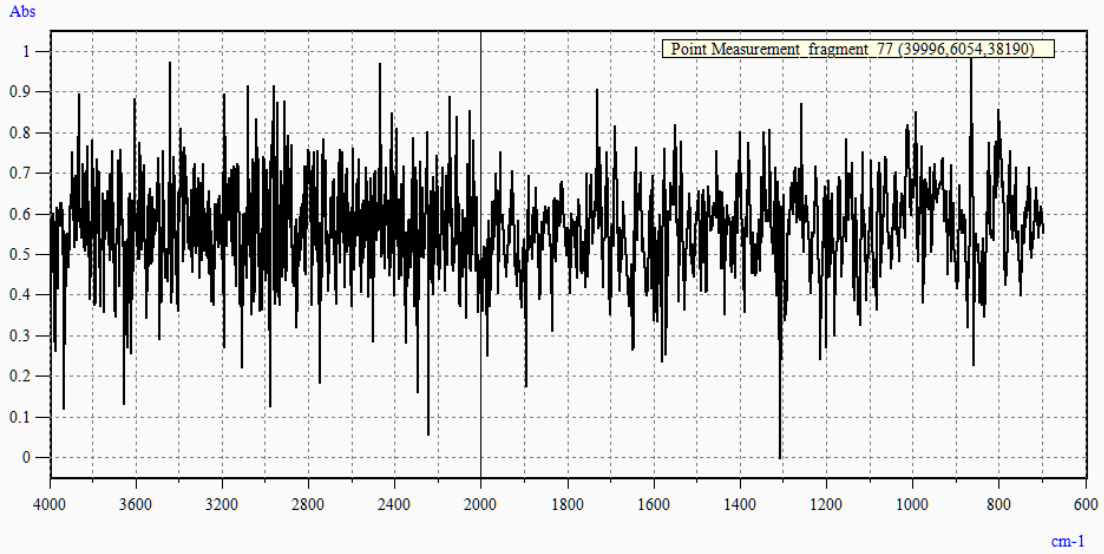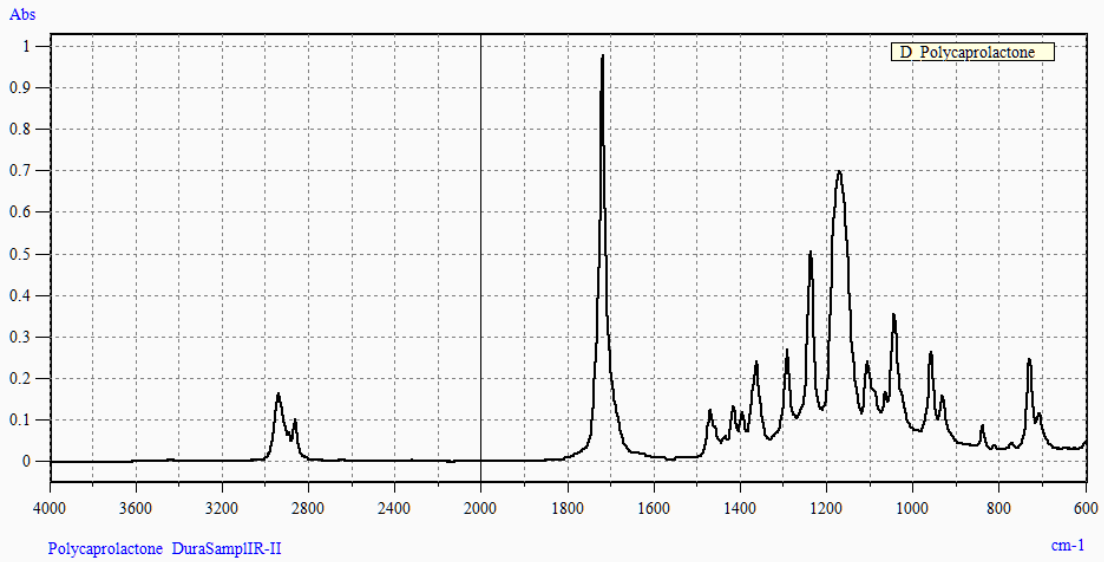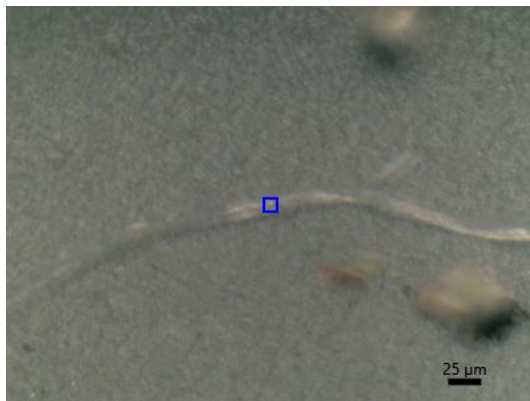

## Search Result Report

---

Filename : C:\Users\User\Desktop\UTSA samples\DR041120HT03\Point  
 Measurement\_fragment\_78.apit  
 Acquired Datetime : 2022/11/11 20:33:31

### ● Search Parameters

Library list :  
 IRs Polymer2  
 ATR-Polymer2  
 T-Polymer2  
 Maximum hits: 200  
 Minimum quality : 0  
 Algorithm : DiffDeriv

| Score | Library    | Name | Comment                                       |
|-------|------------|------|-----------------------------------------------|
| 638   | T-Polymer2 | PC   | Polycarbonate(PC)<br>Transmission(Microscope) |

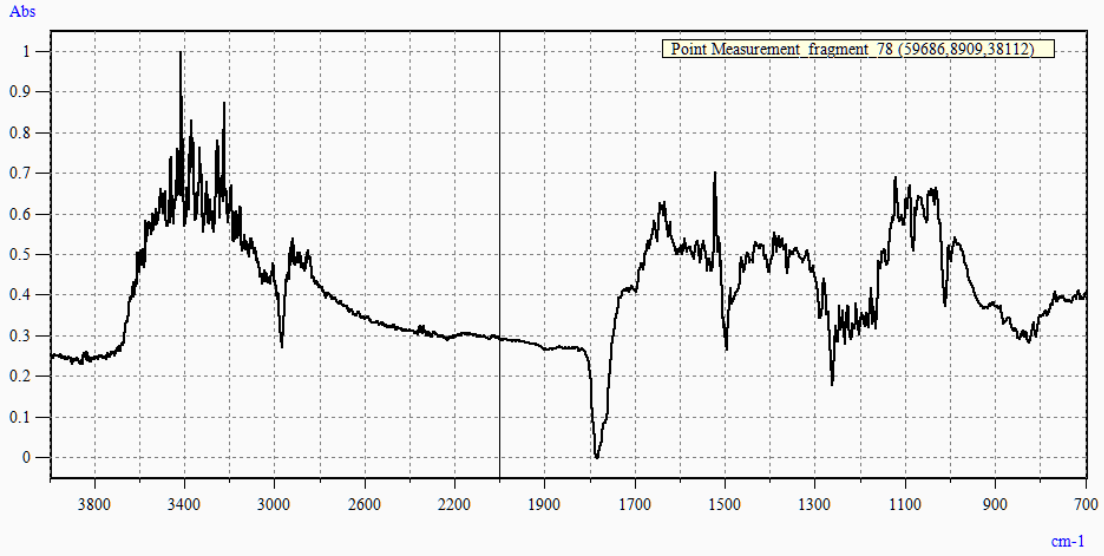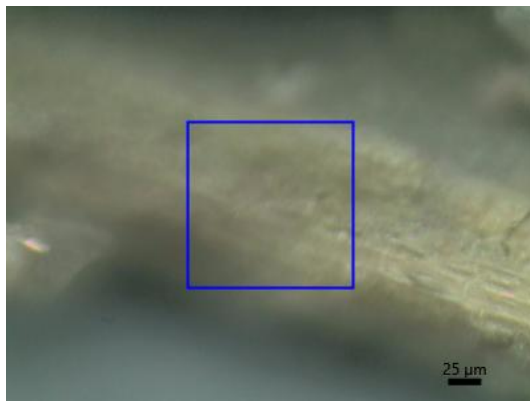

## Search Result Report

---

Filename : C:\Users\User\Desktop\UTSA samples\DR041120HT03\Point

Measurement\_fragment\_79.apit

Acquired Datetime : 2022/11/11 20:39:13

● **Search Parameters**

Library list :

IRs Polymer2

ATR-Polymer2

T-Polymer2

Maximum hits: 200

Minimum quality : 0

Algorithm : DiffDeriv

| Score | Library      | Name | Comment                             |
|-------|--------------|------|-------------------------------------|
| 645   | ATR-Polymer2 | D_PC | Polycarbonate(PC)<br>DuraSamplIR-II |

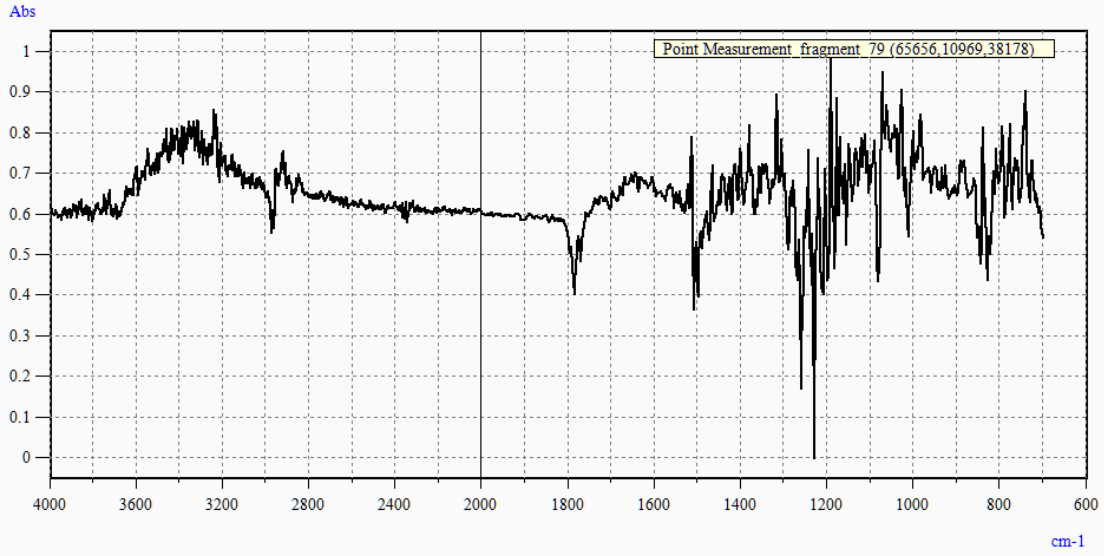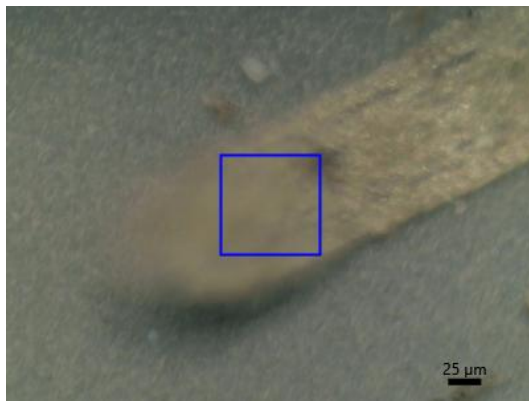

## Search Result Report

---

Filename : C:\Users\User\Desktop\UTSA samples\DR041120HT03\Point  
 Measurement\_fragment\_80.apit  
 Acquired Datetime : 2022/11/11 20:46:51

● **Search Parameters**

Library list :  
 IRs Polymer2  
 ATR-Polymer2  
 T-Polymer2  
 Maximum hits: 200  
 Minimum quality : 0  
 Algorithm : DiffDeriv

| Score | Library    | Name                        | Comment                                                                                 |
|-------|------------|-----------------------------|-----------------------------------------------------------------------------------------|
| 569   | T-Polymer2 | High-trans<br>Polybutadiene | High-trans Butadiene<br>Rubber(High-trans<br>Polybutadiene)<br>Transmission(Microscope) |

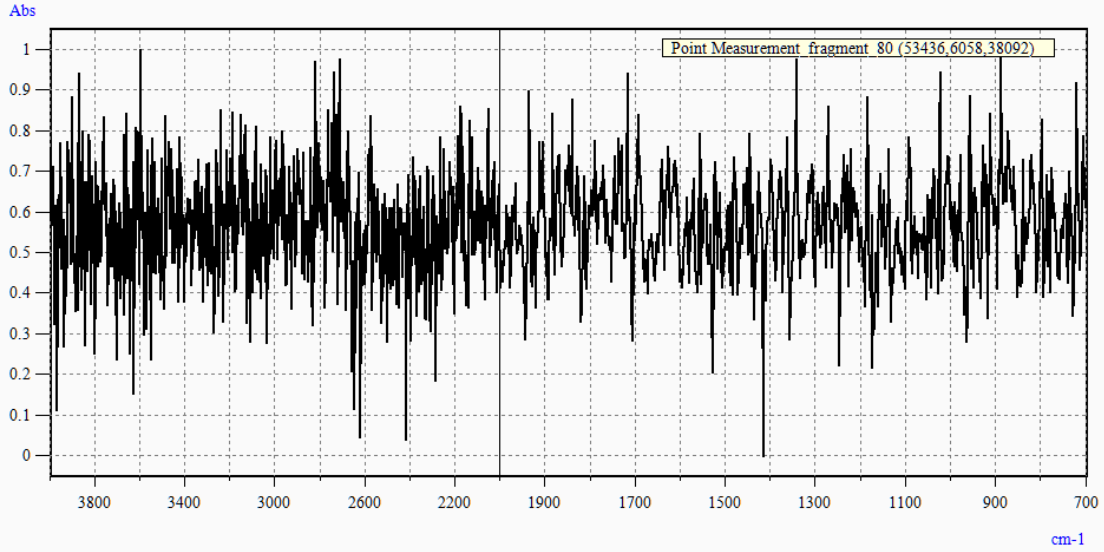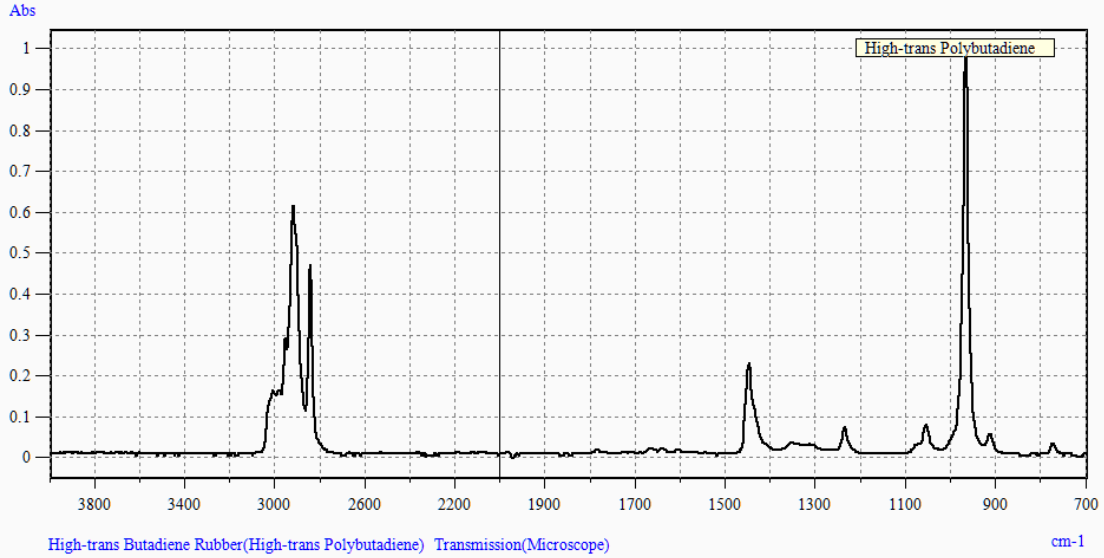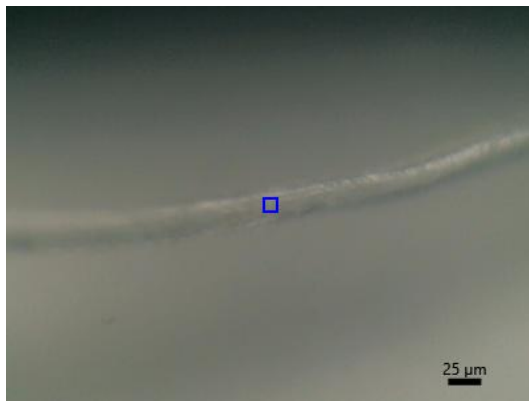

## Search Result Report

Filename : C:\Users\User\Desktop\UTSA samples\DR041120HT03\Point  
 Measurement\_fragment\_81.apit  
 Acquired Datetime : 2022/11/11 20:56:31

### ● Search Parameters

Library list :  
 IRs Polymer2  
 ATR-Polymer2  
 T-Polymer2  
 Maximum hits: 200  
 Minimum quality : 0  
 Algorithm : DiffDeriv

| Score | Library         | Name        | Comment                                                                              |
|-------|-----------------|-------------|--------------------------------------------------------------------------------------|
| 579   | IRs<br>Polymer2 | Irganox1010 | Irganox1010ANTIOXIDANT(Phenol)C73H108O12CAS<br>NO. 6683-19-8ATR/diamond ATRcorrected |

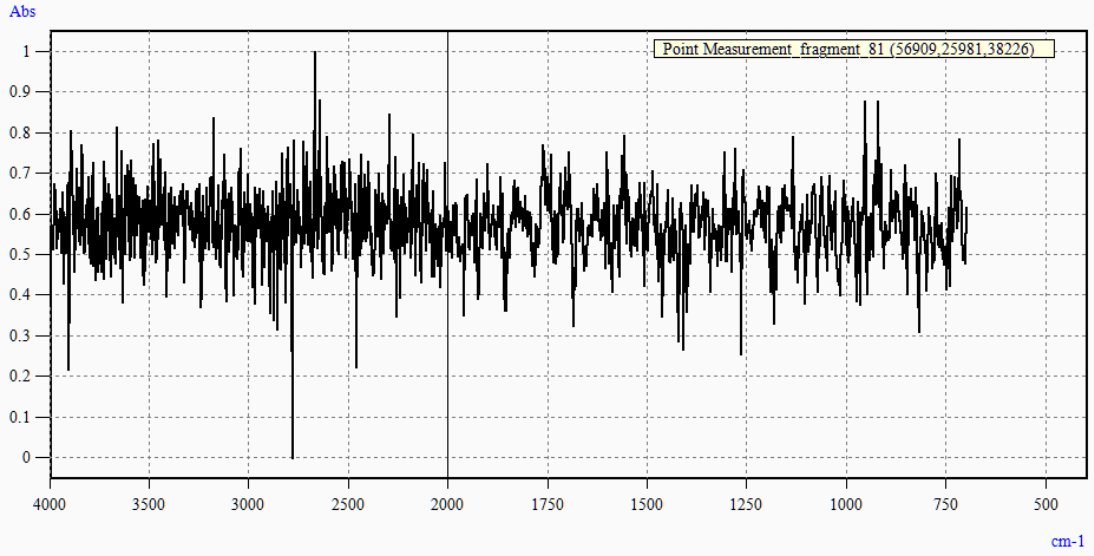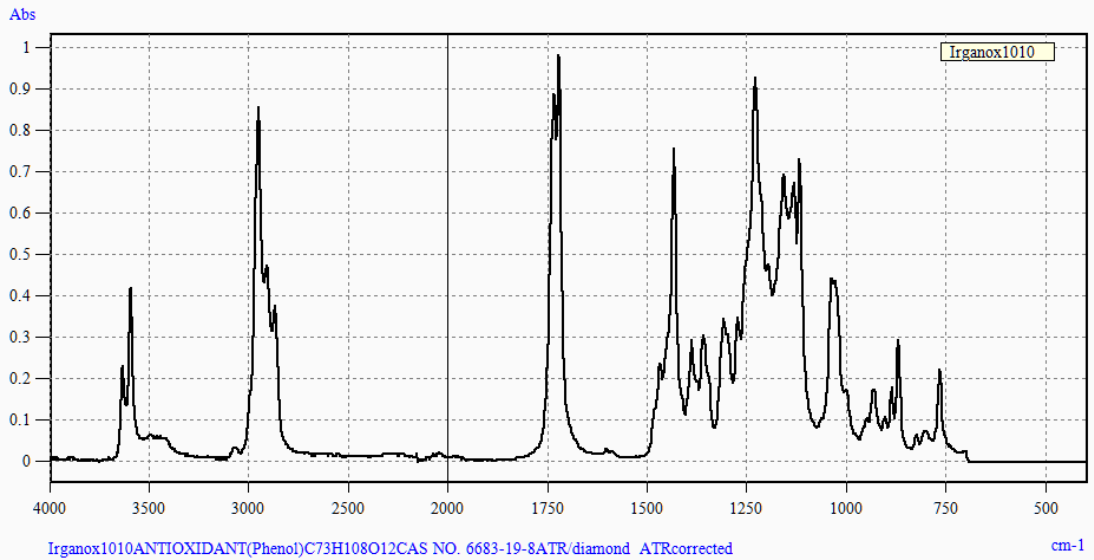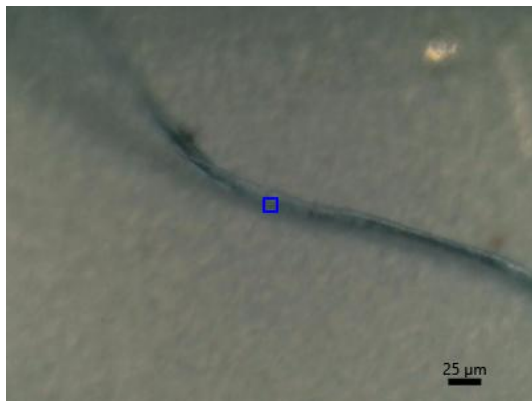

## Search Result Report

Filename : C:\Users\User\Desktop\UTSA samples\DR041120HT03\Point  
 Measurement\_fragment\_82.apit  
 Acquired Datetime : 2022/11/11 21:01:54

### ● Search Parameters

Library list :  
 IRs Polymer2  
 ATR-Polymer2  
 T-Polymer2  
 Maximum hits: 200  
 Minimum quality : 0  
 Algorithm : DiffDeriv

| Score | Library      | Name | Comment                                                                  |
|-------|--------------|------|--------------------------------------------------------------------------|
| 595   | IRs Polymer2 | PVDC | PVDC,Poly (vinylidene chloride)<br>/wlap filmATR/diamond<br>ATRcorrected |

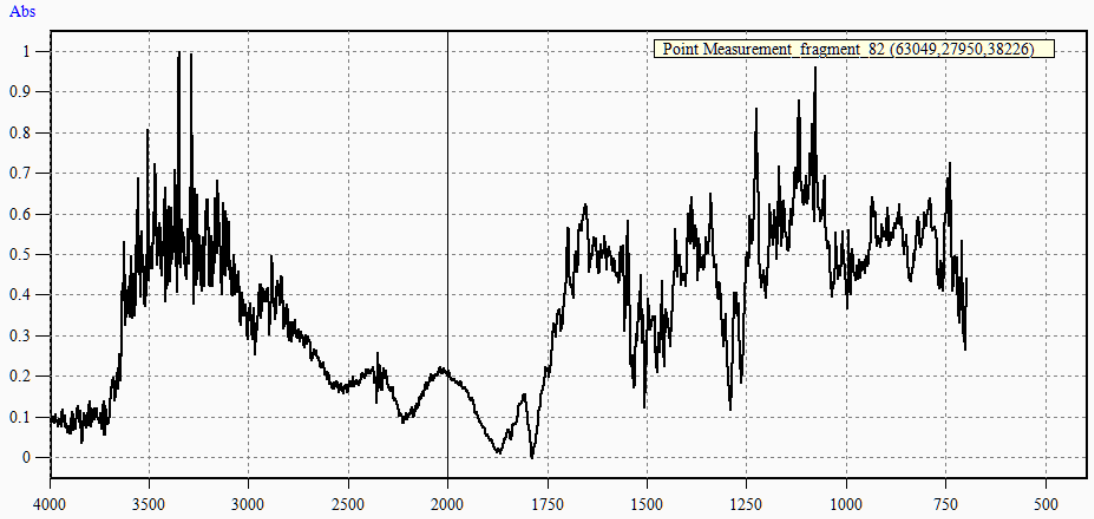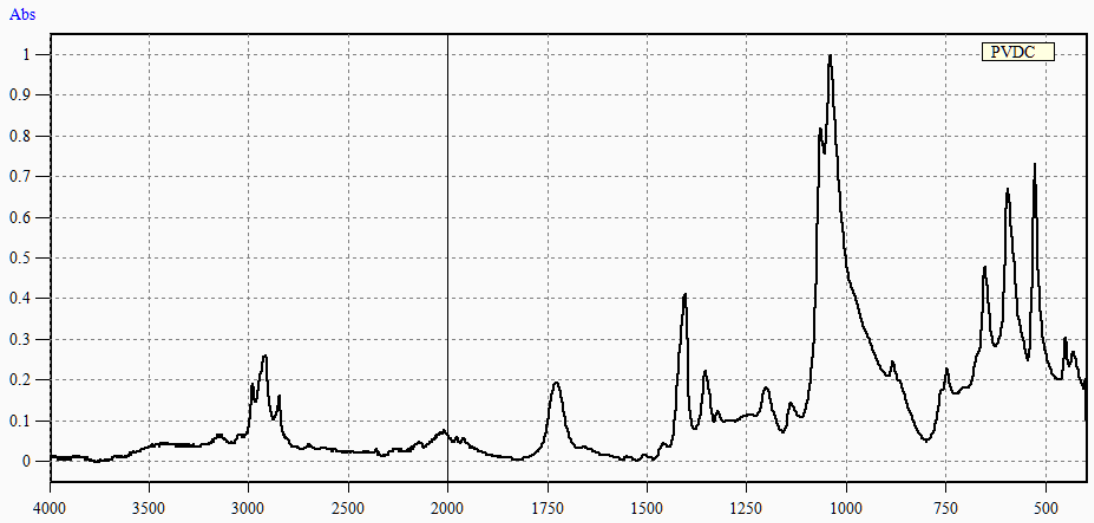

PVDC, Poly (vinylidene chloride) /wlap filmATR/diamond ATRcorrected

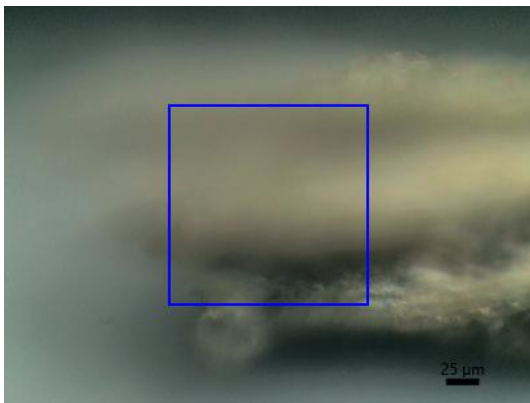

Supplement: Supplementary file 2 [file 827eaa14bf2b8a347b9439f4.pdf]
