# Supplementary material
Source: Research Square preprint supplement (doi:10.21203/rs.3.rs-9512208/v1)
Supplement: Supplementary file 1 [file 7f2a00747b4b1da339cec3d2.xlsx]

## Sheet: Physical Properties
				axis length (mm)
Count	Sample		Mass (g)	x-axis	y-axis	z-axis	Filter paper wt (mg)	pH	temp (C)	mV	µS	Vol (ml) Melt Water	TOC	Sample #	Calculated mass (g)
1	DR041120HA10	Before	131	69.3	63.7	63.5	17.4	7.11	22.3	10	25	100			146.773
		After	108	63.8	62.2	57.6	NR								119.683
		Loss	23	5.5	1.5	5.9	NR								27.0897
2	DR041120HA32	Before	NR	NR	NR	NR	17.96								NR			Count	Sample	Mass Before Rinising (g)	Diameter Before Rinsing (mm)			Mass After Rinising (g)	Diameter After Rinsing (mm)			Mass Lost (g)
		After	NR	NR	NR	NR	18.03														x	y	z		x	y	z
		Loss					0.07											1	DR041120HA10	131	69.3	63.7	63.5	108	63.8	62.2	57.6	23
																		2	DR041120HA32	NR	NR	NR	NR	NR	NR	NR	NR	NR
3	DR041120HD03	Before	91	69.6	58.6	47.8	17.41	7.4	22.1	-13	32	75			102.078			3	DR041120HD03	91	69.6	58.6	47.8	77	66.9	56.1	40.3	14
		After	77	66.9	56.1	40.3	NR								79.1941			4	DR041120HE02	69	61.72	53.12	44.43	58	52.21	48.32	36.5	11
		Loss	14	2.7	2.5	7.5	NR								22.8842			5	DR041120HG02	158	68.35	68.42	69.49	134	66.05	63.14	62.19	24
																		6	DR041120HG06	199	80.03	76.41	66.4	179	72.71	66.28	60.31	20
4	DR041120HE02	Before	69	61.72	53.12	44.43	17.64	6.79	22.4	24	13	53		36	76.2709			7	DR041120HJ03	109	68.25	63.08	48.27	90	NR	NR	NR	NR
		After	58	52.21	48.32	36.5	18.05								48.2139			8	DR041120HJ28	99	61.44	58.86	49.86	56	54.97	49.49	37.55	43
		Loss	11	9.51	4.8	7.93	0.41								28.057			9	DR041120HM01	79	66.66	54.87	44.46	58	55.3	55.36	33.74	21
																		10	DR041120HR01	58	47.91	51.74	36.61	47	43.12	49.67	31.17	11
5	DR041120HG02	Before	158	68.35	68.42	69.49	17.17	6.63	22.6	35	7	145		38	170.154			11	DR041120HT03	135	74.6	69.01	53.8	118	69.8	64.71	47.03	17
		After	134	66.05	63.14	62.19	17.34								135.799			12	UV042821HA04	NR	NR	NR	NR	NR	NR	NR	NR	NR
		Loss	24	2.3	5.28	7.3	0.17								34.3551			13	UV042821HA05	NR	NR	NR	NR	NR	NR	NR	NR	NR
																		14	UV042821HA11	69	58.3	50.6	46.86	56	54.39	46.97	42.71	13
6	DR041120HG06	Before	199	80.03	76.41	66.4	16.43	6.93	22.2	18	16	180		34	212.603			15	UV042821HA12	121	69.94	64.39	56.02	NR	66.72	62.93	52.8	NR
		After	179	72.71	66.28	60.31	16.73								152.182			16	UV042821HA22	125	67.79	64.05	59.55	109	59.53	61.86	59.02	16
		Loss	20	7.32	10.13	6.09	0.3								60.4207			17	UV042821HA31	94	65.13	59.08	43.46	62	63	49.94	38.96	32
																		18	UV042821HA34	38	49.36	48.95	27.63	18	43.6	37.67	19.16	20
7	DR041120HJ03	Before	109	68.25	63.08	48.27	NR	7.07	23.7	10	11	90	2.039	26	108.81			19	UV042821HA46	78	75.13	50.07	42.22	58	67.88	43.76	39.2	20
		After	90				18.33								0			20	UV042821HA48	67	82.05	63.05	22.11	43	74.51	55.47	16.01	24
		Loss	19				NR											21	UV042821HA52	76	59.64	56.46	51.91	53	55.65	49.55	36.64	23
8	DR041120HJ28	Before	99	61.44	58.86	49.86	17.66	6.4	24	41	9	60		56	94.4109
		After	56	54.97	49.49	37.55	17.74								53.4874
		Loss	43	6.47	9.37	12.31	0.08								40.9235
9	DR041120HM01	Before	79	66.66	54.87	44.46	17.08	6.31	23.4	55	7			52	85.1468
		After	58	55.3	55.36	33.74	17.21								54.0835
		Loss	21	11.36	-0.49	10.72	0.13								31.0633
10	DR041120HR01	Before	58	47.91	51.74	36.61		7.01	22.3	9	20	50		35	47.5172
		After	47	43.12	49.67	31.17	18.87								34.9549
		Loss	11	4.79	2.07	5.44	#VALUE!								12.5623
11	DR041120HT03	Before	135	74.6	69.01	53.8	18.29	6.96	22.7	16	18			41	145.021
		After	118	69.8	64.71	47.03	18.66								111.224
		Loss	17	4.8	4.3	6.77	-0.37								33.7968
12	UV042821HA04	Before	NR	NR	NR	NR	NR	6.33	23.5	51	35	70	5.497
		After	NR	NR	NR	NR	17.74
		Loss					NR
13	UV042821HA05	Before	NR	NR	NR	NR	NR	6.69	23.7	32	44	65
		After	NR	NR	NR	NR	16.52
		Loss					NR
14	UV042821HA11	Before	69	58.3	50.6	46.86	17.21	6.4	23.8	48	8			67	72.3802
		After	56	54.39	46.97	42.71	17.45								57.1305
		Loss	13	3.91	3.63	4.15	0.24								15.2498
15	UV042821HA12	Before	121	69.94	64.39	56.02	17.67							69	132.095
		After	0	66.72	62.93	52.8	17.96								116.077
		Loss	121	3.22	1.46	3.22	0.29								16.0178
16	UV042821HA22	Before	125	67.79	64.05	59.55	17.76	6.14	23.8	70	8	110		65	135.383
		After	109	59.53	61.86	59.02	17.94								113.8
		Loss	16	8.26	2.19	0.53	0.18								21.583
17	UV042821HA31	Before	94	65.13	59.08	43.46	17.64	6.63	24	35	7	60		57	87.5608
		After	62	63	49.94	38.96	17.83								64.181
		Loss	32	2.13	9.14	4.5	0.19								23.3798
18	UV042821HA34	Before	38	49.36	48.95	27.63	17.34	6.69	23.6	31	10			84	34.9548
		After	18	43.6	37.67	19.16	17.73								16.4769
		Loss	20	5.76	11.28	8.47	0.39								18.4779
19	UV042821HA46	Before	78	75.13	50.07	42.22	17.16	6.45	23.4	44	10			72	83.1587
		After	58	67.88	43.76	39.2	17.66								60.9683
		Loss	20	7.25	6.31	3.02	0.5								22.1905
20	UV042821HA48	Before	67	82.05	63.05	22.11	17.1	6.2	23.8	61	16			74	59.8895
		After	43	74.51	55.47	16.01	17.28								34.6468
		Loss	24	7.54	7.58	6.1	0.18								25.2428
21	UV042821HA52	Before	76	59.64	56.46	51.91	16.21	6.53	23.7	41	10	60		61	91.5226
		After	53	55.65	49.55	36.64	16.34								52.9009
		Loss	23	3.99	6.91	15.27	0.13								38.6217

## Sheet: Master MP
		total	288	Film	19	Fragment	200		Chi square for morphology shapes is found in cell P151
				Fiber	68	Sphere	1
Count	Sample	Extension Number	number	Type	Score	Maximum Hits	Library	Abbreviation	Comment	City Code	City	Score
1	DR042820HA10	92	1	Fragment	637	IRs Polymer2	PC	PC	Polycarbonate/CD-ROMATR/diamond ATRcorrected	D	Del Rio	637
2	DR042820HA10	93	2	Fragment	659	T-Polymer2	PC	PC	Polycarbonate(PC) Transmission(Microscope)	D	Del Rio	659		1	2	3	4	5	6	7	8	9	10	11	12	13	14	15	16	17	18	19	20	21	22	23	24	25	26	27	28	29	30	31	32	33	34	35	36
3	DR042820HA10	94	3	Fragment	586	ATR-Polymer2	D_IR-trans	RUBB	trans-Polyisoprene Rubber (IR-trans) Dura Sampl IR-II	D	Del Rio	586	Count of Abbreviation	Column Labels
4	DR042820HA10	96	5	Fragment	592	ATR-Polymer2	D_Polyester1	PET	Polyester Elastomer DuraSamplIR-II	D	Del Rio	592	Row Labels	ACR	ARA	BMC	BR3	DLTDP	EPX	EVA	FEP	HDPE	HERB	HLAS	HRB	IIR	LDPE	LS770	MEL	NYL	PA	PAC	PAM	PAP	PAR	PB1	PBT	PC	PCL	PDI	PEEK	PEG	PEI	PEPQ	PES	PET	PETG	PHSI	PI
5	DR042820HA10	97	6	Fragment	620	T-Polymer2	PC	PC	Polycarbonate(PC) Transmission(Microscope)	D	Del Rio	620	Del Rio	1		1	7		4			1		1	3		1	1		3	5	2	1	1		1	1	50	1		2	4	2	1	1	4			3
6	DR042820HA10	98	7	Fiber	587	IRs Polymer2	Irganox1010	PA	Irganox 1010 ANTIOXIDANT (Phenol) C73H108O12 CAS NO. 6683-19-8 ATR/diamond ATR corrected	D	Del Rio	587	Uvalde		1		7	3	19	1	2	1	1	1		1	2	3	1	2	13	1	1		2		1	37		1	1	5	1	2	2	1	2	1	8
7	DR042820HA10	99	8	Fragment	670	ATR-Polymer2	D_PC	PC	Polycarbonate(PC) DuraSamplIR-II	D	Del Rio	670	Grand Total	1	1	1	14	3	23	1	2	2	1	2	3	1	3	4	1	5	18	3	2	1	2	1	2	87	1	1	3	9	3	3	3	5	2	1	11
8	DR042820HA32	48	1	Fiber	575	IRs Polymer2	PS	PS	Polystyrene ATR/diamond ATR corrected	D	Del Rio	575
9	DR042820HA32	49	2	Fragment	581	ATR-Polymer2	D_Poly_alpha_Methylstyrene	PAM	Poly (alpha-Methylstyrene) Dura Sampl IR-II	D	Del Rio	581
10	DR042820HA32	50	3	Fiber	569	IRs Polymer2	PI2	PI	Polyimide Film	D	Del Rio	569		ACR	BMC	BR3	EPX	HDPE	HLAS	HRB	LDPE	LS770	NYL	PA	PAC	PAM	PAP	PB1	PBT	PC	PCL	PEEK	PEG	PEI	PEPQ	PES	PET	PI	PP	PPO	PPS	PS	PSO	PTFE2	PUR	PVC	PVDC	PVDF	RUBB
11	DR042820HA32	51	4	Fiber	585	T-Polymer2	Epoxy	EPX	Epoxy Adhesives Transmission (Microscope)	D	Del Rio	585	Del Rio	1	1	7	4	1	1	3	1	1	3	5	2	1	1	1	1	50	1	2	4	2	1	1	4	3	1	1	3	2	1	1	1	1	1	2	4
12	DR042820HA32	52	5	Fragment	635	T-Polymer2	T_PhenoxyResin	HRB	Phenoxy Resin Transmission(Microscope)	D	Del Rio	635	Count	1	2	3	4	5	6	7	8	9	10	11	12	13	14	15	16	17	18	19	20	21	22	23	24	25	26	27	28	29	30	31	32	33	34	35	36
13	DR042820HA32	53	6	Fragment	632	ATR-Polymer2	D_PC	PC	Polycarbonate(PC) DuraSamplIR-II	D	Del Rio	632
14	DR042820HA32	54	7	Fragment	625	T-Polymer2	PC	PC	Polycarbonate(PC) Transmission(Microscope)	D	Del Rio	625
15	DR042820HA32	55	8	Fiber	593	ATR-Polymer2	D_PI1	PI	Polyimide(UPILEX) DuraSamplIR-II	D	Del Rio	593
16	DR042820HA32	56	9		599	IRs Polymer2	RAMIE		Ramie FiberATR/diamond ATRcorrected	D	Del Rio	599	Row Labels	ARA	BR3	DLTDP	EPX	EVA	FEP	HDPE	HERB	HLAS	IIR	LDPE	LS770	MEL	NYL	PA	PAC	PAM	PAR	PBT	PC	PDI	PEEK	PEG	PEI	PEPQ	PES	PET	PETG	PHSI	PI	PIB	PIP	PMP	POM	PP	PPO
17	DR042820HA32	57	10	Fragment	698	ATR-Polymer2	D_PC	PC	Polycarbonate(PC) DuraSamplIR-II	D	Del Rio	698	Uvalde	1	7	3	19	1	2	1	1	1	1	2	3	1	2	13	1	1	2	1	37	1	1	5	1	2	2	1	2	1	8	1	1	2	1	3	1
18	DR042820HA32	58	11	Fragment	603	ATR-Polymer2	D_PC-PBT	PC	Polycarbonate/Polybutylene Terephthalate(PC/PBT) DuraSamplIR-II	D	Del Rio	603	Count	1	2	3	4	5	6	7	8	9	10	11	12	13	14	15	16	17	18	19	20	21	22	23	24	25	26	27	28	29	30	31	32	34	35	36	37
19	DR042820HA32	59	12	Fragment	626	ATR-Polymer2	D_Epoxy5	EPX	Epoxy Resin DuraSamplIR-II	D	Del Rio	626
20	DR042820HA32	60	13	Fiber	598	IRs Polymer2	PB	PBT	PolybuteneATR/diamond ATRcorrected	D	Del Rio	598
21	DR042820HA32	61	14	Fragment	613	T-Polymer2	PC	PC	Polycarbonate(PC) Transmission(Microscope)	D	Del Rio	613
22	DR042820HA32	62	15	Film	590	IRs Polymer2	PPS	PPS	PPS Film	D	Del Rio	590
23	DR041120HD03	1	1	Fragment	605	ATR-Polymer2	D_PVDF	PVDF	Polyvinylindene Fluoride(PVDF) DuraSamplIR-II	D	Del Rio	605
24	DR041120HD03	3	3	Fragment	626	ATR-Polymer2	D_PC	PC	Polycarbonate(PC) DuraSamplIR-II	D	Del Rio	626
25	DR041120HD03	4	4	Fragment	596	T-Polymer2	High-trans Polybutadiene	RUBB	High-trans Butadiene Rubber(High-trans Polybutadiene) Transmission(Microscope)	D	Del Rio	596
26	DR041120HD03	5	5	Fragment	632	ATR-Polymer2	D_PC	PC	Polycarbonate(PC) DuraSamplIR-II	D	Del Rio	632
27	DR041120HD03	6	6	Fragment	625	ATR-Polymer2	D_PC	PC	Polycarbonate(PC) DuraSamplIR-II	D	Del Rio	625
28	DR041120HD03	7	7	Fragment	640	T-Polymer2	T_PC2	PC	Polycarbonate(PC) Transmission(Microscope)	D	Del Rio	640
29	DR041120HD03	8	8	Fragment	623	ATR-Polymer2	D_PC	PC	Polycarbonate(PC) DuraSamplIR-II	D	Del Rio	623
30	DR041120HD03	9	9	Fragment	618	ATR-Polymer2	D_PC	PC	Polycarbonate(PC) DuraSamplIR-II	D	Del Rio	618
31	DR041120HD03	11	11	Fragment	620	ATR-Polymer2	D_Additive2	PA	Polymer Additive(Irganox 1076) DuraSamplIR-II	D	Del Rio	620
32	DR041120HD03	12	12	Fragment	718	IRs Polymer2	LANOLINE	PC	LanolineFilm	D	Del Rio	718
33	DR041120HD03	13	13	Fragment	609	ATR-Polymer2	D_PTFE2	PTFE2	Poly(Tetrafluoroethylene) DuraSamplIR-II	D	Del Rio	609
34	DR041120HD03	14	14	Fragment	615	T-Polymer2	PC	PC	Polycarbonate(PC) Transmission(Microscope)	D	Del Rio	615
35	DR041120HE02	59	1	Fragment	659	T-Polymer2	T_PC2	PC	Polycarbonate(PC) Transmission(Microscope)	D	Del Rio	659
36	DR041120HE02	60	2	Fragment	596	IRs Polymer2	PETG-20	PEG	POLYETHYLENE GLYCOLORIGIN Date: 92/04/09 File: PETG-20.DXINFRARED SPECTROPHOTOMETER FTIR-8000 SERIES	D	Del Rio	596
37	DR041120HE02	61	3	Fragment	606	ATR-Polymer2	D_1_2_Polybutadiene	BR3	1,2-Polybutadiene DuraSamplIR-II	D	Del Rio	606
38	DR041120HE02	62	4	Fragment	621	T-Polymer2	Silicon Grease	SI	Silicon Grease Transmission(Microscope)	D	Del Rio	621
39	DR041120HE02	63	5	Fragment	635	T-Polymer2	PC	PC	Polycarbonate(PC) Transmission(Microscope)	D	Del Rio	635
40	DR041120HE02	64	6	Fiber	576	ATR-Polymer2	D_Polyethyleneglycol	PEG	Polyethylene Glycol 20000 Dura Sampl IR-II	D	Del Rio	576
41	DR041120HE02	65	7	Fragment	695	ATR-Polymer2	D_PC2	PC	Polycarbonate(PC) DuraSamplIR-II	D	Del Rio	695
42	DR041120HE02	66	8	Fragment	708	ATR-Polymer2	D_PC	PC	Polycarbonate(PC) DuraSamplIR-II	D	Del Rio	708
43	DR041120HE02	67	9	Fragment	644	T-Polymer2	PC	PC	Polycarbonate(PC) Transmission(Microscope)	D	Del Rio	644
44	DR041120HE02	68	10	Fragment	575	IRs Polymer2	URETHAN	PUR	Polyurethane Form ATR/ZnSe ATR corrected	D	Del Rio	575
45	DR041120HE02	69	11	Fiber	577	ATR-Polymer2	D_ButylMethacrylate_IsobutylMethacrylate	BMC	Butyl Methacrylate/Isobutyl Methacrylate Copolymer (50:50) Dura Sampl IR-II	D	Del Rio	577
46	DR041120HE02	70	12	Film	592	IRs Polymer2	PEI	PEI	Poly etherimideFilm	D	Del Rio	592
47	DR041120HG02	50	1	Fragment	598	ATR-Polymer2	D_PC2	PC	Polycarbonate(PC) DuraSamplIR-II	D	Del Rio	598
48	DR041120HG02	51	2	Film	601	IRs Polymer2	PEEK	PEEK	PEEKFilm	D	Del Rio	601
49	DR041120HG02	52	3	Sphere	589	T-Polymer2	Silicon Grease	SI	Silicon Grease Transmission (Microscope)	D	Del Rio	589
50	DR041120HG02	53	4	Fiber	586	ATR-Polymer2	D_Poly_1_Butene	PB1	Poly (1-Butene), Isotactic Dura Sampl IR-II	D	Del Rio	586
51	DR041120HG02	54	5		590	IRs Polymer2	RAMIE		Ramie Fiber ATR/diamond ATRcorrected	D	Del Rio	590
52	DR041120HG02	55	6	Fiber	569	T-Polymer2	PEEK	PEEK	Polyetheretherketone (PEEK) Transmission (Microscope)	D	Del Rio	569
53	DR041120HG02	56	7	Fragment	600	IRs Polymer2	PETG-20	PEG	POLYETHYLENE GLYCOLORIGIN Date: 92/04/09 File: PETG-20.DXINFRARED SPECTROPHOTOMETER FTIR-8000 SERIES	D	Del Rio	600
54	DR041120HG02	57	8	Fragment	605	IRs Polymer2	SILICO2	SI	Silicone rubberATR/diamond ATRcorrected	D	Del Rio	605
55	DR041120HG02	58	9	Fragment	649	T-Polymer2	T_PC2	PC	Polycarbonate(PC) Transmission(Microscope)	D	Del Rio	649
56	DR041120HG02	59	10	Fragment	619	T-Polymer2	T_PC2	PC	Polycarbonate(PC) Transmission(Microscope)	D	Del Rio	619
57	DR041120HG06	5	1	Fiber	580	ATR-Polymer2	D_IR-cis	RUBB	cis-Polyisoprene Rubber (IR-cis) Dura Sampl IR-II	D	Del Rio	580
58	DR041120HG06	6	3	Fiber	586	IRs Polymer2	BUTYL_RB	RUBB	Butyl rubber with salt (salt:1540,1016,876cm-1) ATR/diamond ATR corrected	D	Del Rio	586
59	DR041120HG06	7	4	Fiber	584	ATR-Polymer2	D_PI3	PI	Polyimide (Electronic Parts) Dura Sampl IR-II	D	Del Rio	584	637
60	DR041120HG06	8	5	Fragment	696	T-Polymer2	PC	PC	Polycarbonate(PC) Transmission(Microscope)	D	Del Rio	696		Count of Type	Column Labels					Count of Abbreviation	Column Labels
61	DR041120HG06	9	6	Fragment	590	T-Polymer2	PC	PC	Polycarbonate (PC) Transmission(Microscope)	D	Del Rio	590		Row Labels	Fiber	Film	Fragment	Grand Total		Row Labels	ACR	ARA	BMC	BR3	DLTDP	EPX	EVA	FEP	HDPE	HERB	HLAS	HRB	IIR	LDPE	LS770	MEL	NYL	PA	PAC	PAM	PAP	PAR	PB1	PBT	PC	PCL	PDI	PEEK	PEG
62	DR041120HG06	10	7	Fragment	644	ATR-Polymer2	D_PC	PC	Polycarbonate(PC) DuraSamplIR-II	D	Del Rio	644		Del Rio	34	5	85	124		Fiber	1		1	8	1	3			1						2		1	5		1			1	1	3	1	1	2	5
63	DR041120HG06	11	8	Fragment	582	ATR-Polymer2	D_Polyamide6	NYL	Polyamide (Nylon 12) Dura Sampl IR-II	D	Del Rio	582		Uvalde	34	14	115	163		Del Rio	1		1	5		2			1									2					1	1	2	1		1	1
64	DR041120HG06	12	9	Fragment	607	T-Polymer2	Polyacetylene	PAC	Polyacetylene Transmission(Microscope)	D	Del Rio	607		Grand Total	68	19	200	287		Uvalde				3	1	1									2		1	3		1					1		1	1	4
65	DR041120HG06	20	10	Fiber	596	ATR-Polymer2	D_PES	PES	Polyethersulfone(PES) DuraSamplIR-II	D	Del Rio	596								Film														2			1											1
66	DR041120HG06	21	11	Fiber	585	ATR-Polymer2	D_PVDF	PVDF	Polyvinylindene Fluoride (PVDF) Dura Sampl IR-II	D	Del Rio	585								Del Rio																												1
67	DR041120HG06	1	12	Fragment	580	T-Polymer2	T_PhenoxyResin	HRB	Phenoxy Resin Transmission (Microscope)	D	Del Rio	580								Uvalde														2			1
68	DR041120HG06	20	14	Fragment	582	T-Polymer2	Styrene-Ethylene-Butylene	STR	Styrene-Ethylene-Butylene Transmission (Microscope)	D	Del Rio	582								Fragment		1		6	2	20	1	2	1	1	2	3	1	1	2	1	2	13	3	1	1	2		1	84				4
69	DR041120HG06	21	15	Fragment	603	ATR-Polymer2	D_PC	PC	Polycarbonate(PC) DuraSamplIR-II	D	Del Rio	603								Del Rio				2		2					1	3		1	1		2	3	2	1	1				48				3
70	DR041120HG06	22	16	Fragment	588	ATR-Polymer2	D_PC2	PC	Polycarbonate (PC) DuraSamplIR-II	D	Del Rio	588								Uvalde		1		4	2	18	1	2	1	1	1		1		1	1		10	1			2		1	36				1
71	DR041120HG06	21	17	Fragment	601	T-Polymer2	T_PhenoxyResin	HRB	Phenoxy Resin Transmission(Microscope)	D	Del Rio	601								Sphere
72	DR041120HG06	25	18	Fragment	647	T-Polymer2	PC	PC	Polycarbonate(PC) Transmission(Microscope)	D	Del Rio	647								Del Rio
73	DR041120HG06	26	19	Fragment	592	T-Polymer2	PC	PC	Polycarbonate(PC) Transmission(Microscope)	D	Del Rio	592								Grand Total	1	1	1	14	3	23	1	2	2	1	2	3	1	3	4	1	4	18	3	2	1	2	1	2	87	1	1	3	9
74	DR041120HG06	27	20	Fragment	663	IRs Polymer2	VLDPE	LDPE	Low Density PolyethyleneFilm	D	Del Rio	663																Sphere
75	DR041120HG06	28	21	Fragment	611	T-Polymer2	T_1_2_Polybutadiene	BR3	1,2-Polybutadiene Transmission(Microscope)	D	Del Rio	611
76	DR041120HJ03	44	1	Fiber	589	IRs Polymer2	BR3	BR3	Polybutadiene High-trans Film	D	Del Rio	589
77	DR041120HJ03	45	2	Fiber	591	ATR-Polymer2	D_Styrene_Maleic_Anhydride	SMA	Styrene/Maleic Anhydride Copolymer (50/50 Copolymer) DuraSamplIR-II	D	Del Rio	591
78	DR041120HJ03	46	3	Fragment	580	IRs Polymer2	NYLON6	NYL	Nylon 6 ATR/diamond ATR corrected	D	Del Rio	580
79	DR041120HJ03	47	4	Fragment	582	IRs Polymer2	SanolLS770	LS770	Sanol LS770 HINDERED AMINE LIGHT STABILIZERBIS (2,2,6,6-TETRAMETHYL-4-PIPERIDYL) SEBACATE C28H52N2O4 CAS NO. 52829-07-9 ATR/diamond ATR corrected	D	Del Rio	582
80	DR041120HJ03	48	5	Film	591	IRs Polymer2	PEI	PEI	Polyetherimide Film	D	Del Rio	591
81	DR041120HJ03	49	6	Fragment	645	ATR-Polymer2	D_PC	PC	Polycarbonate(PC) DuraSamplIR-II	D	Del Rio	645		Chi Square Analysis
82	DR041120HJ03	50	7	Fragment	587	T-Polymer2	PEG	PEG	Polyethylene Glycol 20000 Transmission (Microscope)	D	Del Rio	587
83	DR041120HJ28	1	1	Fiber	570	T-Polymer2	T_HDPE	HDPE	High Density Polyethylene (HDPE) Transmission (Microscope)	D	Del Rio	570			Column Labels
84	DR041120HJ28	2	2	Fiber	582	T-Polymer2	PC	PC	Polycarbonate (PC) Transmission (Microscope)	D	Del Rio	582		Row Labels	ACR	ARA	BMC	BR3	DLTDP	EPX	EVA	FEP	HDPE	HERB	HLAS	HRB	IIR	LDPE	LS770	MEL	NYL	PA	PAC	PAM	PAP	PAR	PB1	PBT	PC	PCL	PDI	PEEK	PEG	PEI	PEPQ	PES	PET	PETG	PHSI
85	DR041120HJ28	3	3	Fiber	572	IRs Polymer2	EPOXY1	EPX	Epoxy resin (liquid) ATR/diamond ATR corrected	D	Del Rio	572		Del Rio	1		1	7		4			1		1	3		1	1		2	5	2	1	1		1	1	50	1		2	4	2	1	1	4
86	DR041120HJ28	5	4	Fiber	591	IRs Polymer2	P-EPQ	PEPQ	P-EPQANTIOXIDANT PHOSPHONITE COMPOUNDC68H92O4P2CAS NO. ATR/diamond ATRcorrected	D	Del Rio	591		Uvalde		1		7	3	19	1	2	1	1	1		1	2	3	1	2	13	1	1		2		1	37		1	1	5	1	2	2	1	2	1
87	DR041120HJ28	4	5	Film	599	T-Polymer2	Polyester	PET	Polyester Film(TOYOBO ESTER FILM & ESPET FILM) Transmission(Microscope)	D	Del Rio	599		Grand Total	1	1	1	14	3	23	1	2	2	1	2	3	1	3	4	1	4	18	3	2	1	2	1	2	87	1	1	3	9	3	3	3	5	2	1
88	DR041120HM01	82	1	Fragment	628	ATR-Polymer2	D_PC	PC	Polycarbonate(PC) DuraSamplIR-II	D	Del Rio	628
89	DR041120HM01	83	2	Fiber	579	T-Polymer2	Polyester	PET	Polyester Film (TOYOBO ESTER FILM & ESPET FILM) Transmission (Microscope)	D	Del Rio	579		Observed
90	DR041120HM01	84	3	Fragment	626	ATR-Polymer2	D_PVC with PhenoricSulfonicEster	PC	Polyvinylchloride with Phenolic ester of aliphatic sulfonic acid DuraSampllR	D	Del Rio	626			Combined 1	BR3	EPX	Combined 2	PA	Combined 3	PC	PEG	Combined 4	PI	PLT	Combined 5	PPS	Combined 6	Grand Total
91	DR041120HM01	85	4	Fragment	591	ATR-Polymer2	D_Additive4	PA	Polymer Additive(Irganox MD1024) DuraSamplIR-II	D	Del Rio	591		Del Rio	7	7	4	9	5	7	50	4	5	3	5	6	3	14	129
92	DR041120HM01	86	5	Fragment	595	IRs Polymer2	Chimassorb944LD	HLAS	Chimassorb 944LDHINDERED AMINE LIGHT STABILIZER (POLYMERIC)CAS NO. 71878-19-8ATR/diamond ATRcorrected	D	Del Rio	595		Uvalde	10	7	19	13	13	6	37	5	8	8	1	13	9	15	164
93	DR041120HM01	87	6	Fragment	607	ATR-Polymer2	D_Polysulfone	PSO	Polysulfone DuraSamplIR-II	D	Del Rio	607		Grand Total	17	14	23	22	18	13	87	9	13	11	6	19	12	29	293
94	DR041120HM01	88	7	Fiber	594	T-Polymer2	T_1_2_Polybutadiene	BR3	1,2-Polybutadiene Transmission(Microscope)	D	Del Rio	594
95	DR041120HM01	89	8	Fragment	615	ATR-Polymer2	D_PPS2	PPS	Poly(Phenylene Sulfide) DuraSamplIR-II	D	Del Rio	615		Expected
96	DR041120HM01	90	9	Fragment	587	T-Polymer2	Epoxy7	EPX	Epoxy Resin Transmission (Microscope)	D	Del Rio	587			Combined 1	BR3	EPX	Combined 2	PA	Combined 3	PC	PEG	Combined 4	PI	PLT	Combined 5	PPS	Combined 6	Grand Total
97	DR041120HM01	91	10	Fiber	588	ATR-Polymer2	D_Polyester4	PET	Polyester Film (TOYOBO ESTER FILM & ESPET FILM) DuraSampl IR-II	D	Del Rio	588		Del Rio	7.48464	6.16382	10.1263	9.68601	7.92491	5.72355	38.3038	3.96246	5.72355	4.843	2.64164	8.36519	5.28328	12.7679	129	129
98	DR041120HM01	92	11	Fragment	651	T-Polymer2	PC	PC	Polycarbonate(PC) Transmission(Microscope)	D	Del Rio	651		Uvalde	9.51536	7.83618	12.8737	12.314	10.0751	7.27645	48.6962	5.03754	7.27645	6.157	3.35836	10.6348	6.71672	16.2321	164	164
99	DR041120HR01	14	1	Fiber	587	T-Polymer2	T_1_2_Polybutadiene	BR3	1,2-Polybutadiene Transmission (Microscope)	D	Del Rio	587		Grand Total	17	14	23	22	18	13	87	9	13	11	6	19	12	29	293
100	DR041120HR01	15	2	Fragment	621	IRs Polymer2	PC	PC	Polycarbonate/CD-ROMATR/diamond ATRcorrected	D	Del Rio	621		Check	17	14	23	22	18	13	87	9	13	11	6	19	12	29	293
101	DR041120HR01	16	3	Fiber	570	T-Polymer2	PS	PS	Polystyrene(PS) Transmission (Microscope)	D	Del Rio	570
102	DR041120HR01	17	4	Fragment	632	T-Polymer2	PC	PC	Polycarbonate(PC) Transmission(Microscope)	D	Del Rio	632
103	DR041120HR01	18	5	Fragment	729	T-Polymer2	PC	PC	Polycarbonate(PC) Transmission(Microscope)	D	Del Rio	729		Chi Square
104	DR041120HR01	19	6	Fiber	591	ATR-Polymer2	D_PolyethyleneOxide	PPO	Poly (Ethylene Oxide) DuraSamplIR-II	D	Del Rio	591			Combined 1	BR3	EPX	Combined 2	PA	Combined 3	PC	PEG	Combined 4	PI	PLT	Combined 5	PPS	Combined 6	Grand Total
105	DR041120HR01	20	7	Fragment	703	T-Polymer2	PC	PC	Polycarbonate(PC) Transmission(Microscope)	D	Del Rio	703		Del Rio	0.0313813	0.113435	3.70633	0.0485861	1.07952	0.284671	3.57151	0.000355701	0.0914684	0.701354	2.10546	0.668737	0.986765	0.118894
106	DR041120HR01	21	8	Fiber	656	T-Polymer2	T_PC2	PC	Polycarbonate(PC) Transmission(Microscope)	D	Del Rio	656		Uvalde	0.024684	0.0892263	2.91534	0.0382171	0.849137	0.223918	2.8093	0.000279789	0.0719477	0.551675	1.65613	0.526019	0.776175	0.0935201
107	DR041120HR01	22	9	Fragment	666	T-Polymer2	PC	PC	Polycarbonate(PC) Transmission(Microscope)	D	Del Rio	666		Chi Square Total															24.134
108	DR041120HR01	23	10	Fragment	603	ATR-Polymer2	D_PC	PC	Polycarbonate(PC) DuraSamplIR-II	D	Del Rio	603		df =	13
109	DR041120HR01	24	11	Fragment	615	T-Polymer2	T_PC2	PC	Polycarbonate(PC) Transmission(Microscope)	D	Del Rio	615		p value =	0.0299193
110	DR041120HR01	25	12	Fragment	647	ATR-Polymer2	D_PC	PC	Polycarbonate(PC) DuraSamplIR-II	D	Del Rio	647		interpretation
111	DR041120HR01	26	13	Fragment	658	T-Polymer2	Paper	PAP	Paper Transmission(Microscope)	D	Del Rio	658
112	DR041120HR01	27	14	Fragment	618	T-Polymer2	PC	PC	Polycarbonate(PC) Transmission(Microscope)	D	Del Rio	618
113	DR041120HR01	28	15		602	ATR-Polymer2	D_Cellulose5		Ramie DuraSamplIR-II	D	Del Rio	602
114	DR041120HR01	24	17	Fiber	578	T-Polymer2	Acrylic Adhesive	ACR	Acrylic Adhesive Transmission (Microscope)	D	Del Rio	578
115	DR041120HR01	25	18	Fiber	593	IRs Polymer2	BR3	BR3	Polybutadiene High-transFilm	D	Del Rio	593	Row Labels	ACR	ARA	BMC	BR3	DLTDP	EPX	EVA	FEP	HDPE	HERB	HLAS	HRB	IIR	LDPE	LS770	MEL	NYL	PA	PAC	PAM	PAP	PAR	PB1	PBT	PC	PCL	PDI	PEEK	PEG	PEI	PEPQ	PES	PET	PETG	PHSI	PI
116	DR041120HR01	29	19	Fiber	589	T-Polymer2	PP	PP	Polypropylene (PP) Transmission (Microscope)	D	Del Rio	589		1	1	1	14	3	23	1	2	2	1	2	3	1	3	4	1	5	18	3	2	1	2	1	2	87	1	1	3	9	3	3	3	5	2	1	11
117	DR041120HT03	70	1		768	T-Polymer2	Soy Bean Powder		Protein(Soy Bean Powder) Transmission(Microscope)	D	Del Rio	768
118	DR041120HT03	71	2	Fragment	618	T-Polymer2	PPS	PPS	Polyphenylene Sulfie(PPS) Transmission(Microscope)	D	Del Rio	618
119	DR041120HT03	72	3	Fragment	588	T-Polymer2	Irganox 1330	PA	Polymer Additive (Irganox 1330) Transmission (Microscope)	D	Del Rio	588
120	DR041120HT03	73	4	Fragment	641	T-Polymer2	Polyacetylene	PAC	Polyacetylene Transmission(Microscope)	D	Del Rio	641
121	DR041120HT03	74	5	Fragment	595	ATR-Polymer2	D_PVC with TerephthalicEster	PVC	Polyvinylchloride with BIS(2-Ehylhexyl)Terephthalate DuraSampllR	D	Del Rio	595
122	DR041120HT03	75	6	Fragment	657	IRs Polymer2	PC	PC	Polycarbonate/CD-ROMATR/diamond ATRcorrected	D	Del Rio	657
123	DR041120HT03	76	7	Fragment	656	IRs Polymer2	NY-MXD6	NYL	Nylon MXD6Film	D	Del Rio	656
124	DR041120HT03	77	8	Fiber	580	ATR-Polymer2	D_Polycaprolactone	PCL	Polycaprolactone Dura Sampl IR-II	D	Del Rio	580
125	DR041120HT03	78	9	Fragment	638	T-Polymer2	PC	PC	Polycarbonate(PC) Transmission(Microscope)	D	Del Rio	638
126	DR041120HT03	79	10	Fragment	645	ATR-Polymer2	D_PC	PC	Polycarbonate(PC) DuraSamplIR-II	D	Del Rio	645
127	DR041120HT03	80	11	Fiber	569	T-Polymer2	High-trans Polybutadiene	BR3	High-trans Butadiene Rubber (High-trans Polybutadiene) Transmission (Microscope)	D	Del Rio	569
128	DR041120HT03	81	12	Fiber	579	IRs Polymer2	Irganox1010	PA	Irganox 1010 ANTIOXIDANT (Phenol) C73H108O12 CAS NO. 6683-19-8 ATR/diamond ATR corrected	D	Del Rio	579
129	DR041120HT03	82	13	Fragment	595	IRs Polymer2	PVDC	PVDC	PVDC,Poly (vinylidene chloride) /wlap filmATR/diamond ATRcorrected	D	Del Rio	595
130	UV042821HA04	29	1	Fragment	593	T-Polymer2	Epoxy	EPX	Epoxy Resin Transmission(Microscope)	U	Uvalde	593
131	UV042821HA04	30	3	Fiber	578	ATR-Polymer2	D_PTFE2	PTFE2	Poly (Tetrafluoroethylene) Dura Sampl IR-II	U	Uvalde	578
132	UV042821HA04	31	4	Fragment	606	ATR-Polymer2	D_Polybuten	PIB	Polybuten DuraSamplIR-II	U	Uvalde	606
133	UV042821HA04	32	5	Fragment	573	ATR-Polymer2	D_Additive1	PA	Polymer Additive (Irganox 1010) Dura Sampl IR-II	U	Uvalde	573
134	UV042821HA04	33	6	Fragment	664	T-Polymer2	PC	PC	Polycarbonate(PC) Transmission(Microscope)	U	Uvalde	664
135	UV042821HA04	34	7	Fragment	702	ATR-Polymer2	D_PC	PC	Polycarbonate(PC) DuraSamplIR-II	U	Uvalde	702
136	UV042821HA04	35	8	Fragment	664	IRs Polymer2	PC	PC	Polycarbonate/CD-ROMATR/diamond ATRcorrected	U	Uvalde	664
137	UV042821HA04	36	9	Fragment	660	T-Polymer2	PC	PC	Polycarbonate(PC) Transmission(Microscope)	U	Uvalde	660
138	UV042821HA04	37	10	Fragment	619	IRs Polymer2	MELAMIN	MEL	Melamin FormATR/diamond ATRcorrected	U	Uvalde	619
139	UV042821HA04	38	11	Fragment	642	T-Polymer2	PC	PC	Polycarbonate(PC) Transmission(Microscope)	U	Uvalde	642
140	UV042821HA04	39	12	Fragment	637	T-Polymer2	PC	PC	Polycarbonate(PC) Transmission(Microscope)	U	Uvalde	637
141	UV042821HA04	40	13	Fragment	629	T-Polymer2	PC	PC	Polycarbonate(PC) Transmission(Microscope)	U	Uvalde	629
142	UV042821HA04	41	14	Fragment	641	ATR-Polymer2	D_PC	PC	Polycarbonate(PC) DuraSamplIR-II	U	Uvalde	641
143	UV042821HA04	42	15		652	T-Polymer2	Ramie		Ramie Transmission(Microscope)	U	Uvalde	652
144	UV042821HA04	43	16	Fiber	584	ATR-Polymer2	D_Polyethyleneglycol	PEG	Polyethylene Glycol 20000 Dura Sampl IR-II	U	Uvalde	584
145	UV042821HA04	44	17	Fragment	677	ATR-Polymer2	D_PC	PC	Polycarbonate(PC) DuraSamplIR-II	U	Uvalde	677
146	UV042821HA04	45	18	Fragment	654	T-Polymer2	PC	PC	Polycarbonate(PC) Transmission(Microscope)	U	Uvalde	654
147	UV042821HA04	46	19	Fragment	637	T-Polymer2	PC	PC	Polycarbonate(PC) Transmission(Microscope)	U	Uvalde	637			Row Labels	Fiber	Film	Fragment	Sphere	Grand Total
148	UV042821HA04	47	20	Fragment	634	T-Polymer2	FEP	FEP	Tetrafluoroethylene-Hexafluoropropylene(FEP) Transmission(Microscope)	U	Uvalde	634			Del Rio	34	5	85	1	125
149	UV042821HA04	48	21	Fiber	581	ATR-Polymer2	D_1_2_Polybutadiene	BR3	1,2-Polybutadiene Dura Sampl IR-II	U	Uvalde	581			Uvalde	34	14	115	0	163
150	UV042821HA05	28	1	Fiber	607	ATR-Polymer2	D_PPS	PPS	Polyphenylene Sulfide(PPS) DuraSamplIR-II	U	Uvalde	607			Grand Total	68	19	200	1	288
151	UV042821HA05	29	2	Fiber	579	T-Polymer2	PPS	PPS	Polyphenylene Sulfie (PPS) Transmission (Microscope)	U	Uvalde	579
152	UV042821HA05	30	3	Fiber	590	IRs Polymer2	DLTDP	DLTDP	DLTDPANTIOXIDANT (CONTAINING SULFUR)DILAURYL THIODIPROPIONATE C30H58O4S CAS NO. 123-28-4 ATR/diamond ATR corrected	U	Uvalde	590
153	UV042821HA05	30	4	Fiber	575	ATR-Polymer2	D_Polyethyleneglycol	PEG	Polyethylene Glycol 20000 Dura Sampl IR-II	U	Uvalde	575			Expected Count Assuming Uniform distribution of shapes				72
154	UV042821HA05	31	5	Fiber	577	IRs Polymer2	BUTYL_RB	RUBB	Butyl rubber with salt(salt:1540,1016,876cm-1) ATR/diamond ATR corrected	U	Uvalde	577						Fiber	0.222222
155	UV042821HA05	32	6	Fiber	580	T-Polymer2	Epoxy	EPX	Epoxy Resin (Electronic Parts-3) Transmission (Microscope)	U	Uvalde	580						Film	39.0139
156	UV042821HA05	33	7	Fiber	580	T-Polymer2	T_Polydiallyl_Isophthalate	PDI	Poly (Diallyl Isophthalate) Transmission (Microscope)	U	Uvalde	580						Fragments	227.556
157	UV042821HA05	34	8	Film	586	IRs Polymer2	LLDPE1	LDPE	Low Density Polyethylene Film	U	Uvalde	586						Shpere	70.0139
158	UV042821HA05	35	9	Fragment	609	IRs Polymer2	P-EPQ	PEPQ	P-EPQANTIOXIDANT PHOSPHONITE COMPOUNDC68H92O4P2CAS NO. ATR/diamond ATRcorrected	U	Uvalde	609
159	UV042821HA05	35	11	Fiber	588	ATR-Polymer2	D_PC-PBT	PC	Polycarbonate/Polybutylene Terephthalate (PC/PBT) Dura Sampl IR-II	U	Uvalde	588			Chi Sq is the summation			Summation	336.806
160	UV042821HA05	36	12	Fiber	592	T-Polymer2	PI	PI	Polyimide (Electronic Parts) Transmission(Microscope)	U	Uvalde	592			Significance interval is 5%			p-value	1.07279e-72
161	UV042821HA05	37	13	Fiber	598	ATR-Polymer2	D_Additive3	PA	Polymer Additive(Irganox 1330) DuraSamplIR-II	U	Uvalde	598			degrees of freedom			dof	3
162	UV042821HA05	38	14	Fiber	579	ATR-Polymer2	D_Additive6	LS770	Polymer Additive (Sanol LS770) Dura Sampl IR-II	U	Uvalde	579
163	UV042821HA05	29	16	Fiber	575	IRs Polymer2	PS	PS	Polystyrene ATR/diamond ATR corrected	U	Uvalde	575
164	UV042821HA05	38	18	Fragment	587	ATR-Polymer2	D_Additive4	PA	Polymer Additive (Irganox MD1024) Dura Sampl IR-II	U	Uvalde	587
165	UV042821HA05	39	19	Fragment	667	T-Polymer2	PC	PC	Polycarbonate(PC) Transmission(Microscope)	U	Uvalde	667
166	UV042821HA05	40	20	Fiber	605	ATR-Polymer2	D_PEI	PEI	Polyetherimide(PEI) DuraSamplIR-II	U	Uvalde	605
167	UV042821HA05	41	21	Fragment	582	IRs Polymer2	PHSI	PHSI	Phenylsilicone rubber ATR/diamond ATR corrected	U	Uvalde	582
168	UV042821HA05	42	22	Fragment	718	ATR-Polymer2	D_PC	PC	Polycarbonate(PC) DuraSamplIR-II	U	Uvalde	718
169	UV042821HA05	43	23	Fiber	596	ATR-Polymer2	D_Poly_alpha_Methylstyrene	PAM	Poly(alpha-Methylstyrene) DuraSamplIR-II	U	Uvalde	596
170	UV042821HA05	44	24	Fragment	588	ATR-Polymer2	D_Epoxy6	EPX	Epoxy Adhesives Dura Sampl IR-II	U	Uvalde	588
171	UV042821HA11	117	1	Film	571	IRs Polymer2	PP	PP	Polypropylene Film	U	Uvalde	571
172	UV042821HA11	118	2	Fragment	586	ATR-Polymer2	D_Additive2	PA	Polymer Additive (Irganox 1076) DuraSampl IR-II	U	Uvalde	586
173	UV042821HA11	119	3	Fragment	632	ATR-Polymer2	D_PPS2	PPS	Poly(Phenylene Sulfide) DuraSamplIR-II	U	Uvalde	632
174	UV042821HA11	120	4	Fiber	576	IRs Polymer2	PS	PS	Polystyrene ATR/diamond ATR corrected	U	Uvalde	576
175	UV042821HA11	121	5	Fragment	612	ATR-Polymer2	D_Epoxy1	EPX	Epoxy Resin(Electronic Parts-1) DuraSamplIR-II	U	Uvalde	612
176	UV042821HA11	122	6	Fragment	581	IRs Polymer2	PIP	PIP	Polyisoprene [-CH2CH(CH3)=CHCH2-] n Film	U	Uvalde	581
177	UV042821HA11	123	7	Film	590	IRs Polymer2	PPS	PPS	PPS Film	U	Uvalde	590
178	UV042821HA11	124	8	Fragment	602	T-Polymer2	Epoxy7	EPX	Epoxy Resin Transmission(Microscope)	U	Uvalde	602
179	UV042821HA12	100	1	Fiber	579	T-Polymer2	T_PVC with PhenoricSulfonicEster	PVC	Polyvinylchloride with Phenolic ester of aliphatic sulfonic acid Transmission (Microscope)	U	Uvalde	579
180	UV042821HA12	101	2	Fragment	598	T-Polymer2	PPS	PPS	Polyphenylene Sulfie(PPS) Transmission(Microscope)	U	Uvalde	598
181	UV042821HA12	102	3	Fragment	581	T-Polymer2	Epoxy	EPX	Epoxy Adhesives Transmission (Microscope)	U	Uvalde	581
182	UV042821HA12	103	4	Fragment	592	ATR-Polymer2	D_PVDF	PVDF	Polyvinylindene Fluoride(PVDF) DuraSamplIR-II	U	Uvalde	592
183	UV042821HA12	104	5	Fragment	613	ATR-Polymer2	D_Additive7	HLAS	Polymer Additive(Chimassorb 944LD) DuraSamplIR-II	U	Uvalde	613
184	UV042821HA12	105	6	Fragment	581	T-Polymer2	PAR	PAR	Polyarylate (PAR) Transmission (Microscope)	U	Uvalde	581
185	UV042821HA12	106	7	Fragment	608	ATR-Polymer2	D_PVC with PhthalicEster 1	PVC	Polyvinylchloride with Phthalate DuraSampllR	U	Uvalde	608
186	UV042821HA12	107	8	Fragment	595	T-Polymer2	Irganox 1330	PA	Polymer Additive(Irganox 1330) Transmission(Microscope)	U	Uvalde	595
187	UV042821HA12	108	9	Fragment	682	ATR-Polymer2	D_PC	PC	Polycarbonate(PC) DuraSamplIR-II	U	Uvalde	682
188	UV042821HA12	109	10	Fragment	600	ATR-Polymer2	D_Additive6	LS770	Polymer Additive(Sanol LS770) DuraSamplIR-II	U	Uvalde	600
189	UV042821HA12	110	11	Fragment	592	ATR-Polymer2	D_PI1	PI	Polyimide(UPILEX) DuraSamplIR-II	U	Uvalde	592
190	UV042821HA12	111	12	Fragment	599	T-Polymer2	Epoxy	EPX	Epoxy Adhesives Transmission(Microscope)	U	Uvalde	599
191	UV042821HA12	112	13	Fragment	600	ATR-Polymer2	D_Polyethyleneglycol	PEG	Polyethylene Glycol 20000 DuraSamplIR-II	U	Uvalde	600
192	UV042821HA12	113	14	Fragment	583	T-Polymer2	PVDF	PVDF	Polyvinylidene Fluoride (PVDF) Transmission (Microscope)	U	Uvalde	583
193	UV042821HA12	114	15	Fragment	636	ATR-Polymer2	D_PC	PC	Polycarbonate(PC) DuraSamplIR-II	U	Uvalde	636
194	UV042821HA12	115	16	Fragment	669	T-Polymer2	PC	PC	Polycarbonate(PC) Transmission(Microscope)	U	Uvalde	669
195	UV042821HA12	116	17	Film	599	IRs Polymer2	PPS	PPS	PPS Film	U	Uvalde	599
196	UV042821HA22	51	1	Fragment	603	T-Polymer2	Epoxy	EPX	Epoxy Resin(Electronic Parts-1) Transmission(Microscope)	U	Uvalde	603
197	UV042821HA22	52	2	Fragment	614	ATR-Polymer2	D_PC-PBT	PC	Polycarbonate/Polybutylene Terephthalate(PC/PBT) DuraSamplIR-II	U	Uvalde	614
198	UV042821HA22	53	3	Fragment	690	ATR-Polymer2	D_PC	PC	Polycarbonate(PC) DuraSamplIR-II	U	Uvalde	690
199	UV042821HA22	54	4	Fragment	599	T-Polymer2	T_HDPE	HDPE	High Density Polyethylene(HDPE) Transmission(Microscope)	U	Uvalde	599
200	UV042821HA22	55	5	Film	606	IRs Polymer2	PPS	PPS	PPSFilm	U	Uvalde	606
201	UV042821HA22	56	6	Fiber	589	ATR-Polymer2	D_PolyethyleneOxide	PEG	Poly (Ethylene Oxide) DuraSamplIR-II	U	Uvalde	589
202	UV042821HA22	57	7	Film	692	IRs Polymer2	LANOLINE	WOIL	LanolineFilm	U	Uvalde	692
203	UV042821HA22	58	8	Fragment	624	T-Polymer2	PC	PC	Polycarbonate(PC) Transmission(Microscope)	U	Uvalde	624
204	UV042821HA22	59	9	Fragment	619	ATR-Polymer2	D_PC	PC	Polycarbonate(PC) DuraSamplIR-II	U	Uvalde	619
205	UV042821HA22	60	10	Fragment	606	T-Polymer2	Irganox 1076	PA	Polymer Additive(Irganox 1076) Transmission(Microscope)	U	Uvalde	606
206	UV042821HA22	61	11	Fiber	603	ATR-Polymer2	D_Ht-BR	BR3	High-trans Butadiene Rubber(High-trans Polubutadiene) DuraSamplIR-II	U	Uvalde	603
207	UV042821HA22	62	12	Fiber	589	ATR-Polymer2	D_SB	SB	Styrene/Butadiene (SB) SBS Block Copolymer (Styrene content 30%) Dura SamplIR-II	U	Uvalde	589
208	UV042821HA22	63	13	Fiber	570	ATR-Polymer2	D_PI3	PI	Polyimide (Electronic Parts) Dura Sampl IR-II	U	Uvalde	570
209	UV042821HA22	64	14	Fragment	589	ATR-Polymer2	D_Ht-BR	BR3	High-trans Butadiene Rubber (High-trans Polubutadiene) DuraSamplIR-II	U	Uvalde	589
210	UV042821HA31	1	1	Fiber	578	ATR-Polymer2	D_PI2	PI	Polyimide (KAPTON) Dura Sampl IR-II	U	Uvalde	578
211	UV042821HA31	2	2	Fragment	640	T-Polymer2	PC	PC	Polycarbonate(PC) Transmission(Microscope)	U	Uvalde	640
212	UV042821HA31	3	3	Fragment	587	ATR-Polymer2	D_Poly_4_Methyl_1_Pentene	PMP	Poly (4-Methyl-1 Pentene) Dura Sampl IR-II	U	Uvalde	587
213	UV042821HA31	4	4	Fragment	605	T-Polymer2	PPS	PPS	Polyphenylene Sulfie(PPS) Transmission(Microscope)	U	Uvalde	605
214	UV042821HA31	5	5	Film	582	IRs Polymer2	PP	PP	Polypropylene Film	U	Uvalde	582
215	UV042821HA31	5	6	Fiber	583	ATR-Polymer2	D_Additive1	PA	Polymer Additive (Irganox 1010) Dura Sampl IR-II	U	Uvalde	583
216	UV042821HA31	6	7	Fragment	628	ATR-Polymer2	D_Epoxy1	EPX	Epoxy Resin(Electronic Parts-1) DuraSamplIR-II	U	Uvalde	628
217	UV042821HA31	7	8	Fiber	576	T-Polymer2	PPS	PPS	Polyphenylene Sulfie (PPS) Transmission (Microscope)	U	Uvalde	576
218	UV042821HA31	8	9	Fragment	601	ATR-Polymer2	D_PI2	PI	Polyimide(KAPTON) DuraSamplIR-II	U	Uvalde	601
219	UV042821HA31	9	10	Fragment	578	T-Polymer2	IR-trans	RUBB	trans-Polyisoprene Rubber (IR-trans) Transmission (Microscope)	U	Uvalde	578
220	UV042821HA31	10	11	Fragment	595	IRs Polymer2	IrganoxMD1024	PA	Irganox MD1024 HINDERED PHENOLIC ANTIOXIDANT-METAL DEACTIVATOR1,2-BIS(3,5-DI-tert-BUTYL-4-HYDROXYHYDROCINNAMOYL)HYDRAZINE; HINDERED PHENOLC34H52O4N2CAS NO. 32687-78-8ATR/diamond ATRcorrected	U	Uvalde	595
221	UV042821HA31	11	12	Fragment	629	T-Polymer2	PC	PC	Polycarbonate(PC) Transmission(Microscope)	U	Uvalde	629
222	UV042821HA31	12	13	Fragment	597	IRs Polymer2	DLTDP	DLTDP	DLTDPANTIOXIDANT (CONTAINING SULFUR)DILAURYL THIODIPROPIONATEC30H58O4SCAS NO. 123-28-4ATR/diamond ATRcorrected	U	Uvalde	597
223	UV042821HA31	13	14	Fragment	588	ATR-Polymer2	D_Additive3	PA	Polymer Additive (Irganox 1330) Dura Sampl IR-II	U	Uvalde	588
224	UV042821HA31	14	15	Fragment	590	IRs Polymer2	PC	PC	Polycarbonate/CD-ROMATR/diamond ATRcorrected	U	Uvalde	590
225	UV042821HA31	15	16	Fragment	600	T-Polymer2	Epoxy7	EPX	Epoxy Resin Transmission(Microscope)	U	Uvalde	600
226	UV042821HA31	16	17	Fragment	598	T-Polymer2	T_1_2_Polybutadiene	BR3	1,2-Polybutadiene Transmission(Microscope)	U	Uvalde	598
227	UV042821HA31	17	18	Fragment	606	ATR-Polymer2	D_Polyisoprene_Chlorinated	RUBB	Polyisoprene, Chlorinated(Chlorine content 65%) DuraSamplIR-II	U	Uvalde	606
228	UV042821HA31	18	19	Fragment	602	T-Polymer2	T_PhenoxyResin	HERB	Phenoxy Resin Transmission(Microscope)	U	Uvalde	602
229	UV042821HA34	62	1	Fragment	600	ATR-Polymer2	D_Additive3	PA	Polymer Additive(Irganox 1330) DuraSamplIR-II	U	Uvalde	600
230	UV042821HA34	63	2	Fragment	613	ATR-Polymer2	D_Epoxy7	EPX	Epoxy Resin DuraSamplIR-II	U	Uvalde	613
231	UV042821HA34	64	3	Fiber	564	ATR-Polymer2	D_Additive6	LS770	Polymer Additive (Sanol LS770) Dura Sampl IR-II	U	Uvalde	564
232	UV042821HA34	65	4	Fragment	597	ATR-Polymer2	D_POM2	POM	Polyacetal(Electronic Parts-2) DuraSamplIR-II	U	Uvalde	597
233	UV042821HA34	66	5	Fragment	694	ATR-Polymer2	D_PC	PC	Polycarbonate(PC) DuraSamplIR-II	U	Uvalde	694
234	UV042821HA34	67	6	Film	608	IRs Polymer2	SBS	SBS	SBSFilm	U	Uvalde	608
235	UV042821HA34	68	7	Fiber	572	T-Polymer2	Silicon Grease	SI	Silicon Grease Transmission (Microscope)	U	Uvalde	572
236	UV042821HA34	69	8	Fiber	592	IRs Polymer2	PETG-20	PEG	POLYETHYLENE GLYCOLORIGIN Date: 92/04/09 File: PETG-20.DXINFRARED SPECTROPHOTOMETER FTIR-8000 SERIES	U	Uvalde	592
237	UV042821HA34	70	9	Fragment	591	T-Polymer2	Epoxy	EPX	Epoxy Resin (Electronic Parts-2) Transmission(Microscope)	U	Uvalde	591
238	UV042821HA34	71	10	Fragment	587	ATR-Polymer2	D_IIR	IIR	IIR (Isobutylene-Isoprene Rubber) Dura Sampl IR-II	U	Uvalde	587
239	UV042821HA34	72	11	Fragment	586	ATR-Polymer2	D_Polysulfone	PSO	Polysulfone Dura Sampl IR-II	U	Uvalde	586
240	UV042821HA34	73	12	Fragment	606	ATR-Polymer2	D_IR-trans	RUBB	trans-Polyisoprene Rubber(IR-trans) DuraSamplIR-II	U	Uvalde	606
241	UV042821HA34	74	13	Fragment	581	IRs Polymer2	PETG	PETG	Polyethylene glycol ORIGIN Date: 92/03/27 File: PETG.DX INFRARED SPECTROPHOTOMETER FTIR-8000 SERIES	U	Uvalde	581
242	UV042821HA34	75	14	Fragment	590	T-Polymer2	T_EVA-6	EVA	Ethylene/Vinyl Acetate (EVA) Copolymer (Vinyl Acetate content 40%) Transmission (Microscope)	U	Uvalde	590
243	UV042821HA34	76	15	Fiber	577	IRs Polymer2	Irganox1330	PA	Irganox 1330 ANTIOXIDANT (Penol) C54H78O31,3,5-TRIMETHYL-2,4,6-TRIS (3,5-DI-tert-BUTYL-4-HYDROXYBENZYL)BENZENE CAS NO. 1709-70-2 ATR/diamond ATR corrected	U	Uvalde	577
244	UV042821HA46	35	1	Fiber	584	IRs Polymer2	PVDC	PVC	PVDC, Poly (vinylidene chloride) /wlap film ATR/diamond ATR corrected	U	Uvalde	584
245	UV042821HA46	36	2	Film	566	IRs Polymer2	PES	PES	PES Film	U	Uvalde	566
246	UV042821HA46	37	3	Fragment	585	ATR-Polymer2	D_PP_Chlorinated	PP	Polypropylene, Chlorinated (Chlorine content 65%) Dura Sampl IR-II	U	Uvalde	585
247	UV042821HA46	38	4	Fragment	580	IRs Polymer2	P-EPQ	PEPQ	P-EPQANTIOXIDANT PHOSPHONITE COMPOUNDC68H92O4P2CAS NO. ATR/diamond ATRcorrected	U	Uvalde	580
248	UV042821HA46	39	5	Fragment	591	ATR-Polymer2	D_PPO-PA	PPO	Polyphenylene Oxide (Polyphenylene Ether)/Polyamide (PPO/PA NORYL) DuraSamplIR-II	U	Uvalde	591
249	UV042821HA46	40	6	Fragment	604	T-Polymer2	Irganox MD1024	PA	Polymer Additive(Irganox MD1024) Transmission(Microscope)	U	Uvalde	604
250	UV042821HA46	41	7	Fragment	581	ATR-Polymer2	D_PI4	PI	Polyimide Dura Sampl IR-II	U	Uvalde	581
251	UV042821HA46	42	8	Fragment	606	IRs Polymer2	PETG	PETG	Polyethylene glycolORIGIN Date: 92/03/27 File: PETG.DXINFRARED SPECTROPHOTOMETER FTIR-8000 SERIES	U	Uvalde	606
252	UV042821HA46	43	9	Film	600	IRs Polymer2	PS1	PS	PolystyreneFilm	U	Uvalde	600
253	UV042821HA46	44	10	Fragment	602	ATR-Polymer2	D_PI1	PI	Polyimide(UPILEX) DuraSamplIR-II	U	Uvalde	602
254	UV042821HA46	45	11	Fragment	598	ATR-Polymer2	D_Hc-BR2	BR3	High-cis Butadiene Rubber(High-cis Polybutadiene) DuraSamplIR-II	U	Uvalde	598
255	UV042821HA46	46	12	Fragment	595	T-Polymer2	Epoxy	EPX	Epoxy Resin(Electronic Parts-3) Transmission(Microscope)	U	Uvalde	595
256	UV042821HA46	47	13	Fragment	616	ATR-Polymer2	D_PC	PC	Polycarbonate(PC) DuraSamplIR-II	U	Uvalde	616
257	UV042821HA46	48	14	Fragment	593	ATR-Polymer2	D_Aramid	ARA	Aramid Fiber DuraSamplIR-II	U	Uvalde	593
258	UV042821HA46	49	15	Fragment	669	T-Polymer2	PC	PC	Polycarbonate(PC) Transmission(Microscope)	U	Uvalde	669
259	UV042821HA46	50	16	Film	580	ATR-Polymer2	D_Polyester2	PET	Polyester Film (TAIKO-FE) Dura Sampl IR-II	U	Uvalde	580
260	UV042821HA46	51	17	Fragment	591	T-Polymer2	Epoxy	EPX	Epoxy Adhesives Transmission(Microscope)	U	Uvalde	591
261	UV042821HA48	76	1	Fragment	595	T-Polymer2	Epoxy	EPX	Epoxy Resin(Electronic Parts-3) Transmission(Microscope)	U	Uvalde	595
262	UV042821HA48	77	2	Fragment	628	T-Polymer2	Epoxy	EPX	Epoxy Resin Transmission(Microscope)	U	Uvalde	628
263	UV042821HA48	78	3	Fragment	585	IRs Polymer2	IrganoxMD1024	PA	Irganox MD1024 HINDERED PHENOLIC ANTIOXIDANT-METAL DEACTIVATOR1,2-BIS(3,5-DI-tert-BUTYL-4-HYDROXYHYDROCINNAMOYL)HYDRAZINE; HINDERED PHENOL C34H52O4N2 CAS NO. 32687-78-8 ATR/diamond ATR corrected	U	Uvalde	585
264	UV042821HA48	79	4	Fragment	605	ATR-Polymer2	D_PC	PC	Polycarbonate(PC) DuraSamplIR-II	U	Uvalde	605
265	UV042821HA48	80	5	Fragment	591	ATR-Polymer2	D_PVC_Carboxylated	PVC	Poly (Vinyl Chloride) (PVC), Carboxylated (Carboxyl content 1.8%) DuraSamplIR-II	U	Uvalde	591
266	UV042821HA48	81	6	Film	687	IRs Polymer2	NYLON11	NYL	Nylon 11 [-NH(CH2)10CO-]nFilm	U	Uvalde	687
267	UV042821HA48	82	7	Fragment	617	T-Polymer2	T_PVC with PhenoricSulfonicEster	PVC	Polyvinylchloride with Phenolic ester of aliphatic sulfonic acid Transmission(Microscope)	U	Uvalde	617
268	UV042821HA48	83	8	Fragment	593	T-Polymer2	PC	PC	Polycarbonate(PC) Transmission(Microscope)	U	Uvalde	593
269	UV042821HA48	84	9	Fiber	570	ATR-Polymer2	D_PEEK	PEEK	Polyetheretherketone (PEEK) Dura Sampl IR-II	U	Uvalde	570
270	UV042821HA48	85	10	Film	787	IRs Polymer2	LDPE	LDPE	Low Density PolyethyleneFilm	U	Uvalde	787
271	UV042821HA48	86	11	Fragment	603	T-Polymer2	PAR	PAR	Polyarylate(PAR) Transmission(Microscope)	U	Uvalde	603
272	UV042821HA48	87	12	Fragment	599	T-Polymer2	Epoxy	EPX	Epoxy Resin Transmission(Microscope)	U	Uvalde	599
273	UV042821HA48	88	13	Fragment	617	ATR-Polymer2	D_PC	PC	Polycarbonate(PC) DuraSamplIR-II	U	Uvalde	617
274	UV042821HA48	89	14	Fragment	681	T-Polymer2	Polyacetylene	PAC	Polyacetylene Transmission(Microscope)	U	Uvalde	681
275	UV042821HA48	90	15	Fragment	577	T-Polymer2	PBT	PBT	Polybutylene Terephthalate (PBT) Transmission (Microscope)	U	Uvalde	577
276	UV042821HA52	18	1	Fragment	640	T-Polymer2	PC	PC	Polycarbonate(PC) Transmission(Microscope)	U	Uvalde	640	1
277	UV042821HA52	19	2	Fragment	590	IRs Polymer2	FEP	FEP	FEP, Tetrafluoroethylene Hexafluoropropylene ATR/diamond ATR corrected	U	Uvalde	590	2
278	UV042821HA52	20	3	Fragment	710	T-Polymer2	PC	PC	Polycarbonate(PC) Transmission(Microscope)	U	Uvalde	710	3
279	UV042821HA52	21	4	Fragment	637	ATR-Polymer2	D_Epoxy5	EPX	Epoxy Resin DuraSamplIR-II	U	Uvalde	637	4
280	UV042821HA52	22	5	Fragment	590	IRs Polymer2	PI1	PI	Polyimide KAPTON Film	U	Uvalde	590	5
281	UV042821HA52	23	6	Fragment	596	ATR-Polymer2	D_Poly_4_Methyl_1_Pentene	PMP	Poly(4-Methyl-1 Pentene) DuraSamplIR-II	U	Uvalde	596	6
282	UV042821HA52	24	7	Fragment	589	T-Polymer2	PC	PC	Polycarbonate (PC) Transmission (Microscope)	U	Uvalde	589	7
283	UV042821HA52	25	8	Fragment	594	T-Polymer2	T_PC2	PC	Polycarbonate(PC) Transmission(Microscope)	U	Uvalde	594	8
284	UV042821HA52	26	9	Fragment	589	IRs Polymer2	PS	PS	Polystyrene ATR/diamond ATR corrected	U	Uvalde	589	9
285	UV042821HA52	27	10	Fragment	622	T-Polymer2	PC	PC	Polycarbonate(PC) Transmission(Microscope)	U	Uvalde	622	10
286	UV042821HA52	28	11	Fiber	590	T-Polymer2	High-trans Polybutadiene	BR3	High-trans Butadiene Rubber (High-trans Polybutadiene) Transmission (Microscope)	U	Uvalde	590	11
287	UV042821HA52	29	12	Fragment	596	T-Polymer2	T_1_2_Polybutadiene	BR3	1,2-Polybutadiene Transmission(Microscope)	U	Uvalde	596	12
288	UV042821HA52	30	13	Fragment	593	IRs Polymer2	DLTDP	DLTDP	DLTDPANTIOXIDANT (CONTAINING SULFUR)DILAURYL THIODIPROPIONATEC30H58O4SCAS NO. 123-28-4ATR/diamond ATRcorrected	U	Uvalde	593	13
289	UV042821HA52	31	14	Fragment	619	ATR-Polymer2	D_PC	PC	Polycarbonate(PC) DuraSamplIR-II	U	Uvalde	619	14
290	UV042821HA52	32	15	Fiber	581	ATR-Polymer2	D_Nylon6_12	NYL	Nylon 6/12 (Polyhexamethylene dodecanediamide) Dura Sampl IR-II	U	Uvalde	581	15
291	UV042821HA52	33	16	Film	574	IRs Polymer2	PES	PES	PES Film	U	Uvalde	574	16
292	UV042821HA52	34	17	Fragment	720	T-Polymer2	T_PC2	PC	Polycarbonate(PC) Transmission(Microscope)	U	Uvalde	720	17
293	UV042821HA52	35	18	Fragment	594	T-Polymer2	Epoxy	EPX	Epoxy Adhesives Transmission(Microscope)	U	Uvalde	594	18
	Sample	Number of MPs Analyzed
1	DR041120HA10	8	8
2	DR041120HA32	15	15
3	DR041120HD03	14	14
4	DR041120HE02	12	12
5	DR041120HG02	10	10
6	DR041120HG06	21	21
7	DR041120HJ03	7	7
8	DR041120HJ28	5	5
9	DR041120HM01	11	11
10	DR041120HR01	19	19
11	DR041120HT03	13	13
12	UV042821HA04	21	21
13	UV042821HA05	24	24
14	UV042821HA11	8	8
15	UV042821HA12	17	17
16	UV042821HA22	14	14
17	UV042821HA31	19	19
18	UV042821HA34	15	15
19	UV042821HA46	17	17
20	UV042821HA48	15	15
21	UV042821HA52	18	18
		303	303
[truncated: 33 more columns]

## Sheet: Box Plot
City	Score		Del Rio (125)	Uvalde (163)
Del Rio	768		729	787
Del Rio	729		718	720
Del Rio	718		708	718
Del Rio	708		703	710
Del Rio	703		698	702
Del Rio	698		696	694
Del Rio	696		695	692
Del Rio	695		670	690
Del Rio	670		666	687
Del Rio	666		663	682
Del Rio	663		659	681
Del Rio	659		659	677
Del Rio	659		658	669
Del Rio	658		657	669
Del Rio	657		656	667
Del Rio	656		656	664
Del Rio	656		651	664
Del Rio	651		649	660
Del Rio	649		647	654
Del Rio	647		647	642
Del Rio	647		645	641
Del Rio	645		645	640
Del Rio	645		644	640
Del Rio	644		644	637
Del Rio	644		641	637
Del Rio	641		640	637
Del Rio	640		638	636
Del Rio	638		637	634
Del Rio	637		635	632
Del Rio	635		635	629
Del Rio	635		632	629
Del Rio	632		632	628
Del Rio	632		632	628
Del Rio	632		628	624
Del Rio	628		626	622
Del Rio	626		626	619
Del Rio	626		626	619
Del Rio	626		625	619
Del Rio	625		625	617
Del Rio	625		623	617
Del Rio	623		621	616
Del Rio	621		621	614
Del Rio	621		620	613
Del Rio	620		620	613
Del Rio	620		619	612
Del Rio	619		618	609
Del Rio	618		618	608
Del Rio	618		618	608
Del Rio	618		615	607
Del Rio	615		615	606
Del Rio	615		615	606
Del Rio	615		613	606
Del Rio	613		611	606
Del Rio	611		609	606
Del Rio	609		607	606
Del Rio	607		607	605
Del Rio	607		606	605
Del Rio	606		605	605
Del Rio	605		605	604
Del Rio	605		603	603
Del Rio	603		603	603
Del Rio	603		603	603
Del Rio	603		601	602
Del Rio	602		601	602
Del Rio	601		600	602
Del Rio	601		599	601
Del Rio	600		598	600
Del Rio	599		598	600
Del Rio	599		596	600
Del Rio	598		596	600
Del Rio	598		596	600
Del Rio	596		595	599
Del Rio	596		595	599
Del Rio	596		595	599
Del Rio	595		594	599
Del Rio	595		593	598
Del Rio	595		593	598
Del Rio	594		592	598
Del Rio	593		592	598
Del Rio	593		592	597
Del Rio	592		591	597
Del Rio	592		591	596
Del Rio	592		591	596
Del Rio	591		591	596
Del Rio	591		591	595
Del Rio	591		590	595
Del Rio	591		590	595
Del Rio	591		589	595
Del Rio	590		589	594
Del Rio	590		589	594
Del Rio	590		588	593
Del Rio	589		588	593
Del Rio	589		588	593
Del Rio	589		587	593
Del Rio	588		587	592
Del Rio	588		587	592
Del Rio	588		587	592
Del Rio	587		586	592
Del Rio	587		586	591
Del Rio	587		586	591
Del Rio	587		585	591
Del Rio	586		585	591
Del Rio	586		584	590
Del Rio	586		582	590
Del Rio	585		582	590
Del Rio	585		582	590
Del Rio	584		582	590
Del Rio	582		581	590
Del Rio	582		580	590
Del Rio	582		580	589
Del Rio	582		580	589
Del Rio	581		580	589
Del Rio	580		579	589
Del Rio	580		579	589
Del Rio	580		578	588
Del Rio	580		577	588
Del Rio	579		576	588
Del Rio	579		575	587
Del Rio	578		575	587
Del Rio	577		572	587
Del Rio	576		570	586
Del Rio	575		570	586
Del Rio	575		569	586
Del Rio	572		569	585
Del Rio	570		569	585
Del Rio	570			584
Del Rio	569			584
Del Rio	569			583
Del Rio	569			583
Uvalde	787			582
Uvalde	720			582
Uvalde	718			581
Uvalde	710			581
Uvalde	702			581
Uvalde	694			581
Uvalde	692			581
Uvalde	690			581
Uvalde	687			581
Uvalde	682			580
Uvalde	681			580
Uvalde	677			580
Uvalde	669			580
Uvalde	669			579
Uvalde	667			579
Uvalde	664			579
Uvalde	664			578
Uvalde	660			578
Uvalde	654			578
Uvalde	652			577
Uvalde	642			577
Uvalde	641			577
Uvalde	640			576
Uvalde	640			576
Uvalde	637			575
Uvalde	637			575
Uvalde	637			574
Uvalde	636			573
Uvalde	634			572
Uvalde	632			571
Uvalde	629			570
Uvalde	629			570
Uvalde	628			566
Uvalde	628			564
Uvalde	624
Uvalde	622
Uvalde	619
Uvalde	619
Uvalde	619
Uvalde	617
Uvalde	617
Uvalde	616
Uvalde	614
Uvalde	613
Uvalde	613
Uvalde	612
Uvalde	609
Uvalde	608
Uvalde	608
Uvalde	607
Uvalde	606
Uvalde	606
Uvalde	606
Uvalde	606
Uvalde	606
Uvalde	606
Uvalde	605
Uvalde	605
Uvalde	605
Uvalde	604
Uvalde	603
Uvalde	603
Uvalde	603
Uvalde	602
Uvalde	602
Uvalde	602
Uvalde	601
Uvalde	600
Uvalde	600
Uvalde	600
Uvalde	600
Uvalde	600
Uvalde	599
Uvalde	599
Uvalde	599
Uvalde	599
Uvalde	598
Uvalde	598
Uvalde	598
Uvalde	598
Uvalde	597
Uvalde	597
Uvalde	596
Uvalde	596
Uvalde	596
Uvalde	595
Uvalde	595
Uvalde	595
Uvalde	595
Uvalde	594
Uvalde	594
Uvalde	593
Uvalde	593
Uvalde	593
Uvalde	593
Uvalde	592
Uvalde	592
Uvalde	592
Uvalde	592
Uvalde	591
Uvalde	591
Uvalde	591
Uvalde	591
Uvalde	590
Uvalde	590
Uvalde	590
Uvalde	590
Uvalde	590
Uvalde	590
Uvalde	590
Uvalde	589
Uvalde	589
Uvalde	589
Uvalde	589
Uvalde	589
Uvalde	588
Uvalde	588
Uvalde	588
Uvalde	587
Uvalde	587
Uvalde	587
Uvalde	586
Uvalde	586
Uvalde	586
Uvalde	585
Uvalde	585
Uvalde	584
Uvalde	584
Uvalde	583
Uvalde	583
Uvalde	582
Uvalde	582
Uvalde	581
Uvalde	581
Uvalde	581
Uvalde	581
Uvalde	581
Uvalde	581
Uvalde	581
Uvalde	580
Uvalde	580
Uvalde	580
Uvalde	580
Uvalde	579
Uvalde	579
Uvalde	579
Uvalde	578
Uvalde	578
Uvalde	578
Uvalde	577
Uvalde	577
Uvalde	577
Uvalde	576
Uvalde	576
Uvalde	575
Uvalde	575
Uvalde	574
Uvalde	573
Uvalde	572
Uvalde	571
Uvalde	570
Uvalde	570
Uvalde	566
Uvalde	564

## Sheet: MP by Shape
							1	2	3	4	5	6	7	8	9	10	11	12	13	14	15	16	17	18	19	20	21				Population Microplastics											Per Hailstone Summary Statistics Fragment			Per Hailstone Summary Statistics Fiber			Per Hailstone Summary Statistics Film
Count	Sample	Type	Count				DR042820HA10	DR042821HA32	DR041120HD03	DR041120HE02	DR041120HG02	DR041120HG06	DR041120HJ03	DR041120HJ28	DR041120HM01	DR041120HR01	DR041120HT03	UV042821HA04	UV042821HA05	UV042821HA11	UV042821HA12	UV042821HA22	UV042821HA31	UV042821HA34	UV042821HA46	UV042821HA48	UV042821HA52				Fiber	Film	Fragment		0	Fragment	Fiber	Film	Sphere
1	DR042820HA10	Fragment	1			Fragment	6	8	12	9	5	14	4	0	8	10	9	16	6	5	15	8	15	10	13	12	15			Mean	9.10526	9.25	9.52381		DR042820HA10	6	1	0	0
2	DR042820HA10	Fragment	2			Fiber	1	5	0	2	2	5	2	4	3	7	3	3	14	1	1	4	3	4	1	1	2								DR042821HA32	8	5	1	0			Mean	9.71429		Mean	3.28571		Mean	0.904762
3	DR042820HA10	Fragment	3			Film	0	1	0	1	1	0	1	1	0	0	0	0	1	2	1	2	1	1	3	2	1								DR041120HD03	12	0	0	0			Standard Error	0.956539		Standard Error	0.651529		Standard Error	0.181328
4	DR042820HA10	Fragment	4			Sphere	0	0	0	0	1	0	0	0	0	0	0	0	0	0	0	0	0	0	0	0	0								DR041120HE02	9	2	1	0			Median	10		Median	3		Median	1
5	DR042820HA10	Fragment	5				7	14	12	12	9	19	7	5	11	17	12	19	21	8	17	14	19	15	17	15	18								DR041120HG02	5	2	1	1			Mode	15		Mode	1		Mode	1
6	DR042820HA10	Fiber	6			grand total	125										Grand Total	163																	DR041120HG06	14	5	0	0			Standard Deviation	4.38341		Standard Deviation	2.98568		Standard Deviation	0.830949
7	DR042820HA10	Fragment	7				DR042820HA10 (7)	DR042821HA32 (14)	DR041120HD03 (12)	DR041120HE02 (12)	DR041120HG02 (9)	DR041120HG06 (19)	DR041120HJ03 (7)	DR041120HJ28 (5)	DR041120HM01 (11)	DR041120HR01 (17)	DR041120HT03 (12)	UV042821HA04 (19)	UV042821HA05 (21)	UV042821HA11 (8)	UV042821HA12 (17)	UV042821HA22 (14)	UV042821HA31 (19)	UV042821HA34 (15)	UV042821HA46 (17)	UV042821HA48 (15)	UV042821HA52 (18)								DR041120HJ03	4	2	1	0			Sample Variance	19.2143		Sample Variance	8.91429		Sample Variance	0.690476
8	DR042821HA32	Fiber	1			Fragment	0.857143	0.571429	1	0.75	0.555556	0.736842	0.571429	0	0.727273	0.588235	0.75	0.842105	0.285714	0.625	0.882353	0.571429	0.789474	0.666667	0.764706	0.8	0.833333								DR041120HJ28	0	4	1	0			Kurtosis	-0.393399		Kurtosis	8.09165		Kurtosis	0.497828
9	DR042821HA32	Fragment	2			Fiber	0.142857	0.357143	0	0.166667	0.222222	0.263158	0.285714	0.8	0.272727	0.411765	0.25	0.157895	0.666667	0.125	0.0588235	0.285714	0.157895	0.266667	0.0588235	0.0666667	0.111111								DR041120HM01	8	3	0	0			Skewness	-0.299282		Skewness	2.47233		Skewness	0.767059
10	DR042821HA32	Fiber	3			Film	0	0.0714286	0	0.0833333	0.111111	0	0.142857	0.2	0	0	0	0	0.047619	0.25	0.0588235	0.142857	0.0526316	0.0666667	0.176471	0.133333	0.0555556								DR041120HR01	10	7	0	0			Range	17		Range	14		Range	3
11	DR042821HA32	Fiber	4			Sphere	0	0	0	0	0.111111	0	0	0	0	0	0	0	0	0	0	0	0	0	0	0	0								DR041120HT03	9	3	0	0			Minimum	0		Minimum	0		Minimum	0
12	DR042821HA32	Fragment	5				1	1	1	1	1	1	1	1	1	1	1	1	1	1	1	1	1	1	1	1	1								UV042821HA04	16	3	0	0			Maximum	17		Maximum	14		Maximum	3
13	DR042821HA32	Fragment	6																																UV042821HA05	6	14	1	0			Sum	204		Sum	69		Sum	19
14	DR042821HA32	Fragment	7																																UV042821HA11	5	1	2	0			Count	21		Count	21		Count	21
15	DR042821HA32	Fiber	8																																UV042821HA12	15	1	1	0
16	DR042821HA32	Fragment	9																																UV042821HA22	8	4	2	0
17	DR042821HA32	Fragment	10																																UV042821HA31	15	3	1	0
18	DR042821HA32	Fragment	11																																UV042821HA34	10	4	1	0
19	DR042821HA32	Fragment	12																																UV042821HA46	13	1	3	0
20	DR042821HA32	Fiber	13																																UV042821HA48	12	1	2	0
21	DR042821HA32	Fragment	14																																UV042821HA52	15	2	1	0
22	DR042821HA32	Film	15																																	200	68	19	1	288
23	DR041120HD03	Fragment	1																																	0.694444	0.236111	0.0659722	0.00347222	1
24	DR041120HD03	Fragment	2
25	DR041120HD03	Fragment	3
26	DR041120HD03	Fragment	4
27	DR041120HD03	Fragment	5
28	DR041120HD03	Fragment	6
29	DR041120HD03	Fragment	7
30	DR041120HD03	Fragment	8
31	DR041120HD03	Fragment	9
32	DR041120HD03	Fragment	10
33	DR041120HD03	Fragment	11
34	DR041120HD03	Fragment	12
35	DR041120HE02	Fragment	1
36	DR041120HE02	Fragment	2
37	DR041120HE02	Fragment	3
38	DR041120HE02	Fragment	4
39	DR041120HE02	Fragment	5
40	DR041120HE02	Fiber	6
41	DR041120HE02	Fragment	7
42	DR041120HE02	Fragment	8
43	DR041120HE02	Fragment	9
44	DR041120HE02	Fragment	10
45	DR041120HE02	Fiber	11
46	DR041120HE02	Film	12
47	DR041120HG02	Fragment	1
48	DR041120HG02	Film	2
49	DR041120HG02	Sphere	3
50	DR041120HG02	Fiber	4
51	DR041120HG02	Fiber	5
52	DR041120HG02	Fiber	6
53	DR041120HG02	Fragment	7
54	DR041120HG02	Fragment	8
55	DR041120HG02	Fragment	9
56	DR041120HG02	Fragment	10
57	DR041120HG06	Fiber	1
58	DR041120HG06	Fiber	2
59	DR041120HG06	Fiber	3
60	DR041120HG06	Fragment	4
61	DR041120HG06	Fragment	5
62	DR041120HG06	Fragment	6
63	DR041120HG06	Fragment	7
64	DR041120HG06	Fragment	8
65	DR041120HG06	Fiber	9
66	DR041120HG06	Fiber	10
67	DR041120HG06	Fragment	11
68	DR041120HG06	Fragment	12
69	DR041120HG06	Fragment	13
70	DR041120HG06	Fragment	14
71	DR041120HG06	Fragment	15
72	DR041120HG06	Fragment	16
73	DR041120HG06	Fragment	17
74	DR041120HG06	Fragment	18
75	DR041120HG06	Fragment	19
76	DR041120HJ03	Fiber	1
77	DR041120HJ03	Fiber	2
78	DR041120HJ03	Fragment	3
79	DR041120HJ03	Fragment	4
80	DR041120HJ03	Film	5
81	DR041120HJ03	Fragment	6
82	DR041120HJ03	Fragment	7
83	DR041120HJ28	Fiber	1
84	DR041120HJ28	Fiber	2
85	DR041120HJ28	Fiber	3
86	DR041120HJ28	Fiber	4
87	DR041120HJ28	Film	5
88	DR041120HM01	Fragment	1
89	DR041120HM01	Fiber	2
90	DR041120HM01	Fragment	3
91	DR041120HM01	Fragment	4
92	DR041120HM01	Fragment	5
93	DR041120HM01	Fragment	6
94	DR041120HM01	Fiber	7
95	DR041120HM01	Fragment	8
96	DR041120HM01	Fragment	9
97	DR041120HM01	Fiber	10
98	DR041120HM01	Fragment	11
99	DR041120HR01	Fiber	1
100	DR041120HR01	Fragment	2
101	DR041120HR01	Fiber	3
102	DR041120HR01	Fragment	4
103	DR041120HR01	Fragment	5
104	DR041120HR01	Fiber	6
105	DR041120HR01	Fragment	7
106	DR041120HR01	Fiber	8
107	DR041120HR01	Fragment	9
108	DR041120HR01	Fragment	10
109	DR041120HR01	Fragment	11
110	DR041120HR01	Fragment	12
111	DR041120HR01	Fragment	13
112	DR041120HR01	Fragment	14
113	DR041120HR01	Fragment	15
114	DR041120HR01	Fiber	16
115	DR041120HR01	Fiber	17
116	DR041120HR01	Fiber	18
117	DR041120HT03	Fragment	1
118	DR041120HT03	Fragment	2
119	DR041120HT03	Fragment	3
120	DR041120HT03	Fragment	4
121	DR041120HT03	Fragment	5
122	DR041120HT03	Fragment	6
123	DR041120HT03	Fragment	7
124	DR041120HT03	Fiber	8
125	DR041120HT03	Fragment	9
126	DR041120HT03	Fragment	10
127	DR041120HT03	Fiber	11
128	DR041120HT03	Fiber	12
129	DR041120HT03	Fragment	13
130	UV042821HA04	Fragment	1
131	UV042821HA04	Fiber	2
132	UV042821HA04	Fragment	3
133	UV042821HA04	Fragment	4
134	UV042821HA04	Fragment	5
135	UV042821HA04	Fragment	6
136	UV042821HA04	Fragment	7
137	UV042821HA04	Fragment	8
138	UV042821HA04	Fragment	9
139	UV042821HA04	Fragment	10
140	UV042821HA04	Fragment	11
141	UV042821HA04	Fragment	12
142	UV042821HA04	Fragment	13
143	UV042821HA04	Fragment	14
144	UV042821HA04	Fiber	15
145	UV042821HA04	Fragment	16
146	UV042821HA04	Fragment	17
147	UV042821HA04	Fragment	18
148	UV042821HA04	Fragment	19
149	UV042821HA04	Fiber	20
150	UV042821HA05	Fiber	1
151	UV042821HA05	Fiber	2
152	UV042821HA05	Fiber	3
153	UV042821HA05	Fiber	4
154	UV042821HA05	Fiber	5
155	UV042821HA05	Fiber	6
156	UV042821HA05	Fiber	7
157	UV042821HA05	Film	8
158	UV042821HA05	Fragment	9
159	UV042821HA05	Fiber	10
160	UV042821HA05	Fiber	11
161	UV042821HA05	Fiber	12
162	UV042821HA05	Fiber	13
163	UV042821HA05	Fiber	14
164	UV042821HA05	Fragment	15
165	UV042821HA05	Fragment	16
166	UV042821HA05	Fiber	17
167	UV042821HA05	Fragment	18
168	UV042821HA05	Fragment	19
169	UV042821HA05	Fiber	20
170	UV042821HA05	Fragment	21
171	UV042821HA11	Film	1
172	UV042821HA11	Fragment	2
173	UV042821HA11	Fragment	3
174	UV042821HA11	Fiber	4
175	UV042821HA11	Fragment	5
176	UV042821HA11	Fragment	6
177	UV042821HA11	Film	7
178	UV042821HA11	Fragment	8
179	UV042821HA12	Fiber	1
180	UV042821HA12	Fragment	2
181	UV042821HA12	Fragment	3
182	UV042821HA12	Fragment	4
183	UV042821HA12	Fragment	5
184	UV042821HA12	Fragment	6
185	UV042821HA12	Fragment	7
186	UV042821HA12	Fragment	8
187	UV042821HA12	Fragment	9
188	UV042821HA12	Fragment	10
189	UV042821HA12	Fragment	11
190	UV042821HA12	Fragment	12
191	UV042821HA12	Fragment	13
192	UV042821HA12	Fragment	14
193	UV042821HA12	Fragment	15
194	UV042821HA12	Fragment	16
195	UV042821HA12	Film	17
196	UV042821HA22	Fragment	1
197	UV042821HA22	Fragment	2
198	UV042821HA22	Fragment	3
199	UV042821HA22	Fragment	4
200	UV042821HA22	Film	5
201	UV042821HA22	Fiber	6
202	UV042821HA22	Film	7
203	UV042821HA22	Fragment	8
204	UV042821HA22	Fragment	9
205	UV042821HA22	Fragment	10
206	UV042821HA22	Fiber	11
207	UV042821HA22	Fiber	12
208	UV042821HA22	Fiber	13
209	UV042821HA22	Fragment	14
210	UV042821HA31	Fiber	1
211	UV042821HA31	Fragment	2
212	UV042821HA31	Fragment	3
213	UV042821HA31	Fragment	4
214	UV042821HA31	Film	5
215	UV042821HA31	Fiber	6
216	UV042821HA31	Fragment	7
217	UV042821HA31	Fiber	8
218	UV042821HA31	Fragment	9
219	UV042821HA31	Fragment	10
220	UV042821HA31	Fragment	11
221	UV042821HA31	Fragment	12
222	UV042821HA31	Fragment	13
223	UV042821HA31	Fragment	14
224	UV042821HA31	Fragment	15
225	UV042821HA31	Fragment	16
226	UV042821HA31	Fragment	17
227	UV042821HA31	Fragment	18
228	UV042821HA31	Fragment	19
229	UV042821HA34	Fragment	1
230	UV042821HA34	Fragment	2
231	UV042821HA34	Fiber	3
232	UV042821HA34	Fragment	4
233	UV042821HA34	Fragment	5
234	UV042821HA34	Film	6
235	UV042821HA34	Fiber	7
236	UV042821HA34	Fiber	8
237	UV042821HA34	Fragment	9
238	UV042821HA34	Fragment	10
239	UV042821HA34	Fragment	11
240	UV042821HA34	Fragment	12
241	UV042821HA34	Fragment	13
242	UV042821HA34	Fragment	14
243	UV042821HA34	Fiber	15
244	UV042821HA46	Fiber	1
245	UV042821HA46	Film	2
246	UV042821HA46	Fragment	3
247	UV042821HA46	Fragment	4
248	UV042821HA46	Fragment	5
249	UV042821HA46	Fragment	6
250	UV042821HA46	Fragment	7
251	UV042821HA46	Fragment	8
252	UV042821HA46	Film	9
253	UV042821HA46	Fragment	10
254	UV042821HA46	Fragment	11
255	UV042821HA46	Fragment	12
256	UV042821HA46	Fragment	13
257	UV042821HA46	Fragment	14
258	UV042821HA46	Fragment	15
259	UV042821HA46	Film	16
260	UV042821HA46	Fragment	17
261	UV042821HA48	Fragment	1
262	UV042821HA48	Fragment	2
263	UV042821HA48	Fragment	3
264	UV042821HA48	Fragment	4
265	UV042821HA48	Fragment	5
266	UV042821HA48	Film	6
267	UV042821HA48	Fragment	7
268	UV042821HA48	Fragment	8
269	UV042821HA48	Fiber	9
270	UV042821HA48	Film	10
271	UV042821HA48	Fragment	11
272	UV042821HA48	Fragment	12
273	UV042821HA48	Fragment	13
274	UV042821HA48	Fragment	14
275	UV042821HA48	Fragment	15
276	UV042821HA52	Fragment	1
277	UV042821HA52	Fragment	2
278	UV042821HA52	Fragment	3
279	UV042821HA52	Fragment	4
280	UV042821HA52	Fragment	5
281	UV042821HA52	Fragment	6
282	UV042821HA52	Fragment	7
283	UV042821HA52	Fragment	8
284	UV042821HA52	Fragment	9
285	UV042821HA52	Fragment	10
286	UV042821HA52	Fiber	11
287	UV042821HA52	Fragment	12
288	UV042821HA52	Fragment	13
289	UV042821HA52	Fragment	14
290	UV042821HA52	Fiber	15
291	UV042821HA52	Film	16
292	UV042821HA52	Fragment	17
293	UV042821HA52	Fragment	18

## Sheet: MP by Chemical
							1	2	3	4	5	6	7	8	9	10	11					12	13	14	15	16	17	18	19	20	21
Count	Sample	Chemical Abbreviation	Top 12 Chemical Abbreviation			Top 12 Chemical Abbreviation	DR042820HA10	DR042821HA32	DR041120HD03	DR041120HE02	DR041120HG02	DR041120HG06	DR041120HJ03	DR041120HJ28	DR041120HM01	DR041120HR01	DR041120HT03			Count		UV042821HA04	UV042821HA05	UV042821HA11	UV042821HA12	UV042821HA22	UV042821HA31	UV042821HA34	UV042821HA46	UV042821HA48	UV042821HA52
1	DR042820HA10	PC	PC		1	PC	4	5	8	5	3	7	1	1	3	10	3	50		1	PC	11	3	0	3	4	3	1	2	3	7	37
2	DR042820HA10	PC	PC		2	BR3	0	0	0	1	0	1	1	0	1	2	1			2	EPX	1	2	2	2	1	2	2	2	3	2
3	DR042820HA10	RUBB	RUBB		3	PA	1	0	1	0	0	0	0	0	1	0	2			3	PA	1	2	1	1	1	3	2	1	1	0
4	DR042820HA10	PET	PET		4	PLT	0	1	0	0	1	1	0	0	0	1	1			4	PPS	0	2	2	2	1	2	0	0	0	0
5	DR042820HA10	PC	PC		5	EPX	0	2	0	0	0	0	0	1	1	0	0			5	PI	0	1	0	1	1	2	0	2	0	1
6	DR042820HA10	PA	PA		6	PEG	0	0	0	2	1	0	1	0	0	0	0			6	BR3	1	0	0	0	2	1	0	1	0	2
7	DR042820HA10	PC	PC		7	PET	1	0	0	0	0	0	0	1	2	0	0			7	PEG	1	1	0	1	1	0	1	0	0	0
8	DR042821HA32	PS	Other		8	RUBB	1	0	1	0	0	2	0	0	0	0	0			8	PVC	0	0	0	2	0	0	0	1	2	0
9	DR042821HA32	PAM	Other		9	HRB	0	1	0	0	0	2	0	0	0	0	0			9	PS	0	1	1	0	0	0	0	1	0	1
10	DR042821HA32	PI	PI		10	PI	0	2	0	0	0	1	0	0	0	0	0			10	RUBB	0	1	0	0	0	2	1	0	0	0
11	DR042821HA32	EPX	EPX		11	PPS	0	1	0	0	0	0	0	0	1	0	1			11	DLTDP	0	1	0	0	0	1	0	0	0	1
12	DR042821HA32	HRB	HRB		12	SI	0	0	0	1	2	0	0	0	0	0	0			12	PP	0	0	1	0	0	1	0	1	0	0
13	DR042821HA32	PC	PC		13	Other	0	3	2	3	3	5	4	2	2	5	5			13	LS770	0	1	0	1	0	0	1	0	0	0
14	DR042821HA32	PC	PC			Total	7	15	12	12	10	19	7	5	11	18	13			14	Other	5	6	1	4	3	2	7	6	6	4
15	DR042821HA32	PI	PI			grand total	129															20	21	8	17	14	19	15	17	15	18
16	DR042821HA32	PLT	PLT																		Grand Total	164
17	DR042821HA32	PC	PC
18	DR042821HA32	PC	PC
19	DR042821HA32	EPX	EPX				1	2	3	4	5	6	7	8	9	10	11					12	13	14	15	16	17	18	19	20	21
20	DR042821HA32	PBT	Other				DR042820HA10	DR042821HA32	DR041120HD03	DR041120HE02	DR041120HG02	DR041120HG06	DR041120HJ03	DR041120HJ28	DR041120HM01	DR041120HR01	DR041120HT03					UV042821HA04	UV042821HA05	UV042821HA11	UV042821HA12	UV042821HA22	UV042821HA31	UV042821HA34	UV042821HA46	UV042821HA48	UV042821HA52
21	DR042821HA32	PC	PC		1	PC	0.571429	0.333333	0.666667	0.416667	0.3	0.368421	0.142857	0.2	0.272727	0.555556	0.230769			1	PC	0.55	0.142857	0	0.176471	0.285714	0.157895	0.0666667	0.117647	0.2	0.388889
22	DR042821HA32	PPS	PPS		2	BR3	0	0	0	0.0833333	0	0.0526316	0.142857	0	0.0909091	0.111111	0.0769231			2	EPX	0.05	0.0952381	0.25	0.117647	0.0714286	0.105263	0.133333	0.117647	0.2	0.111111
23	DR041120HD03	PVDF	Other		3	PA	0.142857	0	0.0833333	0	0	0	0	0	0.0909091	0	0.153846			3	PA	0.05	0.0952381	0.125	0.0588235	0.0714286	0.157895	0.133333	0.0588235	0.0666667	0
24	DR041120HD03	PC	PC		4	PLT	0	0.0666667	0	0	0.1	0.0526316	0	0	0	0.0555556	0.0769231			4	PPS	0	0.0952381	0.25	0.117647	0.0714286	0.105263	0	0	0	0
25	DR041120HD03	RUBB	RUBB		5	EPX	0	0.133333	0	0	0	0	0	0.2	0.0909091	0	0			5	PI	0	0.047619	0	0.0588235	0.0714286	0.105263	0	0.117647	0	0.0555556
26	DR041120HD03	PC	PC		6	PEG	0	0	0	0.166667	0.1	0	0.142857	0	0	0	0			6	BR3	0.05	0	0	0	0.142857	0.0526316	0	0.0588235	0	0.111111
27	DR041120HD03	PC	PC		7	PET	0.142857	0	0	0	0	0	0	0.2	0.181818	0	0			7	PEG	0.05	0.047619	0	0.0588235	0.0714286	0	0.0666667	0	0	0
28	DR041120HD03	PC	PC		8	RUBB	0.142857	0	0.0833333	0	0	0.105263	0	0	0	0	0			8	PVC	0	0	0	0.117647	0	0	0	0.0588235	0.133333	0
29	DR041120HD03	PC	PC		9	HRB	0	0.0666667	0	0	0	0.105263	0	0	0	0	0			9	PS	0	0.047619	0.125	0	0	0	0	0.0588235	0	0.0555556
30	DR041120HD03	PC	PC		10	PI	0	0.133333	0	0	0	0.0526316	0	0	0	0	0			10	RUBB	0	0.047619	0	0	0	0.105263	0.0666667	0	0	0
31	DR041120HD03	PA	PA		11	PPS	0	0.0666667	0	0	0	0	0	0	0.0909091	0	0.0769231			11	DLTDP	0	0.047619	0	0	0	0.0526316	0	0	0	0.0555556
32	DR041120HD03	PC	PC		12	SI	0	0	0	0.0833333	0.2	0	0	0	0	0	0			12	PP	0	0	0.125	0	0	0.0526316	0	0.0588235	0	0
33	DR041120HD03	PTFE2	Other		13	Other	0	0.2	0.166667	0.25	0.3	0.263158	0.571429	0.4	0.181818	0.277778	0.384615			13	LS770	0	0.047619	0	0.0588235	0	0	0.0666667	0	0	0
34	DR041120HD03	PC	PC				1	1	1	1	1	1	1	1	1	1	1			14	Other	0.25	0.285714	0.125	0.235294	0.214286	0.105263	0.466667	0.352941	0.4	0.222222
35	DR041120HE02	PC	PC																			1	1	1	1	1	1	1	1	1	1
36	DR041120HE02	PEG	PEG
37	DR041120HE02	BR3	BR3
38	DR041120HE02	SI	SI
39	DR041120HE02	PC	PC
40	DR041120HE02	PEG	PEG
41	DR041120HE02	PC	PC
42	DR041120HE02	PC	PC
43	DR041120HE02	PC	PC
44	DR041120HE02	PUR	Other
45	DR041120HE02	BMC	Other
46	DR041120HE02	PEI	Other
47	DR041120HG02	PC	PC
48	DR041120HG02	PEEK	Other
49	DR041120HG02	SI	SI
50	DR041120HG02	PB1	Other
51	DR041120HG02	PLT	PLT
52	DR041120HG02	PEEK	Other
53	DR041120HG02	PEG	PEG
54	DR041120HG02	SI	SI
55	DR041120HG02	PC	PC
56	DR041120HG02	PC	PC
57	DR041120HG06	RUBB	RUBB
58	DR041120HG06	RUBB	RUBB
59	DR041120HG06	PI	PI
60	DR041120HG06	PC	PC
61	DR041120HG06	PC	PC
62	DR041120HG06	PC	PC
63	DR041120HG06	PLT	PLT
64	DR041120HG06	PAC	Other
65	DR041120HG06	PES	Other
66	DR041120HG06	PVDF	Other
67	DR041120HG06	HRB	HRB
68	DR041120HG06	STR	Other
69	DR041120HG06	PC	PC
70	DR041120HG06	PC	PC
71	DR041120HG06	HRB	HRB
72	DR041120HG06	PC	PC
73	DR041120HG06	PC	PC
74	DR041120HG06	LDPE	Other
75	DR041120HG06	BR3	BR3
76	DR041120HJ03	BR3	BR3
77	DR041120HJ03	SMA	Other
78	DR041120HJ03	NYL	Other
79	DR041120HJ03	LS770	Other
80	DR041120HJ03	PEI	Other
81	DR041120HJ03	PC	PC
82	DR041120HJ03	PEG	PEG
83	DR041120HJ28	HDPE	Other
84	DR041120HJ28	PC	PC
85	DR041120HJ28	EPX	EPX
86	DR041120HJ28	PEPQ	Other
87	DR041120HJ28	PET	PET
88	DR041120HM01	PC	PC
89	DR041120HM01	PET	PET
90	DR041120HM01	PC	PC
91	DR041120HM01	PA	PA
92	DR041120HM01	HLAS	Other
93	DR041120HM01	PSO	Other
94	DR041120HM01	BR3	BR3
95	DR041120HM01	PPS	PPS
96	DR041120HM01	EPX	EPX
97	DR041120HM01	PET	PET
98	DR041120HM01	PC	PC
99	DR041120HR01	BR3	BR3
100	DR041120HR01	PC	PC
101	DR041120HR01	PS	Other
102	DR041120HR01	PC	PC
103	DR041120HR01	PC	PC
104	DR041120HR01	PPO	Other
105	DR041120HR01	PC	PC
106	DR041120HR01	PC	PC
107	DR041120HR01	PC	PC
108	DR041120HR01	PC	PC
109	DR041120HR01	PC	PC
110	DR041120HR01	PC	PC
111	DR041120HR01	PAP	Other
112	DR041120HR01	PC	PC
113	DR041120HR01	PLT	PLT
114	DR041120HR01	ACR	Other
115	DR041120HR01	BR3	BR3
116	DR041120HR01	PP	Other
117	DR041120HT03	PLT	PLT
118	DR041120HT03	PPS	PPS
119	DR041120HT03	PA	PA
120	DR041120HT03	PAC	Other
121	DR041120HT03	PVC	Other
122	DR041120HT03	PC	PC
123	DR041120HT03	NYL	Other
124	DR041120HT03	PCL	Other
125	DR041120HT03	PC	PC
126	DR041120HT03	PC	PC
127	DR041120HT03	BR3	BR3
128	DR041120HT03	PA	PA
129	DR041120HT03	PVDC	Other
130	UV042821HA04	EPX	EPX
131	UV042821HA04	PTFE2	Other
132	UV042821HA04	PIB	Other
133	UV042821HA04	PA	PA
134	UV042821HA04	PC	PC
135	UV042821HA04	PC	PC
136	UV042821HA04	PC	PC
137	UV042821HA04	PC	PC
138	UV042821HA04	MEL	Other
139	UV042821HA04	PC	PC
140	UV042821HA04	PC	PC
141	UV042821HA04	PC	PC
142	UV042821HA04	PC	PC
143	UV042821HA04	PLT	Other
144	UV042821HA04	PEG	PEG
145	UV042821HA04	PC	PC
146	UV042821HA04	PC	PC
147	UV042821HA04	PC	PC
148	UV042821HA04	FEP	Other
149	UV042821HA04	BR3	BR3
150	UV042821HA05	PPS	PPS
151	UV042821HA05	PPS	PPS
152	UV042821HA05	DLTDP	DLTDP
153	UV042821HA05	PEG	PEG
154	UV042821HA05	RUBB	RUBB
155	UV042821HA05	EPX	EPX
156	UV042821HA05	PDI	Other
157	UV042821HA05	LDPE	Other
158	UV042821HA05	PEPQ	Other
159	UV042821HA05	PC	PC
160	UV042821HA05	PI	PI
161	UV042821HA05	PA	PA
162	UV042821HA05	LS770	LS770
163	UV042821HA05	PS	PS
164	UV042821HA05	PA	PA
165	UV042821HA05	PC	PC
166	UV042821HA05	PEI	Other
167	UV042821HA05	PHSI	Other
168	UV042821HA05	PC	PC
169	UV042821HA05	PAM	Other
170	UV042821HA05	EPX	EPX
171	UV042821HA11	PP	PP
172	UV042821HA11	PA	PA
173	UV042821HA11	PPS	PPS
174	UV042821HA11	PS	PS
175	UV042821HA11	EPX	EPX
176	UV042821HA11	PIP	Other
177	UV042821HA11	PPS	PPS
178	UV042821HA11	EPX	EPX
179	UV042821HA12	PVC	PVC
180	UV042821HA12	PPS	PPS
181	UV042821HA12	EPX	EPX
182	UV042821HA12	PVDF	Other
183	UV042821HA12	HLAS	Other
184	UV042821HA12	PAR	Other
185	UV042821HA12	PVC	PVC
186	UV042821HA12	PA	PA
187	UV042821HA12	PC	PC
188	UV042821HA12	LS770	LS770
189	UV042821HA12	PI	PI
190	UV042821HA12	EPX	EPX
191	UV042821HA12	PEG	PEG
192	UV042821HA12	PVDF	Other
193	UV042821HA12	PC	PC
194	UV042821HA12	PC	PC
195	UV042821HA12	PPS	PPS
196	UV042821HA22	EPX	EPX
197	UV042821HA22	PC	PC
198	UV042821HA22	PC	PC
199	UV042821HA22	HDPE	Other
200	UV042821HA22	PPS	PPS
201	UV042821HA22	PEG	PEG
202	UV042821HA22	WOIL	Other
203	UV042821HA22	PC	PC
204	UV042821HA22	PC	PC
205	UV042821HA22	PA	PA
206	UV042821HA22	BR3	BR3
207	UV042821HA22	SB	Other
208	UV042821HA22	PI	PI
209	UV042821HA22	BR3	BR3
210	UV042821HA31	PI	PI
211	UV042821HA31	PC	PC
212	UV042821HA31	PMP	Other
213	UV042821HA31	PPS	PPS
214	UV042821HA31	PP	PP
215	UV042821HA31	PA	PA
216	UV042821HA31	EPX	EPX
217	UV042821HA31	PPS	PPS
218	UV042821HA31	PI	PI
219	UV042821HA31	RUBB	RUBB
220	UV042821HA31	PA	PA
221	UV042821HA31	PC	PC
222	UV042821HA31	DLTDP	DLTDP
223	UV042821HA31	PA	PA
224	UV042821HA31	PC	PC
225	UV042821HA31	EPX	EPX
226	UV042821HA31	BR3	BR3
227	UV042821HA31	RUBB	RUBB
228	UV042821HA31	HERB	Other
229	UV042821HA34	PA	PA
230	UV042821HA34	EPX	EPX
231	UV042821HA34	LS770	LS770
232	UV042821HA34	POM	Other
233	UV042821HA34	PC	PC
234	UV042821HA34	SBS	Other
235	UV042821HA34	SI	Other
236	UV042821HA34	PEG	PEG
237	UV042821HA34	EPX	EPX
238	UV042821HA34	IIR	Other
239	UV042821HA34	PSO	Other
240	UV042821HA34	RUBB	RUBB
241	UV042821HA34	PETG	Other
242	UV042821HA34	EVA	Other
243	UV042821HA34	PA	PA
244	UV042821HA46	PVC	PVC
245	UV042821HA46	PES	Other
246	UV042821HA46	PP	PP
247	UV042821HA46	PEPQ	Other
248	UV042821HA46	PPO	Other
249	UV042821HA46	PA	PA
250	UV042821HA46	PI	PI
251	UV042821HA46	PETG	Other
252	UV042821HA46	PS	PS
253	UV042821HA46	PI	PI
254	UV042821HA46	BR3	BR3
255	UV042821HA46	EPX	EPX
256	UV042821HA46	PC	PC
257	UV042821HA46	ARA	Other
258	UV042821HA46	PC	PC
259	UV042821HA46	PET	Other
260	UV042821HA46	EPX	EPX
261	UV042821HA48	EPX	EPX
262	UV042821HA48	EPX	EPX
263	UV042821HA48	PA	PA
264	UV042821HA48	PC	PC
265	UV042821HA48	PVC	PVC
266	UV042821HA48	NYL	Other
267	UV042821HA48	PVC	PVC
268	UV042821HA48	PC	PC
269	UV042821HA48	PEEK	Other
270	UV042821HA48	LDPE	Other
271	UV042821HA48	PAR	Other
272	UV042821HA48	EPX	EPX
273	UV042821HA48	PC	PC
274	UV042821HA48	PAC	Other
275	UV042821HA48	PBT	Other
276	UV042821HA52	PC	PC
277	UV042821HA52	FEP	Other
278	UV042821HA52	PC	PC
279	UV042821HA52	EPX	EPX
280	UV042821HA52	PI	PI
281	UV042821HA52	PMP	Other
282	UV042821HA52	PC	PC
283	UV042821HA52	PC	PC
284	UV042821HA52	PS	PS
285	UV042821HA52	PC	PC
286	UV042821HA52	BR3	BR3
287	UV042821HA52	BR3	BR3
288	UV042821HA52	DLTDP	DLTDP
289	UV042821HA52	PC	PC
290	UV042821HA52	NYL	Other
291	UV042821HA52	PES	Other
292	UV042821HA52	PC	PC
293	UV042821HA52	EPX	EPX

## Sheet: MP by Chemical Chi Sq
Observed
Hailstone	ACR	ARA	BMC	BR3	DLTDP	EPX	EVA	FEP	HDPE	HERB	HLAS	HRB	IIR	LDPE	LS770	MEL	NYL	PA	PAC	PAM	PAP	PAR	PB1	PBT	PC	PCL	PDI	PEEK	PEG	PEI	PEPQ	PES	PET	PETG	PHSI	PI	PIB	PIP	PLT	PMP	POM	PP	PPO	PPS	PS	PSO	PTFE2	PUR	PVC
DR041120HD03	0	0	0	0	0	0	0	0	0	0	0	0	0	0	0	0	0	1	0	0	0	0	0	0	8	0	0	0	0	0	0	0	0	0	0	0	0	0	0	0	0	0	0	0	0	0	1	0	0
DR041120HE02	0	0	1	1	0	0	0	0	0	0	0	0	0	0	0	0	0	0	0	0	0	0	0	0	5	0	0	0	2	1	0	0	0	0	0	0	0	0	0	0	0	0	0	0	0	0	0	1	0
DR041120HG02	0	0	0	0	0	0	0	0	0	0	0	0	0	0	0	0	0	0	0	0	0	0	1	0	3	0	0	2	1	0	0	0	0	0	0	0	0	0	1	0	0	0	0	0	0	0	0	0	0
DR041120HG06	0	0	0	1	0	0	0	0	0	0	0	2	0	1	0	0	0	0	1	0	0	0	0	0	7	0	0	0	0	0	0	1	0	0	0	1	0	0	1	0	0	0	0	0	0	0	0	0	0
DR041120HJ03	0	0	0	1	0	0	0	0	0	0	0	0	0	0	1	0	1	0	0	0	0	0	0	0	1	0	0	0	1	1	0	0	0	0	0	0	0	0	0	0	0	0	0	0	0	0	0	0	0
DR041120HJ28	0	0	0	0	0	1	0	0	1	0	0	0	0	0	0	0	0	0	0	0	0	0	0	0	1	0	0	0	0	0	1		1	0	0	0	0	0	0	0	0	0	0	0	0	0	0	0	0
DR041120HM01	0	0	0	1	0	1	0	0	0	0	1	0	0	0	0	0	0	1	0	0	0	0	0	0	3	0	0	0	0	0	0	0	2	0	0	0	0	0	0	0	0	0	0	1	0	1	0	0	0
DR041120HR01	1	0	0	2	0	0	0	0	0	0	0	0	0	0	0	0	0	0	0	0	1	0	0	0	10	0	0	0	0	0	0	0	0	0	0	0	0	0	1	0	0	1	1	0	1	0	0	0	0
DR041120HT03	0	0	0	1	0	0	0	0	0	0	0	0	0	0	0	0	1	2	1	0	0	0	0	0	3	1	0	0	0	0	0	0	0	0	0	0	0	0	1	0	0	0	0	1	0	0	0	0	1
DR042820HA10	0	0	0	0	0	0	0	0	0	0	0	0	0	0	0	0	0	1	0	0	0	0	0	0	4	0	0	0	0	0	0	0	1	0	0	0	0	0	0	0	0	0	0	0	0	0	0	0	0
DR042821HA32	0	0	0	0	0	2	0	0	0	0	0	1	0	0	0	0	0	0	0	1	0	0	0	1	5	0	0	0	0	0	0	0	0	0	0	2	0	0	1	0	0	0	0	1	1	0	0	0	0
UV042821HA04	0	0	0	1	0	1	0	1	0	0	0	0	0	0	0	1	0	1	0	0	0	0	0	0	11	0	0	0	1	0	0	0	0	0	0	0	1	0	1	0	0	0	0	0	0	0	1	0	0
UV042821HA05	0	0	0	0	1	2	0	0	0	0	0	0	0	1	1	0	0	2	0	1	0	0	0	0	3	0	1	0	1	1	1	0	0	0	1	1	0	0	0	0	0	0	0	2	1	0	0	0	0
UV042821HA11	0	0	0	0	0	2	0	0	0	0	0	0	0	0	0	0	0	1	0	0	0	0	0	0	0	0	0	0	0	0	0	0	0	0	0	0	0	1	0	0	0	1	0	2	1	0	0	0	0
UV042821HA12	0	0	0	0	0	2	0	0	0	0	1	0	0	0	1	0	0	1	0	0	0	1	0	0	3	0	0	0	1	0	0	0	0	0	0	1	0	0	0	0	0	0	0	2	0	0	0	0	2
UV042821HA22	0	0	0	2	0	1	0	0	1	0	0	0	0	0	0	0	0	1	0	0	0	0	0	0	4	0	0	0	1	0	0	0	0	0	0	1	0	0	0	0	0	0	0	1	0	0	0	0	0
UV042821HA31	0	0	0	1	1	2	0	0	0	1	0	0	0	0	0	0	0	3	0	0	0	0	0	0	3	0	0	0	0	0	0	0	0	0	0	2	0	0	0	1	0	1	0	2	0	0	0	0	0
UV042821HA34	0	0	0	0	0	2	1	0	0	0	0	0	1	0	1	0	0	2	0	0	0	0	0	0	1	0	0	0	1	0	0	0	0	1	0	0	0	0	0	0	1	0	0	0	0	1	0	0	0
UV042821HA46	0	1	0	1	0	2	0	0	0	0	0	0	0	0	0	0	0	1	0	0	0	0	0	0	2	0	0	0	0	0	1	1	1	1	0	2	0	0	0	0	0	1	1	0	1	0	0	0	1
UV042821HA48	0	0	0	0	0	3	0	0	0	0	0	0	0	1	0	0	1	1	1	0	0	1		1	3	0	0	1	0	0	0	0	0	0	0	0	0	0	0	0	0	0	0	0	0	0	0	0	2
UV042821HA52	0	0	0	2	1	2	0	1	0	0	0	0	0	0	0	0	1	0	0	0	0	0	0	0	7	0	0	0	0	0	0	1	0	0	0	1	0	0	0	1	0	0	0	0	1	0	0	0	0
Total	1	1	1	14	3	23	1	2	2	1	2	3	1	3	4	1	4	18	3	2	1	2	1	2	87	1	1	3	9	3	3	3	5	2	1	11	1	1	6	2	1	4	2	12	6	2	2	1	6
Expected
	ACR	ARA	BMC	BR3	DLTDP	EPX	EVA	FEP	HDPE	HERB	HLAS	HRB	IIR	LDPE	LS770	MEL	NYL	PA	PAC	PAM	PAP	PAR	PB1	PBT	PC	PCL	PDI	PEEK	PEG	PEI	PEPQ	PES	PET	PETG	PHSI	PI	PIB	PIP	PLT	PMP	POM	PP	PPO	PPS	PS	PSO	PTFE2	PUR	PVC
DR041120HD03	0.0409556	0.0409556	0.0409556	0.573379	0.122867	0.94198	0.0409556	0.0819113	0.0819113	0.0409556	0.0819113	0.122867	0.0409556	0.122867	0.163823	0.0409556	0.163823	0.737201	0.122867	0.0819113	0.0409556	0.0819113	0.0409556	0.0819113	3.56314	0.0409556	0.0409556	0.122867	0.368601	0.122867	0.122867	0.122867	0.204778	0.0819113	0.0409556	0.450512	0.0409556	0.0409556	0.245734	0.0819113	0.0409556	0.163823	0.0819113	0.491468	0.245734	0.0819113	0.0819113	0.0409556	0.245734
DR041120HE02	0.0409556	0.0409556	0.0409556	0.573379	0.122867	0.94198	0.0409556	0.0819113	0.0819113	0.0409556	0.0819113	0.122867	0.0409556	0.122867	0.163823	0.0409556	0.163823	0.737201	0.122867	0.0819113	0.0409556	0.0819113	0.0409556	0.0819113	3.56314	0.0409556	0.0409556	0.122867	0.368601	0.122867	0.122867	0.122867	0.204778	0.0819113	0.0409556	0.450512	0.0409556	0.0409556	0.245734	0.0819113	0.0409556	0.163823	0.0819113	0.491468	0.245734	0.0819113	0.0819113	0.0409556	0.245734
DR041120HG02	0.0341297	0.0341297	0.0341297	0.477816	0.102389	0.784983	0.0341297	0.0682594	0.0682594	0.0341297	0.0682594	0.102389	0.0341297	0.102389	0.136519	0.0341297	0.136519	0.614334	0.102389	0.0682594	0.0341297	0.0682594	0.0341297	0.0682594	2.96928	0.0341297	0.0341297	0.102389	0.307167	0.102389	0.102389	0.102389	0.170648	0.0682594	0.0341297	0.375427	0.0341297	0.0341297	0.204778	0.0682594	0.0341297	0.136519	0.0682594	0.409556	0.204778	0.0682594	0.0682594	0.0341297	0.204778
DR041120HG06	0.0648464	0.0648464	0.0648464	0.90785	0.194539	1.49147	0.0648464	0.129693	0.129693	0.0648464	0.129693	0.194539	0.0648464	0.194539	0.259386	0.0648464	0.259386	1.16724	0.194539	0.129693	0.0648464	0.129693	0.0648464	0.129693	5.64164	0.0648464	0.0648464	0.194539	0.583618	0.194539	0.194539	0.194539	0.324232	0.129693	0.0648464	0.713311	0.0648464	0.0648464	0.389078	0.129693	0.0648464	0.259386	0.129693	0.778157	0.389078	0.129693	0.129693	0.0648464	0.389078
DR041120HJ03	0.0238908	0.0238908	0.0238908	0.334471	0.0716724	0.549488	0.0238908	0.0477816	0.0477816	0.0238908	0.0477816	0.0716724	0.0238908	0.0716724	0.0955631	0.0238908	0.0955631	0.430034	0.0716724	0.0477816	0.0238908	0.0477816	0.0238908	0.0477816	2.0785	0.0238908	0.0238908	0.0716724	0.215017	0.0716724	0.0716724	0.0716724	0.119454	0.0477816	0.0238908	0.262799	0.0238908	0.0238908	0.143345	0.0477816	0.0238908	0.0955631	0.0477816	0.286689	0.143345	0.0477816	0.0477816	0.0238908	0.143345
DR041120HJ28	0.0170648	0.0170648	0.0170648	0.238908	0.0511945	0.392491	0.0170648	0.0341297	0.0341297	0.0170648	0.0341297	0.0511945	0.0170648	0.0511945	0.0682594	0.0170648	0.0682594	0.307167	0.0511945	0.0341297	0.0170648	0.0341297	0.0170648	0.0341297	1.48464	0.0170648	0.0170648	0.0511945	0.153584	0.0511945	0.0511945	0.0511945	0.0853242	0.0341297	0.0170648	0.187713	0.0170648	0.0170648	0.102389	0.0341297	0.0170648	0.0682594	0.0341297	0.204778	0.102389	0.0341297	0.0341297	0.0170648	0.102389
DR041120HM01	0.0375427	0.0375427	0.0375427	0.525597	0.112628	0.863481	0.0375427	0.0750853	0.0750853	0.0375427	0.0750853	0.112628	0.0375427	0.112628	0.150171	0.0375427	0.150171	0.675768	0.112628	0.0750853	0.0375427	0.0750853	0.0375427	0.0750853	3.26621	0.0375427	0.0375427	0.112628	0.337884	0.112628	0.112628	0.112628	0.187713	0.0750853	0.0375427	0.412969	0.0375427	0.0375427	0.225256	0.0750853	0.0375427	0.150171	0.0750853	0.450512	0.225256	0.0750853	0.0750853	0.0375427	0.225256
DR041120HR01	0.0614334	0.0614334	0.0614334	0.860068	0.1843	1.41297	0.0614334	0.122867	0.122867	0.0614334	0.122867	0.1843	0.0614334	0.1843	0.245734	0.0614334	0.245734	1.1058	0.1843	0.122867	0.0614334	0.122867	0.0614334	0.122867	5.34471	0.0614334	0.0614334	0.1843	0.552901	0.1843	0.1843	0.1843	0.307167	0.122867	0.0614334	0.675768	0.0614334	0.0614334	0.368601	0.122867	0.0614334	0.245734	0.122867	0.737201	0.368601	0.122867	0.122867	0.0614334	0.368601
DR041120HT03	0.0443686	0.0443686	0.0443686	0.62116	0.133106	1.02048	0.0443686	0.0887372	0.0887372	0.0443686	0.0887372	0.133106	0.0443686	0.133106	0.177474	0.0443686	0.177474	0.798635	0.133106	0.0887372	0.0443686	0.0887372	0.0443686	0.0887372	3.86007	0.0443686	0.0443686	0.133106	0.399317	0.133106	0.133106	0.133106	0.221843	0.0887372	0.0443686	0.488055	0.0443686	0.0443686	0.266212	0.0887372	0.0443686	0.177474	0.0887372	0.532423	0.266212	0.0887372	0.0887372	0.0443686	0.266212
DR042820HA10	0.0238908	0.0238908	0.0238908	0.334471	0.0716724	0.549488	0.0238908	0.0477816	0.0477816	0.0238908	0.0477816	0.0716724	0.0238908	0.0716724	0.0955631	0.0238908	0.0955631	0.430034	0.0716724	0.0477816	0.0238908	0.0477816	0.0238908	0.0477816	2.0785	0.0238908	0.0238908	0.0716724	0.215017	0.0716724	0.0716724	0.0716724	0.119454	0.0477816	0.0238908	0.262799	0.0238908	0.0238908	0.143345	0.0477816	0.0238908	0.0955631	0.0477816	0.286689	0.143345	0.0477816	0.0477816	0.0238908	0.143345
DR042821HA32	0.0511945	0.0511945	0.0511945	0.716724	0.153584	1.17747	0.0511945	0.102389	0.102389	0.0511945	0.102389	0.153584	0.0511945	0.153584	0.204778	0.0511945	0.204778	0.921502	0.153584	0.102389	0.0511945	0.102389	0.0511945	0.102389	4.45392	0.0511945	0.0511945	0.153584	0.460751	0.153584	0.153584	0.153584	0.255973	0.102389	0.0511945	0.56314	0.0511945	0.0511945	0.307167	0.102389	0.0511945	0.204778	0.102389	0.614334	0.307167	0.102389	0.102389	0.0511945	0.307167
UV042821HA04	0.0682594	0.0682594	0.0682594	0.955631	0.204778	1.56997	0.0682594	0.136519	0.136519	0.0682594	0.136519	0.204778	0.0682594	0.204778	0.273038	0.0682594	0.273038	1.22867	0.204778	0.136519	0.0682594	0.136519	0.0682594	0.136519	5.93857	0.0682594	0.0682594	0.204778	0.614334	0.204778	0.204778	0.204778	0.341297	0.136519	0.0682594	0.750853	0.0682594	0.0682594	0.409556	0.136519	0.0682594	0.273038	0.136519	0.819113	0.409556	0.136519	0.136519	0.0682594	0.409556
UV042821HA05	0.0716724	0.0716724	0.0716724	1.00341	0.215017	1.64846	0.0716724	0.143345	0.143345	0.0716724	0.143345	0.215017	0.0716724	0.215017	0.286689	0.0716724	0.286689	1.2901	0.215017	0.143345	0.0716724	0.143345	0.0716724	0.143345	6.23549	0.0716724	0.0716724	0.215017	0.645051	0.215017	0.215017	0.215017	0.358362	0.143345	0.0716724	0.788396	0.0716724	0.0716724	0.430034	0.143345	0.0716724	0.286689	0.143345	0.860068	0.430034	0.143345	0.143345	0.0716724	0.430034
UV042821HA11	0.0273038	0.0273038	0.0273038	0.382253	0.0819113	0.627986	0.0273038	0.0546075	0.0546075	0.0273038	0.0546075	0.0819113	0.0273038	0.0819113	0.109215	0.0273038	0.109215	0.491468	0.0819113	0.0546075	0.0273038	0.0546075	0.0273038	0.0546075	2.37543	0.0273038	0.0273038	0.0819113	0.245734	0.0819113	0.0819113	0.0819113	0.136519	0.0546075	0.0273038	0.300341	0.0273038	0.0273038	0.163823	0.0546075	0.0273038	0.109215	0.0546075	0.327645	0.163823	0.0546075	0.0546075	0.0273038	0.163823
UV042821HA12	0.0580205	0.0580205	0.0580205	0.812287	0.174061	1.33447	0.0580205	0.116041	0.116041	0.0580205	0.116041	0.174061	0.0580205	0.174061	0.232082	0.0580205	0.232082	1.04437	0.174061	0.116041	0.0580205	0.116041	0.0580205	0.116041	5.04778	0.0580205	0.0580205	0.174061	0.522184	0.174061	0.174061	0.174061	0.290102	0.116041	0.0580205	0.638225	0.0580205	0.0580205	0.348123	0.116041	0.0580205	0.232082	0.116041	0.696246	0.348123	0.116041	0.116041	0.0580205	0.348123
UV042821HA22	0.0477816	0.0477816	0.0477816	0.668942	0.143345	1.09898	0.0477816	0.0955631	0.0955631	0.0477816	0.0955631	0.143345	0.0477816	0.143345	0.191126	0.0477816	0.191126	0.860068	0.143345	0.0955631	0.0477816	0.0955631	0.0477816	0.0955631	4.157	0.0477816	0.0477816	0.143345	0.430034	0.143345	0.143345	0.143345	0.238908	0.0955631	0.0477816	0.525597	0.0477816	0.0477816	0.286689	0.0955631	0.0477816	0.191126	0.0955631	0.573379	0.286689	0.0955631	0.0955631	0.0477816	0.286689
UV042821HA31	0.0648464	0.0648464	0.0648464	0.90785	0.194539	1.49147	0.0648464	0.129693	0.129693	0.0648464	0.129693	0.194539	0.0648464	0.194539	0.259386	0.0648464	0.259386	1.16724	0.194539	0.129693	0.0648464	0.129693	0.0648464	0.129693	5.64164	0.0648464	0.0648464	0.194539	0.583618	0.194539	0.194539	0.194539	0.324232	0.129693	0.0648464	0.713311	0.0648464	0.0648464	0.389078	0.129693	0.0648464	0.259386	0.129693	0.778157	0.389078	0.129693	0.129693	0.0648464	0.389078
UV042821HA34	0.0511945	0.0511945	0.0511945	0.716724	0.153584	1.17747	0.0511945	0.102389	0.102389	0.0511945	0.102389	0.153584	0.0511945	0.153584	0.204778	0.0511945	0.204778	0.921502	0.153584	0.102389	0.0511945	0.102389	0.0511945	0.102389	4.45392	0.0511945	0.0511945	0.153584	0.460751	0.153584	0.153584	0.153584	0.255973	0.102389	0.0511945	0.56314	0.0511945	0.0511945	0.307167	0.102389	0.0511945	0.204778	0.102389	0.614334	0.307167	0.102389	0.102389	0.0511945	0.307167
UV042821HA46	0.0580205	0.0580205	0.0580205	0.812287	0.174061	1.33447	0.0580205	0.116041	0.116041	0.0580205	0.116041	0.174061	0.0580205	0.174061	0.232082	0.0580205	0.232082	1.04437	0.174061	0.116041	0.0580205	0.116041	0.0580205	0.116041	5.04778	0.0580205	0.0580205	0.174061	0.522184	0.174061	0.174061	0.174061	0.290102	0.116041	0.0580205	0.638225	0.0580205	0.0580205	0.348123	0.116041	0.0580205	0.232082	0.116041	0.696246	0.348123	0.116041	0.116041	0.0580205	0.348123
UV042821HA48	0.0511945	0.0511945	0.0511945	0.716724	0.153584	1.17747	0.0511945	0.102389	0.102389	0.0511945	0.102389	0.153584	0.0511945	0.153584	0.204778	0.0511945	0.204778	0.921502	0.153584	0.102389	0.0511945	0.102389	0.0511945	0.102389	4.45392	0.0511945	0.0511945	0.153584	0.460751	0.153584	0.153584	0.153584	0.255973	0.102389	0.0511945	0.56314	0.0511945	0.0511945	0.307167	0.102389	0.0511945	0.204778	0.102389	0.614334	0.307167	0.102389	0.102389	0.0511945	0.307167
UV042821HA52	0.0614334	0.0614334	0.0614334	0.860068	0.1843	1.41297	0.0614334	0.122867	0.122867	0.0614334	0.122867	0.1843	0.0614334	0.1843	0.245734	0.0614334	0.245734	1.1058	0.1843	0.122867	0.0614334	0.122867	0.0614334	0.122867	5.34471	0.0614334	0.0614334	0.1843	0.552901	0.1843	0.1843	0.1843	0.307167	0.122867	0.0614334	0.675768	0.0614334	0.0614334	0.368601	0.122867	0.0614334	0.245734	0.122867	0.737201	0.368601	0.122867	0.122867	0.0614334	0.368601
Total	1	1	1	14	3	23	1	2	2	1	2	3	1	3	4	1	4	18	3	2	1	2	1	2	87	1	1	3	9	3	3	3	5	2	1	11	1	1	6	2	1	4	2	12	6	2	2	1	6
	1	1	1	14	3	23	1	2	2	1	2	3	1	3	4	1	4	18	3	2	1	2	1	2	87	1	1	3	9	3	3	3	5	2	1	11	1	1	6	2	1	4	2	12	6	2	2	1	6
Chi Square
	ACR	ARA	BMC	BR3	DLTDP	EPX	EVA	FEP	HDPE	HERB	HLAS	HRB	IIR	LDPE	LS770	MEL	NYL	PA	PAC	PAM	PAP	PAR	PB1	PBT	PC	PCL	PDI	PEEK	PEG	PEI	PEPQ	PES	PET	PETG	PHSI	PI	PIB	PIP	PLT	PMP	POM	PP	PPO	PPS	PS	PSO	PTFE2	PUR	PVC
DR041120HD03	0.0409556	0.0409556	0.0409556	0.573379	0.122867	0.94198	0.0409556	0.0819113	0.0819113	0.0409556	0.0819113	0.122867	0.0409556	0.122867	0.163823	0.0409556	0.163823	0.0936828	0.122867	0.0819113	0.0409556	0.0819113	0.0409556	0.0819113	5.52483	0.0409556	0.0409556	0.122867	0.368601	0.122867	0.122867	0.122867	0.204778	0.0819113	0.0409556	0.450512	0.0409556	0.0409556	0.245734	0.0819113	0.0409556	0.163823	0.0819113	0.491468	0.245734	0.0819113	10.2902	0.0409556	0.245734
DR041120HE02	0.0409556	0.0409556	22.4576	0.317426	0.122867	0.94198	0.0409556	0.0819113	0.0819113	0.0409556	0.0819113	0.122867	0.0409556	0.122867	0.163823	0.0409556	0.163823	0.737201	0.122867	0.0819113	0.0409556	0.0819113	0.0409556	0.0819113	0.579423	0.0409556	0.0409556	0.122867	7.22045	6.26176	0.122867	0.122867	0.204778	0.0819113	0.0409556	0.450512	0.0409556	0.0409556	0.245734	0.0819113	0.0409556	0.163823	0.0819113	0.491468	0.245734	0.0819113	0.0819113	22.4576	0.245734
DR041120HG02	0.0341297	0.0341297	0.0341297	0.477816	0.102389	0.784983	0.0341297	0.0682594	0.0682594	0.0341297	0.0682594	0.102389	0.0341297	0.102389	0.136519	0.0341297	0.136519	0.614334	0.102389	0.0682594	0.0341297	0.0682594	27.3341	0.0682594	0.000317759	0.0341297	0.0341297	35.1691	1.56272	0.102389	0.102389	0.102389	0.170648	0.0682594	0.0341297	0.375427	0.0341297	0.0341297	3.08811	0.0682594	0.0341297	0.136519	0.0682594	0.409556	0.204778	0.0682594	0.0682594	0.0341297	0.204778
DR041120HG06	0.0648464	0.0648464	0.0648464	0.00935359	0.194539	1.49147	0.0648464	0.129693	0.129693	0.0648464	0.129693	16.7559	0.0648464	3.33489	0.259386	0.0648464	0.259386	1.16724	3.33489	0.129693	0.0648464	0.129693	0.0648464	0.129693	0.327059	0.0648464	0.0648464	0.194539	0.583618	0.194539	0.194539	3.33489	0.324232	0.129693	0.0648464	0.115224	0.0648464	0.0648464	0.959254	0.129693	0.0648464	0.259386	0.129693	0.778157	0.389078	0.129693	0.129693	0.0648464	0.389078
DR041120HJ03	0.0238908	0.0238908	0.0238908	1.32427	0.0716724	0.549488	0.0238908	0.0477816	0.0477816	0.0238908	0.0477816	0.0716724	0.0238908	0.0716724	8.55985	0.0238908	8.55985	0.430034	0.0716724	0.0477816	0.0238908	0.0477816	0.0238908	0.0477816	0.559615	0.0238908	0.0238908	0.0716724	2.86581	12.0241	0.0716724	0.0716724	0.119454	0.0477816	0.0238908	0.262799	0.0238908	0.0238908	0.143345	0.0477816	0.0238908	0.0955631	0.0477816	0.286689	0.143345	0.0477816	0.0477816	0.0238908	0.143345
DR041120HJ28	0.0170648	0.0170648	0.0170648	0.238908	0.0511945	0.940318	0.0170648	0.0341297	27.3341	0.0170648	0.0341297	0.0511945	0.0170648	0.0511945	0.0682594	0.0170648	0.0682594	0.307167	0.0511945	0.0341297	0.0170648	0.0341297	0.0170648	0.0341297	0.158205	0.0170648	0.0170648	0.0511945	0.153584	0.0511945	17.5845	0.0511945	9.80532	0.0341297	0.0170648	0.187713	0.0170648	0.0170648	0.102389	0.0341297	0.0170648	0.0682594	0.0341297	0.204778	0.102389	0.0341297	0.0341297	0.0170648	0.102389
DR041120HM01	0.0375427	0.0375427	0.0375427	0.428195	0.112628	0.021584	0.0375427	0.0750853	0.0750853	0.0375427	11.3933	0.112628	0.0375427	0.112628	0.150171	0.0375427	0.150171	0.155566	0.112628	0.0750853	0.0375427	0.0750853	0.0375427	0.0750853	0.0216975	0.0375427	0.0375427	0.112628	0.337884	0.112628	0.112628	0.112628	17.4968	0.0750853	0.0375427	0.412969	0.0375427	0.0375427	0.225256	0.0750853	0.0375427	0.150171	0.0750853	0.670209	0.225256	11.3933	0.0750853	0.0375427	0.225256
DR041120HR01	14.3392	0.0614334	0.0614334	1.51086	0.1843	1.41297	0.0614334	0.122867	0.122867	0.0614334	0.122867	0.1843	0.0614334	0.1843	0.245734	0.0614334	0.245734	1.1058	0.1843	0.122867	14.3392	0.122867	0.0614334	0.122867	4.0548	0.0614334	0.0614334	0.1843	0.552901	0.1843	0.1843	0.1843	0.307167	0.122867	0.0614334	0.675768	0.0614334	0.0614334	1.08156	0.122867	0.0614334	2.31518	6.26176	0.737201	1.08156	0.122867	0.122867	0.0614334	0.368601
DR041120HT03	0.0443686	0.0443686	0.0443686	0.231051	0.133106	1.02048	0.0443686	0.0887372	0.0887372	0.0443686	0.0887372	0.133106	0.0443686	0.133106	0.177474	0.0443686	3.81209	1.80718	5.64593	0.0887372	0.0443686	0.0887372	0.0443686	0.0887372	0.191633	20.5828	0.0443686	0.133106	0.399317	0.133106	0.133106	0.133106	0.221843	0.0887372	0.0443686	0.488055	0.0443686	0.0443686	2.02262	0.0887372	0.0443686	0.177474	0.0887372	0.410628	0.266212	0.0887372	0.0887372	0.0443686	2.02262
DR042820HA10	0.0238908	0.0238908	0.0238908	0.334471	0.0716724	0.549488	0.0238908	0.0477816	0.0477816	0.0238908	0.0477816	0.0716724	0.0238908	0.0716724	0.0955631	0.0238908	0.0955631	0.755431	0.0716724	0.0477816	0.0238908	0.0477816	0.0238908	0.0477816	1.77636	0.0238908	0.0238908	0.0716724	0.215017	0.0716724	0.0716724	0.0716724	6.49088	0.0477816	0.0238908	0.262799	0.0238908	0.0238908	0.143345	0.0477816	0.0238908	0.0955631	0.0477816	0.286689	0.143345	0.0477816	0.0477816	0.0238908	0.143345
DR042821HA32	0.0511945	0.0511945	0.0511945	0.716724	0.153584	0.574576	0.0511945	0.102389	0.102389	0.0511945	0.102389	4.66469	0.0511945	0.153584	0.204778	0.0511945	0.204778	0.921502	0.153584	7.86906	0.0511945	0.102389	0.0511945	7.86906	0.0669517	0.0511945	0.0511945	0.153584	0.460751	0.153584	0.153584	0.153584	0.255973	0.102389	0.0511945	3.66617	0.0511945	0.0511945	1.56272	0.102389	0.0511945	0.204778	0.102389	0.242112	1.56272	0.102389	0.102389	0.0511945	0.307167
UV042821HA04	0.0682594	0.0682594	0.0682594	0.00205997	0.204778	0.206922	0.0682594	5.46152	0.136519	0.0682594	0.136519	0.204778	0.0682594	0.204778	0.273038	12.7183	0.273038	0.0425578	0.204778	0.136519	0.0682594	0.136519	0.0682594	0.136519	4.31385	0.0682594	0.0682594	0.204778	0.242112	0.204778	0.204778	0.204778	0.341297	0.136519	0.0682594	0.750853	12.7183	0.0682594	0.851223	0.136519	0.0682594	0.273038	0.136519	0.819113	0.409556	0.136519	5.46152	0.0682594	0.409556
UV042821HA05	0.0716724	0.0716724	0.0716724	1.00341	2.86581	0.0749652	0.0716724	0.143345	0.143345	0.0716724	0.143345	0.215017	0.0716724	2.86581	1.77478	0.0716724	0.286689	0.390631	0.215017	5.11954	0.0716724	0.143345	0.0716724	0.143345	1.67884	0.0716724	12.0241	0.215017	0.195316	2.86581	2.86581	0.215017	0.358362	0.143345	12.0241	0.0567942	0.0716724	0.0716724	0.430034	0.143345	0.0716724	0.286689	0.143345	1.51086	0.755431	0.143345	0.143345	0.0716724	0.430034
UV042821HA11	0.0273038	0.0273038	0.0273038	0.382253	0.0819113	2.99755	0.0273038	0.0546075	0.0546075	0.0273038	0.0546075	0.0819113	0.0273038	0.0819113	0.109215	0.0273038	0.109215	0.52619	0.0819113	0.0546075	0.0273038	0.0546075	0.0273038	0.0546075	2.37543	0.0273038	0.0273038	0.0819113	0.245734	0.0819113	0.0819113	0.0819113	0.136519	0.0546075	0.0273038	0.300341	0.0273038	34.6523	0.163823	0.0546075	0.0273038	7.26547	0.0546075	8.53598	4.26799	0.0546075	0.0546075	0.0273038	0.163823
UV042821HA12	0.0580205	0.0580205	0.0580205	0.812287	0.174061	0.331913	0.0580205	0.116041	0.116041	0.0580205	6.73369	0.174061	0.0580205	0.174061	2.54091	0.0580205	0.232082	0.00188494	0.174061	0.116041	0.0580205	6.73369	0.0580205	0.116041	0.830743	0.0580205	0.0580205	0.174061	0.437217	0.174061	0.174061	0.174061	0.290102	0.116041	0.0580205	0.20507	0.0580205	0.0580205	0.348123	0.116041	0.0580205	0.232082	0.116041	2.44134	0.348123	0.116041	0.116041	0.0580205	7.83832
UV042821HA22	0.0477816	0.0477816	0.0477816	2.64853	0.143345	0.008914	0.0477816	0.0955631	8.55985	0.0477816	0.0955631	0.143345	0.0477816	0.143345	0.191126	0.0477816	0.191126	0.0227667	0.143345	0.0955631	0.0477816	0.0955631	0.0477816	0.0955631	0.00592926	0.0477816	0.0477816	0.143345	0.755431	0.143345	0.143345	0.143345	0.238908	0.0955631	0.0477816	0.428195	0.0477816	0.0477816	0.286689	0.0955631	0.0477816	0.191126	0.0955631	0.317426	0.286689	0.0955631	0.0955631	0.0477816	0.286689
UV042821HA31	0.0648464	0.0648464	0.0648464	0.00935359	3.33489	0.17339	0.0648464	0.129693	0.129693	13.4859	0.129693	0.194539	0.0648464	0.194539	0.259386	0.0648464	0.259386	2.87776	0.194539	0.129693	0.0648464	0.129693	0.0648464	0.129693	1.23692	0.0648464	0.0648464	0.194539	0.583618	0.194539	0.194539	0.194539	0.324232	0.129693	0.0648464	2.32097	0.0648464	0.0648464	0.389078	5.84022	0.0648464	2.11465	0.129693	1.91851	0.389078	0.129693	0.129693	0.0648464	0.389078
UV042821HA34	0.0511945	0.0511945	0.0511945	0.716724	0.153584	0.574576	17.5845	0.102389	0.102389	0.0511945	0.102389	0.153584	17.5845	0.153584	3.08811	0.0511945	0.204778	1.26224	0.153584	0.102389	0.0511945	0.102389	0.0511945	0.102389	2.67845	0.0511945	0.0511945	0.153584	0.631121	0.153584	0.153584	0.153584	0.255973	7.86906	0.0511945	0.56314	0.0511945	0.0511945	0.307167	0.102389	17.5845	0.204778	0.102389	0.614334	0.307167	7.86906	0.102389	0.0511945	0.307167
UV042821HA46	0.0580205	15.2933	0.0580205	0.0433791	0.174061	0.331913	0.0580205	0.116041	0.116041	0.0580205	0.116041	0.174061	0.0580205	0.174061	0.232082	0.0580205	0.232082	0.00188494	0.174061	0.116041	0.0580205	0.116041	0.0580205	0.116041	1.84021	0.0580205	0.0580205	0.174061	0.522184	0.174061	3.91916	3.91916	1.73716	6.73369	0.0580205	2.9056	0.0580205	0.0580205	0.348123	0.116041	0.0580205	2.54091	6.73369	0.696246	1.22067	0.116041	0.116041	0.0580205	1.22067
UV042821HA48	0.0511945	0.0511945	0.0511945	0.716724	0.153584	2.82095	0.0511945	0.102389	0.102389	0.0511945	0.102389	0.153584	0.0511945	4.66469	0.204778	0.0511945	3.08811	0.00668689	4.66469	0.102389	0.0511945	7.86906	0.0511945	7.86906	0.474615	0.0511945	0.0511945	4.66469	0.460751	0.153584	0.153584	0.153584	0.255973	0.102389	0.0511945	0.56314	0.0511945	0.0511945	0.307167	0.102389	0.0511945	0.204778	0.102389	0.614334	0.307167	0.102389	0.102389	0.0511945	9.32939
UV042821HA52	0.0614334	0.0614334	0.0614334	1.51086	3.61023	0.243887	0.0614334	6.26176	0.122867	0.0614334	0.122867	0.1843	0.0614334	0.1843	0.245734	0.0614334	2.31518	1.1058	0.1843	0.122867	0.0614334	0.122867	0.0614334	0.122867	0.512654	0.0614334	0.0614334	0.1843	0.552901	0.1843	0.1843	3.61023	0.307167	0.122867	0.0614334	0.155566	0.0614334	0.0614334	0.368601	6.26176	0.0614334	0.245734	0.122867	0.737201	1.08156	0.122867	0.122867	0.0614334	0.368601
Chi Sq Summation	1175.53
df	57
alpha =	0.05
p value	1.42271e-208
[truncated: 10 more columns]

## Sheet: Chem Pearson Regression
Pearson Regression by city Cell A237
	1	2	3	4	5	6	7	8	9	10	11	12	13	14	15	16	17	18	19	20	21	22	23	24	25	26	27	28	29	30	31	32	33	34	35	36	37	38	39	40	41	42	43	44	45	46	47	48	49
Count of Chemical Abbreviation	Column Labels
Row Labels	ACR	ARA	BMC	BR3	DLTDP	EPX	EVA	FEP	HDPE	HERB	HLAS	HRB	IIR	LDPE	LS770	MEL	NYL	PA	PAC	PAM	PAP	PAR	PB1	PBT	PC	PCL	PDI	PEEK	PEG	PEI	PEPQ	PES	PET	PETG	PHSI	PI	PIB	PIP	PLT	PMP	POM	PP	PPO	PPS	PS	PSO	PTFE2	PUR	PVC
DR041120HD03																		1							8																						1
DR041120HE02			1	1																					5				2	1																		1
DR041120HG02																							1		3			2	1										1
DR041120HG06				1								2		1					1						7							1				1			1
DR041120HJ03				1											1		1								1				1	1
DR041120HJ28						1			1																1						1		1
DR041120HM01				1		1					1							1							3								2											1		1
DR041120HR01	1			2																	1				10														1			1	1		1
DR041120HT03				1													1	2	1						3	1													1					1					1
DR042820HA10																		1							4								1
DR042821HA32						2						1								1				1	5											2			1					1	1
UV042821HA04				1		1		1								1		1							11				1								1		1								1
UV042821HA05					1	2								1	1			2		1					3		1		1	1	1				1	1								2	1
UV042821HA11						2												1																				1				1		2	1
UV042821HA12						2					1				1			1				1			3				1							1								2					2
UV042821HA22				2		1			1									1							4				1							1								1
UV042821HA31				1	1	2				1								3							3											2				1		1		2
UV042821HA34						2	1						1		1			2							1				1					1							1					1
UV042821HA46		1		1		2												1							2						1	1	1	1		2						1	1		1				1
UV042821HA48						3								1			1	1	1			1		1	3			1																					2
UV042821HA52				2	1	2		1									1								7							1				1				1					1
Grand Total	1	1	1	14	3	23	1	2	2	1	2	3	1	3	4	1	4	18	3	2	1	2	1	2	87	1	1	3	9	3	3	3	5	2	1	11	1	1	6	2	1	4	2	12	6	2	2	1	6
	ACR	ARA	BMC	BR3	DLTDP	EPX	EVA	FEP	HDPE	HERB	HLAS	HRB	IIR	LDPE	LS770	MEL	NYL	PA	PAC	PAM	PAP	PAR	PB1	PBT	PC	PCL	PDI	PEEK	PEG	PEI	PEPQ	PES	PET	PETG	PHSI	PI	PIB	PIP	PLT	PMP	POM	PP	PPO	PPS	PS	PSO	PTFE2	PUR	PVC
DR041120HD03	0	0	0	0	0	0	0	0	0	0	0	0	0	0	0	0	0	1	0	0	0	0	0	0	8	0	0	0	0	0	0	0	0	0	0	0	0	0	0	0	0	0	0	0	0	0	1	0	0
DR041120HE02	0	0	1	1	0	0	0	0	0	0	0	0	0	0	0	0	0	0	0	0	0	0	0	0	5	0	0	0	2	1	0	0	0	0	0	0	0	0	0	0	0	0	0	0	0	0	0	1	0
DR041120HG02	0	0	0	0	0	0	0	0	0	0	0	0	0	0	0	0	0	0	0	0	0	0	1	0	3	0	0	2	1	0	0	0	0	0	0	0	0	0	1	0	0	0	0	0	0	0	0	0	0
DR041120HG06	0	0	0	1	0	0	0	0	0	0	0	2	0	1	0	0	0	0	1	0	0	0	0	0	7	0	0	0	0	0	0	1	0	0	0	1	0	0	1	0	0	0	0	0	0	0	0	0	0
DR041120HJ03	0	0	0	1	0	0	0	0	0	0	0	0	0	0	1	0	1	0	0	0	0	0	0	0	1	0	0	0	1	1	0	0	0	0	0	0	0	0	0	0	0	0	0	0	0	0	0	0	0
DR041120HJ28	0	0	0	0	0	1	0	0	1	0	0	0	0	0	0	0	0	0	0	0	0	0	0	0	1	0	0	0	0	0	1		1	0	0	0	0	0	0	0	0	0	0	0	0	0	0	0	0
DR041120HM01	0	0	0	1	0	1	0	0	0	0	1	0	0	0	0	0	0	1	0	0	0	0	0	0	3	0	0	0	0	0	0	0	2	0	0	0	0	0	0	0	0	0	0	1	0	1	0	0	0
DR041120HR01	1	0	0	2	0	0	0	0	0	0	0	0	0	0	0	0	0	0	0	0	1	0	0	0	10	0	0	0	0	0	0	0	0	0	0	0	0	0	1	0	0	1	1	0	1	0	0	0	0
DR041120HT03	0	0	0	1	0	0	0	0	0	0	0	0	0	0	0	0	1	2	1	0	0	0	0	0	3	1	0	0	0	0	0	0	0	0	0	0	0	0	1	0	0	0	0	1	0	0	0	0	1
DR042820HA10	0	0	0	0	0	0	0	0	0	0	0	0	0	0	0	0	0	1	0	0	0	0	0	0	4	0	0	0	0	0	0	0	1	0	0	0	0	0	0	0	0	0	0	0	0	0	0	0	0
DR042821HA32	0	0	0	0	0	2	0	0	0	0	0	1	0	0	0	0	0	0	0	1	0	0	0	1	5	0	0	0	0	0	0	0	0	0	0	2	0	0	1	0	0	0	0	1	1	0	0	0	0
UV042821HA04	0	0	0	1	0	1	0	1	0	0	0	0	0	0	0	1	0	1	0	0	0	0	0	0	11	0	0	0	1	0	0	0	0	0	0	0	1	0	1	0	0	0	0	0	0	0	1	0	0
UV042821HA05	0	0	0	0	1	2	0	0	0	0	0	0	0	1	1	0	0	2	0	1	0	0	0	0	3	0	1	0	1	1	1	0	0	0	1	1	0	0	0	0	0	0	0	2	1	0	0	0	0
UV042821HA11	0	0	0	0	0	2	0	0	0	0	0	0	0	0	0	0	0	1	0	0	0	0	0	0	0	0	0	0	0	0	0	0	0	0	0	0	0	1	0	0	0	1	0	2	1	0	0	0	0
UV042821HA12	0	0	0	0	0	2	0	0	0	0	1	0	0	0	1	0	0	1	0	0	0	1	0	0	3	0	0	0	1	0	0	0	0	0	0	1	0	0	0	0	0	0	0	2	0	0	0	0	2
UV042821HA22	0	0	0	2	0	1	0	0	1	0	0	0	0	0	0	0	0	1	0	0	0	0	0	0	4	0	0	0	1	0	0	0	0	0	0	1	0	0	0	0	0	0	0	1	0	0	0	0	0
UV042821HA31	0	0	0	1	1	2	0	0	0	1	0	0	0	0	0	0	0	3	0	0	0	0	0	0	3	0	0	0	0	0	0	0	0	0	0	2	0	0	0	1	0	1	0	2	0	0	0	0	0
UV042821HA34	0	0	0	0	0	2	1	0	0	0	0	0	1	0	1	0	0	2	0	0	0	0	0	0	1	0	0	0	1	0	0	0	0	1	0	0	0	0	0	0	1	0	0	0	0	1	0	0	0
UV042821HA46	0	1	0	1	0	2	0	0	0	0	0	0	0	0	0	0	0	1	0	0	0	0	0	0	2	0	0	0	0	0	1	1	1	1	0	2	0	0	0	0	0	1	1	0	1	0	0	0	1
UV042821HA48	0	0	0	0	0	3	0	0	0	0	0	0	0	1	0	0	1	1	1	0	0	1		1	3	0	0	1	0	0	0	0	0	0	0	0	0	0	0	0	0	0	0	0	0	0	0	0	2
UV042821HA52	0	0	0	2	1	2	0	1	0	0	0	0	0	0	0	0	1	0	0	0	0	0	0	0	7	0	0	0	0	0	0	1	0	0	0	1	0	0	0	1	0	0	0	0	1	0	0	0	0
	1	1	1	14	3	23	1	2	2	1	2	3	1	3	4	1	4	18	3	2	1	2	1	2	87	1	1	3	9	3	3	3	5	2	1	11	1	1	6	2	1	4	2	12	6	2	2	1	6
	ACR	ARA	BMC	BR3	DLTDP	EPX	EVA	FEP	HDPE	HERB	HLAS	HRB	IIR	LDPE	LS770	MEL	NYL	PA	PAC	PAM	PAP	PAR	PB1	PBT	PC	PCL	PDI	PEEK	PEG	PEI	PEPQ	PES	PET	PETG	PHSI	PI	PIB	PIP	PLT	PMP	POM	PP	PPO	PPS	PS	PSO	PTFE2	PUR	PVC
ACR	1	-0.05	-0.05	0.41833
ARA	-0.05	1	-0.05
BMC	-0.05	-0.05	1
BR3	0.41833
DLTDP	-0.0912871
EPX
EVA
FEP
HDPE
HERB
HLAS
HRB
IIR
LDPE																																															-0.132453
LS770
MEL
NYL
PA
PAC
PAM
PAP
PAR
PB1
PBT
PC
PCL
PDI
PEEK
PEG
PEI
PEPQ
PES
PET
PETG
PHSI
PI
PIB
PIP
PLT
PMP
POM
PP
PPO
PPS
PS
PSO
PTFE2														-0.132453
PUR
PVC
PVDC
PVDF
RUBB
SB
SBS
SI
SMA
STR
WOIL
	ACR	ARA	BMC	BR3	DLTDP	EPX	EVA	FEP	HDPE	HERB	HLAS	HRB	IIR	LDPE	LS770	MEL	NYL	PA	PAC	PAM	PAP	PAR	PB1	PBT	PC	PCL	PDI	PEEK	PEG	PEI	PEPQ	PES	PET	PETG	PHSI	PI	PIB	PIP	PLT	PMP	POM	PP	PPO	PPS	PS	PSO	PTFE2	PUR	PVC
ACR	1	-0.05	-0.05	0.41833	-0.0912871	-0.252154	-0.05	-0.0725476	-0.0725476	-0.05	-0.0725476	-0.0684653	-0.05	-0.0912871	-0.108465	-0.05	-0.108465	-0.230089	-0.0912871	-0.0725476	1	-0.0725476	-0.0526316	-0.0725476	0.454249	-0.05	-0.05	-0.0684653	-0.164317	-0.0912871	-0.0912871	-0.0963739	-0.101222	-0.0725476	-0.05	-0.160111	-0.05	-0.05	0.353553	-0.0725476	-0.05	0.460977	0.689202	-0.161515	0.353553	-0.0725476	-0.0725476	-0.05	-0.10171
ARA	-0.05	1	-0.05	0.104583	-0.0912871	0.208301	-0.05	-0.0725476	-0.0725476	-0.05	-0.0725476	-0.0684653	-0.05	-0.0912871	-0.108465	-0.05	-0.108465	0.0383482	-0.0912871	-0.0725476	-0.05	-0.0725476	-0.0526316	-0.0725476	-0.166189	-0.05	-0.05	-0.0684653	-0.164317	-0.0912871	0.547723	0.546119	0.323911	0.689202	-0.05	0.451222	-0.05	-0.05	-0.141421	-0.0725476	-0.05	0.460977	0.689202	-0.161515	0.353553	-0.0725476	-0.0725476	-0.05	0.254274
BMC	-0.05	-0.05	1	0.104583	-0.0912871	-0.252154	-0.05	-0.0725476	-0.0725476	-0.05	-0.0725476	-0.0684653	-0.05	-0.0912871	-0.108465	-0.05	-0.108465	-0.230089	-0.0912871	-0.0725476	-0.05	-0.0725476	-0.0526316	-0.0725476	0.0664754	-0.05	-0.05	-0.0684653	0.602495	0.547723	-0.0912871	-0.0963739	-0.101222	-0.0725476	-0.05	-0.160111	-0.05	-0.05	-0.141421	-0.0725476	-0.05	-0.108465	-0.0725476	-0.161515	-0.141421	-0.0725476	-0.0725476	1	-0.10171
BR3	0.41833	0.104583	0.104583	1	0.190941	-0.229312	-0.209165	0.379361	0.151744	0.104583	-0.0758721	0	-0.209165	-0.190941	-0.283589	0.104583	0.226871	-0.160422	-2.64983e-17	-0.303488	0.41833	-0.303488	-0.224872	-0.303488	0.440304	0.104583	-0.209165	-0.286411	-3.81576e-17	-1.05993e-17	-0.190941	0.372549	-0.0423442	-0.0758721	-0.209165	0.152226	0.104583	-0.209165	0.147902	0.379361	-0.209165	0.226871	0.379361	-0.168916	0.147902	-0.0758721	-0.0758721	0.104583	-0.212741
DLTDP	-0.0912871	-0.0912871	-0.0912871	0.190941	1	0.380304	-0.0912871	0.331133	-0.132453	0.547723	-0.132453	-0.125	-0.0912871	0.222222	0.148522	-0.0912871	0.148522	0.396746	-0.166667	0.331133	-0.0912871	-0.132453	-0.0963739	-0.132453	0.0269704	-0.0912871	0.547723	-0.125	-0.0666667	0.222222	0.222222	0.215686	-0.184805	-0.132453	0.547723	0.45177	-0.0912871	-0.0912871	-0.258199	0.794719	-0.0912871	0.148522	-0.132453	0.393179	0.344265	-0.132453	-0.132453	-0.0912871	-0.185695
EPX	-0.252154	0.208301	-0.252154	-0.229312	0.380304	1	0.208301	0.135211	-0.0318142	0.208301	0.135211	-0.135108	0.208301	0.240192	0.202152	-0.0219265	0.0772934	0.36997	-0.040032	0.302235	-0.252154	0.46926	-0.256495	0.46926	-0.327953	-0.252154	0.208301	-0.030024	-0.156125	-0.180144	0.240192	0.0985134	-0.0443888	0.302235	0.208301	0.465962	-0.0219265	0.208301	-0.387609	0.302235	0.208301	0.202152	-0.0318142	0.424973	0.372104	0.135211	-0.198839	-0.252154	0.423724
EVA	-0.05	-0.05	-0.05	-0.209165	-0.0912871	0.208301	1	-0.0725476	-0.0725476	-0.05	-0.0725476	-0.0684653	1	-0.0912871	0.460977	-0.05	-0.108465	0.306786	-0.0912871	-0.0725476	-0.05	-0.0725476	-0.0526316	-0.0725476	-0.243743	-0.05	-0.05	-0.0684653	0.219089	-0.0912871	-0.0912871	-0.0963739	-0.101222	0.689202	-0.05	-0.160111	-0.05	-0.05	-0.141421	-0.0725476	1	-0.108465	-0.0725476	-0.161515	-0.141421	0.689202	-0.0725476	-0.05	-0.10171
FEP	-0.0725476	-0.0725476	-0.0725476	0.379361	0.331133	0.135211	-0.0725476	1	-0.105263	-0.0725476	-0.105263	-0.0993399	-0.0725476	-0.132453	-0.157378	0.689202	0.255739	-0.139104	-0.132453	-0.105263	-0.0725476	-0.105263	-0.0764719	-0.105263	0.546565	-0.0725476	-0.0725476	-0.0993399	0.039736	-0.132453	-0.132453	0.326732	-0.146868	-0.105263	-0.0725476	-0.0105597	0.689202	-0.0725476	0.153897	0.447368	-0.0725476	-0.157378	-0.105263	-0.23435	0.153897	-0.105263	0.447368	-0.0725476	-0.147576
HDPE	-0.0725476	-0.0725476	-0.0725476	0.151744	-0.132453	-0.0318142	-0.0725476	-0.105263	1	-0.0725476	-0.105263	-0.0993399	-0.0725476	-0.132453	-0.157378	-0.0725476	-0.157378	-0.139104	-0.132453	-0.105263	-0.0725476	-0.105263	-0.0764719	-0.105263	-0.184868	-0.0725476	-0.0725476	-0.0993399	0.039736	-0.132453	0.331133	-0.0963739	0.161555	-0.105263	-0.0725476	-0.0105597	-0.0725476	-0.0725476	-0.205196	-0.105263	-0.0725476	-0.157378	-0.105263	-0.0292937	-0.205196	-0.105263	-0.105263	-0.0725476	-0.147576
HERB	-0.05	-0.05	-0.05	0.104583	0.547723	0.208301	-0.05	-0.0725476	-0.0725476	1	-0.0725476	-0.0684653	-0.05	-0.0912871	-0.108465	-0.05	-0.108465	0.575224	-0.0912871	-0.0725476	-0.05	-0.0725476	-0.0526316	-0.0725476	-0.0886339	-0.05	-0.05	-0.0684653	-0.164317	-0.0912871	-0.0912871	-0.0963739	-0.101222	-0.0725476	-0.05	0.451222	-0.05	-0.05	-0.141421	0.689202	-0.05	0.460977	-0.0725476	0.403786	-0.141421	-0.0725476	-0.0725476	-0.05	-0.10171
HLAS	-0.0725476	-0.0725476	-0.0725476	-0.0758721	-0.132453	0.135211	-0.0725476	-0.105263	-0.105263	-0.0725476	1	-0.0993399	-0.0725476	-0.132453	0.255739	-0.0725476	-0.157378	0.0556415	-0.132453	-0.105263	-0.0725476	0.447368	-0.0764719	-0.105263	-0.128604	-0.0725476	-0.0725476	-0.0993399	0.039736	-0.132453	-0.132453	-0.140028	0.469979	-0.105263	-0.0725476	-0.0105597	-0.0725476	-0.0725476	-0.205196	-0.105263	-0.0725476	-0.157378	-0.105263	0.380819	-0.205196	0.447368	-0.105263	-0.0725476	0.368939
HRB	-0.0684653	-0.0684653	-0.0684653	0	-0.125	-0.135108	-0.0684653	-0.0993399	-0.0993399	-0.0684653	-0.0993399	1	-0.0684653	0.458333	-0.148522	-0.0684653	-0.148522	-0.315063	0.458333	0.24835	-0.0684653	-0.0993399	-0.0721479	0.24835	0.23262	-0.0684653	-0.0684653	-0.09375	-0.225	-0.125	-0.125	0.455047	-0.138604	-0.0993399	-0.0684653	0.338827	-0.0684653	-0.0684653	0.484123	-0.0993399	-0.0684653	-0.148522	-0.0993399	-0.0921512	0.0322749	-0.0993399	-0.0993399	-0.0684653	-0.139272
IIR	-0.05	-0.05	-0.05	-0.209165	-0.0912871	0.208301	1	-0.0725476	-0.0725476	-0.05	-0.0725476	-0.0684653	1	-0.0912871	0.460977	-0.05	-0.108465	0.306786	-0.0912871	-0.0725476	-0.05	-0.0725476	-0.0526316	-0.0725476	-0.243743	-0.05	-0.05	-0.0684653	0.219089	-0.0912871	-0.0912871	-0.0963739	-0.101222	0.689202	-0.05	-0.160111	-0.05	-0.05	-0.141421	-0.0725476	1	-0.108465	-0.0725476	-0.161515	-0.141421	0.689202	-0.0725476	-0.05	-0.10171
LDPE	-0.0912871	-0.0912871	-0.0912871	-0.190941	0.222222	0.240192	-0.0912871	-0.132453	-0.132453	-0.0912871	-0.132453	0.458333	-0.0912871	1	0.148522	-0.0912871	0.148522	0.070014	0.611111	0.331133	-0.0912871	0.331133	-0.0764719	0.331133	0.0269704	-0.0912871	0.547723	0.166667	-0.0666667	0.222222	0.222222	0.215686	-0.184805	-0.132453	0.547723	0.0797241	-0.0912871	-0.0912871	0.0430331	-0.132453	-0.0912871	-0.19803	-0.132453	0.0491473	0.0430331	-0.132453	-0.132453	-0.0912871	0.247594
LS770	-0.108465	-0.108465	-0.108465	-0.283589	0.148522	0.202152	0.460977	-0.157378	-0.157378	-0.108465	0.255739	-0.148522	0.460977	0.148522	1	-0.108465	0.0735294	0.22877	-0.19803	0.255739	-0.108465	0.255739	-0.114708	-0.157378	-0.360514	-0.108465	0.460977	-0.148522	0.475271	0.495074	0.148522	-0.210042	-0.219581	0.255739	0.460977	-0.0157877	-0.108465	-0.108465	-0.306786	-0.157378	0.460977	-0.235294	-0.157378	0.262781	-0.0383482	0.255739	-0.157378	-0.108465	0.165479
MEL	-0.05	-0.05	-0.05	0.104583	-0.0912871	-0.0219265	-0.05	0.689202	-0.0725476	-0.05	-0.0725476	-0.0684653	-0.05	-0.0912871	-0.108465	1	-0.108465	0.0383482	-0.0912871	-0.0725476	-0.05	-0.0725476	-0.0526316	-0.0725476	0.531804	-0.05	-0.05	-0.0684653	0.219089	-0.0912871	-0.0912871	-0.0963739	-0.101222	-0.0725476	-0.05	-0.160111	1	-0.05	0.353553	-0.0725476	-0.05	-0.108465	-0.0725476	-0.161515	-0.141421	-0.0725476	0.689202	-0.05	-0.10171
NYL	-0.108465	-0.108465	-0.108465	0.226871	0.148522	0.0772934	-0.108465	0.255739	-0.157378	-0.108465	-0.157378	-0.148522	-0.108465	0.148522	0.0735294	-0.108465	1	-0.0623918	0.495074	-0.157378	-0.108465	0.255739	-0.0963739	0.255739	-0.108154	0.460977	-0.108465	0.111392	-0.148522	0.148522	-0.19803	0.140028	-0.219581	-0.157378	-0.108465	-0.181559	-0.108465	-0.108465	-0.0383482	0.255739	-0.108465	-0.235294	-0.157378	-0.197086	-0.0383482	-0.157378	-0.157378	-0.108465	0.358538
PA	-0.230089	0.0383482	-0.230089	-0.160422	0.396746	0.36997	0.306786	-0.139104	-0.139104	0.575224	0.0556415	-0.315063	0.306786	0.070014	0.22877	0.0383482	-0.0623918	1	0.070014	0.0556415	-0.230089	0.0556415	-0.228626	-0.139104	-0.269084	0.306786	0.306786	-0.192539	-0.070014	-0.093352	0.070014	-0.286576	-0.0310535	0.250387	0.306786	0.200945	0.0383482	0.0383482	-0.271163	0.250387	0.306786	0.22877	-0.139104	0.557442	-0.14462	0.250387	0.0556415	-0.230089	0.169017
PAC	-0.0912871	-0.0912871	-0.0912871	-2.64983e-17	-0.166667	-0.040032	-0.0912871	-0.132453	-0.132453	-0.0912871	-0.132453	0.458333	-0.0912871	0.611111	-0.19803	-0.0912871	0.495074	0.070014	1	-0.132453	-0.0912871	0.331133	-0.0764719	0.331133	0.0269704	0.547723	-0.0912871	0.166667	-0.3	-0.166667	-0.166667	0.215686	-0.184805	-0.132453	-0.0912871	-0.106299	-0.0912871	-0.0912871	0.344265	-0.132453	-0.0912871	-0.19803	-0.132453	-0.122868	-0.258199	-0.132453	-0.132453	-0.0912871	0.464238
PAM	-0.0725476	-0.0725476	-0.0725476	-0.303488	0.331133	0.302235	-0.0725476	-0.105263	-0.105263	-0.0725476	-0.105263	0.24835	-0.0725476	0.331133	0.255739	-0.0725476	-0.157378	0.0556415	-0.132453	1	-0.0725476	-0.105263	-0.0764719	0.447368	-0.0160755	-0.0725476	0.689202	-0.0993399	0.039736	0.331133	0.331133	-0.140028	-0.146868	-0.105263	0.689202	0.432948	-0.0725476	-0.0725476	0.153897	-0.105263	-0.0725476	-0.157378	-0.105263	0.380819	0.512989	-0.105263	-0.105263	-0.0725476	-0.147576
PAP	1	-0.05	-0.05	0.41833	-0.0912871	-0.252154	-0.05	-0.0725476	-0.0725476	-0.05	-0.0725476	-0.0684653	-0.05	-0.0912871	-0.108465	-0.05	-0.108465	-0.230089	-0.0912871	-0.0725476	1	-0.0725476	-0.0526316	-0.0725476	0.454249	-0.05	-0.05	-0.0684653	-0.164317	-0.0912871	-0.0912871	-0.0963739	-0.101222	-0.0725476	-0.05	-0.160111	-0.05	-0.05	0.353553	-0.0725476	-0.05	0.460977	0.689202	-0.161515	0.353553	-0.0725476	-0.0725476	-0.05	-0.10171
PAR	-0.0725476	-0.0725476	-0.0725476	-0.303488	-0.132453	0.46926	-0.0725476	-0.105263	-0.105263	-0.0725476	0.447368	-0.0993399	-0.0725476	0.331133	0.255739	-0.0725476	0.255739	0.0556415	0.331133	-0.105263	-0.0725476	1	-0.0526316	0.447368	-0.128604	-0.0725476	-0.0725476	0.24835	0.039736	-0.132453	-0.132453	-0.140028	-0.146868	-0.105263	-0.0725476	-0.0105597	-0.0725476	-0.0725476	-0.205196	-0.105263	-0.0725476	-0.157378	-0.105263	0.175762	-0.205196	-0.105263	-0.105263	-0.0725476	0.885454
PB1	-0.0526316	-0.0526316	-0.0526316	-0.224872	-0.0963739	-0.256495	-0.0526316	-0.0764719	-0.0764719	-0.0526316	-0.0764719	-0.0721479	-0.0526316	-0.0764719	-0.114708	-0.0526316	-0.0963739	-0.228626	-0.0764719	-0.0764719	-0.0526316	-0.0526316	1	-0.0526316	-0.0935504	-0.0526316	-0.0526316	1	0.214047	-0.0963739	-0.0963739	-0.102062	-0.106966	-0.0764719	-0.0526316	-0.170527	-0.0526316	-0.0526316	0.350438	-0.0764719	-0.0526316	-0.114708	-0.0764719	-0.172062	-0.150188	-0.0764719	-0.0764719	-0.0526316	-0.0899843
PBT	-0.0725476	-0.0725476	-0.0725476	-0.303488	-0.132453	0.46926	-0.0725476	-0.105263	-0.105263	-0.0725476	-0.105263	0.24835	-0.0725476	0.331133	-0.157378	-0.0725476	0.255739	-0.139104	0.331133	0.447368	-0.0725476	0.447368	-0.0526316	1	-0.0160755	-0.0725476	-0.0725476	0.24835	-0.238416	-0.132453	-0.132453	-0.140028	-0.146868	-0.105263	-0.0725476	0.211194	-0.0725476	-0.0725476	0.153897	-0.105263	-0.0725476	-0.157378	-0.105263	-0.0292937	0.153897	-0.105263	-0.105263	-0.0725476	0.368939
PC	0.454249	-0.166189	0.0664754	0.440304	0.0269704	-0.327953	-0.243743	0.546565	-0.184868	-0.0886339	-0.128604	0.23262	-0.243743	0.0269704	-0.360514	0.531804	-0.108154	-0.269084	0.0269704	-0.0160755	0.454249	-0.128604	-0.0935504	-0.0160755	1	-0.0886339	-0.0886339	-0.121367	-0.0364101	-0.161823	-0.303418	0.151497	-0.242236	-0.297396	-0.0886339	-0.0354782	0.531804	-0.321298	0.517058	0.0964527	-0.243743	-0.0660942	0.208981	-0.348944	0.0783421	-0.241132	0.602829	0.0664754	-0.206592
PCL	-0.05	-0.05	-0.05	0.104583	-0.0912871	-0.252154	-0.05	-0.0725476	-0.0725476	-0.05	-0.0725476	-0.0684653	-0.05	-0.0912871	-0.108465	-0.05	0.460977	0.306786	0.547723	-0.0725476	-0.05	-0.0725476	-0.0526316	-0.0725476	-0.0886339	1	-0.05	-0.0684653	-0.164317	-0.0912871	-0.0912871	-0.0963739	-0.101222	-0.0725476	-0.05	-0.160111	-0.05	-0.05	0.353553	-0.0725476	-0.05	-0.108465	-0.0725476	0.121136	-0.141421	-0.0725476	-0.0725476	-0.05	0.254274
PDI	-0.05	-0.05	-0.05	-0.209165	0.547723	0.208301	-0.05	-0.0725476	-0.0725476	-0.05	-0.0725476	-0.0684653	-0.05	0.547723	0.460977	-0.05	-0.108465	0.306786	-0.0912871	0.689202	-0.05	-0.0725476	-0.0526316	-0.0725476	-0.0886339	-0.05	1	-0.0684653	0.219089	0.547723	0.547723	-0.0963739	-0.101222	-0.0725476	1	0.145556	-0.05	-0.05	-0.141421	-0.0725476	-0.05	-0.108465	-0.0725476	0.403786	0.353553	-0.0725476	-0.0725476	-0.05	-0.10171
PEEK	-0.0684653	-0.0684653	-0.0684653	-0.286411	-0.125	-0.030024	-0.0684653	-0.0993399	-0.0993399	-0.0684653	-0.0993399	-0.09375	-0.0684653	0.166667	-0.148522	-0.0684653	0.111392	-0.192539	0.166667	-0.0993399	-0.0684653	0.24835	1	0.24835	-0.121367	-0.0684653	-0.0684653	1	0.125	-0.125	-0.125	-0.13211	-0.138604	-0.0993399	-0.0684653	-0.219241	-0.0684653	-0.0684653	0.258199	-0.0993399	-0.0684653	-0.148522	-0.0993399	-0.221163	-0.193649	-0.0993399	-0.0993399	-0.0684653	0.185695
PEG	-0.164317	-0.164317	0.602495	-3.81576e-17	-0.0666667	-0.156125	0.219089	0.039736	0.039736	-0.164317	0.039736	-0.225	0.219089	-0.0666667	0.475271	0.219089	-0.148522	-0.070014	-0.3	0.039736	-0.164317	0.039736	0.214047	-0.238416	-0.0364101	-0.164317	0.219089	0.125	1	0.633333	-0.0666667	-0.32068	-0.33265	0.039736	0.219089	-0.191338	0.219089	-0.164317	-0.10328	-0.238416	0.219089	-0.356453	-0.238416	-0.0147442	-0.284019	0.039736	0.039736	0.602495	-0.0742781
PEI	-0.0912871	-0.0912871	0.547723	-1.05993e-17	0.222222	-0.180144	-0.0912871	-0.132453	-0.132453	-0.0912871	-0.132453	-0.125	-0.0912871	0.222222	0.495074	-0.0912871	0.148522	-0.093352	-0.166667	0.331133	-0.0912871	-0.132453	-0.0963739	-0.132453	-0.161823	-0.0912871	0.547723	-0.125	0.633333	1	0.222222	-0.176471	-0.184805	-0.132453	0.547723	-0.106299	-0.0912871	-0.0912871	-0.258199	-0.132453	-0.0912871	-0.19803	-0.132453	0.0491473	0.0430331	-0.132453	-0.132453	0.547723	-0.185695
PEPQ	-0.0912871	0.547723	-0.0912871	-0.190941	0.222222	0.240192	-0.0912871	-0.132453	0.331133	-0.0912871	-0.132453	-0.125	-0.0912871	0.222222	0.148522	-0.0912871	-0.19803	0.070014	-0.166667	0.331133	-0.0912871	-0.132453	-0.0963739	-0.132453	-0.303418	-0.0912871	0.547723	-0.125	-0.0666667	0.222222	1	0.326732	0.33265	0.331133	0.547723	0.265747	-0.0912871	-0.0912871	-0.258199	-0.132453	-0.0912871	0.148522	0.331133	0.0491473	0.344265	-0.132453	-0.132453	-0.0912871	0.0309492
PES	-0.0963739	0.546119	-0.0963739	0.372549	0.215686	0.0985134	-0.0963739	0.326732	-0.0963739	-0.0963739	-0.140028	0.455047	-0.0963739	0.215686	-0.210042	-0.0963739	0.140028	-0.286576	0.215686	-0.140028	-0.0963739	-0.140028	-0.102062	-0.140028	0.151497	-0.0963739	-0.0963739	-0.13211	-0.32068	-0.176471	0.326732	1	0.109847	0.326732	-0.0963739	0.444724	-0.0963739	-0.0963739	0.0305566	0.326732	-0.0963739	0.140028	0.326732	-0.315063	0.336123	-0.140028	-0.140028	-0.0963739	0.0218687
PET	-0.101222	0.323911	-0.101222	-0.0423442	-0.184805	-0.0443888	-0.101222	-0.146868	0.161555	-0.101222	0.469979	-0.138604	-0.101222	-0.184805	-0.219581	-0.101222	-0.219581	-0.0310535	-0.184805	-0.146868	-0.101222	-0.146868	-0.106966	-0.146868	-0.242236	-0.101222	-0.101222	-0.138604	-0.33265	-0.184805	0.33265	0.109847	1	0.161555	-0.101222	-0.0766139	-0.101222	-0.101222	-0.286299	-0.146868	-0.101222	0.0109791	0.161555	-0.098093	-0.0858898	0.469979	-0.146868	-0.101222	-0.0617715
PETG	-0.0725476	0.689202	-0.0725476	-0.0758721	-0.132453	0.302235	0.689202	-0.105263	-0.105263	-0.0725476	-0.105263	-0.0993399	0.689202	-0.132453	0.255739	-0.0725476	-0.157378	0.250387	-0.132453	-0.105263	-0.0725476	-0.105263	-0.0764719	-0.105263	-0.297396	-0.0725476	-0.0725476	-0.0993399	0.039736	-0.132453	0.331133	0.326732	0.161555	1	-0.0725476	0.211194	-0.0725476	-0.0725476	-0.205196	-0.105263	0.689202	0.255739	0.447368	-0.23435	0.153897	0.447368	-0.105263	-0.0725476	0.110682
PHSI	-0.05	-0.05	-0.05	-0.209165	0.547723	0.208301	-0.05	-0.0725476	-0.0725476	-0.05	-0.0725476	-0.0684653	-0.05	0.547723	0.460977	-0.05	-0.108465	0.306786	-0.0912871	0.689202	-0.05	-0.0725476	-0.0526316	-0.0725476	-0.0886339	-0.05	1	-0.0684653	0.219089	0.547723	0.547723	-0.0963739	-0.101222	-0.0725476	1	0.145556	-0.05	-0.05	-0.141421	-0.0725476	-0.05	-0.108465	-0.0725476	0.403786	0.353553	-0.0725476	-0.0725476	-0.05	-0.10171
PI	-0.160111	0.451222	-0.160111	0.152226	0.45177	0.465962	-0.160111	-0.0105597	-0.0105597	0.451222	-0.0105597	0.338827	-0.160111	0.0797241	-0.0157877	-0.160111	-0.181559	0.200945	-0.106299	0.432948	-0.160111	-0.0105597	-0.170527	0.211194	-0.0354782	-0.160111	0.145556	-0.219241	-0.191338	-0.106299	0.265747	0.444724	-0.0766139	0.211194	0.145556	1	-0.160111	-0.160111	-0.0205847	0.432948	-0.160111	0.315754	0.211194	0.387904	0.411693	-0.232314	-0.232314	-0.160111	0.0888264
PIB	-0.05	-0.05	-0.05	0.104583	-0.0912871	-0.0219265	-0.05	0.689202	-0.0725476	-0.05	-0.0725476	-0.0684653	-0.05	-0.0912871	-0.108465	1	-0.108465	0.0383482	-0.0912871	-0.0725476	-0.05	-0.0725476	-0.0526316	-0.0725476	0.531804	-0.05	-0.05	-0.0684653	0.219089	-0.0912871	-0.0912871	-0.0963739	-0.101222	-0.0725476	-0.05	-0.160111	1	-0.05	0.353553	-0.0725476	-0.05	-0.108465	-0.0725476	-0.161515	-0.141421	-0.0725476	0.689202	-0.05	-0.10171
PIP	-0.05	-0.05	-0.05	-0.209165	-0.0912871	0.208301	-0.05	-0.0725476	-0.0725476	-0.05	-0.0725476	-0.0684653	-0.05	-0.0912871	-0.108465	-0.05	-0.108465	0.0383482	-0.0912871	-0.0725476	-0.05	-0.0725476	-0.0526316	-0.0725476	-0.321298	-0.05	-0.05	-0.0684653	-0.164317	-0.0912871	-0.0912871	-0.0963739	-0.101222	-0.0725476	-0.05	-0.160111	-0.05	1	-0.141421	-0.0725476	-0.05	0.460977	-0.0725476	0.403786	0.353553	-0.0725476	-0.0725476	-0.05	-0.10171
PLT	0.353553	-0.141421	-0.141421	0.147902	-0.258199	-0.387609	-0.141421	0.153897	-0.205196	-0.141421	-0.205196	0.484123	-0.141421	0.0430331	-0.306786	0.353553	-0.0383482	-0.271163	0.344265	0.153897	0.353553	-0.205196	0.350438	0.153897	0.517058	0.353553	-0.141421	0.258199	-0.10328	-0.258199	-0.258199	0.0305566	-0.286299	-0.205196	-0.141421	-0.0205847	0.353553	-0.141421	1	-0.205196	-0.141421	-0.0383482	0.153897	-0.190347	0.0666667	-0.205196	0.153897	-0.141421	-0.119866
PMP	-0.0725476	-0.0725476	-0.0725476	0.379361	0.794719	0.302235	-0.0725476	0.447368	-0.105263	0.689202	-0.105263	-0.0993399	-0.0725476	-0.132453	-0.157378	-0.0725476	0.255739	0.250387	-0.132453	-0.105263	-0.0725476	-0.105263	-0.0764719	-0.105263	0.0964527	-0.0725476	-0.0725476	-0.0993399	-0.238416	-0.132453	-0.132453	0.326732	-0.146868	-0.105263	-0.0725476	0.432948	-0.0725476	-0.0725476	-0.205196	1	-0.0725476	0.255739	-0.105263	0.175762	0.153897	-0.105263	-0.105263	-0.0725476	-0.147576
POM	-0.05	-0.05	-0.05	-0.209165	-0.0912871	0.208301	1	-0.0725476	-0.0725476	-0.05	-0.0725476	-0.0684653	1	-0.0912871	0.460977	-0.05	-0.108465	0.306786	-0.0912871	-0.0725476	-0.05	-0.0725476	-0.0526316	-0.0725476	-0.243743	-0.05	-0.05	-0.0684653	0.219089	-0.0912871	-0.0912871	-0.0963739	-0.101222	0.689202	-0.05	-0.160111	-0.05	-0.05	-0.141421	-0.0725476	1	-0.108465	-0.0725476	-0.161515	-0.141421	0.689202	-0.0725476	-0.05	-0.10171
PP	0.460977	0.460977	-0.108465	0.226871	0.148522	0.202152	-0.108465	-0.157378	-0.157378	0.460977	-0.157378	-0.148522	-0.108465	-0.19803	-0.235294	-0.108465	-0.235294	0.22877	-0.19803	-0.157378	0.460977	-0.157378	-0.114708	-0.157378	-0.0660942	-0.108465	-0.108465	-0.148522	-0.356453	-0.19803	0.148522	0.140028	0.0109791	0.255739	-0.108465	0.315754	-0.108465	0.460977	-0.0383482	0.255739	-0.108465	1	0.668856	0.262781	0.498527	-0.157378	-0.157378	-0.108465	-0.0275799
PPO	0.689202	0.689202	-0.0725476	0.379361	-0.132453	-0.0318142	-0.0725476	-0.105263	-0.105263	-0.0725476	-0.105263	-0.0993399	-0.0725476	-0.132453	-0.157378	-0.0725476	-0.157378	-0.139104	-0.132453	-0.105263	0.689202	-0.105263	-0.0764719	-0.105263	0.208981	-0.0725476	-0.0725476	-0.0993399	-0.238416	-0.132453	0.331133	0.326732	0.161555	0.447368	-0.0725476	0.211194	-0.0725476	-0.0725476	0.153897	-0.105263	-0.0725476	0.668856	1	-0.23435	0.512989	-0.105263	-0.105263	-0.0725476	0.110682
PPS	-0.161515	-0.161515	-0.161515	-0.168916	0.393179	0.424973	-0.161515	-0.23435	-0.0292937	0.403786	0.380819	-0.0921512	-0.161515	0.0491473	0.262781	-0.161515	-0.197086	0.557442	-0.122868	0.380819	-0.161515	0.175762	-0.172062	-0.0292937	-0.348944	0.121136	0.403786	-0.221163	-0.0147442	0.0491473	0.0491473	-0.315063	-0.098093	-0.23435	0.403786	0.387904	-0.161515	0.403786	-0.190347	0.175762	-0.161515	0.262781	-0.23435	1	0.209381	-0.0292937	-0.23435	-0.161515	0.150586
PS	0.353553	0.353553	-0.141421	0.147902	0.344265	0.372104	-0.141421	0.153897	-0.205196	-0.141421	-0.205196	0.0322749	-0.141421	0.0430331	-0.0383482	-0.141421	-0.0383482	-0.14462	-0.258199	0.512989	0.353553	-0.205196	-0.150188	0.153897	0.0783421	-0.141421	0.353553	-0.193649	-0.284019	0.0430331	0.344265	0.336123	-0.0858898	0.153897	0.353553	0.411693	-0.141421	0.353553	0.0666667	0.153897	-0.141421	0.498527	0.512989	0.209381	1	-0.205196	-0.205196	-0.141421	-0.119866
PSO	-0.0725476	-0.0725476	-0.0725476	-0.0758721	-0.132453	0.135211	0.689202	-0.105263	-0.105263	-0.0725476	0.447368	-0.0993399	0.689202	-0.132453	0.255739	-0.0725476	-0.157378	0.250387	-0.132453	-0.105263	-0.0725476	-0.105263	-0.0764719	-0.105263	-0.241132	-0.0725476	-0.0725476	-0.0993399	0.039736	-0.132453	-0.132453	-0.140028	0.469979	0.447368	-0.0725476	-0.232314	-0.0725476	-0.0725476	-0.205196	-0.105263	0.689202	-0.157378	-0.105263	-0.0292937	-0.205196	1	-0.105263	-0.0725476	-0.147576
PTFE2	-0.0725476	-0.0725476	-0.0725476	-0.0758721	-0.132453	-0.198839	-0.0725476	0.447368	-0.105263	-0.0725476	-0.105263	-0.0993399	-0.0725476	-0.132453	-0.157378	0.689202	-0.157378	0.0556415	-0.132453	-0.105263	-0.0725476	-0.105263	-0.0764719	-0.105263	0.602829	-0.0725476	-0.0725476	-0.0993399	0.039736	-0.132453	-0.132453	-0.140028	-0.146868	-0.105263	-0.0725476	-0.232314	0.689202	-0.0725476	0.153897	-0.105263	-0.0725476	-0.157378	-0.105263	-0.23435	-0.205196	-0.105263	1	-0.0725476	-0.147576
PUR	-0.05	-0.05	1	0.104583	-0.0912871	-0.252154	-0.05	-0.0725476	-0.0725476	-0.05	-0.0725476	-0.0684653	-0.05	-0.0912871	-0.108465	-0.05	-0.108465	-0.230089	-0.0912871	-0.0725476	-0.05	-0.0725476	-0.0526316	-0.0725476	0.0664754	-0.05	-0.05	-0.0684653	0.602495	0.547723	-0.0912871	-0.0963739	-0.101222	-0.0725476	-0.05	-0.160111	-0.05	-0.05	-0.141421	-0.0725476	-0.05	-0.108465	-0.0725476	-0.161515	-0.141421	-0.0725476	-0.0725476	1	-0.10171
PVC	-0.10171	0.254274	-0.10171	-0.212741	-0.185695	0.423724	-0.10171	-0.147576	-0.147576	-0.10171	0.368939	-0.139272	-0.10171	0.247594	0.165479	-0.10171	0.358538	0.169017	0.464238	-0.147576	-0.10171	0.885454	-0.0899843	0.368939	-0.206592	0.254274	-0.10171	0.185695	-0.0742781	-0.185695	0.0309492	0.0218687	-0.0617715	0.110682	-0.10171	0.0888264	-0.10171	-0.10171	-0.119866	-0.147576	-0.10171	-0.0275799	0.110682	0.150586	-0.119866	-0.147576	-0.147576	-0.10171	1
PVDC	-0.05	-0.05	-0.05	0.104583	-0.0912871	-0.252154	-0.05	-0.0725476	-0.0725476	-0.05	-0.0725476	-0.0684653	-0.05	-0.0912871	-0.108465	-0.05	0.460977	0.306786	0.547723	-0.0725476	-0.05	-0.0725476	-0.0526316	-0.0725476	-0.0886339	1	-0.05	-0.0684653	-0.164317	-0.0912871	-0.0912871	-0.0963739	-0.101222	-0.0725476	-0.05	-0.160111	-0.05	-0.05	0.353553	-0.0725476	-0.05	-0.108465	-0.0725476	0.121136	-0.141421	-0.0725476	-0.0725476	-0.05	0.254274
PVDF	-0.0852803	-0.0852803	-0.0852803	-0.222971	-0.1557	-0.0373979	-0.0852803	-0.123738	-0.123738	-0.0852803	0.525885	0.291937	-0.0852803	0.116775	0.300623	-0.0852803	-0.184999	-0.0490552	0.116775	-0.123738	-0.0852803	0.525885	-0.0899843	-0.123738	0.14645	-0.0852803	-0.0852803	-0.116775	0.0467099	-0.1557	-0.1557	0.109847	-0.172645	-0.123738	-0.0852803	0.117924	-0.0852803	-0.0852803	-0.0301511	-0.123738	-0.0852803	-0.184999	-0.123738	0.20661	-0.241209	-0.123738	0.201074	-0.0852803	0.433691
RUBB	-0.130466	-0.130466	-0.130466	-0.136444	0.387069	-0.057213	0.212007	-0.189299	-0.189299	0.554479	-0.189299	0.446619	0.212007	0.387069	0.0884436	-0.130466	-0.28302	0.450282	0.178647	0.0591561	-0.130466	-0.189299	-0.138343	-0.189299	0.072273	-0.130466	0.212007	-0.178647	-0.178647	-0.0297746	-0.0297746	0.16888	-0.125457	0.0591561	0.212007	0.280103	-0.130466	-0.130466	-0.0461266	0.307612	0.212007	0.0884436	-0.189299	0.131701	-0.20757	0.0591561	0.0591561	-0.130466	-0.265392
SB	-0.05	-0.05	-0.05	0.41833	-0.0912871	-0.0219265	-0.05	-0.0725476	0.689202	-0.05	-0.0725476	-0.0684653	-0.05	-0.0912871	-0.108465	-0.05	-0.108465	0.0383482	-0.0912871	-0.0725476	-0.05	-0.0725476	-0.0526316	-0.0725476	-0.0110792	-0.05	-0.05	-0.0684653	0.219089	-0.0912871	-0.0912871	-0.0963739	-0.101222	-0.0725476	-0.05	0.145556	-0.05	-0.05	-0.141421	-0.0725476	-0.05	-0.108465	-0.0725476	0.121136	-0.141421	-0.0725476	-0.0725476	-0.05	-0.10171
SBS	-0.05	-0.05	-0.05	-0.209165	-0.0912871	0.208301	1	-0.0725476	-0.0725476	-0.05	-0.0725476	-0.0684653	1	-0.0912871	0.460977	-0.05	-0.108465	0.306786	-0.0912871	-0.0725476	-0.05	-0.0725476	-0.0526316	-0.0725476	-0.243743	-0.05	-0.05	-0.0684653	0.219089	-0.0912871	-0.0912871	-0.0963739	-0.101222	0.689202	-0.05	-0.160111	-0.05	-0.05	-0.141421	-0.0725476	1	-0.108465	-0.0725476	-0.161515	-0.141421	0.689202	-0.0725476	-0.05	-0.10171
SI	-0.0852803	-0.0852803	0.362441	-0.222971	-0.1557	-0.233737	0.362441	-0.123738	-0.123738	-0.0852803	-0.123738	-0.116775	0.362441	-0.1557	0.0578122	-0.0852803	-0.184999	-0.163517	-0.1557	-0.123738	-0.0852803	-0.123738	0.809858	-0.123738	-0.151175	-0.0852803	-0.0852803	0.700649	0.537164	0.116775	-0.1557	-0.164771	-0.172645	0.201074	-0.0852803	-0.273087	-0.0852803	-0.0852803	0.180907	-0.123738	0.362441	-0.184999	-0.123738	-0.27548	-0.241209	0.201074	-0.123738	0.362441	-0.173476
SMA	-0.05	-0.05	-0.05	0.104583	-0.0912871	-0.252154	-0.05	-0.0725476	-0.0725476	-0.05	-0.0725476	-0.0684653	-0.05	-0.0912871	0.460977	-0.05	0.460977	-0.230089	-0.0912871	-0.0725476	-0.05	-0.0725476	-0.0526316	-0.0725476	-0.243743	-0.05	-0.05	-0.0684653	0.219089	0.547723	-0.0912871	-0.0963739	-0.101222	-0.0725476	-0.05	-0.160111	-0.05	-0.05	-0.141421	-0.0725476	-0.05	-0.108465	-0.0725476	-0.161515	-0.141421	-0.0725476	-0.0725476	-0.05	-0.10171
STR	-0.05	-0.05	-0.05	0.104583	-0.0912871	-0.252154	-0.05	-0.0725476	-0.0725476	-0.05	-0.0725476	0.890049	-0.05	0.547723	-0.108465	-0.05	-0.108465	-0.230089	0.547723	-0.0725476	-0.05	-0.0725476	-0.0526316	-0.0725476	0.221585	-0.05	-0.05	-0.0684653	-0.164317	-0.0912871	-0.0912871	0.546119	-0.101222	-0.0725476	-0.05	0.145556	-0.05	-0.05	0.353553	-0.0725476	-0.05	-0.108465	-0.0725476	-0.161515	-0.141421	-0.0725476	-0.0725476	-0.05	-0.10171
WOIL	-0.05	-0.05	-0.05	0.41833	-0.0912871	-0.0219265	-0.05	-0.0725476	0.689202	-0.05	-0.0725476	-0.0684653	-0.05	-0.0912871	-0.108465	-0.05	-0.108465	0.0383482	-0.0912871	-0.0725476	-0.05	-0.0725476	-0.0526316	-0.0725476	-0.0110792	-0.05	-0.05	-0.0684653	0.219089	-0.0912871	-0.0912871	-0.0963739	-0.101222	-0.0725476	-0.05	0.145556	-0.05	-0.05	-0.141421	-0.0725476	-0.05	-0.108465	-0.0725476	0.121136	-0.141421	-0.0725476	-0.0725476	-0.05	-0.10171
	1	-0.05	-0.05	0.41833	-0.0912871	-0.252154	-0.05	-0.0725476	-0.0725476	-0.05	-0.0725476	-0.0684653	-0.05	-0.0912871	-0.108465	-0.05	-0.108465	-0.230089	-0.0912871	-0.0725476	1	-0.0725476	-0.0526316	-0.0725476	0.454249	-0.05	-0.05	-0.0684653	-0.164317	-0.0912871	-0.0912871	-0.0963739	-0.101222	-0.0725476	-0.05	-0.160111	-0.05	-0.05	0.353553	-0.0725476	-0.05	0.460977	0.689202	-0.161515	0.353553	-0.0725476	-0.0725476	-0.05	-0.10171
		1	-0.05	0.104583	-0.0912871	0.208301	-0.05	-0.0725476	-0.0725476	-0.05	-0.0725476	-0.0684653	-0.05	-0.0912871	-0.108465	-0.05	-0.108465	0.0383482	-0.0912871	-0.0725476	-0.05	-0.0725476	-0.0526316	-0.0725476	-0.166189	-0.05	-0.05	-0.0684653	-0.164317	-0.0912871	0.547723	0.546119	0.323911	0.689202	-0.05	0.451222	-0.05	-0.05	-0.141421	-0.0725476	-0.05	0.460977	0.689202	-0.161515	0.353553	-0.0725476	-0.0725476	-0.05	0.254274
			1	0.104583	-0.0912871	-0.252154	-0.05	-0.0725476	-0.0725476	-0.05	-0.0725476	-0.0684653	-0.05	-0.0912871	-0.108465	-0.05	-0.108465	-0.230089	-0.0912871	-0.0725476	-0.05	-0.0725476	-0.0526316	-0.0725476	0.0664754	-0.05	-0.05	-0.0684653	0.602495	0.547723	-0.0912871	-0.0963739	-0.101222	-0.0725476	-0.05	-0.160111	-0.05	-0.05	-0.141421	-0.0725476	-0.05	-0.108465	-0.0725476	-0.161515	-0.141421	-0.0725476	-0.0725476	1	-0.10171
				1	0.190941	-0.229312	-0.209165	0.379361	0.151744	0.104583	-0.0758721	0	-0.209165	-0.190941	-0.283589	0.104583	0.226871	-0.160422	-2.64983e-17	-0.303488	0.41833	-0.303488	-0.224872	-0.303488	0.440304	0.104583	-0.209165	-0.286411	-3.81576e-17	-1.05993e-17	-0.190941	0.372549	-0.0423442	-0.0758721	-0.209165	0.152226	0.104583	-0.209165	0.147902	0.379361	-0.209165	0.226871	0.379361	-0.168916	0.147902	-0.0758721	-0.0758721	0.104583	-0.212741
					1	0.380304	-0.0912871	0.331133	-0.132453	0.547723	-0.132453	-0.125	-0.0912871	0.222222	0.148522	-0.0912871	0.148522	0.396746	-0.166667	0.331133	-0.0912871	-0.132453	-0.0963739	-0.132453	0.0269704	-0.0912871	0.547723	-0.125	-0.0666667	0.222222	0.222222	0.215686	-0.184805	-0.132453	0.547723	0.45177	-0.0912871	-0.0912871	-0.258199	0.794719	-0.0912871	0.148522	-0.132453	0.393179	0.344265	-0.132453	-0.132453	-0.0912871	-0.185695
						1	0.208301	0.135211	-0.0318142	0.208301	0.135211	-0.135108	0.208301	0.240192	0.202152	-0.0219265	0.0772934	0.36997	-0.040032	0.302235	-0.252154	0.46926	-0.256495	0.46926	-0.327953	-0.252154	0.208301	-0.030024	-0.156125	-0.180144	0.240192	0.0985134	-0.0443888	0.302235	0.208301	0.465962	-0.0219265	0.208301	-0.387609	0.302235	0.208301	0.202152	-0.0318142	0.424973	0.372104	0.135211	-0.198839	-0.252154	0.423724
							1	-0.0725476	-0.0725476	-0.05	-0.0725476	-0.0684653	1	-0.0912871	0.460977	-0.05	-0.108465	0.306786	-0.0912871	-0.0725476	-0.05	-0.0725476	-0.0526316	-0.0725476	-0.243743	-0.05	-0.05	-0.0684653	0.219089	-0.0912871	-0.0912871	-0.0963739	-0.101222	0.689202	-0.05	-0.160111	-0.05	-0.05	-0.141421	-0.0725476	1	-0.108465	-0.0725476	-0.161515	-0.141421	0.689202	-0.0725476	-0.05	-0.10171
								1	-0.105263	-0.0725476	-0.105263	-0.0993399	-0.0725476	-0.132453	-0.157378	0.689202	0.255739	-0.139104	-0.132453	-0.105263	-0.0725476	-0.105263	-0.0764719	-0.105263	0.546565	-0.0725476	-0.0725476	-0.0993399	0.039736	-0.132453	-0.132453	0.326732	-0.146868	-0.105263	-0.0725476	-0.0105597	0.689202	-0.0725476	0.153897	0.447368	-0.0725476	-0.157378	-0.105263	-0.23435	0.153897	-0.105263	0.447368	-0.0725476	-0.147576
									1	-0.0725476	-0.105263	-0.0993399	-0.0725476	-0.132453	-0.157378	-0.0725476	-0.157378	-0.139104	-0.132453	-0.105263	-0.0725476	-0.105263	-0.0764719	-0.105263	-0.184868	-0.0725476	-0.0725476	-0.0993399	0.039736	-0.132453	0.331133	-0.0963739	0.161555	-0.105263	-0.0725476	-0.0105597	-0.0725476	-0.0725476	-0.205196	-0.105263	-0.0725476	-0.157378	-0.105263	-0.0292937	-0.205196	-0.105263	-0.105263	-0.0725476	-0.147576
										1	-0.0725476	-0.0684653	-0.05	-0.0912871	-0.108465	-0.05	-0.108465	0.575224	-0.0912871	-0.0725476	-0.05	-0.0725476	-0.0526316	-0.0725476	-0.0886339	-0.05	-0.05	-0.0684653	-0.164317	-0.0912871	-0.0912871	-0.0963739	-0.101222	-0.0725476	-0.05	0.451222	-0.05	-0.05	-0.141421	0.689202	-0.05	0.460977	-0.0725476	0.403786	-0.141421	-0.0725476	-0.0725476	-0.05	-0.10171
											1	-0.0993399	-0.0725476	-0.132453	0.255739	-0.0725476	-0.157378	0.0556415	-0.132453	-0.105263	-0.0725476	0.447368	-0.0764719	-0.105263	-0.128604	-0.0725476	-0.0725476	-0.0993399	0.039736	-0.132453	-0.132453	-0.140028	0.469979	-0.105263	-0.0725476	-0.0105597	-0.0725476	-0.0725476	-0.205196	-0.105263	-0.0725476	-0.157378	-0.105263	0.380819	-0.205196	0.447368	-0.105263	-0.0725476	0.368939
												1	-0.0684653	0.458333	-0.148522	-0.0684653	-0.148522	-0.315063	0.458333	0.24835	-0.0684653	-0.0993399	-0.0721479	0.24835	0.23262	-0.0684653	-0.0684653	-0.09375	-0.225	-0.125	-0.125	0.455047	-0.138604	-0.0993399	-0.0684653	0.338827	-0.0684653	-0.0684653	0.484123	-0.0993399	-0.0684653	-0.148522	-0.0993399	-0.0921512	0.0322749	-0.0993399	-0.0993399	-0.0684653	-0.139272
													1	-0.0912871	0.460977	-0.05	-0.108465	0.306786	-0.0912871	-0.0725476	-0.05	-0.0725476	-0.0526316	-0.0725476	-0.243743	-0.05	-0.05	-0.0684653	0.219089	-0.0912871	-0.0912871	-0.0963739	-0.101222	0.689202	-0.05	-0.160111	-0.05	-0.05	-0.141421	-0.0725476	1	-0.108465	-0.0725476	-0.161515	-0.141421	0.689202	-0.0725476	-0.05	-0.10171
														1	0.148522	-0.0912871	0.148522	0.070014	0.611111	0.331133	-0.0912871	0.331133	-0.0764719	0.331133	0.0269704	-0.0912871	0.547723	0.166667	-0.0666667	0.222222	0.222222	0.215686	-0.184805	-0.132453	0.547723	0.0797241	-0.0912871	-0.0912871	0.0430331	-0.132453	-0.0912871	-0.19803	-0.132453	0.0491473	0.0430331	-0.132453	-0.132453	-0.0912871	0.247594
															1	-0.108465	0.0735294	0.22877	-0.19803	0.255739	-0.108465	0.255739	-0.114708	-0.157378	-0.360514	-0.108465	0.460977	-0.148522	0.475271	0.495074	0.148522	-0.210042	-0.219581	0.255739	0.460977	-0.0157877	-0.108465	-0.108465	-0.306786	-0.157378	0.460977	-0.235294	-0.157378	0.262781	-0.0383482	0.255739	-0.157378	-0.108465	0.165479
																1	-0.108465	0.0383482	-0.0912871	-0.0725476	-0.05	-0.0725476	-0.0526316	-0.0725476	0.531804	-0.05	-0.05	-0.0684653	0.219089	-0.0912871	-0.0912871	-0.0963739	-0.101222	-0.0725476	-0.05	-0.160111	1	-0.05	0.353553	-0.0725476	-0.05	-0.108465	-0.0725476	-0.161515	-0.141421	-0.0725476	0.689202	-0.05	-0.10171
																	1	-0.0623918	0.495074	-0.157378	-0.108465	0.255739	-0.0963739	0.255739	-0.108154	0.460977	-0.108465	0.111392	-0.148522	0.148522	-0.19803	0.140028	-0.219581	-0.157378	-0.108465	-0.181559	-0.108465	-0.108465	-0.0383482	0.255739	-0.108465	-0.235294	-0.157378	-0.197086	-0.0383482	-0.157378	-0.157378	-0.108465	0.358538
																		1	0.070014	0.0556415	-0.230089	0.0556415	-0.228626	-0.139104	-0.269084	0.306786	0.306786	-0.192539	-0.070014	-0.093352	0.070014	-0.286576	-0.0310535	0.250387	0.306786	0.200945	0.0383482	0.0383482	-0.271163	0.250387	0.306786	0.22877	-0.139104	0.557442	-0.14462	0.250387	0.0556415	-0.230089	0.169017
																			1	-0.132453	-0.0912871	0.331133	-0.0764719	0.331133	0.0269704	0.547723	-0.0912871	0.166667	-0.3	-0.166667	-0.166667	0.215686	-0.184805	-0.132453	-0.0912871	-0.106299	-0.0912871	-0.0912871	0.344265	-0.132453	-0.0912871	-0.19803	-0.132453	-0.122868	-0.258199	-0.132453	-0.132453	-0.0912871	0.464238
																				1	-0.0725476	-0.105263	-0.0764719	0.447368	-0.0160755	-0.0725476	0.689202	-0.0993399	0.039736	0.331133	0.331133	-0.140028	-0.146868	-0.105263	0.689202	0.432948	-0.0725476	-0.0725476	0.153897	-0.105263	-0.0725476	-0.157378	-0.105263	0.380819	0.512989	-0.105263	-0.105263	-0.0725476	-0.147576
																					1	-0.0725476	-0.0526316	-0.0725476	0.454249	-0.05	-0.05	-0.0684653	-0.164317	-0.0912871	-0.0912871	-0.0963739	-0.101222	-0.0725476	-0.05	-0.160111	-0.05	-0.05	0.353553	-0.0725476	-0.05	0.460977	0.689202	-0.161515	0.353553	-0.0725476	-0.0725476	-0.05	-0.10171
																						1	-0.0526316	0.447368	-0.128604	-0.0725476	-0.0725476	0.24835	0.039736	-0.132453	-0.132453	-0.140028	-0.146868	-0.105263	-0.0725476	-0.0105597	-0.0725476	-0.0725476	-0.205196	-0.105263	-0.0725476	-0.157378	-0.105263	0.175762	-0.205196	-0.105263	-0.105263	-0.0725476	0.885454
																							1	-0.0526316	-0.0935504	-0.0526316	-0.0526316	1	0.214047	-0.0963739	-0.0963739	-0.102062	-0.106966	-0.0764719	-0.0526316	-0.170527	-0.0526316	-0.0526316	0.350438	-0.0764719	-0.0526316	-0.114708	-0.0764719	-0.172062	-0.150188	-0.0764719	-0.0764719	-0.0526316	-0.0899843
																								1	-0.0160755	-0.0725476	-0.0725476	0.24835	-0.238416	-0.132453	-0.132453	-0.140028	-0.146868	-0.105263	-0.0725476	0.211194	-0.0725476	-0.0725476	0.153897	-0.105263	-0.0725476	-0.157378	-0.105263	-0.0292937	0.153897	-0.105263	-0.105263	-0.0725476	0.368939
																									1	-0.0886339	-0.0886339	-0.121367	-0.0364101	-0.161823	-0.303418	0.151497	-0.242236	-0.297396	-0.0886339	-0.0354782	0.531804	-0.321298	0.517058	0.0964527	-0.243743	-0.0660942	0.208981	-0.348944	0.0783421	-0.241132	0.602829	0.0664754	-0.206592
																										1	-0.05	-0.0684653	-0.164317	-0.0912871	-0.0912871	-0.0963739	-0.101222	-0.0725476	-0.05	-0.160111	-0.05	-0.05	0.353553	-0.0725476	-0.05	-0.108465	-0.0725476	0.121136	-0.141421	-0.0725476	-0.0725476	-0.05	0.254274
																											1	-0.0684653	0.219089	0.547723	0.547723	-0.0963739	-0.101222	-0.0725476	1	0.145556	-0.05	-0.05	-0.141421	-0.0725476	-0.05	-0.108465	-0.0725476	0.403786	0.353553	-0.0725476	-0.0725476	-0.05	-0.10171
																												1	0.125	-0.125	-0.125	-0.13211	-0.138604	-0.0993399	-0.0684653	-0.219241	-0.0684653	-0.0684653	0.258199	-0.0993399	-0.0684653	-0.148522	-0.0993399	-0.221163	-0.193649	-0.0993399	-0.0993399	-0.0684653	0.185695
																													1	0.633333	-0.0666667	-0.32068	-0.33265	0.039736	0.219089	-0.191338	0.219089	-0.164317	-0.10328	-0.238416	0.219089	-0.356453	-0.238416	-0.0147442	-0.284019	0.039736	0.039736	0.602495	-0.0742781
																														1	0.222222	-0.176471	-0.184805	-0.132453	0.547723	-0.106299	-0.0912871	-0.0912871	-0.258199	-0.132453	-0.0912871	-0.19803	-0.132453	0.0491473	0.0430331	-0.132453	-0.132453	0.547723	-0.185695
																															1	0.326732	0.33265	0.331133	0.547723	0.265747	-0.0912871	-0.0912871	-0.258199	-0.132453	-0.0912871	0.148522	0.331133	0.0491473	0.344265	-0.132453	-0.132453	-0.0912871	0.0309492
																																1	0.109847	0.326732	-0.0963739	0.444724	-0.0963739	-0.0963739	0.0305566	0.326732	-0.0963739	0.140028	0.326732	-0.315063	0.336123	-0.140028	-0.140028	-0.0963739	0.0218687
																																	1	0.161555	-0.101222	-0.0766139	-0.101222	-0.101222	-0.286299	-0.146868	-0.101222	0.0109791	0.161555	-0.098093	-0.0858898	0.469979	-0.146868	-0.101222	-0.0617715
																																		1	-0.0725476	0.211194	-0.0725476	-0.0725476	-0.205196	-0.105263	0.689202	0.255739	0.447368	-0.23435	0.153897	0.447368	-0.105263	-0.0725476	0.110682
																																			1	0.145556	-0.05	-0.05	-0.141421	-0.0725476	-0.05	-0.108465	-0.0725476	0.403786	0.353553	-0.0725476	-0.0725476	-0.05	-0.10171
																																				1	-0.160111	-0.160111	-0.0205847	0.432948	-0.160111	0.315754	0.211194	0.387904	0.411693	-0.232314	-0.232314	-0.160111	0.0888264
																																					1	-0.05	0.353553	-0.0725476	-0.05	-0.108465	-0.0725476	-0.161515	-0.141421	-0.0725476	0.689202	-0.05	-0.10171
																																						1	-0.141421	-0.0725476	-0.05	0.460977	-0.0725476	0.403786	0.353553	-0.0725476	-0.0725476	-0.05	-0.10171
																																							1	-0.205196	-0.141421	-0.0383482	0.153897	-0.190347	0.0666667	-0.205196	0.153897	-0.141421	-0.119866
																																								1	-0.0725476	0.255739	-0.105263	0.175762	0.153897	-0.105263	-0.105263	-0.0725476	-0.147576
																																									1	-0.108465	-0.0725476	-0.161515	-0.141421	0.689202	-0.0725476	-0.05	-0.10171
																																										1	0.668856	0.262781	0.498527	-0.157378	-0.157378	-0.108465	-0.0275799
																																											1	-0.23435	0.512989	-0.105263	-0.105263	-0.0725476	0.110682
																																												1	0.209381	-0.0292937	-0.23435	-0.161515	0.150586
																																													1	-0.205196	-0.205196	-0.141421	-0.119866
																																														1	-0.105263	-0.0725476	-0.147576
																																															1	-0.0725476	-0.147576
																																																1	-0.10171
																																																	1

		Combo1	BR3	EPX	Combo2	PA	Combo3	PC	PEG	Combo4	PI	PLT	Combo5	PPS	Combo6	Grand Total
Del Rio		7	7	4	9	5	7	50	4	5	3	5	6	3	14	129
Uvalde		10	7	19	13	13	6	37	5	8	8	1	13	9	15	164
Grand Total		17	14	23	22	18	13	87	9	13	11	6	19	12	29	293
			Combo1	BR3	EPX	Combo2	PA	Combo3	PC	PEG	Combo4	PI	PLT	Combo5	PPS	Combo6
		Combo1	1	0.956325	0.852764	0.999964	0.936103	0.909344	0.852581	0.994333	0.996506	0.932216	0.405099	0.963412	0.914273	0.972051
		BR3	0.956325	1	0.662849	0.953821	0.792406	0.991241	0.968102	0.981981	0.928571	0.785714	0.654654	0.842989	0.755929	0.998221
		EPX	0.852764	0.662849	1	0.857146	0.981981	0.558157	0.4541	0.792406	0.893405	0.983981	-0.132068	0.961552	0.991241	0.70631
		Combo2	0.999964	0.953821	0.857146	1	0.939041	0.905796	0.848135	0.993399	0.997176	0.93524	0.39736	0.965642	0.917663	0.970033
		PA	0.936103	0.792406	0.981981	0.939041	1	0.704904	0.614292	0.893405	0.962207	0.999941	0.057639	0.996124	0.998337	0.827364
		Combo3	0.909344	0.991241	0.558157	0.905796	0.704904	1	0.992712	0.948421	0.87142	0.697136	0.748753	0.764561	0.662849	0.981604
		PC	0.852581	0.968102	0.4541	0.848135	0.614292	0.992712	1	0.903307	0.805957	0.60566	0.823174	0.681317	0.567789	0.951442
		PEG	0.994333	0.981981	0.792406	0.993399	0.893405	0.948421	0.903307	1	0.981981	0.888459	0.5	0.929458	0.866025	0.991501
		Combo4	0.996506	0.928571	0.893405	0.997176	0.962207	0.87142	0.805957	0.981981	1	0.959184	0.327327	0.98243	0.944911	0.949048
		PI	0.932216	0.785714	0.983981	0.93524	0.999941	0.697136	0.60566	0.888459	0.959184	1	0.046761	0.995107	0.998906	0.821197
		PLT	0.405099	0.654654	-0.132068	0.39736	0.057639	0.748753	0.823174	0.5	0.327327	0.046761	1	0.145228	0	0.608421
		Combo5	0.963412	0.842989	0.961552	0.965642	0.996124	0.764561	0.681317	0.929458	0.98243	0.995107	0.145228	1	0.989398	0.87356
		PPS	0.914273	0.755929	0.991241	0.917663	0.998337	0.662849	0.567789	0.866025	0.944911	0.998906	0	0.989398	1	0.793614
		Combo6	0.972051	0.998221	0.70631	0.970033	0.827364	0.981604	0.951442	0.991501	0.949048	0.821197	0.608421	0.87356	0.793614	1
			1	0.956325	0.852764	0.999964	0.936103	0.909344	0.852581	0.994333	0.996506	0.932216	0.405099	0.963412	0.914273	0.972051
				1	0.662849	0.953821	0.792406	0.991241	0.968102	0.981981	0.928571	0.785714	0.654654	0.842989	0.755929	0.998221
					1	0.857146	0.981981	0.558157	0.4541	0.792406	0.893405	0.983981	-0.132068	0.961552	0.991241	0.70631
						1	0.939041	0.905796	0.848135	0.993399	0.997176	0.93524	0.39736	0.965642	0.917663	0.970033
							1	0.704904	0.614292	0.893405	0.962207	0.999941	0.057639	0.996124	0.998337	0.827364
								1	0.992712	0.948421	0.87142	0.697136	0.748753	0.764561	0.662849	0.981604
									1	0.903307	0.805957	0.60566	0.823174	0.681317	0.567789	0.951442
										1	0.981981	0.888459	0.5	0.929458	0.866025	0.991501
											1	0.959184	0.327327	0.98243	0.944911	0.949048
												1	0.046761	0.995107	0.998906	0.821197
													1	0.145228	0	0.608421
														1	0.989398	0.87356
															1	0.793614
																1
[truncated: 67 more columns]

## Sheet: Chem Type Heatmap
	ACR	ARA	BMC	BR3	DLTDP	EPX	EVA	FEP	HDPE	HERB	HLAS	HRB	IIR	LDPE	LS770	MEL	NYL	PA	PAC	PAM	PAP	PAR	PB1	PBT	PC	PCL	PDI	PEEK	PEG	PEI	PEPQ	PES	PET	PETG	PHSI	PI	PIB	PIP	PLT	PMP	POM	PP	PPO	PPS	PS	PSO	PTFE2	PUR	PVC
ACR	1	-0.05	-0.05	0.41833	-0.0912871	-0.252154	-0.05	-0.0725476	-0.0725476	-0.05	-0.0725476	-0.0684653	-0.05	-0.0912871	-0.108465	-0.05	-0.108465	-0.230089	-0.0912871	-0.0725476	1	-0.0725476	-0.0526316	-0.0725476	0.454249	-0.05	-0.05	-0.0684653	-0.164317	-0.0912871	-0.0912871	-0.0963739	-0.101222	-0.0725476	-0.05	-0.160111	-0.05	-0.05	0.353553	-0.0725476	-0.05	0.460977	0.689202	-0.161515	0.353553	-0.0725476	-0.0725476	-0.05	-0.10171
ARA	-0.05	1	-0.05	0.104583	-0.0912871	0.208301	-0.05	-0.0725476	-0.0725476	-0.05	-0.0725476	-0.0684653	-0.05	-0.0912871	-0.108465	-0.05	-0.108465	0.0383482	-0.0912871	-0.0725476	-0.05	-0.0725476	-0.0526316	-0.0725476	-0.166189	-0.05	-0.05	-0.0684653	-0.164317	-0.0912871	0.547723	0.546119	0.323911	0.689202	-0.05	0.451222	-0.05	-0.05	-0.141421	-0.0725476	-0.05	0.460977	0.689202	-0.161515	0.353553	-0.0725476	-0.0725476	-0.05	0.254274
BMC	-0.05	-0.05	1	0.104583	-0.0912871	-0.252154	-0.05	-0.0725476	-0.0725476	-0.05	-0.0725476	-0.0684653	-0.05	-0.0912871	-0.108465	-0.05	-0.108465	-0.230089	-0.0912871	-0.0725476	-0.05	-0.0725476	-0.0526316	-0.0725476	0.0664754	-0.05	-0.05	-0.0684653	0.602495	0.547723	-0.0912871	-0.0963739	-0.101222	-0.0725476	-0.05	-0.160111	-0.05	-0.05	-0.141421	-0.0725476	-0.05	-0.108465	-0.0725476	-0.161515	-0.141421	-0.0725476	-0.0725476	1	-0.10171
BR3	0.41833	0.104583	0.104583	1	0.190941	-0.229312	-0.209165	0.379361	0.151744	0.104583	-0.0758721	0	-0.209165	-0.190941	-0.283589	0.104583	0.226871	-0.160422	-2.64983e-17	-0.303488	0.41833	-0.303488	-0.224872	-0.303488	0.440304	0.104583	-0.209165	-0.286411	-3.81576e-17	-1.05993e-17	-0.190941	0.372549	-0.0423442	-0.0758721	-0.209165	0.152226	0.104583	-0.209165	0.147902	0.379361	-0.209165	0.226871	0.379361	-0.168916	0.147902	-0.0758721	-0.0758721	0.104583	-0.212741
DLTDP	-0.0912871	-0.0912871	-0.0912871	0.190941	1	0.380304	-0.0912871	0.331133	-0.132453	0.547723	-0.132453	-0.125	-0.0912871	0.222222	0.148522	-0.0912871	0.148522	0.396746	-0.166667	0.331133	-0.0912871	-0.132453	-0.0963739	-0.132453	0.0269704	-0.0912871	0.547723	-0.125	-0.0666667	0.222222	0.222222	0.215686	-0.184805	-0.132453	0.547723	0.45177	-0.0912871	-0.0912871	-0.258199	0.794719	-0.0912871	0.148522	-0.132453	0.393179	0.344265	-0.132453	-0.132453	-0.0912871	-0.185695
EPX	-0.252154	0.208301	-0.252154	-0.229312	0.380304	1	0.208301	0.135211	-0.0318142	0.208301	0.135211	-0.135108	0.208301	0.240192	0.202152	-0.0219265	0.0772934	0.36997	-0.040032	0.302235	-0.252154	0.46926	-0.256495	0.46926	-0.327953	-0.252154	0.208301	-0.030024	-0.156125	-0.180144	0.240192	0.0985134	-0.0443888	0.302235	0.208301	0.465962	-0.0219265	0.208301	-0.387609	0.302235	0.208301	0.202152	-0.0318142	0.424973	0.372104	0.135211	-0.198839	-0.252154	0.423724
EVA	-0.05	-0.05	-0.05	-0.209165	-0.0912871	0.208301	1	-0.0725476	-0.0725476	-0.05	-0.0725476	-0.0684653	1	-0.0912871	0.460977	-0.05	-0.108465	0.306786	-0.0912871	-0.0725476	-0.05	-0.0725476	-0.0526316	-0.0725476	-0.243743	-0.05	-0.05	-0.0684653	0.219089	-0.0912871	-0.0912871	-0.0963739	-0.101222	0.689202	-0.05	-0.160111	-0.05	-0.05	-0.141421	-0.0725476	1	-0.108465	-0.0725476	-0.161515	-0.141421	0.689202	-0.0725476	-0.05	-0.10171
FEP	-0.0725476	-0.0725476	-0.0725476	0.379361	0.331133	0.135211	-0.0725476	1	-0.105263	-0.0725476	-0.105263	-0.0993399	-0.0725476	-0.132453	-0.157378	0.689202	0.255739	-0.139104	-0.132453	-0.105263	-0.0725476	-0.105263	-0.0764719	-0.105263	0.546565	-0.0725476	-0.0725476	-0.0993399	0.039736	-0.132453	-0.132453	0.326732	-0.146868	-0.105263	-0.0725476	-0.0105597	0.689202	-0.0725476	0.153897	0.447368	-0.0725476	-0.157378	-0.105263	-0.23435	0.153897	-0.105263	0.447368	-0.0725476	-0.147576
HDPE	-0.0725476	-0.0725476	-0.0725476	0.151744	-0.132453	-0.0318142	-0.0725476	-0.105263	1	-0.0725476	-0.105263	-0.0993399	-0.0725476	-0.132453	-0.157378	-0.0725476	-0.157378	-0.139104	-0.132453	-0.105263	-0.0725476	-0.105263	-0.0764719	-0.105263	-0.184868	-0.0725476	-0.0725476	-0.0993399	0.039736	-0.132453	0.331133	-0.0963739	0.161555	-0.105263	-0.0725476	-0.0105597	-0.0725476	-0.0725476	-0.205196	-0.105263	-0.0725476	-0.157378	-0.105263	-0.0292937	-0.205196	-0.105263	-0.105263	-0.0725476	-0.147576
HERB	-0.05	-0.05	-0.05	0.104583	0.547723	0.208301	-0.05	-0.0725476	-0.0725476	1	-0.0725476	-0.0684653	-0.05	-0.0912871	-0.108465	-0.05	-0.108465	0.575224	-0.0912871	-0.0725476	-0.05	-0.0725476	-0.0526316	-0.0725476	-0.0886339	-0.05	-0.05	-0.0684653	-0.164317	-0.0912871	-0.0912871	-0.0963739	-0.101222	-0.0725476	-0.05	0.451222	-0.05	-0.05	-0.141421	0.689202	-0.05	0.460977	-0.0725476	0.403786	-0.141421	-0.0725476	-0.0725476	-0.05	-0.10171
HLAS	-0.0725476	-0.0725476	-0.0725476	-0.0758721	-0.132453	0.135211	-0.0725476	-0.105263	-0.105263	-0.0725476	1	-0.0993399	-0.0725476	-0.132453	0.255739	-0.0725476	-0.157378	0.0556415	-0.132453	-0.105263	-0.0725476	0.447368	-0.0764719	-0.105263	-0.128604	-0.0725476	-0.0725476	-0.0993399	0.039736	-0.132453	-0.132453	-0.140028	0.469979	-0.105263	-0.0725476	-0.0105597	-0.0725476	-0.0725476	-0.205196	-0.105263	-0.0725476	-0.157378	-0.105263	0.380819	-0.205196	0.447368	-0.105263	-0.0725476	0.368939
HRB	-0.0684653	-0.0684653	-0.0684653	0	-0.125	-0.135108	-0.0684653	-0.0993399	-0.0993399	-0.0684653	-0.0993399	1	-0.0684653	0.458333	-0.148522	-0.0684653	-0.148522	-0.315063	0.458333	0.24835	-0.0684653	-0.0993399	-0.0721479	0.24835	0.23262	-0.0684653	-0.0684653	-0.09375	-0.225	-0.125	-0.125	0.455047	-0.138604	-0.0993399	-0.0684653	0.338827	-0.0684653	-0.0684653	0.484123	-0.0993399	-0.0684653	-0.148522	-0.0993399	-0.0921512	0.0322749	-0.0993399	-0.0993399	-0.0684653	-0.139272
IIR	-0.05	-0.05	-0.05	-0.209165	-0.0912871	0.208301	1	-0.0725476	-0.0725476	-0.05	-0.0725476	-0.0684653	1	-0.0912871	0.460977	-0.05	-0.108465	0.306786	-0.0912871	-0.0725476	-0.05	-0.0725476	-0.0526316	-0.0725476	-0.243743	-0.05	-0.05	-0.0684653	0.219089	-0.0912871	-0.0912871	-0.0963739	-0.101222	0.689202	-0.05	-0.160111	-0.05	-0.05	-0.141421	-0.0725476	1	-0.108465	-0.0725476	-0.161515	-0.141421	0.689202	-0.0725476	-0.05	-0.10171
LDPE	-0.0912871	-0.0912871	-0.0912871	-0.190941	0.222222	0.240192	-0.0912871	-0.132453	-0.132453	-0.0912871	-0.132453	0.458333	-0.0912871	1	0.148522	-0.0912871	0.148522	0.070014	0.611111	0.331133	-0.0912871	0.331133	-0.0764719	0.331133	0.0269704	-0.0912871	0.547723	0.166667	-0.0666667	0.222222	0.222222	0.215686	-0.184805	-0.132453	0.547723	0.0797241	-0.0912871	-0.0912871	0.0430331	-0.132453	-0.0912871	-0.19803	-0.132453	0.0491473	0.0430331	-0.132453	-0.132453	-0.0912871	0.247594
LS770	-0.108465	-0.108465	-0.108465	-0.283589	0.148522	0.202152	0.460977	-0.157378	-0.157378	-0.108465	0.255739	-0.148522	0.460977	0.148522	1	-0.108465	0.0735294	0.22877	-0.19803	0.255739	-0.108465	0.255739	-0.114708	-0.157378	-0.360514	-0.108465	0.460977	-0.148522	0.475271	0.495074	0.148522	-0.210042	-0.219581	0.255739	0.460977	-0.0157877	-0.108465	-0.108465	-0.306786	-0.157378	0.460977	-0.235294	-0.157378	0.262781	-0.0383482	0.255739	-0.157378	-0.108465	0.165479
MEL	-0.05	-0.05	-0.05	0.104583	-0.0912871	-0.0219265	-0.05	0.689202	-0.0725476	-0.05	-0.0725476	-0.0684653	-0.05	-0.0912871	-0.108465	1	-0.108465	0.0383482	-0.0912871	-0.0725476	-0.05	-0.0725476	-0.0526316	-0.0725476	0.531804	-0.05	-0.05	-0.0684653	0.219089	-0.0912871	-0.0912871	-0.0963739	-0.101222	-0.0725476	-0.05	-0.160111	1	-0.05	0.353553	-0.0725476	-0.05	-0.108465	-0.0725476	-0.161515	-0.141421	-0.0725476	0.689202	-0.05	-0.10171
NYL	-0.108465	-0.108465	-0.108465	0.226871	0.148522	0.0772934	-0.108465	0.255739	-0.157378	-0.108465	-0.157378	-0.148522	-0.108465	0.148522	0.0735294	-0.108465	1	-0.0623918	0.495074	-0.157378	-0.108465	0.255739	-0.0963739	0.255739	-0.108154	0.460977	-0.108465	0.111392	-0.148522	0.148522	-0.19803	0.140028	-0.219581	-0.157378	-0.108465	-0.181559	-0.108465	-0.108465	-0.0383482	0.255739	-0.108465	-0.235294	-0.157378	-0.197086	-0.0383482	-0.157378	-0.157378	-0.108465	0.358538
PA	-0.230089	0.0383482	-0.230089	-0.160422	0.396746	0.36997	0.306786	-0.139104	-0.139104	0.575224	0.0556415	-0.315063	0.306786	0.070014	0.22877	0.0383482	-0.0623918	1	0.070014	0.0556415	-0.230089	0.0556415	-0.228626	-0.139104	-0.269084	0.306786	0.306786	-0.192539	-0.070014	-0.093352	0.070014	-0.286576	-0.0310535	0.250387	0.306786	0.200945	0.0383482	0.0383482	-0.271163	0.250387	0.306786	0.22877	-0.139104	0.557442	-0.14462	0.250387	0.0556415	-0.230089	0.169017
PAC	-0.0912871	-0.0912871	-0.0912871	-2.64983e-17	-0.166667	-0.040032	-0.0912871	-0.132453	-0.132453	-0.0912871	-0.132453	0.458333	-0.0912871	0.611111	-0.19803	-0.0912871	0.495074	0.070014	1	-0.132453	-0.0912871	0.331133	-0.0764719	0.331133	0.0269704	0.547723	-0.0912871	0.166667	-0.3	-0.166667	-0.166667	0.215686	-0.184805	-0.132453	-0.0912871	-0.106299	-0.0912871	-0.0912871	0.344265	-0.132453	-0.0912871	-0.19803	-0.132453	-0.122868	-0.258199	-0.132453	-0.132453	-0.0912871	0.464238
PAM	-0.0725476	-0.0725476	-0.0725476	-0.303488	0.331133	0.302235	-0.0725476	-0.105263	-0.105263	-0.0725476	-0.105263	0.24835	-0.0725476	0.331133	0.255739	-0.0725476	-0.157378	0.0556415	-0.132453	1	-0.0725476	-0.105263	-0.0764719	0.447368	-0.0160755	-0.0725476	0.689202	-0.0993399	0.039736	0.331133	0.331133	-0.140028	-0.146868	-0.105263	0.689202	0.432948	-0.0725476	-0.0725476	0.153897	-0.105263	-0.0725476	-0.157378	-0.105263	0.380819	0.512989	-0.105263	-0.105263	-0.0725476	-0.147576
PAP	1	-0.05	-0.05	0.41833	-0.0912871	-0.252154	-0.05	-0.0725476	-0.0725476	-0.05	-0.0725476	-0.0684653	-0.05	-0.0912871	-0.108465	-0.05	-0.108465	-0.230089	-0.0912871	-0.0725476	1	-0.0725476	-0.0526316	-0.0725476	0.454249	-0.05	-0.05	-0.0684653	-0.164317	-0.0912871	-0.0912871	-0.0963739	-0.101222	-0.0725476	-0.05	-0.160111	-0.05	-0.05	0.353553	-0.0725476	-0.05	0.460977	0.689202	-0.161515	0.353553	-0.0725476	-0.0725476	-0.05	-0.10171
PAR	-0.0725476	-0.0725476	-0.0725476	-0.303488	-0.132453	0.46926	-0.0725476	-0.105263	-0.105263	-0.0725476	0.447368	-0.0993399	-0.0725476	0.331133	0.255739	-0.0725476	0.255739	0.0556415	0.331133	-0.105263	-0.0725476	1	-0.0526316	0.447368	-0.128604	-0.0725476	-0.0725476	0.24835	0.039736	-0.132453	-0.132453	-0.140028	-0.146868	-0.105263	-0.0725476	-0.0105597	-0.0725476	-0.0725476	-0.205196	-0.105263	-0.0725476	-0.157378	-0.105263	0.175762	-0.205196	-0.105263	-0.105263	-0.0725476	0.885454
PB1	-0.0526316	-0.0526316	-0.0526316	-0.224872	-0.0963739	-0.256495	-0.0526316	-0.0764719	-0.0764719	-0.0526316	-0.0764719	-0.0721479	-0.0526316	-0.0764719	-0.114708	-0.0526316	-0.0963739	-0.228626	-0.0764719	-0.0764719	-0.0526316	-0.0526316	1	-0.0526316	-0.0935504	-0.0526316	-0.0526316	1	0.214047	-0.0963739	-0.0963739	-0.102062	-0.106966	-0.0764719	-0.0526316	-0.170527	-0.0526316	-0.0526316	0.350438	-0.0764719	-0.0526316	-0.114708	-0.0764719	-0.172062	-0.150188	-0.0764719	-0.0764719	-0.0526316	-0.0899843
PBT	-0.0725476	-0.0725476	-0.0725476	-0.303488	-0.132453	0.46926	-0.0725476	-0.105263	-0.105263	-0.0725476	-0.105263	0.24835	-0.0725476	0.331133	-0.157378	-0.0725476	0.255739	-0.139104	0.331133	0.447368	-0.0725476	0.447368	-0.0526316	1	-0.0160755	-0.0725476	-0.0725476	0.24835	-0.238416	-0.132453	-0.132453	-0.140028	-0.146868	-0.105263	-0.0725476	0.211194	-0.0725476	-0.0725476	0.153897	-0.105263	-0.0725476	-0.157378	-0.105263	-0.0292937	0.153897	-0.105263	-0.105263	-0.0725476	0.368939
PC	0.454249	-0.166189	0.0664754	0.440304	0.0269704	-0.327953	-0.243743	0.546565	-0.184868	-0.0886339	-0.128604	0.23262	-0.243743	0.0269704	-0.360514	0.531804	-0.108154	-0.269084	0.0269704	-0.0160755	0.454249	-0.128604	-0.0935504	-0.0160755	1	-0.0886339	-0.0886339	-0.121367	-0.0364101	-0.161823	-0.303418	0.151497	-0.242236	-0.297396	-0.0886339	-0.0354782	0.531804	-0.321298	0.517058	0.0964527	-0.243743	-0.0660942	0.208981	-0.348944	0.0783421	-0.241132	0.602829	0.0664754	-0.206592
PCL	-0.05	-0.05	-0.05	0.104583	-0.0912871	-0.252154	-0.05	-0.0725476	-0.0725476	-0.05	-0.0725476	-0.0684653	-0.05	-0.0912871	-0.108465	-0.05	0.460977	0.306786	0.547723	-0.0725476	-0.05	-0.0725476	-0.0526316	-0.0725476	-0.0886339	1	-0.05	-0.0684653	-0.164317	-0.0912871	-0.0912871	-0.0963739	-0.101222	-0.0725476	-0.05	-0.160111	-0.05	-0.05	0.353553	-0.0725476	-0.05	-0.108465	-0.0725476	0.121136	-0.141421	-0.0725476	-0.0725476	-0.05	0.254274
PDI	-0.05	-0.05	-0.05	-0.209165	0.547723	0.208301	-0.05	-0.0725476	-0.0725476	-0.05	-0.0725476	-0.0684653	-0.05	0.547723	0.460977	-0.05	-0.108465	0.306786	-0.0912871	0.689202	-0.05	-0.0725476	-0.0526316	-0.0725476	-0.0886339	-0.05	1	-0.0684653	0.219089	0.547723	0.547723	-0.0963739	-0.101222	-0.0725476	1	0.145556	-0.05	-0.05	-0.141421	-0.0725476	-0.05	-0.108465	-0.0725476	0.403786	0.353553	-0.0725476	-0.0725476	-0.05	-0.10171
PEEK	-0.0684653	-0.0684653	-0.0684653	-0.286411	-0.125	-0.030024	-0.0684653	-0.0993399	-0.0993399	-0.0684653	-0.0993399	-0.09375	-0.0684653	0.166667	-0.148522	-0.0684653	0.111392	-0.192539	0.166667	-0.0993399	-0.0684653	0.24835	1	0.24835	-0.121367	-0.0684653	-0.0684653	1	0.125	-0.125	-0.125	-0.13211	-0.138604	-0.0993399	-0.0684653	-0.219241	-0.0684653	-0.0684653	0.258199	-0.0993399	-0.0684653	-0.148522	-0.0993399	-0.221163	-0.193649	-0.0993399	-0.0993399	-0.0684653	0.185695
PEG	-0.164317	-0.164317	0.602495	-3.81576e-17	-0.0666667	-0.156125	0.219089	0.039736	0.039736	-0.164317	0.039736	-0.225	0.219089	-0.0666667	0.475271	0.219089	-0.148522	-0.070014	-0.3	0.039736	-0.164317	0.039736	0.214047	-0.238416	-0.0364101	-0.164317	0.219089	0.125	1	0.633333	-0.0666667	-0.32068	-0.33265	0.039736	0.219089	-0.191338	0.219089	-0.164317	-0.10328	-0.238416	0.219089	-0.356453	-0.238416	-0.0147442	-0.284019	0.039736	0.039736	0.602495	-0.0742781
PEI	-0.0912871	-0.0912871	0.547723	-1.05993e-17	0.222222	-0.180144	-0.0912871	-0.132453	-0.132453	-0.0912871	-0.132453	-0.125	-0.0912871	0.222222	0.495074	-0.0912871	0.148522	-0.093352	-0.166667	0.331133	-0.0912871	-0.132453	-0.0963739	-0.132453	-0.161823	-0.0912871	0.547723	-0.125	0.633333	1	0.222222	-0.176471	-0.184805	-0.132453	0.547723	-0.106299	-0.0912871	-0.0912871	-0.258199	-0.132453	-0.0912871	-0.19803	-0.132453	0.0491473	0.0430331	-0.132453	-0.132453	0.547723	-0.185695
PEPQ	-0.0912871	0.547723	-0.0912871	-0.190941	0.222222	0.240192	-0.0912871	-0.132453	0.331133	-0.0912871	-0.132453	-0.125	-0.0912871	0.222222	0.148522	-0.0912871	-0.19803	0.070014	-0.166667	0.331133	-0.0912871	-0.132453	-0.0963739	-0.132453	-0.303418	-0.0912871	0.547723	-0.125	-0.0666667	0.222222	1	0.326732	0.33265	0.331133	0.547723	0.265747	-0.0912871	-0.0912871	-0.258199	-0.132453	-0.0912871	0.148522	0.331133	0.0491473	0.344265	-0.132453	-0.132453	-0.0912871	0.0309492
PES	-0.0963739	0.546119	-0.0963739	0.372549	0.215686	0.0985134	-0.0963739	0.326732	-0.0963739	-0.0963739	-0.140028	0.455047	-0.0963739	0.215686	-0.210042	-0.0963739	0.140028	-0.286576	0.215686	-0.140028	-0.0963739	-0.140028	-0.102062	-0.140028	0.151497	-0.0963739	-0.0963739	-0.13211	-0.32068	-0.176471	0.326732	1	0.109847	0.326732	-0.0963739	0.444724	-0.0963739	-0.0963739	0.0305566	0.326732	-0.0963739	0.140028	0.326732	-0.315063	0.336123	-0.140028	-0.140028	-0.0963739	0.0218687
PET	-0.101222	0.323911	-0.101222	-0.0423442	-0.184805	-0.0443888	-0.101222	-0.146868	0.161555	-0.101222	0.469979	-0.138604	-0.101222	-0.184805	-0.219581	-0.101222	-0.219581	-0.0310535	-0.184805	-0.146868	-0.101222	-0.146868	-0.106966	-0.146868	-0.242236	-0.101222	-0.101222	-0.138604	-0.33265	-0.184805	0.33265	0.109847	1	0.161555	-0.101222	-0.0766139	-0.101222	-0.101222	-0.286299	-0.146868	-0.101222	0.0109791	0.161555	-0.098093	-0.0858898	0.469979	-0.146868	-0.101222	-0.0617715
PETG	-0.0725476	0.689202	-0.0725476	-0.0758721	-0.132453	0.302235	0.689202	-0.105263	-0.105263	-0.0725476	-0.105263	-0.0993399	0.689202	-0.132453	0.255739	-0.0725476	-0.157378	0.250387	-0.132453	-0.105263	-0.0725476	-0.105263	-0.0764719	-0.105263	-0.297396	-0.0725476	-0.0725476	-0.0993399	0.039736	-0.132453	0.331133	0.326732	0.161555	1	-0.0725476	0.211194	-0.0725476	-0.0725476	-0.205196	-0.105263	0.689202	0.255739	0.447368	-0.23435	0.153897	0.447368	-0.105263	-0.0725476	0.110682
PHSI	-0.05	-0.05	-0.05	-0.209165	0.547723	0.208301	-0.05	-0.0725476	-0.0725476	-0.05	-0.0725476	-0.0684653	-0.05	0.547723	0.460977	-0.05	-0.108465	0.306786	-0.0912871	0.689202	-0.05	-0.0725476	-0.0526316	-0.0725476	-0.0886339	-0.05	1	-0.0684653	0.219089	0.547723	0.547723	-0.0963739	-0.101222	-0.0725476	1	0.145556	-0.05	-0.05	-0.141421	-0.0725476	-0.05	-0.108465	-0.0725476	0.403786	0.353553	-0.0725476	-0.0725476	-0.05	-0.10171
PI	-0.160111	0.451222	-0.160111	0.152226	0.45177	0.465962	-0.160111	-0.0105597	-0.0105597	0.451222	-0.0105597	0.338827	-0.160111	0.0797241	-0.0157877	-0.160111	-0.181559	0.200945	-0.106299	0.432948	-0.160111	-0.0105597	-0.170527	0.211194	-0.0354782	-0.160111	0.145556	-0.219241	-0.191338	-0.106299	0.265747	0.444724	-0.0766139	0.211194	0.145556	1	-0.160111	-0.160111	-0.0205847	0.432948	-0.160111	0.315754	0.211194	0.387904	0.411693	-0.232314	-0.232314	-0.160111	0.0888264
PIB	-0.05	-0.05	-0.05	0.104583	-0.0912871	-0.0219265	-0.05	0.689202	-0.0725476	-0.05	-0.0725476	-0.0684653	-0.05	-0.0912871	-0.108465	1	-0.108465	0.0383482	-0.0912871	-0.0725476	-0.05	-0.0725476	-0.0526316	-0.0725476	0.531804	-0.05	-0.05	-0.0684653	0.219089	-0.0912871	-0.0912871	-0.0963739	-0.101222	-0.0725476	-0.05	-0.160111	1	-0.05	0.353553	-0.0725476	-0.05	-0.108465	-0.0725476	-0.161515	-0.141421	-0.0725476	0.689202	-0.05	-0.10171
PIP	-0.05	-0.05	-0.05	-0.209165	-0.0912871	0.208301	-0.05	-0.0725476	-0.0725476	-0.05	-0.0725476	-0.0684653	-0.05	-0.0912871	-0.108465	-0.05	-0.108465	0.0383482	-0.0912871	-0.0725476	-0.05	-0.0725476	-0.0526316	-0.0725476	-0.321298	-0.05	-0.05	-0.0684653	-0.164317	-0.0912871	-0.0912871	-0.0963739	-0.101222	-0.0725476	-0.05	-0.160111	-0.05	1	-0.141421	-0.0725476	-0.05	0.460977	-0.0725476	0.403786	0.353553	-0.0725476	-0.0725476	-0.05	-0.10171
PLT	0.353553	-0.141421	-0.141421	0.147902	-0.258199	-0.387609	-0.141421	0.153897	-0.205196	-0.141421	-0.205196	0.484123	-0.141421	0.0430331	-0.306786	0.353553	-0.0383482	-0.271163	0.344265	0.153897	0.353553	-0.205196	0.350438	0.153897	0.517058	0.353553	-0.141421	0.258199	-0.10328	-0.258199	-0.258199	0.0305566	-0.286299	-0.205196	-0.141421	-0.0205847	0.353553	-0.141421	1	-0.205196	-0.141421	-0.0383482	0.153897	-0.190347	0.0666667	-0.205196	0.153897	-0.141421	-0.119866
PMP	-0.0725476	-0.0725476	-0.0725476	0.379361	0.794719	0.302235	-0.0725476	0.447368	-0.105263	0.689202	-0.105263	-0.0993399	-0.0725476	-0.132453	-0.157378	-0.0725476	0.255739	0.250387	-0.132453	-0.105263	-0.0725476	-0.105263	-0.0764719	-0.105263	0.0964527	-0.0725476	-0.0725476	-0.0993399	-0.238416	-0.132453	-0.132453	0.326732	-0.146868	-0.105263	-0.0725476	0.432948	-0.0725476	-0.0725476	-0.205196	1	-0.0725476	0.255739	-0.105263	0.175762	0.153897	-0.105263	-0.105263	-0.0725476	-0.147576
POM	-0.05	-0.05	-0.05	-0.209165	-0.0912871	0.208301	1	-0.0725476	-0.0725476	-0.05	-0.0725476	-0.0684653	1	-0.0912871	0.460977	-0.05	-0.108465	0.306786	-0.0912871	-0.0725476	-0.05	-0.0725476	-0.0526316	-0.0725476	-0.243743	-0.05	-0.05	-0.0684653	0.219089	-0.0912871	-0.0912871	-0.0963739	-0.101222	0.689202	-0.05	-0.160111	-0.05	-0.05	-0.141421	-0.0725476	1	-0.108465	-0.0725476	-0.161515	-0.141421	0.689202	-0.0725476	-0.05	-0.10171
PP	0.460977	0.460977	-0.108465	0.226871	0.148522	0.202152	-0.108465	-0.157378	-0.157378	0.460977	-0.157378	-0.148522	-0.108465	-0.19803	-0.235294	-0.108465	-0.235294	0.22877	-0.19803	-0.157378	0.460977	-0.157378	-0.114708	-0.157378	-0.0660942	-0.108465	-0.108465	-0.148522	-0.356453	-0.19803	0.148522	0.140028	0.0109791	0.255739	-0.108465	0.315754	-0.108465	0.460977	-0.0383482	0.255739	-0.108465	1	0.668856	0.262781	0.498527	-0.157378	-0.157378	-0.108465	-0.0275799
PPO	0.689202	0.689202	-0.0725476	0.379361	-0.132453	-0.0318142	-0.0725476	-0.105263	-0.105263	-0.0725476	-0.105263	-0.0993399	-0.0725476	-0.132453	-0.157378	-0.0725476	-0.157378	-0.139104	-0.132453	-0.105263	0.689202	-0.105263	-0.0764719	-0.105263	0.208981	-0.0725476	-0.0725476	-0.0993399	-0.238416	-0.132453	0.331133	0.326732	0.161555	0.447368	-0.0725476	0.211194	-0.0725476	-0.0725476	0.153897	-0.105263	-0.0725476	0.668856	1	-0.23435	0.512989	-0.105263	-0.105263	-0.0725476	0.110682
PPS	-0.161515	-0.161515	-0.161515	-0.168916	0.393179	0.424973	-0.161515	-0.23435	-0.0292937	0.403786	0.380819	-0.0921512	-0.161515	0.0491473	0.262781	-0.161515	-0.197086	0.557442	-0.122868	0.380819	-0.161515	0.175762	-0.172062	-0.0292937	-0.348944	0.121136	0.403786	-0.221163	-0.0147442	0.0491473	0.0491473	-0.315063	-0.098093	-0.23435	0.403786	0.387904	-0.161515	0.403786	-0.190347	0.175762	-0.161515	0.262781	-0.23435	1	0.209381	-0.0292937	-0.23435	-0.161515	0.150586
PS	0.353553	0.353553	-0.141421	0.147902	0.344265	0.372104	-0.141421	0.153897	-0.205196	-0.141421	-0.205196	0.0322749	-0.141421	0.0430331	-0.0383482	-0.141421	-0.0383482	-0.14462	-0.258199	0.512989	0.353553	-0.205196	-0.150188	0.153897	0.0783421	-0.141421	0.353553	-0.193649	-0.284019	0.0430331	0.344265	0.336123	-0.0858898	0.153897	0.353553	0.411693	-0.141421	0.353553	0.0666667	0.153897	-0.141421	0.498527	0.512989	0.209381	1	-0.205196	-0.205196	-0.141421	-0.119866
PSO	-0.0725476	-0.0725476	-0.0725476	-0.0758721	-0.132453	0.135211	0.689202	-0.105263	-0.105263	-0.0725476	0.447368	-0.0993399	0.689202	-0.132453	0.255739	-0.0725476	-0.157378	0.250387	-0.132453	-0.105263	-0.0725476	-0.105263	-0.0764719	-0.105263	-0.241132	-0.0725476	-0.0725476	-0.0993399	0.039736	-0.132453	-0.132453	-0.140028	0.469979	0.447368	-0.0725476	-0.232314	-0.0725476	-0.0725476	-0.205196	-0.105263	0.689202	-0.157378	-0.105263	-0.0292937	-0.205196	1	-0.105263	-0.0725476	-0.147576
PTFE2	-0.0725476	-0.0725476	-0.0725476	-0.0758721	-0.132453	-0.198839	-0.0725476	0.447368	-0.105263	-0.0725476	-0.105263	-0.0993399	-0.0725476	-0.132453	-0.157378	0.689202	-0.157378	0.0556415	-0.132453	-0.105263	-0.0725476	-0.105263	-0.0764719	-0.105263	0.602829	-0.0725476	-0.0725476	-0.0993399	0.039736	-0.132453	-0.132453	-0.140028	-0.146868	-0.105263	-0.0725476	-0.232314	0.689202	-0.0725476	0.153897	-0.105263	-0.0725476	-0.157378	-0.105263	-0.23435	-0.205196	-0.105263	1	-0.0725476	-0.147576
PUR	-0.05	-0.05	1	0.104583	-0.0912871	-0.252154	-0.05	-0.0725476	-0.0725476	-0.05	-0.0725476	-0.0684653	-0.05	-0.0912871	-0.108465	-0.05	-0.108465	-0.230089	-0.0912871	-0.0725476	-0.05	-0.0725476	-0.0526316	-0.0725476	0.0664754	-0.05	-0.05	-0.0684653	0.602495	0.547723	-0.0912871	-0.0963739	-0.101222	-0.0725476	-0.05	-0.160111	-0.05	-0.05	-0.141421	-0.0725476	-0.05	-0.108465	-0.0725476	-0.161515	-0.141421	-0.0725476	-0.0725476	1	-0.10171
PVC	-0.10171	0.254274	-0.10171	-0.212741	-0.185695	0.423724	-0.10171	-0.147576	-0.147576	-0.10171	0.368939	-0.139272	-0.10171	0.247594	0.165479	-0.10171	0.358538	0.169017	0.464238	-0.147576	-0.10171	0.885454	-0.0899843	0.368939	-0.206592	0.254274	-0.10171	0.185695	-0.0742781	-0.185695	0.0309492	0.0218687	-0.0617715	0.110682	-0.10171	0.0888264	-0.10171	-0.10171	-0.119866	-0.147576	-0.10171	-0.0275799	0.110682	0.150586	-0.119866	-0.147576	-0.147576	-0.10171	1
PVDC	-0.05	-0.05	-0.05	0.104583	-0.0912871	-0.252154	-0.05	-0.0725476	-0.0725476	-0.05	-0.0725476	-0.0684653	-0.05	-0.0912871	-0.108465	-0.05	0.460977	0.306786	0.547723	-0.0725476	-0.05	-0.0725476	-0.0526316	-0.0725476	-0.0886339	1	-0.05	-0.0684653	-0.164317	-0.0912871	-0.0912871	-0.0963739	-0.101222	-0.0725476	-0.05	-0.160111	-0.05	-0.05	0.353553	-0.0725476	-0.05	-0.108465	-0.0725476	0.121136	-0.141421	-0.0725476	-0.0725476	-0.05	0.254274
PVDF	-0.0852803	-0.0852803	-0.0852803	-0.222971	-0.1557	-0.0373979	-0.0852803	-0.123738	-0.123738	-0.0852803	0.525885	0.291937	-0.0852803	0.116775	0.300623	-0.0852803	-0.184999	-0.0490552	0.116775	-0.123738	-0.0852803	0.525885	-0.0899843	-0.123738	0.14645	-0.0852803	-0.0852803	-0.116775	0.0467099	-0.1557	-0.1557	0.109847	-0.172645	-0.123738	-0.0852803	0.117924	-0.0852803	-0.0852803	-0.0301511	-0.123738	-0.0852803	-0.184999	-0.123738	0.20661	-0.241209	-0.123738	0.201074	-0.0852803	0.433691
RUBB	-0.130466	-0.130466	-0.130466	-0.136444	0.387069	-0.057213	0.212007	-0.189299	-0.189299	0.554479	-0.189299	0.446619	0.212007	0.387069	0.0884436	-0.130466	-0.28302	0.450282	0.178647	0.0591561	-0.130466	-0.189299	-0.138343	-0.189299	0.072273	-0.130466	0.212007	-0.178647	-0.178647	-0.0297746	-0.0297746	0.16888	-0.125457	0.0591561	0.212007	0.280103	-0.130466	-0.130466	-0.0461266	0.307612	0.212007	0.0884436	-0.189299	0.131701	-0.20757	0.0591561	0.0591561	-0.130466	-0.265392
SB	-0.05	-0.05	-0.05	0.41833	-0.0912871	-0.0219265	-0.05	-0.0725476	0.689202	-0.05	-0.0725476	-0.0684653	-0.05	-0.0912871	-0.108465	-0.05	-0.108465	0.0383482	-0.0912871	-0.0725476	-0.05	-0.0725476	-0.0526316	-0.0725476	-0.0110792	-0.05	-0.05	-0.0684653	0.219089	-0.0912871	-0.0912871	-0.0963739	-0.101222	-0.0725476	-0.05	0.145556	-0.05	-0.05	-0.141421	-0.0725476	-0.05	-0.108465	-0.0725476	0.121136	-0.141421	-0.0725476	-0.0725476	-0.05	-0.10171
SBS	-0.05	-0.05	-0.05	-0.209165	-0.0912871	0.208301	1	-0.0725476	-0.0725476	-0.05	-0.0725476	-0.0684653	1	-0.0912871	0.460977	-0.05	-0.108465	0.306786	-0.0912871	-0.0725476	-0.05	-0.0725476	-0.0526316	-0.0725476	-0.243743	-0.05	-0.05	-0.0684653	0.219089	-0.0912871	-0.0912871	-0.0963739	-0.101222	0.689202	-0.05	-0.160111	-0.05	-0.05	-0.141421	-0.0725476	1	-0.108465	-0.0725476	-0.161515	-0.141421	0.689202	-0.0725476	-0.05	-0.10171
SI	-0.0852803	-0.0852803	0.362441	-0.222971	-0.1557	-0.233737	0.362441	-0.123738	-0.123738	-0.0852803	-0.123738	-0.116775	0.362441	-0.1557	0.0578122	-0.0852803	-0.184999	-0.163517	-0.1557	-0.123738	-0.0852803	-0.123738	0.809858	-0.123738	-0.151175	-0.0852803	-0.0852803	0.700649	0.537164	0.116775	-0.1557	-0.164771	-0.172645	0.201074	-0.0852803	-0.273087	-0.0852803	-0.0852803	0.180907	-0.123738	0.362441	-0.184999	-0.123738	-0.27548	-0.241209	0.201074	-0.123738	0.362441	-0.173476
SMA	-0.05	-0.05	-0.05	0.104583	-0.0912871	-0.252154	-0.05	-0.0725476	-0.0725476	-0.05	-0.0725476	-0.0684653	-0.05	-0.0912871	0.460977	-0.05	0.460977	-0.230089	-0.0912871	-0.0725476	-0.05	-0.0725476	-0.0526316	-0.0725476	-0.243743	-0.05	-0.05	-0.0684653	0.219089	0.547723	-0.0912871	-0.0963739	-0.101222	-0.0725476	-0.05	-0.160111	-0.05	-0.05	-0.141421	-0.0725476	-0.05	-0.108465	-0.0725476	-0.161515	-0.141421	-0.0725476	-0.0725476	-0.05	-0.10171
STR	-0.05	-0.05	-0.05	0.104583	-0.0912871	-0.252154	-0.05	-0.0725476	-0.0725476	-0.05	-0.0725476	0.890049	-0.05	0.547723	-0.108465	-0.05	-0.108465	-0.230089	0.547723	-0.0725476	-0.05	-0.0725476	-0.0526316	-0.0725476	0.221585	-0.05	-0.05	-0.0684653	-0.164317	-0.0912871	-0.0912871	0.546119	-0.101222	-0.0725476	-0.05	0.145556	-0.05	-0.05	0.353553	-0.0725476	-0.05	-0.108465	-0.0725476	-0.161515	-0.141421	-0.0725476	-0.0725476	-0.05	-0.10171
WOIL	-0.05	-0.05	-0.05	0.41833	-0.0912871	-0.0219265	-0.05	-0.0725476	0.689202	-0.05	-0.0725476	-0.0684653	-0.05	-0.0912871	-0.108465	-0.05	-0.108465	0.0383482	-0.0912871	-0.0725476	-0.05	-0.0725476	-0.0526316	-0.0725476	-0.0110792	-0.05	-0.05	-0.0684653	0.219089	-0.0912871	-0.0912871	-0.0963739	-0.101222	-0.0725476	-0.05	0.145556	-0.05	-0.05	-0.141421	-0.0725476	-0.05	-0.108465	-0.0725476	0.121136	-0.141421	-0.0725476	-0.0725476	-0.05	-0.10171
[truncated: 9 more columns]

## Sheet: PCA Chem Type
		ACR	ARA	BMC	BR3	DLTDP	EPX	EVA	FEP	HDPE	HERB	HLAS	HRB	IIR	LDPE	LS770	MEL	NYL	PA	PAC	PAM	PAP	PAR	PB1	PBT	PC	PCL	PDI	PEEK	PEG	PEI	PEPQ	PES	PET	PETG	PHSI	PI	PIB	PIP	PLT	PMP	POM	PP	PPO	PPS	PS	PSO	PTFE2	PUR
	DR041120HD03	0	0	0	0	0	0	0	0	0	0	0	0	0	0	0	0	0	1	0	0	0	0	0	0	8	0	0	0	0	0	0	0	0	0	0	0	0	0	0	0	0	0	0	0	0	0	1	0
	DR041120HE02	0	0	1	1	0	0	0	0	0	0	0	0	0	0	0	0	0	0	0	0	0	0	0	0	5	0	0	0	2	1	0	0	0	0	0	0	0	0	0	0	0	0	0	0	0	0	0	1
	DR041120HG02	0	0	0	0	0	0	0	0	0	0	0	0	0	0	0	0	0	0	0	0	0	0	1	0	3	0	0	2	1	0	0	0	0	0	0	0	0	0	1	0	0	0	0	0	0	0	0	0
	DR041120HG06	0	0	0	1	0	0	0	0	0	0	0	2	0	1	0	0	0	0	1	0	0	0	0	0	7	0	0	0	0	0	0	1	0	0	0	1	0	0	1	0	0	0	0	0	0	0	0	0
	DR041120HJ03	0	0	0	1	0	0	0	0	0	0	0	0	0	0	1	0	1	0	0	0	0	0	0	0	1	0	0	0	1	1	0	0	0	0	0	0	0	0	0	0	0	0	0	0	0	0	0	0
	DR041120HJ28	0	0	0	0	0	1	0	0	1	0	0	0	0	0	0	0	0	0	0	0	0	0	0	0	1	0	0	0	0	0	1		1	0	0	0	0	0	0	0	0	0	0	0	0	0	0	0
	DR041120HM01	0	0	0	1	0	1	0	0	0	0	1	0	0	0	0	0	0	1	0	0	0	0	0	0	3	0	0	0	0	0	0	0	2	0	0	0	0	0	0	0	0	0	0	1	0	1	0	0
	DR041120HR01	1	0	0	2	0	0	0	0	0	0	0	0	0	0	0	0	0	0	0	0	1	0	0	0	10	0	0	0	0	0	0	0	0	0	0	0	0	0	1	0	0	1	1	0	1	0	0	0
	DR041120HT03	0	0	0	1	0	0	0	0	0	0	0	0	0	0	0	0	1	2	1	0	0	0	0	0	3	1	0	0	0	0	0	0	0	0	0	0	0	0	1	0	0	0	0	1	0	0	0	0
	DR042820HA10	0	0	0	0	0	0	0	0	0	0	0	0	0	0	0	0	0	1	0	0	0	0	0	0	4	0	0	0	0	0	0	0	1	0	0	0	0	0	0	0	0	0	0	0	0	0	0	0
	DR042821HA32	0	0	0	0	0	2	0	0	0	0	0	1	0	0	0	0	0	0	0	1	0	0	0	1	5	0	0	0	0	0	0	0	0	0	0	2	0	0	1	0	0	0	0	1	1	0	0	0
	UV042821HA04	0	0	0	1	0	1	0	1	0	0	0	0	0	0	0	1	0	1	0	0	0	0	0	0	11	0	0	0	1	0	0	0	0	0	0	0	1	0	1	0	0	0	0	0	0	0	1	0
	UV042821HA05	0	0	0	0	1	2	0	0	0	0	0	0	0	1	1	0	0	2	0	1	0	0	0	0	3	0	1	0	1	1	1	0	0	0	1	1	0	0	0	0	0	0	0	2	1	0	0	0
	UV042821HA11	0	0	0	0	0	2	0	0	0	0	0	0	0	0	0	0	0	1	0	0	0	0	0	0	0	0	0	0	0	0	0	0	0	0	0	0	0	1	0	0	0	1	0	2	1	0	0	0
	UV042821HA12	0	0	0	0	0	2	0	0	0	0	1	0	0	0	1	0	0	1	0	0	0	1	0	0	3	0	0	0	1	0	0	0	0	0	0	1	0	0	0	0	0	0	0	2	0	0	0	0
	UV042821HA22	0	0	0	2	0	1	0	0	1	0	0	0	0	0	0	0	0	1	0	0	0	0	0	0	4	0	0	0	1	0	0	0	0	0	0	1	0	0	0	0	0	0	0	1	0	0	0	0
	UV042821HA31	0	0	0	1	1	2	0	0	0	1	0	0	0	0	0	0	0	3	0	0	0	0	0	0	3	0	0	0	0	0	0	0	0	0	0	2	0	0	0	1	0	1	0	2	0	0	0	0
	UV042821HA34	0	0	0	0	0	2	1	0	0	0	0	0	1	0	1	0	0	2	0	0	0	0	0	0	1	0	0	0	1	0	0	0	0	1	0	0	0	0	0	0	1	0	0	0	0	1	0	0
	UV042821HA46	0	1	0	1	0	2	0	0	0	0	0	0	0	0	0	0	0	1	0	0	0	0	0	0	2	0	0	0	0	0	1	1	1	1	0	2	0	0	0	0	0	1	1	0	1	0	0	0
	UV042821HA48	0	0	0	0	0	3	0	0	0	0	0	0	0	1	0	0	1	1	1	0	0	1		1	3	0	0	1	0	0	0	0	0	0	0	0	0	0	0	0	0	0	0	0	0	0	0	0
	UV042821HA52	0	0	0	2	1	2	0	1	0	0	0	0	0	0	0	0	1	0	0	0	0	0	0	0	7	0	0	0	0	0	0	1	0	0	0	1	0	0	0	1	0	0	0	0	1	0	0	0
	Normalized Data
		ACR	ARA	BMC	BR3	DLTDP	EPX	EVA	FEP	HDPE	HERB	HLAS	HRB	IIR	LDPE	LS770	MEL	NYL	PA	PAC	PAM	PAP	PAR	PB1	PBT	PC	PCL	PDI	PEEK	PEG	PEI	PEPQ	PES	PET	PETG	PHSI	PI	PIB	PIP	PLT	PMP	POM	PP	PPO	PPS	PS	PSO	PTFE2	PUR
	DR041120HD03	-0.223607	-0.223607	-0.223607	-0.935414	-0.408248	-1.12767	-0.223607	-0.324443	-0.324443	-0.223607	-0.324443	-0.306186	-0.223607	-0.408248	-0.485071	-0.223607	-0.485071	0.171499	-0.408248	-0.324443	-0.223607	-0.324443	-0.229416	-0.324443	1.33779	-0.223607	-0.223607	-0.306186	-0.734847	-0.408248	-0.408248	-0.420084	-0.452679	-0.324443	-0.223607	-0.716039	-0.223607	-0.223607	-0.632456	-0.324443	-0.223607	-0.485071	-0.324443	-0.722315	-0.632456	-0.324443	3.08221	-0.223607
	DR041120HE02	-0.223607	-0.223607	4.47214	0.467707	-0.408248	-1.12767	-0.223607	-0.324443	-0.324443	-0.223607	-0.324443	-0.306186	-0.223607	-0.408248	-0.485071	-0.223607	-0.485071	-1.02899	-0.408248	-0.324443	-0.223607	-0.324443	-0.229416	-0.324443	0.297287	-0.223607	-0.223607	-0.306186	2.69444	2.44949	-0.408248	-0.420084	-0.452679	-0.324443	-0.223607	-0.716039	-0.223607	-0.223607	-0.632456	-0.324443	-0.223607	-0.485071	-0.324443	-0.722315	-0.632456	-0.324443	-0.324443	4.47214
	DR041120HG02	-0.223607	-0.223607	-0.223607	-0.935414	-0.408248	-1.12767	-0.223607	-0.324443	-0.324443	-0.223607	-0.324443	-0.306186	-0.223607	-0.408248	-0.485071	-0.223607	-0.485071	-1.02899	-0.408248	-0.324443	-0.223607	-0.324443	4.3589	-0.324443	-0.396383	-0.223607	-0.223607	3.98042	0.979796	-0.408248	-0.408248	-0.420084	-0.452679	-0.324443	-0.223607	-0.716039	-0.223607	-0.223607	1.58114	-0.324443	-0.223607	-0.485071	-0.324443	-0.722315	-0.632456	-0.324443	-0.324443	-0.223607
	DR041120HG06	-0.223607	-0.223607	-0.223607	0.467707	-0.408248	-1.12767	-0.223607	-0.324443	-0.324443	-0.223607	-0.324443	3.98042	-0.223607	2.44949	-0.485071	-0.223607	-0.485071	-1.02899	2.44949	-0.324443	-0.223607	-0.324443	-0.229416	-0.324443	0.990957	-0.223607	-0.223607	-0.306186	-0.734847	-0.408248	-0.408248	2.38048	-0.452679	-0.324443	-0.223607	0.650945	-0.223607	-0.223607	1.58114	-0.324443	-0.223607	-0.485071	-0.324443	-0.722315	-0.632456	-0.324443	-0.324443	-0.223607
	DR041120HJ03	-0.223607	-0.223607	-0.223607	0.467707	-0.408248	-1.12767	-0.223607	-0.324443	-0.324443	-0.223607	-0.324443	-0.306186	-0.223607	-0.408248	2.06155	-0.223607	2.06155	-1.02899	-0.408248	-0.324443	-0.223607	-0.324443	-0.229416	-0.324443	-1.09005	-0.223607	-0.223607	-0.306186	0.979796	2.44949	-0.408248	-0.420084	-0.452679	-0.324443	-0.223607	-0.716039	-0.223607	-0.223607	-0.632456	-0.324443	-0.223607	-0.485071	-0.324443	-0.722315	-0.632456	-0.324443	-0.324443	-0.223607
	DR041120HJ28	-0.223607	-0.223607	-0.223607	-0.935414	-0.408248	-0.0980581	-0.223607	-0.324443	3.08221	-0.223607	-0.324443	-0.306186	-0.223607	-0.408248	-0.485071	-0.223607	-0.485071	-1.02899	-0.408248	-0.324443	-0.223607	-0.324443	-0.229416	-0.324443	-1.09005	-0.223607	-0.223607	-0.306186	-0.734847	-0.408248	2.44949	-0.420084	1.44857	-0.324443	-0.223607	-0.716039	-0.223607	-0.223607	-0.632456	-0.324443	-0.223607	-0.485071	-0.324443	-0.722315	-0.632456	-0.324443	-0.324443	-0.223607
	DR041120HM01	-0.223607	-0.223607	-0.223607	0.467707	-0.408248	-0.0980581	-0.223607	-0.324443	-0.324443	-0.223607	3.08221	-0.306186	-0.223607	-0.408248	-0.485071	-0.223607	-0.485071	0.171499	-0.408248	-0.324443	-0.223607	-0.324443	-0.229416	-0.324443	-0.396383	-0.223607	-0.223607	-0.306186	-0.734847	-0.408248	-0.408248	-0.420084	3.34982	-0.324443	-0.223607	-0.716039	-0.223607	-0.223607	-0.632456	-0.324443	-0.223607	-0.485071	-0.324443	0.541736	-0.632456	3.08221	-0.324443	-0.223607
	DR041120HR01	4.47214	-0.223607	-0.223607	1.87083	-0.408248	-1.12767	-0.223607	-0.324443	-0.324443	-0.223607	-0.324443	-0.306186	-0.223607	-0.408248	-0.485071	-0.223607	-0.485071	-1.02899	-0.408248	-0.324443	4.47214	-0.324443	-0.229416	-0.324443	2.03146	-0.223607	-0.223607	-0.306186	-0.734847	-0.408248	-0.408248	-0.420084	-0.452679	-0.324443	-0.223607	-0.716039	-0.223607	-0.223607	1.58114	-0.324443	-0.223607	2.06155	3.08221	-0.722315	1.58114	-0.324443	-0.324443	-0.223607
	DR041120HT03	-0.223607	-0.223607	-0.223607	0.467707	-0.408248	-1.12767	-0.223607	-0.324443	-0.324443	-0.223607	-0.324443	-0.306186	-0.223607	-0.408248	-0.485071	-0.223607	2.06155	1.37199	2.44949	-0.324443	-0.223607	-0.324443	-0.229416	-0.324443	-0.396383	4.47214	-0.223607	-0.306186	-0.734847	-0.408248	-0.408248	-0.420084	-0.452679	-0.324443	-0.223607	-0.716039	-0.223607	-0.223607	1.58114	-0.324443	-0.223607	-0.485071	-0.324443	0.541736	-0.632456	-0.324443	-0.324443	-0.223607
	DR042820HA10	-0.223607	-0.223607	-0.223607	-0.935414	-0.408248	-1.12767	-0.223607	-0.324443	-0.324443	-0.223607	-0.324443	-0.306186	-0.223607	-0.408248	-0.485071	-0.223607	-0.485071	0.171499	-0.408248	-0.324443	-0.223607	-0.324443	-0.229416	-0.324443	-0.0495479	-0.223607	-0.223607	-0.306186	-0.734847	-0.408248	-0.408248	-0.420084	1.44857	-0.324443	-0.223607	-0.716039	-0.223607	-0.223607	-0.632456	-0.324443	-0.223607	-0.485071	-0.324443	-0.722315	-0.632456	-0.324443	-0.324443	-0.223607
	DR042821HA32	-0.223607	-0.223607	-0.223607	-0.935414	-0.408248	0.931552	-0.223607	-0.324443	-0.324443	-0.223607	-0.324443	1.83712	-0.223607	-0.408248	-0.485071	-0.223607	-0.485071	-1.02899	-0.408248	3.08221	-0.223607	-0.324443	-0.229416	3.08221	0.297287	-0.223607	-0.223607	-0.306186	-0.734847	-0.408248	-0.408248	-0.420084	-0.452679	-0.324443	-0.223607	2.01793	-0.223607	-0.223607	1.58114	-0.324443	-0.223607	-0.485071	-0.324443	0.541736	1.58114	-0.324443	-0.324443	-0.223607
	UV042821HA04	-0.223607	-0.223607	-0.223607	0.467707	-0.408248	-0.0980581	-0.223607	3.08221	-0.324443	-0.223607	-0.324443	-0.306186	-0.223607	-0.408248	-0.485071	4.47214	-0.485071	0.171499	-0.408248	-0.324443	-0.223607	-0.324443	-0.229416	-0.324443	2.3783	-0.223607	-0.223607	-0.306186	0.979796	-0.408248	-0.408248	-0.420084	-0.452679	-0.324443	-0.223607	-0.716039	4.47214	-0.223607	1.58114	-0.324443	-0.223607	-0.485071	-0.324443	-0.722315	-0.632456	-0.324443	3.08221	-0.223607
	UV042821HA05	-0.223607	-0.223607	-0.223607	-0.935414	2.44949	0.931552	-0.223607	-0.324443	-0.324443	-0.223607	-0.324443	-0.306186	-0.223607	2.44949	2.06155	-0.223607	-0.485071	1.37199	-0.408248	3.08221	-0.223607	-0.324443	-0.229416	-0.324443	-0.396383	-0.223607	4.47214	-0.306186	0.979796	2.44949	2.44949	-0.420084	-0.452679	-0.324443	4.47214	0.650945	-0.223607	-0.223607	-0.632456	-0.324443	-0.223607	-0.485071	-0.324443	1.80579	1.58114	-0.324443	-0.324443	-0.223607
	UV042821HA11	-0.223607	-0.223607	-0.223607	-0.935414	-0.408248	0.931552	-0.223607	-0.324443	-0.324443	-0.223607	-0.324443	-0.306186	-0.223607	-0.408248	-0.485071	-0.223607	-0.485071	0.171499	-0.408248	-0.324443	-0.223607	-0.324443	-0.229416	-0.324443	-1.43689	-0.223607	-0.223607	-0.306186	-0.734847	-0.408248	-0.408248	-0.420084	-0.452679	-0.324443	-0.223607	-0.716039	-0.223607	4.47214	-0.632456	-0.324443	-0.223607	2.06155	-0.324443	1.80579	1.58114	-0.324443	-0.324443	-0.223607
	UV042821HA12	-0.223607	-0.223607	-0.223607	-0.935414	-0.408248	0.931552	-0.223607	-0.324443	-0.324443	-0.223607	3.08221	-0.306186	-0.223607	-0.408248	2.06155	-0.223607	-0.485071	0.171499	-0.408248	-0.324443	-0.223607	3.08221	-0.229416	-0.324443	-0.396383	-0.223607	-0.223607	-0.306186	0.979796	-0.408248	-0.408248	-0.420084	-0.452679	-0.324443	-0.223607	0.650945	-0.223607	-0.223607	-0.632456	-0.324443	-0.223607	-0.485071	-0.324443	1.80579	-0.632456	-0.324443	-0.324443	-0.223607
	UV042821HA22	-0.223607	-0.223607	-0.223607	1.87083	-0.408248	-0.0980581	-0.223607	-0.324443	3.08221	-0.223607	-0.324443	-0.306186	-0.223607	-0.408248	-0.485071	-0.223607	-0.485071	0.171499	-0.408248	-0.324443	-0.223607	-0.324443	-0.229416	-0.324443	-0.0495479	-0.223607	-0.223607	-0.306186	0.979796	-0.408248	-0.408248	-0.420084	-0.452679	-0.324443	-0.223607	0.650945	-0.223607	-0.223607	-0.632456	-0.324443	-0.223607	-0.485071	-0.324443	0.541736	-0.632456	-0.324443	-0.324443	-0.223607
	UV042821HA31	-0.223607	-0.223607	-0.223607	0.467707	2.44949	0.931552	-0.223607	-0.324443	-0.324443	4.47214	-0.324443	-0.306186	-0.223607	-0.408248	-0.485071	-0.223607	-0.485071	2.57248	-0.408248	-0.324443	-0.223607	-0.324443	-0.229416	-0.324443	-0.396383	-0.223607	-0.223607	-0.306186	-0.734847	-0.408248	-0.408248	-0.420084	-0.452679	-0.324443	-0.223607	2.01793	-0.223607	-0.223607	-0.632456	3.08221	-0.223607	2.06155	-0.324443	1.80579	-0.632456	-0.324443	-0.324443	-0.223607
	UV042821HA34	-0.223607	-0.223607	-0.223607	-0.935414	-0.408248	0.931552	4.47214	-0.324443	-0.324443	-0.223607	-0.324443	-0.306186	4.47214	-0.408248	2.06155	-0.223607	-0.485071	1.37199	-0.408248	-0.324443	-0.223607	-0.324443	-0.229416	-0.324443	-1.09005	-0.223607	-0.223607	-0.306186	0.979796	-0.408248	-0.408248	-0.420084	-0.452679	3.08221	-0.223607	-0.716039	-0.223607	-0.223607	-0.632456	-0.324443	4.47214	-0.485071	-0.324443	-0.722315	-0.632456	3.08221	-0.324443	-0.223607
	UV042821HA46	-0.223607	4.47214	-0.223607	0.467707	-0.408248	0.931552	-0.223607	-0.324443	-0.324443	-0.223607	-0.324443	-0.306186	-0.223607	-0.408248	-0.485071	-0.223607	-0.485071	0.171499	-0.408248	-0.324443	-0.223607	-0.324443	-0.229416	-0.324443	-0.743218	-0.223607	-0.223607	-0.306186	-0.734847	-0.408248	2.44949	2.38048	1.44857	3.08221	-0.223607	2.01793	-0.223607	-0.223607	-0.632456	-0.324443	-0.223607	2.06155	3.08221	-0.722315	1.58114	-0.324443	-0.324443	-0.223607
	UV042821HA48	-0.223607	-0.223607	-0.223607	-0.935414	-0.408248	1.96116	-0.223607	-0.324443	-0.324443	-0.223607	-0.324443	-0.306186	-0.223607	2.44949	-0.485071	-0.223607	2.06155	0.171499	2.44949	-0.324443	-0.223607	3.08221	-0.229416	3.08221	-0.396383	-0.223607	-0.223607	1.83712	-0.734847	-0.408248	-0.408248	-0.420084	-0.452679	-0.324443	-0.223607	-0.716039	-0.223607	-0.223607	-0.632456	-0.324443	-0.223607	-0.485071	-0.324443	-0.722315	-0.632456	-0.324443	-0.324443	-0.223607
	UV042821HA52	-0.223607	-0.223607	-0.223607	1.87083	2.44949	0.931552	-0.223607	3.08221	-0.324443	-0.223607	-0.324443	-0.306186	-0.223607	-0.408248	-0.485071	-0.223607	2.06155	-1.02899	-0.408248	-0.324443	-0.223607	-0.324443	-0.229416	-0.324443	0.990957	-0.223607	-0.223607	-0.306186	-0.734847	-0.408248	-0.408248	2.38048	-0.452679	-0.324443	-0.223607	0.650945	-0.223607	-0.223607	-0.632456	3.08221	-0.223607	-0.485071	-0.324443	-0.722315	1.58114	-0.324443	-0.324443	-0.223607
	Correlation Matrix from Data - Data Analysis
		ACR	ARA	BMC	BR3	DLTDP	EPX	EVA	FEP	HDPE	HERB	HLAS	HRB	IIR	LDPE	LS770	MEL	NYL	PA	PAC	PAM	PAP	PAR	PB1	PBT	PC	PCL	PDI	PEEK	PEG	PEI	PEPQ	PES	PET	PETG	PHSI	PI	PIB	PIP	PLT	PMP	POM	PP	PPO	PPS	PS	PSO	PTFE2	PUR
	ACR	1	-0.05	-0.05	0.41833	-0.0912871	-0.252154	-0.05	-0.0725476	-0.0725476	-0.05	-0.0725476	-0.0684653	-0.05	-0.0912871	-0.108465	-0.05	-0.108465	-0.230089	-0.0912871	-0.0725476	1	-0.0725476	-0.05	-0.0725476	0.454249	-0.05	-0.05	-0.0684653	-0.164317	-0.0912871	-0.0912871	-0.0912871	-0.101222	-0.0725476	-0.05	-0.160111	-0.05	-0.05	0.353553	-0.0725476	-0.05	0.460977	0.689202	-0.161515	0.353553	-0.0725476	-0.0725476	-0.05
	ARA	-0.05	1	-0.05	0.104583	-0.0912871	0.208301	-0.05	-0.0725476	-0.0725476	-0.05	-0.0725476	-0.0684653	-0.05	-0.0912871	-0.108465	-0.05	-0.108465	0.0383482	-0.0912871	-0.0725476	-0.05	-0.0725476	-0.05	-0.0725476	-0.166189	-0.05	-0.05	-0.0684653	-0.164317	-0.0912871	0.547723	0.547723	0.323911	0.689202	-0.05	0.451222	-0.05	-0.05	-0.141421	-0.0725476	-0.05	0.460977	0.689202	-0.161515	0.353553	-0.0725476	-0.0725476	-0.05
	BMC	-0.05	-0.05	1	0.104583	-0.0912871	-0.252154	-0.05	-0.0725476	-0.0725476	-0.05	-0.0725476	-0.0684653	-0.05	-0.0912871	-0.108465	-0.05	-0.108465	-0.230089	-0.0912871	-0.0725476	-0.05	-0.0725476	-0.05	-0.0725476	0.0664754	-0.05	-0.05	-0.0684653	0.602495	0.547723	-0.0912871	-0.0912871	-0.101222	-0.0725476	-0.05	-0.160111	-0.05	-0.05	-0.141421	-0.0725476	-0.05	-0.108465	-0.0725476	-0.161515	-0.141421	-0.0725476	-0.0725476	1
	BR3	0.41833	0.104583	0.104583	1	0.190941	-0.229312	-0.209165	0.379361	0.151744	0.104583	-0.0758721	1.58603e-17	-0.209165	-0.190941	-0.283589	0.104583	0.226871	-0.160422	-3.70074e-17	-0.303488	0.41833	-0.303488	-0.209165	-0.303488	0.440304	0.104583	-0.209165	-0.286411	-3.17207e-17	-1.05736e-17	-0.190941	0.381881	-0.0423442	-0.0758721	-0.209165	0.152226	0.104583	-0.209165	0.147902	0.379361	-0.209165	0.226871	0.379361	-0.168916	0.147902	-0.0758721	-0.0758721	0.104583
	DLTDP	-0.0912871	-0.0912871	-0.0912871	0.190941	1	0.380304	-0.0912871	0.331133	-0.132453	0.547723	-0.132453	-0.125	-0.0912871	0.222222	0.148522	-0.0912871	0.148522	0.396746	-0.166667	0.331133	-0.0912871	-0.132453	-0.0912871	-0.132453	0.0269704	-0.0912871	0.547723	-0.125	-0.0666667	0.222222	0.222222	0.222222	-0.184805	-0.132453	0.547723	0.45177	-0.0912871	-0.0912871	-0.258199	0.794719	-0.0912871	0.148522	-0.132453	0.393179	0.344265	-0.132453	-0.132453	-0.0912871
	EPX	-0.252154	0.208301	-0.252154	-0.229312	0.380304	1	0.208301	0.135211	-0.0318142	0.208301	0.135211	-0.135108	0.208301	0.240192	0.202152	-0.0219265	0.0772934	0.36997	-0.040032	0.302235	-0.252154	0.46926	-0.252154	0.46926	-0.327953	-0.252154	0.208301	-0.030024	-0.156125	-0.180144	0.240192	0.10008	-0.0443888	0.302235	0.208301	0.465962	-0.0219265	0.208301	-0.387609	0.302235	0.208301	0.202152	-0.0318142	0.424973	0.372104	0.135211	-0.198839	-0.252154
	EVA	-0.05	-0.05	-0.05	-0.209165	-0.0912871	0.208301	1	-0.0725476	-0.0725476	-0.05	-0.0725476	-0.0684653	1	-0.0912871	0.460977	-0.05	-0.108465	0.306786	-0.0912871	-0.0725476	-0.05	-0.0725476	-0.05	-0.0725476	-0.243743	-0.05	-0.05	-0.0684653	0.219089	-0.0912871	-0.0912871	-0.0912871	-0.101222	0.689202	-0.05	-0.160111	-0.05	-0.05	-0.141421	-0.0725476	1	-0.108465	-0.0725476	-0.161515	-0.141421	0.689202	-0.0725476	-0.05
	FEP	-0.0725476	-0.0725476	-0.0725476	0.379361	0.331133	0.135211	-0.0725476	1	-0.105263	-0.0725476	-0.105263	-0.0993399	-0.0725476	-0.132453	-0.157378	0.689202	0.255739	-0.139104	-0.132453	-0.105263	-0.0725476	-0.105263	-0.0725476	-0.105263	0.546565	-0.0725476	-0.0725476	-0.0993399	0.039736	-0.132453	-0.132453	0.331133	-0.146868	-0.105263	-0.0725476	-0.0105597	0.689202	-0.0725476	0.153897	0.447368	-0.0725476	-0.157378	-0.105263	-0.23435	0.153897	-0.105263	0.447368	-0.0725476
	HDPE	-0.0725476	-0.0725476	-0.0725476	0.151744	-0.132453	-0.0318142	-0.0725476	-0.105263	1	-0.0725476	-0.105263	-0.0993399	-0.0725476	-0.132453	-0.157378	-0.0725476	-0.157378	-0.139104	-0.132453	-0.105263	-0.0725476	-0.105263	-0.0725476	-0.105263	-0.184868	-0.0725476	-0.0725476	-0.0993399	0.039736	-0.132453	0.331133	-0.132453	0.161555	-0.105263	-0.0725476	-0.0105597	-0.0725476	-0.0725476	-0.205196	-0.105263	-0.0725476	-0.157378	-0.105263	-0.0292937	-0.205196	-0.105263	-0.105263	-0.0725476
	HERB	-0.05	-0.05	-0.05	0.104583	0.547723	0.208301	-0.05	-0.0725476	-0.0725476	1	-0.0725476	-0.0684653	-0.05	-0.0912871	-0.108465	-0.05	-0.108465	0.575224	-0.0912871	-0.0725476	-0.05	-0.0725476	-0.05	-0.0725476	-0.0886339	-0.05	-0.05	-0.0684653	-0.164317	-0.0912871	-0.0912871	-0.0912871	-0.101222	-0.0725476	-0.05	0.451222	-0.05	-0.05	-0.141421	0.689202	-0.05	0.460977	-0.0725476	0.403786	-0.141421	-0.0725476	-0.0725476	-0.05
	HLAS	-0.0725476	-0.0725476	-0.0725476	-0.0758721	-0.132453	0.135211	-0.0725476	-0.105263	-0.105263	-0.0725476	1	-0.0993399	-0.0725476	-0.132453	0.255739	-0.0725476	-0.157378	0.0556415	-0.132453	-0.105263	-0.0725476	0.447368	-0.0725476	-0.105263	-0.128604	-0.0725476	-0.0725476	-0.0993399	0.039736	-0.132453	-0.132453	-0.132453	0.469979	-0.105263	-0.0725476	-0.0105597	-0.0725476	-0.0725476	-0.205196	-0.105263	-0.0725476	-0.157378	-0.105263	0.380819	-0.205196	0.447368	-0.105263	-0.0725476
	HRB	-0.0684653	-0.0684653	-0.0684653	1.58603e-17	-0.125	-0.135108	-0.0684653	-0.0993399	-0.0993399	-0.0684653	-0.0993399	1	-0.0684653	0.458333	-0.148522	-0.0684653	-0.148522	-0.315063	0.458333	0.24835	-0.0684653	-0.0993399	-0.0684653	0.24835	0.23262	-0.0684653	-0.0684653	-0.09375	-0.225	-0.125	-0.125	0.458333	-0.138604	-0.0993399	-0.0684653	0.338827	-0.0684653	-0.0684653	0.484123	-0.0993399	-0.0684653	-0.148522	-0.0993399	-0.0921512	0.0322749	-0.0993399	-0.0993399	-0.0684653
	IIR	-0.05	-0.05	-0.05	-0.209165	-0.0912871	0.208301	1	-0.0725476	-0.0725476	-0.05	-0.0725476	-0.0684653	1	-0.0912871	0.460977	-0.05	-0.108465	0.306786	-0.0912871	-0.0725476	-0.05	-0.0725476	-0.05	-0.0725476	-0.243743	-0.05	-0.05	-0.0684653	0.219089	-0.0912871	-0.0912871	-0.0912871	-0.101222	0.689202	-0.05	-0.160111	-0.05	-0.05	-0.141421	-0.0725476	1	-0.108465	-0.0725476	-0.161515	-0.141421	0.689202	-0.0725476	-0.05
	LDPE	-0.0912871	-0.0912871	-0.0912871	-0.190941	0.222222	0.240192	-0.0912871	-0.132453	-0.132453	-0.0912871	-0.132453	0.458333	-0.0912871	1	0.148522	-0.0912871	0.148522	0.070014	0.611111	0.331133	-0.0912871	0.331133	-0.0912871	0.331133	0.0269704	-0.0912871	0.547723	0.166667	-0.0666667	0.222222	0.222222	0.222222	-0.184805	-0.132453	0.547723	0.0797241	-0.0912871	-0.0912871	0.0430331	-0.132453	-0.0912871	-0.19803	-0.132453	0.0491473	0.0430331	-0.132453	-0.132453	-0.0912871
	LS770	-0.108465	-0.108465	-0.108465	-0.283589	0.148522	0.202152	0.460977	-0.157378	-0.157378	-0.108465	0.255739	-0.148522	0.460977	0.148522	1	-0.108465	0.0735294	0.22877	-0.19803	0.255739	-0.108465	0.255739	-0.108465	-0.157378	-0.360514	-0.108465	0.460977	-0.148522	0.475271	0.495074	0.148522	-0.19803	-0.219581	0.255739	0.460977	-0.0157877	-0.108465	-0.108465	-0.306786	-0.157378	0.460977	-0.235294	-0.157378	0.262781	-0.0383482	0.255739	-0.157378	-0.108465
	MEL	-0.05	-0.05	-0.05	0.104583	-0.0912871	-0.0219265	-0.05	0.689202	-0.0725476	-0.05	-0.0725476	-0.0684653	-0.05	-0.0912871	-0.108465	1	-0.108465	0.0383482	-0.0912871	-0.0725476	-0.05	-0.0725476	-0.05	-0.0725476	0.531804	-0.05	-0.05	-0.0684653	0.219089	-0.0912871	-0.0912871	-0.0912871	-0.101222	-0.0725476	-0.05	-0.160111	1	-0.05	0.353553	-0.0725476	-0.05	-0.108465	-0.0725476	-0.161515	-0.141421	-0.0725476	0.689202	-0.05
	NYL	-0.108465	-0.108465	-0.108465	0.226871	0.148522	0.0772934	-0.108465	0.255739	-0.157378	-0.108465	-0.157378	-0.148522	-0.108465	0.148522	0.0735294	-0.108465	1	-0.0623918	0.495074	-0.157378	-0.108465	0.255739	-0.108465	0.255739	-0.108154	0.460977	-0.108465	0.111392	-0.148522	0.148522	-0.19803	0.148522	-0.219581	-0.157378	-0.108465	-0.181559	-0.108465	-0.108465	-0.0383482	0.255739	-0.108465	-0.235294	-0.157378	-0.197086	-0.0383482	-0.157378	-0.157378	-0.108465
	PA	-0.230089	0.0383482	-0.230089	-0.160422	0.396746	0.36997	0.306786	-0.139104	-0.139104	0.575224	0.0556415	-0.315063	0.306786	0.070014	0.22877	0.0383482	-0.0623918	1	0.070014	0.0556415	-0.230089	0.0556415	-0.230089	-0.139104	-0.269084	0.306786	0.306786	-0.192539	-0.070014	-0.093352	0.070014	-0.256718	-0.0310535	0.250387	0.306786	0.200945	0.0383482	0.0383482	-0.271163	0.250387	0.306786	0.22877	-0.139104	0.557442	-0.14462	0.250387	0.0556415	-0.230089
	PAC	-0.0912871	-0.0912871	-0.0912871	-3.70074e-17	-0.166667	-0.040032	-0.0912871	-0.132453	-0.132453	-0.0912871	-0.132453	0.458333	-0.0912871	0.611111	-0.19803	-0.0912871	0.495074	0.070014	1	-0.132453	-0.0912871	0.331133	-0.0912871	0.331133	0.0269704	0.547723	-0.0912871	0.166667	-0.3	-0.166667	-0.166667	0.222222	-0.184805	-0.132453	-0.0912871	-0.106299	-0.0912871	-0.0912871	0.344265	-0.132453	-0.0912871	-0.19803	-0.132453	-0.122868	-0.258199	-0.132453	-0.132453	-0.0912871
	PAM	-0.0725476	-0.0725476	-0.0725476	-0.303488	0.331133	0.302235	-0.0725476	-0.105263	-0.105263	-0.0725476	-0.105263	0.24835	-0.0725476	0.331133	0.255739	-0.0725476	-0.157378	0.0556415	-0.132453	1	-0.0725476	-0.105263	-0.0725476	0.447368	-0.0160755	-0.0725476	0.689202	-0.0993399	0.039736	0.331133	0.331133	-0.132453	-0.146868	-0.105263	0.689202	0.432948	-0.0725476	-0.0725476	0.153897	-0.105263	-0.0725476	-0.157378	-0.105263	0.380819	0.512989	-0.105263	-0.105263	-0.0725476
	PAP	1	-0.05	-0.05	0.41833	-0.0912871	-0.252154	-0.05	-0.0725476	-0.0725476	-0.05	-0.0725476	-0.0684653	-0.05	-0.0912871	-0.108465	-0.05	-0.108465	-0.230089	-0.0912871	-0.0725476	1	-0.0725476	-0.05	-0.0725476	0.454249	-0.05	-0.05	-0.0684653	-0.164317	-0.0912871	-0.0912871	-0.0912871	-0.101222	-0.0725476	-0.05	-0.160111	-0.05	-0.05	0.353553	-0.0725476	-0.05	0.460977	0.689202	-0.161515	0.353553	-0.0725476	-0.0725476	-0.05
	PAR	-0.0725476	-0.0725476	-0.0725476	-0.303488	-0.132453	0.46926	-0.0725476	-0.105263	-0.105263	-0.0725476	0.447368	-0.0993399	-0.0725476	0.331133	0.255739	-0.0725476	0.255739	0.0556415	0.331133	-0.105263	-0.0725476	1	-0.0725476	0.447368	-0.128604	-0.0725476	-0.0725476	0.24835	0.039736	-0.132453	-0.132453	-0.132453	-0.146868	-0.105263	-0.0725476	-0.0105597	-0.0725476	-0.0725476	-0.205196	-0.105263	-0.0725476	-0.157378	-0.105263	0.175762	-0.205196	-0.105263	-0.105263	-0.0725476
	PB1	-0.05	-0.05	-0.05	-0.209165	-0.0912871	-0.252154	-0.05	-0.0725476	-0.0725476	-0.05	-0.0725476	-0.0684653	-0.05	-0.0912871	-0.108465	-0.05	-0.108465	-0.230089	-0.0912871	-0.0725476	-0.05	-0.0725476	1	-0.0725476	-0.0886339	-0.05	-0.05	0.890049	0.219089	-0.0912871	-0.0912871	-0.0912871	-0.101222	-0.0725476	-0.05	-0.160111	-0.05	-0.05	0.353553	-0.0725476	-0.05	-0.108465	-0.0725476	-0.161515	-0.141421	-0.0725476	-0.0725476	-0.05
	PBT	-0.0725476	-0.0725476	-0.0725476	-0.303488	-0.132453	0.46926	-0.0725476	-0.105263	-0.105263	-0.0725476	-0.105263	0.24835	-0.0725476	0.331133	-0.157378	-0.0725476	0.255739	-0.139104	0.331133	0.447368	-0.0725476	0.447368	-0.0725476	1	-0.0160755	-0.0725476	-0.0725476	0.24835	-0.238416	-0.132453	-0.132453	-0.132453	-0.146868	-0.105263	-0.0725476	0.211194	-0.0725476	-0.0725476	0.153897	-0.105263	-0.0725476	-0.157378	-0.105263	-0.0292937	0.153897	-0.105263	-0.105263	-0.0725476
	PC	0.454249	-0.166189	0.0664754	0.440304	0.0269704	-0.327953	-0.243743	0.546565	-0.184868	-0.0886339	-0.128604	0.23262	-0.243743	0.0269704	-0.360514	0.531804	-0.108154	-0.269084	0.0269704	-0.0160755	0.454249	-0.128604	-0.0886339	-0.0160755	1	-0.0886339	-0.0886339	-0.121367	-0.0364101	-0.161823	-0.303418	0.168565	-0.242236	-0.297396	-0.0886339	-0.0354782	0.531804	-0.321298	0.517058	0.0964527	-0.243743	-0.0660942	0.208981	-0.348944	0.0783421	-0.241132	0.602829	0.0664754
	PCL	-0.05	-0.05	-0.05	0.104583	-0.0912871	-0.252154	-0.05	-0.0725476	-0.0725476	-0.05	-0.0725476	-0.0684653	-0.05	-0.0912871	-0.108465	-0.05	0.460977	0.306786	0.547723	-0.0725476	-0.05	-0.0725476	-0.05	-0.0725476	-0.0886339	1	-0.05	-0.0684653	-0.164317	-0.0912871	-0.0912871	-0.0912871	-0.101222	-0.0725476	-0.05	-0.160111	-0.05	-0.05	0.353553	-0.0725476	-0.05	-0.108465	-0.0725476	0.121136	-0.141421	-0.0725476	-0.0725476	-0.05
	PDI	-0.05	-0.05	-0.05	-0.209165	0.547723	0.208301	-0.05	-0.0725476	-0.0725476	-0.05	-0.0725476	-0.0684653	-0.05	0.547723	0.460977	-0.05	-0.108465	0.306786	-0.0912871	0.689202	-0.05	-0.0725476	-0.05	-0.0725476	-0.0886339	-0.05	1	-0.0684653	0.219089	0.547723	0.547723	-0.0912871	-0.101222	-0.0725476	1	0.145556	-0.05	-0.05	-0.141421	-0.0725476	-0.05	-0.108465	-0.0725476	0.403786	0.353553	-0.0725476	-0.0725476	-0.05
	PEEK	-0.0684653	-0.0684653	-0.0684653	-0.286411	-0.125	-0.030024	-0.0684653	-0.0993399	-0.0993399	-0.0684653	-0.0993399	-0.09375	-0.0684653	0.166667	-0.148522	-0.0684653	0.111392	-0.192539	0.166667	-0.0993399	-0.0684653	0.24835	0.890049	0.24835	-0.121367	-0.0684653	-0.0684653	1	0.125	-0.125	-0.125	-0.125	-0.138604	-0.0993399	-0.0684653	-0.219241	-0.0684653	-0.0684653	0.258199	-0.0993399	-0.0684653	-0.148522	-0.0993399	-0.221163	-0.193649	-0.0993399	-0.0993399	-0.0684653
	PEG	-0.164317	-0.164317	0.602495	-3.17207e-17	-0.0666667	-0.156125	0.219089	0.039736	0.039736	-0.164317	0.039736	-0.225	0.219089	-0.0666667	0.475271	0.219089	-0.148522	-0.070014	-0.3	0.039736	-0.164317	0.039736	0.219089	-0.238416	-0.0364101	-0.164317	0.219089	0.125	1	0.633333	-0.0666667	-0.3	-0.33265	0.039736	0.219089	-0.191338	0.219089	-0.164317	-0.10328	-0.238416	0.219089	-0.356453	-0.238416	-0.0147442	-0.284019	0.039736	0.039736	0.602495
	PEI	-0.0912871	-0.0912871	0.547723	-1.05736e-17	0.222222	-0.180144	-0.0912871	-0.132453	-0.132453	-0.0912871	-0.132453	-0.125	-0.0912871	0.222222	0.495074	-0.0912871	0.148522	-0.093352	-0.166667	0.331133	-0.0912871	-0.132453	-0.0912871	-0.132453	-0.161823	-0.0912871	0.547723	-0.125	0.633333	1	0.222222	-0.166667	-0.184805	-0.132453	0.547723	-0.106299	-0.0912871	-0.0912871	-0.258199	-0.132453	-0.0912871	-0.19803	-0.132453	0.0491473	0.0430331	-0.132453	-0.132453	0.547723
	PEPQ	-0.0912871	0.547723	-0.0912871	-0.190941	0.222222	0.240192	-0.0912871	-0.132453	0.331133	-0.0912871	-0.132453	-0.125	-0.0912871	0.222222	0.148522	-0.0912871	-0.19803	0.070014	-0.166667	0.331133	-0.0912871	-0.132453	-0.0912871	-0.132453	-0.303418	-0.0912871	0.547723	-0.125	-0.0666667	0.222222	1	0.222222	0.33265	0.331133	0.547723	0.265747	-0.0912871	-0.0912871	-0.258199	-0.132453	-0.0912871	0.148522	0.331133	0.0491473	0.344265	-0.132453	-0.132453	-0.0912871
	PES	-0.0912871	0.547723	-0.0912871	0.381881	0.222222	0.10008	-0.0912871	0.331133	-0.132453	-0.0912871	-0.132453	0.458333	-0.0912871	0.222222	-0.19803	-0.0912871	0.148522	-0.256718	0.222222	-0.132453	-0.0912871	-0.132453	-0.0912871	-0.132453	0.168565	-0.0912871	-0.0912871	-0.125	-0.3	-0.166667	0.222222	1	0.0739221	0.331133	-0.0912871	0.45177	-0.0912871	-0.0912871	0.0430331	0.331133	-0.0912871	0.148522	0.331133	-0.294884	0.344265	-0.132453	-0.132453	-0.0912871
	PET	-0.101222	0.323911	-0.101222	-0.0423442	-0.184805	-0.0443888	-0.101222	-0.146868	0.161555	-0.101222	0.469979	-0.138604	-0.101222	-0.184805	-0.219581	-0.101222	-0.219581	-0.0310535	-0.184805	-0.146868	-0.101222	-0.146868	-0.101222	-0.146868	-0.242236	-0.101222	-0.101222	-0.138604	-0.33265	-0.184805	0.33265	0.0739221	1	0.161555	-0.101222	-0.0766139	-0.101222	-0.101222	-0.286299	-0.146868	-0.101222	0.0109791	0.161555	-0.098093	-0.0858898	0.469979	-0.146868	-0.101222
	PETG	-0.0725476	0.689202	-0.0725476	-0.0758721	-0.132453	0.302235	0.689202	-0.105263	-0.105263	-0.0725476	-0.105263	-0.0993399	0.689202	-0.132453	0.255739	-0.0725476	-0.157378	0.250387	-0.132453	-0.105263	-0.0725476	-0.105263	-0.0725476	-0.105263	-0.297396	-0.0725476	-0.0725476	-0.0993399	0.039736	-0.132453	0.331133	0.331133	0.161555	1	-0.0725476	0.211194	-0.0725476	-0.0725476	-0.205196	-0.105263	0.689202	0.255739	0.447368	-0.23435	0.153897	0.447368	-0.105263	-0.0725476
	PHSI	-0.05	-0.05	-0.05	-0.209165	0.547723	0.208301	-0.05	-0.0725476	-0.0725476	-0.05	-0.0725476	-0.0684653	-0.05	0.547723	0.460977	-0.05	-0.108465	0.306786	-0.0912871	0.689202	-0.05	-0.0725476	-0.05	-0.0725476	-0.0886339	-0.05	1	-0.0684653	0.219089	0.547723	0.547723	-0.0912871	-0.101222	-0.0725476	1	0.145556	-0.05	-0.05	-0.141421	-0.0725476	-0.05	-0.108465	-0.0725476	0.403786	0.353553	-0.0725476	-0.0725476	-0.05
	PI	-0.160111	0.451222	-0.160111	0.152226	0.45177	0.465962	-0.160111	-0.0105597	-0.0105597	0.451222	-0.0105597	0.338827	-0.160111	0.0797241	-0.0157877	-0.160111	-0.181559	0.200945	-0.106299	0.432948	-0.160111	-0.0105597	-0.160111	0.211194	-0.0354782	-0.160111	0.145556	-0.219241	-0.191338	-0.106299	0.265747	0.45177	-0.0766139	0.211194	0.145556	1	-0.160111	-0.160111	-0.0205847	0.432948	-0.160111	0.315754	0.211194	0.387904	0.411693	-0.232314	-0.232314	-0.160111
	PIB	-0.05	-0.05	-0.05	0.104583	-0.0912871	-0.0219265	-0.05	0.689202	-0.0725476	-0.05	-0.0725476	-0.0684653	-0.05	-0.0912871	-0.108465	1	-0.108465	0.0383482	-0.0912871	-0.0725476	-0.05	-0.0725476	-0.05	-0.0725476	0.531804	-0.05	-0.05	-0.0684653	0.219089	-0.0912871	-0.0912871	-0.0912871	-0.101222	-0.0725476	-0.05	-0.160111	1	-0.05	0.353553	-0.0725476	-0.05	-0.108465	-0.0725476	-0.161515	-0.141421	-0.0725476	0.689202	-0.05
	PIP	-0.05	-0.05	-0.05	-0.209165	-0.0912871	0.208301	-0.05	-0.0725476	-0.0725476	-0.05	-0.0725476	-0.0684653	-0.05	-0.0912871	-0.108465	-0.05	-0.108465	0.0383482	-0.0912871	-0.0725476	-0.05	-0.0725476	-0.05	-0.0725476	-0.321298	-0.05	-0.05	-0.0684653	-0.164317	-0.0912871	-0.0912871	-0.0912871	-0.101222	-0.0725476	-0.05	-0.160111	-0.05	1	-0.141421	-0.0725476	-0.05	0.460977	-0.0725476	0.403786	0.353553	-0.0725476	-0.0725476	-0.05
	PLT	0.353553	-0.141421	-0.141421	0.147902	-0.258199	-0.387609	-0.141421	0.153897	-0.205196	-0.141421	-0.205196	0.484123	-0.141421	0.0430331	-0.306786	0.353553	-0.0383482	-0.271163	0.344265	0.153897	0.353553	-0.205196	0.353553	0.153897	0.517058	0.353553	-0.141421	0.258199	-0.10328	-0.258199	-0.258199	0.0430331	-0.286299	-0.205196	-0.141421	-0.0205847	0.353553	-0.141421	1	-0.205196	-0.141421	-0.0383482	0.153897	-0.190347	0.0666667	-0.205196	0.153897	-0.141421
	PMP	-0.0725476	-0.0725476	-0.0725476	0.379361	0.794719	0.302235	-0.0725476	0.447368	-0.105263	0.689202	-0.105263	-0.0993399	-0.0725476	-0.132453	-0.157378	-0.0725476	0.255739	0.250387	-0.132453	-0.105263	-0.0725476	-0.105263	-0.0725476	-0.105263	0.0964527	-0.0725476	-0.0725476	-0.0993399	-0.238416	-0.132453	-0.132453	0.331133	-0.146868	-0.105263	-0.0725476	0.432948	-0.0725476	-0.0725476	-0.205196	1	-0.0725476	0.255739	-0.105263	0.175762	0.153897	-0.105263	-0.105263	-0.0725476
	POM	-0.05	-0.05	-0.05	-0.209165	-0.0912871	0.208301	1	-0.0725476	-0.0725476	-0.05	-0.0725476	-0.0684653	1	-0.0912871	0.460977	-0.05	-0.108465	0.306786	-0.0912871	-0.0725476	-0.05	-0.0725476	-0.05	-0.0725476	-0.243743	-0.05	-0.05	-0.0684653	0.219089	-0.0912871	-0.0912871	-0.0912871	-0.101222	0.689202	-0.05	-0.160111	-0.05	-0.05	-0.141421	-0.0725476	1	-0.108465	-0.0725476	-0.161515	-0.141421	0.689202	-0.0725476	-0.05
	PP	0.460977	0.460977	-0.108465	0.226871	0.148522	0.202152	-0.108465	-0.157378	-0.157378	0.460977	-0.157378	-0.148522	-0.108465	-0.19803	-0.235294	-0.108465	-0.235294	0.22877	-0.19803	-0.157378	0.460977	-0.157378	-0.108465	-0.157378	-0.0660942	-0.108465	-0.108465	-0.148522	-0.356453	-0.19803	0.148522	0.148522	0.0109791	0.255739	-0.108465	0.315754	-0.108465	0.460977	-0.0383482	0.255739	-0.108465	1	0.668856	0.262781	0.498527	-0.157378	-0.157378	-0.108465
	PPO	0.689202	0.689202	-0.0725476	0.379361	-0.132453	-0.0318142	-0.0725476	-0.105263	-0.105263	-0.0725476	-0.105263	-0.0993399	-0.0725476	-0.132453	-0.157378	-0.0725476	-0.157378	-0.139104	-0.132453	-0.105263	0.689202	-0.105263	-0.0725476	-0.105263	0.208981	-0.0725476	-0.0725476	-0.0993399	-0.238416	-0.132453	0.331133	0.331133	0.161555	0.447368	-0.0725476	0.211194	-0.0725476	-0.0725476	0.153897	-0.105263	-0.0725476	0.668856	1	-0.23435	0.512989	-0.105263	-0.105263	-0.0725476
	PPS	-0.161515	-0.161515	-0.161515	-0.168916	0.393179	0.424973	-0.161515	-0.23435	-0.0292937	0.403786	0.380819	-0.0921512	-0.161515	0.0491473	0.262781	-0.161515	-0.197086	0.557442	-0.122868	0.380819	-0.161515	0.175762	-0.161515	-0.0292937	-0.348944	0.121136	0.403786	-0.221163	-0.0147442	0.0491473	0.0491473	-0.294884	-0.098093	-0.23435	0.403786	0.387904	-0.161515	0.403786	-0.190347	0.175762	-0.161515	0.262781	-0.23435	1	0.209381	-0.0292937	-0.23435	-0.161515
	PS	0.353553	0.353553	-0.141421	0.147902	0.344265	0.372104	-0.141421	0.153897	-0.205196	-0.141421	-0.205196	0.0322749	-0.141421	0.0430331	-0.0383482	-0.141421	-0.0383482	-0.14462	-0.258199	0.512989	0.353553	-0.205196	-0.141421	0.153897	0.0783421	-0.141421	0.353553	-0.193649	-0.284019	0.0430331	0.344265	0.344265	-0.0858898	0.153897	0.353553	0.411693	-0.141421	0.353553	0.0666667	0.153897	-0.141421	0.498527	0.512989	0.209381	1	-0.205196	-0.205196	-0.141421
	PSO	-0.0725476	-0.0725476	-0.0725476	-0.0758721	-0.132453	0.135211	0.689202	-0.105263	-0.105263	-0.0725476	0.447368	-0.0993399	0.689202	-0.132453	0.255739	-0.0725476	-0.157378	0.250387	-0.132453	-0.105263	-0.0725476	-0.105263	-0.0725476	-0.105263	-0.241132	-0.0725476	-0.0725476	-0.0993399	0.039736	-0.132453	-0.132453	-0.132453	0.469979	0.447368	-0.0725476	-0.232314	-0.0725476	-0.0725476	-0.205196	-0.105263	0.689202	-0.157378	-0.105263	-0.0292937	-0.205196	1	-0.105263	-0.0725476
	PTFE2	-0.0725476	-0.0725476	-0.0725476	-0.0758721	-0.132453	-0.198839	-0.0725476	0.447368	-0.105263	-0.0725476	-0.105263	-0.0993399	-0.0725476	-0.132453	-0.157378	0.689202	-0.157378	0.0556415	-0.132453	-0.105263	-0.0725476	-0.105263	-0.0725476	-0.105263	0.602829	-0.0725476	-0.0725476	-0.0993399	0.039736	-0.132453	-0.132453	-0.132453	-0.146868	-0.105263	-0.0725476	-0.232314	0.689202	-0.0725476	0.153897	-0.105263	-0.0725476	-0.157378	-0.105263	-0.23435	-0.205196	-0.105263	1	-0.0725476
	PUR	-0.05	-0.05	1	0.104583	-0.0912871	-0.252154	-0.05	-0.0725476	-0.0725476	-0.05	-0.0725476	-0.0684653	-0.05	-0.0912871	-0.108465	-0.05	-0.108465	-0.230089	-0.0912871	-0.0725476	-0.05	-0.0725476	-0.05	-0.0725476	0.0664754	-0.05	-0.05	-0.0684653	0.602495	0.547723	-0.0912871	-0.0912871	-0.101222	-0.0725476	-0.05	-0.160111	-0.05	-0.05	-0.141421	-0.0725476	-0.05	-0.108465	-0.0725476	-0.161515	-0.141421	-0.0725476	-0.0725476	1
	PVC	-0.10171	0.254274	-0.10171	-0.212741	-0.185695	0.423724	-0.10171	-0.147576	-0.147576	-0.10171	0.368939	-0.139272	-0.10171	0.247594	0.165479	-0.10171	0.358538	0.169017	0.464238	-0.147576	-0.10171	0.885454	-0.10171	0.368939	-0.206592	0.254274	-0.10171	0.185695	-0.0742781	-0.185695	0.0309492	0.0309492	-0.0617715	0.110682	-0.10171	0.0888264	-0.10171	-0.10171	-0.119866	-0.147576	-0.10171	-0.0275799	0.110682	0.150586	-0.119866	-0.147576	-0.147576	-0.10171
	PVDC	-0.05	-0.05	-0.05	0.104583	-0.0912871	-0.252154	-0.05	-0.0725476	-0.0725476	-0.05	-0.0725476	-0.0684653	-0.05	-0.0912871	-0.108465	-0.05	0.460977	0.306786	0.547723	-0.0725476	-0.05	-0.0725476	-0.05	-0.0725476	-0.0886339	1	-0.05	-0.0684653	-0.164317	-0.0912871	-0.0912871	-0.0912871	-0.101222	-0.0725476	-0.05	-0.160111	-0.05	-0.05	0.353553	-0.0725476	-0.05	-0.108465	-0.0725476	0.121136	-0.141421	-0.0725476	-0.0725476	-0.05
	PVDF	-0.0852803	-0.0852803	-0.0852803	-0.222971	-0.1557	-0.0373979	-0.0852803	-0.123738	-0.123738	-0.0852803	0.525885	0.291937	-0.0852803	0.116775	0.300623	-0.0852803	-0.184999	-0.0490552	0.116775	-0.123738	-0.0852803	0.525885	-0.0852803	-0.123738	0.14645	-0.0852803	-0.0852803	-0.116775	0.0467099	-0.1557	-0.1557	0.116775	-0.172645	-0.123738	-0.0852803	0.117924	-0.0852803	-0.0852803	-0.0301511	-0.123738	-0.0852803	-0.184999	-0.123738	0.20661	-0.241209	-0.123738	0.201074	-0.0852803
	RUBB	-0.130466	-0.130466	-0.130466	-0.136444	0.387069	-0.057213	0.212007	-0.189299	-0.189299	0.554479	-0.189299	0.446619	0.212007	0.387069	0.0884436	-0.130466	-0.28302	0.450282	0.178647	0.0591561	-0.130466	-0.189299	-0.130466	-0.189299	0.072273	-0.130466	0.212007	-0.178647	-0.178647	-0.0297746	-0.0297746	0.178647	-0.125457	0.0591561	0.212007	0.280103	-0.130466	-0.130466	-0.0461266	0.307612	0.212007	0.0884436	-0.189299	0.131701	-0.20757	0.0591561	0.0591561	-0.130466
	SB	-0.05	-0.05	-0.05	0.41833	-0.0912871	-0.0219265	-0.05	-0.0725476	0.689202	-0.05	-0.0725476	-0.0684653	-0.05	-0.0912871	-0.108465	-0.05	-0.108465	0.0383482	-0.0912871	-0.0725476	-0.05	-0.0725476	-0.05	-0.0725476	-0.0110792	-0.05	-0.05	-0.0684653	0.219089	-0.0912871	-0.0912871	-0.0912871	-0.101222	-0.0725476	-0.05	0.145556	-0.05	-0.05	-0.141421	-0.0725476	-0.05	-0.108465	-0.0725476	0.121136	-0.141421	-0.0725476	-0.0725476	-0.05
	SBS	-0.05	-0.05	-0.05	-0.209165	-0.0912871	0.208301	1	-0.0725476	-0.0725476	-0.05	-0.0725476	-0.0684653	1	-0.0912871	0.460977	-0.05	-0.108465	0.306786	-0.0912871	-0.0725476	-0.05	-0.0725476	-0.05	-0.0725476	-0.243743	-0.05	-0.05	-0.0684653	0.219089	-0.0912871	-0.0912871	-0.0912871	-0.101222	0.689202	-0.05	-0.160111	-0.05	-0.05	-0.141421	-0.0725476	1	-0.108465	-0.0725476	-0.161515	-0.141421	0.689202	-0.0725476	-0.05
	SI	-0.0852803	-0.0852803	0.362441	-0.222971	-0.1557	-0.233737	0.362441	-0.123738	-0.123738	-0.0852803	-0.123738	-0.116775	0.362441	-0.1557	0.0578122	-0.0852803	-0.184999	-0.163517	-0.1557	-0.123738	-0.0852803	-0.123738	0.810163	-0.123738	-0.151175	-0.0852803	-0.0852803	0.700649	0.537164	0.116775	-0.1557	-0.1557	-0.172645	0.201074	-0.0852803	-0.273087	-0.0852803	-0.0852803	0.180907	-0.123738	0.362441	-0.184999	-0.123738	-0.27548	-0.241209	0.201074	-0.123738	0.362441
	SMA	-0.05	-0.05	-0.05	0.104583	-0.0912871	-0.252154	-0.05	-0.0725476	-0.0725476	-0.05	-0.0725476	-0.0684653	-0.05	-0.0912871	0.460977	-0.05	0.460977	-0.230089	-0.0912871	-0.0725476	-0.05	-0.0725476	-0.05	-0.0725476	-0.243743	-0.05	-0.05	-0.0684653	0.219089	0.547723	-0.0912871	-0.0912871	-0.101222	-0.0725476	-0.05	-0.160111	-0.05	-0.05	-0.141421	-0.0725476	-0.05	-0.108465	-0.0725476	-0.161515	-0.141421	-0.0725476	-0.0725476	-0.05
	STR	-0.05	-0.05	-0.05	0.104583	-0.0912871	-0.252154	-0.05	-0.0725476	-0.0725476	-0.05	-0.0725476	0.890049	-0.05	0.547723	-0.108465	-0.05	-0.108465	-0.230089	0.547723	-0.0725476	-0.05	-0.0725476	-0.05	-0.0725476	0.221585	-0.05	-0.05	-0.0684653	-0.164317	-0.0912871	-0.0912871	0.547723	-0.101222	-0.0725476	-0.05	0.145556	-0.05	-0.05	0.353553	-0.0725476	-0.05	-0.108465	-0.0725476	-0.161515	-0.141421	-0.0725476	-0.0725476	-0.05
	WOIL	-0.05	-0.05	-0.05	0.41833	-0.0912871	-0.0219265	-0.05	-0.0725476	0.689202	-0.05	-0.0725476	-0.0684653	-0.05	-0.0912871	-0.108465	-0.05	-0.108465	0.0383482	-0.0912871	-0.0725476	-0.05	-0.0725476	-0.05	-0.0725476	-0.0110792	-0.05	-0.05	-0.0684653	0.219089	-0.0912871	-0.0912871	-0.0912871	-0.101222	-0.0725476	-0.05	0.145556	-0.05	-0.05	-0.141421	-0.0725476	-0.05	-0.108465	-0.0725476	0.121136	-0.141421	-0.0725476	-0.0725476	-0.05
		1	-0.05	-0.05	0.41833	-0.0912871	-0.252154	-0.05	-0.0725476	-0.0725476	-0.05	-0.0725476	-0.0684653	-0.05	-0.0912871	-0.108465	-0.05	-0.108465	-0.230089	-0.0912871	-0.0725476	1	-0.0725476	-0.05	-0.0725476	0.454249	-0.05	-0.05	-0.0684653	-0.164317	-0.0912871	-0.0912871	-0.0912871	-0.101222	-0.0725476	-0.05	-0.160111	-0.05	-0.05	0.353553	-0.0725476	-0.05	0.460977	0.689202	-0.161515	0.353553	-0.0725476	-0.0725476	-0.05
			1	-0.05	0.104583	-0.0912871	0.208301	-0.05	-0.0725476	-0.0725476	-0.05	-0.0725476	-0.0684653	-0.05	-0.0912871	-0.108465	-0.05	-0.108465	0.0383482	-0.0912871	-0.0725476	-0.05	-0.0725476	-0.05	-0.0725476	-0.166189	-0.05	-0.05	-0.0684653	-0.164317	-0.0912871	0.547723	0.547723	0.323911	0.689202	-0.05	0.451222	-0.05	-0.05	-0.141421	-0.0725476	-0.05	0.460977	0.689202	-0.161515	0.353553	-0.0725476	-0.0725476	-0.05
				1	0.104583	-0.0912871	-0.252154	-0.05	-0.0725476	-0.0725476	-0.05	-0.0725476	-0.0684653	-0.05	-0.0912871	-0.108465	-0.05	-0.108465	-0.230089	-0.0912871	-0.0725476	-0.05	-0.0725476	-0.05	-0.0725476	0.0664754	-0.05	-0.05	-0.0684653	0.602495	0.547723	-0.0912871	-0.0912871	-0.101222	-0.0725476	-0.05	-0.160111	-0.05	-0.05	-0.141421	-0.0725476	-0.05	-0.108465	-0.0725476	-0.161515	-0.141421	-0.0725476	-0.0725476	1
					1	0.190941	-0.229312	-0.209165	0.379361	0.151744	0.104583	-0.0758721	1.58603e-17	-0.209165	-0.190941	-0.283589	0.104583	0.226871	-0.160422	-3.70074e-17	-0.303488	0.41833	-0.303488	-0.209165	-0.303488	0.440304	0.104583	-0.209165	-0.286411	-3.17207e-17	-1.05736e-17	-0.190941	0.381881	-0.0423442	-0.0758721	-0.209165	0.152226	0.104583	-0.209165	0.147902	0.379361	-0.209165	0.226871	0.379361	-0.168916	0.147902	-0.0758721	-0.0758721	0.104583
						1	0.380304	-0.0912871	0.331133	-0.132453	0.547723	-0.132453	-0.125	-0.0912871	0.222222	0.148522	-0.0912871	0.148522	0.396746	-0.166667	0.331133	-0.0912871	-0.132453	-0.0912871	-0.132453	0.0269704	-0.0912871	0.547723	-0.125	-0.0666667	0.222222	0.222222	0.222222	-0.184805	-0.132453	0.547723	0.45177	-0.0912871	-0.0912871	-0.258199	0.794719	-0.0912871	0.148522	-0.132453	0.393179	0.344265	-0.132453	-0.132453	-0.0912871
							1	0.208301	0.135211	-0.0318142	0.208301	0.135211	-0.135108	0.208301	0.240192	0.202152	-0.0219265	0.0772934	0.36997	-0.040032	0.302235	-0.252154	0.46926	-0.252154	0.46926	-0.327953	-0.252154	0.208301	-0.030024	-0.156125	-0.180144	0.240192	0.10008	-0.0443888	0.302235	0.208301	0.465962	-0.0219265	0.208301	-0.387609	0.302235	0.208301	0.202152	-0.0318142	0.424973	0.372104	0.135211	-0.198839	-0.252154
								1	-0.0725476	-0.0725476	-0.05	-0.0725476	-0.0684653	1	-0.0912871	0.460977	-0.05	-0.108465	0.306786	-0.0912871	-0.0725476	-0.05	-0.0725476	-0.05	-0.0725476	-0.243743	-0.05	-0.05	-0.0684653	0.219089	-0.0912871	-0.0912871	-0.0912871	-0.101222	0.689202	-0.05	-0.160111	-0.05	-0.05	-0.141421	-0.0725476	1	-0.108465	-0.0725476	-0.161515	-0.141421	0.689202	-0.0725476	-0.05
									1	-0.105263	-0.0725476	-0.105263	-0.0993399	-0.0725476	-0.132453	-0.157378	0.689202	0.255739	-0.139104	-0.132453	-0.105263	-0.0725476	-0.105263	-0.0725476	-0.105263	0.546565	-0.0725476	-0.0725476	-0.0993399	0.039736	-0.132453	-0.132453	0.331133	-0.146868	-0.105263	-0.0725476	-0.0105597	0.689202	-0.0725476	0.153897	0.447368	-0.0725476	-0.157378	-0.105263	-0.23435	0.153897	-0.105263	0.447368	-0.0725476
										1	-0.0725476	-0.105263	-0.0993399	-0.0725476	-0.132453	-0.157378	-0.0725476	-0.157378	-0.139104	-0.132453	-0.105263	-0.0725476	-0.105263	-0.0725476	-0.105263	-0.184868	-0.0725476	-0.0725476	-0.0993399	0.039736	-0.132453	0.331133	-0.132453	0.161555	-0.105263	-0.0725476	-0.0105597	-0.0725476	-0.0725476	-0.205196	-0.105263	-0.0725476	-0.157378	-0.105263	-0.0292937	-0.205196	-0.105263	-0.105263	-0.0725476
											1	-0.0725476	-0.0684653	-0.05	-0.0912871	-0.108465	-0.05	-0.108465	0.575224	-0.0912871	-0.0725476	-0.05	-0.0725476	-0.05	-0.0725476	-0.0886339	-0.05	-0.05	-0.0684653	-0.164317	-0.0912871	-0.0912871	-0.0912871	-0.101222	-0.0725476	-0.05	0.451222	-0.05	-0.05	-0.141421	0.689202	-0.05	0.460977	-0.0725476	0.403786	-0.141421	-0.0725476	-0.0725476	-0.05
												1	-0.0993399	-0.0725476	-0.132453	0.255739	-0.0725476	-0.157378	0.0556415	-0.132453	-0.105263	-0.0725476	0.447368	-0.0725476	-0.105263	-0.128604	-0.0725476	-0.0725476	-0.0993399	0.039736	-0.132453	-0.132453	-0.132453	0.469979	-0.105263	-0.0725476	-0.0105597	-0.0725476	-0.0725476	-0.205196	-0.105263	-0.0725476	-0.157378	-0.105263	0.380819	-0.205196	0.447368	-0.105263	-0.0725476
													1	-0.0684653	0.458333	-0.148522	-0.0684653	-0.148522	-0.315063	0.458333	0.24835	-0.0684653	-0.0993399	-0.0684653	0.24835	0.23262	-0.0684653	-0.0684653	-0.09375	-0.225	-0.125	-0.125	0.458333	-0.138604	-0.0993399	-0.0684653	0.338827	-0.0684653	-0.0684653	0.484123	-0.0993399	-0.0684653	-0.148522	-0.0993399	-0.0921512	0.0322749	-0.0993399	-0.0993399	-0.0684653
														1	-0.0912871	0.460977	-0.05	-0.108465	0.306786	-0.0912871	-0.0725476	-0.05	-0.0725476	-0.05	-0.0725476	-0.243743	-0.05	-0.05	-0.0684653	0.219089	-0.0912871	-0.0912871	-0.0912871	-0.101222	0.689202	-0.05	-0.160111	-0.05	-0.05	-0.141421	-0.0725476	1	-0.108465	-0.0725476	-0.161515	-0.141421	0.689202	-0.0725476	-0.05
															1	0.148522	-0.0912871	0.148522	0.070014	0.611111	0.331133	-0.0912871	0.331133	-0.0912871	0.331133	0.0269704	-0.0912871	0.547723	0.166667	-0.0666667	0.222222	0.222222	0.222222	-0.184805	-0.132453	0.547723	0.0797241	-0.0912871	-0.0912871	0.0430331	-0.132453	-0.0912871	-0.19803	-0.132453	0.0491473	0.0430331	-0.132453	-0.132453	-0.0912871
																1	-0.108465	0.0735294	0.22877	-0.19803	0.255739	-0.108465	0.255739	-0.108465	-0.157378	-0.360514	-0.108465	0.460977	-0.148522	0.475271	0.495074	0.148522	-0.19803	-0.219581	0.255739	0.460977	-0.0157877	-0.108465	-0.108465	-0.306786	-0.157378	0.460977	-0.235294	-0.157378	0.262781	-0.0383482	0.255739	-0.157378	-0.108465
																	1	-0.108465	0.0383482	-0.0912871	-0.0725476	-0.05	-0.0725476	-0.05	-0.0725476	0.531804	-0.05	-0.05	-0.0684653	0.219089	-0.0912871	-0.0912871	-0.0912871	-0.101222	-0.0725476	-0.05	-0.160111	1	-0.05	0.353553	-0.0725476	-0.05	-0.108465	-0.0725476	-0.161515	-0.141421	-0.0725476	0.689202	-0.05
																		1	-0.0623918	0.495074	-0.157378	-0.108465	0.255739	-0.108465	0.255739	-0.108154	0.460977	-0.108465	0.111392	-0.148522	0.148522	-0.19803	0.148522	-0.219581	-0.157378	-0.108465	-0.181559	-0.108465	-0.108465	-0.0383482	0.255739	-0.108465	-0.235294	-0.157378	-0.197086	-0.0383482	-0.157378	-0.157378	-0.108465
																			1	0.070014	0.0556415	-0.230089	0.0556415	-0.230089	-0.139104	-0.269084	0.306786	0.306786	-0.192539	-0.070014	-0.093352	0.070014	-0.256718	-0.0310535	0.250387	0.306786	0.200945	0.0383482	0.0383482	-0.271163	0.250387	0.306786	0.22877	-0.139104	0.557442	-0.14462	0.250387	0.0556415	-0.230089
																				1	-0.132453	-0.0912871	0.331133	-0.0912871	0.331133	0.0269704	0.547723	-0.0912871	0.166667	-0.3	-0.166667	-0.166667	0.222222	-0.184805	-0.132453	-0.0912871	-0.106299	-0.0912871	-0.0912871	0.344265	-0.132453	-0.0912871	-0.19803	-0.132453	-0.122868	-0.258199	-0.132453	-0.132453	-0.0912871
																					1	-0.0725476	-0.105263	-0.0725476	0.447368	-0.0160755	-0.0725476	0.689202	-0.0993399	0.039736	0.331133	0.331133	-0.132453	-0.146868	-0.105263	0.689202	0.432948	-0.0725476	-0.0725476	0.153897	-0.105263	-0.0725476	-0.157378	-0.105263	0.380819	0.512989	-0.105263	-0.105263	-0.0725476
																						1	-0.0725476	-0.05	-0.0725476	0.454249	-0.05	-0.05	-0.0684653	-0.164317	-0.0912871	-0.0912871	-0.0912871	-0.101222	-0.0725476	-0.05	-0.160111	-0.05	-0.05	0.353553	-0.0725476	-0.05	0.460977	0.689202	-0.161515	0.353553	-0.0725476	-0.0725476	-0.05
																							1	-0.0725476	0.447368	-0.128604	-0.0725476	-0.0725476	0.24835	0.039736	-0.132453	-0.132453	-0.132453	-0.146868	-0.105263	-0.0725476	-0.0105597	-0.0725476	-0.0725476	-0.205196	-0.105263	-0.0725476	-0.157378	-0.105263	0.175762	-0.205196	-0.105263	-0.105263	-0.0725476
																								1	-0.0725476	-0.0886339	-0.05	-0.05	0.890049	0.219089	-0.0912871	-0.0912871	-0.0912871	-0.101222	-0.0725476	-0.05	-0.160111	-0.05	-0.05	0.353553	-0.0725476	-0.05	-0.108465	-0.0725476	-0.161515	-0.141421	-0.0725476	-0.0725476	-0.05
																									1	-0.0160755	-0.0725476	-0.0725476	0.24835	-0.238416	-0.132453	-0.132453	-0.132453	-0.146868	-0.105263	-0.0725476	0.211194	-0.0725476	-0.0725476	0.153897	-0.105263	-0.0725476	-0.157378	-0.105263	-0.0292937	0.153897	-0.105263	-0.105263	-0.0725476
																										1	-0.0886339	-0.0886339	-0.121367	-0.0364101	-0.161823	-0.303418	0.168565	-0.242236	-0.297396	-0.0886339	-0.0354782	0.531804	-0.321298	0.517058	0.0964527	-0.243743	-0.0660942	0.208981	-0.348944	0.0783421	-0.241132	0.602829	0.0664754
																											1	-0.05	-0.0684653	-0.164317	-0.0912871	-0.0912871	-0.0912871	-0.101222	-0.0725476	-0.05	-0.160111	-0.05	-0.05	0.353553	-0.0725476	-0.05	-0.108465	-0.0725476	0.121136	-0.141421	-0.0725476	-0.0725476	-0.05
																												1	-0.0684653	0.219089	0.547723	0.547723	-0.0912871	-0.101222	-0.0725476	1	0.145556	-0.05	-0.05	-0.141421	-0.0725476	-0.05	-0.108465	-0.0725476	0.403786	0.353553	-0.0725476	-0.0725476	-0.05
																													1	0.125	-0.125	-0.125	-0.125	-0.138604	-0.0993399	-0.0684653	-0.219241	-0.0684653	-0.0684653	0.258199	-0.0993399	-0.0684653	-0.148522	-0.0993399	-0.221163	-0.193649	-0.0993399	-0.0993399	-0.0684653
																														1	0.633333	-0.0666667	-0.3	-0.33265	0.039736	0.219089	-0.191338	0.219089	-0.164317	-0.10328	-0.238416	0.219089	-0.356453	-0.238416	-0.0147442	-0.284019	0.039736	0.039736	0.602495
																															1	0.222222	-0.166667	-0.184805	-0.132453	0.547723	-0.106299	-0.0912871	-0.0912871	-0.258199	-0.132453	-0.0912871	-0.19803	-0.132453	0.0491473	0.0430331	-0.132453	-0.132453	0.547723
																																1	0.222222	0.33265	0.331133	0.547723	0.265747	-0.0912871	-0.0912871	-0.258199	-0.132453	-0.0912871	0.148522	0.331133	0.0491473	0.344265	-0.132453	-0.132453	-0.0912871
																																	1	0.0739221	0.331133	-0.0912871	0.45177	-0.0912871	-0.0912871	0.0430331	0.331133	-0.0912871	0.148522	0.331133	-0.294884	0.344265	-0.132453	-0.132453	-0.0912871
																																		1	0.161555	-0.101222	-0.0766139	-0.101222	-0.101222	-0.286299	-0.146868	-0.101222	0.0109791	0.161555	-0.098093	-0.0858898	0.469979	-0.146868	-0.101222
																																			1	-0.0725476	0.211194	-0.0725476	-0.0725476	-0.205196	-0.105263	0.689202	0.255739	0.447368	-0.23435	0.153897	0.447368	-0.105263	-0.0725476
																																				1	0.145556	-0.05	-0.05	-0.141421	-0.0725476	-0.05	-0.108465	-0.0725476	0.403786	0.353553	-0.0725476	-0.0725476	-0.05
																																					1	-0.160111	-0.160111	-0.0205847	0.432948	-0.160111	0.315754	0.211194	0.387904	0.411693	-0.232314	-0.232314	-0.160111
																																						1	-0.05	0.353553	-0.0725476	-0.05	-0.108465	-0.0725476	-0.161515	-0.141421	-0.0725476	0.689202	-0.05
																																							1	-0.141421	-0.0725476	-0.05	0.460977	-0.0725476	0.403786	0.353553	-0.0725476	-0.0725476	-0.05
																																								1	-0.205196	-0.141421	-0.0383482	0.153897	-0.190347	0.0666667	-0.205196	0.153897	-0.141421
																																									1	-0.0725476	0.255739	-0.105263	0.175762	0.153897	-0.105263	-0.105263	-0.0725476
																																										1	-0.108465	-0.0725476	-0.161515	-0.141421	0.689202	-0.0725476	-0.05
																																											1	0.668856	0.262781	0.498527	-0.157378	-0.157378	-0.108465
																																												1	-0.23435	0.512989	-0.105263	-0.105263	-0.0725476
																																													1	0.209381	-0.0292937	-0.23435	-0.161515
																																														1	-0.205196	-0.205196	-0.141421
																																															1	-0.105263	-0.0725476
																																																1	-0.0725476
																																																	1

[truncated: 10 more columns]
