# Supplementary material
Source: Research Square preprint supplement (doi:10.21203/rs.3.rs-9512208/v1)
Supplement: Supplementary file 2 [file cfddae3017ec7be736feed5f.xlsx]

## Sheet: Master
total	278	Film	19	Fragment	187
		Fiber	71	Sphere	1
Sample	number	Type	Score	Maximum Hits	Library	Comment
DR042821HA32	1	Fiber	575	IRs Polymer2	PS	PolystyreneATR/diamond ATRcorrected
DR042821HA32	2	Fragment	581	ATR-Polymer2	D_Poly_alpha_Methylstyrene	Poly(alpha-Methylstyrene) DuraSamplIR-II
DR042821HA32	3	Fiber	569	IRs Polymer2	PI2	PolyimideFilm
DR042821HA32	4	Fiber	585	T-Polymer2	Epoxy	Epoxy Adhesives Transmission(Microscope)
DR042821HA32	5	Fragment	635	T-Polymer2	T_PhenoxyResin	Phenoxy Resin Transmission(Microscope)
DR042821HA32	6	Fragment	632	ATR-Polymer2	D_PC	Polycarbonate(PC) DuraSamplIR-II
DR042821HA32	7	Fragment	625	T-Polymer2	PC	Polycarbonate(PC) Transmission(Microscope)
DR042821HA32	8	Fiber	593	ATR-Polymer2	D_PI1	Polyimide(UPILEX) DuraSamplIR-II
DR042821HA32	9	Fragment	599	IRs Polymer2	RAMIE	Ramie FiberATR/diamond ATRcorrected
DR042821HA32	10	Fragment	698	ATR-Polymer2	D_PC	Polycarbonate(PC) DuraSamplIR-II
DR042821HA32	11	Fragment	603	ATR-Polymer2	D_PC-PBT	Polycarbonate/Polybutylene Terephthalate(PC/PBT) DuraSamplIR-II
DR042821HA32	12	Fragment	626	ATR-Polymer2	D_Epoxy5	Epoxy Resin DuraSamplIR-II
DR042821HA32	13	Fiber	598	IRs Polymer2	PB	PolybuteneATR/diamond ATRcorrected
DR042821HA32	14	Fragment	613	T-Polymer2	PC	Polycarbonate(PC) Transmission(Microscope)
DR042821HA32	15	Film	590	IRs Polymer2	PPS	PPSFilm
DR041120HE02	1	Fragment	659	T-Polymer2	T_PC2	Polycarbonate(PC) Transmission(Microscope)
DR041120HE02	2	Fragment	596	IRs Polymer2	PETG-20	POLYETHYLENE GLYCOLORIGIN Date: 92/04/09 File: PETG-20.DXINFRARED SPECTROPHOTOMETER FTIR-8000 SERIES
DR041120HE02	3	Fragment	606	ATR-Polymer2	D_1_2_Polybutadiene	1,2-Polybutadiene DuraSamplIR-II
DR041120HE02	4	Fragment	621	T-Polymer2	Silicon Grease	Silicon Grease Transmission(Microscope)
DR041120HE02	5	Fragment	635	T-Polymer2	PC	Polycarbonate(PC) Transmission(Microscope)
DR041120HE02	6	Fiber	576	ATR-Polymer2	D_Polyethyleneglycol	Polyethylene Glycol 20000 DuraSamplIR-II
DR041120HE02	7	Fragment	695	ATR-Polymer2	D_PC2	Polycarbonate(PC) DuraSamplIR-II
DR041120HE02	8	Fragment	708	ATR-Polymer2	D_PC	Polycarbonate(PC) DuraSamplIR-II
DR041120HE02	9	Fragment	644	T-Polymer2	PC	Polycarbonate(PC) Transmission(Microscope)
DR041120HE02	10	Fragment	575	IRs Polymer2	URETHAN	Polyurethane FormATR/ZnSe ATRcorrected
DR041120HE02	11	Fiber	577	ATR-Polymer2	D_ButylMethacrylate_IsobutylMethacrylate	Butyl Methacrylate/Isobutyl Methacrylate Copolymer(50:50) DuraSamplIR-II
DR041120HE02	12	Film	592	IRs Polymer2	PEI	Poly etherimideFilm
DR041120HG02	1	Fragment	598	ATR-Polymer2	D_PC2	Polycarbonate(PC) DuraSamplIR-II
DR041120HG02	2	Film	601	IRs Polymer2	PEEK	PEEKFilm
DR041120HG02	3	Sphere	589	T-Polymer2	Silicon Grease	Silicon Grease Transmission(Microscope)
DR041120HG02	4	Fiber	586	ATR-Polymer2	D_Poly_1_Butene	Poly(1-Butene), Isotactic DuraSamplIR-II
DR041120HG02	5	Fiber	590	IRs Polymer2	RAMIE	Ramie FiberATR/diamond ATRcorrected
DR041120HG02	6	Fiber	569	T-Polymer2	PEEK	Polyetheretherketone(PEEK) Transmission(Microscope)
DR041120HG02	7	Fragment	600	IRs Polymer2	PETG-20	POLYETHYLENE GLYCOLORIGIN Date: 92/04/09 File: PETG-20.DXINFRARED SPECTROPHOTOMETER FTIR-8000 SERIES
DR041120HG02	8	Fragment	605	IRs Polymer2	SILICO2	Silicone rubberATR/diamond ATRcorrected
DR041120HG02	9	Fragment	649	T-Polymer2	T_PC2	Polycarbonate(PC) Transmission(Microscope)
DR041120HG02	10	Fragment	619	T-Polymer2	T_PC2	Polycarbonate(PC) Transmission(Microscope)
DR041120HG06	1	Fiber	580	ATR-Polymer2	D_IR-cis	cis-Polyisoprene Rubber(IR-cis) DuraSamplIR-II
DR041120HG06	2	Duplicate
DR041120HG06	3	Fiber	586	IRs Polymer2	BUTYL_RB	Butyl rubber with salt(salt:1540,1016,876cm-1)ATR/diamond ATRcorrected
DR041120HG06	4	Fiber	584	ATR-Polymer2	D_PI3	Polyimide(Electronic Parts) DuraSamplIR-II
DR041120HG06	5	Fragment	696	T-Polymer2	PC	Polycarbonate(PC) Transmission(Microscope)
DR041120HG06	6	Fragment	590	T-Polymer2	PC	Polycarbonate(PC) Transmission(Microscope)
DR041120HG06	7	Fragment	644	ATR-Polymer2	D_PC	Polycarbonate(PC) DuraSamplIR-II
DR041120HG06	8	Fragment	582	ATR-Polymer2	D_Polyamide6	Polyamide(Nylon12) DuraSamplIR-II
DR041120HG06	9	Fragment	607	T-Polymer2	Polyacetylene	Polyacetylene Transmission(Microscope)
DR041120HG06	10	Fiber	596	ATR-Polymer2	D_PES	Polyethersulfone(PES) DuraSamplIR-II
DR041120HG06	11	Fiber	585	ATR-Polymer2	D_PVDF	Polyvinylindene Fluoride(PVDF) DuraSamplIR-II
DR041120HG06	12	Fragment	580	T-Polymer2	T_PhenoxyResin	Phenoxy Resin Transmission(Microscope)
DR041120HG06	13	Fragment	644	ATR-Polymer2	D_PC	Polycarbonate(PC) DuraSamplIR-II	Duplicte # 7
DR041120HG06	14	Fragment	582	T-Polymer2	Styrene-Ethylene-Butylene	Styrene-Ethylene-Butylene Transmission(Microscope)
DR041120HG06	15	Fragment	603	ATR-Polymer2	D_PC	Polycarbonate(PC) DuraSamplIR-II
DR041120HG06	16	Fragment	588	ATR-Polymer2	D_PC2	Polycarbonate(PC) DuraSamplIR-II
DR041120HG06	17	Fragment	601	T-Polymer2	T_PhenoxyResin	Phenoxy Resin Transmission(Microscope)
DR041120HG06	18	Fragment	647	T-Polymer2	PC	Polycarbonate(PC) Transmission(Microscope)
DR041120HG06	19	Fragment	592	T-Polymer2	PC	Polycarbonate(PC) Transmission(Microscope)
DR041120HG06	20	Fragment	663	IRs Polymer2	VLDPE	Low Density PolyethyleneFilm
DR041120HG06	21	Fragment	611	T-Polymer2	T_1_2_Polybutadiene	1,2-Polybutadiene Transmission(Microscope)
DR041120HJ03	1	Fiber	589	IRs Polymer2	BR3	Polybutadiene High-transFilm
DR041120HJ03	2	Fiber	591	ATR-Polymer2	D_Styrene_Maleic_Anhydride	Styrene/Maleic Anhydride Copolymer(50/50 Copolymer) DuraSamplIR-II
DR041120HJ03	3	Fragment	580	IRs Polymer2	NYLON6	Nylon 6 ATR/diamond ATRcorrected
DR041120HJ03	4	Fragment	582	IRs Polymer2	SanolLS770	Sanol LS770HINDERED AMINE LIGHT STABILIZERBIS(2,2,6,6-TETRAMETHYL-4-PIPERIDYL)SEBACATEC28H52N2O4CAS NO. 52829-07-9ATR/diamond ATRcorrected
DR041120HJ03	5	Film	591	IRs Polymer2	PEI	Poly etherimideFilm
DR041120HJ03	6	Fragment	645	ATR-Polymer2	D_PC	Polycarbonate(PC) DuraSamplIR-II
DR041120HJ03	7	Fragment	587	T-Polymer2	PEG	Polyethylene Glycol 20000 Transmission(Microscope)
DR041120HJ28	1	Fiber	570	T-Polymer2	T_HDPE	High Density Polyethylene(HDPE) Transmission(Microscope)
DR041120HJ28	2	Fiber	582	T-Polymer2	PC	Polycarbonate(PC) Transmission(Microscope)
DR041120HJ28	3	Fiber	572	IRs Polymer2	EPOXY1	Epoxy resin (liquid)ATR/diamond ATRcorrected
DR041120HJ28	4	Fiber	591	IRs Polymer2	P-EPQ	P-EPQANTIOXIDANT PHOSPHONITE COMPOUNDC68H92O4P2CAS NO. ATR/diamond ATRcorrected
DR041120HJ28	5	Film	599	T-Polymer2	Polyester	Polyester Film(TOYOBO ESTER FILM & ESPET FILM) Transmission(Microscope)
DR041120HM01	1	Fragment	628	ATR-Polymer2	D_PC	Polycarbonate(PC) DuraSamplIR-II
DR041120HM01	2	Fiber	579	T-Polymer2	Polyester	Polyester Film(TOYOBO ESTER FILM & ESPET FILM) Transmission(Microscope)
DR041120HM01	3	Fragment	626	ATR-Polymer2	D_PVC with PhenoricSulfonicEster	Polyvinylchloride with Phenolic ester of aliphatic sulfonic acid DuraSampllR
DR041120HM01	4	Fragment	591	ATR-Polymer2	D_Additive4	Polymer Additive(Irganox MD1024) DuraSamplIR-II
DR041120HM01	5	Fragment	595	IRs Polymer2	Chimassorb944LD	Chimassorb 944LDHINDERED AMINE LIGHT STABILIZER (POLYMERIC)CAS NO. 71878-19-8ATR/diamond ATRcorrected
DR041120HM01	6	Fragment	607	ATR-Polymer2	D_Polysulfone	Polysulfone DuraSamplIR-II
DR041120HM01	7	Fiber	594	T-Polymer2	T_1_2_Polybutadiene	1,2-Polybutadiene Transmission(Microscope)
DR041120HM01	8	Fragment	615	ATR-Polymer2	D_PPS2	Poly(Phenylene Sulfide) DuraSamplIR-II
DR041120HM01	9	Fragment	587	T-Polymer2	Epoxy7	Epoxy Resin Transmission(Microscope)
DR041120HM01	10	Fiber	588	ATR-Polymer2	D_Polyester4	Polyester Film(TOYOBO ESTER FILM & ESPET FILM) DuraSamplIR-II
DR041120HM01	11	Fragment	651	T-Polymer2	PC	Polycarbonate(PC) Transmission(Microscope)
DR041120HR01	1	Fiber	587	T-Polymer2	T_1_2_Polybutadiene	1,2-Polybutadiene Transmission(Microscope)
DR041120HR01	2	Fragment	621	IRs Polymer2	PC	Polycarbonate/CD-ROMATR/diamond ATRcorrected
DR041120HR01	3	Fiber	570	T-Polymer2	PS	Polystyrene(PS) Transmission(Microscope)
DR041120HR01	4	Fragment	632	T-Polymer2	PC	Polycarbonate(PC) Transmission(Microscope)
DR041120HR01	5	Fragment	729	T-Polymer2	PC	Polycarbonate(PC) Transmission(Microscope)
DR041120HR01	6	Fiber	591	ATR-Polymer2	D_PolyethyleneOxide	Poly(Ethylene Oxide) DuraSamplIR-II
DR041120HR01	7	Fragment	703	T-Polymer2	PC	Polycarbonate(PC) Transmission(Microscope)
DR041120HR01	8	Fiber	656	T-Polymer2	T_PC2	Polycarbonate(PC) Transmission(Microscope)
DR041120HR01	9	Fragment	666	T-Polymer2	PC	Polycarbonate(PC) Transmission(Microscope)
DR041120HR01	10	Fragment	603	ATR-Polymer2	D_PC	Polycarbonate(PC) DuraSamplIR-II
DR041120HR01	11	Fragment	615	T-Polymer2	T_PC2	Polycarbonate(PC) Transmission(Microscope)
DR041120HR01	12	Fragment	647	ATR-Polymer2	D_PC	Polycarbonate(PC) DuraSamplIR-II
DR041120HR01	13	Fragment	658	T-Polymer2	Paper	Paper Transmission(Microscope)
DR041120HR01	14	Fragment	618	T-Polymer2	PC	Polycarbonate(PC) Transmission(Microscope)
DR041120HR01	15	Fragment	602	ATR-Polymer2	D_Cellulose5	Ramie DuraSamplIR-II
DR041120HR01	16	Fiber	583	ATR-Polymer2	D_PPS2	Poly(Phenylene Sulfide) DuraSamplIR-II
DR041120HR01	17	Fiber	578	T-Polymer2	Acrylic Adhesive	Acrylic Adhesive Transmission(Microscope)
DR041120HR01	18	Fiber	593	IRs Polymer2	BR3	Polybutadiene High-transFilm
DR041120HR01	19	Fiber	589	T-Polymer2	PP	Polypropylene(PP) Transmission(Microscope)
DR041120HT03	1	Fragment	768	T-Polymer2	Soy Bean Powder	Protein(Soy Bean Powder) Transmission(Microscope)
DR041120HT03	2	Fragment	618	T-Polymer2	PPS	Polyphenylene Sulfie(PPS) Transmission(Microscope)
DR041120HT03	3	Fragment	588	T-Polymer2	Irganox 1330	Polymer Additive(Irganox 1330) Transmission(Microscope)
DR041120HT03	4	Fragment	641	T-Polymer2	Polyacetylene	Polyacetylene Transmission(Microscope)
DR041120HT03	5	Fragment	595	ATR-Polymer2	D_PVC with TerephthalicEster	Polyvinylchloride with BIS(2-Ehylhexyl)Terephthalate DuraSampllR
DR041120HT03	6	Fragment	657	IRs Polymer2	PC	Polycarbonate/CD-ROMATR/diamond ATRcorrected
DR041120HT03	7	Fragment	656	IRs Polymer2	NY-MXD6	Nylon MXD6Film
DR041120HT03	8	Fiber	580	ATR-Polymer2	D_Polycaprolactone	Polycaprolactone DuraSamplIR-II
DR041120HT03	9	Fragment	638	T-Polymer2	PC	Polycarbonate(PC) Transmission(Microscope)
DR041120HT03	10	Fragment	645	ATR-Polymer2	D_PC	Polycarbonate(PC) DuraSamplIR-II
DR041120HT03	11	Fiber	569	T-Polymer2	High-trans Polybutadiene	High-trans Butadiene Rubber(High-trans Polybutadiene) Transmission(Microscope)
DR041120HT03	12	Fiber	579	IRs Polymer2	Irganox1010	Irganox1010ANTIOXIDANT(Phenol)C73H108O12CAS NO. 6683-19-8ATR/diamond ATRcorrected
DR041120HT03	13	Fragment	595	IRs Polymer2	PVDC	PVDC,Poly (vinylidene chloride) /wlap filmATR/diamond ATRcorrected
UV042821HA04	1	Fragment	593	T-Polymer2	Epoxy	Epoxy Resin Transmission(Microscope)
UV042821HA04	2	Duplicate
UV042821HA04	3	Fiber	578	ATR-Polymer2	D_PTFE2	Poly(Tetrafluoroethylene) DuraSamplIR-II
UV042821HA04	4	Fragment	606	ATR-Polymer2	D_Polybuten	Polybuten DuraSamplIR-II
UV042821HA04	5	Fragment	573	ATR-Polymer2	D_Additive1	Polymer Additive(Irganox 1010) DuraSamplIR-II
UV042821HA04	6	Fragment	664	T-Polymer2	PC	Polycarbonate(PC) Transmission(Microscope)
UV042821HA04	7	Fragment	702	ATR-Polymer2	D_PC	Polycarbonate(PC) DuraSamplIR-II
UV042821HA04	8	Fragment	664	IRs Polymer2	PC	Polycarbonate/CD-ROMATR/diamond ATRcorrected
UV042821HA04	9	Fragment	660	T-Polymer2	PC	Polycarbonate(PC) Transmission(Microscope)
UV042821HA04	10	Fragment	619	IRs Polymer2	MELAMIN	Melamin FormATR/diamond ATRcorrected
UV042821HA04	11	Fragment	642	T-Polymer2	PC	Polycarbonate(PC) Transmission(Microscope)
UV042821HA04	12	Fragment	637	T-Polymer2	PC	Polycarbonate(PC) Transmission(Microscope)
UV042821HA04	13	Fragment	629	T-Polymer2	PC	Polycarbonate(PC) Transmission(Microscope)
UV042821HA04	14	Fragment	641	ATR-Polymer2	D_PC	Polycarbonate(PC) DuraSamplIR-II
UV042821HA04	15	Fragment	652	T-Polymer2	Ramie	Ramie Transmission(Microscope)
UV042821HA04	16	Fiber	584	ATR-Polymer2	D_Polyethyleneglycol	Polyethylene Glycol 20000 DuraSamplIR-II
UV042821HA04	17	Fragment	677	ATR-Polymer2	D_PC	Polycarbonate(PC) DuraSamplIR-II
UV042821HA04	18	Fragment	654	T-Polymer2	PC	Polycarbonate(PC) Transmission(Microscope)
UV042821HA04	19	Fragment	637	T-Polymer2	PC	Polycarbonate(PC) Transmission(Microscope)
UV042821HA04	20	Fragment	634	T-Polymer2	FEP	Tetrafluoroethylene-Hexafluoropropylene(FEP) Transmission(Microscope)
UV042821HA04	21	Fiber	581	ATR-Polymer2	D_1_2_Polybutadiene	1,2-Polybutadiene DuraSamplIR-II
UV042821HA05	1	Fiber	607	ATR-Polymer2	D_PPS	Polyphenylene Sulfide(PPS) DuraSamplIR-II
UV042821HA05	2	Fiber	579	T-Polymer2	PPS	Polyphenylene Sulfie(PPS) Transmission(Microscope)
UV042821HA05	3	Fiber	590	IRs Polymer2	DLTDP	DLTDPANTIOXIDANT (CONTAINING SULFUR)DILAURYL THIODIPROPIONATEC30H58O4SCAS NO. 123-28-4ATR/diamond ATRcorrected
UV042821HA05	4	Fiber	575	ATR-Polymer2	D_Polyethyleneglycol	Polyethylene Glycol 20000 DuraSamplIR-II
UV042821HA05	5	Fiber	577	IRs Polymer2	BUTYL_RB	Butyl rubber with salt(salt:1540,1016,876cm-1)ATR/diamond ATRcorrected
UV042821HA05	6	Fiber	580	T-Polymer2	Epoxy	Epoxy Resin(Electronic Parts-3) Transmission(Microscope)
UV042821HA05	7	Fiber	580	T-Polymer2	T_Polydiallyl_Isophthalate	Poly(Diallyl Isophthalate) Transmission(Microscope)
UV042821HA05	8	Film	586	IRs Polymer2	LLDPE1	Low Density PolyethyleneFilm
UV042821HA05	9	Fragment	609	IRs Polymer2	P-EPQ	P-EPQANTIOXIDANT PHOSPHONITE COMPOUNDC68H92O4P2CAS NO. ATR/diamond ATRcorrected
UV042821HA05	10	Duplicate
UV042821HA05	11	Fiber	588	ATR-Polymer2	D_PC-PBT	Polycarbonate/Polybutylene Terephthalate(PC/PBT) DuraSamplIR-II
UV042821HA05	12	Fiber	592	T-Polymer2	PI	Polyimide(Electronic Parts) Transmission(Microscope)
UV042821HA05	13	Fiber	598	ATR-Polymer2	D_Additive3	Polymer Additive(Irganox 1330) DuraSamplIR-II
UV042821HA05	14	Fiber	579	ATR-Polymer2	D_Additive6	Polymer Additive(Sanol LS770) DuraSamplIR-II
UV042821HA05	15	Fiber	582	ATR-Polymer2	D_PPS	Polyphenylene Sulfide(PPS) DuraSamplIR-II
UV042821HA05	16	Fiber	575	IRs Polymer2	PS	PolystyreneATR/diamond ATRcorrected
UV042821HA05	17	Fiber	590	IRs Polymer2	DLTDP	DLTDPANTIOXIDANT (CONTAINING SULFUR)DILAURYL THIODIPROPIONATEC30H58O4SCAS NO. 123-28-4ATR/diamond ATRcorrected
UV042821HA05	18	Fragment	587	ATR-Polymer2	D_Additive4	Polymer Additive(Irganox MD1024) DuraSamplIR-II
UV042821HA05	19	Fragment	667	T-Polymer2	PC	Polycarbonate(PC) Transmission(Microscope)
UV042821HA05	20	Fiber	605	ATR-Polymer2	D_PEI	Polyetherimide(PEI) DuraSamplIR-II
UV042821HA05	21	Fragment	582	IRs Polymer2	PHSI	Phenylsilicone rubberATR/diamond ATRcorrected
UV042821HA05	22	Fragment	718	ATR-Polymer2	D_PC	Polycarbonate(PC) DuraSamplIR-II
UV042821HA05	23	Fiber	596	ATR-Polymer2	D_Poly_alpha_Methylstyrene	Poly(alpha-Methylstyrene) DuraSamplIR-II
UV042821HA05	24	Fragment	588	ATR-Polymer2	D_Epoxy6	Epoxy Adhesives DuraSamplIR-II
UV042821HA11	1	Film	571	IRs Polymer2	PP	PolypropyleneFilm
UV042821HA11	2	Fragment	586	ATR-Polymer2	D_Additive2	Polymer Additive(Irganox 1076) DuraSamplIR-II
UV042821HA11	3	Fragment	632	ATR-Polymer2	D_PPS2	Poly(Phenylene Sulfide) DuraSamplIR-II
UV042821HA11	4	Fiber	576	IRs Polymer2	PS	PolystyreneATR/diamond ATRcorrected
UV042821HA11	5	Fragment	612	ATR-Polymer2	D_Epoxy1	Epoxy Resin(Electronic Parts-1) DuraSamplIR-II
UV042821HA11	6	Fragment	581	IRs Polymer2	PIP	Polyisoprene [-CH2CH(CH3)=CHCH2-]nFilm
UV042821HA11	7	Film	590	IRs Polymer2	PPS	PPSFilm
UV042821HA11	8	Fragment	602	T-Polymer2	Epoxy7	Epoxy Resin Transmission(Microscope)
UV042821HA12	1	Fiber	579	T-Polymer2	T_PVC with PhenoricSulfonicEster	Polyvinylchloride with Phenolic ester of aliphatic sulfonic acid Transmission(Microscope)
UV042821HA12	2	Fragment	598	T-Polymer2	PPS	Polyphenylene Sulfie(PPS) Transmission(Microscope)
UV042821HA12	3	Fragment	581	T-Polymer2	Epoxy	Epoxy Adhesives Transmission(Microscope)
UV042821HA12	4	Fragment	592	ATR-Polymer2	D_PVDF	Polyvinylindene Fluoride(PVDF) DuraSamplIR-II
UV042821HA12	5	Fragment	613	ATR-Polymer2	D_Additive7	Polymer Additive(Chimassorb 944LD) DuraSamplIR-II
UV042821HA12	6	Fragment	581	T-Polymer2	PAR	Polyarylate(PAR) Transmission(Microscope)
UV042821HA12	7	Fragment	608	ATR-Polymer2	D_PVC with PhthalicEster 1	Polyvinylchloride with Phthalate DuraSampllR
UV042821HA12	8	Fragment	595	T-Polymer2	Irganox 1330	Polymer Additive(Irganox 1330) Transmission(Microscope)
UV042821HA12	9	Fragment	682	ATR-Polymer2	D_PC	Polycarbonate(PC) DuraSamplIR-II
UV042821HA12	10	Fragment	600	ATR-Polymer2	D_Additive6	Polymer Additive(Sanol LS770) DuraSamplIR-II
UV042821HA12	11	Fragment	592	ATR-Polymer2	D_PI1	Polyimide(UPILEX) DuraSamplIR-II
UV042821HA12	12	Fragment	599	T-Polymer2	Epoxy	Epoxy Adhesives Transmission(Microscope)
UV042821HA12	13	Fragment	600	ATR-Polymer2	D_Polyethyleneglycol	Polyethylene Glycol 20000 DuraSamplIR-II
UV042821HA12	14	Fragment	583	T-Polymer2	PVDF	Polyvinylidene Fluoride(PVDF) Transmission(Microscope)
UV042821HA12	15	Fragment	636	ATR-Polymer2	D_PC	Polycarbonate(PC) DuraSamplIR-II
UV042821HA12	16	Fragment	669	T-Polymer2	PC	Polycarbonate(PC) Transmission(Microscope)
UV042821HA12	17	Film	599	IRs Polymer2	PPS	PPSFilm
UV042821HA22	1	Fragment	603	T-Polymer2	Epoxy	Epoxy Resin(Electronic Parts-1) Transmission(Microscope)
UV042821HA22	2	Fragment	614	ATR-Polymer2	D_PC-PBT	Polycarbonate/Polybutylene Terephthalate(PC/PBT) DuraSamplIR-II
UV042821HA22	3	Fragment	690	ATR-Polymer2	D_PC	Polycarbonate(PC) DuraSamplIR-II
UV042821HA22	4	Fragment	599	T-Polymer2	T_HDPE	High Density Polyethylene(HDPE) Transmission(Microscope)
UV042821HA22	5	Film	606	IRs Polymer2	PPS	PPSFilm
UV042821HA22	6	Fiber	589	ATR-Polymer2	D_PolyethyleneOxide	Poly(Ethylene Oxide) DuraSamplIR-II
UV042821HA22	7	Film	692	IRs Polymer2	LANOLINE	LanolineFilm
UV042821HA22	8	Fragment	624	T-Polymer2	PC	Polycarbonate(PC) Transmission(Microscope)
UV042821HA22	9	Fragment	619	ATR-Polymer2	D_PC	Polycarbonate(PC) DuraSamplIR-II
UV042821HA22	10	Fragment	606	T-Polymer2	Irganox 1076	Polymer Additive(Irganox 1076) Transmission(Microscope)
UV042821HA22	11	Fiber	603	ATR-Polymer2	D_Ht-BR	High-trans Butadiene Rubber(High-trans Polubutadiene) DuraSamplIR-II
UV042821HA22	12	Fiber	589	ATR-Polymer2	D_SB	Styrene/Butadiene(SB) SBS Block Copolymer(Styrene content 30%) DuraSamplIR-II
UV042821HA22	13	Fiber	570	ATR-Polymer2	D_PI3	Polyimide(Electronic Parts) DuraSamplIR-II
UV042821HA22	14	Fragment	589	ATR-Polymer2	D_Ht-BR	High-trans Butadiene Rubber(High-trans Polubutadiene) DuraSamplIR-II
UV042821HA31	1	Fiber	578	ATR-Polymer2	D_PI2	Polyimide(KAPTON) DuraSamplIR-II
UV042821HA31	2	Fragment	640	T-Polymer2	PC	Polycarbonate(PC) Transmission(Microscope)
UV042821HA31	3	Fragment	587	ATR-Polymer2	D_Poly_4_Methyl_1_Pentene	Poly(4-Methyl-1 Pentene) DuraSamplIR-II
UV042821HA31	4	Fragment	605	T-Polymer2	PPS	Polyphenylene Sulfie(PPS) Transmission(Microscope)
UV042821HA31	5	Film	582	IRs Polymer2	PP	PolypropyleneFilm
UV042821HA31	6	Fiber	583	ATR-Polymer2	D_Additive1	Polymer Additive(Irganox 1010) DuraSamplIR-II
UV042821HA31	7	Fragment	628	ATR-Polymer2	D_Epoxy1	Epoxy Resin(Electronic Parts-1) DuraSamplIR-II
UV042821HA31	8	Fiber	576	T-Polymer2	PPS	Polyphenylene Sulfie(PPS) Transmission(Microscope)
UV042821HA31	9	Fragment	601	ATR-Polymer2	D_PI2	Polyimide(KAPTON) DuraSamplIR-II
UV042821HA31	10	Fragment	578	T-Polymer2	IR-trans	trans-Polyisoprene Rubber(IR-trans) Transmission(Microscope)
UV042821HA31	11	Fragment	595	IRs Polymer2	IrganoxMD1024	Irganox MD1024 HINDERED PHENOLIC ANTIOXIDANT-METAL DEACTIVATOR1,2-BIS(3,5-DI-tert-BUTYL-4-HYDROXYHYDROCINNAMOYL)HYDRAZINE; HINDERED PHENOLC34H52O4N2CAS NO. 32687-78-8ATR/diamond ATRcorrected
UV042821HA31	12	Fragment	629	T-Polymer2	PC	Polycarbonate(PC) Transmission(Microscope)
UV042821HA31	13	Fragment	597	IRs Polymer2	DLTDP	DLTDPANTIOXIDANT (CONTAINING SULFUR)DILAURYL THIODIPROPIONATEC30H58O4SCAS NO. 123-28-4ATR/diamond ATRcorrected
UV042821HA31	14	Fragment	588	ATR-Polymer2	D_Additive3	Polymer Additive(Irganox 1330) DuraSamplIR-II
UV042821HA31	15	Fragment	590	IRs Polymer2	PC	Polycarbonate/CD-ROMATR/diamond ATRcorrected
UV042821HA31	16	Fragment	600	T-Polymer2	Epoxy7	Epoxy Resin Transmission(Microscope)
UV042821HA31	17	Fragment	598	T-Polymer2	T_1_2_Polybutadiene	1,2-Polybutadiene Transmission(Microscope)
UV042821HA31	18	Fragment	606	ATR-Polymer2	D_Polyisoprene_Chlorinated	Polyisoprene, Chlorinated(Chlorine content 65%) DuraSamplIR-II
UV042821HA31	19	Fragment	602	T-Polymer2	T_PhenoxyResin	Phenoxy Resin Transmission(Microscope)
UV042821HA34	1	Fragment	600	ATR-Polymer2	D_Additive3	Polymer Additive(Irganox 1330) DuraSamplIR-II
UV042821HA34	2	Fragment	613	ATR-Polymer2	D_Epoxy7	Epoxy Resin DuraSamplIR-II
UV042821HA34	3	Fiber	564	ATR-Polymer2	D_Additive6	Polymer Additive(Sanol LS770) DuraSamplIR-II
UV042821HA34	4	Fragment	597	ATR-Polymer2	D_POM2	Polyacetal(Electronic Parts-2) DuraSamplIR-II
UV042821HA34	5	Fragment	694	ATR-Polymer2	D_PC	Polycarbonate(PC) DuraSamplIR-II
UV042821HA34	6	Film	608	IRs Polymer2	SBS	SBSFilm
UV042821HA34	7	Fiber	572	T-Polymer2	Silicon Grease	Silicon Grease Transmission(Microscope)
UV042821HA34	8	Fiber	592	IRs Polymer2	PETG-20	POLYETHYLENE GLYCOLORIGIN Date: 92/04/09 File: PETG-20.DXINFRARED SPECTROPHOTOMETER FTIR-8000 SERIES
UV042821HA34	9	Fragment	591	T-Polymer2	Epoxy	Epoxy Resin(Electronic Parts-2) Transmission(Microscope)
UV042821HA34	10	Fragment	587	ATR-Polymer2	D_IIR	IIR(Isobutylene-Isoprene Rubber) DuraSamplIR-II
UV042821HA34	11	Fragment	586	ATR-Polymer2	D_Polysulfone	Polysulfone DuraSamplIR-II
UV042821HA34	12	Fragment	606	ATR-Polymer2	D_IR-trans	trans-Polyisoprene Rubber(IR-trans) DuraSamplIR-II
UV042821HA34	13	Fragment	581	IRs Polymer2	PETG	Polyethylene glycolORIGIN Date: 92/03/27 File: PETG.DXINFRARED SPECTROPHOTOMETER FTIR-8000 SERIES
UV042821HA34	14	Fragment	590	T-Polymer2	T_EVA-6	Ethylene/Vinyl Acetate(EVA) Copolymer(Vinyl Acetate content 40%) Transmission(Microscope)
UV042821HA34	15	Fiber	577	IRs Polymer2	Irganox1330	Irganox 1330 ANTIOXIDANT (Penol)C54H78O31,3,5-TRIMETHYL-2,4,6-TRIS(3,5-DI-tert-BUTYL-4-HYDROXYBENZYL)BENZENECAS NO. 1709-70-2ATR/diamond ATRcorrected
UV042821HA46	1	Fiber	584	IRs Polymer2	PVDC	PVDC,Poly (vinylidene chloride) /wlap filmATR/diamond ATRcorrected
UV042821HA46	2	Film	566	IRs Polymer2	PES	PESFilm
UV042821HA46	3	Fragment	585	ATR-Polymer2	D_PP_Chlorinated	Polypropylene, Chlorinated(Chlorine content 65%) DuraSamplIR-II
UV042821HA46	4	Fragment	580	IRs Polymer2	P-EPQ	P-EPQANTIOXIDANT PHOSPHONITE COMPOUNDC68H92O4P2CAS NO. ATR/diamond ATRcorrected
UV042821HA46	5	Fragment	591	ATR-Polymer2	D_PPO-PA	Polyphenylene Oxide(Polyphenylene Ether)/Polyamide(PPO/PA NORYL) DuraSamplIR-II
UV042821HA46	6	Fragment	604	T-Polymer2	Irganox MD1024	Polymer Additive(Irganox MD1024) Transmission(Microscope)
UV042821HA46	7	Fragment	581	ATR-Polymer2	D_PI4	Polyimide DuraSamplIR-II
UV042821HA46	8	Fragment	606	IRs Polymer2	PETG	Polyethylene glycolORIGIN Date: 92/03/27 File: PETG.DXINFRARED SPECTROPHOTOMETER FTIR-8000 SERIES
UV042821HA46	9	Film	600	IRs Polymer2	PS1	PolystyreneFilm
UV042821HA46	10	Fragment	602	ATR-Polymer2	D_PI1	Polyimide(UPILEX) DuraSamplIR-II
UV042821HA46	11	Fragment	598	ATR-Polymer2	D_Hc-BR2	High-cis Butadiene Rubber(High-cis Polybutadiene) DuraSamplIR-II
UV042821HA46	12	Fragment	595	T-Polymer2	Epoxy	Epoxy Resin(Electronic Parts-3) Transmission(Microscope)
UV042821HA46	13	Fragment	616	ATR-Polymer2	D_PC	Polycarbonate(PC) DuraSamplIR-II
UV042821HA46	14	Fragment	593	ATR-Polymer2	D_Aramid	Aramid Fiber DuraSamplIR-II
UV042821HA46	15	Fragment	669	T-Polymer2	PC	Polycarbonate(PC) Transmission(Microscope)
UV042821HA46	16	Film	580	ATR-Polymer2	D_Polyester2	Polyester Film(TAIKO-FE) DuraSamplIR-II
UV042821HA46	17	Fragment	591	T-Polymer2	Epoxy	Epoxy Adhesives Transmission(Microscope)
UV042821HA48	1	Fragment	595	T-Polymer2	Epoxy	Epoxy Resin(Electronic Parts-3) Transmission(Microscope)
UV042821HA48	2	Fragment	628	T-Polymer2	Epoxy	Epoxy Resin Transmission(Microscope)
UV042821HA48	3	Fragment	585	IRs Polymer2	IrganoxMD1024	Irganox MD1024 HINDERED PHENOLIC ANTIOXIDANT-METAL DEACTIVATOR1,2-BIS(3,5-DI-tert-BUTYL-4-HYDROXYHYDROCINNAMOYL)HYDRAZINE; HINDERED PHENOLC34H52O4N2CAS NO. 32687-78-8ATR/diamond ATRcorrected
UV042821HA48	4	Fragment	605	ATR-Polymer2	D_PC	Polycarbonate(PC) DuraSamplIR-II
UV042821HA48	5	Fragment	591	ATR-Polymer2	D_PVC_Carboxylated	Poly(Vinyl Chloride)(PVC), Carboxylated(Carboxyl content 1.8%) DuraSamplIR-II
UV042821HA48	6	Film	687	IRs Polymer2	NYLON11	Nylon 11 [-NH(CH2)10CO-]nFilm
UV042821HA48	7	Fragment	617	T-Polymer2	T_PVC with PhenoricSulfonicEster	Polyvinylchloride with Phenolic ester of aliphatic sulfonic acid Transmission(Microscope)
UV042821HA48	8	Fragment	593	T-Polymer2	PC	Polycarbonate(PC) Transmission(Microscope)
UV042821HA48	9	Fiber	570	ATR-Polymer2	D_PEEK	Polyetheretherketone(PEEK) DuraSamplIR-II
UV042821HA48	10	Film	787	IRs Polymer2	LDPE	Low Density PolyethyleneFilm
UV042821HA48	11	Fragment	603	T-Polymer2	PAR	Polyarylate(PAR) Transmission(Microscope)
UV042821HA48	12	Fragment	599	T-Polymer2	Epoxy	Epoxy Resin Transmission(Microscope)
UV042821HA48	13	Fragment	617	ATR-Polymer2	D_PC	Polycarbonate(PC) DuraSamplIR-II
UV042821HA48	14	Fragment	681	T-Polymer2	Polyacetylene	Polyacetylene Transmission(Microscope)
UV042821HA48	15	Fragment	577	T-Polymer2	PBT	Polybutylene Terephthalate(PBT) Transmission(Microscope)
UV042821HA52	1	Fragment	640	T-Polymer2	PC	Polycarbonate(PC) Transmission(Microscope)
UV042821HA52	2	Fragment	590	IRs Polymer2	FEP	FEP,Tetrafluoroethylene HexafluoropropyleneATR/diamond ATRcorrected
UV042821HA52	3	Fragment	710	T-Polymer2	PC	Polycarbonate(PC) Transmission(Microscope)
UV042821HA52	4	Fragment	637	ATR-Polymer2	D_Epoxy5	Epoxy Resin DuraSamplIR-II
UV042821HA52	5	Fragment	590	IRs Polymer2	PI1	Polyimide KAPTONFilm
UV042821HA52	6	Fragment	596	ATR-Polymer2	D_Poly_4_Methyl_1_Pentene	Poly(4-Methyl-1 Pentene) DuraSamplIR-II
UV042821HA52	7	Fragment	589	T-Polymer2	PC	Polycarbonate(PC) Transmission(Microscope)
UV042821HA52	8	Fragment	594	T-Polymer2	T_PC2	Polycarbonate(PC) Transmission(Microscope)
UV042821HA52	9	Fragment	589	IRs Polymer2	PS	PolystyreneATR/diamond ATRcorrected
UV042821HA52	10	Fragment	622	T-Polymer2	PC	Polycarbonate(PC) Transmission(Microscope)
UV042821HA52	11	Fiber	590	T-Polymer2	High-trans Polybutadiene	High-trans Butadiene Rubber(High-trans Polybutadiene) Transmission(Microscope)
UV042821HA52	12	Fragment	596	T-Polymer2	T_1_2_Polybutadiene	1,2-Polybutadiene Transmission(Microscope)
UV042821HA52	13	Fragment	593	IRs Polymer2	DLTDP	DLTDPANTIOXIDANT (CONTAINING SULFUR)DILAURYL THIODIPROPIONATEC30H58O4SCAS NO. 123-28-4ATR/diamond ATRcorrected
UV042821HA52	14	Fragment	619	ATR-Polymer2	D_PC	Polycarbonate(PC) DuraSamplIR-II
UV042821HA52	15	Fiber	581	ATR-Polymer2	D_Nylon6_12	Nylon 6/12(Polyhexamethylene dodecanediamide) DuraSamplIR-II
UV042821HA52	16	Film	574	IRs Polymer2	PES	PESFilm
UV042821HA52	17	Fragment	720	T-Polymer2	T_PC2	Polycarbonate(PC) Transmission(Microscope)
UV042821HA52	18	Fragment	594	T-Polymer2	Epoxy	Epoxy Adhesives Transmission(Microscope)

## Sheet: Working Sheet
count	Sample	number	Type	Score	Maximum Hits	Library	Comment
1	UV042821HA34	3	Fiber	564	ATR-Polymer2	D_Additive6	Polymer Additive(Sanol LS770) DuraSamplIR-II
2	UV042821HA46	2	Fiber	566	IRs Polymer2	PES	PESFilm
3	DR042821HA32	3	fiber	569	IRs Polymer2	PI2	PolyimideFilm
4	DR041120HG02	6	Fiber	569	T-Polymer2	PEEK	Polyetheretherketone(PEEK) Transmission(Microscope)
5	DR041120HT03	11	Fiber	569	T-Polymer2	High-trans Polybutadiene	High-trans Butadiene Rubber(High-trans Polybutadiene) Transmission(Microscope)
6	DR041120HJ28	1	Fiber	570	T-Polymer2	T_HDPE	High Density Polyethylene(HDPE) Transmission(Microscope)
7	DR041120HR01	3	Fiber	570	T-Polymer2	PS	Polystyrene(PS) Transmission(Microscope)
8	UV042821HA22	13	Fiber	570	ATR-Polymer2	D_PI3	Polyimide(Electronic Parts) DuraSamplIR-II
9	UV042821HA48	9	Fiber	570	ATR-Polymer2	D_PEEK	Polyetheretherketone(PEEK) DuraSamplIR-II
10	UV042821HA11	1	Fragment	571	IRs Polymer2	PP	PolypropyleneFilm
11	DR041120HJ28	3	Fiber	572	IRs Polymer2	EPOXY1	Epoxy resin (liquid)ATR/diamond ATRcorrected
12	UV042821HA34	7	Fiber	572	T-Polymer2	Silicon Grease	Silicon Grease Transmission(Microscope)
13	UV042821HA04	5	Fragment	573	ATR-Polymer2	D_Additive1	Polymer Additive(Irganox 1010) DuraSamplIR-II
14	UV042821HA52	16	Fragment	574	IRs Polymer2	PES	PESFilm
15	DR042821HA32	1	fiber	575	IRs Polymer2	PS	PolystyreneATR/diamond ATRcorrected
16	DR041120HE02	10	Fragment	575	IRs Polymer2	URETHAN	Polyurethane FormATR/ZnSe ATRcorrected
17	UV042821HA05	4	Fiber	575	ATR-Polymer2	D_Polyethyleneglycol	Polyethylene Glycol 20000 DuraSamplIR-II
18	UV042821HA05	16	Fiber	575	IRs Polymer2	PS	PolystyreneATR/diamond ATRcorrected
19	DR041120HE02	6	Fiber	576	ATR-Polymer2	D_Polyethyleneglycol	Polyethylene Glycol 20000 DuraSamplIR-II
20	UV042821HA11	4	Fiber	576	IRs Polymer2	PS	PolystyreneATR/diamond ATRcorrected
21	UV042821HA31	8	Fiber	576	T-Polymer2	PPS	Polyphenylene Sulfie(PPS) Transmission(Microscope)
22	DR041120HE02	11	Fiber	577	ATR-Polymer2	D_ButylMethacrylate_IsobutylMethacrylate	Butyl Methacrylate/Isobutyl Methacrylate Copolymer(50:50) DuraSamplIR-II
23	UV042821HA05	5	Fiber	577	IRs Polymer2	BUTYL_RB	Butyl rubber with salt(salt:1540,1016,876cm-1)ATR/diamond ATRcorrected
24	UV042821HA34	15	Fiber	577	IRs Polymer2	Irganox1330	Irganox 1330 ANTIOXIDANT (Penol)C54H78O31,3,5-TRIMETHYL-2,4,6-TRIS(3,5-DI-tert-BUTYL-4-HYDROXYBENZYL)BENZENECAS NO. 1709-70-2ATR/diamond ATRcorrected
25	UV042821HA48	15	Fragment	577	T-Polymer2	PBT	Polybutylene Terephthalate(PBT) Transmission(Microscope)
26	DR041120HR01	17	Fiber	578	T-Polymer2	Acrylic Adhesive	Acrylic Adhesive Transmission(Microscope)
27	UV042821HA04	3	Fiber	578	ATR-Polymer2	D_PTFE2	Poly(Tetrafluoroethylene) DuraSamplIR-II
28	UV042821HA31	1	Fiber	578	ATR-Polymer2	D_PI2	Polyimide(KAPTON) DuraSamplIR-II
29	UV042821HA31	10	Fragment	578	T-Polymer2	IR-trans	trans-Polyisoprene Rubber(IR-trans) Transmission(Microscope)
30	DR041120HM01	2	Fiber	579	T-Polymer2	Polyester	Polyester Film(TOYOBO ESTER FILM & ESPET FILM) Transmission(Microscope)
31	DR041120HT03	12	Fiber	579	IRs Polymer2	Irganox1010	Irganox1010ANTIOXIDANT(Phenol)C73H108O12CAS NO. 6683-19-8ATR/diamond ATRcorrected
32	UV042821HA05	2	Unknown	579	T-Polymer2	PPS	Polyphenylene Sulfie(PPS) Transmission(Microscope)
33	UV042821HA05	14	Fiber	579	ATR-Polymer2	D_Additive6	Polymer Additive(Sanol LS770) DuraSamplIR-II
34	UV042821HA12	1	Fiber	579	T-Polymer2	T_PVC with PhenoricSulfonicEster	Polyvinylchloride with Phenolic ester of aliphatic sulfonic acid Transmission(Microscope)
35	DR041120HG06	1	Fiber	580	ATR-Polymer2	D_IR-cis	cis-Polyisoprene Rubber(IR-cis) DuraSamplIR-II
36	DR041120HG06	12	Fragment	580	T-Polymer2	T_PhenoxyResin	Phenoxy Resin Transmission(Microscope)
37	DR041120HJ03	3	Fragment	580	IRs Polymer2	NYLON6	Nylon 6 ATR/diamond ATRcorrected
38	DR041120HT03	8	Fiber	580	ATR-Polymer2	D_Polycaprolactone	Polycaprolactone DuraSamplIR-II
39	UV042821HA05	6	Fiber	580	T-Polymer2	Epoxy	Epoxy Resin(Electronic Parts-3) Transmission(Microscope)
40	UV042821HA05	7	Fiber	580	T-Polymer2	T_Polydiallyl_Isophthalate	Poly(Diallyl Isophthalate) Transmission(Microscope)
41	UV042821HA46	4	Fragment	580	IRs Polymer2	P-EPQ	P-EPQANTIOXIDANT PHOSPHONITE COMPOUNDC68H92O4P2CAS NO. ATR/diamond ATRcorrected
42	UV042821HA46	16	Fragment	580	ATR-Polymer2	D_Polyester2	Polyester Film(TAIKO-FE) DuraSamplIR-II
43	DR042821HA32	2	fragment	581	ATR-Polymer2	D_Poly_alpha_Methylstyrene	Poly(alpha-Methylstyrene) DuraSamplIR-II
44	UV042821HA04	21	Fiber	581	ATR-Polymer2	D_1_2_Polybutadiene	1,2-Polybutadiene DuraSamplIR-II
45	UV042821HA11	6	Fragment	581	IRs Polymer2	PIP	Polyisoprene [-CH2CH(CH3)=CHCH2-]nFilm
46	UV042821HA12	3	Fragment	581	T-Polymer2	Epoxy	Epoxy Adhesives Transmission(Microscope)
47	UV042821HA12	6	Fragment	581	T-Polymer2	PAR	Polyarylate(PAR) Transmission(Microscope)
48	UV042821HA34	13	Fragment	581	IRs Polymer2	PETG	Polyethylene glycolORIGIN Date: 92/03/27 File: PETG.DXINFRARED SPECTROPHOTOMETER FTIR-8000 SERIES
49	UV042821HA46	7	Fragment	581	ATR-Polymer2	D_PI4	Polyimide DuraSamplIR-II
50	UV042821HA52	15	Fiber	581	ATR-Polymer2	D_Nylon6_12	Nylon 6/12(Polyhexamethylene dodecanediamide) DuraSamplIR-II	Duplicte # 7
51	DR041120HG06	8	Can't See	582	ATR-Polymer2	D_Polyamide6	Polyamide(Nylon12) DuraSamplIR-II
52	DR041120HG06	14	Fragment	582	T-Polymer2	Styrene-Ethylene-Butylene	Styrene-Ethylene-Butylene Transmission(Microscope)
53	DR041120HJ03	4	Fragment	582	IRs Polymer2	SanolLS770	Sanol LS770HINDERED AMINE LIGHT STABILIZERBIS(2,2,6,6-TETRAMETHYL-4-PIPERIDYL)SEBACATEC28H52N2O4CAS NO. 52829-07-9ATR/diamond ATRcorrected
54	DR041120HJ28	2	Fiber	582	T-Polymer2	PC	Polycarbonate(PC) Transmission(Microscope)
55	UV042821HA05	15	Fiber	582	ATR-Polymer2	D_PPS	Polyphenylene Sulfide(PPS) DuraSamplIR-II
56	UV042821HA05	21	Fragment	582	IRs Polymer2	PHSI	Phenylsilicone rubberATR/diamond ATRcorrected
57	UV042821HA31	5	Fragment	582	IRs Polymer2	PP	PolypropyleneFilm
58	DR041120HR01	16	Fiber	583	ATR-Polymer2	D_PPS2	Poly(Phenylene Sulfide) DuraSamplIR-II
59	UV042821HA12	14	Fragment	583	T-Polymer2	PVDF	Polyvinylidene Fluoride(PVDF) Transmission(Microscope)
60	UV042821HA31	6	Fiber	583	ATR-Polymer2	D_Additive1	Polymer Additive(Irganox 1010) DuraSamplIR-II
61	DR041120HG06	4	Fiber	584	ATR-Polymer2	D_PI3	Polyimide(Electronic Parts) DuraSamplIR-II
62	UV042821HA04	16	Fiber	584	ATR-Polymer2	D_Polyethyleneglycol	Polyethylene Glycol 20000 DuraSamplIR-II
63	UV042821HA46	1	Fiber	584	IRs Polymer2	PVDC	PVDC,Poly (vinylidene chloride) /wlap filmATR/diamond ATRcorrected
64	DR042821HA32	4	fiber	585	T-Polymer2	Epoxy	Epoxy Adhesives Transmission(Microscope)
65	DR041120HG06	11	Fiber	585	ATR-Polymer2	D_PVDF	Polyvinylindene Fluoride(PVDF) DuraSamplIR-II
66	UV042821HA46	3	Fragment	585	ATR-Polymer2	D_PP_Chlorinated	Polypropylene, Chlorinated(Chlorine content 65%) DuraSamplIR-II
67	UV042821HA48	3	Fragment	585	IRs Polymer2	IrganoxMD1024	Irganox MD1024 HINDERED PHENOLIC ANTIOXIDANT-METAL DEACTIVATOR1,2-BIS(3,5-DI-tert-BUTYL-4-HYDROXYHYDROCINNAMOYL)HYDRAZINE; HINDERED PHENOLC34H52O4N2CAS NO. 32687-78-8ATR/diamond ATRcorrected
68	DR041120HG02	4	Fiber	586	ATR-Polymer2	D_Poly_1_Butene	Poly(1-Butene), Isotactic DuraSamplIR-II
69	DR041120HG06	3	Fiber	586	IRs Polymer2	BUTYL_RB	Butyl rubber with salt(salt:1540,1016,876cm-1)ATR/diamond ATRcorrected
70	UV042821HA05	8	Fiber	586	IRs Polymer2	LLDPE1	Low Density PolyethyleneFilm
71	UV042821HA11	2	Fragment	586	ATR-Polymer2	D_Additive2	Polymer Additive(Irganox 1076) DuraSamplIR-II
72	UV042821HA34	11	Fragment	586	ATR-Polymer2	D_Polysulfone	Polysulfone DuraSamplIR-II
73	DR041120HJ03	7	Fragment	587	T-Polymer2	PEG	Polyethylene Glycol 20000 Transmission(Microscope)
74	DR041120HM01	9	Fragment	587	T-Polymer2	Epoxy7	Epoxy Resin Transmission(Microscope)
75	DR041120HR01	1	Fiber	587	T-Polymer2	T_1_2_Polybutadiene	1,2-Polybutadiene Transmission(Microscope)
76	UV042821HA05	18	Fragment	587	ATR-Polymer2	D_Additive4	Polymer Additive(Irganox MD1024) DuraSamplIR-II
77	UV042821HA31	3	Fragment	587	ATR-Polymer2	D_Poly_4_Methyl_1_Pentene	Poly(4-Methyl-1 Pentene) DuraSamplIR-II
78	UV042821HA34	10	Fragment	587	ATR-Polymer2	D_IIR	IIR(Isobutylene-Isoprene Rubber) DuraSamplIR-II
79	DR041120HG06	16	Fragment	588	ATR-Polymer2	D_PC2	Polycarbonate(PC) DuraSamplIR-II
80	DR041120HM01	10	Fiber	588	ATR-Polymer2	D_Polyester4	Polyester Film(TOYOBO ESTER FILM & ESPET FILM) DuraSamplIR-II
81	DR041120HT03	3	Fragment	588	T-Polymer2	Irganox 1330	Polymer Additive(Irganox 1330) Transmission(Microscope)
82	UV042821HA05	11	Fiber	588	ATR-Polymer2	D_PC-PBT	Polycarbonate/Polybutylene Terephthalate(PC/PBT) DuraSamplIR-II
83	UV042821HA05	24	Fragment	588	ATR-Polymer2	D_Epoxy6	Epoxy Adhesives DuraSamplIR-II
84	UV042821HA31	14	Fragment	588	ATR-Polymer2	D_Additive3	Polymer Additive(Irganox 1330) DuraSamplIR-II
85	DR041120HG02	3	Drop	589	T-Polymer2	Silicon Grease	Silicon Grease Transmission(Microscope)
86	DR041120HJ03	1	Fiber	589	IRs Polymer2	BR3	Polybutadiene High-transFilm
87	DR041120HR01	19	Fiber	589	T-Polymer2	PP	Polypropylene(PP) Transmission(Microscope)
88	UV042821HA22	6	Fiber	589	ATR-Polymer2	D_PolyethyleneOxide	Poly(Ethylene Oxide) DuraSamplIR-II
89	UV042821HA22	12	Fiber	589	ATR-Polymer2	D_SB	Styrene/Butadiene(SB) SBS Block Copolymer(Styrene content 30%) DuraSamplIR-II
90	UV042821HA22	14	Fragment	589	ATR-Polymer2	D_Ht-BR	High-trans Butadiene Rubber(High-trans Polubutadiene) DuraSamplIR-II
91	UV042821HA52	7	Fragment	589	T-Polymer2	PC	Polycarbonate(PC) Transmission(Microscope)
92	UV042821HA52	9	Fragment	589	IRs Polymer2	PS	PolystyreneATR/diamond ATRcorrected
93	DR042821HA32	15	fiber	590	IRs Polymer2	PPS	PPSFilm
94	DR041120HG02	5	Fiber	590	IRs Polymer2	RAMIE	Ramie FiberATR/diamond ATRcorrected
95	DR041120HG06	6	Fragment	590	T-Polymer2	PC	Polycarbonate(PC) Transmission(Microscope)
96	UV042821HA05	3	Fiber	590	IRs Polymer2	DLTDP	DLTDPANTIOXIDANT (CONTAINING SULFUR)DILAURYL THIODIPROPIONATEC30H58O4SCAS NO. 123-28-4ATR/diamond ATRcorrected
97	UV042821HA05	17	Fiber	590	IRs Polymer2	DLTDP	DLTDPANTIOXIDANT (CONTAINING SULFUR)DILAURYL THIODIPROPIONATEC30H58O4SCAS NO. 123-28-4ATR/diamond ATRcorrected
98	UV042821HA11	7	Fragment	590	IRs Polymer2	PPS	PPSFilm
99	UV042821HA31	15	Fragment	590	IRs Polymer2	PC	Polycarbonate/CD-ROMATR/diamond ATRcorrected
100	UV042821HA34	14	Fragment	590	T-Polymer2	T_EVA-6	Ethylene/Vinyl Acetate(EVA) Copolymer(Vinyl Acetate content 40%) Transmission(Microscope)
101	UV042821HA52	2	Fragment	590	IRs Polymer2	FEP	FEP,Tetrafluoroethylene HexafluoropropyleneATR/diamond ATRcorrected
102	UV042821HA52	5	Fragment	590	IRs Polymer2	PI1	Polyimide KAPTONFilm
103	UV042821HA52	11	Fiber	590	T-Polymer2	High-trans Polybutadiene	High-trans Butadiene Rubber(High-trans Polybutadiene) Transmission(Microscope)
104	DR041120HJ03	2	Fiber	591	ATR-Polymer2	D_Styrene_Maleic_Anhydride	Styrene/Maleic Anhydride Copolymer(50/50 Copolymer) DuraSamplIR-II
105	DR041120HJ03	5	Fragment	591	IRs Polymer2	PEI	Poly etherimideFilm
106	DR041120HJ28	4	Fiber	591	IRs Polymer2	P-EPQ	P-EPQANTIOXIDANT PHOSPHONITE COMPOUNDC68H92O4P2CAS NO. ATR/diamond ATRcorrected
107	DR041120HM01	4	Fragment	591	ATR-Polymer2	D_Additive4	Polymer Additive(Irganox MD1024) DuraSamplIR-II
108	DR041120HR01	6	Fiber	591	ATR-Polymer2	D_PolyethyleneOxide	Poly(Ethylene Oxide) DuraSamplIR-II
109	UV042821HA34	9	Fragment	591	T-Polymer2	Epoxy	Epoxy Resin(Electronic Parts-2) Transmission(Microscope)
110	UV042821HA46	5	Fragment	591	ATR-Polymer2	D_PPO-PA	Polyphenylene Oxide(Polyphenylene Ether)/Polyamide(PPO/PA NORYL) DuraSamplIR-II
111	UV042821HA46	17	Fragment	591	T-Polymer2	Epoxy	Epoxy Adhesives Transmission(Microscope)
112	UV042821HA48	5	Fragment	591	ATR-Polymer2	D_PVC_Carboxylated	Poly(Vinyl Chloride)(PVC), Carboxylated(Carboxyl content 1.8%) DuraSamplIR-II
113	DR041120HE02	12	Fragment	592	IRs Polymer2	PEI	Poly etherimideFilm
114	DR041120HG06	19	Fragment	592	T-Polymer2	PC	Polycarbonate(PC) Transmission(Microscope)
115	UV042821HA05	12	Fiber	592	T-Polymer2	PI	Polyimide(Electronic Parts) Transmission(Microscope)
116	UV042821HA12	4	Fragment	592	ATR-Polymer2	D_PVDF	Polyvinylindene Fluoride(PVDF) DuraSamplIR-II
117	UV042821HA12	11	Fragment	592	ATR-Polymer2	D_PI1	Polyimide(UPILEX) DuraSamplIR-II
118	UV042821HA34	8	Fiber	592	IRs Polymer2	PETG-20	POLYETHYLENE GLYCOLORIGIN Date: 92/04/09 File: PETG-20.DXINFRARED SPECTROPHOTOMETER FTIR-8000 SERIES
119	DR042821HA32	8	fiber	593	ATR-Polymer2	D_PI1	Polyimide(UPILEX) DuraSamplIR-II
120	DR041120HR01	18	Fiber	593	IRs Polymer2	BR3	Polybutadiene High-transFilm
121	UV042821HA04	1	Fragment	593	T-Polymer2	Epoxy	Epoxy Resin Transmission(Microscope)
122	UV042821HA46	14	Fragment	593	ATR-Polymer2	D_Aramid	Aramid Fiber DuraSamplIR-II
123	UV042821HA48	8	Fragment	593	T-Polymer2	PC	Polycarbonate(PC) Transmission(Microscope)
124	UV042821HA52	13	Fragment	593	IRs Polymer2	DLTDP	DLTDPANTIOXIDANT (CONTAINING SULFUR)DILAURYL THIODIPROPIONATEC30H58O4SCAS NO. 123-28-4ATR/diamond ATRcorrected
125	DR041120HM01	7	Fiber	594	T-Polymer2	T_1_2_Polybutadiene	1,2-Polybutadiene Transmission(Microscope)
126	UV042821HA52	8	Fragment	594	T-Polymer2	T_PC2	Polycarbonate(PC) Transmission(Microscope)
127	UV042821HA52	18	Fragment	594	T-Polymer2	Epoxy	Epoxy Adhesives Transmission(Microscope)
128	DR041120HM01	5	Fragment	595	IRs Polymer2	Chimassorb944LD	Chimassorb 944LDHINDERED AMINE LIGHT STABILIZER (POLYMERIC)CAS NO. 71878-19-8ATR/diamond ATRcorrected
129	DR041120HT03	5	Fragment	595	ATR-Polymer2	D_PVC with TerephthalicEster	Polyvinylchloride with BIS(2-Ehylhexyl)Terephthalate DuraSampllR
130	DR041120HT03	13	Fragment	595	IRs Polymer2	PVDC	PVDC,Poly (vinylidene chloride) /wlap filmATR/diamond ATRcorrected
131	UV042821HA12	8	Fragment	595	T-Polymer2	Irganox 1330	Polymer Additive(Irganox 1330) Transmission(Microscope)
132	UV042821HA31	11	Fragment	595	IRs Polymer2	IrganoxMD1024	Irganox MD1024 HINDERED PHENOLIC ANTIOXIDANT-METAL DEACTIVATOR1,2-BIS(3,5-DI-tert-BUTYL-4-HYDROXYHYDROCINNAMOYL)HYDRAZINE; HINDERED PHENOLC34H52O4N2CAS NO. 32687-78-8ATR/diamond ATRcorrected
133	UV042821HA46	12	Fragment	595	T-Polymer2	Epoxy	Epoxy Resin(Electronic Parts-3) Transmission(Microscope)
134	UV042821HA48	1	Fragment	595	T-Polymer2	Epoxy	Epoxy Resin(Electronic Parts-3) Transmission(Microscope)
135	DR041120HE02	2	Fragment	596	IRs Polymer2	PETG-20	POLYETHYLENE GLYCOLORIGIN Date: 92/04/09 File: PETG-20.DXINFRARED SPECTROPHOTOMETER FTIR-8000 SERIES
136	DR041120HG06	10	Fiber	596	ATR-Polymer2	D_PES	Polyethersulfone(PES) DuraSamplIR-II
137	UV042821HA05	23	Can't see	596	ATR-Polymer2	D_Poly_alpha_Methylstyrene	Poly(alpha-Methylstyrene) DuraSamplIR-II
138	UV042821HA52	6	Fragment	596	ATR-Polymer2	D_Poly_4_Methyl_1_Pentene	Poly(4-Methyl-1 Pentene) DuraSamplIR-II
139	UV042821HA52	12	Fragment	596	T-Polymer2	T_1_2_Polybutadiene	1,2-Polybutadiene Transmission(Microscope)
140	UV042821HA31	13	Fragment	597	IRs Polymer2	DLTDP	DLTDPANTIOXIDANT (CONTAINING SULFUR)DILAURYL THIODIPROPIONATEC30H58O4SCAS NO. 123-28-4ATR/diamond ATRcorrected
141	UV042821HA34	4	Fragment	597	ATR-Polymer2	D_POM2	Polyacetal(Electronic Parts-2) DuraSamplIR-II
142	DR042821HA32	13	fiber	598	IRs Polymer2	PB	PolybuteneATR/diamond ATRcorrected
143	DR041120HG02	1	Fragment	598	ATR-Polymer2	D_PC2	Polycarbonate(PC) DuraSamplIR-II
144	UV042821HA05	13	Fiber	598	ATR-Polymer2	D_Additive3	Polymer Additive(Irganox 1330) DuraSamplIR-II
145	UV042821HA12	2	Fragment	598	T-Polymer2	PPS	Polyphenylene Sulfie(PPS) Transmission(Microscope)
146	UV042821HA31	17	Fragment	598	T-Polymer2	T_1_2_Polybutadiene	1,2-Polybutadiene Transmission(Microscope)
147	UV042821HA46	11	Fragment	598	ATR-Polymer2	D_Hc-BR2	High-cis Butadiene Rubber(High-cis Polybutadiene) DuraSamplIR-II
148	DR042821HA32	9	fragment	599	IRs Polymer2	RAMIE	Ramie FiberATR/diamond ATRcorrected
149	DR041120HJ28	5	Fiber	599	T-Polymer2	Polyester	Polyester Film(TOYOBO ESTER FILM & ESPET FILM) Transmission(Microscope)
150	UV042821HA12	12	Fragment	599	T-Polymer2	Epoxy	Epoxy Adhesives Transmission(Microscope)
151	UV042821HA12	17	Fiber	599	IRs Polymer2	PPS	PPSFilm
152	UV042821HA22	4	Fragment	599	T-Polymer2	T_HDPE	High Density Polyethylene(HDPE) Transmission(Microscope)
153	UV042821HA48	12	Fragment	599	T-Polymer2	Epoxy	Epoxy Resin Transmission(Microscope)
154	DR041120HG02	7	Fragment	600	IRs Polymer2	PETG-20	POLYETHYLENE GLYCOLORIGIN Date: 92/04/09 File: PETG-20.DXINFRARED SPECTROPHOTOMETER FTIR-8000 SERIES
155	UV042821HA12	10	Fragment	600	ATR-Polymer2	D_Additive6	Polymer Additive(Sanol LS770) DuraSamplIR-II
156	UV042821HA12	13	Fragment	600	ATR-Polymer2	D_Polyethyleneglycol	Polyethylene Glycol 20000 DuraSamplIR-II
157	UV042821HA31	16	Fragment	600	T-Polymer2	Epoxy7	Epoxy Resin Transmission(Microscope)
158	UV042821HA34	1	Unknown	600	ATR-Polymer2	D_Additive3	Polymer Additive(Irganox 1330) DuraSamplIR-II
159	UV042821HA46	9	Fragment	600	IRs Polymer2	PS1	PolystyreneFilm
160	DR041120HG02	2	Fragment	601	IRs Polymer2	PEEK	PEEKFilm
161	DR041120HG06	17	Fragment	601	T-Polymer2	T_PhenoxyResin	Phenoxy Resin Transmission(Microscope)
162	UV042821HA31	9	Fragment	601	ATR-Polymer2	D_PI2	Polyimide(KAPTON) DuraSamplIR-II
163	DR041120HR01	15	Fragment	602	ATR-Polymer2	D_Cellulose5	Ramie DuraSamplIR-II
164	UV042821HA11	8	Fragment	602	T-Polymer2	Epoxy7	Epoxy Resin Transmission(Microscope)
165	UV042821HA31	19	Fragment	602	T-Polymer2	T_PhenoxyResin	Phenoxy Resin Transmission(Microscope)
166	UV042821HA46	10	Fragment	602	ATR-Polymer2	D_PI1	Polyimide(UPILEX) DuraSamplIR-II
167	DR042821HA32	11	fragment	603	ATR-Polymer2	D_PC-PBT	Polycarbonate/Polybutylene Terephthalate(PC/PBT) DuraSamplIR-II
168	DR041120HG06	15	Fragment	603	ATR-Polymer2	D_PC	Polycarbonate(PC) DuraSamplIR-II
169	DR041120HR01	10	Fragment	603	ATR-Polymer2	D_PC	Polycarbonate(PC) DuraSamplIR-II
170	UV042821HA22	1	Fragment	603	T-Polymer2	Epoxy	Epoxy Resin(Electronic Parts-1) Transmission(Microscope)
171	UV042821HA22	11	Fiber	603	ATR-Polymer2	D_Ht-BR	High-trans Butadiene Rubber(High-trans Polubutadiene) DuraSamplIR-II
172	UV042821HA48	11	Fragment	603	T-Polymer2	PAR	Polyarylate(PAR) Transmission(Microscope)
173	UV042821HA46	6	Fragment	604	T-Polymer2	Irganox MD1024	Polymer Additive(Irganox MD1024) Transmission(Microscope)
174	DR041120HG02	8	Fragment	605	IRs Polymer2	SILICO2	Silicone rubberATR/diamond ATRcorrected
175	UV042821HA05	20	Fiber	605	ATR-Polymer2	D_PEI	Polyetherimide(PEI) DuraSamplIR-II
176	UV042821HA31	4	Fragment	605	T-Polymer2	PPS	Polyphenylene Sulfie(PPS) Transmission(Microscope)
177	UV042821HA48	4	Fragment	605	ATR-Polymer2	D_PC	Polycarbonate(PC) DuraSamplIR-II
178	DR041120HE02	3	Fragment	606	ATR-Polymer2	D_1_2_Polybutadiene	1,2-Polybutadiene DuraSamplIR-II
179	UV042821HA04	4	Fragment	606	ATR-Polymer2	D_Polybuten	Polybuten DuraSamplIR-II
180	UV042821HA22	5	Fiber	606	IRs Polymer2	PPS	PPSFilm
181	UV042821HA22	10	Fragment	606	T-Polymer2	Irganox 1076	Polymer Additive(Irganox 1076) Transmission(Microscope)
182	UV042821HA31	18	Fragment	606	ATR-Polymer2	D_Polyisoprene_Chlorinated	Polyisoprene, Chlorinated(Chlorine content 65%) DuraSamplIR-II
183	UV042821HA34	12	Fragment	606	ATR-Polymer2	D_IR-trans	trans-Polyisoprene Rubber(IR-trans) DuraSamplIR-II
184	UV042821HA46	8	Fragment	606	IRs Polymer2	PETG	Polyethylene glycolORIGIN Date: 92/03/27 File: PETG.DXINFRARED SPECTROPHOTOMETER FTIR-8000 SERIES
185	DR041120HG06	9	Fragment	607	T-Polymer2	Polyacetylene	Polyacetylene Transmission(Microscope)
186	DR041120HM01	6	Fragment	607	ATR-Polymer2	D_Polysulfone	Polysulfone DuraSamplIR-II
187	UV042821HA05	1	Fiber	607	ATR-Polymer2	D_PPS	Polyphenylene Sulfide (PPS) DuraSamplIR-II
188	UV042821HA12	7	Fragment	608	ATR-Polymer2	D_PVC with PhthalicEster 1	Polyvinylchloride with Phthalate DuraSampllR
189	UV042821HA34	6	Fragment	608	IRs Polymer2	SBS	SBSFilm
190	UV042821HA05	9	Fragment	609	IRs Polymer2	P-EPQ	P-EPQANTIOXIDANT PHOSPHONITE COMPOUNDC68H92O4P2CAS NO. ATR/diamond ATRcorrected
191	DR041120HG06	21	Fragment	611	T-Polymer2	T_1_2_Polybutadiene	1,2-Polybutadiene Transmission(Microscope)
192	UV042821HA11	5	Fragment	612	ATR-Polymer2	D_Epoxy1	Epoxy Resin(Electronic Parts-1) DuraSamplIR-II
193	DR042821HA32	14	fragment	613	T-Polymer2	PC	Polycarbonate(PC) Transmission(Microscope)
194	UV042821HA12	5	Fragment	613	ATR-Polymer2	D_Additive7	Polymer Additive(Chimassorb 944LD) DuraSamplIR-II
195	UV042821HA34	2	Fragment	613	ATR-Polymer2	D_Epoxy7	Epoxy Resin DuraSamplIR-II
196	UV042821HA22	2	Fragment	614	ATR-Polymer2	D_PC-PBT	Polycarbonate/Polybutylene Terephthalate(PC/PBT) DuraSamplIR-II
197	DR041120HM01	8	Fragment	615	ATR-Polymer2	D_PPS2	Poly(Phenylene Sulfide) DuraSamplIR-II
198	DR041120HR01	11	Fragment	615	T-Polymer2	T_PC2	Polycarbonate(PC) Transmission(Microscope)
199	UV042821HA46	13	Fragment	616	ATR-Polymer2	D_PC	Polycarbonate(PC) DuraSamplIR-II
200	UV042821HA48	7	Fragment	617	T-Polymer2	T_PVC with PhenoricSulfonicEster	Polyvinylchloride with Phenolic ester of aliphatic sulfonic acid Transmission(Microscope)
201	UV042821HA48	13	Fragment	617	ATR-Polymer2	D_PC	Polycarbonate(PC) DuraSamplIR-II
202	DR041120HR01	14	Fragment	618	T-Polymer2	PC	Polycarbonate(PC) Transmission(Microscope)
203	DR041120HT03	2	Fragment	618	T-Polymer2	PPS	Polyphenylene Sulfie(PPS) Transmission(Microscope)
204	DR041120HG02	10	Fragment	619	T-Polymer2	T_PC2	Polycarbonate(PC) Transmission(Microscope)
205	UV042821HA04	10	Fragment	619	IRs Polymer2	MELAMIN	Melamin FormATR/diamond ATRcorrected
206	UV042821HA22	9	Fragment	619	ATR-Polymer2	D_PC	Polycarbonate(PC) DuraSamplIR-II
207	UV042821HA52	14	Fragment	619	ATR-Polymer2	D_PC	Polycarbonate(PC) DuraSamplIR-II
208	DR041120HE02	4	Fragment	621	T-Polymer2	Silicon Grease	Silicon Grease Transmission(Microscope)
209	DR041120HR01	2	Fragment	621	IRs Polymer2	PC	Polycarbonate/CD-ROMATR/diamond ATRcorrected
210	UV042821HA52	10	Fragment	622	T-Polymer2	PC	Polycarbonate(PC) Transmission(Microscope)
211	UV042821HA22	8	Fragment	624	T-Polymer2	PC	Polycarbonate(PC) Transmission(Microscope)
212	DR042821HA32	7	fragment	625	T-Polymer2	PC	Polycarbonate(PC) Transmission(Microscope)
213	DR042821HA32	12	fragment	626	ATR-Polymer2	D_Epoxy5	Epoxy Resin DuraSamplIR-II
214	DR041120HM01	3	Fragment	626	ATR-Polymer2	D_PVC with PhenoricSulfonicEster	Polyvinylchloride with Phenolic ester of aliphatic sulfonic acid DuraSampllR
215	DR041120HM01	1	Fragment	628	ATR-Polymer2	D_PC	Polycarbonate(PC) DuraSamplIR-II
216	UV042821HA31	7	Fragment	628	ATR-Polymer2	D_Epoxy1	Epoxy Resin(Electronic Parts-1) DuraSamplIR-II
217	UV042821HA48	2	Fragment	628	T-Polymer2	Epoxy	Epoxy Resin Transmission(Microscope)
218	UV042821HA04	13	Fragment	629	T-Polymer2	PC	Polycarbonate(PC) Transmission(Microscope)
219	UV042821HA31	12	Fragment	629	T-Polymer2	PC	Polycarbonate(PC) Transmission(Microscope)
220	DR042821HA32	6	fragment	632	ATR-Polymer2	D_PC	Polycarbonate(PC) DuraSamplIR-II
221	DR041120HR01	4	Fragment	632	T-Polymer2	PC	Polycarbonate(PC) Transmission(Microscope)
222	UV042821HA11	3	Fragment	632	ATR-Polymer2	D_PPS2	Poly(Phenylene Sulfide) DuraSamplIR-II
223	UV042821HA04	20	Fragment	634	T-Polymer2	FEP	Tetrafluoroethylene-Hexafluoropropylene(FEP) Transmission(Microscope)
224	DR042821HA32	5	fragment	635	T-Polymer2	T_PhenoxyResin	Phenoxy Resin Transmission(Microscope)
225	DR041120HE02	5	Fragment	635	T-Polymer2	PC	Polycarbonate(PC) Transmission(Microscope)
226	UV042821HA12	15	Fragment	636	ATR-Polymer2	D_PC	Polycarbonate(PC) DuraSamplIR-II
227	UV042821HA04	12	Fragment	637	T-Polymer2	PC	Polycarbonate(PC) Transmission(Microscope)
228	UV042821HA04	19	Fragment	637	T-Polymer2	PC	Polycarbonate(PC) Transmission(Microscope)
229	UV042821HA52	4	Fragment	637	ATR-Polymer2	D_Epoxy5	Epoxy Resin DuraSamplIR-II
230	DR041120HT03	9	Fragment	638	T-Polymer2	PC	Polycarbonate(PC) Transmission(Microscope)
231	UV042821HA31	2	Fragment	640	T-Polymer2	PC	Polycarbonate(PC) Transmission(Microscope)
232	UV042821HA52	1	Fragment	640	T-Polymer2	PC	Polycarbonate(PC) Transmission(Microscope)
233	DR041120HT03	4	Fragment	641	T-Polymer2	Polyacetylene	Polyacetylene Transmission(Microscope)
234	UV042821HA04	14	Fragment	641	ATR-Polymer2	D_PC	Polycarbonate(PC) DuraSamplIR-II
235	UV042821HA04	11	Fragment	642	T-Polymer2	PC	Polycarbonate(PC) Transmission(Microscope)
236	DR041120HE02	9	Fragment	644	T-Polymer2	PC	Polycarbonate(PC) Transmission(Microscope)
237	DR041120HG06	7	Fragment	644	ATR-Polymer2	D_PC	Polycarbonate(PC) DuraSamplIR-II
238	DR041120HG06	13	Fragment	644	ATR-Polymer2	D_PC	Polycarbonate(PC) DuraSamplIR-II
239	DR041120HJ03	6	Fragment	645	ATR-Polymer2	D_PC	Polycarbonate(PC) DuraSamplIR-II
240	DR041120HT03	10	Fragment	645	ATR-Polymer2	D_PC	Polycarbonate(PC) DuraSamplIR-II
241	DR041120HG06	18	Fragment	647	T-Polymer2	PC	Polycarbonate(PC) Transmission(Microscope)
242	DR041120HR01	12	Fragment	647	ATR-Polymer2	D_PC	Polycarbonate(PC) DuraSamplIR-II
243	DR041120HG02	9	Fragment	649	T-Polymer2	T_PC2	Polycarbonate(PC) Transmission(Microscope)
244	DR041120HM01	11	Fragment	651	T-Polymer2	PC	Polycarbonate(PC) Transmission(Microscope)
245	UV042821HA04	15	Fragment	652	T-Polymer2	Ramie	Ramie Transmission(Microscope)
246	UV042821HA04	18	Fragment	654	T-Polymer2	PC	Polycarbonate(PC) Transmission(Microscope)
247	DR041120HR01	8	Fiber	656	T-Polymer2	T_PC2	Polycarbonate(PC) Transmission(Microscope)
248	DR041120HT03	7	Fragment	656	IRs Polymer2	NY-MXD6	Nylon MXD6Film
249	DR041120HT03	6	Fragment	657	IRs Polymer2	PC	Polycarbonate/CD-ROMATR/diamond ATRcorrected
250	DR041120HR01	13	Fragment	658	T-Polymer2	Paper	Paper Transmission(Microscope)
251	DR041120HE02	1	Fragment	659	T-Polymer2	T_PC2	Polycarbonate(PC) Transmission(Microscope)
252	UV042821HA04	9	Fragment	660	T-Polymer2	PC	Polycarbonate(PC) Transmission(Microscope)
253	DR041120HG06	20	Fragment	663	IRs Polymer2	VLDPE	Low Density PolyethyleneFilm
254	UV042821HA04	6	Fragment	664	T-Polymer2	PC	Polycarbonate(PC) Transmission(Microscope)
255	UV042821HA04	8	Fragment	664	IRs Polymer2	PC	Polycarbonate/CD-ROMATR/diamond ATRcorrected
256	DR041120HR01	9	Fragment	666	T-Polymer2	PC	Polycarbonate(PC) Transmission(Microscope)
257	UV042821HA05	19	Fragment	667	T-Polymer2	PC	Polycarbonate(PC) Transmission(Microscope)
258	UV042821HA12	16	Fragment	669	T-Polymer2	PC	Polycarbonate(PC) Transmission(Microscope)
259	UV042821HA46	15	Fragment	669	T-Polymer2	PC	Polycarbonate(PC) Transmission(Microscope)
260	UV042821HA04	17	Fragment	677	ATR-Polymer2	D_PC	Polycarbonate(PC) DuraSamplIR-II
261	UV042821HA48	14	Fragment	681	T-Polymer2	Polyacetylene	Polyacetylene Transmission(Microscope)
262	UV042821HA12	9	Fragment	682	ATR-Polymer2	D_PC	Polycarbonate(PC) DuraSamplIR-II
263	UV042821HA48	6	Fragment	687	IRs Polymer2	NYLON11	Nylon 11 [-NH(CH2)10CO-]nFilm
264	UV042821HA22	3	Fragment	690	ATR-Polymer2	D_PC	Polycarbonate(PC) DuraSamplIR-II
265	UV042821HA22	7	Fragment	692	IRs Polymer2	LANOLINE	LanolineFilm
266	UV042821HA34	5	Fragment	694	ATR-Polymer2	D_PC	Polycarbonate(PC) DuraSamplIR-II
267	DR041120HE02	7	Fragment	695	ATR-Polymer2	D_PC2	Polycarbonate(PC) DuraSamplIR-II
268	DR041120HG06	5	Fragment	696	T-Polymer2	PC	Polycarbonate(PC) Transmission(Microscope)
269	DR042821HA32	10	fragment	698	ATR-Polymer2	D_PC	Polycarbonate(PC) DuraSamplIR-II
270	UV042821HA04	7	Fragment	702	ATR-Polymer2	D_PC	Polycarbonate(PC) DuraSamplIR-II
271	DR041120HR01	7	Fragment	703	T-Polymer2	PC	Polycarbonate(PC) Transmission(Microscope)
272	DR041120HE02	8	Fragment	708	ATR-Polymer2	D_PC	Polycarbonate(PC) DuraSamplIR-II
273	UV042821HA52	3	Fragment	710	T-Polymer2	PC	Polycarbonate(PC) Transmission(Microscope)
274	UV042821HA05	22	Fragment	718	ATR-Polymer2	D_PC	Polycarbonate(PC) DuraSamplIR-II
275	UV042821HA52	17	Fragment	720	T-Polymer2	T_PC2	Polycarbonate(PC) Transmission(Microscope)
276	DR041120HR01	5	Fragment	729	T-Polymer2	PC	Polycarbonate(PC) Transmission(Microscope)
277	DR041120HT03	1	Fragment	768	T-Polymer2	Soy Bean Powder	Protein(Soy Bean Powder) Transmission(Microscope)
278	UV042821HA48	10	Fragment	787	IRs Polymer2	LDPE	Low Density PolyethyleneFilm
279	DR041120HG06	2	Duplicate
280	UV042821HA04	2	Duplicate
281	UV042821HA05	10	Duplicate

## Sheet: Population Summary Stats
Total Count	278		Fragment	187	Sphere	1
Hit count > 600	125		Film	19	Fiber	71
count	Sample	City Code	Type	Score	Maximum Hits	Type	Abbreviation	Library	City		Count of Abbreviation	Column Labels
278	UV042821HA48	U	Film	787	IRs Polymer2	Low Density Polyethylene Film	LDPE	LDPE	Uvalde		Row Labels	ACR	AMS	ARA	BMC	BR3	DLTDP	EPX	EVA	FEP	HDPE	HLAS	HRB	IIR	LDPE	LS770	MEL	NYL	PA	PAC	PAM	PAP	PAR	PB1	PBT	PC	PCL	PDI	PEEK	PEG	PEI	PEPQ	PES	PET	PETG	PHSI	PI	PIB	PIP
277	DR041120HT03	D	Fragment	768	T-Polymer2	Protein	PLT	Soy Bean Powder	Del Rio		Del Rio	1			1	7		4			1	1	3		1	1		2	3	1	1	1		1	1	39	1		2	4	2	1	1	3			3
276	DR041120HR01	D	Fragment	729	T-Polymer2	Polycarbonate	PC	PC	Del Rio		Uvalde		1	1		7	4	19	1	2	1	1	1	1	2	3	1	2	13	2			2		1	36		1	1	6	1	2	2	1	1	1	8	1	1
275	UV042821HA52	U	Fragment	720	T-Polymer2	Polycarbonate	PC	T_PC2	Uvalde		Grand Total	1	1	1	1	14	4	23	1	2	2	2	4	1	3	4	1	4	16	3	1	1	2	1	2	75	1	1	3	10	3	3	3	4	1	1	11	1	1
274	UV042821HA05	U	Fragment	718	ATR-Polymer2	Polycarbonatephenylene PC	PC	D_PC	Uvalde
273	UV042821HA52	U	Fragment	710	T-Polymer2	Polycarbonate	PC	PC	Uvalde
272	DR041120HE02	D	Fragment	708	ATR-Polymer2	Polycarbonatephenylene PC	PC	D_PC	Del Rio		Count of Abbreviation	Column Labels
271	DR041120HR01	D	Fragment	703	T-Polymer2	Polycarbonate	PC	PC	Del Rio		Row Labels	ACR	BMC	BR3	EPX	HDPE	HLAS	HRB	LDPE	LS770	NYL	PA	PAC	PAM	PAP	PB1	PBT	PC	PCL	PEEK	PEG	PEI	PEPQ	PES	PET	PI	PLT	PP	PPO	PPS	PS	PSO	PUR	PVC	PVDC	PVDF	RUBB	Si	SMA
270	UV042821HA04	U	Fragment	702	ATR-Polymer2	Polycarbonatephenylene PC	PC	D_PC	Uvalde		Del Rio	1	1	7	4	1	1	3	1	1	2	3	1	1	1	1	1	39	1	2	4	2	1	1	3	3	5	1	1	4	2	1	1	2	1	1	2	3	1
269	DR042821HA32	D	Fragment	698	ATR-Polymer2	Polycarbonatephenylene PC	PC	D_PC	Del Rio			1	2	3	4	5	6	7	8	9	10	11	12	13	14	15	16	17	18	19	20	21	22	23	24	25	26	27	28	29	30	31	32	33	34	35	36	37	38
268	DR041120HG06	D	Fragment	696	T-Polymer2	Polycarbonate	PC	PC	Del Rio
267	DR041120HE02	D	Fragment	695	ATR-Polymer2	Polycarbonatephenylene PC	PC	D_PC2	Del Rio
266	UV042821HA34	U	Fragment	694	ATR-Polymer2	Polycarbonatephenylene PC	PC	D_PC	Uvalde
265	UV042821HA22	U	Film	692	IRs Polymer2	Lanoline Film	WOIL	LANOLINE Wool Oil	Uvalde
264	UV042821HA22	U	Fragment	690	ATR-Polymer2	Polycarbonatephenylene PC	PC	D_PC	Uvalde		Count of Abbreviation	Column Labels
263	UV042821HA48	U	Film	687	IRs Polymer2	Nylon	NYL	Nylon	Uvalde		Row Labels	AMS	ARA	BR3	DLTDP	EPX	EVA	FEP	HDPE	HLAS	HRB	IIR	LDPE	LS770	MEL	NYL	PA	PAC	PAR	PBT	PC	PDI	PEEK	PEG	PEI	PEPQ	PES	PET	PETG	PHSI	PI	PIB	PIP	PLT	PMP	POM	PP	PPO	PPP
262	UV042821HA12	U	Fragment	682	ATR-Polymer2	Polycarbonatephenylene PC	PC	D_PC	Uvalde		Uvalde	1	1	7	4	19	1	2	1	1	1	1	2	3	1	2	13	2	2	1	36	1	1	6	1	2	2	1	1	1	8	1	1	1	2	1	3	1	1
261	UV042821HA48	U	Fragment	681	T-Polymer2	Polyacetylene	PAC	Polyacetylene organic polymer	Uvalde			1	2	3	4	5	6	7	8	9	10	11	12	13	14	15	16	17	18	19	20	21	22	23	24	25	26	27	28	29	30	31	32	33	34	35	36	37	38
260	UV042821HA04	U	Fragment	677	ATR-Polymer2	Polycarbonatephenylene PC	PC	D_PC	Uvalde
258	UV042821HA12	U	Fragment	669	T-Polymer2	Polycarbonate	PC	PC	Uvalde
259	UV042821HA46	U	Fragment	669	T-Polymer2	Polycarbonate	PC	PC	Uvalde
257	UV042821HA05	U	Fragment	667	T-Polymer2	Polycarbonate	PC	PC	Uvalde
256	DR041120HR01	D	Fragment	666	T-Polymer2	Polycarbonate	PC	PC	Del Rio
254	UV042821HA04	U	Fragment	664	T-Polymer2	Polycarbonate	PC	PC	Uvalde
255	UV042821HA04	U	Fragment	664	IRs Polymer2	Polycarbonatephenylene ROMATR	PC	PC	Uvalde
253	DR041120HG06	D	Fragment	663	IRs Polymer2	Low Density Polyethylene	LDPE	LDPE	Del Rio
252	UV042821HA04	U	Fragment	660	T-Polymer2	Polycarbonate	PC	PC	Uvalde
251	DR041120HE02	D	Fragment	659	T-Polymer2	Polycarbonate	PC	T_PC2	Del Rio
250	DR041120HR01	D	Fragment	658	T-Polymer2	Paper	PAP	Paper	Del Rio
249	DR041120HT03	D	Fragment	657	IRs Polymer2	Polycarbonatephenylene ROMATR	PC	PC	Del Rio
247	DR041120HR01	D	Fiber	656	T-Polymer2	Polycarbonate	PC	T_PC2	Del Rio
248	DR041120HT03	D	Fragment	656	IRs Polymer2	Nylon	NYL	Nylon	Del Rio
246	UV042821HA04	U	Fragment	654	T-Polymer2	Polycarbonate	PC	PC	Uvalde
245	UV042821HA04	U	Fragment	652	T-Polymer2	Ramie	PLT	RAMIE Plant Fiber Organic	Uvalde
244	DR041120HM01	D	Fragment	651	T-Polymer2	Polycarbonate	PC	PC	Del Rio
243	DR041120HG02	D	Fragment	649	T-Polymer2	Polycarbonate	PC	T_PC2	Del Rio
241	DR041120HG06	D	Fragment	647	T-Polymer2	Polycarbonate	PC	PC	Del Rio
242	DR041120HR01	D	Fragment	647	ATR-Polymer2	Polycarbonatephenylene PC	PC	D_PC	Del Rio
239	DR041120HJ03	D	Fragment	645	ATR-Polymer2	Polycarbonatephenylene PC	PC	D_PC	Del Rio
240	DR041120HT03	D	Fragment	645	ATR-Polymer2	Polycarbonatephenylene PC	PC	D_PC	Del Rio
236	DR041120HE02	D	Fragment	644	T-Polymer2	Polycarbonate	PC	PC	Del Rio
237	DR041120HG06	D	Fragment	644	ATR-Polymer2	Polycarbonatephenylene PC	PC	D_PC	Del Rio
238	DR041120HG06	D	Fragment	644	ATR-Polymer2	Polycarbonatephenylene PC	PC	D_PC	Del Rio
235	UV042821HA04	D	Fragment	642	T-Polymer2	Polycarbonate	PC	PC	Del Rio
233	DR041120HT03	U	Fragment	641	T-Polymer2	Polyacetylene	PAC	Polyacetylene	Uvalde
234	UV042821HA04	U	Fragment	641	ATR-Polymer2	Polycarbonatephenylene PC	PC	D_PC	Uvalde
231	UV042821HA31	U	Fragment	640	T-Polymer2	Polycarbonate	PC	PC	Uvalde
232	UV042821HA52	U	Fragment	640	T-Polymer2	Polycarbonate	PC	PC	Uvalde		Uvalde Hailstones Summary Statistics
230	DR041120HT03	D	Fragment	638	T-Polymer2	Polycarbonate	PC	PC	Del Rio		Average (mean)	611.464
227	UV042821HA04	U	Fragment	637	T-Polymer2	Polycarbonate	PC	PC	Uvalde		Standard Deviation (std)	37.0497
228	UV042821HA04	U	Fragment	637	T-Polymer2	Polycarbonate	PC	PC	Uvalde		Count	112
229	UV042821HA52	U	Fragment	637	ATR-Polymer2	Epoxy	EPX	Epoxy	Uvalde		Maximum	768
226	UV042821HA12	U	Fragment	636	ATR-Polymer2	Polycarbonatephenylene PC	PC	D_PC	Uvalde		Minimum	569
224	DR042821HA32	D	Fragment	635	T-Polymer2	Phenoxy	HRB	Herbicide	Del Rio
225	DR041120HE02	D	Fragment	635	T-Polymer2	Polycarbonate	PC	PC	Del Rio
223	UV042821HA04	U	Fragment	634	T-Polymer2	Tetrafluoroethylene	FEP	FEP	Uvalde
220	DR042821HA32	D	Fragment	632	ATR-Polymer2	Polycarbonate	PC	D_PC	Del Rio		Uvalde Hailstones Summary Statistics
221	DR041120HR01	D	Fragment	632	T-Polymer2	Polycarbonate	PC	PC	Del Rio		Average (mean)	607.392
222	UV042821HA11	U	Fragment	632	ATR-Polymer2	Polyphenylene Sulfide	PPS	D_PPS2	Uvalde		Standard Deviation (std)	35.282
218	UV042821HA04	U	Fragment	629	T-Polymer2	Polycarbonate	PC	PC	Uvalde		Count	166
219	UV042821HA31	U	Fragment	629	T-Polymer2	Polycarbonate	PC	PC	Uvalde		Maximum	787
215	DR041120HM01	D	Fragment	628	ATR-Polymer2	Polycarbonate	PC	D_PC	Del Rio		Minimum	564
216	UV042821HA31	U	Fragment	628	ATR-Polymer2	Epoxy	EPX	Epoxy	Uvalde
217	UV042821HA48	U	Fragment	628	T-Polymer2	Epoxy	EPX	Epoxy	Uvalde
213	DR042821HA32	D	Fragment	626	ATR-Polymer2	Epoxy	EPX	Epoxy	Del Rio
214	DR041120HM01	D	Fragment	626	ATR-Polymer2	Polyvinylchloride	PVC	D_PVC with PhenoricSulfonicEster	Del Rio		Both Hail Events Summary Statistics
212	DR042821HA32	D	Fragment	625	T-Polymer2	Polycarbonate	PC	PC	Del Rio
211	UV042821HA22	U	Fragment	624	T-Polymer2	Polycarbonate	PC	PC	Uvalde		Mean	609.032
210	UV042821HA52	U	Fragment	622	T-Polymer2	Polycarbonate	PC	PC	Uvalde		Standard Error	2.16663
208	DR041120HE02	D	Fragment	621	T-Polymer2	Silicon	Si	Silicon Grease	Del Rio		Median	596.5
209	DR041120HR01	D	Fragment	621	IRs Polymer2	Polycarbonate	PC	PC	Del Rio		Mode	590
204	DR041120HG02	D	Fragment	619	T-Polymer2	Polycarbonate	PC	T_PC2	Del Rio		Standard Deviation	36.125
205	UV042821HA04	U	Fragment	619	IRs Polymer2	Melamin	MEL	MELAMIN	Uvalde		Sample Variance	1305.01
206	UV042821HA22	U	Fragment	619	ATR-Polymer2	Polycarbonate	PC	D_PC	Uvalde		Kurtosis	3.79376
207	UV042821HA52	U	Fragment	619	ATR-Polymer2	Polycarbonate	PC	D_PC	Uvalde		Skewness	1.79933
202	DR041120HR01	D	Fragment	618	T-Polymer2	Polycarbonate	PC	PC	Del Rio		Range	223
203	DR041120HT03	D	Fragment	618	T-Polymer2	Polyphenylene Sulfide	PPS	PPS	Del Rio		Minimum	564
200	UV042821HA48	U	Fragment	617	T-Polymer2	Polyvinylchloride	PVC	T_PVC with PhenoricSulfonicEster	Uvalde		Maximum	787
201	UV042821HA48	U	Fragment	617	ATR-Polymer2	Polycarbonate	PC	D_PC	Uvalde		Sum	169311
199	UV042821HA46	U	Fragment	616	ATR-Polymer2	Polycarbonate	PC	D_PC	Uvalde		Count	278
197	DR041120HM01	D	Fragment	615	ATR-Polymer2	Polyphenylene Sulfide	PPS	D_PPS2	Del Rio
198	DR041120HR01	D	Fragment	615	T-Polymer2	Polycarbonate	PC	T_PC2	Del Rio
196	UV042821HA22	U	Fragment	614	ATR-Polymer2	Polycarbonate	PC	D_PC-PBT	Uvalde
193	DR042821HA32	D	Fragment	613	T-Polymer2	Polycarbonate	PC	PC	Del Rio		Row Labels	Average of Score	StdDevp of Score
194	UV042821HA12	U	Fragment	613	ATR-Polymer2	Chimassorb 944LD	HLAS	Chimassorb 944LD	Uvalde		Del Rio	611.464	37.0497
195	UV042821HA34	U	Fragment	613	ATR-Polymer2	Epoxy	EPX	Epoxy	Uvalde		ACR	578	0
192	UV042821HA11	U	Fragment	612	ATR-Polymer2	Epoxy	EPX	Epoxy	Uvalde		BMC	577	0
191	DR041120HG06	D	Fragment	611	T-Polymer2	Polybutadiene	BR3	T_1_2_Polybutadiene	Del Rio		BR3	592.714	12.6572
190	UV042821HA05	U	Fragment	609	IRs Polymer2	Tetrakis(2,4-di-tert-butylphenyl) (1,1-biphenyl)-4,4'-diylbisphosphonite	PEPQ	P-EPQ	Uvalde		EPX	592.5	20.1804
188	UV042821HA12	U	Fragment	608	ATR-Polymer2	Polyvinylchloride	PVC	D_PVC with PhthalicEster 1	Uvalde		HDPE	570	0
189	UV042821HA34	U	Film	608	IRs Polymer2	SBS Film	SBS	SBS	Uvalde		HLAS	595	0
185	DR041120HG06	D	Fragment	607	T-Polymer2	Polyacetylene	PAC	Polyacetylene	Del Rio		HRB	605.333	22.6618
186	DR041120HM01	D	Fragment	607	ATR-Polymer2	Polysulfone	PSO	D_Polysulfone	Del Rio		LDPE	663	0
187	UV042821HA05	U	Fiber	607	ATR-Polymer2	Polyphenylene Sulfide	PPS	D_PPS	Uvalde		LS770	582	0
178	DR041120HE02	D	Fragment	606	ATR-Polymer2	Polybutadiene	BR3	D_1_2_Polybutadiene	Del Rio		NYL	618	38
179	UV042821HA04	U	Fragment	606	ATR-Polymer2	Polybutene ATR	PIB	D_Polybutene	Uvalde		PA	586	5.09902
180	UV042821HA22	U	Film	606	IRs Polymer2	Polyphenylene Sulfide	PPS	PPS	Uvalde		PAC	607	0
181	UV042821HA22	U	Fragment	606	T-Polymer2	Irganox 1076	PA	Phenolic Antioxidant	Uvalde		PAM	581	0
182	UV042821HA31	U	Fragment	606	ATR-Polymer2	D_Polyisoprene_Chlorinated	RUBB	D_Polyisoprene_Chlorinated	Uvalde		PAP	658	0
183	UV042821HA34	U	Fragment	606	ATR-Polymer2	trans-Polyisoprene Rubber	RUBB	D_IR-trans	Uvalde		PB1	586	0
184	UV042821HA46	U	Fragment	606	IRs Polymer2	Polyethylene glycol	PEG	PETG	Uvalde		PBT	598	0
174	DR041120HG02	D	Fragment	605	IRs Polymer2	Silicone	Si	SILICO2	Del Rio		PC	640	35.0575
175	UV042821HA05	U	Fiber	605	ATR-Polymer2	Polyetherimide	PEI	D_PEI	Uvalde		PCL	580	0
176	UV042821HA31	U	Fragment	605	T-Polymer2	Polyphenylene Sulfide	PPS	PPS	Uvalde		PEEK	585	16
177	UV042821HA48	U	Fragment	605	ATR-Polymer2	Polycarbonate	PC	D_PC	Uvalde		PEG	589.75	9.22971
173	UV042821HA46	U	Fragment	604	T-Polymer2	Irganox MD1024	PA	Phenolic Antioxidant	Uvalde		PEI	591.5	0.5
167	DR042821HA32	D	Fragment	603	ATR-Polymer2	Polycarbonate	PC	D_PC-PBT	Del Rio		PEPQ	591	0
168	DR041120HG06	D	Fragment	603	ATR-Polymer2	Polycarbonate	PC	D_PC	Del Rio		PES	596	0
169	DR041120HR01	D	Fragment	603	ATR-Polymer2	Polycarbonate	PC	D_PC	Del Rio		PET	588.667	8.17856
170	UV042821HA22	U	Fragment	603	T-Polymer2	Epoxy	EPX	Epoxy	Uvalde		PI	582	9.89949
171	UV042821HA22	U	Fiber	603	ATR-Polymer2	Polybutadiene	BR3	High trans Polybutadiene	Uvalde		PLT	628.2	70.2521
172	UV042821HA48	U	Fragment	603	T-Polymer2	Polyarylate	PAR	PAR	Uvalde		PP	589	0
163	DR041120HR01	D	Fragment	602	ATR-Polymer2	Cellulose	PLT	D_Cellulose5 Plant	Del Rio		PPO	591	0
164	UV042821HA11	U	Fragment	602	T-Polymer2	Epoxy	EPX	Epoxy	Uvalde		PPS	601.5	15.2398
165	UV042821HA31	U	Fragment	602	T-Polymer2	Phenoxy	HRB	Herbicide	Uvalde		PS	572.5	2.5
166	UV042821HA46	U	Fragment	602	ATR-Polymer2	Polyimide	PI	D_PI1	Uvalde		PSO	607	0
160	DR041120HG02	D	Film	601	IRs Polymer2	PEEK Film	PEEK	PEEK	Del Rio		PUR	575	0
161	DR041120HG06	D	Fragment	601	T-Polymer2	Phenoxy	HRB	Herbicide	Del Rio		PVC	610.5	15.5
162	UV042821HA31	U	Fragment	601	ATR-Polymer2	Polimide	PI	D_PI2	Uvalde		PVDC	595	0
154	DR041120HG02	D	Fragment	600	IRs Polymer2	POLYETHYLENE	PEG	PETG-20	Del Rio		PVDF	585	0
155	UV042821HA12	U	Fragment	600	ATR-Polymer2	Sanol LS770	LS770	D_Additive6	Uvalde		RUBB	583	3
156	UV042821HA12	U	Fragment	600	ATR-Polymer2	Polyethylene glycol	PEG	D_Polyethyleneglycol	Uvalde		Si	605	13.0639
157	UV042821HA31	U	Fragment	600	T-Polymer2	Epoxy	EPX	Epoxy	Uvalde		SMA	591	0
158	UV042821HA34	U	Fragment	600	ATR-Polymer2	Irganox 1330	PA	Phenolic Antioxidant	Uvalde		STR	582	0
159	UV042821HA46	U	Film	600	IRs Polymer2	Polystyrene	PS	PS1	Uvalde		Uvalde	607.392	35.282
148	DR042821HA32	D	Fragment	599	IRs Polymer2	Ramie	PLT	RAMIE Plant Fiber Organic	Del Rio		AMS	596	0
149	DR041120HJ28	D	Film	599	T-Polymer2	Polyester	PET	Polyester	Del Rio		ARA	593	0
150	UV042821HA12	U	Fragment	599	T-Polymer2	Epoxy	EPX	Epoxy	Uvalde		BR3	593.571	6.82134
151	UV042821HA12	U	Film	599	IRs Polymer2	Polyphenylene Sulfide	PPS	PPS	Uvalde		DLTDP	592.5	2.87228
152	UV042821HA22	U	Fragment	599	T-Polymer2	Polyethylene	HDPE	T_HDPE	Uvalde		EPX	601.526	15.257
153	UV042821HA48	U	Fragment	599	T-Polymer2	Epoxy	EPX	Epoxy	Uvalde		EVA	590	0
142	DR042821HA32	D	Fiber	598	IRs Polymer2	Polybutene ATR	PBT	PB	Del Rio		FEP	612	22
143	DR041120HG02	D	Fragment	598	ATR-Polymer2	Polycarbonate	PC	D_PC2	Del Rio		HDPE	599	0
144	UV042821HA05	U	Fiber	598	ATR-Polymer2	Irganox 1330	PA	Phenolic Antioxidant	Uvalde		HLAS	613	0
145	UV042821HA12	U	Fragment	598	T-Polymer2	Polyphenylene Sulfide	PPS	PPS	Uvalde		HRB	602	0
146	UV042821HA31	U	Fragment	598	T-Polymer2	Polybutadiene	BR3	T_1_2_Polybutadiene	Uvalde		IIR	587	0
147	UV042821HA46	U	Fragment	598	ATR-Polymer2	Polybutadiene	BR3	High cis Polybutadiene	Uvalde		LDPE	686.5	100.5
140	UV042821HA31	U	Fragment	597	IRs Polymer2	DLTDPANTIOXIDANT	DLTDP	DLTDP	Uvalde		LS770	581	14.7648
141	UV042821HA34	U	Fragment	597	ATR-Polymer2	Polyoxymethylene	POM	Polyacetal	Uvalde		MEL	619	0
135	DR041120HE02	D	Fragment	596	IRs Polymer2	POLYETHYLENE	PEG	PETG-20	Del Rio		NYL	634	53
136	DR041120HG06	D	Fiber	596	ATR-Polymer2	Polyethersulfone	PES	D_PES	Del Rio		PA	590.538	9.70024
137	UV042821HA05	U	Fiber	596	ATR-Polymer2	D_Poly_alpha_Methylstyrene	AMS	D_Poly_alpha_Methylstyrene	Uvalde		PAC	661	20
138	UV042821HA52	U	Fragment	596	ATR-Polymer2	Polymethylpentene	PMP	D_Poly_4_Methyl_1_Pentene	Uvalde		PAR	592	11
139	UV042821HA52	U	Fragment	596	T-Polymer2	Polybutadiene	BR3	T_1_2_Polybutadiene	Uvalde		PBT	577	0
128	DR041120HM01	D	Fragment	595	IRs Polymer2	Chimassorb 944LD	HLAS	Chimassorb 944LD	Del Rio		PC	644.972	37.2383
129	DR041120HT03	D	Fragment	595	ATR-Polymer2	Polyvinylchloried	PVC	D_PVC with TerephthalicEster	Del Rio		PDI	580	0
130	DR041120HT03	D	Fragment	595	IRs Polymer2	PVDC	PVDC	PVDC	Del Rio		PEEK	570	0
131	UV042821HA12	U	Fragment	595	T-Polymer2	Irganox 1330	PA	Phenolic Antioxidant	Uvalde		PEG	591	10.1325
132	UV042821HA31	U	Fragment	595	IRs Polymer2	Irganox MD1024	PA	Phenolic Antioxidant	Uvalde		PEI	605	0
133	UV042821HA46	U	Fragment	595	T-Polymer2	Epoxy	EPX	Epoxy	Uvalde		PEPQ	594.5	14.5
134	UV042821HA48	U	Fragment	595	T-Polymer2	Epoxy	EPX	Epoxy	Uvalde		PES	570	4
125	DR041120HM01	D	Fiber	594	T-Polymer2	Polybutadiene	BR3	T_1_2_Polybutadiene	Del Rio		PET	580	0
126	UV042821HA52	U	Fragment	594	T-Polymer2	Polycarbonate	PC	T_PC2	Uvalde		PETG	581	0
127	UV042821HA52	U	Fragment	594	T-Polymer2	Epoxy	EPX	Epoxy	Uvalde		PHSI	582	0
119	DR042821HA32	D	Fiber	593	ATR-Polymer2	Polyimide	PI	D_PI1	Del Rio		PI	588.25	10.4493
120	DR041120HR01	D	Fiber	593	IRs Polymer2	Polybutadiene	BR3	BR3	Del Rio		PIB	606	0
121	UV042821HA04	U	Fragment	593	T-Polymer2	Epoxy	EPX	Epoxy	Uvalde		PIP	581	0
122	UV042821HA46	U	Fragment	593	ATR-Polymer2	Aramid	ARA	D_Aramid	Uvalde		PLT	652	0
123	UV042821HA48	U	Fragment	593	T-Polymer2	Polycarbonate	PC	PC	Uvalde		PMP	591.5	4.5
124	UV042821HA52	U	Fragment	593	IRs Polymer2	DLTDPANTIOXIDANT	DLTDP	DLTDP	Uvalde		POM	597	0
113	DR041120HE02	D	Film	592	IRs Polymer2	Polyetherimide	PEI	PEI	Del Rio		PP	579.333	6.01849
114	DR041120HG06	D	Fragment	592	T-Polymer2	Polycarbonate	PC	PC	Del Rio		PPO	591	0
115	UV042821HA05	U	Fiber	592	T-Polymer2	Polyimide	PI	PI	Uvalde		PPP	579	0
116	UV042821HA12	U	Fragment	592	ATR-Polymer2	Polyvinylindene Flouride	PVDF	D_PVDF	Uvalde		PPS	599.444	15.4064
117	UV042821HA12	U	Fragment	592	ATR-Polymer2	Polyimide	PI	D_PI1	Uvalde		PS	585	10.2713
118	UV042821HA34	U	Fiber	592	IRs Polymer2	POLYETHYLENE	PEG	PETG-20	Uvalde		PSO	586	0
104	DR041120HJ03	D	Fiber	591	ATR-Polymer2	Styrene Maleic Anhydride	SMA	D_Styrene_Maleic_Anhydride	Del Rio		PTFE2	578	0
105	DR041120HJ03	D	Film	591	IRs Polymer2	Polyetherimide	PEI	PEI	Del Rio		PVC	595.8	14.4416
106	DR041120HJ28	D	Fiber	591	IRs Polymer2	Tetrakis(2,4-di-tert-butylphenyl) (1,1-biphenyl)-4,4'-diylbisphosphonite	PEPQ	P-EPQ	Del Rio		PVDF	587.5	4.5
107	DR041120HM01	D	Fragment	591	ATR-Polymer2	Irganox MD 1024	PA	Phenolic Antioxidant	Del Rio		RUBB	591.75	14.2544
108	DR041120HR01	D	Fiber	591	ATR-Polymer2	Polyethylene Oxide	PPO	D_PolyethyleneOxide	Del Rio		SB	589	0
109	UV042821HA34	U	Fragment	591	T-Polymer2	Epoxy	EPX	Epoxy	Uvalde		SBS	608	0
110	UV042821HA46	U	Fragment	591	ATR-Polymer2	Polyphenylene Oxide	PPO	D_PPO-PA	Uvalde		Si	572	0
111	UV042821HA46	U	Fragment	591	T-Polymer2	Epoxy	EPX	Epoxy	Uvalde		WOIL	692	0
112	UV042821HA48	U	Fragment	591	ATR-Polymer2	Polyvinylchloride	PVC	D_PVC_Carboxylated	Uvalde		Grand Total	609.032	36.0599
93	DR042821HA32	D	Film	590	IRs Polymer2	Polyphenylene Sulfide	PPS	PPS	Del Rio
94	DR041120HG02	D	Fiber	590	IRs Polymer2	Ramie	PLT	RAMIE Plant Fiber Organic	Del Rio
95	DR041120HG06	D	Fragment	590	T-Polymer2	Polycarbonate	PC	PC	Del Rio
96	UV042821HA05	U	Fiber	590	IRs Polymer2	DLTDPANTIOXIDANT	DLTDP	DLTDP	Uvalde
97	UV042821HA05	U	Fiber	590	IRs Polymer2	DLTDPANTIOXIDANT	DLTDP	DLTDP	Uvalde
98	UV042821HA11	U	Film	590	IRs Polymer2	Polyphenylene Sulfide	PPS	PPS	Uvalde
99	UV042821HA31	U	Fragment	590	IRs Polymer2	Polycarbonate	PC	PC	Uvalde
100	UV042821HA34	U	Fragment	590	T-Polymer2	Ethylene Vinyl Acetate	EVA	T_EVA-6	Uvalde
101	UV042821HA52	U	Fragment	590	IRs Polymer2	Tetrafluoroethylene	FEP	FEP	Uvalde
102	UV042821HA52	U	Fragment	590	IRs Polymer2	Polyimide	PI	PI1	Uvalde
103	UV042821HA52	U	Fiber	590	T-Polymer2	Polybutadiene	BR3	High-trans Polybutadiene	Uvalde
85	DR041120HG02	D	Sphere	589	T-Polymer2	Silicon	Si	Silicon Grease	Del Rio
86	DR041120HJ03	D	Fiber	589	IRs Polymer2	Polybutadiene	BR3	BR3	Del Rio
87	DR041120HR01	D	Fiber	589	T-Polymer2	Polypropylene	PP	PP	Del Rio
88	UV042821HA22	U	Fiber	589	ATR-Polymer2	Polyethylene Oxide	PEG	D_PolyethyleneOxide	Uvalde
89	UV042821HA22	U	Fiber	589	ATR-Polymer2	Styrene Butadiene	SB	D_SB	Uvalde
90	UV042821HA22	U	Fragment	589	ATR-Polymer2	Butadiene	BR3	High-trans Polybutadiene	Uvalde
91	UV042821HA52	U	Fragment	589	T-Polymer2	Polycarbonate	PC	PC	Uvalde
92	UV042821HA52	U	Fragment	589	IRs Polymer2	Polystyrene	PS	PS	Uvalde
79	DR041120HG06	D	Fragment	588	ATR-Polymer2	Polycarbonate	PC	D_PC2	Del Rio
80	DR041120HM01	D	Fiber	588	ATR-Polymer2	Polyester	PET	D_Polyester4	Del Rio
81	DR041120HT03	D	Fragment	588	T-Polymer2	Irganox 1330	PA	Phenolic Antioxidant	Del Rio
82	UV042821HA05	U	Fiber	588	ATR-Polymer2	Polycarbonate	PC	D_PC-PBT	Uvalde
83	UV042821HA05	U	Fragment	588	ATR-Polymer2	Epoxy	EPX	Epoxy	Uvalde
84	UV042821HA31	U	Fragment	588	ATR-Polymer2	Irganox 1330	PA	Phenolic Antioxidant	Uvalde
73	DR041120HJ03	D	Fragment	587	T-Polymer2	Polyethylene	PEG	PEG	Del Rio
74	DR041120HM01	D	Fragment	587	T-Polymer2	Epoxy	EPX	Epoxy	Del Rio
75	DR041120HR01	D	Fiber	587	T-Polymer2	Polybutadiene	BR3	T_1_2_Polybutadiene	Del Rio
76	UV042821HA05	U	Fragment	587	ATR-Polymer2	Irganox MD1024	PA	Phenolic Antioxidant	Uvalde
77	UV042821HA31	U	Fragment	587	ATR-Polymer2	Polymethylpentene	PMP	D_Poly_4_Methyl_1_Pentene	Uvalde
78	UV042821HA34	U	Fragment	587	ATR-Polymer2	IIR	IIR	D_IIR Rubber	Uvalde
68	DR041120HG02	D	Fiber	586	ATR-Polymer2	Poly (1-Butene)	PB1	D_Poly_1_Butene	Del Rio
69	DR041120HG06	D	Fiber	586	IRs Polymer2	Butyl Rubber	RUBB	BUTYL_RB	Del Rio
70	UV042821HA05	U	Film	586	IRs Polymer2	Low	LDPE	LLDPE1	Uvalde
71	UV042821HA11	U	Fragment	586	ATR-Polymer2	Irganox 1076	PA	Phenolic Antioxidant	Uvalde
72	UV042821HA34	U	Fragment	586	ATR-Polymer2	Polysulfone	PSO	D_Polysulfone	Uvalde
64	DR042821HA32	D	Fiber	585	T-Polymer2	Epoxy	EPX	Epoxy	Del Rio
65	DR041120HG06	D	Fiber	585	ATR-Polymer2	Polyvinylindene Flouride	PVDF	D_PVDF	Del Rio
66	UV042821HA46	U	Fragment	585	ATR-Polymer2	polypropylene	PP	D_PP_Chlorinated	Uvalde
67	UV042821HA48	U	Fragment	585	IRs Polymer2	Irganox MD1024	PA	Phenolic Antioxidant	Uvalde
61	DR041120HG06	D	Fiber	584	ATR-Polymer2	Polyimide	PI	D_PI3	Del Rio
62	UV042821HA04	U	Fiber	584	ATR-Polymer2	Polyethylene glycol	PEG	D_Polyethyleneglycol	Uvalde
63	UV042821HA46	U	Fiber	584	IRs Polymer2	Polyvinylchloride	PVC	PVDC	Uvalde
58	DR041120HR01	D	Fiber	583	ATR-Polymer2	Polyphenlene Sulfide	PPS	D_PPS2	Del Rio
59	UV042821HA12	U	Fragment	583	T-Polymer2	Polyvinylindene Flouride	PVDF	PVDF	Uvalde
60	UV042821HA31	U	Fiber	583	ATR-Polymer2	Irganox 1010	PA	Phenolic Antioxidant	Uvalde
51	DR041120HG06	D	Fragment	582	ATR-Polymer2	Polyamide	PLT	D_Polyamide6 wool & Silk I call in Plant	Del Rio
52	DR041120HG06	D	Fragment	582	T-Polymer2	Styrene	STR	Styrene-Ethylene-Butylene	Del Rio
53	DR041120HJ03	D	Fragment	582	IRs Polymer2	Sanol LS770	LS770	SanolLS770	Del Rio
54	DR041120HJ28	D	Fiber	582	T-Polymer2	Polycarbonate	PC	PC	Del Rio
55	UV042821HA05	U	Fiber	582	ATR-Polymer2	Polyphenylene sulfide	PPS	D_PPS	Uvalde
56	UV042821HA05	U	Fragment	582	IRs Polymer2	Phenylsilicone	PHSI	PHSI	Uvalde
57	UV042821HA31	U	Film	582	IRs Polymer2	Polypropylene	PP	PP	Uvalde
43	DR042821HA32	D	Fragment	581	ATR-Polymer2	Polyalpha Methylstyrene	PAM	D_Poly_alpha_Methylstyrene	Del Rio
44	UV042821HA04	U	Fiber	581	ATR-Polymer2	Polybutadiene	BR3	D_1_2_Polybutadiene Synthetic Rubber	Uvalde
45	UV042821HA11	U	Fragment	581	IRs Polymer2	Polyisoprene	PIP	PIP	Uvalde
46	UV042821HA12	U	Fragment	581	T-Polymer2	Epoxy	EPX	Epoxy	Uvalde
47	UV042821HA12	U	Fragment	581	T-Polymer2	Polyarylate	PAR	PAR	Uvalde
48	UV042821HA34	U	Fragment	581	IRs Polymer2	Polyethylene Glycol	PETG	PETG	Uvalde
49	UV042821HA46	U	Fragment	581	ATR-Polymer2	Polyimide	PI	D_PI4	Uvalde
50	UV042821HA52	U	Fiber	581	ATR-Polymer2	Nylon	NYL	Nylon	Uvalde
35	DR041120HG06	D	Fiber	580	ATR-Polymer2	Polyisoprene Rubber	RUBB	D_IR-cis	Del Rio
36	DR041120HG06	D	Fragment	580	T-Polymer2	Phenoxy	HRB	Herbicide	Del Rio
37	DR041120HJ03	D	Fragment	580	IRs Polymer2	Nylon	NYL	Nylon	Del Rio
38	DR041120HT03	D	Fiber	580	ATR-Polymer2	Polycaprolac tone	PCL	D_Polycaprolactone	Del Rio
39	UV042821HA05	U	Fiber	580	T-Polymer2	Epoxy	EPX	Epoxy	Uvalde
40	UV042821HA05	U	Fiber	580	T-Polymer2	Polydiallyl Isophthalate	PDI	T_Polydiallyl_Isophthalate	Uvalde
41	UV042821HA46	U	Film	580	IRs Polymer2	P-EPQANTIOXIDANT PHOSPHONITE	PEPQ	P-EPQ	Uvalde
42	UV042821HA46	U	Fragment	580	ATR-Polymer2	Polyester	PET	D_Polyester2	Uvalde
30	DR041120HM01	D	Fiber	579	T-Polymer2	Polyester	PET	Polyester	Del Rio
31	DR041120HT03	D	Fiber	579	IRs Polymer2	Irganox 1010	PA	Phenolic Antioxidant	Del Rio
32	UV042821HA05	U	Fiber	579	T-Polymer2	Polyphenylene	PPP	PPS	Uvalde
33	UV042821HA05	U	Fiber	579	ATR-Polymer2	Sanol LS770	LS770	Polymer Additive	Uvalde
34	UV042821HA12	U	Fiber	579	T-Polymer2	Polyvinylchloride	PVC	T_PVC with PhenoricSulfonicEster	Uvalde
26	DR041120HR01	D	Fiber	578	T-Polymer2	Acrylic	ACR	Acrylic Adhesive	Del Rio
27	UV042821HA04	U	Fiber	578	ATR-Polymer2	Poly(Tetrafluoroethylene)	PTFE2	D_PTFE2	Uvalde
28	UV042821HA31	U	Fiber	578	ATR-Polymer2	Polyimide	PI	D_PI2	Uvalde
29	UV042821HA31	U	Fragment	578	T-Polymer2	Polyisoprene Rubber	RUBB	IR-trans	Uvalde
22	DR041120HE02	D	Fiber	577	ATR-Polymer2	Butyl Methacrylate	BMC	D_ButylMethacrylate_IsobutylMethacrylate	Del Rio
23	UV042821HA05	U	Fiber	577	IRs Polymer2	Butyl Rubber	RUBB	BUTYL_RB	Uvalde
24	UV042821HA34	U	Fiber	577	IRs Polymer2	Irganox 1330	PA	Phenolic Antioxidant	Uvalde
25	UV042821HA48	U	Fragment	577	T-Polymer2	Polybutylene Terephthalate	PBT	PBT	Uvalde
19	DR041120HE02	D	Fiber	576	ATR-Polymer2	Polyethylene glycol	PEG	D_Polyethyleneglycol	Del Rio
20	UV042821HA11	U	Fiber	576	IRs Polymer2	Polystyrene	PS	PS	Uvalde
21	UV042821HA31	U	Fiber	576	T-Polymer2	Polyphenylene	PPS	PPS	Uvalde
15	DR042821HA32	D	Fiber	575	IRs Polymer2	Polystyrene	PS	PS	Del Rio
16	DR041120HE02	D	Fragment	575	IRs Polymer2	Polyurethane	PUR	URETHAN	Del Rio
17	UV042821HA05	U	Fiber	575	ATR-Polymer2	Polyethylene glycol	PEG	D_Polyethyleneglycol	Uvalde
18	UV042821HA05	U	Fiber	575	IRs Polymer2	Polystyrene	PS	PS	Uvalde
14	UV042821HA52	U	Film	574	IRs Polymer2	Polyethersulfone	PES	PES	Uvalde
13	UV042821HA04	U	Fragment	573	ATR-Polymer2	Irganox 1010	PA	Phenolic Antioxidant	Uvalde
11	DR041120HJ28	D	Fiber	572	IRs Polymer2	Epoxy	EPX	Epoxy	Del Rio
12	UV042821HA34	U	Fiber	572	T-Polymer2	Silicon	Si	Silicon Grease	Uvalde
10	UV042821HA11	U	Film	571	IRs Polymer2	Polypropylene	PP	PP	Uvalde
6	DR041120HJ28	D	Fiber	570	T-Polymer2	Polyethylene	HDPE	T_HDPE	Del Rio
7	DR041120HR01	D	Fiber	570	T-Polymer2	Polystyrene	PS	PS	Del Rio
8	UV042821HA22	U	Fiber	570	ATR-Polymer2	Polyimide	PI	D_PI3	Uvalde
9	UV042821HA48	U	Fiber	570	ATR-Polymer2	Polyetheretherketone	PEEK	D_PEEK	Uvalde
3	DR042821HA32	D	Fiber	569	IRs Polymer2	Polyimide	PI	PI2 (PI)	Del Rio
4	DR041120HG02	D	Fiber	569	T-Polymer2	Polyetheretherketone	PEEK	PEEK	Del Rio
5	DR041120HT03	D	Fiber	569	T-Polymer2	Polybutadiene	BR3	High-trans Polybutadiene	Del Rio
2	UV042821HA46	U	Film	566	IRs Polymer2	Polyethersulfone	PES	PES	Uvalde
1	UV042821HA34	U	Fiber	564	ATR-Polymer2	Sanol LS770	LS770	Polymer Additive	Uvalde
[truncated: 22 more columns]

## Sheet: Boxplot Attempt
Total	0	Fragment
		Film
		Sphere
City	Score	Type	Abbreviation
Uvalde	787	Film	LDPE
Del Rio	768	Fragment	PLT
Del Rio	729	Fragment	PC
Uvalde	720	Fragment	PC
Uvalde	718	Fragment	PC
Uvalde	710	Fragment	PC
Del Rio	708	Fragment	PC
Del Rio	703	Fragment	PC
Uvalde	702	Fragment	PC
Del Rio	698	Fragment	PC
Del Rio	696	Fragment	PC
Del Rio	695	Fragment	PC
Uvalde	694	Fragment	PC
Uvalde	692	Film	WOIL
Uvalde	690	Fragment	PC
Uvalde	687	Film	NYL
Uvalde	682	Fragment	PC
Uvalde	681	Fragment	PAC
Uvalde	677	Fragment	PC
Uvalde	669	Fragment	PC
Uvalde	669	Fragment	PC
Uvalde	667	Fragment	PC
Del Rio	666	Fragment	PC
Uvalde	664	Fragment	PC
Uvalde	664	Fragment	PC
Del Rio	663	Fragment	LDPE
Uvalde	660	Fragment	PC
Del Rio	659	Fragment	PC
Del Rio	658	Fragment	PAP
Del Rio	657	Fragment	PC
Del Rio	656	Fiber	PC
Del Rio	656	Fragment	NYL
Uvalde	654	Fragment	PC
Uvalde	652	Fragment	PLT
Del Rio	651	Fragment	PC
Del Rio	649	Fragment	PC
Del Rio	647	Fragment	PC
Del Rio	647	Fragment	PC
Del Rio	645	Fragment	PC
Del Rio	645	Fragment	PC
Del Rio	644	Fragment	PC
Del Rio	644	Fragment	PC
Del Rio	644	Fragment	PC
Del Rio	642	Fragment	PC
Uvalde	641	Fragment	PAC
Uvalde	641	Fragment	PC
Uvalde	640	Fragment	PC
Uvalde	640	Fragment	PC
Del Rio	638	Fragment	PC
Uvalde	637	Fragment	PC
Uvalde	637	Fragment	PC
Uvalde	637	Fragment	EPX
Uvalde	636	Fragment	PC
Del Rio	635	Fragment	HRB
Del Rio	635	Fragment	PC
Uvalde	634	Fragment	FEP
Del Rio	632	Fragment	PC
Del Rio	632	Fragment	PC
Uvalde	632	Fragment	PPS
Uvalde	629	Fragment	PC
Uvalde	629	Fragment	PC
Del Rio	628	Fragment	PC
Uvalde	628	Fragment	EPX
Uvalde	628	Fragment	EPX
Del Rio	626	Fragment	EPX
Del Rio	626	Fragment	PVC
Del Rio	625	Fragment	PC
Uvalde	624	Fragment	PC
Uvalde	622	Fragment	PC
Del Rio	621	Fragment	Si
Del Rio	621	Fragment	PC
Del Rio	619	Fragment	PC
Uvalde	619	Fragment	MEL
Uvalde	619	Fragment	PC
Uvalde	619	Fragment	PC
Del Rio	618	Fragment	PC
Del Rio	618	Fragment	PPS
Uvalde	617	Fragment	PVC
Uvalde	617	Fragment	PC
Uvalde	616	Fragment	PC
Del Rio	615	Fragment	PPS
Del Rio	615	Fragment	PC
Uvalde	614	Fragment	PC
Del Rio	613	Fragment	PC
Uvalde	613	Fragment	HLAS
Uvalde	613	Fragment	EPX
Uvalde	612	Fragment	EPX
Del Rio	611	Fragment	BR3
Uvalde	609	Fragment	PEPQ
Uvalde	608	Fragment	PVC
Uvalde	608	Film	SBS
Del Rio	607	Fragment	PAC
Del Rio	607	Fragment	PSO
Uvalde	607	Fiber	PPS
Del Rio	606	Fragment	BR3
Uvalde	606	Fragment	PIB
Uvalde	606	Film	PPS
Uvalde	606	Fragment	PA
Uvalde	606	Fragment	RUBB
Uvalde	606	Fragment	RUBB
Uvalde	606	Fragment	PEG
Del Rio	605	Fragment	Si
Uvalde	605	Fiber	PEI
Uvalde	605	Fragment	PPS
Uvalde	605	Fragment	PC
Uvalde	604	Fragment	PA
Del Rio	603	Fragment	PC
Del Rio	603	Fragment	PC
Del Rio	603	Fragment	PC
Uvalde	603	Fragment	EPX
Uvalde	603	Fiber	BR3
Uvalde	603	Fragment	PAR
Del Rio	602	Fragment	PLT
Uvalde	602	Fragment	EPX
Uvalde	602	Fragment	HRB
Uvalde	602	Fragment	PI
Del Rio	601	Film	PEEK
Del Rio	601	Fragment	HRB
Uvalde	601	Fragment	PI
Del Rio	600	Fragment	PEG
Uvalde	600	Fragment	LS770
Uvalde	600	Fragment	PEG
Uvalde	600	Fragment	EPX
Uvalde	600	Fragment	PA
Uvalde	600	Film	PS
Del Rio	599	Fragment	PLT
Del Rio	599	Film	PET
Uvalde	599	Fragment	EPX
Uvalde	599	Film	PPS
Uvalde	599	Fragment	HDPE
Uvalde	599	Fragment	EPX
Del Rio	598	Fiber	PBT
Del Rio	598	Fragment	PC
Uvalde	598	Fiber	PA
Uvalde	598	Fragment	PPS
Uvalde	598	Fragment	BR3
Uvalde	598	Fragment	BR3
Uvalde	597	Fragment	DLTDP
Uvalde	597	Fragment	POM
Del Rio	596	Fragment	PEG
Del Rio	596	Fiber	PES
Uvalde	596	Fiber	AMS
Uvalde	596	Fragment	PMP
Uvalde	596	Fragment	BR3
Del Rio	595	Fragment	HLAS
Del Rio	595	Fragment	PVC
Del Rio	595	Fragment	PVDC
Uvalde	595	Fragment	PA
Uvalde	595	Fragment	PA
Uvalde	595	Fragment	EPX
Uvalde	595	Fragment	EPX
Del Rio	594	Fiber	BR3
Uvalde	594	Fragment	PC
Uvalde	594	Fragment	EPX
Del Rio	593	Fiber	PI
Del Rio	593	Fiber	BR3
Uvalde	593	Fragment	EPX
Uvalde	593	Fragment	ARA
Uvalde	593	Fragment	PC
Uvalde	593	Fragment	DLTDP
Del Rio	592	Film	PEI
Del Rio	592	Fragment	PC
Uvalde	592	Fiber	PI
Uvalde	592	Fragment	PVDF
Uvalde	592	Fragment	PI
Uvalde	592	Fiber	PEG
Del Rio	591	Fiber	SMA
Del Rio	591	Film	PEI
Del Rio	591	Fiber	PEPQ
Del Rio	591	Fragment	PA
Del Rio	591	Fiber	PPO
Uvalde	591	Fragment	EPX
Uvalde	591	Fragment	PPO
Uvalde	591	Fragment	EPX
Uvalde	591	Fragment	PVC
Del Rio	590	Film	PPS
Del Rio	590	Fiber	PLT
Del Rio	590	Fragment	PC
Uvalde	590	Fiber	DLTDP
Uvalde	590	Fiber	DLTDP
Uvalde	590	Film	PPS
Uvalde	590	Fragment	PC
Uvalde	590	Fragment	EVA
Uvalde	590	Fragment	FEP
Uvalde	590	Fragment	PI
Uvalde	590	Fiber	BR3
Del Rio	589	Sphere	Si
Del Rio	589	Fiber	BR3
Del Rio	589	Fiber	PP
Uvalde	589	Fiber	PEG
Uvalde	589	Fiber	SB
Uvalde	589	Fragment	BR3
Uvalde	589	Fragment	PC
Uvalde	589	Fragment	PS
Del Rio	588	Fragment	PC
Del Rio	588	Fiber	PET
Del Rio	588	Fragment	PA
Uvalde	588	Fiber	PC
Uvalde	588	Fragment	EPX
Uvalde	588	Fragment	PA
Del Rio	587	Fragment	PEG
Del Rio	587	Fragment	EPX
Del Rio	587	Fiber	BR3
Uvalde	587	Fragment	PA
Uvalde	587	Fragment	PMP
Uvalde	587	Fragment	IIR
Del Rio	586	Fiber	PB1
Del Rio	586	Fiber	RUBB
Uvalde	586	Film	LDPE
Uvalde	586	Fragment	PA
Uvalde	586	Fragment	PSO
Del Rio	585	Fiber	EPX
Del Rio	585	Fiber	PVDF
Uvalde	585	Fragment	PP
Uvalde	585	Fragment	PA
Del Rio	584	Fiber	PI
Uvalde	584	Fiber	PEG
Uvalde	584	Fiber	PVC
Del Rio	583	Fiber	PPS
Uvalde	583	Fragment	PVDF
Uvalde	583	Fiber	PA
Del Rio	582	Fragment	PLT
Del Rio	582	Fragment	STR
Del Rio	582	Fragment	LS770
Del Rio	582	Fiber	PC
Uvalde	582	Fiber	PPS
Uvalde	582	Fragment	PHSI
Uvalde	582	Film	PP
Del Rio	581	Fragment	PAM
Uvalde	581	Fiber	BR3
Uvalde	581	Fragment	PIP
Uvalde	581	Fragment	EPX
Uvalde	581	Fragment	PAR
Uvalde	581	Fragment	PETG
Uvalde	581	Fragment	PI
Uvalde	581	Fiber	NYL
Del Rio	580	Fiber	RUBB
Del Rio	580	Fragment	HRB
Del Rio	580	Fragment	NYL
Del Rio	580	Fiber	PCL
Uvalde	580	Fiber	EPX
Uvalde	580	Fiber	PDI
Uvalde	580	Film	PEPQ
Uvalde	580	Fragment	PET
Del Rio	579	Fiber	PET
Del Rio	579	Fiber	PA
Uvalde	579	Fiber	PPP
Uvalde	579	Fiber	LS770
Uvalde	579	Fiber	PVC
Del Rio	578	Fiber	ACR
Uvalde	578	Fiber	PTFE2
Uvalde	578	Fiber	PI
Uvalde	578	Fragment	RUBB
Del Rio	577	Fiber	BMC
Uvalde	577	Fiber	RUBB
Uvalde	577	Fiber	PA
Uvalde	577	Fragment	PBT
Del Rio	576	Fiber	PEG
Uvalde	576	Fiber	PS
Uvalde	576	Fiber	PPS
Del Rio	575	Fiber	PS
Del Rio	575	Fragment	PUR
Uvalde	575	Fiber	PEG
Uvalde	575	Fiber	PS
Uvalde	574	Film	PES
Uvalde	573	Fragment	PA
Del Rio	572	Fiber	EPX
Uvalde	572	Fiber	Si
Uvalde	571	Film	PP
Del Rio	570	Fiber	HDPE
Del Rio	570	Fiber	PS
Uvalde	570	Fiber	PI
Uvalde	570	Fiber	PEEK
Del Rio	569	Fiber	PI
Del Rio	569	Fiber	PEEK
Del Rio	569	Fiber	BR3
Uvalde	566	Film	PES
Uvalde	564	Fiber	LS770

## Sheet: Sheet3
Count of Type	Column Labels
Row Labels	Fiber	Film	Fragment	Sphere	Grand Total
Del Rio	35	5	71	1	112
Uvalde	36	14	116		166
Grand Total	71	19	187	1	278

## Sheet: Sheet2
City	Type	Count of Type
Del Rio	Fiber	35
Del Rio	Film	5
Del Rio	Fragment	71
Del Rio	Sphere	1
Uvalde	Fiber	36
Uvalde	Film	14
Uvalde	Fragment	116
		278

## Sheet: Chi Square
		Count of Abbreviation	Column Labels
		Row Labels	ACR	AMS	ARA	BMC	BR3	DLTDP	EPX	EVA	FEP	HDPE	HLAS	HRB	IIR	LDPE	LS770	MEL	NYL	PA	PAC	PAM	PAP	PAR	PB1	PBT	PC	PCL	PDI	PEEK	PEG	PEI	PEPQ	PES	PET	PETG	PHSI	PI	PIB	PIP	PLT	PMP	POM	PP	PPO	PPP	PPS	PS	PSO
		Del Rio	1			1	7		4			1	1	3		1	1		2	3	1	1	1		1	1	39	1		2	4	2	1	1	3			3			5			1	1		4	2	1
		Uvalde		1	1		7	4	19	1	2	1	1	1	1	2	3	1	2	13	2			2		1	36		1	1	6	1	2	2	1	1	1	8	1	1	1	2	1	3	1	1	9	4	1
		Grand Total	1	1	1	1	14	4	23	1	2	2	2	4	1	3	4	1	4	16	3	1	1	2	1	2	75	1	1	3	10	3	3	3	4	1	1	11	1	1	6	2	1	4	2	1	13	6	2
		Observed
			Combined 1	BR3	EPX	Combined 2	PA	Combined 3	PC	Combined 4	PEG	Combined 5	PI	PLT	Combined 6	PPS	PS	PVC	RUBB
		Del Rio	7	7	4	4	3	5	39	6	4	6	3	5	9	4	2	2	2	112
		Uvalde	12	7	19	9	13	5	36	5	6	14	8	1	9	9	4	5	4	166
		Grand Total	19	14	23	13	16	10	75	11	10	20	11	6	18	13	6	7	6	278
		Expected
			Combined 1	BR3	EPX	Combined 2	PA	Combined 3	PC	Combined 4	PEG	Combined 5	PI	PLT	Combined 6	PPS	PS	PVC	RUBB
		Del Rio	7.65468	5.64029	9.26619	5.23741	6.44604	4.02878	30.2158	4.43165	4.02878	8.05755	4.43165	2.41727	7.2518	5.23741	2.41727	2.82014	2.41727	112
		Uvalde	11.3453	8.35971	13.7338	7.76259	9.55396	5.97122	44.7842	6.56835	5.97122	11.9424	6.56835	3.58273	10.7482	7.76259	3.58273	4.17986	3.58273	166
		Grand Total	19	14	23	13	16	10	75	11	10	20	11	6	18	13	6	7	6	278
		Chi Squared
			Combined 1	BR3	EPX	Combined 2	PA	Combined 3	PC	Combined 4	PEG	Combined 5	PI	PLT	Combined 6	PPS	PS	PVC	RUBB
		Del Rio	0.055992	0.327788	2.9929	0.292355	1.84225	0.234134	2.55368	0.555031	0.00020555	0.525411	0.462499	2.75953	0.421441	0.292355	0.0720281	0.238511	0.0720281
		Uvalde	0.0377778	0.221158	2.0193	0.197252	1.24296	0.15797	1.72297	0.374479	0.000138684	0.354494	0.312047	1.86185	0.284346	0.197252	0.0485973	0.160923	0.0485973
		Chi Square Total																		22.9403
		df =	16
		p value =	0.115341
		The result is not significant
[truncated: 13 more columns]

## Sheet: ANOVA Attempt
										Use the filter function
City	Score	Type	Abbreviation				Uvalde	Del Rio		Uvalde	Del Rio		Uvalde	Del Rio
Uvalde	787	Fragment	LDPE				787			787			787	768
Del Rio	768	Fragment	PLT					768		#VALUE!			720	729
Del Rio	729	Fragment	PC					729		#VALUE!			718	708
Uvalde	720	Fragment	PC				720			720			710	703
Uvalde	718	Fragment	PC				718			718			702	698
Uvalde	710	Fragment	PC				710			710			694	696
Del Rio	708	Fragment	PC					708		#VALUE!			692	695
Del Rio	703	Fragment	PC					703		#VALUE!			690	666
Uvalde	702	Fragment	PC				702			702			687	663
Del Rio	698	fragment	PC					698		#VALUE!			682	659
Del Rio	696	Fragment	PC					696		#VALUE!			681	658
Del Rio	695	Fragment	PC					695		#VALUE!			677	657
Uvalde	694	Fragment	PC				694			694			669	656
Uvalde	692	Fragment	WOIL				692			692			669	656
Uvalde	690	Fragment	PC				690			690			667	651
Uvalde	687	Fragment	NYL				687			687			664	649
Uvalde	682	Fragment	PC				682			682			664	647
Uvalde	681	Fragment	PAC				681			681			660	647
Uvalde	677	Fragment	PC				677			677			654	645
Uvalde	669	Fragment	PC				669			669			652	645
Uvalde	669	Fragment	PC				669			669			641	644
Uvalde	667	Fragment	PC				667			667			641	644
Del Rio	666	Fragment	PC					666		#VALUE!			640	644
Uvalde	664	Fragment	PC				664			664			640	642
Uvalde	664	Fragment	PC				664			664			637	638
Del Rio	663	Fragment	LDPE					663		#VALUE!			637	635
Uvalde	660	Fragment	PC				660			660			637	635
Del Rio	659	Fragment	PC					659		#VALUE!			636	632
Del Rio	658	Fragment	PAP					658		#VALUE!			634	632
Del Rio	657	Fragment	PC					657		#VALUE!			632	628
Del Rio	656	Fiber	PC					656		#VALUE!			629	626
Del Rio	656	Fragment	NYL					656		#VALUE!			629	626
Uvalde	654	Fragment	PC				654			654			628	625
Uvalde	652	Fragment	PLT				652			652			628	621
Del Rio	651	Fragment	PC					651		#VALUE!			624	621
Del Rio	649	Fragment	PC					649		#VALUE!			622	619
Del Rio	647	Fragment	PC					647		#VALUE!			619	618
Del Rio	647	Fragment	PC					647		#VALUE!			619	618
Del Rio	645	Fragment	PC					645		#VALUE!			619	615
Del Rio	645	Fragment	PC					645		#VALUE!			617	615
Del Rio	644	Fragment	PC					644		#VALUE!			617	613
Del Rio	644	Fragment	PC					644		#VALUE!			616	611
Del Rio	644	Fragment	PC					644		#VALUE!			614	607
Del Rio	642	Fragment	PC					642		#VALUE!			613	607
Uvalde	641	Fragment	PAC				641			641			613	606
Uvalde	641	Fragment	PC				641			641			612	605
Uvalde	640	Fragment	PC				640			640			609	603
Uvalde	640	Fragment	PC				640			640			608	603
Del Rio	638	Fragment	PC					638		#VALUE!			608	603
Uvalde	637	Fragment	PC				637			637			607	602
Uvalde	637	Fragment	PC				637			637			606	601
Uvalde	637	Fragment	EPX				637			637			606	601
Uvalde	636	Fragment	PC				636			636			606	600
Del Rio	635	fragment	HRB					635		#VALUE!			606	599
Del Rio	635	Fragment	PC					635		#VALUE!			606	599
Uvalde	634	Fragment	FEP				634			634			606	598
Del Rio	632	fragment	PC					632		#VALUE!			605	598
Del Rio	632	Fragment	PC					632		#VALUE!			605	596
Uvalde	632	Fragment	PPS				632			632			605	596
Uvalde	629	Fragment	PC				629			629			604	595
Uvalde	629	Fragment	PC				629			629			603	595
Del Rio	628	Fragment	PC					628		#VALUE!			603	595
Uvalde	628	Fragment	EPX				628			628			603	594
Uvalde	628	Fragment	EPX				628			628			602	593
Del Rio	626	fragment	EPX					626		#VALUE!			602	593
Del Rio	626	Fragment	PVC					626		#VALUE!			602	592
Del Rio	625	fragment	PC					625		#VALUE!			601	592
Uvalde	624	Fragment	PC				624			624			600	591
Uvalde	622	Fragment	PC				622			622			600	591
Del Rio	621	Fragment	Si					621		#VALUE!			600	591
Del Rio	621	Fragment	PC					621		#VALUE!			600	591
Del Rio	619	Fragment	PC					619		#VALUE!			600	591
Uvalde	619	Fragment	MEL				619			619			599	590
Uvalde	619	Fragment	PC				619			619			599	590
Uvalde	619	Fragment	PC				619			619			599	590
Del Rio	618	Fragment	PC					618		#VALUE!			599	589
Del Rio	618	Fragment	PPS					618		#VALUE!			598	589
Uvalde	617	Fragment	PVC				617			617			598	589
Uvalde	617	Fragment	PC				617			617			598	588
Uvalde	616	Fragment	PC				616			616			598	588
Del Rio	615	Fragment	PPS					615		#VALUE!			597	588
Del Rio	615	Fragment	PC					615		#VALUE!			597	587
Uvalde	614	Fragment	PC				614			614			596	587
Del Rio	613	fragment	PC					613		#VALUE!			596	587
Uvalde	613	Fragment	HLAS				613			613			596	586
Uvalde	613	Fragment	EPX				613			613			595	586
Uvalde	612	Fragment	EPX				612			612			595	585
Del Rio	611	Fragment	BR3					611		#VALUE!			595	585
Uvalde	609	Fragment	PEPQ				609			609			595	584
Uvalde	608	Fragment	PVC				608			608			594	583
Uvalde	608	Fragment	SBS				608			608			594	582
Del Rio	607	Fragment	PAC					607		#VALUE!			593	582
Del Rio	607	Fragment	PSO					607		#VALUE!			593	582
Uvalde	607	Fiber	PPS				607			607			593	582
Del Rio	606	Fragment	BR3					606		#VALUE!			593	581
Uvalde	606	Fragment	PIB				606			606			592	580
Uvalde	606	Fiber	PPS				606			606			592	580
Uvalde	606	Fragment	PA				606			606			592	580
Uvalde	606	Fragment	RUBB				606			606			592	580
Uvalde	606	Fragment	RUBB				606			606			591	579
Uvalde	606	Fragment	PEG				606			606			591	579
Del Rio	605	Fragment	Si					605		#VALUE!			591	578
Uvalde	605	Fiber	PEI				605			605			591	577
Uvalde	605	Fragment	PPS				605			605			590	576
Uvalde	605	Fragment	PC				605			605			590	575
Uvalde	604	Fragment	PA				604			604			590	575
Del Rio	603	fragment	PC					603		#VALUE!			590	572
Del Rio	603	Fragment	PC					603		#VALUE!			590	570
Del Rio	603	Fragment	PC					603		#VALUE!			590	570
Uvalde	603	Fragment	EPX				603			603			590	569
Uvalde	603	Fiber	BR3				603			603			590	569
Uvalde	603	Fragment	PAR				603			603			589	569
Del Rio	602	Fragment	PLT					602		#VALUE!			589
Uvalde	602	Fragment	EPX				602			602			589
Uvalde	602	Fragment	HRB				602			602			589
Uvalde	602	Fragment	PI				602			602			589
Del Rio	601	Fragment	PEEK					601		#VALUE!			588
Del Rio	601	Fragment	HRB					601		#VALUE!			588
Uvalde	601	Fragment	PI				601			601			588
Del Rio	600	Fragment	PEG					600		#VALUE!			587
Uvalde	600	Fragment	LS770				600			600			587
Uvalde	600	Fragment	PEG				600			600			587
Uvalde	600	Fragment	EPX				600			600			586
Uvalde	600	Fiber	PA				600			600			586
Uvalde	600	Fragment	PS				600			600			586
Del Rio	599	fragment	PLT					599		#VALUE!			585
Del Rio	599	Fiber	PET					599		#VALUE!			585
Uvalde	599	Fragment	EPX				599			599			584
Uvalde	599	Fiber	PPS				599			599			584
Uvalde	599	Fragment	HDPE				599			599			583
Uvalde	599	Fragment	EPX				599			599			583
Del Rio	598	fiber	PBT					598		#VALUE!			582
Del Rio	598	Fragment	PC					598		#VALUE!			582
Uvalde	598	Fiber	PA				598			598			582
Uvalde	598	Fragment	PPS				598			598			581
Uvalde	598	Fragment	BR3				598			598			581
Uvalde	598	Fragment	BR3				598			598			581
Uvalde	597	Fragment	DLTDP				597			597			581
Uvalde	597	Fragment	POM				597			597			581
Del Rio	596	Fragment	PEG					596		#VALUE!			581
Del Rio	596	Fiber	PES					596		#VALUE!			581
Uvalde	596	Can't see	AMS				596			596			580
Uvalde	596	Fragment	PMP				596			596			580
Uvalde	596	Fragment	BR3				596			596			580
Del Rio	595	Fragment	HLAS					595		#VALUE!			580
Del Rio	595	Fragment	PVC					595		#VALUE!			579
Del Rio	595	Fragment	PVDC					595		#VALUE!			579
Uvalde	595	Fragment	PA				595			595			579
Uvalde	595	Fragment	PA				595			595			578
Uvalde	595	Fragment	EPX				595			595			578
Uvalde	595	Fragment	EPX				595			595			578
Del Rio	594	Fiber	BR3					594		#VALUE!			577
Uvalde	594	Fragment	PC				594			594			577
Uvalde	594	Fragment	EPX				594			594			577
Del Rio	593	fiber	PI					593		#VALUE!			576
Del Rio	593	Fiber	BR3					593		#VALUE!			576
Uvalde	593	Fragment	EPX				593			593			575
Uvalde	593	Fragment	ARA				593			593			575
Uvalde	593	Fragment	PC				593			593			574
Uvalde	593	Fragment	DLTDP				593			593			573
Del Rio	592	Fragment	PEI					592		#VALUE!			572
Del Rio	592	Fragment	PC					592		#VALUE!			571
Uvalde	592	Fiber	PI				592			592			570
Uvalde	592	Fragment	PVDF				592			592			570
Uvalde	592	Fragment	PI				592			592			566
Uvalde	592	Fiber	PEG				592			592			564
Del Rio	591	Fiber	SMA					591		#VALUE!			100827	68484	169311
Del Rio	591	Fragment	PEI					591		#VALUE!
Del Rio	591	Fiber	PEPQ					591		#VALUE!
Del Rio	591	Fragment	PA					591		#VALUE!
Del Rio	591	Fiber	PPO					591		#VALUE!
Uvalde	591	Fragment	EPX				591			591
Uvalde	591	Fragment	PPO				591			591
Uvalde	591	Fragment	EPX				591			591
Uvalde	591	Fragment	PVC				591			591
Del Rio	590	fiber	PPS					590		#VALUE!
Del Rio	590	Fiber	PLT					590		#VALUE!
Del Rio	590	Fragment	PC					590		#VALUE!
Uvalde	590	Fiber	DLTDP				590			590
Uvalde	590	Fiber	DLTDP				590			590
Uvalde	590	Fragment	PPS				590			590
Uvalde	590	Fragment	PC				590			590
Uvalde	590	Fragment	EVA				590			590
Uvalde	590	Fragment	FEP				590			590
Uvalde	590	Fragment	PI				590			590
Uvalde	590	Fiber	BR3				590			590
Del Rio	589	Drop	Si					589		#VALUE!
Del Rio	589	Fiber	BR3					589		#VALUE!
Del Rio	589	Fiber	PP					589		#VALUE!
Uvalde	589	Fiber	PEG				589			589
Uvalde	589	Fiber	SB				589			589
Uvalde	589	Fragment	BR3				589			589
Uvalde	589	Fragment	PC				589			589
Uvalde	589	Fragment	PS				589			589
Del Rio	588	Fragment	PC					588		#VALUE!
Del Rio	588	Fiber	PET					588		#VALUE!
Del Rio	588	Fragment	PA					588		#VALUE!
Uvalde	588	Fiber	PC				588			588
Uvalde	588	Fragment	EPX				588			588
Uvalde	588	Fragment	PA				588			588
Del Rio	587	Fragment	PEG					587		#VALUE!
Del Rio	587	Fragment	EPX					587		#VALUE!
Del Rio	587	Fiber	BR3					587		#VALUE!
Uvalde	587	Fragment	PA				587			587
Uvalde	587	Fragment	PMP				587			587
Uvalde	587	Fragment	IIR				587			587
Del Rio	586	Fiber	PB1					586		#VALUE!
Del Rio	586	Fiber	RUBB					586		#VALUE!
Uvalde	586	Fiber	LDPE				586			586
Uvalde	586	Fragment	PA				586			586
Uvalde	586	Fragment	PSO				586			586
Del Rio	585	fiber	EPX					585		#VALUE!
Del Rio	585	Fiber	PVDF					585		#VALUE!
Uvalde	585	Fragment	PP				585			585
Uvalde	585	Fragment	PA				585			585
Del Rio	584	Fiber	PI					584		#VALUE!
Uvalde	584	Fiber	PEG				584			584
Uvalde	584	Fiber	PVC				584			584
Del Rio	583	Fiber	PPS					583		#VALUE!
Uvalde	583	Fragment	PVDF				583			583
Uvalde	583	Fiber	PA				583			583
Del Rio	582	Can't See	PLT					582		#VALUE!
Del Rio	582	Fragment	STR					582		#VALUE!
Del Rio	582	Fragment	LS770					582		#VALUE!
Del Rio	582	Fiber	PC					582		#VALUE!
Uvalde	582	Fiber	PPS				582			582
Uvalde	582	Fragment	PHSI				582			582
Uvalde	582	Fragment	PP				582			582
Del Rio	581	fragment	PAM					581		#VALUE!
Uvalde	581	Fiber	BR3				581			581
Uvalde	581	Fragment	PIP				581			581
Uvalde	581	Fragment	EPX				581			581
Uvalde	581	Fragment	PAR				581			581
Uvalde	581	Fragment	PETG				581			581
Uvalde	581	Fragment	PI				581			581
Uvalde	581	Fiber	NYL				581			581
Del Rio	580	Fiber	RUBB					580		#VALUE!
Del Rio	580	Fragment	HRB					580		#VALUE!
Del Rio	580	Fragment	NYL					580		#VALUE!
Del Rio	580	Fiber	PCL					580		#VALUE!
Uvalde	580	Fiber	EPX				580			580
Uvalde	580	Fiber	PDI				580			580
Uvalde	580	Fragment	PEPQ				580			580
Uvalde	580	Fragment	PET				580			580
Del Rio	579	Fiber	PET					579		#VALUE!
Del Rio	579	Fiber	PA					579		#VALUE!
Uvalde	579	Unknown	PPP				579			579
Uvalde	579	Fiber	LS770				579			579
Uvalde	579	Fiber	PVC				579			579
Del Rio	578	Fiber	ACR					578		#VALUE!
Uvalde	578	Fiber	PTFE2				578			578
Uvalde	578	Fiber	PI				578			578
Uvalde	578	Fragment	RUBB				578			578
Del Rio	577	Fiber	BMC					577		#VALUE!
Uvalde	577	Fiber	RUBB				577			577
Uvalde	577	Fiber	PA				577			577
Uvalde	577	Fragment	PBT				577			577
Del Rio	576	Fiber	PEG					576		#VALUE!
Uvalde	576	Fiber	PS				576			576
Uvalde	576	Fiber	PPS				576			576
Del Rio	575	fiber	PS					575		#VALUE!
Del Rio	575	Fragment	PUR					575		#VALUE!
Uvalde	575	Fiber	PEG				575			575
Uvalde	575	Fiber	PS				575			575
Uvalde	574	Film	PES				574			574
Uvalde	573	Fragment	PA				573			573
Del Rio	572	Fiber	EPX					572		#VALUE!
Uvalde	572	Fiber	Si				572			572
Uvalde	571	Film	PP				571			571
Del Rio	570	Fiber	HDPE					570		#VALUE!
Del Rio	570	Fiber	PS					570		#VALUE!
Uvalde	570	Fiber	PI				570			570
Uvalde	570	Fiber	PEEK				570			570
Del Rio	569	fiber	PI					569		#VALUE!
Del Rio	569	Fiber	PEEK					569		#VALUE!
Del Rio	569	Fiber	BR3					569		#VALUE!
Uvalde	566	Fiber	PES				566			566
Uvalde	564	Fiber	LS770				564			564
	169311					169311	100827	68484

## Sheet: Charts by MP Type
count	Sample	number	Type	Score	Maximum Hits	Type	Abbreviation	Library	Comment		Microplastic Type	Count												Microplastic Type	Count
1	UV042821HA34	3	Fiber	564	ATR-Polymer2	Sanol LS770	LS770	Polymer Additive	Acrylic Adhesive Transmission(Microscope)		ACR	1											1	PC	75
2	UV042821HA46	2	Fiber	566	IRs Polymer2	Polyethersulfone	PES	PES	Poly(alpha-Methylstyrene) DuraSamplIR-II	α-Methylstyrene (AMS) is an organic compound with the formula C6H5C(CH3)=CH2. It is a colorless oil.[4]	AMS	1											2	EPX	23
3	DR042821HA32	3	fiber	569	IRs Polymer2	Polyimide	PI	PI2 (PI)	Aramid Fiber DuraSamplIR-II	Aramid fibers, short for aromatic polyamide, are a class of heat-resistant and strong synthetic fibers. They are used in aerospace and military applications, for ballistic-rated body armor fabric and ballistic composites, in marine cordage, marine hull reinforcement, as an asbestos substitute,[1] and in various lightweight consumer items ranging from phone cases to tennis rackets.	ARA	1											3	PA	16
4	DR041120HG02	6	Fiber	569	T-Polymer2	Polyetheretherketone	PEEK	PEEK	Butyl Methacrylate/Isobutyl Methacrylate Copolymer(50:50) DuraSamplIR-II		BMC	1											4	BR3	14
5	DR041120HT03	11	Fiber	569	T-Polymer2	Polybutadiene	BR3	High-trans Polybutadiene	High-trans Butadiene Rubber(High-trans Polubutadiene) DuraSamplIR-II		BR3	14											5	PPS	13
6	DR041120HJ28	1	Fiber	570	T-Polymer2	Polyethylene	HDPE	T_HDPE	High-trans Butadiene Rubber(High-trans Polybutadiene) Transmission(Microscope)	Synthetic Rubber Polybutadiene [butadiene rubber, BR]	DLTDP	4											6	PI	11
7	DR041120HR01	3	Fiber	570	T-Polymer2	Polystyrene	PS	PS	1,2-Polybutadiene Transmission(Microscope)		EPX	23											7	PEG	10
8	UV042821HA22	13	Fiber	570	ATR-Polymer2	Polyimide	PI	D_PI3	Polybutadiene High-transFilm		EVA	1											8	PVC	7
9	UV042821HA48	9	Fiber	570	ATR-Polymer2	Polyetheretherketone	PEEK	D_PEEK	High-trans Butadiene Rubber(High-trans Polybutadiene) Transmission(Microscope)		FEP	2											9	PLT	6
10	UV042821HA11	1	Film	571	IRs Polymer2	Polypropylene	PP	PP	Polybutadiene High-transFilm		HDPE	2											10	PS	6
11	DR041120HJ28	3	Fiber	572	IRs Polymer2	Epoxy	EPX	Epoxy	1,2-Polybutadiene Transmission(Microscope)		HLAS	2											11	RUBB	6	187	0.672662
12	UV042821HA34	7	Fiber	572	T-Polymer2	Silicon	Si	Silicon Grease	1,2-Polybutadiene Transmission(Microscope)		HRB	4											12	DLTDP	4
13	UV042821HA04	5	Fragment	573	ATR-Polymer2	Irganox 1010	PA	Phenolic Antioxidant	1,2-Polybutadiene Transmission(Microscope)		IIR	1											13	HRB	4
14	UV042821HA52	16	Film	574	IRs Polymer2	Polyethersulfone	PES	PES	1,2-Polybutadiene DuraSamplIR-II Synthetic Rubber		LDPE	3											14	LS770	4
15	DR042821HA32	1	fiber	575	IRs Polymer2	Polystyrene	PS	PS	High-cis Butadiene Rubber(High-cis Polybutadiene) DuraSamplIR-II		LS770	4											15	NYL	4
16	DR041120HE02	10	Fragment	575	IRs Polymer2	Polyurethane	PUR	URETHAN	High-trans Butadiene Rubber(High-trans Polubutadiene) DuraSamplIR-II		MEL	1											16	PET	4
17	UV042821HA05	4	Fiber	575	ATR-Polymer2	Polyethylene glycol	PEG	D_Polyethyleneglycol	1,2-Polybutadiene DuraSamplIR-II		NYL	4											17	PP	4
18	UV042821HA05	16	Fiber	575	IRs Polymer2	Polystyrene	PS	PS	1,2-Polybutadiene Transmission(Microscope)		PA	16											18	Si	4	215	0.773381
19	DR041120HE02	6	Fiber	576	ATR-Polymer2	Polyethylene glycol	PEG	D_Polyethyleneglycol	DLTDPANTIOXIDANT (CONTAINING SULFUR)DILAURYL THIODIPROPIONATEC30H58O4SCAS NO. 123-28-4ATR/diamond ATRcorrected		PAC	3											19	LDPE	3
20	UV042821HA11	4	Fiber	576	IRs Polymer2	Polystyrene	PS	PS	DLTDPANTIOXIDANT (CONTAINING SULFUR)DILAURYL THIODIPROPIONATEC30H58O4SCAS NO. 123-28-4ATR/diamond ATRcorrected		PAM	1											20	PAC	3
21	UV042821HA31	8	Fiber	576	T-Polymer2	Polyphenylene	PPS	PPS	DLTDPANTIOXIDANT (CONTAINING SULFUR)DILAURYL THIODIPROPIONATEC30H58O4SCAS NO. 123-28-4ATR/diamond ATRcorrected		PAP	1											21	PEEK	3
22	DR041120HE02	11	Fiber	577	ATR-Polymer2	Butyl Methacrylate	BMC	D_ButylMethacrylate_IsobutylMethacrylate	DLTDPANTIOXIDANT (CONTAINING SULFUR)DILAURYL THIODIPROPIONATEC30H58O4SCAS NO. 123-28-4ATR/diamond ATRcorrected		PAR	2											22	PEI	3
23	UV042821HA05	5	Fiber	577	IRs Polymer2	Butyl Rubber	RUBB	BUTYL_RB	Epoxy resin (liquid)ATR/diamond ATRcorrected		PB1	1											23	PEPQ	3
24	UV042821HA34	15	Fiber	577	IRs Polymer2	Irganox 1330	PA	Phenolic Antioxidant	Epoxy Resin(Electronic Parts-3) Transmission(Microscope)		PBT	2											24	PES	3		0.305085
25	UV042821HA48	15	Fragment	577	T-Polymer2	Polybutylene Terephthalate	PBT	PBT	Epoxy Adhesives Transmission(Microscope)		PC	75											25	PVDF	3
26	DR041120HR01	17	Fiber	578	T-Polymer2	Acrylic	ACR	Acrylic Adhesive	Epoxy Adhesives Transmission(Microscope)		PCL	1											26	FEP	2
27	UV042821HA04	3	Fiber	578	ATR-Polymer2	Poly(Tetrafluoroethylene)	PTFE2	D_PTFE2	Epoxy Resin Transmission(Microscope)		PDI	1											27	HDPE	2
28	UV042821HA31	1	Fiber	578	ATR-Polymer2	Polyimide	PI	D_PI2	Epoxy Adhesives DuraSamplIR-II		PEEK	3											28	HLAS	2
29	UV042821HA31	10	Fragment	578	T-Polymer2	Polyisoprene Rubber	RUBB	IR-trans	Epoxy Resin(Electronic Parts-2) Transmission(Microscope)		PEG	10											29	PAR	2
30	DR041120HM01	2	Fiber	579	T-Polymer2	Polyester	PET	Polyester	Epoxy Adhesives Transmission(Microscope)		PEI	3											30	PBT	2
31	DR041120HT03	12	Fiber	579	IRs Polymer2	Irganox 1010	PA	Phenolic Antioxidant	Epoxy Resin Transmission(Microscope)		PEPQ	3											31	PMP	2
32	UV042821HA05	2	Unknown	579	T-Polymer2	Polyphenylene	PPP	PPS	Epoxy Adhesives Transmission(Microscope)		PES	3											32	PPO	2
33	UV042821HA05	14	Fiber	579	ATR-Polymer2	Sanol LS770	LS770	Polymer Additive	Epoxy Resin(Electronic Parts-3) Transmission(Microscope)		PET	4											33	PSO	2
34	UV042821HA12	1	Fiber	579	T-Polymer2	Polyvinylchloride	PVC	T_PVC with PhenoricSulfonicEster	Epoxy Resin(Electronic Parts-3) Transmission(Microscope)		PETG	1											34	ACR	1
35	DR041120HG06	1	Fiber	580	ATR-Polymer2	Polyisoprene Rubber	RUBB	D_IR-cis	Epoxy Adhesives Transmission(Microscope)		PHSI	1											35	AMS	1
36	DR041120HG06	12	Fragment	580	T-Polymer2	Phenoxy	HRB	Herbicide	Epoxy Resin Transmission(Microscope)		PI	11											36	ARA	1
37	DR041120HJ03	3	Fragment	580	IRs Polymer2	Nylon	NYL	Nylon	Epoxy Resin Transmission(Microscope)		PIB	1											37	BMC	1
38	DR041120HT03	8	Fiber	580	ATR-Polymer2	Polycaprolac tone	PCL	D_Polycaprolactone	Epoxy Resin Transmission(Microscope)		PIP	1											38	EVA	1
39	UV042821HA05	6	Fiber	580	T-Polymer2	Epoxy	EPX	Epoxy	Epoxy Resin(Electronic Parts-1) Transmission(Microscope)		PLT	6											39	IIR	1
40	UV042821HA05	7	Fiber	580	T-Polymer2	Polydiallyl Isophthalate	PDI	T_Polydiallyl_Isophthalate	Epoxy Resin(Electronic Parts-1) DuraSamplIR-II		PMP	2											40	MEL	1
41	UV042821HA46	4	Fragment	580	IRs Polymer2	P-EPQANTIOXIDANT PHOSPHONITE	PEPQ	P-EPQ	Epoxy Resin DuraSamplIR-II		POM	1											41	PAM	1
42	UV042821HA46	16	Fragment	580	ATR-Polymer2	Polyester	PET	D_Polyester2	Epoxy Resin DuraSamplIR-II		PP	4											42	PAP	1
43	DR042821HA32	2	fragment	581	ATR-Polymer2	Polyalpha Methylstyrene	PAM	D_Poly_alpha_Methylstyrene	Epoxy Resin(Electronic Parts-1) DuraSamplIR-II		PPO	2											43	PB1	1
44	UV042821HA04	21	Fiber	581	ATR-Polymer2	Polybutadiene	BR3	D_1_2_Polybutadiene Synthetic Rubber	Epoxy Resin Transmission(Microscope)		PPP	1											44	PCL	1
45	UV042821HA11	6	Fragment	581	IRs Polymer2	Polyisoprene	PIP	PIP	Epoxy Resin DuraSamplIR-II		PPS	13											45	PDI	1
46	UV042821HA12	3	Fragment	581	T-Polymer2	Epoxy	EPX	Epoxy	Ethylene/Vinyl Acetate(EVA) Copolymer(Vinyl Acetate content 40%) Transmission(Microscope)		PS	6											46	PETG	1
47	UV042821HA12	6	Fragment	581	T-Polymer2	Polyarylate	PAR	PAR	FEP,Tetrafluoroethylene HexafluoropropyleneATR/diamond ATRcorrected		PSO	2											47	PHSI	1
48	UV042821HA34	13	Fragment	581	IRs Polymer2	Polyethylene Glycol	PETG	PETG	Tetrafluoroethylene-Hexafluoropropylene(FEP) Transmission(Microscope)		PTFE2	1											48	PIB	1
49	UV042821HA46	7	Fragment	581	ATR-Polymer2	Polyimide	PI	D_PI4	High Density Polyethylene(HDPE) Transmission(Microscope)		PUR	1											49	PIP	1
50	UV042821HA52	15	Fiber	581	ATR-Polymer2	Nylon	NYL	Nylon	High Density Polyethylene(HDPE) Transmission(Microscope)		PVC	7											50	POM	1
51	DR041120HG06	8	Can't See	582	ATR-Polymer2	Polyamide	PLT	D_Polyamide6 wool & Silk I call in Plant	Chimassorb 944LDHINDERED AMINE LIGHT STABILIZER (POLYMERIC)CAS NO. 71878-19-8ATR/diamond ATRcorrected	Chimassorb® 944 is a high molecular weight hindered amine light stabilizer (HALS). It shows excellent compatibility, good resistance to extraction and low volatility.	PVDC	1											51	PPP	1
52	DR041120HG06	14	Fragment	582	T-Polymer2	Styrene	STR	Styrene-Ethylene-Butylene	Polymer Additive(Chimassorb 944LD) DuraSamplIR-II		PVDF	3											52	PTFE2	1
53	DR041120HJ03	4	Fragment	582	IRs Polymer2	Sanol LS770	LS770	SanolLS770	Phenoxy Resin Transmission(Microscope)		RUBB	6											53	PUR	1
54	DR041120HJ28	2	Fiber	582	T-Polymer2	Polycarbonate	PC	PC	Phenoxy Resin Transmission(Microscope)	Phenoxy herbicides (or "phenoxies") are two families of chemicals that have been developed as commercially important herbicides, widely used in agriculture. They share the part structure of phenoxyacetic acid	SB	1											54	PVDC	1
55	UV042821HA05	15	Fiber	582	ATR-Polymer2	Polyphenylene sulfide	PPS	D_PPS	Phenoxy Resin Transmission(Microscope)	Phenoxy herbicides (or "phenoxies") are two families of chemicals that have been developed as commercially important herbicides, widely used in agriculture. They share the part structure of phenoxyacetic acid	SBS	1											55	SB	1
56	UV042821HA05	21	Fragment	582	IRs Polymer2	Phenylsilicone	PHSI	PHSI	Phenoxy Resin Transmission(Microscope)	Phenoxy herbicides (or "phenoxies") are two families of chemicals that have been developed as commercially important herbicides, widely used in agriculture. They share the part structure of phenoxyacetic acid	Si	4											56	SBS	1
57	UV042821HA31	5	Fragment	582	IRs Polymer2	Polypropylene	PP	PP	IIR(Isobutylene-Isoprene Rubber) DuraSamplIR-II		SMA	1											57	SMA	1
58	DR041120HR01	16	Fiber	583	ATR-Polymer2	Polyphenlene Sulfide	PPS	D_PPS2	Low Density PolyethyleneFilm		STR	1											58	STR	1
59	UV042821HA12	14	Fragment	583	T-Polymer2	Polyvinylindene Flouride	PVDF	PVDF	Low Density PolyethyleneFilm		WOIL	1											59	WOIL	1
60	UV042821HA31	6	Fiber	583	ATR-Polymer2	Irganox 1010	PA	Phenolic Antioxidant	Low Density PolyethyleneFilm			278													278
61	DR041120HG06	4	Fiber	584	ATR-Polymer2	Polyimide	PI	D_PI3	Polymer Additive(Sanol LS770) DuraSamplIR-II	LS 770 is recommended to be used in polypropylene, impact modified PP(TPO),EPDM, polystyrene ,impact polystyrene ABS,SAN,ASA and polyurethanes and is also effective in polyamides and polyacetals. LS 770 is a low molecular weight hindered amine light stabilizer that provides excellent light stability for thick sections and films in the recommended substrates.
62	UV042821HA04	16	Fiber	584	ATR-Polymer2	Polyethylene glycol	PEG	D_Polyethyleneglycol	Polymer Additive(Sanol LS770) DuraSamplIR-II	LS 770 is recommended to be used in polypropylene, impact modified PP(TPO),EPDM, polystyrene ,impact polystyrene ABS,SAN,ASA and polyurethanes and is also effective in polyamides and polyacetals. LS 770 is a low molecular weight hindered amine light stabilizer that provides excellent light stability for thick sections and films in the recommended substrates.
63	UV042821HA46	1	Fiber	584	IRs Polymer2	Polyvinylchloride	PVC	PVDC	Sanol LS770HINDERED AMINE LIGHT STABILIZERBIS(2,2,6,6-TETRAMETHYL-4-PIPERIDYL)SEBACATEC28H52N2O4CAS NO. 52829-07-9ATR/diamond ATRcorrected
64	DR042821HA32	4	fiber	585	T-Polymer2	Epoxy	EPX	Epoxy	Polymer Additive(Sanol LS770) DuraSamplIR-II
65	DR041120HG06	11	Fiber	585	ATR-Polymer2	Polyvinylindene Flouride	PVDF	D_PVDF	Melamin FormATR/diamond ATRcorrected	Melamine /ˈmɛləmiːn/ ⓘ is an organic compound with the formula C3H6N6. This white solid is a trimer of cyanamide, with a 1,3,5-triazine skeleton. Like cyanamide, it contains 66% nitrogen by mass, and its derivatives have fire-retardant properties due to its release of nitrogen gas when burned or charred.
66	UV042821HA46	3	Fragment	585	ATR-Polymer2	polypropylene	PP	D_PP_Chlorinated	Nylon 6 ATR/diamond ATRcorrected
67	UV042821HA48	3	Fragment	585	IRs Polymer2	Irganox MD1024	PA	Phenolic Antioxidant	Nylon 6/12(Polyhexamethylene dodecanediamide) DuraSamplIR-II	Duplicte # 7
68	DR041120HG02	4	Fiber	586	ATR-Polymer2	Poly (1-Butene)	PB1	D_Poly_1_Butene	Nylon MXD6Film
69	DR041120HG06	3	Fiber	586	IRs Polymer2	Butyl Rubber	RUBB	BUTYL_RB	Nylon 11 [-NH(CH2)10CO-]nFilm
70	UV042821HA05	8	Fiber	586	IRs Polymer2	Low	LDPE	LLDPE1	Polymer Additive(Irganox 1010) DuraSamplIR-II	Irganox® 1010 is a sterically hindered phenolic antioxidant designed to protects organic substrates such as plastics, synthetic fibers, elastomers against thermo-oxidative degradation.
71	UV042821HA11	2	Fragment	586	ATR-Polymer2	Irganox 1076	PA	Phenolic Antioxidant	Irganox 1330 ANTIOXIDANT (Penol)C54H78O31,3,5-TRIMETHYL-2,4,6-TRIS(3,5-DI-tert-BUTYL-4-HYDROXYBENZYL)BENZENECAS NO. 1709-70-2ATR/diamond ATRcorrected	Irganox® 1330 is a hindered phenolic antioxidant designed for processing and long-term thermal stabilization. It is a highly effective stabilizer for organic substrates such as polymers, synthetic fibers and elastomers.
72	UV042821HA34	11	Fragment	586	ATR-Polymer2	Polysulfone	PSO	D_Polysulfone	Irganox1010ANTIOXIDANT(Phenol)C73H108O12CAS NO. 6683-19-8ATR/diamond ATRcorrected	Irganox® 1010 is a sterically hindered phenolic antioxidant designed to protects organic substrates such as plastics, synthetic fibers, elastomers against thermo-oxidative degradation.
73	DR041120HJ03	7	Fragment	587	T-Polymer2	Polyethylene	PEG	PEG	Polymer Additive(Irganox 1010) DuraSamplIR-II	a sterically hindered phenolic antioxidant – is a highly effective,non discoloring stabilizer for organic substrates such as plastics, synthetic fibers, elastomers, adhesives, waxes, oils and fats.
74	DR041120HM01	9	Fragment	587	T-Polymer2	Epoxy	EPX	Epoxy	Irganox MD1024 HINDERED PHENOLIC ANTIOXIDANT-METAL DEACTIVATOR1,2-BIS(3,5-DI-tert-BUTYL-4-HYDROXYHYDROCINNAMOYL)HYDRAZINE; HINDERED PHENOLC34H52O4N2CAS NO. 32687-78-8ATR/diamond ATRcorrected
75	DR041120HR01	1	Fiber	587	T-Polymer2	Polybutadiene	BR3	T_1_2_Polybutadiene	Polymer Additive(Irganox 1076) DuraSamplIR-II	a sterically hindered phenolic antioxidant, is a highly efficient, non-discoloring stabilizer for organic substrates such as plastics, synthetic fibers, elastomers, adhesives, waxes, oils and fats.
76	UV042821HA05	18	Fragment	587	ATR-Polymer2	Irganox MD1024	PA	Phenolic Antioxidant	Polymer Additive(Irganox MD1024) DuraSamplIR-II	is a metal deactivator and primary, sterically hindered phenolic antioxidant for telecommunication wire and cable applications.
77	UV042821HA31	3	Fragment	587	ATR-Polymer2	Polymethylpentene	PMP	D_Poly_4_Methyl_1_Pentene	Polymer Additive(Irganox 1330) Transmission(Microscope)
78	UV042821HA34	10	Fragment	587	ATR-Polymer2	IIR	IIR	D_IIR Rubber	Polymer Additive(Irganox 1330) DuraSamplIR-II
79	DR041120HG06	16	Fragment	588	ATR-Polymer2	Polycarbonate	PC	D_PC2	Polymer Additive(Irganox MD1024) DuraSamplIR-II
80	DR041120HM01	10	Fiber	588	ATR-Polymer2	Polyester	PET	D_Polyester4	Polymer Additive(Irganox 1330) Transmission(Microscope)
81	DR041120HT03	3	Fragment	588	T-Polymer2	Irganox 1330	PA	Phenolic Antioxidant	Irganox MD1024 HINDERED PHENOLIC ANTIOXIDANT-METAL DEACTIVATOR1,2-BIS(3,5-DI-tert-BUTYL-4-HYDROXYHYDROCINNAMOYL)HYDRAZINE; HINDERED PHENOLC34H52O4N2CAS NO. 32687-78-8ATR/diamond ATRcorrected
82	UV042821HA05	11	Fiber	588	ATR-Polymer2	Polycarbonate	PC	D_PC-PBT	Polymer Additive(Irganox 1330) DuraSamplIR-II
83	UV042821HA05	24	Fragment	588	ATR-Polymer2	Epoxy	EPX	Epoxy	Polymer Additive(Irganox 1330) DuraSamplIR-II
84	UV042821HA31	14	Fragment	588	ATR-Polymer2	Irganox 1330	PA	Phenolic Antioxidant	Polymer Additive(Irganox MD1024) Transmission(Microscope)
85	DR041120HG02	3	Drop	589	T-Polymer2	Silicon	Si	Silicon Grease	Polymer Additive(Irganox 1076) Transmission(Microscope)
86	DR041120HJ03	1	Fiber	589	IRs Polymer2	Polybutadiene	BR3	BR3	Polyacetylene Transmission(Microscope)
87	DR041120HR01	19	Fiber	589	T-Polymer2	Polypropylene	PP	PP	Polyacetylene Transmission(Microscope)
88	UV042821HA22	6	Fiber	589	ATR-Polymer2	Polyethylene Oxide	PEG	D_PolyethyleneOxide	Polyacetylene Transmission(Microscope)
89	UV042821HA22	12	Fiber	589	ATR-Polymer2	Styrene Butadiene	SB	D_SB	Poly(alpha-Methylstyrene) DuraSamplIR-II
90	UV042821HA22	14	Fragment	589	ATR-Polymer2	Butadiene	BR3	High-trans Polybutadiene	Paper Transmission(Microscope)
91	UV042821HA52	7	Fragment	589	T-Polymer2	Polycarbonate	PC	PC	Polyarylate(PAR) Transmission(Microscope)
92	UV042821HA52	9	Fragment	589	IRs Polymer2	Polystyrene	PS	PS	Polyarylate(PAR) Transmission(Microscope)
93	DR042821HA32	15	fiber	590	IRs Polymer2	Polyphenylene Sulfide	PPS	PPS	Poly(1-Butene), Isotactic DuraSamplIR-II	Isotactic poly (1-butene) (PB-1) is a thermoplastic polyolefin with outstanding mechanical properties, like high creep resistance, low stiffness, good impact behavior, and excellent elastic recovery.
94	DR041120HG02	5	Fiber	590	IRs Polymer2	Ramie	PLT	RAMIE Plant Fiber Organic	Polybutylene Terephthalate(PBT) Transmission(Microscope)
95	DR041120HG06	6	Fragment	590	T-Polymer2	Polycarbonate	PC	PC	PolybuteneATR/diamond ATRcorrected
96	UV042821HA05	3	Fiber	590	IRs Polymer2	DLTDPANTIOXIDANT	DLTDP	DLTDP	Polycarbonate(PC) Transmission(Microscope)
97	UV042821HA05	17	Fiber	590	IRs Polymer2	DLTDPANTIOXIDANT	DLTDP	DLTDP	Polycarbonate(PC) DuraSamplIR-II
98	UV042821HA11	7	Fragment	590	IRs Polymer2	Polyphenylene Sulfide	PPS	PPS	Polycarbonate/Polybutylene Terephthalate(PC/PBT) DuraSamplIR-II
99	UV042821HA31	15	Fragment	590	IRs Polymer2	Polycarbonate	PC	PC	Polycarbonate(PC) Transmission(Microscope)
100	UV042821HA34	14	Fragment	590	T-Polymer2	Ethylene Vinyl Acetate	EVA	T_EVA-6	Polycarbonate(PC) Transmission(Microscope)
101	UV042821HA52	2	Fragment	590	IRs Polymer2	Tetrafluoroethylene	FEP	FEP	Polycarbonate/CD-ROMATR/diamond ATRcorrected
102	UV042821HA52	5	Fragment	590	IRs Polymer2	Polyimide	PI	PI1	Polycarbonate(PC) Transmission(Microscope)
103	UV042821HA52	11	Fiber	590	T-Polymer2	Polybutadiene	BR3	High-trans Polybutadiene	Polycarbonate(PC) Transmission(Microscope)
104	DR041120HJ03	2	Fiber	591	ATR-Polymer2	Styrene Maleic Anhydride	SMA	D_Styrene_Maleic_Anhydride	Polycarbonate(PC) Transmission(Microscope)
105	DR041120HJ03	5	Fragment	591	IRs Polymer2	Polyetherimide	PEI	PEI	Polycarbonate(PC) DuraSamplIR-II
106	DR041120HJ28	4	Fiber	591	IRs Polymer2	Tetrakis(2,4-di-tert-butylphenyl) (1,1-biphenyl)-4,4'-diylbisphosphonite	PEPQ	P-EPQ	Polycarbonate/Polybutylene Terephthalate(PC/PBT) DuraSamplIR-II
107	DR041120HM01	4	Fragment	591	ATR-Polymer2	Irganox MD 1024	PA	Phenolic Antioxidant	Polycarbonate(PC) DuraSamplIR-II
108	DR041120HR01	6	Fiber	591	ATR-Polymer2	Polyethylene Oxide	PPO	D_PolyethyleneOxide	Polycarbonate(PC) DuraSamplIR-II
109	UV042821HA34	9	Fragment	591	T-Polymer2	Epoxy	EPX	Epoxy	Polycarbonate(PC) DuraSamplIR-II
110	UV042821HA46	5	Fragment	591	ATR-Polymer2	Polyphenylene Oxide	PPO	D_PPO-PA	Polycarbonate(PC) Transmission(Microscope)
111	UV042821HA46	17	Fragment	591	T-Polymer2	Epoxy	EPX	Epoxy	Polycarbonate/Polybutylene Terephthalate(PC/PBT) DuraSamplIR-II
112	UV042821HA48	5	Fragment	591	ATR-Polymer2	Polyvinylchloride	PVC	D_PVC_Carboxylated	Polycarbonate(PC) Transmission(Microscope)
113	DR041120HE02	12	Fragment	592	IRs Polymer2	Polyetherimide	PEI	PEI	Polycarbonate(PC) DuraSamplIR-II
114	DR041120HG06	19	Fragment	592	T-Polymer2	Polycarbonate	PC	PC	Polycarbonate(PC) DuraSamplIR-II
115	UV042821HA05	12	Fiber	592	T-Polymer2	Polyimide	PI	PI	Polycarbonate(PC) Transmission(Microscope)
116	UV042821HA12	4	Fragment	592	ATR-Polymer2	Polyvinylindene Flouride	PVDF	D_PVDF	Polycarbonate(PC) Transmission(Microscope)
117	UV042821HA12	11	Fragment	592	ATR-Polymer2	Polyimide	PI	D_PI1	Polycarbonate(PC) DuraSamplIR-II
118	UV042821HA34	8	Fiber	592	IRs Polymer2	POLYETHYLENE	PEG	PETG-20	Polycarbonate(PC) DuraSamplIR-II
119	DR042821HA32	8	fiber	593	ATR-Polymer2	Polyimide	PI	D_PI1	Polycarbonate/CD-ROMATR/diamond ATRcorrected
120	DR041120HR01	18	Fiber	593	IRs Polymer2	Polybutadiene	BR3	BR3	Polycarbonate(PC) Transmission(Microscope)
121	UV042821HA04	1	Fragment	593	T-Polymer2	Epoxy	EPX	Epoxy	Polycarbonate(PC) Transmission(Microscope)
122	UV042821HA46	14	Fragment	593	ATR-Polymer2	Aramid	ARA	D_Aramid	Polycarbonate(PC) Transmission(Microscope)
123	UV042821HA48	8	Fragment	593	T-Polymer2	Polycarbonate	PC	PC	Polycarbonate(PC) DuraSamplIR-II
124	UV042821HA52	13	Fragment	593	IRs Polymer2	DLTDPANTIOXIDANT	DLTDP	DLTDP	Polycarbonate(PC) Transmission(Microscope)
125	DR041120HM01	7	Fiber	594	T-Polymer2	Polybutadiene	BR3	T_1_2_Polybutadiene	Polycarbonate(PC) Transmission(Microscope)
126	UV042821HA52	8	Fragment	594	T-Polymer2	Polycarbonate	PC	T_PC2	Polycarbonate(PC) DuraSamplIR-II
127	UV042821HA52	18	Fragment	594	T-Polymer2	Epoxy	EPX	Epoxy	Polycarbonate(PC) Transmission(Microscope)
128	DR041120HM01	5	Fragment	595	IRs Polymer2	Chimassorb 944LD	HLAS	Chimassorb 944LD	Polycarbonate(PC) Transmission(Microscope)
129	DR041120HT03	5	Fragment	595	ATR-Polymer2	Polyvinylchloried	PVC	D_PVC with TerephthalicEster	Polycarbonate(PC) DuraSamplIR-II
130	DR041120HT03	13	Fragment	595	IRs Polymer2	PVDC	PVDC	PVDC	Polycarbonate(PC) Transmission(Microscope)
131	UV042821HA12	8	Fragment	595	T-Polymer2	Irganox 1330	PA	Phenolic Antioxidant	Polycarbonate(PC) Transmission(Microscope)
132	UV042821HA31	11	Fragment	595	IRs Polymer2	Irganox MD1024	PA	Phenolic Antioxidant	Polycarbonate(PC) Transmission(Microscope)
133	UV042821HA46	12	Fragment	595	T-Polymer2	Epoxy	EPX	Epoxy	Polycarbonate(PC) Transmission(Microscope)
134	UV042821HA48	1	Fragment	595	T-Polymer2	Epoxy	EPX	Epoxy	Polycarbonate(PC) Transmission(Microscope)
135	DR041120HE02	2	Fragment	596	IRs Polymer2	POLYETHYLENE	PEG	PETG-20	Polycarbonate(PC) DuraSamplIR-II
136	DR041120HG06	10	Fiber	596	ATR-Polymer2	Polyethersulfone	PES	D_PES	Polycarbonate(PC) Transmission(Microscope)
137	UV042821HA05	23	Can't see	596	ATR-Polymer2	D_Poly_alpha_Methylstyrene	AMS	D_Poly_alpha_Methylstyrene	Polycarbonate(PC) Transmission(Microscope)
138	UV042821HA52	6	Fragment	596	ATR-Polymer2	Polymethylpentene	PMP	D_Poly_4_Methyl_1_Pentene	Polycarbonate(PC) DuraSamplIR-II
139	UV042821HA52	12	Fragment	596	T-Polymer2	Polybutadiene	BR3	T_1_2_Polybutadiene	Polycarbonate(PC) DuraSamplIR-II
140	UV042821HA31	13	Fragment	597	IRs Polymer2	DLTDPANTIOXIDANT	DLTDP	DLTDP	Polycarbonate(PC) DuraSamplIR-II
141	UV042821HA34	4	Fragment	597	ATR-Polymer2	Polyoxymethylene	POM	Polyacetal	Polycarbonate(PC) DuraSamplIR-II
142	DR042821HA32	13	fiber	598	IRs Polymer2	Polybutene ATR	PBT	PB	Polycarbonate(PC) Transmission(Microscope)
143	DR041120HG02	1	Fragment	598	ATR-Polymer2	Polycarbonate	PC	D_PC2	Polycarbonate(PC) DuraSamplIR-II
144	UV042821HA05	13	Fiber	598	ATR-Polymer2	Irganox 1330	PA	Phenolic Antioxidant	Polycarbonate(PC) Transmission(Microscope)
145	UV042821HA12	2	Fragment	598	T-Polymer2	Polyphenylene Sulfide	PPS	PPS	Polycarbonate(PC) Transmission(Microscope)
146	UV042821HA31	17	Fragment	598	T-Polymer2	Polybutadiene	BR3	T_1_2_Polybutadiene	Polycarbonate(PC) Transmission(Microscope)
147	UV042821HA46	11	Fragment	598	ATR-Polymer2	Polybutadiene	BR3	High cis Polybutadiene	Polycarbonate(PC) Transmission(Microscope)
148	DR042821HA32	9	fragment	599	IRs Polymer2	Ramie	PLT	RAMIE Plant Fiber Organic	Polycarbonate/CD-ROMATR/diamond ATRcorrected
149	DR041120HJ28	5	Fiber	599	T-Polymer2	Polyester	PET	Polyester	Polycarbonate(PC) Transmission(Microscope)
150	UV042821HA12	12	Fragment	599	T-Polymer2	Epoxy	EPX	Epoxy	Polycarbonate(PC) Transmission(Microscope)
151	UV042821HA12	17	Fiber	599	IRs Polymer2	Polyphenylene Sulfide	PPS	PPS	Polycarbonate(PC) Transmission(Microscope)
152	UV042821HA22	4	Fragment	599	T-Polymer2	Polyethylene	HDPE	T_HDPE	Polycarbonate/CD-ROMATR/diamond ATRcorrected
153	UV042821HA48	12	Fragment	599	T-Polymer2	Epoxy	EPX	Epoxy	Polycarbonate(PC) Transmission(Microscope)
154	DR041120HG02	7	Fragment	600	IRs Polymer2	POLYETHYLENE	PEG	PETG-20	Polycarbonate(PC) Transmission(Microscope)
155	UV042821HA12	10	Fragment	600	ATR-Polymer2	Sanol LS770	LS770	D_Additive6	Polycarbonate(PC) Transmission(Microscope)
156	UV042821HA12	13	Fragment	600	ATR-Polymer2	Polyethylene glycol	PEG	D_Polyethyleneglycol	Polycarbonate(PC) Transmission(Microscope)
157	UV042821HA31	16	Fragment	600	T-Polymer2	Epoxy	EPX	Epoxy	Polycarbonate(PC) DuraSamplIR-II
158	UV042821HA34	1	Unknown	600	ATR-Polymer2	Irganox 1330	PA	Phenolic Antioxidant	Polycarbonate(PC) DuraSamplIR-II
159	UV042821HA46	9	Fragment	600	IRs Polymer2	Polystyrene	PS	PS1	Polycarbonate(PC) DuraSamplIR-II
160	DR041120HG02	2	Fragment	601	IRs Polymer2	PEEK Film	PEEK	PEEK	Polycarbonate(PC) DuraSamplIR-II
161	DR041120HG06	17	Fragment	601	T-Polymer2	Phenoxy	HRB	Herbicide	Polycarbonate(PC) DuraSamplIR-II
162	UV042821HA31	9	Fragment	601	ATR-Polymer2	Polimide	PI	D_PI2	Polycarbonate(PC) Transmission(Microscope)
163	DR041120HR01	15	Fragment	602	ATR-Polymer2	Cellulose	PLT	D_Cellulose5 Plant	Polycarbonate(PC) DuraSamplIR-II
164	UV042821HA11	8	Fragment	602	T-Polymer2	Epoxy	EPX	Epoxy	Polycarbonate(PC) DuraSamplIR-II
165	UV042821HA31	19	Fragment	602	T-Polymer2	Phenoxy	HRB	Herbicide	Polycarbonate(PC) Transmission(Microscope)
166	UV042821HA46	10	Fragment	602	ATR-Polymer2	Polyimide	PI	D_PI1	Polycarbonate(PC) DuraSamplIR-II
167	DR042821HA32	11	fragment	603	ATR-Polymer2	Polycarbonate	PC	D_PC-PBT	Polycarbonate(PC) Transmission(Microscope)
168	DR041120HG06	15	Fragment	603	ATR-Polymer2	Polycarbonate	PC	D_PC	Polycarbonate(PC) DuraSamplIR-II
169	DR041120HR01	10	Fragment	603	ATR-Polymer2	Polycarbonate	PC	D_PC	Polycarbonate(PC) Transmission(Microscope)
170	UV042821HA22	1	Fragment	603	T-Polymer2	Epoxy	EPX	Epoxy	Polycarbonate(PC) Transmission(Microscope)
171	UV042821HA22	11	Fiber	603	ATR-Polymer2	Polybutadiene	BR3	High trans Polybutadiene	Polycaprolactone DuraSamplIR-II	Polycaprolactone (PCL) is a synthetic, semi-crystalline, biodegradable polyester with a melting point of about 60 °C and a glass transition temperature of about −60 °C
172	UV042821HA48	11	Fragment	603	T-Polymer2	Polyarylate	PAR	PAR	Poly(Diallyl Isophthalate) Transmission(Microscope)
173	UV042821HA46	6	Fragment	604	T-Polymer2	Irganox MD1024	PA	Phenolic Antioxidant	Polyetheretherketone(PEEK) Transmission(Microscope)
174	DR041120HG02	8	Fragment	605	IRs Polymer2	Silicone	Si	SILICO2	Polyetheretherketone(PEEK) DuraSamplIR-II
175	UV042821HA05	20	Fiber	605	ATR-Polymer2	Polyetherimide	PEI	D_PEI	PEEKFilm
176	UV042821HA31	4	Fragment	605	T-Polymer2	Polyphenylene Sulfide	PPS	PPS	Polyethylene Glycol 20000 DuraSamplIR-II
177	UV042821HA48	4	Fragment	605	ATR-Polymer2	Polycarbonate	PC	D_PC	Polyethylene Glycol 20000 DuraSamplIR-II
178	DR041120HE02	3	Fragment	606	ATR-Polymer2	Polybutadiene	BR3	D_1_2_Polybutadiene	Polyethylene Glycol 20000 DuraSamplIR-II
179	UV042821HA04	4	Fragment	606	ATR-Polymer2	Polybutene ATR	PIB	D_Polybutene	Polyethylene Glycol 20000 Transmission(Microscope)
180	UV042821HA22	5	Fiber	606	IRs Polymer2	Polyphenylene Sulfide	PPS	PPS	Poly(Ethylene Oxide) DuraSamplIR-II
181	UV042821HA22	10	Fragment	606	T-Polymer2	Irganox 1076	PA	Phenolic Antioxidant	POLYETHYLENE GLYCOLORIGIN Date: 92/04/09 File: PETG-20.DXINFRARED SPECTROPHOTOMETER FTIR-8000 SERIES
182	UV042821HA31	18	Fragment	606	ATR-Polymer2	D_Polyisoprene_Chlorinated	RUBB	D_Polyisoprene_Chlorinated	POLYETHYLENE GLYCOLORIGIN Date: 92/04/09 File: PETG-20.DXINFRARED SPECTROPHOTOMETER FTIR-8000 SERIES
183	UV042821HA34	12	Fragment	606	ATR-Polymer2	trans-Polyisoprene Rubber	RUBB	D_IR-trans	POLYETHYLENE GLYCOLORIGIN Date: 92/04/09 File: PETG-20.DXINFRARED SPECTROPHOTOMETER FTIR-8000 SERIES
184	UV042821HA46	8	Fragment	606	IRs Polymer2	Polyethylene glycol	PEG	PETG	Polyethylene Glycol 20000 DuraSamplIR-II
185	DR041120HG06	9	Fragment	607	T-Polymer2	Polyacetylene	PAC	Polyacetylene	Polyethylene glycolORIGIN Date: 92/03/27 File: PETG.DXINFRARED SPECTROPHOTOMETER FTIR-8000 SERIES
186	DR041120HM01	6	Fragment	607	ATR-Polymer2	Polysulfone	PSO	D_Polysulfone	PolyetherimideFilm
187	UV042821HA05	1	Fiber	607	ATR-Polymer2	Polyphenylene Sulfide	PPS	D_PPS	Poly etherimideFilm
188	UV042821HA12	7	Fragment	608	ATR-Polymer2	Polyvinylchloride	PVC	D_PVC with PhthalicEster 1	Polyetherimide(PEI) DuraSamplIR-II
189	UV042821HA34	6	Fragment	608	IRs Polymer2	SBS Film	SBS	SBS	P-EPQANTIOXIDANT PHOSPHONITE COMPOUNDC68H92O4P2CAS NO. ATR/diamond ATRcorrected
190	UV042821HA05	9	Fragment	609	IRs Polymer2	Tetrakis(2,4-di-tert-butylphenyl) (1,1-biphenyl)-4,4'-diylbisphosphonite	PEPQ	P-EPQ	P-EPQANTIOXIDANT PHOSPHONITE COMPOUNDC68H92O4P2CAS NO. ATR/diamond ATRcorrected
191	DR041120HG06	21	Fragment	611	T-Polymer2	Polybutadiene	BR3	T_1_2_Polybutadiene	P-EPQANTIOXIDANT PHOSPHONITE COMPOUNDC68H92O4P2CAS NO. ATR/diamond ATRcorrected
192	UV042821HA11	5	Fragment	612	ATR-Polymer2	Epoxy	EPX	Epoxy	Polyethersulfone(PES) DuraSamplIR-II
193	DR042821HA32	14	fragment	613	T-Polymer2	Polycarbonate	PC	PC	PESFilm
194	UV042821HA12	5	Fragment	613	ATR-Polymer2	Chimassorb 944LD	HLAS	Chimassorb 944LD	Polyethersulfone(PES) DuraSamplIR-II
195	UV042821HA34	2	Fragment	613	ATR-Polymer2	Epoxy	EPX	Epoxy	Polyester Film(TOYOBO ESTER FILM & ESPET FILM) Transmission(Microscope)
196	UV042821HA22	2	Fragment	614	ATR-Polymer2	Polycarbonate	PC	D_PC-PBT	Polyester Film(TAIKO-FE) DuraSamplIR-II
197	DR041120HM01	8	Fragment	615	ATR-Polymer2	Polyphenylene Sulfide	PPS	D_PPS2	Polyester Film(TOYOBO ESTER FILM & ESPET FILM) DuraSamplIR-II
198	DR041120HR01	11	Fragment	615	T-Polymer2	Polycarbonate	PC	T_PC2	Polyester Film(TOYOBO ESTER FILM & ESPET FILM) Transmission(Microscope)
199	UV042821HA46	13	Fragment	616	ATR-Polymer2	Polycarbonate	PC	D_PC	Polyethylene glycolORIGIN Date: 92/03/27 File: PETG.DXINFRARED SPECTROPHOTOMETER FTIR-8000 SERIES
200	UV042821HA48	7	Fragment	617	T-Polymer2	Polyvinylchloride	PVC	T_PVC with PhenoricSulfonicEster	Phenylsilicone rubberATR/diamond ATRcorrected
201	UV042821HA48	13	Fragment	617	ATR-Polymer2	Polycarbonate	PC	D_PC	PolyimideFilm
202	DR041120HR01	14	Fragment	618	T-Polymer2	Polycarbonate	PC	PC	Polyimide(Electronic Parts) DuraSamplIR-II
203	DR041120HT03	2	Fragment	618	T-Polymer2	Polyphenylene Sulfide	PPS	PPS	Polyimide(KAPTON) DuraSamplIR-II
204	DR041120HG02	10	Fragment	619	T-Polymer2	Polycarbonate	PC	T_PC2	Polyimide DuraSamplIR-II
205	UV042821HA04	10	Fragment	619	IRs Polymer2	Melamin	MEL	MELAMIN	Polyimide(Electronic Parts) DuraSamplIR-II
206	UV042821HA22	9	Fragment	619	ATR-Polymer2	Polycarbonate	PC	D_PC	Polyimide KAPTONFilm
207	UV042821HA52	14	Fragment	619	ATR-Polymer2	Polycarbonate	PC	D_PC	Polyimide(Electronic Parts) Transmission(Microscope)
208	DR041120HE02	4	Fragment	621	T-Polymer2	Silicon	Si	Silicon Grease	Polyimide(UPILEX) DuraSamplIR-II
209	DR041120HR01	2	Fragment	621	IRs Polymer2	Polycarbonate	PC	PC	Polyimide(UPILEX) DuraSamplIR-II
210	UV042821HA52	10	Fragment	622	T-Polymer2	Polycarbonate	PC	PC	Polyimide(KAPTON) DuraSamplIR-II
211	UV042821HA22	8	Fragment	624	T-Polymer2	Polycarbonate	PC	PC	Polyimide(UPILEX) DuraSamplIR-II
212	DR042821HA32	7	fragment	625	T-Polymer2	Polycarbonate	PC	PC	Polybutene DuraSamplIR-II	Polybutene is an organic polymer made from a mixture of 1-butene, 2-butene, and isobutylene. Ethylene steam cracker C4s are also used as supplemental feed for polybutene. It is similar to polyisobutylene (PIB), which is produced from essentially pure isobutylene made in a C4 complex of a major refinery.
213	DR042821HA32	12	fragment	626	ATR-Polymer2	Epoxy	EPX	Epoxy	Polyisoprene [-CH2CH(CH3)=CHCH2-]nFilm
214	DR041120HM01	3	Fragment	626	ATR-Polymer2	Polyvinylchloride	PVC	D_PVC with PhenoricSulfonicEster	Polyamide(Nylon12) DuraSamplIR-II
215	DR041120HM01	1	Fragment	628	ATR-Polymer2	Polycarbonate	PC	D_PC	Ramie FiberATR/diamond ATRcorrected
216	UV042821HA31	7	Fragment	628	ATR-Polymer2	Epoxy	EPX	Epoxy	Ramie FiberATR/diamond ATRcorrected
217	UV042821HA48	2	Fragment	628	T-Polymer2	Epoxy	EPX	Epoxy	Ramie DuraSamplIR-II
218	UV042821HA04	13	Fragment	629	T-Polymer2	Polycarbonate	PC	PC	Ramie Transmission(Microscope)
219	UV042821HA31	12	Fragment	629	T-Polymer2	Polycarbonate	PC	PC	Protein(Soy Bean Powder) Transmission(Microscope)
220	DR042821HA32	6	fragment	632	ATR-Polymer2	Polycarbonate	PC	D_PC	Poly(4-Methyl-1 Pentene) DuraSamplIR-II	Polymethylpentene (PMP), also known as poly(4-methyl-1-pentene), is a thermoplastic polyolefin. It is used for gas-permeable packaging, autoclavable medical and laboratory equipment, microwave components, and cookware.
221	DR041120HR01	4	Fragment	632	T-Polymer2	Polycarbonate	PC	PC	Poly(4-Methyl-1 Pentene) DuraSamplIR-II
222	UV042821HA11	3	Fragment	632	ATR-Polymer2	Polyphenylene Sulfide	PPS	D_PPS2	Polyacetal(Electronic Parts-2) DuraSamplIR-II	Polyoxymethylene (POM), also known as acetal,[4] polyacetal, and polyformaldehyde, is an engineering thermoplastic used in precision parts requiring high stiffness, low friction, and excellent dimensional stability.
223	UV042821HA04	20	Fragment	634	T-Polymer2	Tetrafluoroethylene	FEP	FEP	Polypropylene Film
224	DR042821HA32	5	fragment	635	T-Polymer2	Phenoxy	HRB	Herbicide	Polypropylene Film
225	DR041120HE02	5	Fragment	635	T-Polymer2	Polycarbonate	PC	PC	Polypropylene, Chlorinated(Chlorine content 65%) DuraSamplIR-II
226	UV042821HA12	15	Fragment	636	ATR-Polymer2	Polycarbonatephenylene PC	PC	D_PC	Polypropylene(PP) Transmission(Microscope)
227	UV042821HA04	12	Fragment	637	T-Polymer2	Polycarbonate	PC	PC	Poly(Ethylene Oxide) DuraSamplIR-II
228	UV042821HA04	19	Fragment	637	T-Polymer2	Polycarbonate	PC	PC	Polyphenylene Oxide(Polyphenylene Ether)/Polyamide(PPO/PA NORYL) DuraSamplIR-II
229	UV042821HA52	4	Fragment	637	ATR-Polymer2	Epoxy	EPX	Epoxy	Polyphenylene Sulfie(PPS) Transmission(Microscope)
230	DR041120HT03	9	Fragment	638	T-Polymer2	Polycarbonate	PC	PC	Polyphenylene Sulfie(PPS) Transmission(Microscope)
231	UV042821HA31	2	Fragment	640	T-Polymer2	Polycarbonate	PC	PC	Polyphenylene Sulfide(PPS) DuraSamplIR-II
232	UV042821HA52	1	Fragment	640	T-Polymer2	Polycarbonate	PC	PC	Poly(Phenylene Sulfide) DuraSamplIR-II
233	DR041120HT03	4	Fragment	641	T-Polymer2	Polyacetylene	PAC	Polyacetylene	PPS Film
234	UV042821HA04	14	Fragment	641	ATR-Polymer2	Polycarbonatephenylene PC	PC	D_PC	PPSFilm
235	UV042821HA04	11	Fragment	642	T-Polymer2	Polycarbonate	PC	PC	Polyphenylene Sulfie(PPS) Transmission(Microscope)
236	DR041120HE02	9	Fragment	644	T-Polymer2	Polycarbonate	PC	PC	PPSFilm
237	DR041120HG06	7	Fragment	644	ATR-Polymer2	Polycarbonatephenylene PC	PC	D_PC	Polyphenylene Sulfie(PPS) Transmission(Microscope)
238	DR041120HG06	13	Fragment	644	ATR-Polymer2	Polycarbonatephenylene PC	PC	D_PC	PPS Film
239	DR041120HJ03	6	Fragment	645	ATR-Polymer2	Polycarbonatephenylene PC	PC	D_PC	Polyphenylene Sulfide (PPS) DuraSamplIR-II
240	DR041120HT03	10	Fragment	645	ATR-Polymer2	Polycarbonatephenylene PC	PC	D_PC	Poly(Phenylene Sulfide) DuraSamplIR-II
241	DR041120HG06	18	Fragment	647	T-Polymer2	Polycarbonate	PC	PC	Polyphenylene Sulfie(PPS) Transmission(Microscope)
242	DR041120HR01	12	Fragment	647	ATR-Polymer2	Polycarbonatephenylene PC	PC	D_PC	Poly(Phenylene Sulfide) DuraSamplIR-II
243	DR041120HG02	9	Fragment	649	T-Polymer2	Polycarbonate	PC	T_PC2	Polystyrene(PS) Transmission(Microscope)
244	DR041120HM01	11	Fragment	651	T-Polymer2	Polycarbonate	PC	PC	PolystyreneATR/diamond ATRcorrected
245	UV042821HA04	15	Fragment	652	T-Polymer2	Ramie	PLT	RAMIE Plant Fiber Organic	PolystyreneATR/diamond ATRcorrected
246	UV042821HA04	18	Fragment	654	T-Polymer2	Polycarbonate	PC	PC	PolystyreneATR/diamond ATRcorrected
247	DR041120HR01	8	Fiber	656	T-Polymer2	Polycarbonate	PC	T_PC2	PolystyreneATR/diamond ATRcorrected
248	DR041120HT03	7	Fragment	656	IRs Polymer2	Nylon	NYL	Nylon	PolystyreneFilm
249	DR041120HT03	6	Fragment	657	IRs Polymer2	Polycarbonatephenylene ROMATR	PC	PC	Polysulfone DuraSamplIR-II	Polysulfones are a family of high performance thermoplastics. These polymers are known for their toughness and stability at high temperatures.
250	DR041120HR01	13	Fragment	658	T-Polymer2	Paper	PAP	Paper	Polysulfone DuraSamplIR-II
251	DR041120HE02	1	Fragment	659	T-Polymer2	Polycarbonate	PC	T_PC2	Poly(Tetrafluoroethylene) DuraSamplIR-II
252	UV042821HA04	9	Fragment	660	T-Polymer2	Polycarbonate	PC	PC	Polyurethane FormATR/ZnSe ATRcorrected
253	DR041120HG06	20	Fragment	663	IRs Polymer2	Low Density Polyethylene	LDPE	LDPE	Polyvinylchloride with Phenolic ester of aliphatic sulfonic acid Transmission(Microscope)
254	UV042821HA04	6	Fragment	664	T-Polymer2	Polycarbonate	PC	PC	PVDC,Poly (vinylidene chloride) /wlap filmATR/diamond ATRcorrected
255	UV042821HA04	8	Fragment	664	IRs Polymer2	Polycarbonatephenylene ROMATR	PC	PC	Poly(Vinyl Chloride)(PVC), Carboxylated(Carboxyl content 1.8%) DuraSamplIR-II
256	DR041120HR01	9	Fragment	666	T-Polymer2	Polycarbonate	PC	PC	Polyvinylchloride with BIS(2-Ehylhexyl)Terephthalate DuraSampllR
257	UV042821HA05	19	Fragment	667	T-Polymer2	Polycarbonate	PC	PC	Polyvinylchloride with Phthalate DuraSampllR
258	UV042821HA12	16	Fragment	669	T-Polymer2	Polycarbonate	PC	PC	Polyvinylchloride with Phenolic ester of aliphatic sulfonic acid Transmission(Microscope)
259	UV042821HA46	15	Fragment	669	T-Polymer2	Polycarbonate	PC	PC	Polyvinylchloride with Phenolic ester of aliphatic sulfonic acid DuraSampllR
260	UV042821HA04	17	Fragment	677	ATR-Polymer2	Polycarbonatephenylene PC	PC	D_PC	PVDC,Poly (vinylidene chloride) /wlap filmATR/diamond ATRcorrected
261	UV042821HA48	14	Fragment	681	T-Polymer2	Polyacetylene	PAC	Polyacetylene organic polymer	Polyvinylidene Fluoride(PVDF) Transmission(Microscope)
262	UV042821HA12	9	Fragment	682	ATR-Polymer2	Polycarbonatephenylene PC	PC	D_PC	Polyvinylindene Fluoride(PVDF) DuraSamplIR-II
263	UV042821HA48	6	Fragment	687	IRs Polymer2	Nylon	NYL	Nylon	Polyvinylindene Fluoride(PVDF) DuraSamplIR-II
264	UV042821HA22	3	Fragment	690	ATR-Polymer2	Polycarbonatephenylene PC	PC	D_PC	Butyl rubber with salt(salt:1540,1016,876cm-1)ATR/diamond ATRcorrected	Butyl rubber, sometimes just called "butyl", is a synthetic rubber, a copolymer of isobutylene with isoprene. The abbreviation IIR stands for isobutylene isoprene rubber. Polyisobutylene, also known as "PIB" or polyisobutene, (C4H8)n,
265	UV042821HA22	7	Fragment	692	IRs Polymer2	Lanoline Film	WOIL	LANOLINE Wool Oil	trans-Polyisoprene Rubber(IR-trans) Transmission(Microscope)	Natural Rubber
266	UV042821HA34	5	Fragment	694	ATR-Polymer2	Polycarbonatephenylene PC	PC	D_PC	cis-Polyisoprene Rubber(IR-cis) DuraSamplIR-II	Natural Rubber
267	DR041120HE02	7	Fragment	695	ATR-Polymer2	Polycarbonatephenylene PC	PC	D_PC2	Butyl rubber with salt(salt:1540,1016,876cm-1)ATR/diamond ATRcorrected	Butyl rubber, sometimes just called "butyl", is a synthetic rubber, a copolymer of isobutylene with isoprene. The abbreviation IIR stands for isobutylene isoprene rubber. Polyisobutylene, also known as "PIB" or polyisobutene, (C4H8)n, is the homopolymer of isobutylene, or 2-methyl-1-propene, on which butyl rubber is based.
268	DR041120HG06	5	Fragment	696	T-Polymer2	Polycarbonate	PC	PC	Polyisoprene, Chlorinated(Chlorine content 65%) DuraSamplIR-II	RUBBER CHLORINATED;POLYISOPRENE, CHLORINATED;chloroisoprene homopolymer;POLYISOPRENE, CHLORINATED ISO 9001：2015 REACH;1,3-Butadiene,2-methyl-,homopolymer,chlorinated;Chloriertes Polyisopren
269	DR042821HA32	10	fragment	698	ATR-Polymer2	Polycarbonatephenylene PC	PC	D_PC	trans-Polyisoprene Rubber(IR-trans) DuraSamplIR-II
270	UV042821HA04	7	Fragment	702	ATR-Polymer2	Polycarbonatephenylene PC	PC	D_PC	Styrene/Butadiene(SB) SBS Block Copolymer(Styrene content 30%) DuraSamplIR-II
271	DR041120HR01	7	Fragment	703	T-Polymer2	Polycarbonate	PC	PC	SBS Film
272	DR041120HE02	8	Fragment	708	ATR-Polymer2	Polycarbonatephenylene PC	PC	D_PC	Silicon Grease Transmission(Microscope)
273	UV042821HA52	3	Fragment	710	T-Polymer2	Polycarbonate	PC	PC	Silicon Grease Transmission(Microscope)
274	UV042821HA05	22	Fragment	718	ATR-Polymer2	Polycarbonatephenylene PC	PC	D_PC	Silicone rubberATR/diamond ATRcorrected
275	UV042821HA52	17	Fragment	720	T-Polymer2	Polycarbonate	PC	T_PC2	Silicon Grease Transmission(Microscope)
276	DR041120HR01	5	Fragment	729	T-Polymer2	Polycarbonate	PC	PC	Styrene/Maleic Anhydride Copolymer(50/50 Copolymer) DuraSamplIR-II	Styrene maleic anhydride (SMA or SMAnh) is a synthetic polymer that is built-up of styrene and maleic anhydride monomers. In one copolymer, the monomers can be almost perfectly alternating.
277	DR041120HT03	1	Fragment	768	T-Polymer2	Protein	PLT	Soy Bean Powder	Styrene-Ethylene-Butylene Transmission(Microscope)	Styrene is an organic compound with the chemical formula C6H5CH=CH2. Its structure consists of a vinyl group as substituent on benzene.
278	UV042821HA48	10	Fragment	787	IRs Polymer2	Low Density Polyethylene Film	LDPE	LDPE	Lanoline Film
279	DR041120HG06	2	Duplicate
280	UV042821HA04	2	Duplicate
281	UV042821HA05	10	Duplicate

## Sheet: Graphs by Hailstone
count	Sample	number	Type	Score	Maximum Hits	Type	Abbreviation	Library	Comment			Microplastic Type	Count		count	Sample	number	Type	Score	Maximum Hits	Type	Abbreviation	Library		MP Abbr Type
1	UV042821HA34	3	Fiber	564	ATR-Polymer2	Sanol LS770	LS770	Polymer Additive	Acrylic Adhesive Transmission(Microscope)			ACR	1		251	DR041120HE02	1	Fragment	659	T-Polymer2	Polycarbonate	PC	T_PC2		BMC	1
2	UV042821HA46	2	Fiber	566	IRs Polymer2	Polyethersulfone	PES	PES	Poly(alpha-Methylstyrene) DuraSamplIR-II	α-Methylstyrene (AMS) is an organic compound with the formula C6H5C(CH3)=CH2. It is a colorless oil.[4]		AMS	1		135	DR041120HE02	2	Fragment	596	IRs Polymer2	POLYETHYLENE	PEG	PETG-20		BR3	1
3	DR042821HA32	3	fiber	569	IRs Polymer2	Polyimide	PI	PI2 (PI)	Aramid Fiber DuraSamplIR-II	Aramid fibers, short for aromatic polyamide, are a class of heat-resistant and strong synthetic fibers. They are used in aerospace and military applications, for ballistic-rated body armor fabric and ballistic composites, in marine cordage, marine hull reinforcement, as an asbestos substitute,[1] and in various lightweight consumer items ranging from phone cases to tennis rackets.		ARA	1		178	DR041120HE02	3	Fragment	606	ATR-Polymer2	Polybutadiene	BR3	D_1_2_Polybutadiene		PC	5
4	DR041120HG02	6	Fiber	569	T-Polymer2	Polyetheretherketone	PEEK	PEEK	Butyl Methacrylate/Isobutyl Methacrylate Copolymer(50:50) DuraSamplIR-II			BMC	1		208	DR041120HE02	4	Fragment	621	T-Polymer2	Silicon	Si	Silicon Grease		PEG	2
5	DR041120HT03	11	Fiber	569	T-Polymer2	Polybutadiene	BR3	High-trans Polybutadiene	High-trans Butadiene Rubber(High-trans Polubutadiene) DuraSamplIR-II			BR3	14		225	DR041120HE02	5	Fragment	635	T-Polymer2	Polycarbonate	PC	PC		PEI	1
6	DR041120HJ28	1	Fiber	570	T-Polymer2	Polyethylene	HDPE	T_HDPE	High-trans Butadiene Rubber(High-trans Polybutadiene) Transmission(Microscope)	Synthetic Rubber Polybutadiene [butadiene rubber, BR]		DLTDP	4		19	DR041120HE02	6	Fiber	576	ATR-Polymer2	Polyethylene glycol	PEG	D_Polyethyleneglycol		PUR	1
7	DR041120HR01	3	Fiber	570	T-Polymer2	Polystyrene	PS	PS	1,2-Polybutadiene Transmission(Microscope)			EPX	23		267	DR041120HE02	7	Fragment	695	ATR-Polymer2	Polycarbonatephenylene PC	PC	D_PC2		Si	1
8	UV042821HA22	13	Fiber	570	ATR-Polymer2	Polyimide	PI	D_PI3	Polybutadiene High-transFilm			EVA	1		272	DR041120HE02	8	Fragment	708	ATR-Polymer2	Polycarbonatephenylene PC	PC	D_PC			12
9	UV042821HA48	9	Fiber	570	ATR-Polymer2	Polyetheretherketone	PEEK	D_PEEK	High-trans Butadiene Rubber(High-trans Polybutadiene) Transmission(Microscope)			FEP	2		236	DR041120HE02	9	Fragment	644	T-Polymer2	Polycarbonate	PC	PC
10	UV042821HA11	1	Film	571	IRs Polymer2	Polypropylene	PP	PP	Polybutadiene High-transFilm			HDPE	2		16	DR041120HE02	10	Fragment	575	IRs Polymer2	Polyurethane	PUR	URETHAN
11	DR041120HJ28	3	Fiber	572	IRs Polymer2	Epoxy	EPX	Epoxy	1,2-Polybutadiene Transmission(Microscope)			HLAS	2		22	DR041120HE02	11	Fiber	577	ATR-Polymer2	Butyl Methacrylate	BMC	D_ButylMethacrylate_IsobutylMethacrylate
12	UV042821HA34	7	Fiber	572	T-Polymer2	Silicon	Si	Silicon Grease	1,2-Polybutadiene Transmission(Microscope)			HRB	4		113	DR041120HE02	12	Fragment	592	IRs Polymer2	Polyetherimide	PEI	PEI
13	UV042821HA04	5	Fragment	573	ATR-Polymer2	Irganox 1010	PA	Phenolic Antioxidant	1,2-Polybutadiene Transmission(Microscope)			IIR	1												MP Abbr Type
14	UV042821HA52	16	Film	574	IRs Polymer2	Polyethersulfone	PES	PES	1,2-Polybutadiene DuraSamplIR-II Synthetic Rubber			LDPE	3		143	DR041120HG02	1	Fragment	598	ATR-Polymer2	Polycarbonate	PC	D_PC2		PB1	1
15	DR042821HA32	1	fiber	575	IRs Polymer2	Polystyrene	PS	PS	High-cis Butadiene Rubber(High-cis Polybutadiene) DuraSamplIR-II			LS770	4		160	DR041120HG02	2	Fragment	601	IRs Polymer2	PEEK Film	PEEK	PEEK		PC	3
16	DR041120HE02	10	Fragment	575	IRs Polymer2	Polyurethane	PUR	URETHAN	High-trans Butadiene Rubber(High-trans Polubutadiene) DuraSamplIR-II			MEL	1		85	DR041120HG02	3	Drop	589	T-Polymer2	Silicon	Si	Silicon Grease		PEEK	2
17	UV042821HA05	4	Fiber	575	ATR-Polymer2	Polyethylene glycol	PEG	D_Polyethyleneglycol	1,2-Polybutadiene DuraSamplIR-II			NYL	4		68	DR041120HG02	4	Fiber	586	ATR-Polymer2	Poly (1-Butene)	PB1	D_Poly_1_Butene		PEG	1
18	UV042821HA05	16	Fiber	575	IRs Polymer2	Polystyrene	PS	PS	1,2-Polybutadiene Transmission(Microscope)			PA	16		94	DR041120HG02	5	Fiber	590	IRs Polymer2	Ramie	PLT	RAMIE Plant Fiber Organic		PLT	1
19	DR041120HE02	6	Fiber	576	ATR-Polymer2	Polyethylene glycol	PEG	D_Polyethyleneglycol	DLTDPANTIOXIDANT (CONTAINING SULFUR)DILAURYL THIODIPROPIONATEC30H58O4SCAS NO. 123-28-4ATR/diamond ATRcorrected			PAC	3		4	DR041120HG02	6	Fiber	569	T-Polymer2	Polyetheretherketone	PEEK	PEEK		Si	2
20	UV042821HA11	4	Fiber	576	IRs Polymer2	Polystyrene	PS	PS	DLTDPANTIOXIDANT (CONTAINING SULFUR)DILAURYL THIODIPROPIONATEC30H58O4SCAS NO. 123-28-4ATR/diamond ATRcorrected			PAM	1		154	DR041120HG02	7	Fragment	600	IRs Polymer2	POLYETHYLENE	PEG	PETG-20			10
21	UV042821HA31	8	Fiber	576	T-Polymer2	Polyphenylene	PPS	PPS	DLTDPANTIOXIDANT (CONTAINING SULFUR)DILAURYL THIODIPROPIONATEC30H58O4SCAS NO. 123-28-4ATR/diamond ATRcorrected			PAP	1		174	DR041120HG02	8	Fragment	605	IRs Polymer2	Silicone	Si	SILICO2
22	DR041120HE02	11	Fiber	577	ATR-Polymer2	Butyl Methacrylate	BMC	D_ButylMethacrylate_IsobutylMethacrylate	DLTDPANTIOXIDANT (CONTAINING SULFUR)DILAURYL THIODIPROPIONATEC30H58O4SCAS NO. 123-28-4ATR/diamond ATRcorrected			PAR	2		243	DR041120HG02	9	Fragment	649	T-Polymer2	Polycarbonate	PC	T_PC2
23	UV042821HA05	5	Fiber	577	IRs Polymer2	Butyl Rubber	RUBB	BUTYL_RB	Epoxy resin (liquid)ATR/diamond ATRcorrected			PB1	1		204	DR041120HG02	10	Fragment	619	T-Polymer2	Polycarbonate	PC	T_PC2
24	UV042821HA34	15	Fiber	577	IRs Polymer2	Irganox 1330	PA	Phenolic Antioxidant	Epoxy Resin(Electronic Parts-3) Transmission(Microscope)			PBT	2												MP Abbr Type
25	UV042821HA48	15	Fragment	577	T-Polymer2	Polybutylene Terephthalate	PBT	PBT	Epoxy Adhesives Transmission(Microscope)			PC	75		35	DR041120HG06	1	Fiber	580	ATR-Polymer2	Polyisoprene Rubber	RUBB	D_IR-cis		BR3	1
26	DR041120HR01	17	Fiber	578	T-Polymer2	Acrylic	ACR	Acrylic Adhesive	Epoxy Adhesives Transmission(Microscope)			PCL	1		279	DR041120HG06	2	Duplicate							HRB	2
27	UV042821HA04	3	Fiber	578	ATR-Polymer2	Poly(Tetrafluoroethylene)	PTFE2	D_PTFE2	Epoxy Resin Transmission(Microscope)			PDI	1		69	DR041120HG06	3	Fiber	586	IRs Polymer2	Butyl Rubber	RUBB	BUTYL_RB		LDPE	1
28	UV042821HA31	1	Fiber	578	ATR-Polymer2	Polyimide	PI	D_PI2	Epoxy Adhesives DuraSamplIR-II			PEEK	3		61	DR041120HG06	4	Fiber	584	ATR-Polymer2	Polyimide	PI	D_PI3		PAC	1
29	UV042821HA31	10	Fragment	578	T-Polymer2	Polyisoprene Rubber	RUBB	IR-trans	Epoxy Resin(Electronic Parts-2) Transmission(Microscope)			PEG	10		268	DR041120HG06	5	Fragment	696	T-Polymer2	Polycarbonate	PC	PC		PC	8
30	DR041120HM01	2	Fiber	579	T-Polymer2	Polyester	PET	Polyester	Epoxy Adhesives Transmission(Microscope)			PEI	3		95	DR041120HG06	6	Fragment	590	T-Polymer2	Polycarbonate	PC	PC		PES	1
31	DR041120HT03	12	Fiber	579	IRs Polymer2	Irganox 1010	PA	Phenolic Antioxidant	Epoxy Resin Transmission(Microscope)			PEPQ	3		237	DR041120HG06	7	Fragment	644	ATR-Polymer2	Polycarbonatephenylene PC	PC	D_PC		PI	1
32	UV042821HA05	2	Unknown	579	T-Polymer2	Polyphenylene	PPP	PPS	Epoxy Adhesives Transmission(Microscope)			PES	3		51	DR041120HG06	8	Can't See	582	ATR-Polymer2	Polyamide	PLT	D_Polyamide6 wool & Silk I call in Plant		PLT	1
33	UV042821HA05	14	Fiber	579	ATR-Polymer2	Sanol LS770	LS770	Polymer Additive	Epoxy Resin(Electronic Parts-3) Transmission(Microscope)			PET	4		185	DR041120HG06	9	Fragment	607	T-Polymer2	Polyacetylene	PAC	Polyacetylene		PVDF	1
34	UV042821HA12	1	Fiber	579	T-Polymer2	Polyvinylchloride	PVC	T_PVC with PhenoricSulfonicEster	Epoxy Resin(Electronic Parts-3) Transmission(Microscope)			PETG	1		136	DR041120HG06	10	Fiber	596	ATR-Polymer2	Polyethersulfone	PES	D_PES		RUBB	2
35	DR041120HG06	1	Fiber	580	ATR-Polymer2	Polyisoprene Rubber	RUBB	D_IR-cis	Epoxy Adhesives Transmission(Microscope)			PHSI	1		65	DR041120HG06	11	Fiber	585	ATR-Polymer2	Polyvinylindene Flouride	PVDF	D_PVDF		STR	1
36	DR041120HG06	12	Fragment	580	T-Polymer2	Phenoxy	HRB	Herbicide	Epoxy Resin Transmission(Microscope)			PI	11		36	DR041120HG06	12	Fragment	580	T-Polymer2	Phenoxy	HRB	Herbicide			20
37	DR041120HJ03	3	Fragment	580	IRs Polymer2	Nylon	NYL	Nylon	Epoxy Resin Transmission(Microscope)			PIB	1		238	DR041120HG06	13	Fragment	644	ATR-Polymer2	Polycarbonatephenylene PC	PC	D_PC
38	DR041120HT03	8	Fiber	580	ATR-Polymer2	Polycaprolac tone	PCL	D_Polycaprolactone	Epoxy Resin Transmission(Microscope)			PIP	1		52	DR041120HG06	14	Fragment	582	T-Polymer2	Styrene	STR	Styrene-Ethylene-Butylene
39	UV042821HA05	6	Fiber	580	T-Polymer2	Epoxy	EPX	Epoxy	Epoxy Resin(Electronic Parts-1) Transmission(Microscope)			PLT	6		168	DR041120HG06	15	Fragment	603	ATR-Polymer2	Polycarbonate	PC	D_PC
40	UV042821HA05	7	Fiber	580	T-Polymer2	Polydiallyl Isophthalate	PDI	T_Polydiallyl_Isophthalate	Epoxy Resin(Electronic Parts-1) DuraSamplIR-II			PMP	2		79	DR041120HG06	16	Fragment	588	ATR-Polymer2	Polycarbonate	PC	D_PC2
41	UV042821HA46	4	Fragment	580	IRs Polymer2	P-EPQANTIOXIDANT PHOSPHONITE	PEPQ	P-EPQ	Epoxy Resin DuraSamplIR-II			POM	1		161	DR041120HG06	17	Fragment	601	T-Polymer2	Phenoxy	HRB	Herbicide
42	UV042821HA46	16	Fragment	580	ATR-Polymer2	Polyester	PET	D_Polyester2	Epoxy Resin DuraSamplIR-II			PP	4		241	DR041120HG06	18	Fragment	647	T-Polymer2	Polycarbonate	PC	PC
43	DR042821HA32	2	fragment	581	ATR-Polymer2	Polyalpha Methylstyrene	PAM	D_Poly_alpha_Methylstyrene	Epoxy Resin(Electronic Parts-1) DuraSamplIR-II			PPO	2		114	DR041120HG06	19	Fragment	592	T-Polymer2	Polycarbonate	PC	PC
44	UV042821HA04	21	Fiber	581	ATR-Polymer2	Polybutadiene	BR3	D_1_2_Polybutadiene Synthetic Rubber	Epoxy Resin Transmission(Microscope)			PPP	1		253	DR041120HG06	20	Fragment	663	IRs Polymer2	Low Density Polyethylene	LDPE	LDPE
45	UV042821HA11	6	Fragment	581	IRs Polymer2	Polyisoprene	PIP	PIP	Epoxy Resin DuraSamplIR-II			PPS	13		191	DR041120HG06	21	Fragment	611	T-Polymer2	Polybutadiene	BR3	T_1_2_Polybutadiene
46	UV042821HA12	3	Fragment	581	T-Polymer2	Epoxy	EPX	Epoxy	Ethylene/Vinyl Acetate(EVA) Copolymer(Vinyl Acetate content 40%) Transmission(Microscope)			PS	6												MP Abbr Type
47	UV042821HA12	6	Fragment	581	T-Polymer2	Polyarylate	PAR	PAR	FEP,Tetrafluoroethylene HexafluoropropyleneATR/diamond ATRcorrected			PSO	2		86	DR041120HJ03	1	Fiber	589	IRs Polymer2	Polybutadiene	BR3	BR3		BR3	1
48	UV042821HA34	13	Fragment	581	IRs Polymer2	Polyethylene Glycol	PETG	PETG	Tetrafluoroethylene-Hexafluoropropylene(FEP) Transmission(Microscope)			PTFE2	1		104	DR041120HJ03	2	Fiber	591	ATR-Polymer2	Styrene Maleic Anhydride	SMA	D_Styrene_Maleic_Anhydride		LS770	1
49	UV042821HA46	7	Fragment	581	ATR-Polymer2	Polyimide	PI	D_PI4	High Density Polyethylene(HDPE) Transmission(Microscope)			PUR	1		37	DR041120HJ03	3	Fragment	580	IRs Polymer2	Nylon	NYL	Nylon		NYL	1
50	UV042821HA52	15	Fiber	581	ATR-Polymer2	Nylon	NYL	Nylon	High Density Polyethylene(HDPE) Transmission(Microscope)			PVC	7		53	DR041120HJ03	4	Fragment	582	IRs Polymer2	Sanol LS770	LS770	SanolLS770		PC	1
51	DR041120HG06	8	Can't See	582	ATR-Polymer2	Polyamide	PLT	D_Polyamide6 wool & Silk I call in Plant	Chimassorb 944LDHINDERED AMINE LIGHT STABILIZER (POLYMERIC)CAS NO. 71878-19-8ATR/diamond ATRcorrected	Chimassorb® 944 is a high molecular weight hindered amine light stabilizer (HALS). It shows excellent compatibility, good resistance to extraction and low volatility.		PVDC	1		105	DR041120HJ03	5	Fragment	591	IRs Polymer2	Polyetherimide	PEI	PEI		PEG	1
52	DR041120HG06	14	Fragment	582	T-Polymer2	Styrene	STR	Styrene-Ethylene-Butylene	Polymer Additive(Chimassorb 944LD) DuraSamplIR-II			PVDF	3		239	DR041120HJ03	6	Fragment	645	ATR-Polymer2	Polycarbonatephenylene PC	PC	D_PC		PEI	1
53	DR041120HJ03	4	Fragment	582	IRs Polymer2	Sanol LS770	LS770	SanolLS770	Phenoxy Resin Transmission(Microscope)			RUBB	6		73	DR041120HJ03	7	Fragment	587	T-Polymer2	Polyethylene	PEG	PEG		SMA	1	7
54	DR041120HJ28	2	Fiber	582	T-Polymer2	Polycarbonate	PC	PC	Phenoxy Resin Transmission(Microscope)	Phenoxy herbicides (or "phenoxies") are two families of chemicals that have been developed as commercially important herbicides, widely used in agriculture. They share the part structure of phenoxyacetic acid		SB	1												MP Abbr Type
55	UV042821HA05	15	Fiber	582	ATR-Polymer2	Polyphenylene sulfide	PPS	D_PPS	Phenoxy Resin Transmission(Microscope)	Phenoxy herbicides (or "phenoxies") are two families of chemicals that have been developed as commercially important herbicides, widely used in agriculture. They share the part structure of phenoxyacetic acid		SBS	1		6	DR041120HJ28	1	Fiber	570	T-Polymer2	Polyethylene	HDPE	T_HDPE		EPX	1
56	UV042821HA05	21	Fragment	582	IRs Polymer2	Phenylsilicone	PHSI	PHSI	Phenoxy Resin Transmission(Microscope)	Phenoxy herbicides (or "phenoxies") are two families of chemicals that have been developed as commercially important herbicides, widely used in agriculture. They share the part structure of phenoxyacetic acid		Si	4		54	DR041120HJ28	2	Fiber	582	T-Polymer2	Polycarbonate	PC	PC		HDPE	1
57	UV042821HA31	5	Fragment	582	IRs Polymer2	Polypropylene	PP	PP	IIR(Isobutylene-Isoprene Rubber) DuraSamplIR-II			SMA	1		11	DR041120HJ28	3	Fiber	572	IRs Polymer2	Epoxy	EPX	Epoxy		PC	1
58	DR041120HR01	16	Fiber	583	ATR-Polymer2	Polyphenlene Sulfide	PPS	D_PPS2	Low Density PolyethyleneFilm			STR	1		106	DR041120HJ28	4	Fiber	591	IRs Polymer2	Tetrakis(2,4-di-tert-butylphenyl) (1,1-biphenyl)-4,4'-diylbisphosphonite	PEPQ	P-EPQ		PEPQ	1
59	UV042821HA12	14	Fragment	583	T-Polymer2	Polyvinylindene Flouride	PVDF	PVDF	Low Density PolyethyleneFilm			WOIL	1		149	DR041120HJ28	5	Fiber	599	T-Polymer2	Polyester	PET	Polyester		PET	1	5
60	UV042821HA31	6	Fiber	583	ATR-Polymer2	Irganox 1010	PA	Phenolic Antioxidant	Low Density PolyethyleneFilm																MP Abbr Type
61	DR041120HG06	4	Fiber	584	ATR-Polymer2	Polyimide	PI	D_PI3	Polymer Additive(Sanol LS770) DuraSamplIR-II	LS 770 is recommended to be used in polypropylene, impact modified PP(TPO),EPDM, polystyrene ,impact polystyrene ABS,SAN,ASA and polyurethanes and is also effective in polyamides and polyacetals. LS 770 is a low molecular weight hindered amine light stabilizer that provides excellent light stability for thick sections and films in the recommended substrates.					215	DR041120HM01	1	Fragment	628	ATR-Polymer2	Polycarbonate	PC	D_PC		BR3	1
62	UV042821HA04	16	Fiber	584	ATR-Polymer2	Polyethylene glycol	PEG	D_Polyethyleneglycol	Polymer Additive(Sanol LS770) DuraSamplIR-II	LS 770 is recommended to be used in polypropylene, impact modified PP(TPO),EPDM, polystyrene ,impact polystyrene ABS,SAN,ASA and polyurethanes and is also effective in polyamides and polyacetals. LS 770 is a low molecular weight hindered amine light stabilizer that provides excellent light stability for thick sections and films in the recommended substrates.					30	DR041120HM01	2	Fiber	579	T-Polymer2	Polyester	PET	Polyester		EPX	1
63	UV042821HA46	1	Fiber	584	IRs Polymer2	Polyvinylchloride	PVC	PVDC	Sanol LS770HINDERED AMINE LIGHT STABILIZERBIS(2,2,6,6-TETRAMETHYL-4-PIPERIDYL)SEBACATEC28H52N2O4CAS NO. 52829-07-9ATR/diamond ATRcorrected						214	DR041120HM01	3	Fragment	626	ATR-Polymer2	Polyvinylchloride	PVC	D_PVC with PhenoricSulfonicEster		HLAS	1
64	DR042821HA32	4	fiber	585	T-Polymer2	Epoxy	EPX	Epoxy	Polymer Additive(Sanol LS770) DuraSamplIR-II						107	DR041120HM01	4	Fragment	591	ATR-Polymer2	Irganox MD 1024	PA	Phenolic Antioxidant		PA	1
65	DR041120HG06	11	Fiber	585	ATR-Polymer2	Polyvinylindene Flouride	PVDF	D_PVDF	Melamin FormATR/diamond ATRcorrected	Melamine /ˈmɛləmiːn/ ⓘ is an organic compound with the formula C3H6N6. This white solid is a trimer of cyanamide, with a 1,3,5-triazine skeleton. Like cyanamide, it contains 66% nitrogen by mass, and its derivatives have fire-retardant properties due to its release of nitrogen gas when burned or charred.					128	DR041120HM01	5	Fragment	595	IRs Polymer2	Chimassorb 944LD	HLAS	Chimassorb 944LD		PC	2
66	UV042821HA46	3	Fragment	585	ATR-Polymer2	polypropylene	PP	D_PP_Chlorinated	Nylon 6 ATR/diamond ATRcorrected						186	DR041120HM01	6	Fragment	607	ATR-Polymer2	Polysulfone	PSO	D_Polysulfone		PET	2
67	UV042821HA48	3	Fragment	585	IRs Polymer2	Irganox MD1024	PA	Phenolic Antioxidant	Nylon 6/12(Polyhexamethylene dodecanediamide) DuraSamplIR-II	Duplicte # 7					125	DR041120HM01	7	Fiber	594	T-Polymer2	Polybutadiene	BR3	T_1_2_Polybutadiene		PPS	1
68	DR041120HG02	4	Fiber	586	ATR-Polymer2	Poly (1-Butene)	PB1	D_Poly_1_Butene	Nylon MXD6Film						197	DR041120HM01	8	Fragment	615	ATR-Polymer2	Polyphenylene Sulfide	PPS	D_PPS2		PSO	1
69	DR041120HG06	3	Fiber	586	IRs Polymer2	Butyl Rubber	RUBB	BUTYL_RB	Nylon 11 [-NH(CH2)10CO-]nFilm						74	DR041120HM01	9	Fragment	587	T-Polymer2	Epoxy	EPX	Epoxy		PVC	1
70	UV042821HA05	8	Fiber	586	IRs Polymer2	Low	LDPE	LLDPE1	Polymer Additive(Irganox 1010) DuraSamplIR-II	Irganox® 1010 is a sterically hindered phenolic antioxidant designed to protects organic substrates such as plastics, synthetic fibers, elastomers against thermo-oxidative degradation.					80	DR041120HM01	10	Fiber	588	ATR-Polymer2	Polyester	PET	D_Polyester4			11
71	UV042821HA11	2	Fragment	586	ATR-Polymer2	Irganox 1076	PA	Phenolic Antioxidant	Irganox 1330 ANTIOXIDANT (Penol)C54H78O31,3,5-TRIMETHYL-2,4,6-TRIS(3,5-DI-tert-BUTYL-4-HYDROXYBENZYL)BENZENECAS NO. 1709-70-2ATR/diamond ATRcorrected	Irganox® 1330 is a hindered phenolic antioxidant designed for processing and long-term thermal stabilization. It is a highly effective stabilizer for organic substrates such as polymers, synthetic fibers and elastomers.					244	DR041120HM01	11	Fragment	651	T-Polymer2	Polycarbonate	PC	PC
72	UV042821HA34	11	Fragment	586	ATR-Polymer2	Polysulfone	PSO	D_Polysulfone	Irganox1010ANTIOXIDANT(Phenol)C73H108O12CAS NO. 6683-19-8ATR/diamond ATRcorrected	Irganox® 1010 is a sterically hindered phenolic antioxidant designed to protects organic substrates such as plastics, synthetic fibers, elastomers against thermo-oxidative degradation.															MP Abbr Type
73	DR041120HJ03	7	Fragment	587	T-Polymer2	Polyethylene	PEG	PEG	Polymer Additive(Irganox 1010) DuraSamplIR-II	a sterically hindered phenolic antioxidant – is a highly effective,non discoloring stabilizer for organic substrates such as plastics, synthetic fibers, elastomers, adhesives, waxes, oils and fats.					75	DR041120HR01	1	Fiber	587	T-Polymer2	Polybutadiene	BR3	T_1_2_Polybutadiene		ACR	1
74	DR041120HM01	9	Fragment	587	T-Polymer2	Epoxy	EPX	Epoxy	Irganox MD1024 HINDERED PHENOLIC ANTIOXIDANT-METAL DEACTIVATOR1,2-BIS(3,5-DI-tert-BUTYL-4-HYDROXYHYDROCINNAMOYL)HYDRAZINE; HINDERED PHENOLC34H52O4N2CAS NO. 32687-78-8ATR/diamond ATRcorrected						209	DR041120HR01	2	Fragment	621	IRs Polymer2	Polycarbonate	PC	PC		BR3	2
75	DR041120HR01	1	Fiber	587	T-Polymer2	Polybutadiene	BR3	T_1_2_Polybutadiene	Polymer Additive(Irganox 1076) DuraSamplIR-II	a sterically hindered phenolic antioxidant, is a highly efficient, non-discoloring stabilizer for organic substrates such as plastics, synthetic fibers, elastomers, adhesives, waxes, oils and fats.					7	DR041120HR01	3	Fiber	570	T-Polymer2	Polystyrene	PS	PS		PAP	1
76	UV042821HA05	18	Fragment	587	ATR-Polymer2	Irganox MD1024	PA	Phenolic Antioxidant	Polymer Additive(Irganox MD1024) DuraSamplIR-II	is a metal deactivator and primary, sterically hindered phenolic antioxidant for telecommunication wire and cable applications.					221	DR041120HR01	4	Fragment	632	T-Polymer2	Polycarbonate	PC	PC		PC	10
77	UV042821HA31	3	Fragment	587	ATR-Polymer2	Polymethylpentene	PMP	D_Poly_4_Methyl_1_Pentene	Polymer Additive(Irganox 1330) Transmission(Microscope)						276	DR041120HR01	5	Fragment	729	T-Polymer2	Polycarbonate	PC	PC		PLT	1
78	UV042821HA34	10	Fragment	587	ATR-Polymer2	IIR	IIR	D_IIR Rubber	Polymer Additive(Irganox 1330) DuraSamplIR-II						108	DR041120HR01	6	Fiber	591	ATR-Polymer2	Polyethylene Oxide	PPO	D_PolyethyleneOxide		PP	1
79	DR041120HG06	16	Fragment	588	ATR-Polymer2	Polycarbonate	PC	D_PC2	Polymer Additive(Irganox MD1024) DuraSamplIR-II						271	DR041120HR01	7	Fragment	703	T-Polymer2	Polycarbonate	PC	PC		PPO	1
80	DR041120HM01	10	Fiber	588	ATR-Polymer2	Polyester	PET	D_Polyester4	Polymer Additive(Irganox 1330) Transmission(Microscope)						247	DR041120HR01	8	Fiber	656	T-Polymer2	Polycarbonate	PC	T_PC2		PPS	1
81	DR041120HT03	3	Fragment	588	T-Polymer2	Irganox 1330	PA	Phenolic Antioxidant	Irganox MD1024 HINDERED PHENOLIC ANTIOXIDANT-METAL DEACTIVATOR1,2-BIS(3,5-DI-tert-BUTYL-4-HYDROXYHYDROCINNAMOYL)HYDRAZINE; HINDERED PHENOLC34H52O4N2CAS NO. 32687-78-8ATR/diamond ATRcorrected						256	DR041120HR01	9	Fragment	666	T-Polymer2	Polycarbonate	PC	PC		PS	1
82	UV042821HA05	11	Fiber	588	ATR-Polymer2	Polycarbonate	PC	D_PC-PBT	Polymer Additive(Irganox 1330) DuraSamplIR-II						169	DR041120HR01	10	Fragment	603	ATR-Polymer2	Polycarbonate	PC	D_PC			19
83	UV042821HA05	24	Fragment	588	ATR-Polymer2	Epoxy	EPX	Epoxy	Polymer Additive(Irganox 1330) DuraSamplIR-II						198	DR041120HR01	11	Fragment	615	T-Polymer2	Polycarbonate	PC	T_PC2
84	UV042821HA31	14	Fragment	588	ATR-Polymer2	Irganox 1330	PA	Phenolic Antioxidant	Polymer Additive(Irganox MD1024) Transmission(Microscope)						242	DR041120HR01	12	Fragment	647	ATR-Polymer2	Polycarbonatephenylene PC	PC	D_PC
85	DR041120HG02	3	Drop	589	T-Polymer2	Silicon	Si	Silicon Grease	Polymer Additive(Irganox 1076) Transmission(Microscope)						250	DR041120HR01	13	Fragment	658	T-Polymer2	Paper	PAP	Paper
86	DR041120HJ03	1	Fiber	589	IRs Polymer2	Polybutadiene	BR3	BR3	Polyacetylene Transmission(Microscope)						202	DR041120HR01	14	Fragment	618	T-Polymer2	Polycarbonate	PC	PC
87	DR041120HR01	19	Fiber	589	T-Polymer2	Polypropylene	PP	PP	Polyacetylene Transmission(Microscope)						163	DR041120HR01	15	Fragment	602	ATR-Polymer2	Cellulose	PLT	D_Cellulose5 Plant
88	UV042821HA22	6	Fiber	589	ATR-Polymer2	Polyethylene Oxide	PEG	D_PolyethyleneOxide	Polyacetylene Transmission(Microscope)						58	DR041120HR01	16	Fiber	583	ATR-Polymer2	Polyphenlene Sulfide	PPS	D_PPS2
89	UV042821HA22	12	Fiber	589	ATR-Polymer2	Styrene Butadiene	SB	D_SB	Poly(alpha-Methylstyrene) DuraSamplIR-II						26	DR041120HR01	17	Fiber	578	T-Polymer2	Acrylic	ACR	Acrylic Adhesive
90	UV042821HA22	14	Fragment	589	ATR-Polymer2	Butadiene	BR3	High-trans Polybutadiene	Paper Transmission(Microscope)						120	DR041120HR01	18	Fiber	593	IRs Polymer2	Polybutadiene	BR3	BR3
91	UV042821HA52	7	Fragment	589	T-Polymer2	Polycarbonate	PC	PC	Polyarylate(PAR) Transmission(Microscope)						87	DR041120HR01	19	Fiber	589	T-Polymer2	Polypropylene	PP	PP
92	UV042821HA52	9	Fragment	589	IRs Polymer2	Polystyrene	PS	PS	Polyarylate(PAR) Transmission(Microscope)																MP Abbr Type
93	DR042821HA32	15	fiber	590	IRs Polymer2	Polyphenylene Sulfide	PPS	PPS	Poly(1-Butene), Isotactic DuraSamplIR-II	Isotactic poly (1-butene) (PB-1) is a thermoplastic polyolefin with outstanding mechanical properties, like high creep resistance, low stiffness, good impact behavior, and excellent elastic recovery.					277	DR041120HT03	1	Fragment	768	T-Polymer2	Protein	PLT	Soy Bean Powder		BR3	1
94	DR041120HG02	5	Fiber	590	IRs Polymer2	Ramie	PLT	RAMIE Plant Fiber Organic	Polybutylene Terephthalate(PBT) Transmission(Microscope)						203	DR041120HT03	2	Fragment	618	T-Polymer2	Polyphenylene Sulfide	PPS	PPS		NYL	1
95	DR041120HG06	6	Fragment	590	T-Polymer2	Polycarbonate	PC	PC	PolybuteneATR/diamond ATRcorrected						81	DR041120HT03	3	Fragment	588	T-Polymer2	Irganox 1330	PA	Phenolic Antioxidant		PA	2
96	UV042821HA05	3	Fiber	590	IRs Polymer2	DLTDPANTIOXIDANT	DLTDP	DLTDP	Polycarbonate(PC) Transmission(Microscope)						233	DR041120HT03	4	Fragment	641	T-Polymer2	Polyacetylene	PAC	Polyacetylene		PAC	1
97	UV042821HA05	17	Fiber	590	IRs Polymer2	DLTDPANTIOXIDANT	DLTDP	DLTDP	Polycarbonate(PC) DuraSamplIR-II						129	DR041120HT03	5	Fragment	595	ATR-Polymer2	Polyvinylchloried	PVC	D_PVC with TerephthalicEster		PC	3
98	UV042821HA11	7	Fragment	590	IRs Polymer2	Polyphenylene Sulfide	PPS	PPS	Polycarbonate/Polybutylene Terephthalate(PC/PBT) DuraSamplIR-II						249	DR041120HT03	6	Fragment	657	IRs Polymer2	Polycarbonatephenylene ROMATR	PC	PC		PCL	1
99	UV042821HA31	15	Fragment	590	IRs Polymer2	Polycarbonate	PC	PC	Polycarbonate(PC) Transmission(Microscope)						248	DR041120HT03	7	Fragment	656	IRs Polymer2	Nylon	NYL	Nylon		PLT	1
100	UV042821HA34	14	Fragment	590	T-Polymer2	Ethylene Vinyl Acetate	EVA	T_EVA-6	Polycarbonate(PC) Transmission(Microscope)						38	DR041120HT03	8	Fiber	580	ATR-Polymer2	Polycaprolac tone	PCL	D_Polycaprolactone		PPS	1
101	UV042821HA52	2	Fragment	590	IRs Polymer2	Tetrafluoroethylene	FEP	FEP	Polycarbonate/CD-ROMATR/diamond ATRcorrected						230	DR041120HT03	9	Fragment	638	T-Polymer2	Polycarbonate	PC	PC		PVC	1
102	UV042821HA52	5	Fragment	590	IRs Polymer2	Polyimide	PI	PI1	Polycarbonate(PC) Transmission(Microscope)						240	DR041120HT03	10	Fragment	645	ATR-Polymer2	Polycarbonatephenylene PC	PC	D_PC		PVDC	1
103	UV042821HA52	11	Fiber	590	T-Polymer2	Polybutadiene	BR3	High-trans Polybutadiene	Polycarbonate(PC) Transmission(Microscope)						5	DR041120HT03	11	Fiber	569	T-Polymer2	Polybutadiene	BR3	High-trans Polybutadiene			13
104	DR041120HJ03	2	Fiber	591	ATR-Polymer2	Styrene Maleic Anhydride	SMA	D_Styrene_Maleic_Anhydride	Polycarbonate(PC) Transmission(Microscope)						31	DR041120HT03	12	Fiber	579	IRs Polymer2	Irganox 1010	PA	Phenolic Antioxidant
105	DR041120HJ03	5	Fragment	591	IRs Polymer2	Polyetherimide	PEI	PEI	Polycarbonate(PC) DuraSamplIR-II						130	DR041120HT03	13	Fragment	595	IRs Polymer2	PVDC	PVDC	PVDC
106	DR041120HJ28	4	Fiber	591	IRs Polymer2	Tetrakis(2,4-di-tert-butylphenyl) (1,1-biphenyl)-4,4'-diylbisphosphonite	PEPQ	P-EPQ	Polycarbonate/Polybutylene Terephthalate(PC/PBT) DuraSamplIR-II																MP Abbr Type
107	DR041120HM01	4	Fragment	591	ATR-Polymer2	Irganox MD 1024	PA	Phenolic Antioxidant	Polycarbonate(PC) DuraSamplIR-II						15	DR042821HA32	1	fiber	575	IRs Polymer2	Polystyrene	PS	PS		EPX	2
108	DR041120HR01	6	Fiber	591	ATR-Polymer2	Polyethylene Oxide	PPO	D_PolyethyleneOxide	Polycarbonate(PC) DuraSamplIR-II						43	DR042821HA32	2	fragment	581	ATR-Polymer2	Polyalpha Methylstyrene	PAM	D_Poly_alpha_Methylstyrene		HRB	1
109	UV042821HA34	9	Fragment	591	T-Polymer2	Epoxy	EPX	Epoxy	Polycarbonate(PC) DuraSamplIR-II						3	DR042821HA32	3	fiber	569	IRs Polymer2	Polyimide	PI	PI2 (PI)		PAM	1
110	UV042821HA46	5	Fragment	591	ATR-Polymer2	Polyphenylene Oxide	PPO	D_PPO-PA	Polycarbonate(PC) Transmission(Microscope)						64	DR042821HA32	4	fiber	585	T-Polymer2	Epoxy	EPX	Epoxy		PBT	1
111	UV042821HA46	17	Fragment	591	T-Polymer2	Epoxy	EPX	Epoxy	Polycarbonate/Polybutylene Terephthalate(PC/PBT) DuraSamplIR-II						224	DR042821HA32	5	fragment	635	T-Polymer2	Phenoxy	HRB	Herbicide		PC	5
112	UV042821HA48	5	Fragment	591	ATR-Polymer2	Polyvinylchloride	PVC	D_PVC_Carboxylated	Polycarbonate(PC) Transmission(Microscope)						220	DR042821HA32	6	fragment	632	ATR-Polymer2	Polycarbonate	PC	D_PC		PI	2
113	DR041120HE02	12	Fragment	592	IRs Polymer2	Polyetherimide	PEI	PEI	Polycarbonate(PC) DuraSamplIR-II						212	DR042821HA32	7	fragment	625	T-Polymer2	Polycarbonate	PC	PC		PLT	1
114	DR041120HG06	19	Fragment	592	T-Polymer2	Polycarbonate	PC	PC	Polycarbonate(PC) DuraSamplIR-II						119	DR042821HA32	8	fiber	593	ATR-Polymer2	Polyimide	PI	D_PI1		PPS	1
115	UV042821HA05	12	Fiber	592	T-Polymer2	Polyimide	PI	PI	Polycarbonate(PC) Transmission(Microscope)						148	DR042821HA32	9	fragment	599	IRs Polymer2	Ramie	PLT	RAMIE Plant Fiber Organic		PS	1
116	UV042821HA12	4	Fragment	592	ATR-Polymer2	Polyvinylindene Flouride	PVDF	D_PVDF	Polycarbonate(PC) Transmission(Microscope)						269	DR042821HA32	10	fragment	698	ATR-Polymer2	Polycarbonatephenylene PC	PC	D_PC			15
117	UV042821HA12	11	Fragment	592	ATR-Polymer2	Polyimide	PI	D_PI1	Polycarbonate(PC) DuraSamplIR-II						167	DR042821HA32	11	fragment	603	ATR-Polymer2	Polycarbonate	PC	D_PC-PBT
118	UV042821HA34	8	Fiber	592	IRs Polymer2	POLYETHYLENE	PEG	PETG-20	Polycarbonate(PC) DuraSamplIR-II						213	DR042821HA32	12	fragment	626	ATR-Polymer2	Epoxy	EPX	Epoxy
119	DR042821HA32	8	fiber	593	ATR-Polymer2	Polyimide	PI	D_PI1	Polycarbonate/CD-ROMATR/diamond ATRcorrected						142	DR042821HA32	13	fiber	598	IRs Polymer2	Polybutene ATR	PBT	PB
120	DR041120HR01	18	Fiber	593	IRs Polymer2	Polybutadiene	BR3	BR3	Polycarbonate(PC) Transmission(Microscope)						193	DR042821HA32	14	fragment	613	T-Polymer2	Polycarbonate	PC	PC
121	UV042821HA04	1	Fragment	593	T-Polymer2	Epoxy	EPX	Epoxy	Polycarbonate(PC) Transmission(Microscope)						93	DR042821HA32	15	fiber	590	IRs Polymer2	Polyphenylene Sulfide	PPS	PPS
122	UV042821HA46	14	Fragment	593	ATR-Polymer2	Aramid	ARA	D_Aramid	Polycarbonate(PC) Transmission(Microscope)																MP Abbr Type
123	UV042821HA48	8	Fragment	593	T-Polymer2	Polycarbonate	PC	PC	Polycarbonate(PC) DuraSamplIR-II						121	UV042821HA04	1	Fragment	593	T-Polymer2	Epoxy	EPX	Epoxy		BR3	1
124	UV042821HA52	13	Fragment	593	IRs Polymer2	DLTDPANTIOXIDANT	DLTDP	DLTDP	Polycarbonate(PC) Transmission(Microscope)						280	UV042821HA04	2	Duplicate							EPX	1
125	DR041120HM01	7	Fiber	594	T-Polymer2	Polybutadiene	BR3	T_1_2_Polybutadiene	Polycarbonate(PC) Transmission(Microscope)						27	UV042821HA04	3	Fiber	578	ATR-Polymer2	Poly(Tetrafluoroethylene)	PTFE2	D_PTFE2		FEP	1
126	UV042821HA52	8	Fragment	594	T-Polymer2	Polycarbonate	PC	T_PC2	Polycarbonate(PC) DuraSamplIR-II						179	UV042821HA04	4	Fragment	606	ATR-Polymer2	Polybutene ATR	PIB	D_Polybutene		MEL	1
127	UV042821HA52	18	Fragment	594	T-Polymer2	Epoxy	EPX	Epoxy	Polycarbonate(PC) Transmission(Microscope)						13	UV042821HA04	5	Fragment	573	ATR-Polymer2	Irganox 1010	PA	Phenolic Antioxidant		PA	1
128	DR041120HM01	5	Fragment	595	IRs Polymer2	Chimassorb 944LD	HLAS	Chimassorb 944LD	Polycarbonate(PC) Transmission(Microscope)						254	UV042821HA04	6	Fragment	664	T-Polymer2	Polycarbonate	PC	PC		PC	11
129	DR041120HT03	5	Fragment	595	ATR-Polymer2	Polyvinylchloried	PVC	D_PVC with TerephthalicEster	Polycarbonate(PC) DuraSamplIR-II						270	UV042821HA04	7	Fragment	702	ATR-Polymer2	Polycarbonatephenylene PC	PC	D_PC		PEG	1
130	DR041120HT03	13	Fragment	595	IRs Polymer2	PVDC	PVDC	PVDC	Polycarbonate(PC) Transmission(Microscope)						255	UV042821HA04	8	Fragment	664	IRs Polymer2	Polycarbonatephenylene ROMATR	PC	PC		PIB	1
131	UV042821HA12	8	Fragment	595	T-Polymer2	Irganox 1330	PA	Phenolic Antioxidant	Polycarbonate(PC) Transmission(Microscope)						252	UV042821HA04	9	Fragment	660	T-Polymer2	Polycarbonate	PC	PC		PLT	1
132	UV042821HA31	11	Fragment	595	IRs Polymer2	Irganox MD1024	PA	Phenolic Antioxidant	Polycarbonate(PC) Transmission(Microscope)						205	UV042821HA04	10	Fragment	619	IRs Polymer2	Melamin	MEL	MELAMIN		PTFE2	1
133	UV042821HA46	12	Fragment	595	T-Polymer2	Epoxy	EPX	Epoxy	Polycarbonate(PC) Transmission(Microscope)						235	UV042821HA04	11	Fragment	642	T-Polymer2	Polycarbonate	PC	PC			20
134	UV042821HA48	1	Fragment	595	T-Polymer2	Epoxy	EPX	Epoxy	Polycarbonate(PC) Transmission(Microscope)						227	UV042821HA04	12	Fragment	637	T-Polymer2	Polycarbonate	PC	PC
135	DR041120HE02	2	Fragment	596	IRs Polymer2	POLYETHYLENE	PEG	PETG-20	Polycarbonate(PC) DuraSamplIR-II						218	UV042821HA04	13	Fragment	629	T-Polymer2	Polycarbonate	PC	PC
136	DR041120HG06	10	Fiber	596	ATR-Polymer2	Polyethersulfone	PES	D_PES	Polycarbonate(PC) Transmission(Microscope)						234	UV042821HA04	14	Fragment	641	ATR-Polymer2	Polycarbonatephenylene PC	PC	D_PC
137	UV042821HA05	23	Can't see	596	ATR-Polymer2	D_Poly_alpha_Methylstyrene	AMS	D_Poly_alpha_Methylstyrene	Polycarbonate(PC) Transmission(Microscope)						245	UV042821HA04	15	Fragment	652	T-Polymer2	Ramie	PLT	RAMIE Plant Fiber Organic
138	UV042821HA52	6	Fragment	596	ATR-Polymer2	Polymethylpentene	PMP	D_Poly_4_Methyl_1_Pentene	Polycarbonate(PC) DuraSamplIR-II						62	UV042821HA04	16	Fiber	584	ATR-Polymer2	Polyethylene glycol	PEG	D_Polyethyleneglycol
139	UV042821HA52	12	Fragment	596	T-Polymer2	Polybutadiene	BR3	T_1_2_Polybutadiene	Polycarbonate(PC) DuraSamplIR-II						260	UV042821HA04	17	Fragment	677	ATR-Polymer2	Polycarbonatephenylene PC	PC	D_PC
140	UV042821HA31	13	Fragment	597	IRs Polymer2	DLTDPANTIOXIDANT	DLTDP	DLTDP	Polycarbonate(PC) DuraSamplIR-II						246	UV042821HA04	18	Fragment	654	T-Polymer2	Polycarbonate	PC	PC
141	UV042821HA34	4	Fragment	597	ATR-Polymer2	Polyoxymethylene	POM	Polyacetal	Polycarbonate(PC) DuraSamplIR-II						228	UV042821HA04	19	Fragment	637	T-Polymer2	Polycarbonate	PC	PC
142	DR042821HA32	13	fiber	598	IRs Polymer2	Polybutene ATR	PBT	PB	Polycarbonate(PC) Transmission(Microscope)						223	UV042821HA04	20	Fragment	634	T-Polymer2	Tetrafluoroethylene	FEP	FEP
143	DR041120HG02	1	Fragment	598	ATR-Polymer2	Polycarbonate	PC	D_PC2	Polycarbonate(PC) DuraSamplIR-II						44	UV042821HA04	21	Fiber	581	ATR-Polymer2	Polybutadiene	BR3	D_1_2_Polybutadiene Synthetic Rubber
144	UV042821HA05	13	Fiber	598	ATR-Polymer2	Irganox 1330	PA	Phenolic Antioxidant	Polycarbonate(PC) Transmission(Microscope)																MP Abbr Type
145	UV042821HA12	2	Fragment	598	T-Polymer2	Polyphenylene Sulfide	PPS	PPS	Polycarbonate(PC) Transmission(Microscope)						187	UV042821HA05	1	Fiber	607	ATR-Polymer2	Polyphenylene Sulfide	PPS	D_PPS		AMS	1
146	UV042821HA31	17	Fragment	598	T-Polymer2	Polybutadiene	BR3	T_1_2_Polybutadiene	Polycarbonate(PC) Transmission(Microscope)						32	UV042821HA05	2	Unknown	579	T-Polymer2	Polyphenylene	PPP	PPS		DLTDP	2
147	UV042821HA46	11	Fragment	598	ATR-Polymer2	Polybutadiene	BR3	High cis Polybutadiene	Polycarbonate(PC) Transmission(Microscope)						96	UV042821HA05	3	Fiber	590	IRs Polymer2	DLTDPANTIOXIDANT	DLTDP	DLTDP		EPX	2
148	DR042821HA32	9	fragment	599	IRs Polymer2	Ramie	PLT	RAMIE Plant Fiber Organic	Polycarbonate/CD-ROMATR/diamond ATRcorrected						17	UV042821HA05	4	Fiber	575	ATR-Polymer2	Polyethylene glycol	PEG	D_Polyethyleneglycol		LDPE	1
149	DR041120HJ28	5	Fiber	599	T-Polymer2	Polyester	PET	Polyester	Polycarbonate(PC) Transmission(Microscope)						23	UV042821HA05	5	Fiber	577	IRs Polymer2	Butyl Rubber	RUBB	BUTYL_RB		LS770	1
150	UV042821HA12	12	Fragment	599	T-Polymer2	Epoxy	EPX	Epoxy	Polycarbonate(PC) Transmission(Microscope)						39	UV042821HA05	6	Fiber	580	T-Polymer2	Epoxy	EPX	Epoxy		PA	2
151	UV042821HA12	17	Fiber	599	IRs Polymer2	Polyphenylene Sulfide	PPS	PPS	Polycarbonate(PC) Transmission(Microscope)						40	UV042821HA05	7	Fiber	580	T-Polymer2	Polydiallyl Isophthalate	PDI	T_Polydiallyl_Isophthalate		PC	3
152	UV042821HA22	4	Fragment	599	T-Polymer2	Polyethylene	HDPE	T_HDPE	Polycarbonate/CD-ROMATR/diamond ATRcorrected						70	UV042821HA05	8	Fiber	586	IRs Polymer2	Low	LDPE	LLDPE1		PDI	1
153	UV042821HA48	12	Fragment	599	T-Polymer2	Epoxy	EPX	Epoxy	Polycarbonate(PC) Transmission(Microscope)						190	UV042821HA05	9	Fragment	609	IRs Polymer2	Tetrakis(2,4-di-tert-butylphenyl) (1,1-biphenyl)-4,4'-diylbisphosphonite	PEPQ	P-EPQ		PEG	1
154	DR041120HG02	7	Fragment	600	IRs Polymer2	POLYETHYLENE	PEG	PETG-20	Polycarbonate(PC) Transmission(Microscope)						281	UV042821HA05	10	Duplicate							PEI	1
155	UV042821HA12	10	Fragment	600	ATR-Polymer2	Sanol LS770	LS770	D_Additive6	Polycarbonate(PC) Transmission(Microscope)						82	UV042821HA05	11	Fiber	588	ATR-Polymer2	Polycarbonate	PC	D_PC-PBT		PEPQ	1
156	UV042821HA12	13	Fragment	600	ATR-Polymer2	Polyethylene glycol	PEG	D_Polyethyleneglycol	Polycarbonate(PC) Transmission(Microscope)						115	UV042821HA05	12	Fiber	592	T-Polymer2	Polyimide	PI	PI		PHSI	1
157	UV042821HA31	16	Fragment	600	T-Polymer2	Epoxy	EPX	Epoxy	Polycarbonate(PC) DuraSamplIR-II						144	UV042821HA05	13	Fiber	598	ATR-Polymer2	Irganox 1330	PA	Phenolic Antioxidant		PI	1
158	UV042821HA34	1	Unknown	600	ATR-Polymer2	Irganox 1330	PA	Phenolic Antioxidant	Polycarbonate(PC) DuraSamplIR-II						33	UV042821HA05	14	Fiber	579	ATR-Polymer2	Sanol LS770	LS770	Polymer Additive		PPP	1
159	UV042821HA46	9	Fragment	600	IRs Polymer2	Polystyrene	PS	PS1	Polycarbonate(PC) DuraSamplIR-II						55	UV042821HA05	15	Fiber	582	ATR-Polymer2	Polyphenylene sulfide	PPS	D_PPS		PPS	2
160	DR041120HG02	2	Fragment	601	IRs Polymer2	PEEK Film	PEEK	PEEK	Polycarbonate(PC) DuraSamplIR-II						18	UV042821HA05	16	Fiber	575	IRs Polymer2	Polystyrene	PS	PS		PS	1
161	DR041120HG06	17	Fragment	601	T-Polymer2	Phenoxy	HRB	Herbicide	Polycarbonate(PC) DuraSamplIR-II						97	UV042821HA05	17	Fiber	590	IRs Polymer2	DLTDPANTIOXIDANT	DLTDP	DLTDP		RUBB	1
162	UV042821HA31	9	Fragment	601	ATR-Polymer2	Polimide	PI	D_PI2	Polycarbonate(PC) Transmission(Microscope)						76	UV042821HA05	18	Fragment	587	ATR-Polymer2	Irganox MD1024	PA	Phenolic Antioxidant			23
163	DR041120HR01	15	Fragment	602	ATR-Polymer2	Cellulose	PLT	D_Cellulose5 Plant	Polycarbonate(PC) DuraSamplIR-II						257	UV042821HA05	19	Fragment	667	T-Polymer2	Polycarbonate	PC	PC
164	UV042821HA11	8	Fragment	602	T-Polymer2	Epoxy	EPX	Epoxy	Polycarbonate(PC) DuraSamplIR-II						175	UV042821HA05	20	Fiber	605	ATR-Polymer2	Polyetherimide	PEI	D_PEI
165	UV042821HA31	19	Fragment	602	T-Polymer2	Phenoxy	HRB	Herbicide	Polycarbonate(PC) Transmission(Microscope)						56	UV042821HA05	21	Fragment	582	IRs Polymer2	Phenylsilicone	PHSI	PHSI
166	UV042821HA46	10	Fragment	602	ATR-Polymer2	Polyimide	PI	D_PI1	Polycarbonate(PC) DuraSamplIR-II						274	UV042821HA05	22	Fragment	718	ATR-Polymer2	Polycarbonatephenylene PC	PC	D_PC
167	DR042821HA32	11	fragment	603	ATR-Polymer2	Polycarbonate	PC	D_PC-PBT	Polycarbonate(PC) Transmission(Microscope)						137	UV042821HA05	23	Can't see	596	ATR-Polymer2	D_Poly_alpha_Methylstyrene	AMS	D_Poly_alpha_Methylstyrene
168	DR041120HG06	15	Fragment	603	ATR-Polymer2	Polycarbonate	PC	D_PC	Polycarbonate(PC) DuraSamplIR-II						83	UV042821HA05	24	Fragment	588	ATR-Polymer2	Epoxy	EPX	Epoxy
169	DR041120HR01	10	Fragment	603	ATR-Polymer2	Polycarbonate	PC	D_PC	Polycarbonate(PC) Transmission(Microscope)																MP Abbr Type
170	UV042821HA22	1	Fragment	603	T-Polymer2	Epoxy	EPX	Epoxy	Polycarbonate(PC) Transmission(Microscope)						10	UV042821HA11	1	Film	571	IRs Polymer2	Polypropylene	PP	PP		EPX	2
171	UV042821HA22	11	Fiber	603	ATR-Polymer2	Polybutadiene	BR3	High trans Polybutadiene	Polycaprolactone DuraSamplIR-II	Polycaprolactone (PCL) is a synthetic, semi-crystalline, biodegradable polyester with a melting point of about 60 °C and a glass transition temperature of about −60 °C					71	UV042821HA11	2	Fragment	586	ATR-Polymer2	Irganox 1076	PA	Phenolic Antioxidant		PA	1
172	UV042821HA48	11	Fragment	603	T-Polymer2	Polyarylate	PAR	PAR	Poly(Diallyl Isophthalate) Transmission(Microscope)						222	UV042821HA11	3	Fragment	632	ATR-Polymer2	Polyphenylene Sulfide	PPS	D_PPS2		PIP	1
173	UV042821HA46	6	Fragment	604	T-Polymer2	Irganox MD1024	PA	Phenolic Antioxidant	Polyetheretherketone(PEEK) Transmission(Microscope)						20	UV042821HA11	4	Fiber	576	IRs Polymer2	Polystyrene	PS	PS		PP	1
174	DR041120HG02	8	Fragment	605	IRs Polymer2	Silicone	Si	SILICO2	Polyetheretherketone(PEEK) DuraSamplIR-II						192	UV042821HA11	5	Fragment	612	ATR-Polymer2	Epoxy	EPX	Epoxy		PPS	2
175	UV042821HA05	20	Fiber	605	ATR-Polymer2	Polyetherimide	PEI	D_PEI	PEEKFilm						45	UV042821HA11	6	Fragment	581	IRs Polymer2	Polyisoprene	PIP	PIP		PS	1
176	UV042821HA31	4	Fragment	605	T-Polymer2	Polyphenylene Sulfide	PPS	PPS	Polyethylene Glycol 20000 DuraSamplIR-II						98	UV042821HA11	7	Fragment	590	IRs Polymer2	Polyphenylene Sulfide	PPS	PPS			8
177	UV042821HA48	4	Fragment	605	ATR-Polymer2	Polycarbonate	PC	D_PC	Polyethylene Glycol 20000 DuraSamplIR-II						164	UV042821HA11	8	Fragment	602	T-Polymer2	Epoxy	EPX	Epoxy
178	DR041120HE02	3	Fragment	606	ATR-Polymer2	Polybutadiene	BR3	D_1_2_Polybutadiene	Polyethylene Glycol 20000 DuraSamplIR-II																MP Abbr Type
179	UV042821HA04	4	Fragment	606	ATR-Polymer2	Polybutene ATR	PIB	D_Polybutene	Polyethylene Glycol 20000 Transmission(Microscope)						34	UV042821HA12	1	Fiber	579	T-Polymer2	Polyvinylchloride	PVC	T_PVC with PhenoricSulfonicEster		EPX	2
180	UV042821HA22	5	Fiber	606	IRs Polymer2	Polyphenylene Sulfide	PPS	PPS	Poly(Ethylene Oxide) DuraSamplIR-II						145	UV042821HA12	2	Fragment	598	T-Polymer2	Polyphenylene Sulfide	PPS	PPS		HLAS	1
181	UV042821HA22	10	Fragment	606	T-Polymer2	Irganox 1076	PA	Phenolic Antioxidant	POLYETHYLENE GLYCOLORIGIN Date: 92/04/09 File: PETG-20.DXINFRARED SPECTROPHOTOMETER FTIR-8000 SERIES						46	UV042821HA12	3	Fragment	581	T-Polymer2	Epoxy	EPX	Epoxy		LS770	1
182	UV042821HA31	18	Fragment	606	ATR-Polymer2	D_Polyisoprene_Chlorinated	RUBB	D_Polyisoprene_Chlorinated	POLYETHYLENE GLYCOLORIGIN Date: 92/04/09 File: PETG-20.DXINFRARED SPECTROPHOTOMETER FTIR-8000 SERIES						116	UV042821HA12	4	Fragment	592	ATR-Polymer2	Polyvinylindene Flouride	PVDF	D_PVDF		PA	1
183	UV042821HA34	12	Fragment	606	ATR-Polymer2	trans-Polyisoprene Rubber	RUBB	D_IR-trans	POLYETHYLENE GLYCOLORIGIN Date: 92/04/09 File: PETG-20.DXINFRARED SPECTROPHOTOMETER FTIR-8000 SERIES						194	UV042821HA12	5	Fragment	613	ATR-Polymer2	Chimassorb 944LD	HLAS	Chimassorb 944LD		PAR	1
184	UV042821HA46	8	Fragment	606	IRs Polymer2	Polyethylene glycol	PEG	PETG	Polyethylene Glycol 20000 DuraSamplIR-II						47	UV042821HA12	6	Fragment	581	T-Polymer2	Polyarylate	PAR	PAR		PC	3
185	DR041120HG06	9	Fragment	607	T-Polymer2	Polyacetylene	PAC	Polyacetylene	Polyethylene glycolORIGIN Date: 92/03/27 File: PETG.DXINFRARED SPECTROPHOTOMETER FTIR-8000 SERIES						188	UV042821HA12	7	Fragment	608	ATR-Polymer2	Polyvinylchloride	PVC	D_PVC with PhthalicEster 1		PEG	1
186	DR041120HM01	6	Fragment	607	ATR-Polymer2	Polysulfone	PSO	D_Polysulfone	PolyetherimideFilm						131	UV042821HA12	8	Fragment	595	T-Polymer2	Irganox 1330	PA	Phenolic Antioxidant		PI	1
187	UV042821HA05	1	Fiber	607	ATR-Polymer2	Polyphenylene Sulfide	PPS	D_PPS	Poly etherimideFilm						262	UV042821HA12	9	Fragment	682	ATR-Polymer2	Polycarbonatephenylene PC	PC	D_PC		PPS	2
188	UV042821HA12	7	Fragment	608	ATR-Polymer2	Polyvinylchloride	PVC	D_PVC with PhthalicEster 1	Polyetherimide(PEI) DuraSamplIR-II						155	UV042821HA12	10	Fragment	600	ATR-Polymer2	Sanol LS770	LS770	D_Additive6		PVC	2
189	UV042821HA34	6	Fragment	608	IRs Polymer2	SBS Film	SBS	SBS	P-EPQANTIOXIDANT PHOSPHONITE COMPOUNDC68H92O4P2CAS NO. ATR/diamond ATRcorrected						117	UV042821HA12	11	Fragment	592	ATR-Polymer2	Polyimide	PI	D_PI1		PVDF	2
190	UV042821HA05	9	Fragment	609	IRs Polymer2	Tetrakis(2,4-di-tert-butylphenyl) (1,1-biphenyl)-4,4'-diylbisphosphonite	PEPQ	P-EPQ	P-EPQANTIOXIDANT PHOSPHONITE COMPOUNDC68H92O4P2CAS NO. ATR/diamond ATRcorrected						150	UV042821HA12	12	Fragment	599	T-Polymer2	Epoxy	EPX	Epoxy			17
191	DR041120HG06	21	Fragment	611	T-Polymer2	Polybutadiene	BR3	T_1_2_Polybutadiene	P-EPQANTIOXIDANT PHOSPHONITE COMPOUNDC68H92O4P2CAS NO. ATR/diamond ATRcorrected						156	UV042821HA12	13	Fragment	600	ATR-Polymer2	Polyethylene glycol	PEG	D_Polyethyleneglycol
192	UV042821HA11	5	Fragment	612	ATR-Polymer2	Epoxy	EPX	Epoxy	Polyethersulfone(PES) DuraSamplIR-II						59	UV042821HA12	14	Fragment	583	T-Polymer2	Polyvinylindene Flouride	PVDF	PVDF
193	DR042821HA32	14	fragment	613	T-Polymer2	Polycarbonate	PC	PC	PESFilm						226	UV042821HA12	15	Fragment	636	ATR-Polymer2	Polycarbonatephenylene PC	PC	D_PC
194	UV042821HA12	5	Fragment	613	ATR-Polymer2	Chimassorb 944LD	HLAS	Chimassorb 944LD	Polyethersulfone(PES) DuraSamplIR-II						258	UV042821HA12	16	Fragment	669	T-Polymer2	Polycarbonate	PC	PC
195	UV042821HA34	2	Fragment	613	ATR-Polymer2	Epoxy	EPX	Epoxy	Polyester Film(TOYOBO ESTER FILM & ESPET FILM) Transmission(Microscope)						151	UV042821HA12	17	Fiber	599	IRs Polymer2	Polyphenylene Sulfide	PPS	PPS
196	UV042821HA22	2	Fragment	614	ATR-Polymer2	Polycarbonate	PC	D_PC-PBT	Polyester Film(TAIKO-FE) DuraSamplIR-II																MP Abbr Type
197	DR041120HM01	8	Fragment	615	ATR-Polymer2	Polyphenylene Sulfide	PPS	D_PPS2	Polyester Film(TOYOBO ESTER FILM & ESPET FILM) DuraSamplIR-II						170	UV042821HA22	1	Fragment	603	T-Polymer2	Epoxy	EPX	Epoxy		BR3	2
198	DR041120HR01	11	Fragment	615	T-Polymer2	Polycarbonate	PC	T_PC2	Polyester Film(TOYOBO ESTER FILM & ESPET FILM) Transmission(Microscope)						196	UV042821HA22	2	Fragment	614	ATR-Polymer2	Polycarbonate	PC	D_PC-PBT		EPX	1
199	UV042821HA46	13	Fragment	616	ATR-Polymer2	Polycarbonate	PC	D_PC	Polyethylene glycolORIGIN Date: 92/03/27 File: PETG.DXINFRARED SPECTROPHOTOMETER FTIR-8000 SERIES						264	UV042821HA22	3	Fragment	690	ATR-Polymer2	Polycarbonatephenylene PC	PC	D_PC		HDPE	1
200	UV042821HA48	7	Fragment	617	T-Polymer2	Polyvinylchloride	PVC	T_PVC with PhenoricSulfonicEster	Phenylsilicone rubberATR/diamond ATRcorrected						152	UV042821HA22	4	Fragment	599	T-Polymer2	Polyethylene	HDPE	T_HDPE		PA	1
201	UV042821HA48	13	Fragment	617	ATR-Polymer2	Polycarbonate	PC	D_PC	PolyimideFilm						180	UV042821HA22	5	Fiber	606	IRs Polymer2	Polyphenylene Sulfide	PPS	PPS		PC	4
202	DR041120HR01	14	Fragment	618	T-Polymer2	Polycarbonate	PC	PC	Polyimide(Electronic Parts) DuraSamplIR-II						88	UV042821HA22	6	Fiber	589	ATR-Polymer2	Polyethylene Oxide	PEG	D_PolyethyleneOxide		PEG	1
203	DR041120HT03	2	Fragment	618	T-Polymer2	Polyphenylene Sulfide	PPS	PPS	Polyimide(KAPTON) DuraSamplIR-II						265	UV042821HA22	7	Fragment	692	IRs Polymer2	Lanoline Film	WOIL	LANOLINE Wool Oil		PI	1
204	DR041120HG02	10	Fragment	619	T-Polymer2	Polycarbonate	PC	T_PC2	Polyimide DuraSamplIR-II						211	UV042821HA22	8	Fragment	624	T-Polymer2	Polycarbonate	PC	PC		PPS	1
205	UV042821HA04	10	Fragment	619	IRs Polymer2	Melamin	MEL	MELAMIN	Polyimide(Electronic Parts) DuraSamplIR-II						206	UV042821HA22	9	Fragment	619	ATR-Polymer2	Polycarbonate	PC	D_PC		SB	1
206	UV042821HA22	9	Fragment	619	ATR-Polymer2	Polycarbonate	PC	D_PC	Polyimide KAPTONFilm						181	UV042821HA22	10	Fragment	606	T-Polymer2	Irganox 1076	PA	Phenolic Antioxidant		WOIL	1
207	UV042821HA52	14	Fragment	619	ATR-Polymer2	Polycarbonate	PC	D_PC	Polyimide(Electronic Parts) Transmission(Microscope)						171	UV042821HA22	11	Fiber	603	ATR-Polymer2	Polybutadiene	BR3	High trans Polybutadiene			14
208	DR041120HE02	4	Fragment	621	T-Polymer2	Silicon	Si	Silicon Grease	Polyimide(UPILEX) DuraSamplIR-II						89	UV042821HA22	12	Fiber	589	ATR-Polymer2	Styrene Butadiene	SB	D_SB
209	DR041120HR01	2	Fragment	621	IRs Polymer2	Polycarbonate	PC	PC	Polyimide(UPILEX) DuraSamplIR-II						8	UV042821HA22	13	Fiber	570	ATR-Polymer2	Polyimide	PI	D_PI3
210	UV042821HA52	10	Fragment	622	T-Polymer2	Polycarbonate	PC	PC	Polyimide(KAPTON) DuraSamplIR-II						90	UV042821HA22	14	Fragment	589	ATR-Polymer2	Butadiene	BR3	High-trans Polybutadiene
211	UV042821HA22	8	Fragment	624	T-Polymer2	Polycarbonate	PC	PC	Polyimide(UPILEX) DuraSamplIR-II																MP Abbr Type
212	DR042821HA32	7	fragment	625	T-Polymer2	Polycarbonate	PC	PC	Polybutene DuraSamplIR-II	Polybutene is an organic polymer made from a mixture of 1-butene, 2-butene, and isobutylene. Ethylene steam cracker C4s are also used as supplemental feed for polybutene. It is similar to polyisobutylene (PIB), which is produced from essentially pure isobutylene made in a C4 complex of a major refinery.					28	UV042821HA31	1	Fiber	578	ATR-Polymer2	Polyimide	PI	D_PI2		BR3	1
213	DR042821HA32	12	fragment	626	ATR-Polymer2	Epoxy	EPX	Epoxy	Polyisoprene [-CH2CH(CH3)=CHCH2-]nFilm						231	UV042821HA31	2	Fragment	640	T-Polymer2	Polycarbonate	PC	PC		DLTDP	1
214	DR041120HM01	3	Fragment	626	ATR-Polymer2	Polyvinylchloride	PVC	D_PVC with PhenoricSulfonicEster	Polyamide(Nylon12) DuraSamplIR-II						77	UV042821HA31	3	Fragment	587	ATR-Polymer2	Polymethylpentene	PMP	D_Poly_4_Methyl_1_Pentene		EPX	2
215	DR041120HM01	1	Fragment	628	ATR-Polymer2	Polycarbonate	PC	D_PC	Ramie FiberATR/diamond ATRcorrected						176	UV042821HA31	4	Fragment	605	T-Polymer2	Polyphenylene Sulfide	PPS	PPS		HRB	1
216	UV042821HA31	7	Fragment	628	ATR-Polymer2	Epoxy	EPX	Epoxy	Ramie FiberATR/diamond ATRcorrected						57	UV042821HA31	5	Fragment	582	IRs Polymer2	Polypropylene	PP	PP		PA	3
217	UV042821HA48	2	Fragment	628	T-Polymer2	Epoxy	EPX	Epoxy	Ramie DuraSamplIR-II						60	UV042821HA31	6	Fiber	583	ATR-Polymer2	Irganox 1010	PA	Phenolic Antioxidant		PC	3
218	UV042821HA04	13	Fragment	629	T-Polymer2	Polycarbonate	PC	PC	Ramie Transmission(Microscope)						216	UV042821HA31	7	Fragment	628	ATR-Polymer2	Epoxy	EPX	Epoxy		PI	2
219	UV042821HA31	12	Fragment	629	T-Polymer2	Polycarbonate	PC	PC	Protein(Soy Bean Powder) Transmission(Microscope)						21	UV042821HA31	8	Fiber	576	T-Polymer2	Polyphenylene	PPS	PPS		PMP	1
220	DR042821HA32	6	fragment	632	ATR-Polymer2	Polycarbonate	PC	D_PC	Poly(4-Methyl-1 Pentene) DuraSamplIR-II	Polymethylpentene (PMP), also known as poly(4-methyl-1-pentene), is a thermoplastic polyolefin. It is used for gas-permeable packaging, autoclavable medical and laboratory equipment, microwave components, and cookware.					162	UV042821HA31	9	Fragment	601	ATR-Polymer2	Polimide	PI	D_PI2		PP	1
221	DR041120HR01	4	Fragment	632	T-Polymer2	Polycarbonate	PC	PC	Poly(4-Methyl-1 Pentene) DuraSamplIR-II						29	UV042821HA31	10	Fragment	578	T-Polymer2	Polyisoprene Rubber	RUBB	IR-trans		PPS	2
222	UV042821HA11	3	Fragment	632	ATR-Polymer2	Polyphenylene Sulfide	PPS	D_PPS2	Polyacetal(Electronic Parts-2) DuraSamplIR-II	Polyoxymethylene (POM), also known as acetal,[4] polyacetal, and polyformaldehyde, is an engineering thermoplastic used in precision parts requiring high stiffness, low friction, and excellent dimensional stability.					132	UV042821HA31	11	Fragment	595	IRs Polymer2	Irganox MD1024	PA	Phenolic Antioxidant		RUBB	2
223	UV042821HA04	20	Fragment	634	T-Polymer2	Tetrafluoroethylene	FEP	FEP	Polypropylene Film						219	UV042821HA31	12	Fragment	629	T-Polymer2	Polycarbonate	PC	PC			19
224	DR042821HA32	5	fragment	635	T-Polymer2	Phenoxy	HRB	Herbicide	Polypropylene Film						140	UV042821HA31	13	Fragment	597	IRs Polymer2	DLTDPANTIOXIDANT	DLTDP	DLTDP
225	DR041120HE02	5	Fragment	635	T-Polymer2	Polycarbonate	PC	PC	Polypropylene, Chlorinated(Chlorine content 65%) DuraSamplIR-II						84	UV042821HA31	14	Fragment	588	ATR-Polymer2	Irganox 1330	PA	Phenolic Antioxidant
226	UV042821HA12	15	Fragment	636	ATR-Polymer2	Polycarbonatephenylene PC	PC	D_PC	Polypropylene(PP) Transmission(Microscope)						99	UV042821HA31	15	Fragment	590	IRs Polymer2	Polycarbonate	PC	PC
227	UV042821HA04	12	Fragment	637	T-Polymer2	Polycarbonate	PC	PC	Poly(Ethylene Oxide) DuraSamplIR-II						157	UV042821HA31	16	Fragment	600	T-Polymer2	Epoxy	EPX	Epoxy
228	UV042821HA04	19	Fragment	637	T-Polymer2	Polycarbonate	PC	PC	Polyphenylene Oxide(Polyphenylene Ether)/Polyamide(PPO/PA NORYL) DuraSamplIR-II						146	UV042821HA31	17	Fragment	598	T-Polymer2	Polybutadiene	BR3	T_1_2_Polybutadiene
229	UV042821HA52	4	Fragment	637	ATR-Polymer2	Epoxy	EPX	Epoxy	Polyphenylene Sulfie(PPS) Transmission(Microscope)						182	UV042821HA31	18	Fragment	606	ATR-Polymer2	D_Polyisoprene_Chlorinated	RUBB	D_Polyisoprene_Chlorinated
230	DR041120HT03	9	Fragment	638	T-Polymer2	Polycarbonate	PC	PC	Polyphenylene Sulfie(PPS) Transmission(Microscope)						165	UV042821HA31	19	Fragment	602	T-Polymer2	Phenoxy	HRB	Herbicide
231	UV042821HA31	2	Fragment	640	T-Polymer2	Polycarbonate	PC	PC	Polyphenylene Sulfide(PPS) DuraSamplIR-II																MP Abbr Type
232	UV042821HA52	1	Fragment	640	T-Polymer2	Polycarbonate	PC	PC	Poly(Phenylene Sulfide) DuraSamplIR-II						158	UV042821HA34	1	Unknown	600	ATR-Polymer2	Irganox 1330	PA	Phenolic Antioxidant		EPX	2
233	DR041120HT03	4	Fragment	641	T-Polymer2	Polyacetylene	PAC	Polyacetylene	PPS Film						195	UV042821HA34	2	Fragment	613	ATR-Polymer2	Epoxy	EPX	Epoxy		EVA	1
234	UV042821HA04	14	Fragment	641	ATR-Polymer2	Polycarbonatephenylene PC	PC	D_PC	PPSFilm						1	UV042821HA34	3	Fiber	564	ATR-Polymer2	Sanol LS770	LS770	Polymer Additive		IIR	1
235	UV042821HA04	11	Fragment	642	T-Polymer2	Polycarbonate	PC	PC	Polyphenylene Sulfie(PPS) Transmission(Microscope)						141	UV042821HA34	4	Fragment	597	ATR-Polymer2	Polyoxymethylene	POM	Polyacetal		LS770	1
236	DR041120HE02	9	Fragment	644	T-Polymer2	Polycarbonate	PC	PC	PPSFilm						266	UV042821HA34	5	Fragment	694	ATR-Polymer2	Polycarbonatephenylene PC	PC	D_PC		PA	2
237	DR041120HG06	7	Fragment	644	ATR-Polymer2	Polycarbonatephenylene PC	PC	D_PC	Polyphenylene Sulfie(PPS) Transmission(Microscope)						189	UV042821HA34	6	Fragment	608	IRs Polymer2	SBS Film	SBS	SBS		PC	1
238	DR041120HG06	13	Fragment	644	ATR-Polymer2	Polycarbonatephenylene PC	PC	D_PC	PPS Film						12	UV042821HA34	7	Fiber	572	T-Polymer2	Silicon	Si	Silicon Grease		PEG	1
239	DR041120HJ03	6	Fragment	645	ATR-Polymer2	Polycarbonatephenylene PC	PC	D_PC	Polyphenylene Sulfide (PPS) DuraSamplIR-II						118	UV042821HA34	8	Fiber	592	IRs Polymer2	POLYETHYLENE	PEG	PETG-20		PETG	1
240	DR041120HT03	10	Fragment	645	ATR-Polymer2	Polycarbonatephenylene PC	PC	D_PC	Poly(Phenylene Sulfide) DuraSamplIR-II						109	UV042821HA34	9	Fragment	591	T-Polymer2	Epoxy	EPX	Epoxy		POM	1
241	DR041120HG06	18	Fragment	647	T-Polymer2	Polycarbonate	PC	PC	Polyphenylene Sulfie(PPS) Transmission(Microscope)						78	UV042821HA34	10	Fragment	587	ATR-Polymer2	IIR	IIR	D_IIR Rubber		PSO	1
242	DR041120HR01	12	Fragment	647	ATR-Polymer2	Polycarbonatephenylene PC	PC	D_PC	Poly(Phenylene Sulfide) DuraSamplIR-II						72	UV042821HA34	11	Fragment	586	ATR-Polymer2	Polysulfone	PSO	D_Polysulfone		RUBB	1
243	DR041120HG02	9	Fragment	649	T-Polymer2	Polycarbonate	PC	T_PC2	Polystyrene(PS) Transmission(Microscope)						183	UV042821HA34	12	Fragment	606	ATR-Polymer2	trans-Polyisoprene Rubber	RUBB	D_IR-trans		SBS	1
244	DR041120HM01	11	Fragment	651	T-Polymer2	Polycarbonate	PC	PC	PolystyreneATR/diamond ATRcorrected						48	UV042821HA34	13	Fragment	581	IRs Polymer2	Polyethylene Glycol	PETG	PETG		Si	1
245	UV042821HA04	15	Fragment	652	T-Polymer2	Ramie	PLT	RAMIE Plant Fiber Organic	PolystyreneATR/diamond ATRcorrected						100	UV042821HA34	14	Fragment	590	T-Polymer2	Ethylene Vinyl Acetate	EVA	T_EVA-6			15
246	UV042821HA04	18	Fragment	654	T-Polymer2	Polycarbonate	PC	PC	PolystyreneATR/diamond ATRcorrected						24	UV042821HA34	15	Fiber	577	IRs Polymer2	Irganox 1330	PA	Phenolic Antioxidant
247	DR041120HR01	8	Fiber	656	T-Polymer2	Polycarbonate	PC	T_PC2	PolystyreneATR/diamond ATRcorrected																MP Abbr Type
248	DR041120HT03	7	Fragment	656	IRs Polymer2	Nylon	NYL	Nylon	PolystyreneFilm						63	UV042821HA46	1	Fiber	584	IRs Polymer2	Polyvinylchloride	PVC	PVDC		ARA	1
249	DR041120HT03	6	Fragment	657	IRs Polymer2	Polycarbonatephenylene ROMATR	PC	PC	Polysulfone DuraSamplIR-II	Polysulfones are a family of high performance thermoplastics. These polymers are known for their toughness and stability at high temperatures.					2	UV042821HA46	2	Fiber	566	IRs Polymer2	Polyethersulfone	PES	PES		BR3	1
250	DR041120HR01	13	Fragment	658	T-Polymer2	Paper	PAP	Paper	Polysulfone DuraSamplIR-II						66	UV042821HA46	3	Fragment	585	ATR-Polymer2	polypropylene	PP	D_PP_Chlorinated		EPX	2
251	DR041120HE02	1	Fragment	659	T-Polymer2	Polycarbonate	PC	T_PC2	Poly(Tetrafluoroethylene) DuraSamplIR-II						41	UV042821HA46	4	Fragment	580	IRs Polymer2	P-EPQANTIOXIDANT PHOSPHONITE	PEPQ	P-EPQ		PA	1
252	UV042821HA04	9	Fragment	660	T-Polymer2	Polycarbonate	PC	PC	Polyurethane FormATR/ZnSe ATRcorrected						110	UV042821HA46	5	Fragment	591	ATR-Polymer2	Polyphenylene Oxide	PPO	D_PPO-PA		PC	2
253	DR041120HG06	20	Fragment	663	IRs Polymer2	Low Density Polyethylene	LDPE	LDPE	Polyvinylchloride with Phenolic ester of aliphatic sulfonic acid Transmission(Microscope)						173	UV042821HA46	6	Fragment	604	T-Polymer2	Irganox MD1024	PA	Phenolic Antioxidant		PEG	1
254	UV042821HA04	6	Fragment	664	T-Polymer2	Polycarbonate	PC	PC	PVDC,Poly (vinylidene chloride) /wlap filmATR/diamond ATRcorrected						49	UV042821HA46	7	Fragment	581	ATR-Polymer2	Polyimide	PI	D_PI4		PEPQ	1
255	UV042821HA04	8	Fragment	664	IRs Polymer2	Polycarbonatephenylene ROMATR	PC	PC	Poly(Vinyl Chloride)(PVC), Carboxylated(Carboxyl content 1.8%) DuraSamplIR-II						184	UV042821HA46	8	Fragment	606	IRs Polymer2	Polyethylene glycol	PEG	PETG		PES	1
256	DR041120HR01	9	Fragment	666	T-Polymer2	Polycarbonate	PC	PC	Polyvinylchloride with BIS(2-Ehylhexyl)Terephthalate DuraSampllR						159	UV042821HA46	9	Fragment	600	IRs Polymer2	Polystyrene	PS	PS1		PET	1
257	UV042821HA05	19	Fragment	667	T-Polymer2	Polycarbonate	PC	PC	Polyvinylchloride with Phthalate DuraSampllR						166	UV042821HA46	10	Fragment	602	ATR-Polymer2	Polyimide	PI	D_PI1		PI	2
258	UV042821HA12	16	Fragment	669	T-Polymer2	Polycarbonate	PC	PC	Polyvinylchloride with Phenolic ester of aliphatic sulfonic acid Transmission(Microscope)						147	UV042821HA46	11	Fragment	598	ATR-Polymer2	Polybutadiene	BR3	High cis Polybutadiene		PP	1
259	UV042821HA46	15	Fragment	669	T-Polymer2	Polycarbonate	PC	PC	Polyvinylchloride with Phenolic ester of aliphatic sulfonic acid DuraSampllR						133	UV042821HA46	12	Fragment	595	T-Polymer2	Epoxy	EPX	Epoxy		PPO	1
260	UV042821HA04	17	Fragment	677	ATR-Polymer2	Polycarbonatephenylene PC	PC	D_PC	PVDC,Poly (vinylidene chloride) /wlap filmATR/diamond ATRcorrected						199	UV042821HA46	13	Fragment	616	ATR-Polymer2	Polycarbonate	PC	D_PC		PS	1
261	UV042821HA48	14	Fragment	681	T-Polymer2	Polyacetylene	PAC	Polyacetylene organic polymer	Polyvinylidene Fluoride(PVDF) Transmission(Microscope)						122	UV042821HA46	14	Fragment	593	ATR-Polymer2	Aramid	ARA	D_Aramid		PVC	1
262	UV042821HA12	9	Fragment	682	ATR-Polymer2	Polycarbonatephenylene PC	PC	D_PC	Polyvinylindene Fluoride(PVDF) DuraSamplIR-II						259	UV042821HA46	15	Fragment	669	T-Polymer2	Polycarbonate	PC	PC			17
263	UV042821HA48	6	Fragment	687	IRs Polymer2	Nylon	NYL	Nylon	Polyvinylindene Fluoride(PVDF) DuraSamplIR-II						42	UV042821HA46	16	Fragment	580	ATR-Polymer2	Polyester	PET	D_Polyester2
264	UV042821HA22	3	Fragment	690	ATR-Polymer2	Polycarbonatephenylene PC	PC	D_PC	Butyl rubber with salt(salt:1540,1016,876cm-1)ATR/diamond ATRcorrected	Butyl rubber, sometimes just called "butyl", is a synthetic rubber, a copolymer of isobutylene with isoprene. The abbreviation IIR stands for isobutylene isoprene rubber. Polyisobutylene, also known as "PIB" or polyisobutene, (C4H8)n,					111	UV042821HA46	17	Fragment	591	T-Polymer2	Epoxy	EPX	Epoxy
265	UV042821HA22	7	Fragment	692	IRs Polymer2	Lanoline Film	WOIL	LANOLINE Wool Oil	trans-Polyisoprene Rubber(IR-trans) Transmission(Microscope)	Natural Rubber															MP Abbr Type
266	UV042821HA34	5	Fragment	694	ATR-Polymer2	Polycarbonatephenylene PC	PC	D_PC	cis-Polyisoprene Rubber(IR-cis) DuraSamplIR-II	Natural Rubber					134	UV042821HA48	1	Fragment	595	T-Polymer2	Epoxy	EPX	Epoxy		EPX	3
267	DR041120HE02	7	Fragment	695	ATR-Polymer2	Polycarbonatephenylene PC	PC	D_PC2	Butyl rubber with salt(salt:1540,1016,876cm-1)ATR/diamond ATRcorrected	Butyl rubber, sometimes just called "butyl", is a synthetic rubber, a copolymer of isobutylene with isoprene. The abbreviation IIR stands for isobutylene isoprene rubber. Polyisobutylene, also known as "PIB" or polyisobutene, (C4H8)n, is the homopolymer of isobutylene, or 2-methyl-1-propene, on which butyl rubber is based.					217	UV042821HA48	2	Fragment	628	T-Polymer2	Epoxy	EPX	Epoxy		LDPE	1
268	DR041120HG06	5	Fragment	696	T-Polymer2	Polycarbonate	PC	PC	Polyisoprene, Chlorinated(Chlorine content 65%) DuraSamplIR-II	RUBBER CHLORINATED;POLYISOPRENE, CHLORINATED;chloroisoprene homopolymer;POLYISOPRENE, CHLORINATED ISO 9001：2015 REACH;1,3-Butadiene,2-methyl-,homopolymer,chlorinated;Chloriertes Polyisopren					67	UV042821HA48	3	Fragment	585	IRs Polymer2	Irganox MD1024	PA	Phenolic Antioxidant		NYL	1
269	DR042821HA32	10	fragment	698	ATR-Polymer2	Polycarbonatephenylene PC	PC	D_PC	trans-Polyisoprene Rubber(IR-trans) DuraSamplIR-II						177	UV042821HA48	4	Fragment	605	ATR-Polymer2	Polycarbonate	PC	D_PC		PA	1
270	UV042821HA04	7	Fragment	702	ATR-Polymer2	Polycarbonatephenylene PC	PC	D_PC	Styrene/Butadiene(SB) SBS Block Copolymer(Styrene content 30%) DuraSamplIR-II						112	UV042821HA48	5	Fragment	591	ATR-Polymer2	Polyvinylchloride	PVC	D_PVC_Carboxylated		PAC	1
271	DR041120HR01	7	Fragment	703	T-Polymer2	Polycarbonate	PC	PC	SBS Film						263	UV042821HA48	6	Fragment	687	IRs Polymer2	Nylon	NYL	Nylon		PAR	1
272	DR041120HE02	8	Fragment	708	ATR-Polymer2	Polycarbonatephenylene PC	PC	D_PC	Silicon Grease Transmission(Microscope)						200	UV042821HA48	7	Fragment	617	T-Polymer2	Polyvinylchloride	PVC	T_PVC with PhenoricSulfonicEster		PBT	1
273	UV042821HA52	3	Fragment	710	T-Polymer2	Polycarbonate	PC	PC	Silicon Grease Transmission(Microscope)						123	UV042821HA48	8	Fragment	593	T-Polymer2	Polycarbonate	PC	PC		PC	3
274	UV042821HA05	22	Fragment	718	ATR-Polymer2	Polycarbonatephenylene PC	PC	D_PC	Silicone rubberATR/diamond ATRcorrected						9	UV042821HA48	9	Fiber	570	ATR-Polymer2	Polyetheretherketone	PEEK	D_PEEK		PEEK	1
275	UV042821HA52	17	Fragment	720	T-Polymer2	Polycarbonate	PC	T_PC2	Silicon Grease Transmission(Microscope)						278	UV042821HA48	10	Fragment	787	IRs Polymer2	Low Density Polyethylene Film	LDPE	LDPE		PVC	2
276	DR041120HR01	5	Fragment	729	T-Polymer2	Polycarbonate	PC	PC	Styrene/Maleic Anhydride Copolymer(50/50 Copolymer) DuraSamplIR-II	Styrene maleic anhydride (SMA or SMAnh) is a synthetic polymer that is built-up of styrene and maleic anhydride monomers. In one copolymer, the monomers can be almost perfectly alternating.					172	UV042821HA48	11	Fragment	603	T-Polymer2	Polyarylate	PAR	PAR			15
277	DR041120HT03	1	Fragment	768	T-Polymer2	Protein	PLT	Soy Bean Powder	Styrene-Ethylene-Butylene Transmission(Microscope)	Styrene is an organic compound with the chemical formula C6H5CH=CH2. Its structure consists of a vinyl group as substituent on benzene.					153	UV042821HA48	12	Fragment	599	T-Polymer2	Epoxy	EPX	Epoxy
278	UV042821HA48	10	Fragment	787	IRs Polymer2	Low Density Polyethylene Film	LDPE	LDPE	Lanoline Film						201	UV042821HA48	13	Fragment	617	ATR-Polymer2	Polycarbonate	PC	D_PC
279	DR041120HG06	2	Duplicate												261	UV042821HA48	14	Fragment	681	T-Polymer2	Polyacetylene	PAC	Polyacetylene organic polymer
280	UV042821HA04	2	Duplicate												25	UV042821HA48	15	Fragment	577	T-Polymer2	Polybutylene Terephthalate	PBT	PBT
281	UV042821HA05	10	Duplicate																						MP Abbr Type
															232	UV042821HA52	1	Fragment	640	T-Polymer2	Polycarbonate	PC	PC		BR3	2
															101	UV042821HA52	2	Fragment	590	IRs Polymer2	Tetrafluoroethylene	FEP	FEP		DLTDP	1
															273	UV042821HA52	3	Fragment	710	T-Polymer2	Polycarbonate	PC	PC		EPX	2
															229	UV042821HA52	4	Fragment	637	ATR-Polymer2	Epoxy	EPX	Epoxy		FEP	1
															102	UV042821HA52	5	Fragment	590	IRs Polymer2	Polyimide	PI	PI1		NYL	1
															138	UV042821HA52	6	Fragment	596	ATR-Polymer2	Polymethylpentene	PMP	D_Poly_4_Methyl_1_Pentene		PC	7
															91	UV042821HA52	7	Fragment	589	T-Polymer2	Polycarbonate	PC	PC		PES	1
															126	UV042821HA52	8	Fragment	594	T-Polymer2	Polycarbonate	PC	T_PC2		PI	1
															92	UV042821HA52	9	Fragment	589	IRs Polymer2	Polystyrene	PS	PS		PMP	1
															210	UV042821HA52	10	Fragment	622	T-Polymer2	Polycarbonate	PC	PC		PS	1
															103	UV042821HA52	11	Fiber	590	T-Polymer2	Polybutadiene	BR3	High-trans Polybutadiene			18
															139	UV042821HA52	12	Fragment	596	T-Polymer2	Polybutadiene	BR3	T_1_2_Polybutadiene
															124	UV042821HA52	13	Fragment	593	IRs Polymer2	DLTDPANTIOXIDANT	DLTDP	DLTDP
															207	UV042821HA52	14	Fragment	619	ATR-Polymer2	Polycarbonate	PC	D_PC
															50	UV042821HA52	15	Fiber	581	ATR-Polymer2	Nylon	NYL	Nylon
															14	UV042821HA52	16	Film	574	IRs Polymer2	Polyethersulfone	PES	PES
															275	UV042821HA52	17	Fragment	720	T-Polymer2	Polycarbonate	PC	T_PC2
															127	UV042821HA52	18	Fragment	594	T-Polymer2	Epoxy	EPX	Epoxy
