# Supplementary material
Source: Research Square preprint supplement (doi:10.21203/rs.3.rs-9512208/v1)
Supplement: Supplementary file 3 [file d481432ac719472c1d91a668.xlsx]

## Sheet: Raw Data
Hailstone	ACR	ARA	BMC	BR3	DLTDP	EPX	EVA	FEP	HDPE	HERB	HLAS	HRB	IIR	LDPE	LS770	MEL	NYL	PA	PAC	PAM	PAP	PAR	PB1	PBT	PC	PCL	PDI	PEEK	PEG	PEI	PEPQ	PES	PET	PETG	PHSI	PI	PIB	PIP	PLT	PMP	POM	PP	PPO	PPS	PS	PSO	PTFE2	PUR	PVC
DR041120HD03	0	0	0	0	0	0	0	0	0	0	0	0	0	0	0	0	0	1	0	0	0	0	0	0	8	0	0	0	0	0	0	0	0	0	0	0	0	0	0	0	0	0	0	0	0	0	1	0	0
DR041120HE02	0	0	1	1	0	0	0	0	0	0	0	0	0	0	0	0	0	0	0	0	0	0	0	0	5	0	0	0	2	1	0	0	0	0	0	0	0	0	0	0	0	0	0	0	0	0	0	1	0
DR041120HG02	0	0	0	0	0	0	0	0	0	0	0	0	0	0	0	0	0	0	0	0	0	0	1	0	3	0	0	2	1	0	0	0	0	0	0	0	0	0	1	0	0	0	0	0	0	0	0	0	0
DR041120HG06	0	0	0	1	0	0	0	0	0	0	0	2	0	1	0	0	1	0	1	0	0	0	0	0	7	0	0	0	0	0	0	1	0	0	0	1	0	0	0	0	0	0	0	0	0	0	0	0	0
DR041120HJ03	0	0	0	1	0	0	0	0	0	0	0	0	0	0	1	0	1	0	0	0	0	0	0	0	1	0	0	0	1	1	0	0	0	0	0	0	0	0	0	0	0	0	0	0	0	0	0	0	0
DR041120HJ28	0	0	0	0	0	1	0	0	1	0	0	0	0	0	0	0	0	0	0	0	0	0	0	0	1	0	0	0	0	0	1		1	0	0	0	0	0	0	0	0	0	0	0	0	0	0	0	0
DR041120HM01	0	0	0	1	0	1	0	0	0	0	1	0	0	0	0	0	0	1	0	0	0	0	0	0	3	0	0	0	0	0	0	0	2	0	0	0	0	0	0	0	0	0	0	1	0	1	0	0	0
DR041120HR01	1	0	0	2	0	0	0	0	0	0	0	0	0	0	0	0	0	0	0	0	1	0	0	0	10	0	0	0	0	0	0	0	0	0	0	0	0	0	1	0	0	1	1	0	1	0	0	0	0
DR041120HT03	0	0	0	1	0	0	0	0	0	0	0	0	0	0	0	0	1	2	1	0	0	0	0	0	3	1	0	0	0	0	0	0	0	0	0	0	0	0	1	0	0	0	0	1	0	0	0	0	1
DR042820HA10	0	0	0	0	0	0	0	0	0	0	0	0	0	0	0	0	0	1	0	0	0	0	0	0	4	0	0	0	0	0	0	0	1	0	0	0	0	0	0	0	0	0	0	0	0	0	0	0	0
DR042821HA32	0	0	0	0	0	2	0	0	0	0	0	1	0	0	0	0	0	0	0	1	0	0	0	1	5	0	0	0	0	0	0	0	0	0	0	2	0	0	1	0	0	0	0	1	1	0	0	0	0
UV042821HA04	0	0	0	1	0	1	0	1	0	0	0	0	0	0	0	1	0	1	0	0	0	0	0	0	11	0	0	0	1	0	0	0	0	0	0	0	1	0	1	0	0	0	0	0	0	0	1	0	0
UV042821HA05	0	0	0	0	1	2	0	0	0	0	0	0	0	1	1	0	0	2	0	1	0	0	0	0	3	0	1	0	1	1	1	0	0	0	1	1	0	0	0	0	0	0	0	2	1	0	0	0	0
UV042821HA11	0	0	0	0	0	2	0	0	0	0	0	0	0	0	0	0	0	1	0	0	0	0	0	0	0	0	0	0	0	0	0	0	0	0	0	0	0	1	0	0	0	1	0	2	1	0	0	0	0
UV042821HA12	0	0	0	0	0	2	0	0	0	0	1	0	0	0	1	0	0	1	0	0	0	1	0	0	3	0	0	0	1	0	0	0	0	0	0	1	0	0	0	0	0	0	0	2	0	0	0	0	2
UV042821HA22	0	0	0	2	0	1	0	0	1	0	0	0	0	0	0	0	0	1	0	0	0	0	0	0	4	0	0	0	1	0	0	0	0	0	0	1	0	0	0	0	0	0	0	1	0	0	0	0	0
UV042821HA31	0	0	0	1	1	2	0	0	0	1	0	0	0	0	0	0	0	3	0	0	0	0	0	0	3	0	0	0	0	0	0	0	0	0	0	2	0	0	0	1	0	1	0	2	0	0	0	0	0
UV042821HA34	0	0	0	0	0	2	1	0	0	0	0	0	1	0	1	0	0	2	0	0	0	0	0	0	1	0	0	0	1	0	0	0	0	1	0	0	0	0	0	0	1	0	0	0	0	1	0	0	0
UV042821HA46	0	1	0	1	0	2	0	0	0	0	0	0	0	0	0	0	0	1	0	0	0	0	0	0	2	0	0	0	0	0	1	1	1	1	0	2	0	0	0	0	0	1	1	0	1	0	0	0	1
UV042821HA48	0	0	0	0	0	3	0	0	0	0	0	0	0	1	0	0	1	1	1	0	0	1		1	3	0	0	1	0	0	0	0	0	0	0	0	0	0	0	0	0	0	0	0	0	0	0	0	2
UV042821HA52	0	0	0	2	1	2	0	1	0	0	0	0	0	0	0	0	1	0	0	0	0	0	0	0	7	0	0	0	0	0	0	1	0	0	0	1	0	0	0	1	0	0	0	0	1	0	0	0	0
Count Total	1	1	1	11	3	13	1	2	2	1	2	2	1	3	4	1	5	13	3	2	1	2	1	2	20	1	1	2	8	3	3	3	4	2	1	8	1	1	0	2	1	4	2	8	6	2	2	1	4
[truncated: 10 more columns]

## Sheet: KW Long Form
Hailstone	Chemical Abbreviation	Count	Rank			ni	Chemical	Sum of Ranks (Ri)	Ri2/ni	count
DR042820HA10	PC	4	180.5			1	ACR	70.5	4970.25	1
DR042820HA10	RUBB	1	70.5			1	ARA	70.5	4970.25	2
DR042820HA10	PET	1	70.5			1	BMC	70.5	4970.25	3
DR042820HA10	PA	1	70.5			11	BR3	1030.5	96539.1	4
DR042821HA32	PS	1	70.5			3	DLTDP	211.5	14910.8	5
DR042821HA32	PAM	1	70.5			13	EPX	1701	222569	6
DR042821HA32	PI	2	155.5			1	EVA	70.5	4970.25	7
DR042821HA32	EPX	2	155.5			2	FEP	141	9940.5	8
DR042821HA32	HRB	1	70.5			2	HDPE	141	9940.5	9
DR042821HA32	PC	5	182.5			1	HERB	70.5	4970.25	10
DR042821HA32	PBT	1	70.5			2	HLAS	141	9940.5	11
DR042821HA32	PPS	1	70.5			2	HRB	226	25538	12
DR041120HD03	PVDF	1	70.5			1	IIR	70.5	4970.25	13
DR041120HD03	PC	8	186			3	LDPE	211.5	14910.8	14
DR041120HD03	RUBB	1	70.5			4	LS770	282	19881	15
DR041120HD03	PA	1	70.5			1	MEL	70.5	4970.25	16
DR041120HD03	PTFE2	1	70.5			5	NYL	352.5	24851.2	17
DR041120HE02	PC	5	182.5			13	PA	1276	125244	18
DR041120HE02	PEG	2	155.5			3	PAC	211.5	14910.8	19
DR041120HE02	BR3	1	70.5			2	PAM	141	9940.5	20
DR041120HE02	SI	1	70.5			1	PAP	70.5	4970.25	21
DR041120HE02	PUR	1	70.5			2	PAR	141	9940.5	22
DR041120HE02	BMC	1	70.5			1	PB1	70.5	4970.25	23
DR041120HE02	PEI	1	70.5			2	PBT	141	9940.5	24
DR041120HG02	PC	3	175			20	PC	3248	527475	25
DR041120HG02	PEEK	2	155.5			1	PCL	70.5	4970.25	26
DR041120HG02	SI	2	155.5			1	PDI	70.5	4970.25	27
DR041120HG02	PB1	1	70.5			2	PEEK	226	25538	28
DR041120HG02	PEG	1	70.5			8	PEG	649	52650.1	29
DR041120HG06	NYL	1	70.5			3	PEI	211.5	14910.8	30
DR041120HG06	RUBB	2	155.5			3	PEPQ	211.5	14910.8	31
DR041120HG06	PI	1	70.5			3	PES	211.5	14910.8	32
DR041120HG06	PC	7	184.5			4	PET	367	33672.2	33
DR041120HG06	PAC	1	70.5			2	PETG	141	9940.5	34
DR041120HG06	PES	1	70.5			1	PHSI	70.5	4970.25	35
DR041120HG06	PVDF	1	70.5			8	PI	819	83845.1	36
DR041120HG06	HRB	2	155.5			1	PIB	70.5	4970.25	37
DR041120HG06	STR	1	70.5			1	PIP	70.5	4970.25	38
DR041120HG06	LDPE	1	70.5			5	PLT	0	0	39
DR041120HG06	BR3	1	70.5			2	PMP	141	9940.5	40
DR041120HJ03	BR3	1	70.5			1	POM	70.5	4970.25	41
DR041120HJ03	SMA	1	70.5			4	PP	282	19881	42
DR041120HJ03	NYL	1	70.5			2	PPO	141	9940.5	43
DR041120HJ03	LS770	1	70.5			8	PPS	889.5	98901.3	44
DR041120HJ03	PEI	1	70.5			6	PS	423	29821.5	45
DR041120HJ03	PC	1	70.5			2	PSO	141	9940.5	46
DR041120HJ03	PEG	1	70.5			2	PTFE2	141	9940.5	47
DR041120HJ28	HDPE	1	70.5			1	PUR	70.5	4970.25	48
DR041120HJ28	PC	1	70.5			4	PVC	452	51076	49
DR041120HJ28	EPX	1	70.5			1	PVDC	70.5	4970.25	50
DR041120HJ28	PEPQ	1	70.5			3	PVDF	282	26508	51
DR041120HJ28	PET	1	70.5			6	RUBB	593	58608.2	52
DR041120HM01	PC	3	175			1	SB	70.5	4970.25	53
DR041120HM01	PET	2	155.5			1	SBS	70.5	4970.25	54
DR041120HM01	PA	1	70.5			3	SI	296.5	29304.1	55
DR041120HM01	HLAS	1	70.5			1	SMA	70.5	4970.25	56			2.23207e+07	34782	641.732	561	80.7317
DR041120HM01	PSO	1	70.5			1	STR	70.5	4970.25	57
DR041120HM01	BR3	1	70.5			1	WOIL	70.5	4970.25	58
DR041120HM01	PPS	1	70.5		N=	186			1.86006e+06
DR041120HM01	EPX	1	70.5
DR041120HR01	BR3	2	155.5			dof =	56
DR041120HR01	PC	10	187			H Statistic=	80.7317
DR041120HR01	PS	1	70.5			alpha =	0.05
DR041120HR01	PPO	1	70.5			p value =	0.0169156
DR041120HR01	PAP	1	70.5
DR041120HR01	ACR	1	70.5
DR041120HR01	PP	1	70.5
DR041120HT03	PPS	1	70.5
DR041120HT03	PA	2	155.5
DR041120HT03	PAC	1	70.5
DR041120HT03	PVC	1	70.5
DR041120HT03	PC	3	175
DR041120HT03	NYL	1	70.5
DR041120HT03	PCL	1	70.5
DR041120HT03	BR3	1	70.5
DR041120HT03	PVDC	1	70.5
UV042821HA04	EPX	1	70.5
UV042821HA04	PTFE2	1	70.5
UV042821HA04	PIB	1	70.5
UV042821HA04	PA	1	70.5
UV042821HA04	PC	11	188
UV042821HA04	MEL	1	70.5
UV042821HA04	PEG	1	70.5
UV042821HA04	FEP	1	70.5
UV042821HA04	BR3	1	70.5
UV042821HA05	PPS	2	155.5
UV042821HA05	DLTDP	1	70.5
UV042821HA05	PEG	1	70.5
UV042821HA05	RUBB	1	70.5
UV042821HA05	EPX	2	155.5
UV042821HA05	PDI	1	70.5
UV042821HA05	LDPE	1	70.5
UV042821HA05	PEPQ	1	70.5
UV042821HA05	PC	3	175
UV042821HA05	PI	1	70.5
UV042821HA05	PA	2	155.5
UV042821HA05	LS770	1	70.5
UV042821HA05	PS	1	70.5
UV042821HA05	PEI	1	70.5
UV042821HA05	PHSI	1	70.5
UV042821HA05	PAM	1	70.5
UV042821HA11	PP	1	70.5
UV042821HA11	PA	1	70.5
UV042821HA11	PPS	2	155.5
UV042821HA11	PS	1	70.5
UV042821HA11	EPX	2	155.5
UV042821HA11	PIP	1	70.5
UV042821HA12	PVC	2	155.5
UV042821HA12	PPS	2	155.5
UV042821HA12	EPX	2	155.5
UV042821HA12	PVDF	1	70.5
UV042821HA12	HLAS	1	70.5
UV042821HA12	PAR	1	70.5
UV042821HA12	PA	1	70.5
UV042821HA12	PC	3	175
UV042821HA12	LS770	1	70.5
UV042821HA12	PI	1	70.5
UV042821HA12	PEG	1	70.5
UV042821HA12	PVDF	1	70.5
UV042821HA22	EPX	1	70.5
UV042821HA22	PC	4	180.5
UV042821HA22	HDPE	1	70.5
UV042821HA22	PPS	1	70.5
UV042821HA22	PEG	1	70.5
UV042821HA22	WOIL	1	70.5
UV042821HA22	PA	1	70.5
UV042821HA22	BR3	2	155.5
UV042821HA22	SB	1	70.5
UV042821HA22	PI	1	70.5
UV042821HA31	PI	2	155.5
UV042821HA31	PC	3	175
UV042821HA31	PMP	1	70.5
UV042821HA31	PPS	1	70.5
UV042821HA31	PP	1	70.5
UV042821HA31	PA	3	175
UV042821HA31	EPX	2	155.5
UV042821HA31	PPS	1	70.5
UV042821HA31	RUBB	2	155.5
UV042821HA31	DLTDP	1	70.5
UV042821HA31	BR3	1	70.5
UV042821HA31	HERB	1	70.5
UV042821HA34	PA	2	155.5
UV042821HA34	EPX	2	155.5
UV042821HA34	LS770	1	70.5
UV042821HA34	POM	1	70.5
UV042821HA34	PC	1	70.5
UV042821HA34	SBS	1	70.5
UV042821HA34	SI	1	70.5
UV042821HA34	PEG	1	70.5
UV042821HA34	IIR	1	70.5
UV042821HA34	PSO	1	70.5
UV042821HA34	RUBB	1	70.5
UV042821HA34	PETG	1	70.5
UV042821HA34	EVA	1	70.5
UV042821HA46	PVC	1	70.5
UV042821HA46	PES	1	70.5
UV042821HA46	PP	1	70.5
UV042821HA46	PEPQ	1	70.5
UV042821HA46	PPO	1	70.5
UV042821HA46	PA	1	70.5
UV042821HA46	PI	2	155.5
UV042821HA46	PETG	1	70.5
UV042821HA46	PS	1	70.5
UV042821HA46	BR3	1	70.5
UV042821HA46	EPX	2	155.5
UV042821HA46	PC	2	155.5
UV042821HA46	ARA	1	70.5
UV042821HA46	PET	1	70.5
UV042821HA48	EPX	3	175
UV042821HA48	PA	1	70.5
UV042821HA48	PC	3	175
UV042821HA48	PVC	2	155.5
UV042821HA48	NYL	1	70.5
UV042821HA48	PEEK	1	70.5
UV042821HA48	LDPE	1	70.5
UV042821HA48	PAR	1	70.5
UV042821HA48	PAC	1	70.5
UV042821HA48	PBT	1	70.5
UV042821HA52	PC	7	184.5
UV042821HA52	FEP	1	70.5
UV042821HA52	EPX	2	155.5
UV042821HA52	PI	1	70.5
UV042821HA52	PMP	1	70.5
UV042821HA52	PS	1	70.5
UV042821HA52	BR3	2	155.5
UV042821HA52	DLTDP	1	70.5
UV042821HA52	NYL	1	70.5
UV042821HA52	PES	1	70.5
		288
